# Supplementary material for: Altered Mitochondria Functionality Defines a Metastatic Cell State in Lung Cancer and Creates an Exploitable Vulnerability
Source: Oxford University Press journal article supplement (doi:10.1158/0008-5472.can-20-1865), 2020-11-25
Supplement: 00085472can201865-sup-244539_2_supp_6715422_qjmwrg.xlsx [file 00085472can201865-sup-244539_2_supp_6715422_qjmwrg.xlsx]

## Sheet: Table S1
Table S1: Primary Screen analysis. This table shows the change in shRNA abundance upon in vitro proliferation of genes screened in this study including the shRNA targeting sequences. Each value represents the reads for that shRNA/total reads from that samples per million (log2)
								368T1 Non-meta									394T4 Non-meta									482N1 metastasis									238N1 metastasis
Hairpin Sequence	Gene Symbol	Hairpin IDs	Early 368T1, Non-meta	Early 394T4, Non-meta	Early 482N1, metastasis	Early 238N1, metastasis		Late (Replicate1)	Late (Replicate2)	Late (Replicate3)	Early-Late (Replicate1)	Early-Late (Replicate2)	Early-Late (Replicate3)	Average Diff (log2)	SD		Late (Replicate1)	Late (Replicate2)	Late (Replicate3)	Early-Late (Replicate1)	Early-Late (Replicate2)	Early-Late (Replicate3)	Average Diff (log2)	SD		Late (Replicate1)	Late (Replicate2)	Late (Replicate3)	Early-Late (Replicate1)	Early-Late (Replicate2)	Early-Late (Replicate3)	Average Diff (log2)	SD		Late (Replicate1)	Late (Replicate2)	Late (Replicate3)	Early-Late (Replicate1)	Early-Late (Replicate2)	Early-Late (Replicate3)	Average Diff (log2)	SD		368T1Average Diff (log2)	394T4Average Diff (log2)	482N1Average Diff (log2)	238N1Average Diff (log2)	Mean of 368T1 and 394T4	Mean of 482N1 and 238N1
CCCTTGCATTAGAAACTACAT	39507	TRCN0000175494	4.12972	4.32735	4.43877	4.29467		5.32895	4.78163	4.57602	-1.19923	-0.651913	-0.446295	-0.765812	0.389175		6.01186	5.83109	5.8416	-1.68451	-1.50374	-1.51425	-1.5675	0.101467		3.90382	6.34064	5.28279	0.534954	-1.90187	-0.844014	-0.736976	1.22193		2.40615	4.48176	1.98496	1.88853	-0.18709	2.30971	1.33705	1.33664		-0.765812	-1.5675	-0.736976	1.33705	-1.16666	0.300037
CGAAAGAAAGATGACCACATT	39507	TRCN0000176313	3.7875	4.08166	3.70134	2.99253		4.89644	4.95257	3.94806	-1.10894	-1.16507	-0.160564	-0.811525	0.564447		4.23232	4.68143	4.10791	-0.150655	-0.599765	-0.0262445	-0.258888	0.301691		3.62221	4.20299	4.9277	0.0791302	-0.501656	-1.22636	-0.549628	0.654065		1.68651	0.307896	1.84346	1.30602	2.68463	1.14907	1.71324	0.844901		-0.811525	-0.258888	-0.549628	1.71324	-0.535206	0.581805
GAGAAGAACTTCCCGTGTAAT	39507	TRCN0000173561	4.24523	3.90028	4.74254	4.13327		2.51124	3.57179	2.35478	1.73399	0.673444	1.89045	1.43263	0.66211		0.819995	2.37703	3.31229	3.08028	1.52324	0.587983	1.7305	1.25901		0.94785	5.90338	1.7373	3.79469	-1.16085	3.00523	1.87969	2.6626		0.704888	2.31509	0.492412	3.42838	1.81818	3.64086	2.96248	0.996664		1.43263	1.7305	1.87969	2.96248	1.58157	2.42108
GCAAGTCGATCAAGTAACATA	39507	TRCN0000176143	3.66007	3.1471	3.50381	3.90226		1.67443	1.621	0.881068	1.98564	2.03907	2.779	2.2679	0.44343		1.38258	1.40733	1.60613	1.76452	1.73978	1.54098	1.68176	0.122547		4.48543	0.323675	0	-0.981623	3.18013	3.50381	1.90077	2.50147		0.28586	0.594347	1.98496	3.6164	3.30791	1.9173	2.94721	0.90516		2.2679	1.68176	1.90077	2.94721	1.97483	2.42399
GCTGGCTACTGGACTCTTAAA	39508	TRCN0000126185	3.58018	3.30143	3.74036	3.51358		3.55554	2.39013	3.21609	0.0246414	1.19005	0.364088	0.526261	0.599393		2.32721	2.04062	2.80591	0.97422	1.26081	0.495527	0.910185	0.386639		0.582726	1.49747	2.02848	3.15764	2.24289	1.71189	2.37081	0.731314		0.865336	0	0.601923	2.64824	3.51358	2.91165	3.02449	0.443566		0.526261	0.910185	2.37081	3.02449	0.718223	2.69765
GCCACCTCAATATGTAGCACA	39508	TRCN0000126186	2.16017	3.19291	2.9919	3.74724		4.54903	4.24496	3.89161	-2.38886	-2.08479	-1.73143	-2.06836	0.329019		4.68495	3.96218	4.50306	-1.49205	-0.769278	-1.31016	-1.19049	0.37595		2.6497	3.42575	4.58403	0.342196	-0.433856	-1.59214	-0.561266	0.973441		2.99729	2.42873	2.66955	0.749953	1.31852	1.0777	1.04872	0.285387		-2.06836	-1.19049	-0.561266	1.04872	-1.62943	0.243728
TGGTCTCTTTCCGATACCATT	39508	TRCN0000126187	3.89832	3.78537	4.3085	4.12184		3.13539	3.58992	3.34562	0.76293	0.308397	0.552698	0.541342	0.22748		3.62833	3.74687	3.21122	0.157045	0.0385069	0.574153	0.256568	0.28135		2.07666	4.38767	1.6654	2.23183	-0.0791756	2.64309	1.59858	1.46746		2.18065	0.0948736	1.70304	1.94119	4.02697	2.4188	2.79565	1.09276		0.541342	0.256568	1.59858	2.79565	0.398955	2.19712
CTGGTCTCTTTCCGATACCAT	39508	TRCN0000126188	0.133933	0.514661	0.123228	0.352715		0.332932	0.124667	0.0442899	-0.198999	0.00926567	0.0896429	-0.0333635	0.148968		0.252597	0.362892	0.324282	0.262064	0.151769	0.190379	0.201404	0.0559677		0.339625	0.170896	0.0906321	-0.216397	-0.0476677	0.0325959	-0.0771562	0.127089		1.58478	0.422081	0.0523899	-1.23207	-0.069366	0.300325	-0.333702	0.799663		-0.0333635	0.201404	-0.0771562	-0.333702	0.0840203	-0.205429
GCGTCTGCTATATTGTGGTTA	39512	TRCN0000176141	3.79763	3.4597	3.50381	3.15834		3.71296	4.07768	3.63346	0.0846695	-0.28005	0.16417	-0.0104035	0.23688		3.94746	4.11816	3.68009	-0.487761	-0.658464	-0.220392	-0.455539	0.220806		2.9881	4.9123	1.45974	0.515708	-1.4085	2.04407	0.38376	1.73006		1.83789	3.06608	1.75138	1.32046	0.0922625	1.40696	0.939893	0.735343		-0.0104035	-0.455539	0.38376	0.939893	-0.232971	0.661827
CGACATGAACTGGAATGCTTT	39512	TRCN0000175382	3.70021	3.97428	3.30122	3.47816		2.42089	3.26821	2.46478	1.27932	0.432004	1.23543	0.982252	0.477034		3.71497	3.71231	4.03338	0.25931	0.261972	-0.0590995	0.154061	0.184607		2.26769	2.76231	4.41017	1.03353	0.538904	-1.10895	0.154493	1.12178		1.2109	1.53765	0.151786	2.26726	1.94051	3.32637	2.51138	0.724466		0.982252	0.154061	0.154493	2.51138	0.568156	1.33294
CTTATGGTTTCTGAGGAATTT	39512	TRCN0000175235	4.17962	4.14129	4.50825	4.18086		3.11152	2.98543	2.82993	1.06811	1.19419	1.34969	1.204	0.14105		3.25311	1.7032	2.38645	0.888176	2.43809	1.75484	1.6937	0.776762		2.6497	2.54638	4.36322	1.85855	1.96188	0.145038	1.32182	1.02043		1.57155	1.84114	2.03789	2.60932	2.33972	2.14298	2.36401	0.234116		1.204	1.6937	1.32182	2.36401	1.44885	1.84292
CCATTTATAGACATCTCCGAA	39512	TRCN0000193266	4.36585	4.33247	4.66859	3.8478		4.2586	4.01731	3.95388	0.107252	0.348544	0.411974	0.289257	0.16078		4.82789	4.60437	4.29035	-0.495411	-0.271891	0.0421231	-0.241726	0.270034		4.90519	4.06347	5.10123	-0.236603	0.60512	-0.432638	-0.0213738	0.551342		5.01387	4.93554	2.63561	-1.16607	-1.08774	1.21219	-0.347208	1.35105		0.289257	-0.241726	-0.0213738	-0.347208	0.0237651	-0.184291
CCATAAGAGAATGCTTGATAT	39513	TRCN0000176688	5.00001	4.60232	5.00807	4.84973		5.33618	5.27751	5.38142	-0.336171	-0.277503	-0.381415	-0.331696	0.0521002		5.37867	4.96737	6.25528	-0.776349	-0.365051	-1.65296	-0.931454	0.657816		4.8647	4.82539	4.80089	0.143372	0.18268	0.20718	0.177744	0.0321892		4.05903	2.24442	5.01944	0.790698	2.60532	-0.169709	1.07543	1.40925		-0.331696	-0.931454	0.177744	1.07543	-0.631575	0.62659
CGTCAGATGTACCACCTAGAT	39513	TRCN0000182847	3.0411	1.51476	2.55449	3.54815		0.899358	0.732815	1.31986	2.14175	2.30829	1.72124	2.05709	0.302541		2.03558	0.817762	0.857688	-0.520814	0.697002	0.657076	0.277754	0.691869		1.81621	1.70648	1.90903	0.738271	0.848008	0.645459	0.743913	0.101392		0	0	0.67057	3.54815	3.54815	2.87758	3.32462	0.387154		2.05709	0.277754	0.743913	3.32462	1.16742	2.03427
CGAGAATCTTCTGACAATGAA	39513	TRCN0000176591	2.06276	2.61915	2.52499	1.80432		1.27096	1.0794	1.18789	0.791799	0.983356	0.874866	0.88334	0.096059		1.36125	1.63103	1.26317	1.25791	0.988125	1.35598	1.20067	0.190492		0.221434	0.758443	0	2.30355	1.76654	2.52499	2.19836	0.39001		0.0769479	0.833235	0.492412	1.72738	0.971089	1.31191	1.33679	0.378757		0.88334	1.20067	2.19836	1.33679	1.04201	1.76758
GACTCCTCCTTTAGACTGGAT	39513	TRCN0000182439	3.70739	4.16446	3.87213	3.5223		3.19567	2.82931	3.50465	0.511724	0.878086	0.202741	0.530851	0.338079		2.98675	3.26481	3.45912	1.17771	0.899657	0.705345	0.927572	0.237418		2.72403	3.91502	3.59152	1.1481	-0.0428971	0.28061	0.461937	0.615855		3.46277	3.71885	1.47254	0.0595236	-0.196552	2.04976	0.637576	1.22967		0.530851	0.927572	0.461937	0.637576	0.729211	0.549756
GCAACTTAACCTGGAGGATTT	39513	TRCN0000181699	5.05452	4.90717	4.87265	4.40015		4.13142	4.94413	4.93036	0.923093	0.110384	0.124158	0.385879	0.465293		3.53615	4.55841	5.84793	1.37102	0.348765	-0.940753	0.259678	1.15846		6.11577	7.67401	5.9469	-1.24312	-2.80136	-1.07425	-1.70624	0.952148		5.42692	4.59767	5.78311	-1.02677	-0.197521	-1.38296	-0.869082	0.608246		0.385879	0.259678	-1.70624	-0.869082	0.322779	-1.28766
GCAAGGTGTACCTACAGTTAT	39514	TRCN0000127310	3.7875	4.23732	3.71447	4.0543		3.46424	2.53196	3.66571	0.323259	1.25554	0.121788	0.566861	0.604859		2.50308	3.12466	4.15856	1.73424	1.11265	0.0787585	0.975216	0.836253		2.20678	1.39772	2.0399	1.50768	2.31675	1.67457	1.833	0.427167		0.0769479	0.0948736	1.94394	3.97735	3.95943	2.11036	3.34905	1.07277		0.566861	0.975216	1.833	3.34905	0.771039	2.59102
CCATGAGTCATCCAAGCAACA	39514	TRCN0000127313	2.82706	3.51484	3.12565	2.2655		2.76491	3.14114	3.20638	0.0621456	-0.314079	-0.379322	-0.210418	0.238291		2.54152	2.67858	3.41813	0.973321	0.836263	0.0967082	0.635431	0.471554		0.339625	3.2462	1.92143	2.78602	-0.120547	1.20422	1.2899	1.45518		0.604498	1.19627	0.858848	1.66101	1.06923	1.40666	1.37897	0.296856		-0.210418	0.635431	1.2899	1.37897	0.212506	1.33443
CACTTCTGTCACACCATCCAA	39514	TRCN0000127312	3.43202	2.77786	2.56177	3.67087		1.68741	2.56901	2.61183	1.74461	0.86301	0.820187	1.1426	0.521793		3.212	3.2359	1.95772	-0.434138	-0.458044	0.820141	-0.0240139	0.731157		2.21711	2.00654	4.90602	0.344652	0.555227	-2.34426	-0.481459	1.61666		1.99485	0.777118	1.17464	1.67602	2.89375	2.49623	2.35533	0.620971		1.1426	-0.0240139	-0.481459	2.35533	0.559294	0.936937
CCCACATAGATAGGTGGCTTT	39514	TRCN0000127309	3.64892	2.82225	3.30989	3.73604		3.47924	4.20786	3.14669	0.169682	-0.558938	0.502233	0.0376591	0.542765		3.44783	2.9984	2.96958	-0.625581	-0.176147	-0.147332	-0.316353	0.268186		3.76636	4.1681	3.53615	-0.456471	-0.858207	-0.22626	-0.513646	0.31983		4.42371	2.4647	3.0824	-0.687665	1.27134	0.65364	0.412439	1.00153		0.0376591	-0.316353	-0.513646	0.412439	-0.139347	-0.0506036
TGCAAGGTGTACCTACAGTTA	39514	TRCN0000127311	3.58409	3.50579	3.36504	3.48263		2.77102	2.01386	3.04137	0.813066	1.57022	0.542721	0.975337	0.532626		0.426994	3.01551	2.41703	3.0788	0.490285	1.08877	1.55262	1.35516		2.56326	2.43336	1.99367	0.801779	0.931676	1.37137	1.03494	0.298506		3.54633	2.70171	0.601923	-0.063695	0.780926	2.88071	1.19931	1.51614		0.975337	1.55262	1.03494	1.19931	1.26398	1.11713
CCATCAGCCCATTTGCAAGAT	39517	TRCN0000189631	4.36358	4.08774	3.20219	4.24021		1.81113	3.00178	2.88576	2.55245	1.3618	1.47782	1.79736	0.656497		3.76456	1.99535	1.5101	0.323177	2.09239	2.57764	1.6644	1.1866		1.90835	2.82766	3.51176	1.29384	0.374531	-0.309564	0.452934	0.804571		3.79434	2.5509	0.916516	0.445869	1.68931	3.32369	1.81963	1.44333		1.79736	1.6644	0.452934	1.81963	1.73088	1.13628
GCCCTTGCACTTAAACCAGAT	39691	TRCN0000101790	2.72462	3.7243	3.71447	3.30705		3.54489	3.4579	4.04661	-0.820265	-0.733283	-1.32199	-0.958514	0.317772		2.98675	3.88671	3.00525	0.737546	-0.162409	0.719052	0.431396	0.514334		2.22737	1.17477	2.30889	1.48709	2.53969	1.40557	1.81079	0.632567		1.40246	2.12585	0.332129	1.90458	1.1812	2.97492	2.02023	0.902436		-0.958514	0.431396	1.81079	2.02023	-0.263559	1.91551
ACCCACCTTCAGGACTTGAAA	39691	TRCN0000101793	1.0942	0.44065	2.21907	1.31537		0.230261	1.2893	0.856438	0.863937	-0.195105	0.237759	0.302197	0.532453		0.252597	0.212743	0	0.188052	0.227907	0.44065	0.285536	0.135802		1.54811	0.703797	0	0.670955	1.51527	2.21907	1.46843	0.77512		0	0	0	1.31537	1.31537	1.31537	1.31537	0		0.302197	0.285536	1.46843	1.31537	0.293867	1.3919
CGCTTCATTGAGGAGCAGTTT	39691	TRCN0000101794	4.27936	5.2291	4.28449	4.52689		2.53297	2.39013	2.60445	1.74639	1.88923	1.67491	1.77018	0.109124		2.21277	3.53382	3.63202	3.01633	1.69529	1.59709	2.1029	0.792577		2.53875	5.45972	1.65058	1.74574	-1.17523	2.63391	1.06814	1.99292		1.17635	0.422081	0.0523899	3.35054	4.10481	4.4745	3.97661	0.572839		1.77018	2.1029	1.06814	3.97661	1.93654	2.52238
GCAGTGCACGAGAAAGTCAAT	39691	TRCN0000101792	3.95673	4.40238	3.5775	3.98028		3.74434	3.27719	4.08952	0.212388	0.67954	-0.132783	0.253048	0.407685		2.30504	3.04358	3.69576	2.09734	1.3588	0.706613	1.38758	0.695809		1.68838	2.48288	2.773	1.88911	1.09462	0.804495	1.26274	0.561516		1.9341	1.61971	4.45493	2.04619	2.36057	-0.474644	1.3107	1.55413		0.253048	1.38758	1.26274	1.3107	0.820315	1.28672
CTCTACTTCATCTCACCCTTT	39691	TRCN0000101791	3.94463	3.59379	4.13875	3.46917		4.75721	3.97929	2.86739	-0.812584	-0.0346567	1.07724	0.0766657	0.949817		3.61487	3.68405	4.15856	-0.0210788	-0.0902572	-0.564765	-0.225367	0.295955		4.72508	3.92102	4.9169	-0.586331	0.217722	-0.778154	-0.382254	0.528373		3.10226	4.00196	1.95775	0.36691	-0.532794	1.51142	0.448512	1.02455		0.0766657	-0.225367	-0.382254	0.448512	-0.0743506	0.033129
CGATACACAATAAGGTGAATA	39692	TRCN0000101766,TRCN0000332463	4.0444	3.83677	4.79291	4.27674		4.38944	4.84039	3.71449	-0.345035	-0.795985	0.329907	-0.270371	0.566647		4.25274	4.42391	4.85542	-0.415963	-0.587138	-1.01864	-0.673915	0.310571		4.82303	3.94478	3.36967	-0.0301198	0.848125	1.42324	0.74708	0.731928		2.49995	5.34559	4.87783	1.77679	-1.06885	-0.601081	0.0356216	1.52593		-0.270371	-0.673915	0.74708	0.0356216	-0.472143	0.391351
GTAGAGAATGAGGACATGAAT	39692	TRCN0000101768,TRCN0000332532	3.93854	4.30666	4.35534	3.67087		4.02299	3.51217	4.1363	-0.0844468	0.426372	-0.197762	0.0480542	0.332495		3.212	2.56695	3.23287	1.09467	1.73971	1.0738	1.30273	0.378585		3.64151	3.10573	0.256419	0.713825	1.24961	4.09892	2.02079	1.81955		3.71531	0.346971	6.2688	-0.044443	3.3239	-2.59793	0.227174	2.97024		0.0480542	1.30273	2.02079	0.227174	0.67539	1.12398
GAAGCCCTTAGATGTTGCATT	39692	TRCN0000101769,TRCN0000332466	4.2128	3.8864	3.62693	4.09871		3.07742	3.98752	2.99134	1.13538	0.225282	1.22146	0.860708	0.551976		2.42298	3.42704	3.02026	1.46342	0.459361	0.866142	0.929642	0.505035		4.29374	3.04107	0	-0.666815	0.585855	3.62693	1.18199	2.20807		2.87334	3.51522	2.35189	1.22537	0.58349	1.74682	1.18523	0.582701		0.860708	0.929642	1.18199	1.18523	0.895175	1.18361
CGGCTTATTCATCTGCACAAT	39692	TRCN0000101765,TRCN0000332465	8.5227	8.40056	8.61517	8.52373		8.40878	8.46278	8.40768	0.113928	0.0599214	0.115024	0.0962912	0.031502		7.65926	7.9642	7.96378	0.7413	0.436362	0.436785	0.538149	0.175934		8.63811	8.2743	8.33992	-0.0229425	0.340872	0.27525	0.197727	0.193901		9.49155	9.2508	9.00367	-0.967822	-0.727068	-0.479933	-0.724941	0.243952		0.0962912	0.538149	0.197727	-0.724941	0.31722	-0.263607
GCTTCGACTGTTGAGATTGAA	39692	TRCN0000101767,TRCN0000332533	3.37904	3.57662	2.84446	3.33206		1.84627	3.32562	2.14708	1.53277	0.0534216	1.23196	0.939383	0.781867		1.15357	1.73109	3.30414	2.42305	1.84553	0.27248	1.51368	1.11302		4.62969	2.76231	2.20114	-1.78523	0.0821517	0.643323	-0.353251	1.27147		4.64675	5.84851	2.15032	-1.31469	-2.51645	1.18174	-0.883132	1.88649		0.939383	1.51368	-0.353251	-0.883132	1.22653	-0.618192
GCTTTCTCCATGACTCTCCAT	39693	TRCN0000101414	4.29136	4.32221	4.5344	4.4352		5.18768	4.64952	5.22306	-0.896325	-0.358167	-0.931704	-0.728732	0.321406		4.88319	4.71498	4.81149	-0.560981	-0.392777	-0.489285	-0.481014	0.0844069		3.25702	3.82188	2.3825	1.27738	0.712521	2.1519	1.3806	0.72522		3.57646	6.00099	2.42325	0.858749	-1.56578	2.01195	0.434972	1.82613		-0.728732	-0.481014	1.3806	0.434972	-0.604873	0.907787
CAAAGAAGTAACACACAACAT	39693	TRCN0000101411	4.22035	4.01947	4.38643	4.21623		3.04753	4.48289	4.76155	1.17282	-0.262539	-0.541204	0.123024	0.919761		5.47987	4.36728	5.64973	-1.4604	-0.347814	-1.63026	-1.14616	0.696584		3.76636	3.85986	5.52752	0.620065	0.526567	-1.14109	0.00184762	0.990916		6.84934	3.29313	3.20318	-2.63311	0.9231	1.01305	-0.232321	2.07963		0.123024	-1.14616	0.00184762	-0.232321	-0.511568	-0.115237
CCAGACTTTCTAAATTGACTT	39693	TRCN0000101410	4.3127	4.79284	4.1142	4.21891		5.03106	4.61805	5.05736	-0.718362	-0.305354	-0.744655	-0.589457	0.246391		5.17978	4.66164	4.88169	-0.386936	0.1312	-0.0888548	-0.114864	0.260045		5.60813	5.40939	4.68385	-1.49393	-1.29519	-0.569654	-1.11959	0.486516		3.40798	6.47556	3.84672	0.81093	-2.25665	0.372194	-0.357843	1.65898		-0.589457	-0.114864	-1.11959	-0.357843	-0.35216	-0.738717
GAAATACATCAACGAACAGTA	39693	TRCN0000101413	4.50215	4.3926	4.59775	4.18362		4.93776	4.55113	4.31188	-0.435603	-0.048976	0.190274	-0.0981018	0.315817		4.4348	4.32902	3.59906	-0.0422002	0.0635796	0.79354	0.27164	0.455063		3.86164	5.26115	5.74979	0.736114	-0.663399	-1.15204	-0.359774	0.980009		6.39181	4.77289	2.25462	-2.2082	-0.589277	1.92899	-0.289494	2.08482		-0.0981018	0.27164	-0.359774	-0.289494	0.086769	-0.324634
CCTAAAGGAAAGCATCCCATT	39694	TRCN0000101736	4.00123	3.92763	4.10675	4.88903		3.86918	3.87369	3.12623	0.132049	0.127541	0.875	0.378196	0.43025		4.40383	4.44301	4.81867	-0.476204	-0.515379	-0.891039	-0.627541	0.229035		3.50483	4.1375	6.33769	0.601916	-0.0307506	-2.23094	-0.553258	1.48695		3.42648	1.21751	3.68605	1.46255	3.67152	1.20298	2.11235	1.3565		0.378196	-0.627541	-0.553258	2.11235	-0.124672	0.779546
AGAGTGGTACTGACTTCCCTA	39694	TRCN0000101739	3.24236	2.76275	3.03961	3.39514		1.35469	2.10748	2.79147	1.88767	1.13488	0.450895	1.15782	0.718663		0.788376	1.91253	2.53326	1.97437	0.850225	0.229492	1.01803	0.884462		2.80845	1.67841	2.30889	0.231166	1.3612	0.730717	0.774362	0.56628		0.149999	1.68216	1.51049	3.24514	1.71298	1.88465	2.28092	0.839437		1.15782	1.01803	0.774362	2.28092	1.08792	1.52764
TAAATCTCTTCTTCCTGCCTA	39694	TRCN0000101735	2.91031	3.48753	2.69355	2.99253		2.95934	3.54601	3.84854	-0.0490256	-0.635693	-0.93823	-0.540983	0.452105		3.35915	2.80859	1.97837	0.128386	0.678937	1.50916	0.772162	0.695093		5.12413	2.60719	2.02848	-2.43058	0.0863595	0.665075	-0.559714	1.64585		1.63654	0.626462	4.50982	1.35599	2.36606	-1.5173	0.734918	2.0148		-0.540983	0.772162	-0.559714	0.734918	0.115589	0.0876018
CCGGCCATTGGATGTTGAATT	39694	TRCN0000101737	0.17595	0.362635	0.0833101	0.142558		0.0809064	0.0842967	0.0442899	0.0950432	0.091653	0.13166	0.106119	0.0221841		0	0.0888957	0.0398466	0.362635	0.273739	0.322788	0.319721	0.0445271		0	0.0879768	0	0.0833101	-0.00466665	0.0833101	0.0539845	0.0507934		0	0.0482165	0	0.142558	0.0943415	0.142558	0.126486	0.0278378		0.106119	0.319721	0.0539845	0.126486	0.21292	0.0902352
GCAAGCTTGATCCTTATGATT	39694	TRCN0000101738	2.97124	3.65235	2.98108	1.95363		4.17123	3.08598	3.24485	-1.19999	-0.114742	-0.273609	-0.529448	0.586117		1.38258	2.11659	4.98098	2.26977	1.53576	-1.32864	0.825629	1.9014		0.79071	1.83916	3.69986	2.19037	1.14191	-0.718784	0.871165	1.47335		4.47969	3.00631	1.78273	-2.52606	-1.05268	0.170899	-1.13595	1.3504		-0.529448	0.825629	0.871165	-1.13595	0.14809	-0.132391
GGATCGTCGAAGTGGAGAATC	39695	TRCN0000381788	0.571826	1.28028	1.31391	1.21137		0.603256	1.15931	1.55232	-0.0314295	-0.58748	-0.980492	-0.533134	0.476859		2.07542	0.652603	1.43738	-0.795142	0.627677	-0.157095	-0.108187	0.71267		0	0.0879768	1.958	1.31391	1.22594	-0.644085	0.631922	1.10593		0.0389869	0	0.0523899	1.17238	1.21137	1.15898	1.18091	0.0272162		-0.533134	-0.108187	0.631922	1.18091	-0.32066	0.906415
TGAAACACACCGTCGACATTG	39695	TRCN0000382266	3.03541	2.17015	2.70675	2.90854		0.830833	2.48622	0	2.20458	0.549194	3.03541	1.92973	1.26569		0.0541816	1.71721	0.588883	2.11597	0.452939	1.58127	1.38339	0.848991		0.136894	0.703797	0	2.56985	2.00295	2.70675	2.42652	0.373151		0	0.0482165	0.151786	2.90854	2.86033	2.75676	2.84188	0.077557		1.92973	1.38339	2.42652	2.84188	1.65656	2.6342
CGGAAGCTGAAGGACAGAATA	39695	TRCN0000101514	2.72462	2.94779	2.9865	2.94791		0.899358	1.05871	0.425384	1.82526	1.66591	2.29924	1.93013	0.329432		0.968459	1.1834	0.717302	1.97933	1.76439	2.23049	1.9914	0.233284		0.261916	0.0879768	0	2.72458	2.89852	2.9865	2.86986	0.133289		0	0.0948736	0.373899	2.94791	2.85304	2.57401	2.79166	0.194361		1.93013	1.9914	2.86986	2.79166	1.96077	2.83076
CCGCCTATCATAAGGGAACAA	39695	TRCN0000101510	3.83088	3.92763	3.5703	3.14146		3.12111	3.6007	4.29823	0.709769	0.230186	-0.467344	0.157537	0.59191		3.58758	2.90967	3.12122	0.340053	1.01796	0.806406	0.721472	0.346842		3.54229	1.76102	2.54358	0.028005	1.80927	1.02672	0.954666	0.892817		1.71085	1.86825	1.63596	1.43061	1.27321	1.5055	1.40311	0.118564		0.157537	0.721472	0.954666	1.40311	0.439505	1.17889
TACGTGAGGAGATCGACAAGT	39695	TRCN0000381430	0.856526	0.716321	1.04965	2.32652		0.119719	0.507105	0.522515	0.736807	0.349422	0.334012	0.473414	0.228236		0.910893	0.362892	0.561768	-0.194572	0.35343	0.154553	0.10447	0.277413		1.71779	1.43174	0	-0.668134	-0.38209	1.04965	-0.000191108	0.92037		0.655566	0.0948736	0.736097	1.67095	2.23165	1.59042	1.83101	0.349292		0.473414	0.10447	-0.000191108	1.83101	0.288942	0.915409
CCAGAATGTGATTCGGATGAA	39695	TRCN0000101511	3.44496	3.92084	3.86036	4.33977		4.04332	4.06736	3.44808	-0.598358	-0.622397	-0.00312132	-0.407959	0.350806		4.19362	3.3661	2.89007	-0.272778	0.554738	1.03077	0.437578	0.659626		2.64205	3.10573	1.8323	1.21831	0.754635	2.02806	1.33367	0.644504		3.41541	4.22548	7.47207	0.924358	0.114287	-3.13231	-0.697887	2.14682		-0.407959	0.437578	1.33367	-0.697887	0.0148094	0.317892
CGTCAAGAAAGGTTTCGACTT	39695	TRCN0000101512	3.73576	3.80763	3.73071	2.83345		4.49654	3.45395	2.66244	-0.760774	0.281817	1.07333	0.198124	0.919912		4.18454	3.8201	3.44063	-0.376909	-0.0124773	0.366994	-0.00746435	0.371977		3.39991	4.18316	4.2886	0.3308	-0.452451	-0.557893	-0.226515	0.485519		2.62052	2.13704	2.80549	0.212932	0.696411	0.0279583	0.312434	0.345156		0.198124	-0.00746435	-0.226515	0.312434	0.0953299	0.0429596
GGATCCACGTGTACCAGTTTC	39695	TRCN0000382323	2.13909	2.40234	2.68691	3.31209		1.00679	1.67637	1.35545	1.13229	0.462713	0.783633	0.792879	0.334885		0.545217	1.58593	0.923069	1.85712	0.816408	1.47927	1.38426	0.526819		1.62772	1.78754	0	1.05919	0.899364	2.68691	1.54849	0.989135		4.00098	4.54193	1.07686	-0.688894	-1.22985	2.23523	0.105495	1.86413		0.792879	1.38426	1.54849	0.105495	1.08857	0.826991
GACCTGTATAAGGACCGGAAA	39695	TRCN0000101513	3.66007	2.80761	2.79589	2.77628		3.9305	4.05435	3.64788	-0.270435	-0.394285	0.0121878	-0.217511	0.208341		4.88692	3.3527	3.31636	-2.07932	-0.545094	-0.50875	-1.04439	0.896461		3.50904	2.72163	2.3735	-0.71315	0.0742593	0.422395	-0.0721651	0.581761		6.18793	3.89397	4.72885	-3.41166	-1.11769	-1.95258	-2.16064	1.16105		-0.217511	-1.04439	-0.0721651	-2.16064	-0.630949	-1.1164
ACCGCAAGTCCGTCAAGAAAG	39695	TRCN0000380374	1.52645	1.58516	1.46135	1.70058		0.783272	1.3921	2.13689	0.743179	0.134347	-0.610439	0.0890292	0.677946		0.156798	0.593063	0.64163	1.42836	0.992094	0.943528	1.12133	0.267004		2.57936	2.051	1.02672	-1.11801	-0.589649	0.434631	-0.424344	0.789412		0.113936	0.939316	3.49106	1.58664	0.761263	-1.79048	0.185808	1.76057		0.0890292	1.12133	-0.424344	0.185808	0.605178	-0.119268
GAGCTGAAGATCCGAAGAGTA	39696	TRCN0000112998	3.65265	2.76275	3.79699	3.69034		4.39736	4.76736	4.96821	-0.744706	-1.11471	-1.31556	-1.05833	0.289574		4.38281	5.11092	5.52279	-1.62006	-2.34817	-2.76004	-2.24276	0.577251		5.04369	3.72915	4.41894	-1.2467	0.0678391	-0.621947	-0.60027	0.657539		3.70323	0.385015	3.15008	-0.0128817	3.30533	0.540269	1.27757	1.77774		-1.05833	-2.24276	-0.60027	1.27757	-1.65054	0.338651
ACTGTCTTCAGACACTATTAA	39696	TRCN0000313234	2.96526	2.23727	3.33135	3.84433		3.23598	2.41476	3.06306	-0.270716	0.550503	-0.0977973	0.060663	0.432935		3.60583	2.23818	2.30703	-1.36856	-0.000909449	-0.0697624	-0.479744	0.770507		3.1586	2.74888	3.6523	0.172748	0.582471	-0.320945	0.144758	0.452358		0.865336	3.55748	2.66114	2.97899	0.28685	1.18319	1.48301	1.37088		0.060663	-0.479744	0.144758	1.48301	-0.209541	0.813884
GAACGCCTTCAAGCAGAGAAA	39696	TRCN0000112997,TRCN0000312183	4.08356	4.55048	4.09425	4.13042		4.27803	3.17517	3.836	-0.194476	0.908386	0.247558	0.320489	0.555036		4.05766	4.06711	3.37205	0.492817	0.483369	1.17843	0.718205	0.398593		3.52576	3.53152	2.3825	0.568487	0.562731	1.71175	0.947657	0.661734		2.93664	1.10804	3.83928	1.19378	3.02239	0.291141	1.50244	1.39154		0.320489	0.718205	0.947657	1.50244	0.519347	1.22505
CCCGACAGGACATTCGCTTAA	39696	TRCN0000313161	0.133933	0.192682	0.341994	0.0965863		0.0809064	0.507105	0.699116	0.0530264	-0.373172	-0.565183	-0.29511	0.316411		0.342429	0.398108	0.15318	-0.149748	-0.205427	0.0395013	-0.105224	0.128391		0	0.0879768	0.332675	0.341994	0.254017	0.00931892	0.201777	0.17238		0.57827	0.0948736	0	-0.481684	0.00171272	0.0965863	-0.127795	0.310126		-0.29511	-0.105224	0.201777	-0.127795	-0.200167	0.0369909
GCCATTATAGAAGAGTTAGTT	39696	TRCN0000112995	5.46256	4.54165	5.28268	5.1824		5.10183	5.23088	4.76817	0.360722	0.231672	0.694385	0.428926	0.238778		4.43989	4.98774	5.37777	0.10176	-0.446087	-0.836115	-0.393481	0.471146		4.66973	4.43876	6.2121	0.612949	0.843922	-0.929412	0.17582	0.964101		6.26395	4.65329	5.14387	-1.08155	0.529111	0.0385296	-0.171303	0.825579		0.428926	-0.393481	0.17582	-0.171303	0.0177228	0.00225812
CTGTTTAACACCAAGTTTGAA	39696	TRCN0000112999	3.16102	3.12364	3.48095	4.53768		3.63807	3.11633	2.88576	-0.477051	0.0446901	0.275253	-0.0523693	0.385429		0.910893	2.58998	2.64728	2.21275	0.533661	0.476361	1.07426	0.986379		4.37673	4.30289	1.35393	-0.895783	-0.821943	2.12702	0.13643	1.72429		3.32366	4.73289	3.29844	1.21402	-0.195207	1.23924	0.752683	0.820994		-0.0523693	1.07426	0.13643	0.752683	0.510944	0.444556
CCAAGTCAGATGCCATTTCTA	39696	TRCN0000112996,TRCN0000349426	4.10002	3.68477	3.9491	3.99915		4.18044	4.86443	3.86407	-0.0804186	-0.764405	0.23595	-0.202958	0.511311		3.78473	3.1194	4.6837	-0.0999635	0.565371	-0.998929	-0.17784	0.785052		3.86821	3.32977	4.32639	0.0808971	0.619333	-0.377286	0.107648	0.498848		6.07523	7.3443	4.62673	-2.07608	-3.34516	-0.627585	-2.01628	1.35977		-0.202958	-0.17784	0.107648	-2.01628	-0.190399	-0.954313
CCAGAGGAATGCCAACAGTTT	39697	TRCN0000101849,TRCN0000316367	2.79372	2.79281	3.48095	2.9608		2.09053	2.33957	2.77185	0.703182	0.454142	0.0218683	0.393064	0.344739		1.68691	2.34129	1.95772	1.1059	0.451514	0.835091	0.797502	0.328808		1.27898	1.39772	2.25112	2.20197	2.08323	1.22983	1.83834	0.530323		1.14094	0.183891	0.767778	1.81986	2.77691	2.19302	2.26326	0.482377		0.393064	0.797502	1.83834	2.26326	0.595283	2.0508
GCCTTGAATTGTCTAGGATAT	39697	TRCN0000101845,TRCN0000349183	4.42367	4.0067	4.26455	4.43982		2.02047	2.0352	1.76575	2.4032	2.38847	2.65792	2.4832	0.151493		1.61663	0	1.95772	2.39007	4.0067	2.04898	2.81525	1.04582		3.08718	0.587872	0.0460276	1.17737	3.67668	4.21853	3.02419	1.62218		1.67418	0.805449	0.453979	2.76564	3.63437	3.98584	3.46195	0.628105		2.4832	2.81525	3.02419	3.46195	2.64922	3.24307
CCTTCAGGACATGGACTTAAA	39697	TRCN0000101848,TRCN0000349184	4.85398	4.28039	4.34483	4.41895		3.93867	4.43553	3.93636	0.915307	0.418442	0.917616	0.750455	0.287534		2.84794	3.8005	3.60571	1.43244	0.479889	0.674676	0.862336	0.50324		3.60264	4.47184	3.50353	0.742186	-0.127017	0.841295	0.485488	0.532754		1.46105	1.97188	3.77837	2.9579	2.44707	0.640578	2.01518	1.21753		0.750455	0.862336	0.485488	2.01518	0.806395	1.25034
GCAGTGTTGTTTATACTTCAT	39697	TRCN0000101846,TRCN0000316368	4.90483	5.15871	5.53657	5.26395		6.40326	7.1127	6.23501	-1.49842	-2.20787	-1.33017	-1.67882	0.465826		6.73692	6.35254	6.64016	-1.57821	-1.19383	-1.48144	-1.41783	0.19993		7.11917	7.04825	6.23649	-1.5826	-1.51168	-0.699917	-1.26473	0.490426		8.15663	5.88381	5.47541	-2.89267	-0.619862	-0.211458	-1.24133	1.44461		-1.67882	-1.41783	-1.26473	-1.24133	-1.54832	-1.25303
CGTCGTCAGTTTGAAGAAGAA	39697	TRCN0000101847,TRCN0000316366	3.60731	3.64413	3.4655	3.78397		3.84622	4.29446	3.66571	-0.238917	-0.687157	-0.0584058	-0.32816	0.323736		4.42455	4.79808	3.43317	-0.780423	-1.15395	0.210954	-0.574474	0.705375		5.81952	4.888	4.44064	-2.35402	-1.4225	-0.975137	-1.58389	0.703466		6.15337	5.08748	6.02597	-2.36941	-1.30351	-2.24201	-1.97164	0.582114		-0.32816	-0.574474	-1.58389	-1.97164	-0.451317	-1.77776
GCTAATGAACACACTCTTCAA	39698	TRCN0000112991,TRCN0000326428	4.95396	5.17021	4.78826	4.58423		3.77506	4.03065	4.05746	1.1789	0.923311	0.896502	0.99957	0.155879		3.41197	3.40124	3.66424	1.75824	1.76897	1.50597	1.67772	0.148843		2.07666	2.76231	1.75126	2.7116	2.02595	3.03699	2.59151	0.51611		1.83789	0	1.24386	2.74634	4.58423	3.34037	3.55698	0.937895		0.99957	1.67772	2.59151	3.55698	1.33865	3.07425
CGCCGAGATTAATGCAGTCAT	39698	TRCN0000112992,TRCN0000326349	4.10002	4.17591	3.9766	4.77691		4.46862	3.84075	4.58166	-0.368601	0.259273	-0.481642	-0.19699	0.399157		4.42968	5.37341	5.23703	-0.253766	-1.1975	-1.06111	-0.837459	0.510071		4.16891	3.32977	4.37904	-0.192306	0.646833	-0.402433	0.0173644	0.555168		2.4502	3.77365	3.20318	2.32671	1.00325	1.57373	1.63456	0.663821		-0.19699	-0.837459	0.0173644	1.63456	-0.517224	0.825963
CCGTGTAAGTTATGGTCTAAA	39698	TRCN0000112990,TRCN0000326427	4.16144	3.98733	4.33848	4.41428		3.97352	4.01731	4.06822	0.18792	0.14413	0.093216	0.141755	0.0473966		3.40156	4.08343	3.72661	0.585774	-0.0960908	0.260724	0.250135	0.341055		3.51743	5.16329	3.5641	0.821055	-0.824805	0.774383	0.256877	0.937055		2.8516	0.594347	1.85825	1.56267	3.81993	2.55603	2.64621	1.13133		0.141755	0.250135	0.256877	2.64621	0.195945	1.45154
GATGACAGTTACAGGCCCATA	39698	TRCN0000112994,TRCN0000326426	4.1562	4.40724	4.35114	3.73229		3.20021	2.99635	3.61155	0.955996	1.15985	0.544654	0.886832	0.313374		2.66853	3.15586	1.34497	1.73872	1.25138	3.06227	2.01746	0.937072		2.50542	3.42575	3.95938	1.84572	0.925392	0.391761	1.05429	0.7355		4.18604	0.346971	1.49164	-0.453756	3.38532	2.24065	1.72407	1.97098		0.886832	2.01746	1.05429	1.72407	1.45214	1.38918
CACGCTAATGAACACACTCTT	39698	TRCN0000112993	4.26483	4.07556	4.53069	3.98028		3.92229	2.77961	3.97405	0.342538	1.48523	0.290778	0.70618	0.675169		3.30989	4.1495	3.56873	0.765673	-0.0739354	0.506831	0.399523	0.429967		4.37903	4.88186	4.99231	0.151658	-0.351169	-0.461615	-0.220375	0.326889		3.46992	2.35397	3.60067	0.51036	1.62631	0.379612	0.838762	0.685166		0.70618	0.399523	-0.220375	0.838762	0.552852	0.309193
CCTCGGGAAGTCCACTTTAAT	39699	TRCN0000077405,TRCN0000331729	3.89832	3.38273	3.46162	4.12757		3.78717	2.9689	4.54937	0.111151	0.929422	-0.651051	0.129841	0.790402		3.50731	4.54276	3.29181	-0.124574	-1.16002	0.0909206	-0.397892	0.668762		3.95101	4.30748	2.46951	-0.489393	-0.845864	0.992104	-0.114384	0.974682		2.31378	3.90383	1.94394	1.81378	0.223739	2.18362	1.40705	1.04133		0.129841	-0.397892	-0.114384	1.40705	-0.134026	0.646332
GCCAAGATATTCTGGTTACAT	39699	TRCN0000077403,TRCN0000301425	4.17962	4.11178	4.55096	4.35449		3.5801	3.92317	4.1465	0.599522	0.256455	0.0331274	0.296368	0.285299		4.74795	4.78483	4.56069	-0.636168	-0.67305	-0.44891	-0.586043	0.120183		3.75931	3.84731	5.3289	0.791646	0.703646	-0.777943	0.239117	0.881898		4.22883	0.748219	5.91186	0.125666	3.60627	-1.55737	0.724856	2.63345		0.296368	-0.586043	0.239117	0.724856	-0.144837	0.481986
CCCATTATGAAGTTCATCAAT	39699	TRCN0000077404,TRCN0000301426	5.13261	4.94782	4.58172	5.0424		5.67598	5.27527	6.00644	-0.543378	-0.142664	-0.873832	-0.519958	0.366146		5.98247	6.26046	6.39337	-1.03465	-1.31265	-1.44556	-1.26429	0.209677		4.2263	4.42616	6.39494	0.355425	0.155565	-1.81322	-0.434076	1.19855		5.75426	7.11098	4.26264	-0.711854	-2.06858	0.779757	-0.666892	1.4247		-0.519958	-1.26429	-0.434076	-0.666892	-0.892122	-0.550484
GCACTATCGAAGTTGAGAATA	39699	TRCN0000077406,TRCN0000301353	4.7448	4.35279	4.677	3.69806		3.69057	3.99298	4.19396	1.05422	0.751817	0.550838	0.785627	0.253391		4.30395	4.35165	4.91422	0.0488466	0.00114612	-0.561422	-0.170476	0.339408		4.25917	4.72263	3.524	0.417831	-0.0456291	1.15299	0.508399	0.604422		3.43746	5.61736	2.96432	0.260599	-1.9193	0.733744	-0.308318	1.41506		0.785627	-0.170476	0.508399	-0.308318	0.307575	0.10004
CGACCATGAGTATCAAGTCAA	39699	TRCN0000077407,TRCN0000301427	3.74974	3.07555	3.4655	3.65906		4.26727	3.446	4.01358	-0.517528	0.303739	-0.263834	-0.159208	0.420512		4.31509	4.42177	3.90441	-1.23954	-1.34623	-0.828867	-1.13821	0.273159		5.17536	3.70848	3.85981	-1.70986	-0.242981	-0.394311	-0.782384	0.806774		4.61807	5.22754	5.09475	-0.959019	-1.56849	-1.4357	-1.32107	0.320496		-0.159208	-1.13821	-0.782384	-1.32107	-0.64871	-1.05173
CAAGGCAGATACAATTTCTAA	39700	TRCN0000175279,TRCN0000347505	4.03587	4.1702	3.85445	4.48289		4.4478	4.14792	4.78784	-0.411929	-0.112045	-0.751973	-0.425316	0.320174		3.95103	4.21268	3.72356	0.219168	-0.0424763	0.446645	0.207779	0.244759		3.0984	3.3477	3.30015	0.756049	0.506744	0.554296	0.605696	0.132362		2.57482	1.13061	0.971968	1.90807	3.35229	3.51092	2.92376	0.883182		-0.425316	0.207779	0.605696	2.92376	-0.108768	1.76473
GCAGACACATATGAGGCACTA	39700	TRCN0000194623,TRCN0000347587	3.77388	4.28568	4.97027	4.51819		3.7066	3.88255	4.73478	0.0672859	-0.108663	-0.960893	-0.33409	0.54991		2.93715	3.39254	4.2053	1.34853	0.893144	0.080379	0.774017	0.642413		2.96377	3.26519	2.36444	2.0065	1.70507	2.60582	2.1058	0.45851		3.46992	2.7965	2.47215	1.04827	1.72169	2.04604	1.60534	0.508962		-0.33409	0.774017	2.1058	1.60534	0.219963	1.85557
ACACGACCTCCAAGATCAATG	39700	TRCN0000347507	3.37454	2.07551	2.71983	2.92836		3.44144	2.97443	3.60786	-0.0669044	0.400105	-0.233326	0.0332916	0.328387		4.53107	3.22614	3.43691	-2.45556	-1.15062	-1.3614	-1.65586	0.700533		3.57077	1.93717	3.1711	-0.850944	0.782656	-0.451272	-0.173187	0.851564		1.15875	2.02103	0.289112	1.76961	0.907334	2.63925	1.77206	0.865961		0.0332916	-1.65586	-0.173187	1.77206	-0.811284	0.799439
GCCTTATCAGTAACTCAGTTA	39700	TRCN0000193552,TRCN0000347588	4.99415	4.79284	5.02133	5.0287		3.41828	3.67394	3.76499	1.57587	1.32021	1.22915	1.37508	0.179753		3.95103	4.25411	3.77168	0.841807	0.538729	1.02116	0.800565	0.243846		3.32546	3.01886	3.98324	1.69587	2.00247	1.0381	1.57881	0.492729		3.91452	5.08892	1.63596	1.11418	-0.0602213	3.39274	1.48223	1.75566		1.37508	0.800565	1.57881	1.48223	1.08782	1.53052
CTCCAAGATCAATGGAGCAAT	39700	TRCN0000176403	4.26726	4.61919	3.98475	3.18055		4.68949	4.05435	4.38689	-0.422226	0.212909	-0.119625	-0.109648	0.317685		4.17845	4.88598	5.14182	0.44074	-0.26679	-0.522633	-0.116227	0.499023		5.20551	4.52403	4.43848	-1.22076	-0.53928	-0.453731	-0.737923	0.42033		3.3276	6.53546	3.05056	-0.147053	-3.35491	0.129989	-1.12399	1.93699		-0.109648	-0.116227	-0.737923	-1.12399	-0.112938	-0.930958
CCACTTCTCAAGGATTCTGTT	39701	TRCN0000112988,TRCN0000326353	4.97642	4.51034	4.27123	3.73229		4.75875	4.9214	4.87012	0.217672	0.0550278	0.106307	0.126336	0.0831515		4.6785	4.46393	4.07233	-0.168163	0.0464053	0.438012	0.105418	0.307366		3.49213	2.31073	1.92143	0.779104	1.9605	2.3498	1.69647	0.81796		4.53358	1.29948	0.414495	-0.801289	2.43281	3.31779	1.64977	2.16831		0.126336	0.105418	1.69647	1.64977	0.115877	1.67312
GCACAAATTCAAGAGTAAGAT	39701	TRCN0000112986,TRCN0000326491	5.11921	5.16447	5.06682	5.0164		4.38546	3.9571	3.90668	0.733749	1.16211	1.21253	1.03613	0.263079		3.44276	4.04783	4.76767	1.72171	1.11664	0.396805	1.07838	0.663279		3.35383	3.89687	1.2198	1.71299	1.16995	3.84702	2.24332	1.41514		4.45467	3.09506	3.61381	0.561729	1.92134	1.4026	1.29522	0.686138		1.03613	1.07838	2.24332	1.29522	1.05726	1.76927
CGGATCTTTCTGTTTCAGATT	39701	TRCN0000112985,TRCN0000326430	3.05805	2.97426	3.7939	3.53097		3.24039	2.85353	3.7977	-0.18233	0.204523	-0.739648	-0.239152	0.474644		3.5266	2.70694	3.59906	-0.55234	0.26732	-0.624796	-0.303272	0.495474		3.57479	4.31661	3.33765	0.219112	-0.522709	0.456258	0.0508868	0.510704		4.92561	3.72998	3.10738	-1.39464	-0.199013	0.423586	-0.390023	0.924041		-0.239152	-0.303272	0.0508868	-0.390023	-0.271212	-0.169568
CAAACCAAGAAGGACAAGGAT	39701	TRCN0000112989,TRCN0000326352	3.73225	3.66052	4.04054	4.48289		4.86109	4.48483	4.63694	-1.12884	-0.75258	-0.90469	-0.928702	0.189274		5.27696	4.54079	4.38814	-1.61644	-0.880269	-0.727617	-1.07478	0.475265		4.39505	5.68273	5.24629	-0.354507	-1.64219	-1.20575	-1.06748	0.654884		6.60005	6.4211	4.69424	-2.11716	-1.93821	-0.211345	-1.42224	1.05248		-0.928702	-1.07478	-1.06748	-1.42224	-1.00174	-1.24486
CGGCTGAAGCTAACAATCGTT	39701	TRCN0000112987,TRCN0000326431	2.07391	2.09976	1.62322	2.21261		2.38947	2.00308	0.80588	-0.315559	0.0708355	1.26803	0.341103	0.825666		1.83353	2.69283	2.77672	0.266227	-0.593068	-0.676965	-0.334602	0.522021		2.46265	1.62058	0.749135	-0.839428	0.002634	0.874083	0.0124296	0.856797		2.28164	4.87834	3.26553	-0.0690278	-2.66574	-1.05293	-1.26256	1.31099		0.341103	-0.334602	0.0124296	-1.26256	0.00325035	-0.625067
CGAAGGTAAGTTTGGGAACAT	39702	TRCN0000101616	3.15578	3.63586	3.63731	2.56464		2.52577	3.00178	2.4484	0.630011	0.153994	0.70738	0.497128	0.29967		2.78525	1.9486	3.36814	0.850605	1.68725	0.267716	0.935191	0.713539		1.06687	2.67977	2.43533	2.57043	0.957531	1.20197	1.57665	0.86928		0.704888	2.56753	1.99837	1.85975	-0.00289565	0.566267	0.807707	0.954507		0.497128	0.935191	1.57665	0.807707	0.71616	1.19218
CTGACCATTGAAGAACGAGAT	39702	TRCN0000101618	3.72872	3.48753	3.78771	3.76572		4.16196	4.64779	3.88857	-0.433238	-0.919068	-0.159848	-0.504051	0.384532		3.05477	3.40557	3.20247	0.432759	0.0819591	0.285063	0.266594	0.176128		3.01795	3.46735	3.23707	0.769753	0.320353	0.550639	0.546915	0.224723		2.93664	3.75198	4.11958	0.829077	0.0137404	-0.353862	0.162985	0.605427		-0.504051	0.266594	0.546915	0.162985	-0.118729	0.35495
CAACAGTATGAGCAGTATCTA	39702	TRCN0000101619	4.55286	4.85114	4.26455	3.78759		2.99109	3.10123	4.20376	1.56177	1.45163	0.349104	1.12084	0.670604		3.47291	3.82335	3.8963	1.37823	1.02779	0.954843	1.12029	0.22634		2.7598	3.57784	1.04949	1.50475	0.686717	3.21506	1.80217	1.29015		2.58803	3.68112	2.75106	1.19956	0.106464	1.03653	0.780851	0.589697		1.12084	1.12029	1.80217	0.780851	1.12056	1.29151
GCCTGGAAATAGGATTTCCTT	39702	TRCN0000101615	3.36549	3.13542	3.54112	2.94143		3.04753	2.37347	2.06347	0.317953	0.992015	1.30202	0.870662	0.503131		2.50308	2.34129	2.04841	0.63234	0.794125	1.08701	0.837824	0.230461		2.84221	3.18766	2.34616	0.698912	0.353461	1.19496	0.749111	0.422989		2.73179	1.65128	1.41368	0.20964	1.29015	1.52774	1.00918	0.702538		0.870662	0.837824	0.749111	1.00918	0.854243	0.879145
GCTGAGGATCAAGGCTATGAA	39702	TRCN0000101617	3.93243	3.8864	3.63385	3.32709		3.55908	2.70169	2.82359	0.37335	1.23074	1.10884	0.904308	0.463845		4.22052	3.78727	3.22857	-0.334116	0.0991305	0.657839	0.140951	0.497298		4.63355	3.03001	2.56744	-0.999698	0.603844	1.06641	0.223519	1.08429		3.24247	1.7124	3.03762	0.0846198	1.61469	0.289473	0.662929	0.830593		0.904308	0.140951	0.223519	0.662929	0.522629	0.443224
CCCAGAAATGTGTCCTGAGAA	0610007C21Rik	TRCN0000124775	3.54454	2.90714	3.5739	3.84084		3.5905	4.40717	4.03842	-0.0459598	-0.862632	-0.493882	-0.467491	0.408975		4.12249	4.09688	3.81825	-1.21535	-1.18974	-0.911106	-1.1054	0.168749		2.14319	4.4049	4.279	1.43071	-0.831003	-0.705093	-0.0351279	1.27101		4.30877	2.09175	2.74311	-0.467923	1.74909	1.09773	0.792968	1.1395		-0.467491	-1.1054	-0.0351279	0.792968	-0.786445	0.37892
AGTGCGTTTGTGCTGATGGTT	0610007C21Rik	TRCN0000124778	2.20144	2.73205	2.96469	2.13513		3.47551	2.48622	4.17167	-1.27406	-0.284773	-1.97023	-1.17636	0.846966		3.34834	4.01134	3.39143	-0.616293	-1.27929	-0.659377	-0.851653	0.37097		4.2263	2.90236	3.35146	-1.26161	0.0623279	-0.386769	-0.528683	0.673281		1.12291	2.47356	1.81341	1.01222	-0.338422	0.32172	0.331841	0.675379		-1.17636	-0.851653	-0.528683	0.331841	-1.014	-0.0984213
GCAAATCCTCTCAAGGATGAT	0610007C21Rik	TRCN0000124777	4.01866	4.4361	3.54112	3.92874		4.03319	4.16737	3.51649	-0.014534	-0.148715	0.502162	0.112971	0.343662		3.41197	3.40124	4.00849	1.02412	1.03486	0.427607	0.828863	0.347539		3.19565	3.84099	1.47664	0.345479	-0.299869	2.06448	0.703363	1.22213		3.36644	1.77104	1.60121	0.562304	2.1577	2.32753	1.68251	0.973838		0.112971	0.828863	0.703363	1.68251	0.470917	1.19294
GCCAAGAAGATTTACTTCGTT	0610007C21Rik	TRCN0000124774	4.33141	4.11773	4.80829	4.11321		5.26004	4.52309	3.86716	-0.928633	-0.191675	0.464255	-0.218684	0.696836		4.45256	4.17764	5.15889	-0.334823	-0.0599056	-1.04115	-0.478628	0.506184		3.55049	4.95094	3.4186	1.25781	-0.14265	1.38969	0.83495	0.84919		4.52158	5.502	3.31997	-0.408373	-1.38879	0.793236	-0.334642	1.09288		-0.218684	-0.478628	0.83495	-0.334642	-0.348656	0.250154
ACTGCTTATGTTCTTTGGGAT	0610007C21Rik	TRCN0000124776	4.01866	3.68477	3.94633	2.63869		4.33687	4.29225	4.20131	-0.318215	-0.273594	-0.182659	-0.258156	0.0690843		5.16907	3.81685	3.21558	-1.48431	-0.132086	0.469191	-0.3824	1.00052		4.43543	3.32977	4.52837	-0.489101	0.616554	-0.582049	-0.151532	0.666804		4.34227	3.28309	4.78605	-1.70359	-0.6444	-2.14736	-1.49845	0.772195		-0.258156	-0.3824	-0.151532	-1.49845	-0.320278	-0.824991
CCCATTCATTATCTGAAAGAT	0610007P08Rik	TRCN0000176683	3.94463	3.58523	4.05093	4.45811		4.91173	3.82246	3.99113	-0.967097	0.122174	-0.0464955	-0.29714	0.586297		4.60099	4.01134	5.0509	-1.01576	-0.42611	-1.46567	-0.969181	0.521344		3.57077	4.7397	5.4202	0.480157	-0.688779	-1.36927	-0.525965	0.935403		6.10137	2.67892	2.89428	-1.64326	1.77919	1.56382	0.566586	1.91681		-0.29714	-0.969181	-0.525965	0.566586	-0.63316	0.0203104
GCATGTTATCATGGGTTCTTT	0610007P08Rik	TRCN0000177328	4.56872	3.94781	3.92954	3.63514		3.97087	3.58992	3.4726	0.59785	0.978795	1.09612	0.890921	0.260498		3.90017	2.74847	3.84098	0.0476376	1.19934	0.106823	0.451267	0.648526		3.54229	5.82394	2.19093	0.387247	-1.8944	1.7386	0.0771492	1.83625		1.24465	1.03813	2.73512	2.39049	2.59701	0.900015	1.9625	0.925917		0.890921	0.451267	0.0771492	1.9625	0.671094	1.01983
CCACTCAAATCAGAATGTGAT	0610007P08Rik	TRCN0000177526	3.49146	3.26972	3.15964	1.86042		3.49778	3.3974	3.98262	-0.00632105	0.0940558	-0.491158	-0.134474	0.312948		4.49969	3.5882	2.65372	-1.22997	-0.318473	0.616008	-0.310811	0.923011		5.3463	2.72163	3.40983	-2.18666	0.438004	-0.250193	-0.666283	1.3609		0.551556	3.52377	3.28208	1.30886	-1.66335	-1.42166	-0.592048	1.65067		-0.134474	-0.310811	-0.666283	-0.592048	-0.222642	-0.629166
CCCTCAAATGATAGTACTTTA	0610007P08Rik	TRCN0000176466	4.77758	4.75517	4.08164	4.29212		4.88099	4.37197	3.72474	-0.103416	0.405603	1.05284	0.451676	0.579502		5.49831	4.54865	4.30473	-0.74314	0.206523	0.450436	-0.0287271	0.630605		4.52962	4.06889	4.21496	-0.447981	0.0127541	-0.133316	-0.189514	0.235452		4.67178	5.32617	6.83074	-0.379654	-1.03405	-2.53861	-1.31744	1.10703		0.451676	-0.0287271	-0.189514	-1.31744	0.211474	-0.753476
CCCTCTATCCTTAAACCATTT	0610007P14Rik	TRCN0000125249	3.76703	3.15869	2.75836	4.13895		4.15263	3.3082	2.9099	-0.385607	0.458831	0.857125	0.310116	0.634573		3.73169	3.76384	4.06992	-0.573001	-0.605152	-0.911233	-0.696462	0.186691		2.57936	0.958419	2.46104	0.178996	1.79994	0.297318	0.758752	0.903635		2.09999	4.58955	3.18569	2.03897	-0.450596	0.95326	0.84721	1.24817		0.310116	-0.696462	0.758752	0.84721	-0.193173	0.802981
CTGGTTATGGTGTCCATTATA	0610007P14Rik	TRCN0000125252	1.70924	1.80756	1.93496	2.04118		1.04762	0.972863	0.522515	0.661616	0.736377	1.18673	0.861573	0.284061		1.29529	1.20345	0.417979	0.512276	0.604116	1.38958	0.835326	0.482194		0.845014	0.0879768	0	1.08995	1.84699	1.93496	1.62397	0.46456		0.524338	0	0.199029	1.51684	2.04118	1.84215	1.80006	0.264691		0.861573	0.835326	1.62397	1.80006	0.848449	1.71201
GCTCTACACTGGCAAGCCAAA	0610007P14Rik	TRCN0000125253	3.41457	3.1471	2.96469	3.44644		3.14953	3.32562	3.4315	0.265046	0.0889536	-0.0169305	0.112356	0.142438		3.19401	2.24786	2.71653	-0.0469082	0.899237	0.43057	0.427633	0.47308		2.51383	4.10624	3.41422	0.450862	-1.14155	-0.449534	-0.380073	0.798474		3.47349	1.06181	0.767778	-0.0270477	2.38463	2.67866	1.67875	1.48456		0.112356	0.427633	-0.380073	1.67875	0.269995	0.649337
CTCTCAGAGTTGTTTGTATTT	0610007P14Rik	TRCN0000125251	3.34261	3.29094	3.35669	3.55241		4.02554	3.2637	4.68843	-0.682933	0.0789128	-1.34582	-0.649947	0.71294		2.59733	3.27905	2.8955	0.693614	0.0118936	0.395435	0.366981	0.34175		4.37903	3.66624	3.39212	-1.02234	-0.309548	-0.0354316	-0.455775	0.509447		2.97233	4.93073	3.58297	0.58008	-1.37832	-0.0305625	-0.276266	1.00205		-0.649947	0.366981	-0.455775	-0.276266	-0.141483	-0.366021
CCCTGATGGTAGCAAGTTTCT	0610007P14Rik	TRCN0000125250	3.00076	3.01308	2.98108	3.58191		0.899358	1.57804	0.583815	2.1014	1.42272	2.41695	1.98036	0.508044		1.80221	1.83754	1.21177	1.21087	1.17554	1.80131	1.39591	0.351537		1.81621	2.86549	2.55953	1.16486	0.11558	0.421544	0.567328	0.539618		1.02921	2.90522	0.971968	2.5527	0.676689	2.60994	1.94644	1.10001		1.98036	1.39591	0.567328	1.94644	1.68813	1.25689
GAAGAGGACATCGATCCCTTT	0610007P22Rik	TRCN0000189975	2.68879	2.34263	2.15312	2.84044		1.72565	1.94789	1.31986	0.963139	0.740896	1.36893	1.02432	0.318455		3.82034	0.652603	1.92617	-1.47772	1.69002	0.416455	0.209588	1.59397		0	1.25298	0	2.15312	0.900137	2.15312	1.73546	0.723407		0	0	0.492412	2.84044	2.84044	2.34803	2.67631	0.284294		1.02432	0.209588	1.73546	2.67631	0.616954	2.20588
GCTGCCAACCCTGTAAACTAT	0610007P22Rik	TRCN0000190054	3.50388	3.37282	3.43014	3.30705		4.33481	4.58407	4.1541	-0.830928	-1.08019	-0.650214	-0.853778	0.215898		4.80239	3.48142	4.09614	-1.42957	-0.1086	-0.723326	-0.753832	0.661014		3.61441	3.05205	3.68175	-0.184278	0.378082	-0.251615	-0.0192705	0.34576		3.116	0.140069	2.60962	0.191052	3.16698	0.69743	1.35182	1.59223		-0.853778	-0.753832	-0.0192705	1.35182	-0.803805	0.666275
CACTGAAATTTGGAAAGGGAT	0610007P22Rik	TRCN0000191311	1.99396	2.65232	2.9919	3.2186		2.30779	3.15094	4.22796	-0.313834	-1.15699	-2.234	-1.23494	0.962456		4.24402	3.3661	3.75681	-1.5917	-0.713778	-1.10449	-1.13666	0.439843		3.12058	1.46498	3.02361	-0.128687	1.52691	-0.0317183	0.455503	0.929135		2.76705	5.84936	3.06975	0.451557	-2.63076	0.148855	-0.676782	1.69895		-1.23494	-1.13666	0.455503	-0.676782	-1.1858	-0.110639
GATTCTGAGGAGGACAGTGAT	0610007P22Rik	TRCN0000189800	2.61435	2.12361	1.97914	3.33206		1.50885	1.40855	1.90437	1.10549	1.2058	0.709981	1.00709	0.262148		0.506876	0.709783	2.71037	1.61673	1.41383	-0.586763	0.814598	1.21785		0.179783	0.249307	1.68007	1.79936	1.72983	0.299066	1.27609	0.846837		0.113936	2.45579	0.88797	3.21813	0.876271	2.44409	2.1795	1.19314		1.00709	0.814598	1.27609	2.1795	0.910845	1.72779
GCACTGAAGGAAGCTAAAGAT	0610008F07Rik	TRCN0000181540	3.99538	2.89334	3.88379	4.72686		2.45164	1.9591	3.67631	1.54374	2.03628	0.319073	1.2997	0.884231		2.46359	3.1864	2.274	0.429753	-0.293061	0.619338	0.25201	0.481469		1.04384	2.67977	1.50987	2.83995	1.20402	2.37392	2.1393	0.842827		1.38744	0.626462	1.12658	3.33942	4.1004	3.60028	3.68003	0.386705		1.2997	0.25201	2.1393	3.68003	0.775853	2.90966
GCAAACTGATGTGCAGACACA	0610008F07Rik	TRCN0000182351	4.33605	3.56795	4.72481	4.82351		5.25787	4.94131	4.91851	-0.921819	-0.60526	-0.582459	-0.703179	0.18969		4.9183	4.88753	4.33708	-1.35035	-1.31958	-0.769124	-1.14635	0.32705		3.05874	5.66138	4.28381	1.66607	-0.936575	0.441004	0.390167	1.30207		3.99851	4.41208	3.3827	0.825002	0.411436	1.44081	0.892417	0.517988		-0.703179	-1.14635	0.390167	0.892417	-0.924765	0.641292
GTTCTATACAACAGGCAATAA	0610008F07Rik	TRCN0000177223	5.1837	5.10881	4.91448	5.33497		2.68305	2.07695	3.06306	2.50065	3.10675	2.12064	2.57601	0.497356		1.42432	2.50369	3.27522	3.68449	2.60512	1.83359	2.70773	0.929706		2.97598	2.60719	1.27882	1.9385	2.30729	3.63566	2.62715	0.89265		1.62377	0.688625	1.10193	3.71119	4.64634	4.23303	4.19686	0.468623		2.57601	2.70773	2.62715	4.19686	2.64187	3.412
CTATACAACAGGCAATAAGTA	0610008F07Rik	TRCN0000176653	4.74305	4.63172	4.13143	4.64538		3.73187	3.81938	3.1966	1.01118	0.923668	1.54645	1.16043	0.337152		4.52629	2.79545	4.03338	0.105429	1.83627	0.598339	0.84668	0.891744		2.84221	2.49902	2.89748	1.28921	1.6324	1.23394	1.38519	0.215872		3.17407	2.26496	4.59618	1.47131	2.38042	0.0492027	1.30031	1.17498		1.16043	0.84668	1.38519	1.30031	1.00356	1.34275
CGTCTACGACTTATACATCAA	0610009B22Rik	TRCN0000108621,TRCN0000335100	3.88888	4.0067	3.78148	2.99879		3.52695	3.92317	4.10004	0.361929	-0.0342923	-0.211167	0.0388231	0.29346		4.18454	4.4303	5.0288	-0.177835	-0.423604	-1.0221	-0.541178	0.434237		3.00012	2.3289	3.78035	0.781367	1.45258	0.00113257	0.745027	0.726407		1.99485	0.0948736	3.60506	1.00394	2.90391	-0.606275	1.10053	1.75709		0.0388231	-0.541178	0.745027	1.10053	-0.251178	0.922777
GCACGAGGATGGCATCAAGAA	0610009B22Rik	TRCN0000108624,TRCN0000335176	2.65947	3.24819	3.05	3.59437		2.6569	2.0352	1.99742	0.00256945	0.624272	0.662055	0.429632	0.370329		1.59851	1.45827	0.835218	1.64968	1.78992	2.41297	1.95086	0.4063		0.582726	1.78754	1.70897	2.46728	1.26246	1.34103	1.69026	0.674066		0	1.95933	0.703706	3.59437	1.63504	2.89066	2.70669	0.992534		0.429632	1.95086	1.69026	2.70669	1.19024	2.19847
GCCACCATGATAATCCGGTTT	0610009B22Rik	TRCN0000108623	2.50322	2.40234	2.80205	1.91442		3.03743	2.51687	3.1107	-0.534217	-0.0136575	-0.60748	-0.385118	0.323773		3.77266	3.25043	2.43208	-1.37033	-0.848091	-0.0297452	-0.749388	0.67572		1.53165	2.622	2.83331	1.2704	0.180051	-0.0312521	0.473067	0.698548		0.149999	1.79949	5.17964	1.76442	0.114928	-3.26522	-0.461958	2.56397		-0.385118	-0.749388	0.473067	-0.461958	-0.567253	0.00555446
CATGTGGCTCTCCAACAACAT	0610009B22Rik	TRCN0000108622,TRCN0000335099	2.59124	1.65228	1.98998	2.30647		1.00679	1.05871	0.77992	1.58445	1.53253	1.81132	1.64277	0.148264		1.31761	1.22322	0.15318	0.334666	0.429057	1.4991	0.754273	0.64676		1.54811	0.249307	0	0.441861	1.74067	1.98998	1.39084	0.831236		0.496597	0	0	1.80987	2.30647	2.30647	2.14094	0.28671		1.64277	0.754273	1.39084	2.14094	1.19852	1.76589
GCAGTGGATGTATTGTAAATT	0610009B22Rik	TRCN0000108620,TRCN0000335101	4.36585	4.41693	4.71505	3.97712		4.81453	4.5079	4.38043	-0.448674	-0.142051	-0.0145718	-0.201765	0.223127		2.92992	3.68405	4.38427	1.487	0.732876	0.0326532	0.750843	0.72734		4.78012	5.83987	4.24487	-0.0650732	-1.12482	0.47018	-0.239905	0.811746		3.81975	3.58634	3.71071	0.157364	0.39078	0.266404	0.271516	0.116792		-0.201765	0.750843	-0.239905	0.271516	0.274539	0.0158055
CAGCAGAAGAAATGTATGATA	0610009D07Rik	TRCN0000123677,TRCN0000353926	3.33336	2.44081	3.95188	2.62256		1.67443	0.0842967	0	1.65893	3.24906	3.33336	2.74712	0.94334		0	0.466063	0	2.44081	1.97475	2.44081	2.28546	0.269081		0.0470894	0.861893	0	3.90479	3.08999	3.95188	3.64888	0.484593		0	0.657878	0	2.62256	1.96468	2.62256	2.40327	0.379826		2.74712	2.28546	3.64888	2.40327	2.51629	3.02607
CCTGTTCTCTTCTCTTCCTTT	0610009D07Rik	TRCN0000123674,TRCN0000324321	3.31467	3.01308	3.47325	3.25044		0	0	0.0442899	3.31467	3.31467	3.27038	3.29991	0.0255708		0.618971	0	0	2.39411	3.01308	3.01308	2.80676	0.357363		0	0	0	3.47325	3.47325	3.47325	3.47325	0		0	0	0	3.25044	3.25044	3.25044	3.25044	0		3.29991	2.80676	3.47325	3.25044	3.05333	3.36184
AGCTGAAACTTCTCAAGGAAA	0610009D07Rik	TRCN0000123678,TRCN0000324322	3.94767	3.1471	2.99728	3.85472		0.365594	0	0	3.58207	3.94767	3.94767	3.8258	0.211076		1.68691	0.0888957	0.0786222	1.46019	3.05821	3.06848	2.52896	0.925593		0	0	1.49335	2.99728	2.99728	1.50392	2.49949	0.862187		0.0389869	0	0	3.81573	3.85472	3.85472	3.84172	0.0225091		3.8258	2.52896	2.49949	3.84172	3.17738	3.17061
CCACCTGAAGTAAATCGGATT	0610009D07Rik	TRCN0000123675,TRCN0000324320	2.94718	2.96108	2.79589	2.90188		1.60773	0.595935	0	1.33944	2.35124	2.94718	2.21262	0.812781		0.788376	1.26197	0	2.17271	1.69912	2.96108	2.27764	0.637494		0.136894	1.00436	2.0399	2.659	1.79153	0.755998	1.73551	0.952737		0	0.226422	0.703706	2.90188	2.67545	2.19817	2.59183	0.359228		2.21262	2.27764	1.73551	2.59183	2.24513	2.16367
CGACCACCTATCAGGATTCAA	0610009D07Rik	TRCN0000123676,TRCN0000324250	2.01726	2.05085	2.20053	1.70058		0	0	0	2.01726	2.01726	2.01726	2.01726	0		0.298212	0.0451324	0	1.75264	2.00572	2.05085	1.9364	0.160736		1.19784	0.394397	0	1.00269	1.80614	2.20053	1.66979	0.610449		0	0	0	1.70058	1.70058	1.70058	1.70058	0		2.01726	1.9364	1.66979	1.70058	1.97683	1.68518
CAACTCTTTCAGCTCAGTGTA	0610009O20Rik	TRCN0000179419	3.6748	3.17018	3.46162	3.87529		2.34921	2.82319	2.01977	1.32559	0.851609	1.65503	1.27741	0.403869		2.37056	1.73109	1.65826	0.799622	1.4391	1.51193	1.25022	0.39192		2.00692	1.39772	0	1.45469	2.0639	3.46162	2.32674	1.02895		0.0769479	0.777118	1.37306	3.79834	3.09817	2.50222	3.13291	0.648755		1.27741	1.25022	2.32674	3.13291	1.26381	2.72982
GCAGCCATTTCACCATAGAAA	0610009O20Rik	TRCN0000179498	4.34988	4.12956	4.57814	4.03919		5.10547	4.98582	4.82164	-0.755583	-0.635941	-0.471754	-0.621092	0.142496		3.40156	4.01418	4.63737	0.727997	0.115378	-0.507812	0.111854	0.617912		3.78036	4.90627	4.73918	0.797774	-0.328129	-0.161046	0.102866	0.607579		4.47614	2.23403	3.59185	-0.436948	1.80516	0.447343	0.605186	1.12936		-0.621092	0.111854	0.102866	0.605186	-0.254619	0.354026
GCTGTGACTTCCATTCAGCAA	0610009O20Rik	TRCN0000184274	4.41493	4.11773	4.01424	4.1891		1.46431	2.09738	0.929101	2.95062	2.31755	3.48583	2.918	0.584821		3.75641	2.43753	1.21177	0.36132	1.68021	2.90597	1.64916	1.27261		1.99496	3.22695	0.133899	2.01928	0.787296	3.88034	2.22897	1.55715		3.2172	0.0482165	1.91594	0.971901	4.14089	2.27316	2.46198	1.59291		2.918	1.64916	2.22897	2.46198	2.28358	2.34548
GCCTGAGAGTTCTCAGAGATA	0610009O20Rik	TRCN0000184297	3.9836	4.07556	3.5918	3.98345		2.11955	2.73467	2.74526	1.86405	1.24893	1.23833	1.45044	0.358237		2.68579	2.76205	2.57454	1.38977	1.31352	1.50102	1.40144	0.0942965		3.41793	2.86549	4.27417	0.173862	0.726301	-0.682374	0.0725964	0.709776		0.969914	3.85384	2.01166	3.01353	0.129607	1.97178	1.70497	1.46036		1.45044	1.40144	0.0725964	1.70497	1.42594	0.888785
GCAGATTCCACTTGGGAATTT	0610009O20Rik	TRCN0000179622	5.19651	5.00028	4.96478	3.64715		2.84238	3.57543	3.09499	2.35414	1.62108	2.10152	2.02558	0.372381		3.25311	1.9838	3.37205	1.74717	3.01648	1.62823	2.13063	0.769472		1.29857	3.3477	3.44461	3.66621	1.61708	1.52017	2.26782	1.21201		3.48412	2.33466	3.3827	0.163025	1.31248	0.264445	0.579985	0.636387		2.02558	2.13063	2.26782	0.579985	2.0781	1.4239
GCGAACACATACAGGAGAGAA	0610010B08Rik	TRCN0000202246	4.01577	3.90028	4.02482	4.59046		3.58704	5.26176	4.23514	0.428722	-1.24599	-0.219377	-0.345549	0.844456		2.69435	2.47923	4.86099	1.20593	1.42104	-0.960713	0.55542	1.31741		2.28744	2.96179	0.439997	1.73738	1.06303	3.58482	2.12841	1.30558		3.15645	1.68216	1.88738	1.43401	2.9083	2.70308	2.34847	0.798557		-0.345549	0.55542	2.12841	2.34847	0.104935	2.23844
CGAACACATACAGGAGAGAAA	0610010B08Rik	TRCN0000190377	3.93549	3.61077	3.80007	2.8749		4.52393	3.48916	2.90391	-0.58844	0.446325	1.03158	0.296488	0.820338		3.7023	4.30138	2.89007	-0.0915338	-0.690615	0.720701	-0.0204824	0.708335		1.81621	4.12715	1.57411	1.98386	-0.32708	2.22596	1.29425	1.40932		0.219528	1.46846	1.43357	2.65537	1.40643	1.44133	1.83438	0.711214		0.296488	-0.0204824	1.29425	1.83438	0.138003	1.56431
CCGGAGAGAAACCCTATGAAT	0610010B08Rik	TRCN0000086605	1.65085	1.74744	1.79369	1.33531		1.2881	1.34162	2.66952	0.362749	0.309228	-1.01868	-0.115566	0.782573		1.96662	1.71721	1.75719	-0.219182	0.0302258	-0.00974855	-0.0662351	0.133956		0.705217	0.758443	0.256419	1.08848	1.03525	1.53727	1.22033	0.275766		0	0.0482165	0	1.33531	1.28709	1.33531	1.31923	0.0278378		-0.115566	-0.0662351	1.22033	1.31923	-0.0909007	1.26978
GCACATATAGTTGAGAGAAAT	0610010B08Rik	TRCN0000200786	4.88755	5.20974	4.89732	4.82528		4.32446	4.28559	3.84854	0.563089	0.601965	1.03901	0.734688	0.264266		3.92945	4.23962	4.71018	1.28028	0.970115	0.499561	0.916653	0.393098		1.5964	2.97338	2.29942	3.30092	1.92393	2.59789	2.60758	0.688542		3.71531	4.70684	2.9981	1.10996	0.118436	1.82717	1.01852	0.858031		0.734688	0.916653	2.60758	1.01852	0.825671	1.81305
CCAGCCAAGAAACTCAACTTT	0610010K14Rik	TRCN0000123986,TRCN0000323551	1.9462	2.36281	2.50246	3.01741		1.68741	1.72969	1.2075	0.25879	0.216502	0.738696	0.404663	0.290053		1.59851	1.92465	0.965067	0.764293	0.438153	1.39774	0.866728	0.487925		0.92282	1.64979	2.2803	1.57964	0.852676	0.222166	0.884828	0.679309		0.524338	1.37703	1.02537	2.49307	1.64038	1.99205	2.04183	0.428522		0.404663	0.866728	0.884828	2.04183	0.635696	1.46333
CCAGCTGAGTCACCCAAGAAA	0610010K14Rik	TRCN0000123988,TRCN0000323619	1.27905	0.514661	1.14968	1.3935		1.30504	0.833675	1.06429	-0.02599	0.445371	0.214756	0.211379	0.235699		0.996403	0.989222	1.04556	-0.481742	-0.474561	-0.530903	-0.495735	0.0306667		1.3179	1.8643	0.633302	-0.168221	-0.714617	0.516376	-0.122154	0.616788		0.551556	0.0948736	0.414495	0.841942	1.29862	0.979004	1.03986	0.234344		0.211379	-0.495735	-0.122154	1.03986	-0.142178	0.458852
CCACCTCTGACCCTCATTGTT	0610010K14Rik	TRCN0000123984,TRCN0000323550	2.64459	2.40234	2.20983	2.234		2.01018	2.78591	2.14708	0.634407	-0.141327	0.497507	0.330196	0.414048		1.78629	2.80859	3.72049	0.616041	-0.406259	-1.31816	-0.369459	0.967625		2.19638	2.13601	1.958	0.0134539	0.0738222	0.251831	0.113036	0.123932		2.77284	0.226422	1.35232	-0.538841	2.00758	0.881684	0.783474	1.27605		0.330196	-0.369459	0.113036	0.783474	-0.0196318	0.448255
CCCAAGAAGATGACGTCCGGT	0610010K14Rik	TRCN0000123987,TRCN0000323553	3.18693	3.7475	2.68023	3.6551		3.97087	3.15094	3.98262	-0.783934	0.0359892	-0.795681	-0.514542	0.47681		4.27001	3.99706	3.05471	-0.522505	-0.249551	0.692798	-0.0264194	0.637637		5.7186	4.60081	4.26933	-3.03837	-1.92058	-1.58909	-2.18268	0.759358		4.36929	0.88725	3.24317	-0.714198	2.76785	0.411926	0.821858	1.77685		-0.514542	-0.0264194	-2.18268	0.821858	-0.270481	-0.680411
CCCATAAAGAAACAGAAGGCT	0610010K14Rik	TRCN0000123985,TRCN0000323622	2.87886	2.65232	1.348	1.57209		1.98937	2.56901	2.9099	0.889487	0.309853	-0.0310441	0.389432	0.465397		2.84025	3.45658	1.40723	-0.187932	-0.804254	1.2451	0.0843032	1.05145		1.54811	1.17477	3.6781	-0.200111	0.173233	-2.3301	-0.785658	1.35049		2.56149	0.422081	1.24386	-0.989404	1.15001	0.328233	0.162946	1.07924		0.389432	0.0843032	-0.785658	0.162946	0.236868	-0.311356
CCCTCAGTCCTTGGGATAAAT	0610011F06Rik	TRCN0000346059	2.70323	2.44081	3.36087	2.57306		2.19418	1.9366	1.35545	0.509046	0.766629	1.34778	0.874484	0.429641		2.43324	1.83754	1.99873	0.00757198	0.603268	0.442079	0.350973	0.308121		2.41856	3.37419	0.295051	0.942308	-0.0133241	3.06582	1.3316	1.57605		0.0389869	1.58745	0	2.53407	0.985611	2.57306	2.03091	0.905468		0.874484	0.350973	1.3316	2.03091	0.612728	1.68126
ACCTGTTGCTCTGCATCAATA	0610011F06Rik	TRCN0000345977	2.93499	3.34266	3.58109	3.15274		2.7952	3.75333	2.99134	0.13979	-0.818338	-0.0563493	-0.244965	0.506147		2.28252	1.96043	0.387418	1.06014	1.38222	2.95524	1.7992	1.01403		0.261916	2.051	0	3.31917	1.53009	3.58109	2.81011	1.11624		3.98609	2.80354	1.22115	-0.833358	0.349195	1.93158	0.482474	1.38728		-0.244965	1.7992	2.81011	0.482474	0.777117	1.64629
CAATGTGAAGGCTCCGCTGTA	0610011F06Rik	TRCN0000346013	3.58798	3.29094	3.59889	3.80913		2.17588	2.87144	0.856438	1.4121	0.716548	2.73155	1.62007	1.02347		2.84025	1.60112	2.82313	0.450685	1.68982	0.467805	0.869437	0.710525		2.45394	2.5771	3.46169	1.14496	1.02179	0.137198	0.76798	0.549734		0.219528	3.18945	0.453979	3.5896	0.619676	3.35515	2.52147	1.65117		1.62007	0.869437	0.76798	2.52147	1.24475	1.64473
ATGCCGTCAATGGGAAGATCT	0610011F06Rik	TRCN0000283465	0.0906555	0	0	0		0	0	0.0442899	0.0906555	0.0906555	0.0463656	0.0758922	0.0255708		0.0541816	0	0	-0.0541816	0	0	-0.0180605	0.0312818		0	0	0.256419	0	0	-0.256419	-0.0854729	0.148043		0	0.0482165	0	0	-0.0482165	0	-0.0160722	0.0278378		0.0758922	-0.0180605	-0.0854729	-0.0160722	0.0289158	-0.0507725
TGTCCGTACTCCGCCAGTATG	0610011F06Rik	TRCN0000345988	2.92271	2.58521	1.81822	2.88845		1.08733	2.09738	1.56757	1.83537	0.825329	1.35513	1.33861	0.505226		2.03558	0.989222	1.19422	0.549629	1.59598	1.39099	1.17887	0.554492		0.448861	1.8643	1.65058	1.36936	-0.0460754	0.167636	0.496973	0.763027		0.349276	4.33157	1.30991	2.53917	-1.44312	1.57854	0.891533	2.07814		1.33861	1.17887	0.496973	0.891533	1.25874	0.694253
GCTCTACATTAACCTCAAGTT	0610011L14Rik	TRCN0000177199	3.89832	4.33247	4.1142	4.28957		3.43761	3.07572	3.66925	0.460714	0.822601	0.229069	0.504128	0.299138		2.31617	2.85369	3.39527	2.01631	1.47879	0.9372	1.47743	0.539554		2.52218	1.2144	0.0460276	1.59201	2.89979	4.06817	2.85332	1.23873		0.0389869	0	0.767778	4.25058	4.28957	3.52179	4.02065	0.432462		0.504128	1.47743	2.85332	4.02065	0.990779	3.43699
CCCAACAAATGAATTTCTGAT	0610011L14Rik	TRCN0000177626	5.01744	4.36785	4.93985	4.76041		4.83216	5.31179	5.60211	0.185282	-0.294345	-0.584662	-0.231242	0.388831		4.85866	5.04857	4.9209	-0.49081	-0.680721	-0.553051	-0.574861	0.096816		3.75931	5.95548	4.24487	1.18054	-1.01563	0.694985	0.286634	1.15363		4.13972	1.921	6.10716	0.620699	2.83942	-1.34674	0.704458	2.09434		-0.231242	-0.574861	0.286634	0.704458	-0.403051	0.495546
GACAGAGTTTGGCATTGACTA	0610011L14Rik	TRCN0000178445	3.9747	4.03841	4.67532	4.14743		2.99109	3.37666	1.45724	0.983611	0.59804	2.51746	1.36637	1.01534		0.342429	2.37703	1.89392	3.69598	1.66137	2.14449	2.50061	1.06303		2.89465	2.60719	1.94591	1.78068	2.06813	2.72941	2.19274	0.486487		1.50349	0.307896	1.07686	2.64395	3.83954	3.07057	3.18469	0.605909		1.36637	2.50061	2.19274	3.18469	1.93349	2.68871
GATCTCACTCACCAACTTCAT	0610011L14Rik	TRCN0000178019	3.23741	4.16446	3.0186	2.97357		1.95759	1.99221	0	1.27982	1.2452	3.23741	1.92081	1.14034		0.298212	1.67477	2.54715	3.86625	2.4897	1.61731	2.65776	1.13385		1.61215	3.11623	1.81911	1.40645	-0.0976299	1.19949	0.836105	0.815233		0.149999	2.41959	0.151786	2.82358	0.553983	2.82179	2.06645	1.30983		1.92081	2.65776	0.836105	2.06645	2.28928	1.45128
GTTCAAGGACACTTTCACCGA	0610012G03Rik	TRCN0000182635	3.3005	3.34266	2.8143	3.25044		2.33278	1.57804	2.03082	0.967714	1.72246	1.26968	1.31995	0.379876		1.86419	2.15827	2.43955	1.47847	1.18439	0.903108	1.18865	0.287704		0.0926903	0.249307	0	2.72161	2.56499	2.8143	2.7003	0.126012		2.04359	0.422081	1.5656	1.20685	2.82836	1.68484	1.90668	0.833207		1.31995	1.18865	2.7003	1.90668	1.2543	2.30349
CCTAACTCGGATTGTCCTACA	0610012G03Rik	TRCN0000182780	3.68938	3.90716	3.56668	4.10453		3.02726	3.82858	2.70444	0.662114	-0.139203	0.984933	0.502615	0.578792		1.96662	3.01551	2.33932	1.94054	0.891654	1.56784	1.46668	0.531711		4.3698	2.51498	1.87117	-0.803119	1.0517	1.69551	0.648031	1.2973		0.865336	1.27942	1.02537	3.23919	2.82511	3.07916	3.04782	0.208812		0.502615	1.46668	0.648031	3.04782	0.984646	1.84793
CCACTTTCCAAGTAGCCCAAA	0610012G03Rik	TRCN0000200037	4.33141	3.81497	4.17243	4.68669		4.8668	4.76417	4.92593	-0.535389	-0.432759	-0.594516	-0.520888	0.0818478		5.41147	4.82097	5.03866	-1.5965	-1.006	-1.22369	-1.2754	0.298626		4.06121	5.07454	4.00379	0.111226	-0.902111	0.168641	-0.207414	0.602309		3.58965	3.79147	6.98863	1.09705	0.895227	-2.30194	-0.103221	1.90682		-0.520888	-1.2754	-0.207414	-0.103221	-0.898142	-0.155318
GCTGGAGTTATCACACAGAAA	0610012G03Rik	TRCN0000198344	4.27211	3.91402	3.63385	2.9608		3.30074	3.00719	3.44396	0.97137	1.26492	0.828159	1.02148	0.222652		1.83353	2.23818	3.01027	2.08048	1.67584	0.903749	1.55336	0.597853		2.30691	3.05205	0.474067	1.32694	0.581802	3.15979	1.68951	1.32669		0.75258	0.5615	2.87986	2.20822	2.3993	0.0809405	1.56282	1.2869		1.02148	1.55336	1.68951	1.56282	1.28742	1.62617
GTCAATCACCATGATCTCATT	0610012H03Rik	TRCN0000178448	4.44745	5.17021	4.74254	4.53337		3.98932	4.02799	4.12861	0.458128	0.419462	0.318844	0.398812	0.0719019		4.68924	4.42177	3.93379	0.480969	0.748436	1.23642	0.821941	0.383051		3.37705	2.051	2.91619	1.36549	2.69154	1.82635	1.96112	0.673222		1.43206	0.688625	0.703706	3.10132	3.84475	3.82967	3.59191	0.424934		0.398812	0.821941	1.96112	3.59191	0.610376	2.77652
GCCTTTGAAATGGTTGTCAAT	0610012H03Rik	TRCN0000178270	3.05805	3.11177	4.15328	3.61489		3.73187	4.33158	4.23036	-0.673817	-1.27353	-1.1723	-1.03988	0.321037		4.96678	5.03745	5.38262	-1.85501	-1.92568	-2.27085	-2.01718	0.222509		3.67563	3.87848	3.72484	0.477651	0.274796	0.428444	0.393631	0.105814		4.05428	4.26427	3.22617	-0.43939	-0.649375	0.388728	-0.233346	0.548867		-1.03988	-2.01718	0.393631	-0.233346	-1.52853	0.0801425
CCATGATCTCATTGATGGTTT	0610012H03Rik	TRCN0000178502	3.71097	3.47831	3.74677	3.73978		3.17739	3.66712	4.57413	0.533582	0.0438499	-0.863157	-0.0952418	0.708682		2.56036	4.08072	3.8963	0.917951	-0.602405	-0.417983	-0.0341455	0.82968		3.86164	2.90236	5.06955	-0.11487	0.844405	-1.32278	-0.197748	1.08597		1.5979	0.422081	1.99837	2.14189	3.3177	1.74141	2.40034	0.81931		-0.0952418	-0.0341455	-0.197748	2.40034	-0.0646937	1.10129
CCCTAAATTAGCACAGTTTGA	0610012H03Rik	TRCN0000178582	4.26726	4.00027	4.2511	4.25859		3.735	3.32128	4.05746	0.532264	0.945981	0.209805	0.562683	0.369029		3.02116	2.98688	3.60902	0.979111	1.01339	0.39125	0.794585	0.349719		3.10398	2.39937	3.59926	1.14713	1.85173	0.651849	1.2169	0.602976		2.01454	4.91618	1.02537	2.24405	-0.657591	3.23323	1.60656	2.02223		0.562683	0.794585	1.2169	1.60656	0.678634	1.41173
CCAATATCTTATCAGCAGGTT	0610012H03Rik	TRCN0000177861	3.07481	3.30143	3.30556	2.75424		4.44589	2.84751	4.83903	-1.37108	0.227295	-1.76422	-0.969335	1.05479		4.06097	4.22988	4.09141	-0.759539	-0.92845	-0.78998	-0.82599	0.0900293		4.00567	4.83813	3.18659	-0.700109	-1.53257	0.118969	-0.70457	0.825778		3.12508	2.76799	2.53794	-0.370848	-0.013755	0.216301	-0.0561007	0.295856		-0.969335	-0.82599	-0.70457	-0.0561007	-0.897663	-0.380335
CATTCATCTAACCTAACATTC	0610030E20Rik	TRCN0000341559	3.12929	3.89336	4.07657	4.08994		2.05092	3.51976	1.37292	1.07837	-0.390468	1.75637	0.814757	1.09743		2.31617	2.0068	1.7809	1.57719	1.88656	2.11246	1.85874	0.268719		0.675555	0	0	3.40101	4.07657	4.07657	3.85138	0.390032		3.1958	1.46846	0.88797	0.894139	2.62147	3.20196	2.23919	1.20047		0.814757	1.85874	3.85138	2.23919	1.33675	3.04529
CTGTGAGGAAGCCAGTGAAAG	0610030E20Rik	TRCN0000341624	0.882135	1.19281	1.84234	1.73099		0.194347	0.202169	0.128988	0.687788	0.679965	0.753147	0.706967	0.0401838		0.0541816	0.989222	0.116383	1.13863	0.203588	1.07643	0.806214	0.522816		0	0	0	1.84234	1.84234	1.84234	1.84234	2.71948e-16		0	0.267734	0.244773	1.73099	1.46326	1.48622	1.56015	0.148393		0.706967	0.806214	1.84234	1.56015	0.75659	1.70125
GCTCTTCTGTTTAGACTATGA	0610030E20Rik	TRCN0000341558	3.508	3.01308	2.84446	2.81228		0.783272	3.01258	2.23569	2.72473	0.49542	1.27231	1.49749	1.13158		2.76102	2.32309	0.857688	0.252057	0.689995	2.15539	1.03248	0.996817		0.339625	3.09515	0	2.50484	-0.250689	2.84446	1.69954	1.69746		1.00971	0.226422	2.07635	1.80256	2.58585	0.73593	1.70812	0.928572		1.49749	1.03248	1.69954	1.70812	1.26498	1.70383
ATCGGGACGACTACGACAAGA	0610030E20Rik	TRCN0000341556	0.0906555	0	0.0422563	0.0965863		0	0.0427639	0	0.0906555	0.0478916	0.0906555	0.0764008	0.0246898		0	0.0451324	0	0	-0.0451324	0	-0.0150441	0.0260572		0	0	0.0460276	0.0422563	0.0422563	-0.00377127	0.0269138	0.0265741		0	0	0	0.0965863	0.0965863	0.0965863	0.0965863	1.69967e-17		0.0764008	-0.0150441	0.0269138	0.0965863	0.0306784	0.06175
GGCGAGGTCACTTCAGTTATT	0610030E20Rik	TRCN0000341557	1.45998	1.94775	1.65079	0.501253		1.32178	1.70328	1.14786	0.138206	-0.243295	0.312129	0.0690134	0.284103		1.31761	1.1834	0.258256	0.630139	0.764348	1.68949	1.02799	0.576793		0.845014	0.323675	0	0.805778	1.32712	1.65079	1.26123	0.426343		2.97233	1.46846	0.492412	-2.47108	-0.967209	0.00884138	-1.14315	1.24929		0.0690134	1.02799	1.26123	-1.14315	0.548503	0.0590402
GAAGATGACACTGTCAGACTA	0610040J01Rik	TRCN0000180446	3.32871	3.40236	2.82644	3.58191		3.18656	3.32562	3.33675	0.14215	0.00309077	-0.00803669	0.0457348	0.0836835		3.82425	3.03801	3.94957	-0.421882	0.364352	-0.547204	-0.201578	0.494099		1.82974	5.04462	2.96492	0.996698	-2.21818	-0.138483	-0.453322	1.6304		0.113936	0.657878	0.798778	3.46797	2.92403	2.78313	3.05838	0.361648		0.0457348	-0.201578	-0.453322	3.05838	-0.0779215	1.30253
GCCATTCTGTTTGAATGTATT	0610040J01Rik	TRCN0000183487	4.17962	4.66866	4.30416	4.74746		5.13655	5.57569	5.27393	-0.956927	-1.39607	-1.09431	-1.1491	0.224639		5.12545	4.94967	5.18689	-0.456793	-0.281015	-0.518227	-0.418678	0.123114		5.38919	5.41578	4.71446	-1.08502	-1.11161	-0.410294	-0.868977	0.397453		2.70779	3.39452	6.31175	2.03967	1.35294	-1.56429	0.609437	1.91356		-1.1491	-0.418678	-0.868977	0.609437	-0.783889	-0.12977
GCAGATCACATCCCATACATA	0610040J01Rik	TRCN0000180520	3.31937	3.259	3.36504	2.90854		3.27518	0.904947	1.86786	0.044182	2.41442	1.4515	1.30337	1.19204		2.65105	3.10881	2.66012	0.607943	0.150189	0.598875	0.452336	0.261706		2.70213	2.1565	1.72321	0.662907	1.20854	1.64183	1.17109	0.490533		1.87067	0.422081	1.79815	1.03787	2.48646	1.11039	1.54491	0.816217		1.30337	0.452336	1.17109	1.54491	0.877852	1.358
GCAGACTTGAACTGTGAACAA	0610040J01Rik	TRCN0000180598	3.87937	4.48294	4.22612	4.34715		1.8578	2.15699	3.5629	2.02157	1.72239	0.316471	1.35348	0.910447		2.15196	2.56695	1.04556	2.33099	1.91599	3.43738	2.56145	0.786443		1.77485	1.67841	4.23745	2.45127	2.54771	-0.01133	1.66255	1.45042		1.22787	3.28812	1.43357	3.11928	1.05903	2.91358	2.36396	1.13477		1.35348	2.56145	1.66255	2.36396	1.95746	2.01326
TACCACCTTCTGCTGTCCTTG	0910001L09Rik	TRCN0000267860	2.2806	2.19287	2.80819	2.53047		2.31617	1.32439	1.8923	-0.0355677	0.956212	0.388301	0.436315	0.49763		1.95243	1.79854	2.10586	0.240447	0.394336	0.0870161	0.2406	0.15366		1.08954	2.76231	2.4863	1.71865	0.0458775	0.321888	0.695471	0.896779		0	0	0.736097	2.53047	2.53047	1.79437	2.2851	0.424986		0.436315	0.2406	0.695471	2.2851	0.338458	1.49029
TTGCACCATGGCACGAACATC	0910001L09Rik	TRCN0000283557	1.73757	3.46904	2.64639	1.35497		1.82294	2.15699	1.48963	-0.0853694	-0.419411	0.24794	-0.0856135	0.333675		2.32721	2.81512	1.37643	1.14182	0.653912	2.0926	1.29611	0.731649		0	1.25298	0	2.64639	1.39341	2.64639	2.22873	0.723407		0	0	0.289112	1.35497	1.35497	1.06585	1.25859	0.166919		-0.0856135	1.29611	2.22873	1.25859	0.605249	1.74366
TGTCAGGACAGAGGGTGTTTG	0910001L09Rik	TRCN0000267821	2.46983	1.65228	1.55188	2.28613		2.17588	0.927943	2.03082	0.293943	1.54188	0.439006	0.758277	0.682488		1.8942	0.868864	0.189063	-0.241928	0.783412	1.46321	0.668232	0.858386		0.221434	0.526219	0	1.33045	1.02566	1.55188	1.30267	0.264207		0	1.82739	0	2.28613	0.458742	2.28613	1.677	1.05504		0.758277	0.668232	1.30267	1.677	0.713255	1.48983
TATTGATGTCTGAGCTATAAA	0910001L09Rik	TRCN0000267812	3.72872	3.29094	4.15809	3.86846		2.11955	2.00308	2.19698	1.60918	1.72565	1.53175	1.62219	0.097604		3.24731	2.89742	2.01881	0.0436297	0.393523	1.27213	0.569761	0.632928		3.137	2.66555	4.50591	1.02109	1.49254	-0.347816	0.72194	0.955955		0	2.67124	0.858848	3.86846	1.19722	3.00962	2.69177	1.36369		1.62219	0.569761	0.72194	2.69177	1.09598	1.70685
CACATCATGGCTATTCTGCAT	1110002B05Rik	TRCN0000176265	3.12929	3.82954	4.04314	4.23757		3.61108	2.95217	2.86739	-0.48179	0.177119	0.261897	-0.0142581	0.407108		3.97581	3.73659	4.76321	-0.146267	0.0929565	-0.93367	-0.328993	0.537152		4.18216	3.3477	3.31902	-0.139012	0.695439	0.724123	0.42685	0.49026		2.80712	2.39183	3.73496	1.43044	1.84573	0.502609	1.2596	0.687668		-0.0142581	-0.328993	0.42685	1.2596	-0.171626	0.843222
CCCTAGACTCTTAACAGCTTT	1110002B05Rik	TRCN0000175376	3.41895	3.67673	3.78771	4.28189		2.99631	3.33425	3.24485	0.422643	0.0847014	0.174107	0.22715	0.175104		3.71917	3.4313	3.0644	-0.0424369	0.24543	0.612332	0.271775	0.328178		2.45394	2.60719	2.2803	1.33377	1.18052	1.50741	1.34057	0.163554		4.99788	2.77517	2.64417	-0.715994	1.50672	1.63772	0.809481	1.32272		0.22715	0.271775	1.34057	0.809481	0.249463	1.07502
CCTTTGTGACTGTTTCAATAT	1110002B05Rik	TRCN0000174377	2.16017	2.56793	3.23899	3.34687		1.97885	0.566928	1.04262	0.181318	1.59324	1.11755	0.964038	0.718372		0.850935	2.65693	1.22911	1.71699	-0.0890048	1.33882	0.988936	0.952482		2.3451	3.30245	1.65058	0.893895	-0.0634558	1.58841	0.806282	0.82941		1.14094	0.226422	2.50071	2.20592	3.12044	0.846153	2.05751	1.14439		0.964038	0.988936	0.806282	2.05751	0.976487	1.43189
GTGTTCAATTCGATGCTGGTT	1110002B05Rik	TRCN0000175927	3.64519	3.76277	4.01689	2.75424		3.17278	3.72735	3.40627	0.472407	-0.0821586	0.238919	0.209723	0.278433		3.50244	2.98109	3.05956	0.260327	0.781686	0.703211	0.581741	0.281105		4.2864	3.29322	2.90374	-0.26951	0.723671	1.11315	0.522437	0.712958		1.80434	1.45063	2.69449	0.949901	1.3036	0.0597491	0.771084	0.640917		0.209723	0.581741	0.522437	0.771084	0.395732	0.646761
CATCATGGCTATTCTGCATTA	1110002B05Rik	TRCN0000175126	3.55652	3.66052	4.11667	3.5092		3.20473	3.42191	2.77185	0.351796	0.134614	0.784674	0.423694	0.330941		2.87077	2.26704	3.04005	0.789752	1.39348	0.620474	0.934569	0.406341		4.31795	2.78881	3.10197	-0.201276	1.32786	1.0147	0.713763	0.807768		2.48591	5.52028	2.96432	1.02329	-2.01108	0.544879	-0.147638	1.63142		0.423694	0.934569	0.713763	-0.147638	0.679132	0.283063
ACTCACTCTAGTGTTACACTT	1110002N22Rik	TRCN0000124949	4.17704	4.12366	4.20069	3.90226		2.62353	1.25334	2.39809	1.55351	2.9237	1.77895	2.08539	0.734699		3.13238	1.9003	4.10791	0.991278	2.22336	0.0157501	1.0768	1.10629		1.06687	0.394397	2.13879	3.13382	3.80629	2.0619	3.00067	0.879785		0.349276	0	1.63596	3.55299	3.90226	2.2663	3.24052	0.861578		2.08539	1.0768	3.00067	3.24052	1.58109	3.12059
GAAGAGTTGTATGACTCATTA	1110002N22Rik	TRCN0000124951	4.62099	4.74752	4.40071	4.96296		4.6911	4.66158	4.97823	-0.0701155	-0.0405921	-0.357246	-0.155985	0.174922		4.07742	4.74948	4.11025	0.670098	-0.00196364	0.637266	0.435134	0.378893		2.29721	3.8025	2.43533	2.1035	0.598206	1.96538	1.55569	0.83208		2.65857	4.37475	6.984	2.30439	0.588209	-2.02105	0.290517	2.17803		-0.155985	0.435134	1.55569	0.290517	0.139574	0.923106
GACTCATTATTACAAGCTGTT	1110002N22Rik	TRCN0000124953	4.40171	4.61919	4.53255	4.08111		3.20473	3.62201	3.08442	1.19698	0.779702	1.31728	1.09799	0.282131		3.15115	3.96218	3.15336	1.46804	0.657007	1.46583	1.19696	0.467613		2.6497	2.19663	2.35533	1.88285	2.33591	2.17721	2.13199	0.229894		2.58803	2.72414	6.00286	1.49308	1.35697	-1.92175	0.309432	1.93346		1.09799	1.19696	2.13199	0.309432	1.14747	1.22071
CGTGCTGAGCATAAATCGAAA	1110002N22Rik	TRCN0000124950	0.36943	0.362635	0.471343	0.391308		0.518654	0.412445	0.952531	-0.149223	-0.0430145	-0.583101	-0.258446	0.28613		0.205492	0.326794	0.64163	0.157143	0.0358411	-0.278995	-0.0286704	0.225112		0.94785	0.646999	0.332675	-0.476507	-0.175656	0.138668	-0.171165	0.307612		1.08616	0.140069	0.244773	-0.694848	0.251239	0.146534	-0.099025	0.518647		-0.258446	-0.0286704	-0.171165	-0.099025	-0.143558	-0.135095
GCAAAGACTCAGAGCTCAAAT	1110002N22Rik	TRCN0000124952	4.56477	4.51935	3.71119	4.73626		4.44207	3.77885	4.38043	0.122702	0.785919	0.184345	0.364322	0.366412		4.04768	3.592	3.93907	0.471675	0.927352	0.580285	0.659771	0.23801		3.62996	3.66624	4.5304	0.0812325	0.044959	-0.819206	-0.231005	0.50972		2.75539	4.02624	5.13934	1.98087	0.710019	-0.403078	0.762603	1.19284		0.364322	0.659771	-0.231005	0.762603	0.512046	0.265799
ATGCTCCTCTTCCTTCTGAGG	1110003E01Rik	TRCN0000377048	1.44288	1.00015	1.71751	1.33531		1.56618	1.71655	2.20675	-0.123303	-0.273669	-0.763876	-0.386949	0.334974		1.84894	1.57057	1.59279	-0.848795	-0.570428	-0.592646	-0.670623	0.154701		0.550406	0.323675	0.332675	1.1671	1.39383	1.38483	1.31525	0.128384		0	0.5615	0.703706	1.33531	0.773806	0.6316	0.91357	0.37209		-0.386949	-0.670623	1.31525	0.91357	-0.528786	1.11441
CACGAACATGCTATGAGGAGG	1110003E01Rik	TRCN0000377047	1.69486	2.38271	1.87777	2.13513		2.13857	3.57179	3.18181	-0.44371	-1.87693	-1.48695	-1.26919	0.741006		3.35376	2.58998	2.84016	-0.97105	-0.207274	-0.457455	-0.54526	0.389385		0.0926903	2.46656	1.79235	1.78508	-0.588791	0.0854212	0.427238	1.22329		2.87872	1.45063	0.944509	-0.743585	0.684501	1.19063	0.377181	1.00306		-1.26919	-0.54526	0.427238	0.377181	-0.907227	0.402209
TGTTGGTTGGCCTAAGCTTAA	1110003E01Rik	TRCN0000377050	1.80607	1.00015	2.1337	1.23278		1.37087	1.30695	2.83624	0.435196	0.499113	-1.03018	-0.0319553	0.865074		1.63452	0.498876	0	-0.634377	0.50127	1.00015	0.289013	0.837679		0.0470894	0.461813	0	2.08661	1.67189	2.1337	1.96407	0.254127		0	2.05682	0.0523899	1.23278	-0.824046	1.18039	0.529706	1.17268		-0.0319553	0.289013	1.96407	0.529706	0.128529	1.24689
AGTCCTACTGCACCGACACAG	1110003E01Rik	TRCN0000377049	2.60669	1.94775	0.896828	1.90111		1.68741	1.30695	3.43982	0.91928	1.29973	-0.83313	0.461961	1.1376		2.82475	0.498876	0.765631	-0.877004	1.44887	1.18212	0.584662	1.27285		1.3179	1.56034	0.0906321	-0.421071	-0.663513	0.806196	-0.092796	0.787931		0.185182	0.226422	1.87289	1.71592	1.67469	0.0282167	1.13961	0.962715		0.461961	0.584662	-0.092796	1.13961	0.523312	0.523406
CCTCAACCCACCAAATTCCTA	1110004E09Rik	TRCN0000184159	4.10002	4.56796	4.32998	3.84084		4.54903	4.50981	5.14004	-0.449008	-0.409791	-1.04002	-0.632938	0.353085		4.29272	4.48865	3.84942	0.275241	0.0793167	0.718548	0.357702	0.327497		3.87148	2.80188	4.30762	0.458496	1.5281	0.0223594	0.669653	0.774762		2.74952	0.385015	3.50523	1.09132	3.45583	0.335617	1.62759	1.62777		-0.632938	0.357702	0.669653	1.62759	-0.137618	1.14862
GCTGTTCTACCACAGAAGACA	1110004E09Rik	TRCN0000196061	4.69148	4.24277	4.69035	4.28445		4.22117	5.35485	5.06678	0.470315	-0.66337	-0.375299	-0.189451	0.58925		4.2899	4.75628	4.90075	-0.0471331	-0.51351	-0.657984	-0.406209	0.319249		3.70161	4.39631	5.0985	0.988732	0.294032	-0.408156	0.291536	0.698448		2.28164	2.31509	4.59176	2.00282	1.96937	-0.307305	1.22163	1.3242		-0.189451	-0.406209	0.291536	1.22163	-0.29783	0.756581
GCTGACAACACGGCTTTGAAA	1110004E09Rik	TRCN0000184423	4.65481	4.78912	4.68369	4.48512		2.3245	3.40151	3.7977	2.33031	1.25329	0.857105	1.48024	0.76237		3.69805	3.1194	2.47631	1.09106	1.66972	2.3128	1.6912	0.611152		2.44517	2.27369	1.00358	2.23852	2.40999	3.68011	2.77621	0.787484		2.28164	3.35673	1.05134	2.20349	1.12839	3.43378	2.25522	1.15356		1.48024	1.6912	2.77621	2.25522	1.58572	2.51571
GCGATAGTGTCTAAGAAACAA	1110004E09Rik	TRCN0000179683	4.22786	5.49443	5.38577	4.98205		4.07822	5.08762	4.57413	0.149635	-0.859759	-0.34627	-0.352131	0.504723		4.4601	4.66164	4.37651	1.03433	0.832787	1.11791	0.995009	0.146573		4.93992	3.77626	3.97731	0.44585	1.60951	1.40846	1.1546	0.621977		4.75463	4.5356	4.40543	0.227421	0.446443	0.576613	0.416825	0.17647		-0.352131	0.995009	1.1546	0.416825	0.321439	0.785715
GATGTGTTCTTTGAACCAGAA	1110005A03Rik	TRCN0000177041	3.72519	3.77788	3.70134	3.59437		2.90482	3.48916	2.96854	0.820367	0.23603	0.756652	0.60435	0.320561		3.60129	2.50369	4.12422	0.176591	1.27419	-0.346339	0.368146	0.827071		3.22666	2.25481	1.55832	0.474682	1.44653	2.14302	1.35474	0.837949		0	0	1.12658	3.59437	3.59437	2.46779	3.21884	0.65043		0.60435	0.368146	1.35474	3.21884	0.486248	2.28679
CAGAAGACTTTGAAAGCATTT	1110005A03Rik	TRCN0000177090	2.9949	2.86532	3.66123	3.18605		4.34098	3.81938	3.74836	-1.34608	-0.824481	-0.753452	-0.97467	0.323604		4.32338	3.90824	3.86058	-1.45806	-1.04292	-0.995262	-1.16541	0.254557		2.40054	3.05205	2.05122	1.26069	0.609175	1.61	1.15996	0.507961		3.23829	2.8654	2.93671	-0.0522475	0.320643	0.249334	0.172577	0.197941		-0.97467	-1.16541	1.15996	0.172577	-1.07004	0.666266
GAATTATCTGAGGAAACTCAA	1110005A03Rik	TRCN0000176938	4.05006	3.56795	4.22841	3.01123		2.66349	2.70834	3.44808	1.38658	1.34172	0.601978	1.11009	0.440609		3.38051	3.14554	3.50254	0.187442	0.422416	0.0654086	0.225089	0.181456		1.49816	3.79599	1.96999	2.73025	0.432421	2.25842	1.80703	1.2136		1.14094	0.860495	2.29866	1.87029	2.15074	0.712567	1.57786	0.762376		1.11009	0.225089	1.80703	1.57786	0.667589	1.69245
GCTGAATTATCTGAGGAAACT	1110005A03Rik	TRCN0000177010	4.43669	4.15871	4.52325	3.93202		3.30496	3.58631	3.10548	1.13173	0.850378	1.33121	1.10444	0.241576		2.65982	3.8836	3.31636	1.49889	0.275102	0.842349	0.872113	0.612436		2.55514	2.84038	4.279	1.96812	1.68287	0.244256	1.29841	0.924001		1.91326	4.16936	2.76682	2.01875	-0.237344	1.16519	0.982201	1.13913		1.10444	0.872113	1.29841	0.982201	0.988277	1.14031
CTGAGGAAACTCAATGGGTAT	1110005A03Rik	TRCN0000177923	2.95323	2.79281	2.66002	3.05396		2.97	3.13127	2.55173	-0.0167705	-0.178036	0.401497	0.0688968	0.299114		2.37056	2.97527	1.74519	0.422246	-0.182459	1.04762	0.429136	0.61507		5.07243	2.49902	3.96538	-2.41241	0.161001	-1.30536	-1.18559	1.29088		4.76047	2.99406	1.02537	-1.70651	0.0599001	2.02859	0.127325	1.86846		0.0688968	0.429136	-1.18559	0.127325	0.249016	-0.529132
CGGATGAAACATTGTCTTCCT	1110008F13Rik	TRCN0000194385	2.50322	2.80761	3.19284	3.01123		3.28802	2.86549	3.4522	-0.784805	-0.362276	-0.948981	-0.698687	0.302684		4.70837	4.48046	2.9488	-1.90077	-1.67285	-0.141199	-1.23827	0.956904		3.59869	2.00654	3.1711	-0.405852	1.1863	0.0217452	0.267399	0.824014		6.13718	0.493474	3.63543	-3.12595	2.51776	-0.624202	-0.410798	2.8279		-0.698687	-1.23827	0.267399	-0.410798	-0.96848	-0.0716993
GCTCACCAAAGAAGGCTTTAT	1110008F13Rik	TRCN0000173291	3.95974	4.36785	4.34904	4.00227		3.57662	3.15582	3.06843	0.383123	0.803919	0.891314	0.692785	0.271712		3.94028	3.39254	3.66424	0.427566	0.975314	0.703606	0.702162	0.273877		3.37244	3.21723	2.93466	0.976602	1.13181	1.41438	1.17427	0.221956		3.12055	3.9458	3.58742	0.88172	0.0564708	0.41485	0.451014	0.413811		0.692785	0.702162	1.17427	0.451014	0.697473	0.81264
CTTTATGACATCATTTGCCTT	1110008F13Rik	TRCN0000174297	4.38613	3.76277	4.22612	3.23991		4.15029	4.33589	4.06285	0.235838	0.0502422	0.32328	0.20312	0.139428		3.27038	4.1751	4.21186	0.49239	-0.412332	-0.449085	-0.123009	0.533268		5.1337	5.47408	4.06375	-0.907586	-1.24796	0.162367	-0.664395	0.735945		0.496597	3.43135	3.70254	2.74331	-0.191441	-0.462633	0.696412	1.77784		0.20312	-0.123009	-0.664395	0.696412	0.0400556	0.0160088
CTTCTTGGGAATAGCAGGATT	1110008F13Rik	TRCN0000194345	2.51963	2.79281	2.42473	2.42281		3.39077	3.76295	3.46447	-0.871145	-1.24333	-0.944847	-1.01977	0.19708		2.82475	2.98109	3.47737	-0.0319447	-0.188277	-0.684564	-0.301595	0.340747		2.68734	3.45913	4.46414	-0.262613	-1.0344	-2.03941	-1.11214	0.890945		1.06742	3.80205	3.77837	1.35539	-1.37924	-1.35556	-0.459805	1.57205		-1.01977	-0.301595	-1.11214	-0.459805	-0.660684	-0.785973
GCATTTCTGAATTTGTCCATT	1110008F13Rik	TRCN0000174777	4.74654	4.74752	4.7553	4.10162		5.01571	4.53249	3.71449	-0.269167	0.214048	1.03205	0.325643	0.657746		5.21736	4.24447	4.96296	-0.469847	0.503047	-0.215445	-0.0607483	0.504558		6.41906	4.60827	4.06375	-1.66377	0.147029	0.691546	-0.275064	1.23308		5.74471	3.9989	2.45279	-1.64309	0.102722	1.64883	0.0361548	1.64697		0.325643	-0.0607483	-0.275064	0.0361548	0.132447	-0.119455
GCCTCCTTGGAAGTGAGATTC	1110008J03Rik	TRCN0000345289	2.21158	2.19287	2.40057	3.60672		2.3735	1.71655	3.26838	-0.161922	0.495031	-1.0568	-0.24123	0.778948		1.02382	1.86297	2.30703	1.16906	0.329901	-0.114158	0.4616	0.651667		0.448861	0.0879768	1.72321	1.95171	2.31259	0.677361	1.64722	0.859087		0	0	0.998915	3.60672	3.60672	2.6078	3.27375	0.576724		-0.24123	0.4616	1.64722	3.27375	0.110185	2.46048
ACGGTGAGGATGGGCCATATT	1110008J03Rik	TRCN0000282634	0.856526	0.28016	1.20653	0.536115		1.02735	0.706458	0.284785	-0.170827	0.150068	0.571742	0.183661	0.372423		0.0541816	0.562346	0.15318	0.225978	-0.282186	0.126979	0.0235903	0.269397		0	0.0879768	0.0460276	1.20653	1.11855	1.1605	1.16186	0.0440041		0	0.346971	0	0.536115	0.189145	0.536115	0.420458	0.200324		0.183661	0.0235903	1.16186	0.420458	0.103626	0.791158
ATTCACTCACCCACCTAACTG	1110008J03Rik	TRCN0000345301	1.55857	0.83663	1.92371	2.10061		0.230261	0.881579	1.33777	1.32831	0.676991	0.220802	0.742034	0.556611		0.156798	0.868864	0	0.679832	-0.0322345	0.83663	0.494743	0.46306		0	0	0	1.92371	1.92371	1.92371	1.92371	0		1.48948	3.36627	0.529847	0.611134	-1.26566	1.57077	0.305415	1.44271		0.742034	0.494743	1.92371	0.305415	0.618388	1.11456
ACTGCGATGAGTCACTGTTTG	1110008J03Rik	TRCN0000263439	1.27905	1.40228	0.896828	1.25387		0.943297	1.60682	2.53631	0.33575	-0.327778	-1.25726	-0.41643	0.800197		1.96662	2.7755	0.387418	-0.564342	-1.37322	1.01486	-0.307566	1.21457		2.86867	1.78754	0.369343	-1.97184	-0.890715	0.527485	-0.778356	1.25344		1.19373	0	0.529847	0.0601464	1.25387	0.724026	0.679349	0.598116		-0.41643	-0.307566	-0.778356	0.679349	-0.361998	-0.0495037
AGGCATGCTCAGGTCGTGTTT	1110008J03Rik	TRCN0000263438	2.71752	2.47829	2.09408	1.07577		1.98937	2.40659	1.14786	0.728153	0.310931	1.56967	0.869584	0.641176		0.939963	2.02944	1.14025	1.53832	0.448851	1.33804	1.1084	0.579902		1.23898	0.526219	1.17907	0.855099	1.56786	0.915005	1.11265	0.395355		0.728931	0.5615	0.636655	0.346839	0.51427	0.439115	0.433408	0.0838614		0.869584	1.1084	1.11265	0.433408	0.988994	0.773031
GTTTCCTAAGGGTCGTGAATC	1110008L16Rik	TRCN0000342178	2.05152	2.3014	2.47187	2.89518		0.964775	0.732815	2.58958	1.08674	1.3187	-0.538068	0.622458	1.01172		0.881226	3.1194	2.75295	1.42018	-0.817995	-0.451545	0.0502125	1.20049		2.42749	2.13601	0	0.0443844	0.335861	2.47187	0.950705	1.3254		0.219528	0.626462	0.529847	2.67565	2.26872	2.36533	2.43657	0.212614		0.622458	0.0502125	0.950705	2.43657	0.336335	1.69364
ATAATCTACTCGTCAAGTATT	1110008L16Rik	TRCN0000342175	3.57627	3.85825	3.33985	4.63336		2.72141	3.68748	2.13689	0.854852	-0.111212	1.43938	0.727672	0.783079		2.57896	2.26704	3.03019	1.27929	1.59121	0.828065	1.23286	0.383687		3.55049	1.96067	2.3735	-0.21064	1.37918	0.966348	0.71163	0.82495		2.11831	2.0802	1.95775	2.51505	2.55316	2.67561	2.58127	0.0838918		0.727672	1.23286	0.71163	2.58127	0.980264	1.64645
AGGAATTGATAGGTCATAATC	1110008L16Rik	TRCN0000342114	0.474175	0.514661	1.98998	0.501253		1.14491	2.5543	0.128988	-0.670739	-2.08013	0.345187	-0.801893	1.21796		1.29529	1.24272	1.87201	-0.780627	-0.728063	-1.35735	-0.955347	0.349137		4.2864	1.43174	2.98278	-2.29643	0.558234	-0.992807	-0.910334	1.42912		0.775847	0.422081	0.332129	-0.274594	0.0791719	0.169125	-0.00876571	0.234566		-0.801893	-0.955347	-0.910334	-0.00876571	-0.87862	-0.45955
ATTCCGCAGAGTGGGATAAAC	1110008L16Rik	TRCN0000342174	0.980251	1.44076	0.801635	1.78995		0.194347	0	0	0.785904	0.980251	0.980251	0.915469	0.112206		0.342429	0.466063	0	1.09833	0.974694	1.44076	1.17126	0.241439		0.0470894	0.170896	0	0.754546	0.63074	0.801635	0.728974	0.0882711		0	0	0.529847	1.78995	1.78995	1.26011	1.61334	0.305907		0.915469	1.17126	0.728974	1.61334	1.04336	1.17116
CTATGACACAGTGGTACAAAG	1110008L16Rik	TRCN0000342176	2.87248	1.61911	2.03252	0.635915		4.2433	2.53196	0.83138	-1.37082	0.340523	2.0411	0.336936	1.70596		0.506876	1.7032	1.08419	1.11223	-0.0840953	0.534919	0.521018	0.598284		0.301294	0.170896	0	1.73123	1.86163	2.03252	1.87513	0.1511		1.74662	1.7566	1.02537	-1.11071	-1.12069	-0.389452	-0.873615	0.419328		0.336936	0.521018	1.87513	-0.873615	0.428977	0.500755
TGTTCTGGCCTGGGTAGATAC	1110008P14Rik	TRCN0000328619	2.59899	3.53276	2.89145	1.46761		2.52577	2.98543	3.40202	0.0732185	-0.386449	-0.803038	-0.372089	0.438305		3.46293	2.24786	2.6665	0.0698286	1.2849	0.866263	0.74033	0.617246		1.515	0.958419	0	1.37645	1.93303	2.89145	2.06698	0.766331		0.775847	0.183891	0.736097	0.691762	1.28372	0.731511	0.90233	0.330889		-0.372089	0.74033	2.06698	0.90233	0.18412	1.48465
CCATGTTGGATCAGATCAACT	1110008P14Rik	TRCN0000201094,TRCN0000328618	3.54053	3.43132	3.58823	3.77305		3.85775	4.30108	4.20376	-0.317221	-0.760556	-0.663229	-0.580335	0.233002		5.71771	3.40989	4.30882	-2.28639	0.0214222	-0.877501	-1.04749	1.16326		3.14784	3.84731	4.82749	0.440393	-0.259075	-1.23925	-0.352645	0.843723		2.91585	1.74202	2.84316	0.857198	2.03103	0.92989	1.27271	0.657732		-0.580335	-1.04749	-0.352645	1.27271	-0.813913	0.46003
CTCCATGTTGGATCAGATCAA	1110008P14Rik	TRCN0000192128	3.03541	2.51481	2.59053	2.73186		3.27088	2.94655	2.77842	-0.235471	0.0888581	0.256992	0.0367931	0.250326		2.80118	2.71394	2.42457	-0.286368	-0.19913	0.0902396	-0.131753	0.197137		1.95848	1.49747	1.6654	0.632049	1.09305	0.925124	0.883409	0.233317		2.92108	3.68875	0.492412	-0.18922	-0.956892	2.23944	0.364444	1.66855		0.0367931	-0.131753	0.883409	0.364444	-0.0474798	0.623926
CATCAACTCCATGTTGGATCA	1110008P14Rik	TRCN0000201014,TRCN0000328617	4.49179	5.24278	4.79291	4.11609		3.64474	3.32562	3.94515	0.847057	1.16617	0.546647	0.853292	0.309811		3.35915	3.33917	2.55405	1.88363	1.90361	2.68873	2.15866	0.459168		2.72403	2.70782	2.89748	2.06888	2.08509	1.89543	2.01647	0.105136		1.40246	3.56163	1.28822	2.71363	0.55446	2.82787	2.03199	1.28085		0.853292	2.15866	2.01647	2.03199	1.50597	2.02423
CAACTCCATGTTGGATCAGAT	1110008P14Rik	TRCN0000192305	3.72872	2.73205	3.34829	2.1577		2.63697	2.76052	3.3849	1.09175	0.968207	0.343822	0.80126	0.40094		3.78473	2.45436	2.54715	-1.05268	0.277697	0.184902	-0.196693	0.742756		4.55632	1.64979	1.96999	-1.20802	1.69851	1.3783	0.622928	1.59371		0.149999	1.35803	2.49125	2.0077	0.799666	-0.333557	0.824602	1.17083		0.80126	-0.196693	0.622928	0.824602	0.302283	0.723765
GTATGCTGCCATCAACTCCAT	1110008P14Rik	TRCN0000201825,TRCN0000328689	4.40392	4.52384	4.1142	4.01159		3.8777	4.78321	3.80416	0.526218	-0.379292	0.599762	0.248896	0.545268		4.56646	4.43243	5.26251	-0.042614	0.0914123	-0.738669	-0.229957	0.445625		4.33465	4.09566	4.79079	-0.220453	0.0185317	-0.67659	-0.292837	0.353169		3.73622	2.54251	3.13801	0.275367	1.46908	0.873583	0.872678	0.596858		0.248896	-0.229957	-0.292837	0.872678	0.00946974	0.28992
CAGCGTTCAGAAATACACCAT	1110012L19Rik	TRCN0000201569,TRCN0000319865	1.83258	2.44081	1.93496	1.9918		1.30504	0.758699	1.12741	0.527541	1.07388	0.705163	0.768861	0.278683		1.02382	1.57057	0.835218	1.417	0.870237	1.60559	1.29761	0.381938		0.41336	0.170896	0.474067	1.5216	1.76407	1.4609	1.58219	0.160409		0	0.688625	0.373899	1.9918	1.30318	1.6179	1.63763	0.344736		0.768861	1.29761	1.58219	1.63763	1.03323	1.60991
CTGAAGTACCTGACTCAAGTT	1110012L19Rik	TRCN0000190354,TRCN0000319919	3.09685	3.02579	3.74036	2.9672		2.38947	2.99635	1.84301	0.707377	0.100494	1.25384	0.687238	0.576938		0.689138	2.70694	2.41703	2.33665	0.318852	0.608762	1.08809	1.09096		2.42749	2.27369	2.73838	1.31288	1.46667	1.00199	1.26051	0.236728		1.9444	2.60025	0	1.0228	0.366956	2.9672	1.45232	1.35229		0.687238	1.08809	1.26051	1.45232	0.887664	1.35642
CTACGCTGGTTTAATCTTAAA	1110012L19Rik	TRCN0000191132,TRCN0000319925	4.01287	4.08166	3.72098	3.05996		3.88898	3.92603	3.71792	0.123892	0.0868429	0.294954	0.168563	0.111015		4.21458	4.07801	3.77168	-0.132921	0.00365664	0.309984	0.0602397	0.226809		3.67937	4.07428	3.02361	0.0416144	-0.353299	0.697369	0.128561	0.530703		4.51295	1.97188	1.22115	-1.453	1.08808	1.83881	0.491296	1.72514		0.168563	0.0602397	0.128561	0.491296	0.114401	0.309929
GCTAACCAATCTGCAGCTGAA	1110012L19Rik	TRCN0000189745,TRCN0000350201	2.00565	2.55044	2.55449	3.01741		3.3217	2.30486	2.09539	-1.31605	-0.299204	-0.0897396	-0.568331	0.655959		2.9657	1.05689	0.0786222	-0.415263	1.49355	2.47182	1.18337	1.46832		1.71779	1.59078	4.13203	0.8367	0.963708	-1.57754	0.0742884	1.43194		2.80712	3.86398	0.944509	0.210291	-0.846563	2.0729	0.478877	1.47815		-0.568331	1.18337	0.0742884	0.478877	0.307518	0.276583
TCTCGCCTCTGCCTGGATTAT	1110014N23Rik	TRCN0000269152	1.934	1.83671	1.80601	2.20179		2.01018	2.56167	3.35444	-0.0761749	-0.627668	-1.42044	-0.708094	0.675732		3.62386	1.73109	3.07403	-1.78714	0.105622	-1.23731	-0.972946	0.973684		0.179783	3.60791	1.11574	1.62623	-1.8019	0.69027	0.171532	1.77196		0.0769479	0	0.199029	2.12484	2.20179	2.00276	2.1098	0.100364		-0.708094	-0.972946	0.171532	2.1098	-0.84052	1.14067
CACGGGATGCTGAAGCTTTAC	1110014N23Rik	TRCN0000347382	2.20144	0.89322	1.22499	1.29516		0.830833	1.2893	1.67006	1.37061	0.91214	0.53138	0.938043	0.420214		1.27261	2.47099	2.78847	-0.379394	-1.57777	-1.89525	-1.28414	0.799449		0.376963	0.170896	0	0.848025	1.05409	1.22499	1.04237	0.188755		0	0	0.102944	1.29516	1.29516	1.19222	1.26085	0.0594347		0.938043	-1.28414	1.04237	1.26085	-0.173047	1.15161
GGTGCTGACTGGCATCATTAA	1110014N23Rik	TRCN0000269098	1.4936	1.40228	1.50733	2.71674		0.194347	1.74272	1.45724	1.29925	-0.249121	0.0363598	0.362164	0.824001		1.42432	0.0888957	0.116383	-0.0220394	1.31338	1.2859	0.859081	0.763196		0.0470894	0.958419	0	1.46024	0.548908	1.50733	1.17216	0.540263		1.32571	1.29948	0.244773	1.39103	1.41726	2.47197	1.76009	0.616646		0.362164	0.859081	1.17216	1.76009	0.610622	1.46612
GGGTTCATGGATCCTTCTAAT	1110014N23Rik	TRCN0000269151	2.18096	2.44081	2.25545	2.33644		2.54728	0.507105	2.21646	-0.366326	1.67385	-0.0355096	0.424005	1.09496		1.12854	0.593063	1.15847	1.31227	1.84775	1.28235	1.48079	0.318148		1.92105	1.43174	0	0.334398	0.823706	2.25545	1.13785	0.99831		0	0.183891	0	2.33644	2.15255	2.33644	2.27515	0.10617		0.424005	1.48079	1.13785	2.27515	0.952397	1.7065
TGGAGGACACTACAGCTATTG	1110014N23Rik	TRCN0000363904	2.26122	2.17015	2.28214	2.95437		1.56618	3.50836	2.17723	0.695034	-1.24714	0.0839898	-0.15604	0.993088		1.52368	1.66033	1.32898	0.646476	0.509819	0.841175	0.665823	0.166523		2.40958	1.67841	1.84538	-0.127438	0.603731	0.436766	0.304353	0.383148		1.47534	1.85476	1.15081	1.47903	1.09961	1.80356	1.46074	0.352332		-0.15604	0.665823	0.304353	1.46074	0.254892	0.882545
GCCGAATTCTAACGTGGTGAA	1110018G07Rik	TRCN0000087327	7.98016	7.85204	7.96813	8.0625		8.02904	8.16819	8.30775	-0.0488803	-0.18803	-0.327589	-0.188166	0.139354		8.06861	8.02354	8.40091	-0.216571	-0.171504	-0.548867	-0.312314	0.206097		8.42904	7.87131	8.11683	-0.460913	0.0968128	-0.148702	-0.170934	0.279527		6.01723	6.40441	5.85769	2.04527	1.65808	2.20481	1.96939	0.281151		-0.188166	-0.312314	-0.170934	1.96939	-0.25024	0.899226
CCCAAATCATAGGACTCCGTA	1110018G07Rik	TRCN0000087326	4.84749	5.31963	5.15371	5.70511		5.72794	6.07142	5.56648	-0.880447	-1.22393	-0.718994	-0.941124	0.257878		5.34102	5.12938	5.95144	-0.0213863	0.190256	-0.63181	-0.154314	0.426849		5.15267	7.21078	6.36801	0.00104209	-2.05707	-1.21431	-1.09011	1.03466		4.72952	4.01111	5.16037	0.975589	1.694	0.544738	1.07144	0.580595		-0.941124	-0.154314	-1.09011	1.07144	-0.547719	-0.00933457
GCGCTTGAAGATGTATGAGTT	1110018G07Rik	TRCN0000087325	4.03302	3.78537	3.80622	3.91887		5.45002	5.11543	4.58729	-1.417	-1.08242	-0.554271	-1.0179	0.434969		4.8472	5.37341	5.00257	-1.06182	-1.58804	-1.2172	-1.28902	0.270361		5.59531	5.76511	4.68749	-1.7891	-1.95889	-0.881268	-1.54308	0.579404		4.8874	4.7657	2.55619	-0.968529	-0.846833	1.36267	-0.150896	1.3122		-1.0179	-1.28902	-1.54308	-0.150896	-1.15346	-0.84699
CCCATCAATAATGGCGAATTT	1110018G07Rik	TRCN0000087324	4.77587	3.7243	4.93425	5.17412		3.96821	4.57135	4.88846	0.807657	0.204517	-0.112587	0.299862	0.467472		4.97031	4.74265	4.03338	-1.24601	-1.01835	-0.309081	-0.857813	0.488658		4.53583	5.72622	6.19432	0.398427	-0.791971	-1.26007	-0.551205	0.855061		5.99385	4.52073	3.45259	-0.819731	0.653393	1.72153	0.518397	1.276		0.299862	-0.857813	-0.551205	0.518397	-0.278975	-0.0164037
CCGGGAATGGTTTGAGCTAAT	1110018G07Rik	TRCN0000010874	2.53585	1.83671	2.36771	1.18963		2.68952	2.73467	2.55173	-0.153668	-0.198816	-0.0158807	-0.122788	0.0952969		2.44343	1.75845	1.92617	-0.606714	0.0782633	-0.0894598	-0.20597	0.357043		0.41336	1.91328	1.96999	1.95435	0.454429	0.397726	0.935503	0.882806		2.69564	3.74468	1.81341	-1.50601	-2.55505	-0.623781	-1.56161	0.966835		-0.122788	-0.20597	0.935503	-1.56161	-0.164379	-0.313055
CCGACTTACATAGTTTGTTAA	1110018G07Rik	TRCN0000087323	5.19268	5.32736	5.12081	4.54197		6.1964	5.60095	5.77552	-1.00372	-0.408269	-0.582835	-0.664942	0.3061		6.33274	6.29064	6.19037	-1.00538	-0.963285	-0.863015	-0.943893	0.0731366		7.06836	5.81752	6.55571	-1.94755	-0.69671	-1.4349	-1.35972	0.6288		7.05561	6.32101	5.14236	-2.51363	-1.77904	-0.600385	-1.63102	0.965174		-0.664942	-0.943893	-1.35972	-1.63102	-0.804418	-1.49537
GCTATGAAACACAGAACTTAT	1110018J18Rik	TRCN0000176962	4.46026	4.68077	4.65674	4.7896		4.89224	5.09906	4.39332	-0.431982	-0.6388	0.0669372	-0.334615	0.362803		5.14431	5.2195	4.18767	-0.463543	-0.538734	0.493094	-0.169728	0.57525		5.0335	2.48288	5.34625	-0.376759	2.17386	-0.689507	0.369197	1.57069		5.22195	3.41305	4.47186	-0.43235	1.37655	0.317744	0.420648	0.90883		-0.334615	-0.169728	0.369197	0.420648	-0.252171	0.394923
GACAATCATCATACCATCATA	1110018J18Rik	TRCN0000197841	4.86204	5.09982	5.14283	5.25744		5.82508	5.89009	6.00364	-0.96304	-1.02805	-1.1416	-1.04423	0.0903703		7.33748	7.40015	6.44807	-2.23766	-2.30033	-1.34826	-1.96208	0.532511		5.5653	5.6542	6.83425	-0.422474	-0.511371	-1.69142	-0.875089	0.708362		7.51305	5.90851	6.14157	-2.25561	-0.651074	-0.884135	-1.26361	0.86697		-1.04423	-1.96208	-0.875089	-1.26361	-1.50315	-1.06935
CATACCATCATATTGAGCCTT	1110018J18Rik	TRCN0000198178	4.16926	4.25362	4.24885	4.2612		4.8668	4.80356	4.94357	-0.69754	-0.634298	-0.774313	-0.70205	0.0701165		4.68065	4.98629	4.76172	-0.427036	-0.732676	-0.508105	-0.555939	0.158335		4.51504	5.59912	5.50709	-0.266192	-1.35027	-1.25824	-0.958235	0.60109		3.2632	4.01111	4.15296	0.997998	0.250087	0.108244	0.45211	0.478043		-0.70205	-0.555939	-0.958235	0.45211	-0.628995	-0.253062
CCAGGTAACAACATCCACTTT	1110018J18Rik	TRCN0000198631	3.63016	3.91402	3.53744	3.7984		2.50393	3.00719	2.55173	1.12623	0.622964	1.07842	0.942539	0.277791		3.63723	2.63496	3.04984	0.276787	1.27906	0.864181	0.806676	0.503604		3.8384	2.66555	3.13429	-0.300966	0.871888	0.40315	0.324691	0.590351		1.66174	2.56753	6.34429	2.13666	1.23086	-2.54589	0.273877	2.48363		0.942539	0.806676	0.324691	0.273877	0.874607	0.299284
GTCTGTAAAGAATATGTCGAA	1110018J18Rik	TRCN0000177195	5.05592	4.99706	5.37857	5.52918		5.77505	6.1909	5.34315	-0.719124	-1.13498	-0.28723	-0.713777	0.423899		6.06395	5.9471	5.92509	-1.06689	-0.95004	-0.92803	-0.981655	0.0746353		6.88815	7.63301	7.41156	-1.50958	-2.25444	-2.03299	-1.93234	0.382492		5.80815	5.43671	9.29118	-0.27897	0.0924669	-3.762	-1.31617	2.12628		-0.713777	-0.981655	-1.93234	-1.31617	-0.847716	-1.62425
TTCACCGTGAGACGGACTAAA	1110020G09Rik	TRCN0000360715	1.15848	0.947673	2.31698	3.23991		3.0067	2.79219	2.99134	-1.84822	-1.63371	-1.83286	-1.7716	0.119659		1.22617	1.24272	1.57934	-0.278495	-0.29505	-0.631662	-0.401736	0.199294		0.897348	0.646999	2.00536	1.41963	1.66998	0.311617	1.13374	0.722903		3.33153	0	1.94394	-0.0916246	3.23991	1.29596	1.48141	1.67349		-1.7716	-0.401736	1.13374	1.48141	-1.08667	1.30758
GCTGTAGCAGTGGACAATTTA	1110020G09Rik	TRCN0000024983	2.68879	2.3014	2.06363	2.29634		5.31543	4.23578	2.96278	-2.62664	-1.54699	-0.273991	-1.48254	1.17765		3.48282	3.45239	4.0135	-1.18142	-1.15099	-1.7121	-1.34817	0.315539		2.3823	2.96179	2.0399	-0.318667	-0.898159	0.0237336	-0.397697	0.466		2.72582	2.0802	1.41368	-0.429489	0.216134	0.882654	0.2231	0.6561		-1.48254	-1.34817	-0.397697	0.2231	-1.41535	-0.0872988
CTCTTTAGAGGCAGGTTAAAT	1110020G09Rik	TRCN0000360716	1.1998	0.89322	1.33106	1.58879		0.575603	0.476237	0.80588	0.624197	0.723563	0.39392	0.58056	0.169099		0.545217	0.96594	0.588883	0.348003	-0.0727206	0.304337	0.193206	0.231332		0.41336	0.0879768	0.0460276	0.9177	1.24308	1.28503	1.14861	0.201067		0.410021	0	0.0523899	1.17877	1.58879	1.5364	1.43465	0.223145		0.58056	0.193206	1.14861	1.43465	0.386883	1.29163
CGCAGGCTGTTGAAGATGTTT	1110020G09Rik	TRCN0000024981	1.98216	2.3014	1.62322	1.46761		2.95934	2.26025	1.99742	-0.977175	-0.27809	-0.0152539	-0.423507	0.497175		2.39176	1.87552	1.86093	-0.0903561	0.425881	0.440469	0.258665	0.302349		0.301294	0.249307	0.856354	1.32192	1.37391	0.766863	1.15423	0.336477		1.14094	0.527888	1.37306	0.326665	0.939721	0.0945465	0.453644	0.436661		-0.423507	0.258665	1.15423	0.453644	-0.0824209	0.803938
GCCGAGCCTTTAACATCGAAA	1110020G09Rik	TRCN0000024979	0.0906555	0	0.162071	0		0.230261	0.0842967	0	-0.139605	0.00635881	0.0906555	-0.014197	0.116499		0	0.0888957	1.22911	0	-0.0888957	-1.22911	-0.439334	0.685406		0	0.323675	0	0.162071	-0.161604	0.162071	0.0541794	0.186874		0	1.88162	0	0	-1.88162	0	-0.627207	1.08635		-0.014197	-0.439334	0.0541794	-0.627207	-0.226766	-0.286514
ACTACTTGAGCGACATCATAT	1110020G09Rik	TRCN0000360714	3.8698	3.66052	3.00264	3.63514		1.59401	1.78111	0.32124	2.27579	2.08869	3.54856	2.63768	0.794376		2.95862	2.66418	0.189063	0.701903	0.996337	3.47146	1.72323	1.52115		0.79071	0.0879768	4.6034	2.21193	2.91466	-1.60077	1.17527	2.42966		0.969914	0	1.47254	2.66522	3.63514	2.16259	2.82098	0.748526		2.63768	1.72323	1.17527	2.82098	2.18046	1.99813
CGACATCATATTCACACCAAA	1110020G09Rik	TRCN0000024980	4.25751	4.05711	3.67136	3.28159		3.75054	3.89427	3.64788	0.506972	0.363242	0.609631	0.493282	0.123764		4.20264	3.90518	3.68638	-0.145534	0.151922	0.370726	0.125705	0.259127		3.28184	4.2177	3.99502	0.389526	-0.546335	-0.323656	-0.160155	0.488885		3.39677	4.82226	2.23209	-0.115176	-1.54066	1.04951	-0.202111	1.29727		0.493282	0.125705	-0.160155	-0.202111	0.309493	-0.181133
CGACAAGGAAATCTGACTCTT	1110020G09Rik	TRCN0000024982	3.59961	3.87942	3.53744	4.06329		3.14012	2.81704	2.61183	0.459491	0.782566	0.98778	0.743279	0.266327		0.342429	2.23818	1.56575	3.53699	1.64124	2.31367	2.4973	0.961123		1.21856	1.8643	2.45252	2.31888	1.67314	1.08491	1.69231	0.617207		4.99293	3.24739	2.27681	-0.929634	0.815902	1.78648	0.557583	1.37636		0.743279	2.4973	1.69231	0.557583	1.62029	1.12495
TTTGGTATAGGAGTTACTAAT	1110028C15Rik	TRCN0000347590	3.61496	3.31185	3.30989	4.58006		3.56963	2.33957	2.65531	0.0453354	1.27539	0.959649	0.760125	0.63884		0.582565	2.34129	2.81167	2.72928	0.970555	0.500178	1.40001	1.17497		3.34914	1.93717	0.133899	-0.039251	1.37272	3.17599	1.50315	1.61159		3.40052	3.89067	2.29866	1.17954	0.689393	2.2814	1.38344	0.815352		0.760125	1.40001	1.50315	1.38344	1.08007	1.4433
GATGATACAAACAATGGCTTT	1110028C15Rik	TRCN0000176833	4.01287	4.32735	4.42087	3.72475		4.54547	4.22885	4.59847	-0.532598	-0.215977	-0.585598	-0.444724	0.199866		4.52389	5.35337	5.08582	-0.196541	-1.02602	-0.758472	-0.660344	0.423355		4.36051	5.65059	4.26447	0.0603572	-1.22972	0.1564	-0.337655	0.774044		3.39677	4.23853	6.90251	0.327983	-0.513774	-3.17776	-1.12118	1.8301		-0.444724	-0.660344	-0.337655	-1.12118	-0.552534	-0.729419
CTCCAGTAGCTGGTTACTTAA	1110028C15Rik	TRCN0000347509	2.04019	1.19281	2.50246	1.6053		0.876876	1.63505	0.522515	1.16331	0.405139	1.51767	1.02871	0.568349		2.16433	0.362892	0	-0.971516	0.829918	1.19281	0.350404	1.15911		2.45394	3.11623	2.15987	0.0485268	-0.613767	0.342588	-0.0742174	0.489851		0	0.307896	1.51049	1.6053	1.2974	0.0948117	0.999173	0.798186		1.02871	0.350404	-0.0742174	0.999173	0.689556	0.462478
TAGGTGACAGGGAACGTATTA	1110028C15Rik	TRCN0000347591	1.69486	0.514661	0.375435	1.09927		0.299514	0.202169	0	1.39535	1.49269	1.69486	1.52763	0.152783		0.106402	0.652603	1.08419	0.408259	-0.137942	-0.569527	-0.0997366	0.490011		0.996644	1.09208	0	-0.621209	-0.716647	0.375435	-0.320807	0.604848		0	0.0948736	0	1.09927	1.0044	1.09927	1.06765	0.0547753		1.52763	-0.0997366	-0.320807	1.06765	0.713949	0.373421
GCATGTATGAATTACTCTATG	1110028C15Rik	TRCN0000347511	3.43202	3.57662	3.50002	3.57773		3.33825	2.49394	1.47353	0.0937607	0.938074	1.95849	0.996774	0.933748		3.212	2.33222	3.05471	0.364622	1.2444	0.52191	0.71031	0.469173		1.7466	2.53076	3.6523	1.75342	0.969261	-0.152272	0.856804	0.957812		2.07206	5.54779	3.30925	1.50567	-1.97006	0.26848	-0.0653048	1.76174		0.996774	0.71031	0.856804	-0.0653048	0.853542	0.39575
TTAAGCCAGAAGTCAACATAT	1110028C15Rik	TRCN0000347510	2.35564	2.51481	2.66679	2.10061		1.2881	1.30695	1.14786	1.06754	1.04869	1.20779	1.10801	0.0869242		0	1.37234	1.81574	2.51481	1.14248	0.699072	1.45212	0.946646		1.9829	2.56182	1.75126	0.683886	0.104968	0.915525	0.568126	0.417494		2.24875	0.777118	2.19761	-0.148139	1.3235	-0.0969961	0.359454	0.835277		1.10801	1.45212	0.568126	0.359454	1.28006	0.46379
CGACTCCTGAACCTACTCTAA	1110028C15Rik	TRCN0000200124	3.0124	3.43132	2.376	1.18963		3.15887	2.39013	2.42346	-0.146471	0.622275	0.588941	0.354915	0.434533		2.32721	2.14796	1.36079	1.1041	1.28335	2.07053	1.48599	0.514093		1.9829	0.861893	2.07362	0.393094	1.5141	0.302379	0.736526	0.674929		5.26267	0.493474	0.636655	-4.07303	0.696159	0.552979	-0.941299	2.71311		0.354915	1.48599	0.736526	-0.941299	0.920455	-0.102386
GAAGGCAGGTTCATTGAGGTT	1110031I02Rik	TRCN0000202378,TRCN0000329050	3.72872	3.80763	3.99823	4.11609		4.09049	4.44951	4.3388	-0.361764	-0.720782	-0.610076	-0.564208	0.183852		3.8551	3.8898	3.75082	-0.0474694	-0.0821758	0.0568036	-0.0242805	0.0723334		3.00609	2.34685	2.55158	0.992146	1.65139	1.44666	1.3634	0.337415		3.95585	2.31509	1.41368	0.16024	1.80101	2.70241	1.55455	1.28888		-0.564208	-0.0242805	1.3634	1.55455	-0.294244	1.45897
GTCAGGTCCTGAGTACCATGT	1110031I02Rik	TRCN0000329111	2.37381	1.83671	2.31698	2.42281		0.0809064	0.881579	0	2.2929	1.49223	2.37381	2.05298	0.487306		2.06226	0.709783	0.356195	-0.225551	1.12693	1.48052	0.793965	0.900453		0.339625	0.0879768	0	1.97736	2.229	2.31698	2.17445	0.176263		0	0	0	2.42281	2.42281	2.42281	2.42281	0		2.05298	0.793965	2.17445	2.42281	1.42347	2.29863
GCTTTACCTATCGGATTACTT	1110031I02Rik	TRCN0000191820,TRCN0000329053	5.27714	4.45971	4.30416	4.21891		4.07822	4.16495	4.25177	1.19892	1.11219	1.02538	1.11216	0.0867703		4.55241	4.13391	3.1579	-0.0926956	0.325796	1.30181	0.511638	0.715588		4.20569	2.90236	3.4186	0.0984698	1.4018	0.885559	0.795277	0.656339		2.54127	3.22134	1.61869	1.67764	0.997569	2.60022	1.75848	0.80438		1.11216	0.511638	0.795277	1.75848	0.8119	1.27688
GCTGCTTTACCTATCGGATTA	1110031I02Rik	TRCN0000192673	4.45813	3.55923	4.34904	3.69806		4.35528	4.26316	4.07358	0.102851	0.194976	0.384559	0.227462	0.143636		2.24807	4.64341	3.61892	1.31117	-1.08418	-0.0596883	0.0557678	1.20184		4.41762	3.73598	3.96538	-0.0685784	0.613064	0.383658	0.309381	0.346838		3.84472	4.11097	3.4379	-0.14666	-0.412906	0.260164	-0.0998008	0.338973		0.227462	0.0557678	0.309381	-0.0998008	0.141615	0.10479
GATTCGCAGAATAGCAGAGAA	1110031I02Rik	TRCN0000201344,TRCN0000329051	4.26483	3.75516	3.71447	3.54387		3.87203	4.78163	4.91553	0.392804	-0.516801	-0.650701	-0.258233	0.567775		5.29395	4.57581	3.93379	-1.53879	-0.820656	-0.178633	-0.846026	0.680433		5.0653	3.68751	4.19977	-1.35083	0.0269507	-0.485302	-0.603062	0.6964		5.62569	4.23593	6.64491	-2.08182	-0.692056	-3.10104	-1.95831	1.20923		-0.258233	-0.846026	-0.603062	-1.95831	-0.55213	-1.28068
CCAGGAAAGATACGACCTAAA	1110032A03Rik	TRCN0000173207	3.00076	2.74748	3.0858	2.98624		3.84333	2.43897	3.53988	-0.842566	0.561789	-0.539123	-0.2733	0.738952		2.21277	3.0268	2.82883	0.534712	-0.279321	-0.0813496	0.0580137	0.424534		4.71782	2.1565	1.68007	-1.63202	0.929299	1.40573	0.234334	1.63377		0.604498	0.307896	1.33127	2.38174	2.67834	1.65497	2.23835	0.526538		-0.2733	0.0580137	0.234334	2.23835	-0.107643	1.23634
CAACATATCTCCAGAGACAAA	1110032A03Rik	TRCN0000176429	4.13506	4.03212	4.10176	4.03615		3.59739	2.47064	3.35004	0.537662	1.66442	0.785016	0.995698	0.592186		3.08762	3.32552	2.90092	0.944505	0.706605	1.1312	0.927436	0.212811		2.70213	2.82766	2.34616	1.39963	1.2741	1.7556	1.47644	0.249769		1.88144	1.81351	3.34119	2.15471	2.22264	0.694964	1.69077	0.863065		0.995698	0.927436	1.47644	1.69077	0.961567	1.58361
CACTTCTTTATGGCCTCTAAT	1110032A03Rik	TRCN0000175510	4.456	4.23732	4.57094	3.83735		4.65357	4.77531	4.53586	-0.197566	-0.319303	-0.0798582	-0.198909	0.119728		4.51426	4.24447	4.36871	-0.276942	-0.00715251	-0.131395	-0.138497	0.135035		4.60039	4.64861	3.40983	-0.0294536	-0.0776698	1.16111	0.351329	0.701705		5.74839	2.65576	2.66114	-1.91103	1.18159	1.17622	0.148925	1.78398		-0.198909	-0.138497	0.351329	0.148925	-0.168703	0.250127
CTTATTTATGCTGATGGTCAT	1110032A03Rik	TRCN0000174395	4.56675	4.62755	4.55278	4.0543		5.23375	4.575	4.26118	-0.667	-0.0082523	0.305568	-0.123228	0.496374		4.84335	4.73922	5.07268	-0.2158	-0.111663	-0.445122	-0.257528	0.170601		4.90519	5.37044	5.25856	-0.352411	-0.817661	-0.705775	-0.625282	0.242845		4.30677	3.41305	3.57851	-0.252469	0.641251	0.47579	0.288191	0.475477		-0.123228	-0.257528	-0.625282	0.288191	-0.190378	-0.168546
CAACACCATCATACTGACCAT	1110032A04Rik	TRCN0000193856	4.15357	3.61077	3.86036	4.27674		4.41111	5.01296	2.34596	-0.257536	-0.859387	1.80761	0.23023	1.39881		4.28708	3.95924	3.71435	-0.676312	-0.348473	-0.103585	-0.376123	0.287363		3.33498	4.9123	3.401	0.525384	-1.05194	0.459363	-0.0223973	0.89222		4.59537	2.15916	5.11337	-0.318623	2.11758	-0.836624	0.320778	1.57748		0.23023	-0.376123	-0.0223973	0.320778	-0.0729465	0.14919
GCTCCAGTTAAAGGCTTTGAT	1110032A04Rik	TRCN0000175958	3.42332	2.89334	4.37407	2.21261		2.29936	3.36407	2.9512	1.12396	0.0592545	0.472123	0.551779	0.536803		2.32721	3.68048	2.72877	0.566125	-0.787141	0.164566	-0.0188165	0.695021		2.13231	2.17671	4.15846	2.24176	2.19737	0.215613	1.55158	1.15719		2.70173	4.13628	1.97142	-0.489122	-1.92368	0.241192	-0.723869	1.10136		0.551779	-0.0188165	1.55158	-0.723869	0.266481	0.413855
GCTCTATTATCAATACCAGAT	1110032A04Rik	TRCN0000193610	5.46679	5.70271	5.59629	5.36072		6.3461	5.8455	6.39587	-0.879303	-0.378705	-0.929081	-0.72903	0.304409		6.09901	6.13496	6.28977	-0.396304	-0.432249	-0.587063	-0.471872	0.101364		6.02754	5.62508	5.43325	-0.431245	-0.0287896	0.163047	-0.0989956	0.303302		6.25777	6.31425	6.11411	-0.897043	-0.953528	-0.753385	-0.867985	0.103187		-0.72903	-0.471872	-0.0989956	-0.867985	-0.600451	-0.483491
GCCTGGAGTATGAGATAGGTT	1110032A04Rik	TRCN0000173980	3.57627	3.02579	2.66002	3.43263		2.04084	2.27826	2.63373	1.53543	1.298	0.942531	1.25865	0.2984		2.56036	2.28596	2.64082	0.46543	0.739827	0.384974	0.530077	0.18605		1.93364	3.20744	1.31686	0.726386	-0.547418	1.34316	0.507375	0.964128		1.95463	1.99666	7.04669	1.478	1.43596	-3.61406	-0.233366	2.92784		1.25865	0.530077	0.507375	-0.233366	0.894366	0.137005
CTATGACAGTTCCATTTCTAA	1110032A04Rik	TRCN0000174400	4.53077	3.61918	3.69804	4.70021		4.05838	3.6007	2.98567	0.472386	0.930071	1.54509	0.982517	0.538273		3.63723	4.91666	4.18101	-0.0180519	-1.29748	-0.561827	-0.625787	0.642109		4.7341	4.75322	2.67388	-1.03606	-1.05518	1.02416	-0.355696	1.19503		6.61626	5.35521	4.85404	-1.91605	-0.655002	-0.153835	-0.908295	0.908002		0.982517	-0.625787	-0.355696	-0.908295	0.178365	-0.631995
GACTGTAATGAAAGACTCGTA	1110034G24Rik	TRCN0000092996	4.82786	5.34775	4.98117	5.20153		4.00496	4.97068	4.31188	0.822899	-0.142819	0.515979	0.398686	0.493428		4.14451	3.45658	4.09141	1.20324	1.89117	1.25634	1.45025	0.382773		3.90701	3.60045	2.73135	1.07415	1.38072	2.24981	1.56823	0.609848		1.67418	0.346971	1.35232	3.52735	4.85456	3.84921	4.07704	0.692313		0.398686	1.45025	1.56823	4.07704	0.924467	2.82263
GCTCTATCTTACAGCGACATT	1110034G24Rik	TRCN0000092994	4.92499	4.21529	4.6136	4.09579		2.78316	3.3082	2.75195	2.14183	1.6168	2.17304	1.97722	0.312527		3.57836	3.80378	3.90171	0.636929	0.411507	0.313577	0.454004	0.165812		4.17952	3.01886	1.99367	0.434086	1.59474	2.61993	1.54959	1.09362		0.865336	1.23844	0.289112	3.23045	2.85735	3.80668	3.29816	0.478273		1.97722	0.454004	1.54959	3.29816	1.21561	2.42387
CCAGATAGCAATTCTCTAAAT	1110034G24Rik	TRCN0000092995	4.16144	4.57663	4.80523	3.51794		5.0675	4.24725	5.58441	-0.906064	-0.0858093	-1.42297	-0.804946	0.674289		4.59643	4.90905	4.07712	-0.0198051	-0.332423	0.499509	0.0490936	0.420223		3.36316	3.89687	3.71418	1.44207	0.908361	1.09105	1.14716	0.271241		7.1376	1.35803	3.69432	-3.61966	2.15991	-0.176376	-0.545373	2.9074		-0.804946	0.0490936	1.14716	-0.545373	-0.377926	0.300892
CAAGGCTGCTACTGACTCAAT	1110034G24Rik	TRCN0000092993	3.73576	3.2373	4.07911	2.64669		4.14325	4.25636	3.31883	-0.407482	-0.520597	0.416936	-0.170381	0.511766		4.12882	3.42704	5.33337	-0.891517	-0.189744	-2.09606	-1.05911	0.964147		4.52755	2.91444	3.98324	-0.448442	1.16466	0.0958706	0.270697	0.82064		3.28769	4.9921	2.89428	-0.641004	-2.34541	-0.247599	-1.078	1.11509		-0.170381	-1.05911	0.270697	-1.078	-0.614745	-0.403654
GACTTCGGAAATCCCTGGATA	1110034G24Rik	TRCN0000092997	2.9949	3.35278	3.04482	3.20242		3.02726	3.27271	2.17723	-0.0323581	-0.277804	0.817678	0.169172	0.574875		2.65105	2.54355	1.46691	0.701727	0.809226	1.88587	1.13228	0.654845		5.58138	4.14777	4.15584	-2.53657	-1.10295	-1.11102	-1.58351	0.825378		0.113936	1.97188	3.05056	3.08848	1.23054	0.151858	1.49029	1.48544		0.169172	1.13228	-1.58351	1.49029	0.650724	-0.0466109
GCAGAGTAGCTGCTGATGATA	1110038F14Rik	TRCN0000126664	2.97124	3.26972	3.81843	3.05996		3.12111	2.79219	3.54375	-0.149877	0.179044	-0.572508	-0.181114	0.376748		3.15115	3.39254	2.46904	0.118576	-0.122813	0.800687	0.265484	0.478957		3.73794	4.15288	3.94731	0.080484	-0.334452	-0.128878	-0.127616	0.207471		1.90273	2.64796	1.19808	1.15722	0.411996	1.86187	1.1437	0.725034		-0.181114	0.265484	-0.127616	1.1437	0.042185	0.508041
CGTCAGTGAGGCCACCAGAAA	1110038F14Rik	TRCN0000126668	3.29097	3.01308	3.82752	3.20242		1.67443	1.9366	1.50556	1.61654	1.35437	1.78541	1.58544	0.217196		2.24807	1.87552	3.23287	0.765014	1.13756	-0.219789	0.560928	0.701311		1.25912	4.05804	3.74241	2.5684	-0.230519	0.0851022	0.807661	1.53299		2.11831	0.267734	0.414495	1.08411	2.93468	2.78792	2.2689	1.02868		1.58544	0.560928	0.807661	2.2689	1.07318	1.53828
TCTGGGACAAATGGAAGCGAA	1110038F14Rik	TRCN0000126666	1.55857	1.47823	0.896828	2.11221		1.68741	2.54689	3.0304	-0.128836	-0.988324	-1.47183	-0.862997	0.680212		2.64224	3.22123	2.24872	-1.164	-1.74299	-0.770485	-1.22583	0.489193		5.24644	3.11623	3.67077	-4.34961	-2.2194	-2.77395	-3.11432	1.10514		1.32571	1.45063	1.71933	0.786501	0.661579	0.392879	0.613653	0.20114		-0.862997	-1.22583	-3.11432	0.613653	-1.04441	-1.25033
CGAAGAGTTTCGGTTCAATTT	1110038F14Rik	TRCN0000126665	2.00565	2.73205	2.22825	1.65373		2.7892	1.94789	2.39809	-0.783542	0.0577587	-0.392435	-0.372739	0.420996		2.91536	2.21861	0.64163	-0.183309	0.51344	2.09042	0.806851	1.16492		2.19638	1.62058	1.7373	0.0318742	0.607668	0.490946	0.376829	0.304387		2.646	0.0482165	3.47676	-0.992271	1.60551	-1.82303	-0.403264	1.78855		-0.372739	0.806851	0.376829	-0.403264	0.217056	-0.0132171
GCCACCCATTCGGCCCAGGTA	1110038F14Rik	TRCN0000126667	1.1998	1.8933	0.873612	0.18711		1.43383	2.59797	0.952531	-0.23403	-1.39817	0.247269	-0.461644	0.846005		0.467488	1.7853	1.10312	1.42581	0.108	0.79018	0.774664	0.659042		0.550406	3.35659	1.15827	0.323206	-2.48298	-0.284657	-0.814809	1.4763		0	0	0.373899	0.18711	0.18711	-0.186789	0.0624769	0.215871		-0.461644	0.774664	-0.814809	0.0624769	0.15651	-0.376166
CGCTCCAAGTTTGTTGAAAGT	1110049F12Rik	TRCN0000193733	4.13239	4.28568	4.06637	4.00227		3.5905	3.86478	3.91862	0.541888	0.26761	0.213767	0.341088	0.17597		3.01435	3.81033	3.64176	1.27133	0.475347	0.643919	0.796866	0.419457		3.84508	3.09515	2.2803	0.221287	0.971212	1.78607	0.992856	0.782616		0.57827	1.89487	1.26621	3.424	2.1074	2.73606	2.75582	0.65852		0.341088	0.796866	0.992856	2.75582	0.568977	1.87434
CAGGAGAATTAGAATATGCTA	1110049F12Rik	TRCN0000175286	1.88418	1.86528	1.81822	1.6053		2.3735	1.2893	0.905284	-0.489319	0.59488	0.978898	0.361486	0.761426		0.819995	1.1834	1.21177	1.04529	0.681882	0.653515	0.793561	0.218462		0.0926903	0.323675	0.69238	1.72553	1.49454	1.12584	1.44864	0.302469		0.410021	0.458219	0.858848	1.19528	1.14708	0.746453	1.02961	0.246398		0.361486	0.793561	1.44864	1.02961	0.577524	1.23912
GCTCCTGTTTAATATTCCGTT	1110049F12Rik	TRCN0000193516	4.91572	4.76657	4.72156	4.7456		5.13181	5.59378	5.91622	-0.216089	-0.678055	-1.0005	-0.631547	0.394267		6.15819	5.43193	5.35524	-1.39162	-0.665358	-0.58867	-0.881882	0.443106		4.70687	5.02246	6.4723	0.0146971	-0.300902	-1.75074	-0.678982	0.94149		6.47946	5.35041	4.57619	-1.73386	-0.604812	0.169409	-0.723088	0.957131		-0.631547	-0.881882	-0.678982	-0.723088	-0.756714	-0.701035
CAGACACACTTCATTTCTTAA	1110049F12Rik	TRCN0000174263	3.74626	4.53277	4.17481	3.39514		4.00496	2.89497	3.77488	-0.258698	0.851293	-0.0286232	0.187991	0.585843		4.0139	3.47731	3.8963	0.518874	1.05547	0.636479	0.73694	0.282051		2.05379	5.52027	3.11282	2.12102	-1.34547	1.06199	0.612513	1.77642		4.19038	2.19173	3.54691	-0.795241	1.20341	-0.151768	0.0854678	1.02023		0.187991	0.73694	0.612513	0.0854678	0.462465	0.34899
GCAGACACACTTCATTTCTTA	1110049F12Rik	TRCN0000193499	4.87963	4.90717	4.60129	4.02699		5.43567	4.85246	4.21591	-0.556039	0.0271728	0.663719	0.0449512	0.610073		5.20992	4.99638	5.18022	-0.30275	-0.0892099	-0.273043	-0.221667	0.115669		5.66206	4.6808	4.48726	-1.06077	-0.0795085	0.114028	-0.342084	0.629879		3.38168	7.00884	2.95058	0.645306	-2.98185	1.07641	-0.420047	2.22904		0.0449512	-0.221667	-0.342084	-0.420047	-0.0883581	-0.381065
CGCTTGTCAAAGAGATCCTGA	1110051M20Rik	TRCN0000181302	3.52436	3.73207	4.00091	3.76939		4.36944	3.39328	3.91862	-0.845088	0.131079	-0.394268	-0.369426	0.488558		3.15735	4.38055	3.38757	0.574726	-0.648475	0.3445	0.0902504	0.650029		2.68734	3.98544	4.21496	1.31357	0.0154726	-0.214044	0.371666	0.823746		2.1364	0.458219	2.51944	1.63299	3.31117	1.24994	2.0647	1.09633		-0.369426	0.0902504	0.371666	2.0647	-0.139588	1.21818
GCTGAAGAGAAGGGTGAATTA	1110051M20Rik	TRCN0000198264	3.52842	3.91402	3.69473	3.73604		3.80811	3.8618	4.43134	-0.279698	-0.333383	-0.902928	-0.505336	0.345369		3.35376	2.84095	3.80096	0.560261	1.07307	0.113056	0.582129	0.48038		0.705217	1.29055	0.571701	2.98951	2.40418	3.12303	2.83891	0.382356		4.0614	4.53772	3.80534	-0.325361	-0.801676	-0.0692973	-0.398778	0.371668		-0.505336	0.582129	2.83891	-0.398778	0.0383962	1.22007
GCTGACATACATCACAGAGAA	1110051M20Rik	TRCN0000178121	4.13506	3.69276	3.53744	3.91225		3.55908	3.78831	3.73491	0.57598	0.346749	0.40015	0.44096	0.119941		2.88579	3.01551	3.31229	0.806974	0.677251	0.380466	0.621564	0.218639		2.99412	0.394397	3.09651	0.543314	3.14304	0.440927	1.37576	1.53136		1.54471	4.20701	2.55619	2.36754	-0.294767	1.35605	1.14294	1.34389		0.44096	0.621564	1.37576	1.14294	0.531262	1.25935
GAGGCTGACTTTCTATGGATT	1110051M20Rik	TRCN0000198312	3.66377	3.75516	4.23069	3.0896		4.46674	4.28559	5.1778	-0.802975	-0.621822	-1.51404	-0.979611	0.471606		5.73128	5.0651	5.73109	-1.97613	-1.30994	-1.97593	-1.754	0.384566		5.67054	5.13	6.85823	-1.43985	-0.899303	-2.62754	-1.65556	0.88408		1.40246	3.80556	3.67356	1.68713	-0.715965	-0.583966	0.129067	1.35094		-0.979611	-1.754	-1.65556	0.129067	-1.3668	-0.763248
GCTCTATGCTACCAGCTACTT	1110057K04Rik	TRCN0000182700	3.78071	3.91402	3.68809	4.00538		1.88058	2.20484	1.52132	1.90013	1.57586	2.25939	1.91179	0.341913		2.04898	2.83454	1.19422	1.86504	1.07948	2.7198	1.88811	0.820402		0.301294	1.13402	0	3.3868	2.55407	3.68809	3.20965	0.587397		1.55819	0.346971	0.767778	2.44719	3.65841	3.2376	3.1144	0.614936		1.91179	1.88811	3.20965	3.1144	1.89995	3.16203
GCAGTGAGCAAAGGATGCTAA	1110057K04Rik	TRCN0000182427,TRCN0000353524	4.54687	4.38275	4.09425	5.53134		3.77202	3.14605	3.71449	0.774849	1.40082	0.832375	1.00268	0.345995		2.51278	3.34821	3.02026	1.86996	1.03454	1.36249	1.42233	0.420913		3.84508	3.45086	2.94076	0.249171	0.643393	1.15349	0.682017	0.453394		2.24041	3.42223	2.47215	3.29092	2.10911	3.05919	2.81974	0.626237		1.00268	1.42233	0.682017	2.81974	1.21251	1.75088
CCCGGTATGGATAATCTCTCA	1110057K04Rik	TRCN0000200248,TRCN0000328582	2.68152	2.85111	2.16272	2.55617		2.35735	2.36507	1.26477	0.324165	0.316445	1.41674	0.685784	0.63304		2.44343	2.74163	1.34497	0.407683	0.109482	1.50614	0.674434	0.735547		3.84174	1.04889	1.77879	-1.67902	1.11384	0.383938	-0.0604155	1.44848		1.15875	1.84114	1.58352	1.39742	0.715032	0.972657	1.02837	0.344587		0.685784	0.674434	-0.0604155	1.02837	0.680109	0.483977
CCTTGCTTATAGAGCAGGCTT	1110057K04Rik	TRCN0000200208	3.9232	3.40236	2.64639	3.11864		4.04584	4.30328	4.31866	-0.122637	-0.38008	-0.395453	-0.29939	0.153265		4.3561	5.09223	4.58951	-0.95374	-1.68987	-1.18714	-1.27692	0.376185		4.54815	5.25878	4.61108	-1.90177	-2.61239	-1.96469	-2.15962	0.393377		3.966	2.52557	3.83555	-0.847365	0.593065	-0.71691	-0.323736	0.796649		-0.29939	-1.27692	-2.15962	-0.323736	-0.788154	-1.24168
TATGGTCTGAATGGTCAAATA	1110057K04Rik	TRCN0000328584	2.06276	3.259	2.00073	1.46761		0.807248	1.17861	2.55938	1.25551	0.884147	-0.496625	0.547677	0.923256		0.0541816	0.432486	1.32898	3.20481	2.82651	1.93002	2.65378	0.654716		2.07666	0	3.22211	-0.0759331	2.00073	-1.22138	0.234473	1.63333		0.969914	0	0.199029	0.497695	1.46761	1.26858	1.07796	0.512284		0.547677	2.65378	0.234473	1.07796	1.60073	0.656217
GCGAGATGATGACATCATAAA	1110057K04Rik	TRCN0000328524	3.09685	3.03839	1.60923	1.94068		2.68952	1.9591	0.998279	0.40733	1.13775	2.09857	1.21455	0.848232		1.66966	1.38994	1.32898	1.36874	1.64846	1.70941	1.57554	0.181669		2.56326	0.811095	3.12895	-0.954027	0.798135	-1.51972	-0.558537	1.20848		1.85983	0.939316	2.82821	0.0808495	1.00136	-0.887532	0.0648926	0.944547		1.21455	1.57554	-0.558537	0.0648926	1.39504	-0.246822
AGGTTCTGGCCATAGAAGACG	1110059E24Rik	TRCN0000377017	1.934	2.66862	2.69355	3.4046		1.68741	2.77961	2.10588	0.246599	-0.845602	-0.171875	-0.256959	0.551049		2.90802	1.99535	2.33132	-0.239399	0.673278	0.337306	0.257061	0.4616		1.06687	0.323675	2.21128	1.62668	2.36988	0.482274	1.49294	0.950881		0	0.0482165	1.54746	3.4046	3.35639	1.85714	2.87271	0.87984		-0.256959	0.257061	1.49294	2.87271	5.10007e-05	2.18283
GAGATCGTTATTCCGTTTAAT	1110059E24Rik	TRCN0000191632	4.00997	4.75898	4.78981	4.91741		4.5203	4.67523	3.93929	-0.510335	-0.665263	0.0706755	-0.368307	0.387982		4.70626	4.61376	5.31115	0.0527207	0.145222	-0.552169	-0.118075	0.37877		5.26647	4.58578	2.88487	-0.476661	0.204033	1.90494	0.544103	1.22668		3.116	3.15133	3.56054	1.80141	1.76608	1.35687	1.64145	0.247089		-0.368307	-0.118075	0.544103	1.64145	-0.243191	1.09278
TCATGATGGAGTATGTCAGCG	1110059E24Rik	TRCN0000376944	1.75154	0.947673	0.964315	2.40406		0	0.99481	0.753485	1.75154	0.756725	0.99805	1.16877	0.518913		0.582565	0.466063	0	0.365108	0.481611	0.947673	0.598131	0.308267		0.0926903	1.39772	0	0.871625	-0.433402	0.964315	0.467513	0.78159		0	0	0	2.40406	2.40406	2.40406	2.40406	0		1.16877	0.598131	0.467513	2.40406	0.88345	1.43579
CCTGACAACACCAAGTCAATT	1110059E24Rik	TRCN0000366529	0.540005	0.362635	1.14968	0.272288		0.428779	0	0.128988	0.111225	0.540005	0.411017	0.354082	0.219986		0.106402	0	0.291646	0.256233	0.362635	0.0709887	0.229952	0.147589		0	0.323675	0	1.14968	0.826004	1.14968	1.04179	0.186874		0	0	0	0.272288	0.272288	0.272288	0.272288	0		0.354082	0.229952	1.04179	0.272288	0.292017	0.657037
CGTACAATCATGTGTAATGAT	1110059E24Rik	TRCN0000190999	4.97494	5.06329	4.62581	4.58215		5.45382	4.75134	5.33649	-0.478881	0.223602	-0.361553	-0.205611	0.37631		5.52853	5.44882	5.25089	-0.465233	-0.385531	-0.187593	-0.346119	0.142955		5.89547	4.29367	4.48099	-1.26965	0.332142	0.14482	-0.26423	0.875745		4.21825	3.77723	4.6503	0.363898	0.804913	-0.0681488	0.366887	0.436539		-0.205611	-0.346119	-0.26423	0.366887	-0.275865	0.0513285
ACACTACACACACGTACAATC	1110059E24Rik	TRCN0000366594	1.57436	3.03839	2.65322	1.27467		3.29652	2.04575	3.12107	-1.72215	-0.471386	-1.54671	-1.24675	0.677189		1.42432	2.68572	1.9155	1.61407	0.352672	1.12289	1.02988	0.635823		2.15399	3.76296	0.133899	0.499235	-1.10974	2.51932	0.636274	1.81841		1.75835	0.140069	2.719	-0.483685	1.1346	-1.44434	-0.264475	1.30337		-1.24675	1.02988	0.636274	-0.264475	-0.108435	0.185899
CCTCGGGTATGTGACTCATTA	1110059E24Rik	TRCN0000376943	1.35417	1.44076	1.16888	1.27467		0.964775	1.21646	0	0.389391	0.137707	1.35417	0.627088	0.64212		0.426994	0.942277	0.692516	1.01376	0.49848	0.748241	0.753495	0.257681		1.17682	0.526219	0.133899	-0.00794263	0.642659	1.03498	0.556565	0.526764		0.149999	0.140069	0	1.12467	1.1346	1.27467	1.17798	0.0838823		0.627088	0.753495	0.556565	1.17798	0.690291	0.867271
ACTCTTACCACATAATGTGTA	1110059E24Rik	TRCN0000379292	1.72348	2.21524	1.95722	1.48556		0.734089	2.10748	3.50069	0.989388	-0.384008	-1.77721	-0.39061	1.38331		2.33817	2.35031	3.52026	-0.12293	-0.13507	-1.30502	-0.521005	0.679		4.96312	2.69386	1.79235	-3.0059	-0.736641	0.16487	-1.19256	1.63381		1.40246	0	2.15032	0.0830923	1.48556	-0.664764	0.301295	1.09164		-0.39061	-0.521005	-1.19256	0.301295	-0.455807	-0.445631
GTTCTTGAGTGGCGTGTAAAG	1110059E24Rik	TRCN0000366593	1.99396	1.77781	1.55188	0.142558		1.73818	0.27572	0.522515	0.255779	1.71824	1.47144	1.14849	0.782893		1.29529	0.843539	1.21177	0.482527	0.934275	0.566047	0.66095	0.240362		1.39273	0.461813	0	0.159158	1.09007	1.55188	0.933704	0.709407		0	0	0.151786	0.142558	0.142558	-0.00922807	0.0919627	0.0876337		1.14849	0.66095	0.933704	0.0919627	0.904718	0.512833
GCGTGTAAAGTACAGCAAATA	1110059E24Rik	TRCN0000191480	3.28618	3.55923	3.30122	3.01123		1.936	2.39013	1.52132	1.35018	0.896054	1.76487	1.33703	0.434555		2.06226	1.91253	2.09644	1.49697	1.64671	1.46279	1.53549	0.0978215		2.28744	2.78881	2.59866	1.01378	0.512408	0.702553	0.742914	0.253112		2.47884	2.60831	0.703706	0.532394	0.402922	2.30753	1.08095	1.06422		1.33703	1.53549	0.742914	1.08095	1.43626	0.911931
GAAGTTCTTGAGTGGCGTGTA	1110059E24Rik	TRCN0000189911	5.12324	4.53722	4.71341	3.37602		5.43182	5.18866	5.54063	-0.308576	-0.0654237	-0.417387	-0.263795	0.180204		5.89239	5.48305	5.7417	-1.35517	-0.945833	-1.20448	-1.16849	0.207027		5.47563	6.344	6.47756	-0.76222	-1.63058	-1.76415	-1.38565	0.544022		6.1383	4.25659	4.56496	-2.76228	-0.880571	-1.18894	-1.6106	1.00923		-0.263795	-1.16849	-1.38565	-1.6106	-0.716144	-1.49812
CCTGTGAATTAGCACAGTATT	1110067D22Rik	TRCN0000111115,TRCN0000326067	3.00076	3.52383	3.74677	2.76897		1.903	3.27271	1.47353	1.09776	-0.271948	1.52723	0.784347	0.939644		3.21794	1.9003	2.6278	0.305887	1.62353	0.896026	0.941815	0.660015		2.69476	2.11522	0	1.05201	1.63155	3.74677	2.14344	1.41843		3.47349	0.458219	0.829125	-0.70452	2.31075	1.93984	1.18202	1.64429		0.784347	0.941815	2.14344	1.18202	0.863081	1.66273
GCTGCTCAGAAACTCTTGTAT	1110067D22Rik	TRCN0000111117,TRCN0000326066	3.71454	3.4597	3.36919	4.27674		3.07742	3.34283	3.38059	0.637122	0.371707	0.333949	0.447593	0.165219		2.92266	3.04358	2.9488	0.537036	0.416116	0.510893	0.488015	0.0636239		2.67989	3.68751	2.55158	0.689299	-0.318323	0.817616	0.396197	0.62211		5.56354	3.03052	1.12658	-1.2868	1.24623	3.15017	1.03653	2.2259		0.447593	0.488015	0.396197	1.03653	0.467804	0.716364
GCCGTGGTGAAACTTGATGAT	1110067D22Rik	TRCN0000111116,TRCN0000325991	0.692527	0.777729	0.751575	0.845		1.02735	4.28781	0.905284	-0.334827	-3.59528	-0.212757	-1.38096	1.91864		1.54275	0.791515	1.15847	-0.765023	-0.0137856	-0.380737	-0.386515	0.375652		1.61215	2.78881	2.58314	-0.860571	-2.03723	-1.83156	-1.57646	0.628445		1.41734	0.267734	0.199029	-0.572336	0.577266	0.645971	0.216967	0.684419		-1.38096	-0.386515	-1.57646	0.216967	-0.883736	-0.679744
CAGTCGGCAATCCCTTACTTT	1110067D22Rik	TRCN0000111119,TRCN0000354081	2.12843	2.14707	1.80601	1.88767		2.39739	1.98126	2.37226	-0.268965	0.14717	-0.243834	-0.121876	0.233339		1.95243	2.09529	2.55405	0.194642	0.0517774	-0.406978	-0.0535197	0.314328		1.515	2.1565	2.33694	0.291007	-0.350492	-0.530928	-0.196805	0.431983		0.821285	2.4998	2.3623	1.06639	-0.612128	-0.474632	-0.0067909	0.931939		-0.121876	-0.0535197	-0.196805	-0.0067909	-0.0876979	-0.101798
CCACGACTGATAGTTCCATTT	1110067D22Rik	TRCN0000111118,TRCN0000325994	3.07481	3.54164	3.67136	3.71718		2.10994	3.57179	2.87967	0.964868	-0.496979	0.195142	0.22101	0.731267		2.62444	2.35031	2.03861	0.917201	1.19133	1.50303	1.20385	0.293114		1.23898	3.60045	2.87215	2.43238	0.070912	0.799209	1.10083	1.20928		5.02605	7.81531	5.70651	-1.30888	-4.09814	-1.98933	-2.46545	1.45431		0.22101	1.20385	1.10083	-2.46545	0.712431	-0.682307
CCTTCAGTGATGAGAAGCTGA	1190002H23Rik	TRCN0000088387	2.91031	2.34263	2.66002	3.2186		2.82487	2.16668	2.70444	0.0854463	0.743629	0.205871	0.344982	0.35045		2.52243	3.06017	1.49585	-0.1798	-0.71754	0.846781	-0.0168528	0.794788		2.25772	2.02894	0.507351	0.402305	0.631081	2.15267	1.06202	0.951433		0	0.989569	1.07686	3.2186	2.22903	2.14174	2.52979	0.598121		0.344982	-0.0168528	1.06202	2.52979	0.164065	1.79591
GCCAAATTAGGTGACACTAAA	1190002H23Rik	TRCN0000088384	3.85047	3.4597	3.22071	3.55241		2.59627	1.37547	3.05225	1.25421	2.475	0.798222	1.50914	0.866974		3.70654	2.84095	2.65372	-0.246838	0.618749	0.805982	0.392631	0.561653		1.27898	1.81358	1.80579	1.94173	1.40713	1.41492	1.58792	0.306429		1.06742	1.15283	0.199029	2.48499	2.39958	3.35338	2.74598	0.527752		1.50914	0.392631	1.58792	2.74598	0.950888	2.16695
CGAAGACTTCATTGCCGATCT	1190002H23Rik	TRCN0000088385	2.71039	1.44076	1.348	3.23461		2.05092	1.78111	1.08564	0.659479	0.92928	1.62475	1.07117	0.498035		1.42432	2.0068	1.93676	0.0164377	-0.566043	-0.496006	-0.348537	0.318011		1.17682	1.32716	0.0906321	0.171184	0.0208426	1.25737	0.483133	0.674711		3.64755	0.777118	0.829125	-0.412943	2.45749	2.40548	1.48334	1.64244		1.07117	-0.348537	0.483133	1.48334	0.361317	0.983239
CTCGAAGACTTCATTGCCGAT	1190002H23Rik	TRCN0000088386	0.0906555	0	0.0422563	0		0.119719	0.0842967	0.128988	-0.0290639	0.00635881	-0.0383326	-0.0203459	0.0235867		0.156798	0.0451324	0	-0.156798	-0.0451324	0	-0.0673101	0.0807172		0	0.170896	0.0906321	0.0422563	-0.128639	-0.0483757	-0.0449196	0.0855002		0.317916	0	0.601923	-0.317916	0	-0.601923	-0.306613	0.301121		-0.0203459	-0.0673101	-0.0449196	-0.306613	-0.043828	-0.175766
GCACAGCATCAAAGGGATGAA	1190005F20Rik	TRCN0000126968	4.07248	4.39749	4.04054	4.28702		3.44908	3.62904	3.96832	0.623398	0.44344	0.10416	0.390332	0.263661		3.60129	2.82809	3.89358	0.796207	1.5694	0.503915	0.956507	0.550534		2.95144	3.41729	3.11282	1.0891	0.623254	0.92772	0.880024	0.236556		2.05314	0.0948736	3.92608	2.23387	4.19214	0.360937	2.26232	1.91576		0.390332	0.956507	0.880024	2.26232	0.67342	1.57117
GCCACTGGAATAATGGGATTA	1190005F20Rik	TRCN0000126967	4.52468	4.06944	4.16528	3.61897		4.28018	4.40717	4.94503	0.244506	0.117509	-0.420351	-0.019445	0.352953		3.38051	3.91129	4.03338	0.688927	0.158146	0.0360589	0.294377	0.3471		2.97598	4.41769	3.4489	1.18929	-0.252415	0.716378	0.551086	0.734931		2.97233	3.41305	2.41327	0.646636	0.205914	1.20569	0.68608	0.501055		-0.019445	0.294377	0.551086	0.68608	0.137466	0.618583
CGGTGCAACAAAGGTATAGAA	1190005F20Rik	TRCN0000126966	0.295122	0.192682	0.408118	0.230327		0.603256	0.706458	0.32124	-0.308134	-0.411336	-0.0261181	-0.248529	0.199406		0.819995	0.53096	0.534134	-0.627313	-0.338278	-0.341452	-0.435681	0.165966		0.734281	0.461813	0.907117	-0.326163	-0.0536953	-0.498999	-0.292953	0.224502		0.253075	1.13061	2.02483	-0.022748	-0.900279	-1.79451	-0.905844	0.885893		-0.248529	-0.435681	-0.292953	-0.905844	-0.342105	-0.599399
GTTCTTCTCAGGGTTCTGTAT	1190005F20Rik	TRCN0000126964	4.02154	4.42654	3.91255	3.70956		1.60773	1.72969	1.65586	2.41381	2.29184	2.36568	2.35711	0.0614309		1.36125	0.843539	1.68363	3.0653	3.583	2.74291	3.1304	0.423814		1.15549	1.17477	0.0460276	2.75706	2.73778	3.86653	3.12046	0.646187		4.42738	0	1.33127	-0.717823	3.70956	2.37829	1.79001	2.27156		2.35711	3.1304	3.12046	1.79001	2.74376	2.45523
GCCAGTTCATTGAACTCAGAT	1190005F20Rik	TRCN0000126965	4.23781	4.60655	3.55213	4.12757		4.04079	3.96268	3.4726	0.197019	0.275132	0.765213	0.412454	0.307984		3.36452	3.12466	3.1579	1.24204	1.48189	1.44866	1.39086	0.129952		3.76284	2.49902	3.6298	-0.210707	1.05311	-0.0776692	0.254912	0.694455		3.27957	3.85384	3.03762	0.847995	0.273731	1.08995	0.737225	0.419231		0.412454	1.39086	0.254912	0.737225	0.901658	0.496068
CAAGCAAGTCTGGATGGATGA	1190005I06Rik	TRCN0000195753,TRCN0000323512	3.12929	3.49669	3.62345	3.78034		3.06753	1.05871	1.67006	0.0617642	2.07058	1.45923	1.19719	1.02972		2.2364	2.39458	1.6454	1.2603	1.10211	1.85129	1.40457	0.394877		0.448861	1.56034	0.80374	3.17459	2.06311	2.81971	2.68581	0.567711		1.90273	0.183891	0.373899	1.8776	3.59644	3.40644	2.96016	0.942325		1.19719	1.40457	2.68581	2.96016	1.30088	2.82298
GAGCGTGCCCAACATTATCAT	1190005I06Rik	TRCN0000184517	3.34722	3.19291	3.33985	3.97712		1.40269	1.44088	0.128988	1.94452	1.90633	3.21823	2.35636	0.746642		0.788376	2.29533	1.80422	2.40453	0.897571	1.38869	1.5636	0.768555		0.517346	1.43174	0	2.8225	1.9081	3.33985	2.69015	0.724988		1.41734	1.53765	1.02537	2.55978	2.43947	2.95175	2.65033	0.267877		2.35636	1.5636	2.69015	2.65033	1.95998	2.67024
CAGCAACAACAACCACGACGA	1190005I06Rik	TRCN0000374761	1.84565	2.4217	0.986127	1.95363		1.72565	2.22355	2.89184	0.120001	-0.377899	-1.04618	-0.434694	0.585164		0.298212	1.7032	1.72088	2.12349	0.718499	0.700823	1.18094	0.816322		2.2776	0	1.45974	-1.29147	0.986127	-0.473613	-0.259652	1.15377		1.00971	0	1.10193	0.943918	1.95363	0.851696	1.24975	0.611321		-0.434694	1.18094	-0.259652	1.24975	0.373122	0.495048
GCGTGCCCAACATTATCATCA	1190005I06Rik	TRCN0000184234	1.97027	2.25897	1.92371	1.8466		0.459364	1.17861	0.975586	1.51091	0.791664	0.994688	1.09909	0.370814		1.10306	2.08452	1.17645	1.1559	0.174444	1.08251	0.804287	0.546693		1.93364	2.77562	0.633302	-0.00992859	-0.851915	1.2904	0.142854	1.0793		0.0769479	0.385015	0.102944	1.76965	1.46159	1.74366	1.6583	0.170853		1.09909	0.804287	0.142854	1.6583	0.951687	0.900576
TGGATGGCCAGAAGAGTACAG	1190005I06Rik	TRCN0000374760	0.721188	0.89322	0.919676	0.759074		0.428779	0.595935	0.284785	0.292409	0.125253	0.436403	0.284688	0.155719		0.426994	1.14245	0.15318	0.466225	-0.249232	0.740039	0.319011	0.510802		1.65837	0	1.07192	-0.738694	0.919676	-0.152239	0.00958141	0.840944		1.15875	0	0.199029	-0.39968	0.759074	0.560045	0.30648	0.619596		0.284688	0.319011	0.00958141	0.30648	0.30185	0.158031
GTCTTATCAAGACGATGGAGA	1190005I06Rik	TRCN0000180434	3.49146	3.2373	2.50246	2.33644		2.47428	2.26929	3.43982	1.01718	1.22217	0.0516409	0.763663	0.62509		3.49756	3.69471	1.93676	-0.260264	-0.457411	1.30054	0.194288	0.963098		0.517346	2.23568	5.49781	1.98512	0.266785	-2.99535	-0.247815	2.52979		2.2151	0.493474	2.85057	0.121341	1.84297	-0.514128	0.483395	1.21955		0.763663	0.194288	-0.247815	0.483395	0.478975	0.11779
TCCTGAATGACAAGCACCTGA	1190005I06Rik	TRCN0000374693	2.25142	2.3014	2.11403	1.97919		2.21225	2.27826	1.02062	0.0391695	-0.0268373	1.2308	0.414379	0.707815		1.96662	2.73476	2.13374	0.334781	-0.433353	0.167659	0.0230288	0.403975		2.14319	2.622	2.86575	-0.0291628	-0.507976	-0.751723	-0.429621	0.367598		3.80569	3.98348	0.767778	-1.8265	-2.00429	1.21141	-0.873126	1.80745		0.414379	0.0230288	-0.429621	-0.873126	0.218704	-0.651374
GGCCCTCTTCTGGATCATCTT	1190007F08Rik	TRCN0000346868	2.52776	2.25897	2.32556	3.04793		2.07086	2.43897	3.3849	0.456901	0.0887892	-0.857141	-0.103817	0.677864		3.24148	2.27653	3.80675	-0.982518	-0.0175678	-1.54778	-0.849289	0.773758		3.25702	1.76102	4.31704	-0.931453	0.564538	-1.99147	-0.78613	1.28419		0.439461	0.0948736	1.65302	2.60847	2.95306	1.39491	2.31881	0.818464		-0.103817	-0.849289	-0.78613	2.31881	-0.476553	0.766341
TAACGACTGTGGCTCCTATTT	1190007F08Rik	TRCN0000346869	2.14967	1.94775	2.69355	0.501253		1.79923	2.21423	1.26477	0.350439	-0.0645601	0.884893	0.390257	0.475977		2.95862	3.52588	3.71435	-1.01087	-1.57813	-1.7666	-1.45187	0.39337		2.9881	0.958419	0	-0.29455	1.73513	2.69355	1.37804	1.52572		1.34139	0.140069	0.566335	-0.840139	0.361184	-0.0650821	-0.181346	0.609042		0.390257	-1.45187	1.37804	-0.181346	-0.530805	0.598349
TACGTGCACAAGTGCAAATAA	1190007F08Rik	TRCN0000346870	2.62955	1.40228	2.78349	2.29634		1.5234	1.27143	1.39019	1.10615	1.35811	1.23936	1.23454	0.126052		0.939963	1.01213	0.561768	0.462317	0.390146	0.840512	0.564325	0.241892		0.376963	0.910963	1.07192	2.40653	1.87253	1.71158	1.99688	0.363781		0.775847	0	0	1.52049	2.29634	2.29634	2.03772	0.447935		1.23454	0.564325	1.99688	2.03772	0.899432	2.0173
TGAAGTCAGCATGACCGCCAT	1190007F08Rik	TRCN0000346873	3.2473	2.02576	2.43269	2.13513		2.90482	2.5763	4.57978	0.342474	0.670997	-1.33248	-0.106338	1.0745		2.58817	0.918219	3.30414	-0.562417	1.10754	-1.27838	-0.244421	1.22433		2.05379	0.758443	4.71267	0.378906	1.67425	-2.27998	-0.0756077	2.01592		0	0.183891	1.33127	2.13513	1.95124	0.803868	1.63008	0.721406		-0.106338	-0.244421	-0.0756077	1.63008	-0.175379	0.777237
GGAAGAAGCCTCATGCTATAG	1190007F08Rik	TRCN0000346872	3.30524	3.03839	2.77098	3.1301		0.157516	1.81851	0.0442899	3.14772	1.48673	3.26095	2.6318	0.993277		0.0541816	0.709783	0.15318	2.98421	2.32861	2.88521	2.73268	0.353416		0	0.703797	0	2.77098	2.06718	2.77098	2.53638	0.406337		0	0	0	3.1301	3.1301	3.1301	3.1301	5.43896e-16		2.6318	2.73268	2.53638	3.1301	2.68224	2.83324
CGGCACCTGGAAACACTTATA	1200009I06Rik	TRCN0000111539	2.2902	2.53274	2.72632	2.81937		2.36545	2.74117	1.93997	-0.0752505	-0.450975	0.350231	-0.0586648	0.40086		1.83353	1.47486	2.81741	0.699204	1.05788	-0.284677	0.490802	0.695118		1.70316	1.00436	1.09399	1.02316	1.72196	1.63233	1.45915	0.380227		1.02921	0.5615	1.30991	1.79016	2.25787	1.50946	1.8525	0.378077		-0.0586648	0.490802	1.45915	1.8525	0.216069	1.65582
CCTGAGAACTTCAACCCACAA	1200009I06Rik	TRCN0000111538	2.51963	2.93437	3.04482	4.17811		2.27378	2.41476	3.58556	0.245849	0.104869	-1.06593	-0.238405	0.720117		3.89647	3.05466	2.77082	-0.9621	-0.120293	0.163549	-0.306281	0.585419		3.62996	3.11623	3.24695	-0.585145	-0.0714121	-0.202137	-0.286231	0.266991		1.7348	1.89487	1.37306	2.44331	2.28324	2.80505	2.51053	0.267318		-0.238405	-0.306281	-0.286231	2.51053	-0.272343	1.11215
CCTCTATTTAAGGTGCTATAT	1200009I06Rik	TRCN0000111536	4.42585	4.68478	4.95514	3.5609		4.28872	5.03828	4.23753	0.137132	-0.612429	0.188321	-0.0956585	0.448267		5.81507	4.67247	4.14263	-1.13029	0.0123117	0.542145	-0.191943	0.854721		3.39081	3.49979	3.82723	1.56433	1.45535	1.1279	1.38253	0.227143		4.08022	4.62376	2.69449	-0.519316	-1.06286	0.866412	-0.238589	0.994801		-0.0956585	-0.191943	1.38253	-0.238589	-0.143801	0.571969
GATGAGGCATTCCGGGCATTT	1200009I06Rik	TRCN0000111535	4.62289	4.30666	4.91164	5.24036		4.66181	4.02533	4.41246	-0.038927	0.597558	0.210427	0.256353	0.320718		3.78473	3.10348	2.9383	0.521934	1.20318	1.36836	1.03116	0.44867		4.89397	4.52797	4.57817	0.0176673	0.383667	0.333464	0.244932	0.198412		2.97233	2.93758	2.94366	2.26803	2.30279	2.2967	2.28917	0.0185588		0.256353	1.03116	0.244932	2.28917	0.643756	1.26705
CGTGCTAATCACCTGCATCTA	1200009I06Rik	TRCN0000111537	1.62074	1.74744	1.90092	1.96647		1.78722	0.124667	0.128988	-0.166485	1.49607	1.49175	0.940446	0.958632		0.252597	0.0888957	0.116383	1.49484	1.65854	1.63106	1.59481	0.0876623		0	0	0	1.90092	1.90092	1.90092	1.90092	0		0	0.422081	0.199029	1.96647	1.54439	1.76744	1.75943	0.211155		0.940446	1.59481	1.90092	1.75943	1.26763	1.83018
CATCACTTATGATCGTGTATT	1200011M11Rik	TRCN0000306296	2.80045	1.61911	1.22499	4.09287		2.85968	4.43754	4.54553	-0.0592325	-1.63709	-1.74508	-1.14713	0.943697		4.28141	3.09278	2.22299	-2.6623	-1.47367	-0.603881	-1.57995	1.03332		1.13384	0.861893	3.73189	0.0911473	0.363096	-2.5069	-0.68422	1.58434		0.0769479	1.53765	2.627	4.01592	2.55522	1.46587	2.679	1.27952		-1.14713	-1.57995	-0.68422	2.679	-1.36354	0.99739
CGCAGACTGAAGCTGCTGTTT	1200011M11Rik	TRCN0000124119,TRCN0000326753	3.16102	3.31185	3.63731	3.54815		2.22121	3.17517	2.55173	0.939812	-0.0141558	0.609286	0.511647	0.484421		1.84894	1.85031	3.02523	1.46291	1.46154	0.286615	1.07035	0.678737		0.550406	2.02894	0	3.0869	1.60836	3.63731	2.77752	1.04925		1.44663	1.03813	0	2.10152	2.51002	3.54815	2.71989	0.745801		0.511647	1.07035	2.77752	2.71989	0.791	2.74871
GCCATTAAGGATTGCCCAGTT	1200011M11Rik	TRCN0000124122	3.96574	4.06328	4.72643	4.0543		2.45164	2.07695	2.10588	1.5141	1.8888	1.85986	1.75425	0.20848		2.48347	2.26704	1.86093	1.57982	1.79624	2.20235	1.85947	0.316046		2.08797	0.861893	3.1659	2.63846	3.86454	1.56053	2.68784	1.15279		0.185182	0.140069	0.916516	3.86912	3.91423	3.13779	3.64038	0.435843		1.75425	1.85947	2.68784	3.64038	1.80686	3.16411
GCCACATTATGCTCAACTTAT	1200011M11Rik	TRCN0000124121,TRCN0000326752	4.80461	4.96772	4.47393	4.5569		3.71929	3.87369	2.4484	1.08532	0.930919	2.35621	1.45748	0.782142		1.9946	2.83454	3.13509	2.97311	2.13318	1.83263	2.31297	0.591118		1.58049	0.958419	0.133899	2.89345	3.51551	4.34003	3.583	0.725651		3.84472	1.39579	2.48173	0.712183	3.16112	2.07517	1.98282	1.22708		1.45748	2.31297	3.583	1.98282	1.88523	2.78291
CCAGTCAAACTTGCCGCATAA	1200011M11Rik	TRCN0000124120,TRCN0000326751	2.2902	1.51476	2.19117	1.66951		1.44915	1.40855	1.56757	0.841049	0.881651	0.722626	0.815109	0.0826254		1.29529	0.893753	0.477225	0.219476	0.621011	1.03754	0.626008	0.409054		1.29857	0.811095	0	0.892602	1.38008	2.19117	1.48795	0.655972		0.928988	0.346971	0.151786	0.740526	1.32254	1.51773	1.1936	0.404327		0.815109	0.626008	1.48795	1.1936	0.720558	1.34077
TTGTGGGAAATTGGATCATAT	1200011M11Rik	TRCN0000311509	1.35417	1.19281	1.67785	0.872541		0.630389	0.0842967	1.39019	0.723777	1.26987	-0.0360201	0.652542	0.655853		0	0.817762	0	1.19281	0.375048	1.19281	0.920222	0.472135		0.221434	0	1.94591	1.45641	1.67785	-0.268063	0.9554	1.06532		0	0	0	0.872541	0.872541	0.872541	0.872541	1.35974e-16		0.652542	0.920222	0.9554	0.872541	0.786382	0.913971
CAGTCAAACTTGCCGCATAAT	1200011M11Rik	TRCN0000124123	2.7457	2.66862	2.2644	1.81855		1.23605	1.05871	1.61239	1.50964	1.68698	1.13331	1.44331	0.282736		0.850935	1.28096	0.291646	1.81769	1.38767	2.37698	1.86078	0.496062		2.97598	0.394397	0	-0.711584	1.87	2.2644	1.14094	1.61641		0.0389869	1.921	0.199029	1.77957	-0.102442	1.61953	1.09888	1.04345		1.44331	1.86078	1.14094	1.09888	1.65204	1.11991
CCCATGAGGGCAGATAGTATA	1200014J11Rik	TRCN0000336338	2.20144	1.8933	2.07385	2.93491		0.265303	1.44088	2.00864	1.93614	0.760561	0.192805	0.963169	0.889152		1.56158	0.989222	1.1218	0.331719	0.904076	0.771494	0.669096	0.299603		0.0470894	0	0	2.02676	2.07385	2.07385	2.05815	0.0271871		0.219528	0.0482165	0.244773	2.71538	2.88669	2.69014	2.76407	0.106942		0.963169	0.669096	2.05815	2.76407	0.816132	2.41111
GCCCTTAAATCTGACATTCTT	1200014J11Rik	TRCN0000178071	2.97124	3.36283	3.03439	3.93529		0.899358	2.17632	1.58267	2.07188	0.794918	1.38857	1.41846	0.639005		0.342429	0.893753	1.21177	3.0204	2.46908	2.15107	2.54685	0.439856		1.9829	0.646999	2.07362	1.05148	2.38739	0.960769	1.46655	0.798761		1.8489	0.0948736	0.0523899	2.08639	3.84041	3.8829	3.2699	1.02517		1.41846	2.54685	1.46655	3.2699	1.98265	2.36822
GTTGGCTTGACGTCGTATAAA	1200014J11Rik	TRCN0000336336	0.0906555	0.192682	0.440077	0.0491013		0.0809064	0	0.0872605	0.00974907	0.0906555	0.00339501	0.0345999	0.0486494		0.106402	0	0	0.0862798	0.192682	0.192682	0.157214	0.0614311		0.0470894	0	0.0460276	0.392987	0.440077	0.394049	0.409038	0.0268858		0	0	0	0.0491013	0.0491013	0.0491013	0.0491013	0		0.0345999	0.157214	0.409038	0.0491013	0.0959071	0.229069
CCCTTAAATCTGACATTCTTA	1200014J11Rik	TRCN0000176445,TRCN0000336335	4.40833	4.26438	3.95188	4.54197		4.04836	2.9909	3.60417	0.359975	1.41743	0.804163	0.860522	0.530974		3.27609	4.18774	4.2527	0.988292	0.0766477	0.011687	0.358876	0.546058		3.12058	3.43417	3.4994	0.831296	0.51771	0.452477	0.600494	0.202524		5.0102	3.45836	3.88694	-0.468224	1.08361	0.65503	0.423472	0.801413		0.860522	0.358876	0.600494	0.423472	0.609699	0.511983
CCTCTTCAGATGTACATAGTA	1200014J11Rik	TRCN0000178615	3.84397	3.65235	3.94633	2.61443		1.84627	1.45678	0.284785	1.9977	2.38719	3.55919	2.64803	0.812766		0.385331	1.58593	0.224074	3.26701	2.06642	3.42827	2.92057	0.744097		1.02044	0.249307	1.85833	2.92589	3.69702	2.08799	2.90363	0.804744		0.410021	0.71873	1.02537	2.2044	1.8957	1.58906	1.89639	0.307674		2.64803	2.92057	2.90363	1.89639	2.7843	2.40001
CCAGGATATCTTCTCCTATTT	1200014J11Rik	TRCN0000178695,TRCN0000336400	4.1136	4.02581	4.16289	3.00502		3.56612	3.99842	3.95678	0.547478	0.115173	0.156817	0.273156	0.23848		3.63279	3.51389	3.81251	0.393023	0.511922	0.2133	0.372748	0.15034		3.14243	3.137	4.66185	1.02046	1.02588	-0.498961	0.515794	0.878807		3.18714	5.15646	3.0824	-0.182121	-2.15144	-0.077378	-0.803646	1.1684		0.273156	0.372748	0.515794	-0.803646	0.322952	-0.143926
TGCTAAAGGAAATAGACTATT	1200014J11Rik	TRCN0000336402	2.85965	3.36283	2.53242	3.10128		4.2586	3.97929	4.23275	-1.39895	-1.11964	-1.3731	-1.29723	0.154343		3.88156	3.82335	4.58951	-0.518725	-0.460512	-1.22667	-0.735304	0.426533		4.79571	5.01687	4.72864	-2.2633	-2.48445	-2.19622	-2.31466	0.150824		3.31574	4.97505	4.32786	-0.214458	-1.87377	-1.22657	-1.10493	0.836315		-1.29723	-0.735304	-2.31466	-1.10493	-1.01627	-1.70979
CGGATCATTTGTGATCTTGAA	1200016B10Rik	TRCN0000176536	1.75154	1.94775	1.7561	2.05326		0.921495	0.27572	1.06429	0.830041	1.47582	0.687244	0.9977	0.420171		0.0541816	0.432486	0.387418	1.89357	1.51526	1.56033	1.65639	0.206636		0.0470894	0.249307	0.856354	1.70901	1.5068	0.899748	1.37185	0.421171		0	0.307896	0.199029	2.05326	1.74537	1.85424	1.88429	0.156133		0.9977	1.65639	1.37185	1.88429	1.32704	1.62807
GAACGAGTAGTTCCGATTCTA	1200016B10Rik	TRCN0000178017	3.83744	3.70861	4.13631	3.31711		4.00237	2.695	2.61917	-0.164922	1.14244	1.21828	0.731932	0.777623		3.82034	2.93986	3.21992	-0.111728	0.768758	0.488696	0.381909	0.449851		3.71261	2.48288	3.15018	0.423701	1.65343	0.986133	1.02109	0.615608		1.37225	3.81952	3.15607	1.94486	-0.502414	0.161033	0.534491	1.26566		0.731932	0.381909	1.02109	0.534491	0.55692	0.777789
GCACGGATGATAGAAATTTAA	1200016B10Rik	TRCN0000176891	4.42803	4.33247	3.55943	3.98028		4.28659	4.58045	4.81046	0.141437	-0.152425	-0.382434	-0.131141	0.262584		5.26839	5.30084	5.55923	-0.935917	-0.968362	-1.22676	-1.04368	0.159378		3.97251	3.88464	5.11614	-0.413086	-0.325212	-1.55671	-0.765004	0.687048		5.55936	4.1639	4.84664	-1.57908	-0.183616	-0.866359	-0.87635	0.697784		-0.131141	-1.04368	-0.765004	-0.87635	-0.58741	-0.820677
GTTGTTCATCAAATGGAACTA	1200016B10Rik	TRCN0000176965	4.56081	3.77034	4.18898	3.6551		5.82728	4.75295	5.33983	-1.26647	-0.192134	-0.779015	-0.745873	0.537934		3.90386	4.92725	4.93285	-0.133517	-1.1569	-1.16251	-0.817643	0.592477		5.1964	4.32569	5.83419	-1.00742	-0.136706	-1.6452	-0.929776	0.75724		6.85105	3.19481	4.37747	-3.19596	0.460282	-0.722375	-1.15268	1.86571		-0.745873	-0.817643	-0.929776	-1.15268	-0.781758	-1.04123
GGATTATCAACTACCCTTATT	1300010F03Rik	TRCN0000346724	1.95829	3.13542	2.86226	1.92761		2.17588	2.43897	1.58267	-0.217598	-0.480687	0.375618	-0.107556	0.43863		3.33199	3.06017	2.72266	-0.196571	0.075252	0.412754	0.0971452	0.305252		3.79768	4.7329	0	-0.935412	-1.87063	2.86226	0.0187399	2.50657		0	1.58745	0.492412	1.92761	0.340161	1.4352	1.23432	0.812563		-0.107556	0.0971452	0.0187399	1.23432	-0.00520526	0.626531
CTGACTCTTAGACGCTGATAG	1300010F03Rik	TRCN0000346722	1.23997	0.947673	0.673069	0.816923		1.04762	0.124667	0.458493	0.192343	1.1153	0.781474	0.696372	0.467327		0.506876	0.62314	1.27991	0.440798	0.324533	-0.332232	0.144366	0.41682		0.0470894	0.587872	0	0.625979	0.085196	0.673069	0.461415	0.326664		0	0.0482165	0.102944	0.816923	0.768706	0.713979	0.766536	0.0515062		0.696372	0.144366	0.461415	0.766536	0.420369	0.613975
GCAGTAAAGTTGGGTCATATT	1300010F03Rik	TRCN0000363866	3.27656	2.65232	2.82038	2.42281		4.51486	3.93457	1.10668	-1.2383	-0.65801	2.16988	0.0911917	1.82343		2.66853	4.13391	4.13576	-0.0162043	-1.48159	-1.48343	-0.993743	0.846574		4.04969	3.50779	3.7939	-1.22931	-0.687407	-0.97352	-0.963411	0.271091		3.7123	1.43258	2.06364	-1.28949	0.990228	0.359171	0.01997	1.1771		0.0911917	-0.993743	-0.963411	0.01997	-0.451276	-0.471721
GGAGTAAGGAAACGCACTATT	1300010F03Rik	TRCN0000346723	3.0124	3.57662	3.42216	1.92761		2.49657	1.45678	3.41051	0.515831	1.55562	-0.398104	0.557783	0.977538		2.13948	2.10598	0.15318	1.43714	1.47064	3.42344	2.1104	1.13724		3.03557	1.96067	2.0399	0.386583	1.46149	1.38226	1.07678	0.599038		0	2.90522	0.971968	1.92761	-0.97761	0.955639	0.635212	1.47888		0.557783	2.1104	1.07678	0.635212	1.33409	0.855995
CCTTGGCGAACACTTACTATT	1300010F03Rik	TRCN0000363909	1.69486	2.12361	1.18783	1.74596		2.77102	2.9909	1.85549	-1.07616	-1.29604	-0.160626	-0.844277	0.60218		2.64224	4.31986	1.04556	-0.518629	-2.19626	1.07804	-0.545613	1.63732		3.88126	4.42193	3.41422	-2.69343	-3.23411	-2.2264	-2.71798	0.504303		1.12291	2.78232	0.414495	0.623046	-1.03636	1.33146	0.30605	1.21532		-0.844277	-0.545613	-2.71798	0.30605	-0.694945	-1.20597
GTTCCGTTTGAGACGGACATT	1300014I06Rik	TRCN0000182363	4.30325	3.70071	4.26008	3.82683		2.80118	2.695	3.04682	1.50207	1.60825	1.25643	1.45558	0.180458		2.69435	3.08199	3.24144	1.00636	0.618722	0.459271	0.694785	0.281366		2.70213	2.07273	2.91619	1.55795	2.18736	1.34389	1.6964	0.438444		0.496597	0.140069	1.15081	3.33024	3.68676	2.67602	3.23101	0.512624		1.45558	0.694785	1.6964	3.23101	1.07518	2.46371
CTTCTTTGAAAGATCGCCTTT	1300014I06Rik	TRCN0000177921	3.262	3.01308	3.66461	3.30199		3.69057	4.24725	3.36321	-0.428571	-0.985245	-0.101209	-0.505009	0.446947		2.56036	3.66249	3.51673	0.452718	-0.649408	-0.503653	-0.233447	0.598689		3.49637	4.9243	4.0832	0.16824	-1.25969	-0.418583	-0.503344	0.717729		4.51641	3.56578	2.58315	-1.21442	-0.263787	0.71884	-0.253122	0.966673		-0.505009	-0.233447	-0.503344	-0.253122	-0.369228	-0.378233
CCTTCTTTGAAAGATCGCCTT	1300014I06Rik	TRCN0000198807	4.50628	4.45031	4.57634	4.28957		4.25207	4.59129	5.28551	0.25421	-0.0850198	-0.779235	-0.203348	0.526786		5.17061	5.4572	4.42246	-0.720295	-1.00689	0.0278562	-0.566442	0.534253		4.89719	5.85405	4.69833	-0.320844	-1.27771	-0.121993	-0.573516	0.617902		5.3447	5.08314	6.08532	-1.05513	-0.793572	-1.79575	-1.21482	0.519824		-0.203348	-0.566442	-0.573516	-1.21482	-0.384895	-0.894167
GCTCTTTGGAAGAAATGGATT	1300017J02Rik	TRCN0000031400	3.07481	4.35783	3.03439	4.35937		3.48669	3.67053	3.69031	-0.411877	-0.595726	-0.615501	-0.541035	0.11229		4.49725	4.32673	4.83998	-0.139416	0.0310967	-0.482153	-0.196824	0.261397		2.28744	3.56256	2.79339	0.746952	-0.528175	0.241002	0.15326	0.642075		1.87067	0.88725	2.56524	2.48869	3.47212	1.79413	2.58498	0.843126		-0.541035	-0.196824	0.15326	2.58498	-0.368929	1.36912
CCACAGCCTGAAACCTATCAT	1300017J02Rik	TRCN0000031399	2.41825	2.61915	2.6047	1.94068		2.45923	2.84751	1.96322	-0.0409811	-0.429267	0.455024	-0.0050747	0.443238		2.54152	2.70694	1.81574	0.0776356	-0.0877849	0.803412	0.264421	0.474051		0.79071	1.09208	0	1.81399	1.51262	2.6047	1.9771	0.564017		1.22787	0.493474	0.601923	0.712804	1.4472	1.33875	1.16625	0.396425		-0.0050747	0.264421	1.9771	1.16625	0.129673	1.57168
TGTTCTAGTTTCCGTGACAAT	1300017J02Rik	TRCN0000031402	1.90931	1.23721	1.93496	1.00287		1.00679	2.59078	0.642617	0.902514	-0.681475	1.26669	0.49591	1.03578		0.0541816	0.466063	0	1.18303	0.771145	1.23721	1.06379	0.254884		1.62772	0.811095	1.8839	0.307246	1.12387	0.0510631	0.49406	0.56027		0	0.385015	0.244773	1.00287	0.617858	0.758099	0.792943	0.194858		0.49591	1.06379	0.49406	0.792943	0.779851	0.643501
GCACCTTTGGAAGGTTATTAT	1300017J02Rik	TRCN0000031401	3.82429	3.90028	3.87213	4.35449		2.27378	2.39013	2.61183	1.55052	1.43417	1.21246	1.39905	0.17174		3.42745	3.22123	3.17589	0.472826	0.679049	0.724385	0.62542	0.13408		2.50542	4.00817	3.11282	1.3667	-0.136043	0.759307	0.663323	0.755957		4.6277	4.67648	1.78273	-0.273207	-0.321991	2.57176	0.658854	1.65681		1.39905	0.62542	0.663323	0.658854	1.01223	0.661089
GCTGTGGTTAAGAAATCGGAT	1300017J02Rik	TRCN0000031403	3.02395	3.82954	2.95366	2.66255		3.41828	2.02457	3.72133	-0.394323	0.999381	-0.697378	-0.0307737	0.904917		3.71076	3.58055	3.13509	0.118783	0.24899	0.694456	0.354077	0.301881		3.26699	2.54638	3.29062	-0.313333	0.407286	-0.336963	-0.0810034	0.423036		5.00405	4.99825	2.82068	-2.3415	-2.3357	-0.158127	-1.61178	1.2589		-0.0307737	0.354077	-0.0810034	-1.61178	0.161651	-0.84639
TCAGCACAGAAATGGGTATTG	1300018I17Rik	TRCN0000341376	2.12843	2.73205	2.77098	2.62256		3.36677	1.54867	1.28337	-1.23834	0.57976	0.845054	0.0621569	1.13405		1.22617	0.13137	1.95772	1.50588	2.60068	0.774336	1.62697	0.919174		2.21711	0.811095	0	0.553866	1.95988	2.77098	1.76158	1.12178		0	0	0	2.62256	2.62256	2.62256	2.62256	0		0.0621569	1.62697	1.76158	2.62256	0.844562	2.19207
GAAGCTGCAGTGTGCGGTATA	1300018I17Rik	TRCN0000341317	2.18096	1.00015	2.99728	2.44132		2.02047	2.97443	1.52132	0.160483	-0.793476	0.659638	0.0088818	0.738324		0.506876	1.26197	0.0398466	0.49327	-0.261822	0.9603	0.397249	0.616693		1.49816	0.811095	2.11739	1.49912	2.18618	0.879886	1.52173	0.653441		0.0769479	1.90799	1.45319	2.36437	0.533331	0.988134	1.29528	0.953379		0.0088818	0.397249	1.52173	1.29528	0.203066	1.4085
GATTGGAGAAGAAGGGTATTG	1300018I17Rik	TRCN0000341318	1.60545	3.17018	2.77725	2.14646		3.08234	4.80666	4.08157	-1.47689	-3.20122	-2.47612	-2.38474	0.865787		3.02795	3.15071	3.45544	0.142237	0.0194768	-0.285256	-0.0411807	0.220107		2.11031	2.29233	2.63676	0.666939	0.484917	0.140486	0.43078	0.267369		3.28769	2.33466	2.26576	-1.14123	-0.188201	-0.1193	-0.48291	0.571162		-2.38474	-0.0411807	0.43078	-0.48291	-1.21296	-0.0260649
CAGAAGCTGAGGGCCACATAT	1300018I17Rik	TRCN0000341379	1.1998	1.74744	0.986127	2.10061		1.903	2.00308	0.929101	-0.703205	-0.803277	0.270699	-0.411927	0.593285		0.996403	0.326794	0.901603	0.751036	1.42065	0.845836	1.00584	0.362346		0.0926903	0.587872	0	0.893437	0.398255	0.986127	0.759273	0.316067		0	0.140069	0	2.10061	1.96055	2.10061	2.05392	0.0808688		-0.411927	1.00584	0.759273	2.05392	0.296956	1.4066
CTACCAAGCTTGGGAGAATAT	1300018I17Rik	TRCN0000341378	0.0460397	0	0	0		0	0	0	0.0460397	0.0460397	0.0460397	0.0460397	0		0	0	0	0	0	0	0	0		0	0	0	0	0	0	0	0		0	0	0	0	0	0	0	0		0.0460397	0	0	0	0.0230198	0
CCGAGTCCAATTGCTTGACTA	1300018J18Rik	TRCN0000201921	2.34647	2.77786	2.70675	2.22334		3.39473	2.0352	2.86122	-1.04826	0.311274	-0.514742	-0.417242	0.68499		2.27113	2.43753	2.05815	0.506731	0.34033	0.71971	0.522257	0.190166		3.59077	1.83916	3.4186	-0.884023	0.867586	-0.711856	-0.242764	0.965437		3.52589	0.0948736	0.453979	-1.30255	2.12847	1.76936	0.865095	1.8858		-0.417242	0.522257	-0.242764	0.865095	0.0525072	0.311166
GACGTGTTCTATGATGGTAAT	1300018J18Rik	TRCN0000200717	2.34647	2.82225	2.73279	1.37436		2.03069	2.09738	1.71185	0.315782	0.249096	0.634621	0.399833	0.206048		1.22617	1.22322	1.48145	1.59608	1.59903	1.3408	1.51197	0.148245		1.04384	0.758443	2.35533	1.68894	1.97434	0.377452	1.34691	0.851618		1.41734	0.860495	0.492412	-0.0429755	0.513865	0.881949	0.450946	0.465661		0.399833	1.51197	1.34691	0.450946	0.955903	0.898929
GAGTTCCAAAGGCACTATCTA	1300018J18Rik	TRCN0000192913	3.33799	3.39258	3.5775	3.65113		3.80216	3.75333	3.85788	-0.464169	-0.415338	-0.519888	-0.466465	0.0523128		3.7023	3.65523	3.59237	-0.309718	-0.262647	-0.19979	-0.257385	0.0551524		6.56169	3.64464	5.28878	-2.98419	-0.06714	-1.71128	-1.58754	1.46246		3.61244	5.48787	3.82429	0.0386837	-1.83674	-0.173169	-0.657075	1.0271		-0.466465	-0.257385	-1.58754	-0.657075	-0.361925	-1.12231
GCAGAAACTAGCTGAAGCATT	1300018J18Rik	TRCN0000192514	4.47085	3.85113	3.94633	4.81998		4.48358	4.29888	4.62787	-0.0127291	0.171969	-0.157023	0.000738805	0.164909		3.55506	4.12343	3.51673	0.296066	-0.272303	0.334396	0.119386	0.339754		3.91972	5.74495	4.91845	0.026604	-1.79863	-0.972123	-0.914715	0.913968		6.79912	4.77468	4.37233	-1.97914	0.0452952	0.447651	-0.495399	1.30061		0.000738805	0.119386	-0.914715	-0.495399	0.0600625	-0.705057
CTCCTCCATCCAGAATAATTA	1500001M20Rik	TRCN0000183025	3.04678	2.92082	3.19284	3.25044		4.1338	3.17036	3.35883	-1.08702	-0.123583	-0.312058	-0.507554	0.510604		4.65019	2.90967	2.95403	-1.72938	0.0111489	-0.0332082	-0.583812	0.992335		4.2864	3.62271	4.3541	-1.09356	-0.42987	-1.16125	-0.894896	0.404144		2.3836	3.75198	1.17464	0.866839	-0.501539	2.0758	0.813701	1.28949		-0.507554	-0.583812	-0.894896	0.813701	-0.545683	-0.0405975
CCTCATGCTACCTGAAAGCTT	1500001M20Rik	TRCN0000183879	3.9836	4.10581	3.68809	3.76939		4.2167	4.38864	4.97823	-0.2331	-0.405048	-0.994635	-0.544261	0.399399		4.19663	4.69565	4.85681	-0.0908207	-0.589842	-0.751003	-0.477222	0.344199		5.3869	4.20299	6.45642	-1.69881	-0.514903	-2.76832	-1.66068	1.12719		2.15426	2.45579	2.42325	1.61513	1.3136	1.34613	1.42495	0.165498		-0.544261	-0.477222	-1.66068	1.42495	-0.510742	-0.117863
CAAGGCCAACTGGAGATAGAT	1500001M20Rik	TRCN0000184728	3.46204	3.44084	2.6047	3.29692		2.72141	2.29605	2.05267	0.740629	1.166	1.40937	1.10533	0.338475		1.48475	1.33648	2.23162	1.95609	2.10436	1.20922	1.75656	0.479769		1.71779	1.62058	1.62048	0.886912	0.984114	0.984218	0.951748	0.0561498		3.41541	0.913518	1.30991	-0.118489	2.3834	1.98701	1.41731	1.34473		1.10533	1.75656	0.951748	1.41731	1.43095	1.18453
GAGAATCCCATGTTAGACTTA	1500001M20Rik	TRCN0000183339	4.12437	4.66053	4.3946	3.54815		3.99716	3.03922	3.41473	0.127203	1.08514	0.709635	0.64066	0.48268		3.49756	3.28846	4.27582	1.16297	1.37207	0.384707	0.973248	0.520304		3.48787	3.86609	3.00042	0.906739	0.528511	1.39418	0.943144	0.433982		3.44836	3.90383	3.70663	0.0997813	-0.355683	-0.158485	-0.138129	0.228414		0.64066	0.973248	0.943144	-0.138129	0.806954	0.402507
CAACATGGCGTCTAGTCAAAC	1500009L16Rik	TRCN0000347671	3.22746	3.31185	2.01141	4.35449		3.2182	3.34283	2.05267	0.00925509	-0.115377	1.17479	0.356222	0.711633		3.71917	4.60813	2.97986	-0.407318	-1.29628	0.331985	-0.457205	0.815279		0.221434	1.46498	3.15018	1.78997	0.546424	-1.13877	0.399208	1.46991		0.775847	0.346971	2.26576	3.57864	4.00752	2.08873	3.22497	1.0071		0.356222	-0.457205	0.399208	3.22497	-0.0504911	1.81209
ACGACAAGAGGAGAAACTATG	1500009L16Rik	TRCN0000347672	2.42697	1.77781	2.74563	3.18605		2.15735	3.03922	2.73178	0.269624	-0.612252	-0.304811	-0.215813	0.447624		1.02382	2.37703	4.37651	0.753999	-0.59922	-2.5987	-0.81464	1.6867		3.40895	2.89018	0.133899	-0.663319	-0.144548	2.61173	0.601288	1.76031		0	1.6668	2.86529	3.18605	1.51924	0.320755	1.67535	1.43901		-0.215813	-0.81464	0.601288	1.67535	-0.515226	1.13832
ACACAACAGAAGACTCGATAA	1500009L16Rik	TRCN0000347751	4.26969	3.59379	4.51577	3.78759		3.32586	4.27217	3.5667	0.943832	-0.00248133	0.702989	0.548113	0.4918		3.33199	4.9834	3.44806	0.261803	-1.38961	0.145737	-0.327355	0.921765		2.04221	1.98378	3.33765	2.47356	2.53199	1.17813	2.06122	0.765343		3.45919	2.33466	2.53794	0.328402	1.45293	1.24965	1.01033	0.599246		0.548113	-0.327355	2.06122	1.01033	0.110379	1.53578
GGTCCAACAGGAGCAGTTAAA	1500009L16Rik	TRCN0000347750	2.13909	2.25897	1.46135	2.25508		1.62132	0.857826	1.8049	0.517766	1.28126	0.33419	0.711072	0.502256		0.582565	1.47486	1.42238	1.6764	0.784108	0.836586	1.09903	0.500704		0.972453	1.04889	0	0.488897	0.412461	1.46135	0.787569	0.584761		0.149999	1.74202	1.28822	2.10508	0.513061	0.966855	1.195	0.820164		0.711072	1.09903	0.787569	1.195	0.905052	0.991284
CGGCAGATCACAGCATGATAA	1500010J02Rik	TRCN0000184066,TRCN0000328110	1.88418	2.28034	1.41386	1.86042		3.38281	2.70834	4.3164	-1.49863	-0.824162	-2.43222	-1.585	0.8075		2.83252	2.54355	2.7943	-0.552185	-0.263215	-0.513964	-0.443121	0.156971		1.46386	1.32716	1.33552	-0.0500016	0.0866975	0.0783418	0.0383459	0.0766252		0.410021	0.777118	1.24386	1.4504	1.0833	0.616563	1.05009	0.417909		-1.585	-0.443121	0.0383459	1.05009	-1.01406	0.544217
GGCCCTCATGAAACGTAATTT	1500010J02Rik	TRCN0000328177	4.0557	3.8724	4.05867	3.62303		3.51971	3.44202	4.06016	0.535986	0.613682	-0.00445942	0.381736	0.336704		4.1662	3.56514	4.45414	-0.293804	0.307257	-0.581738	-0.189428	0.453595		3.0984	2.09413	4.32872	0.960267	1.96454	-0.270054	0.884917	1.1192		1.00971	2.38246	1.68656	2.61331	1.24056	1.93647	1.93011	0.686397		0.381736	-0.189428	0.884917	1.93011	0.0961541	1.40752
CCGTTCTTGTACCCAAACCAA	1500010J02Rik	TRCN0000184378,TRCN0000328174	4.20521	3.70861	4.65334	4.27417		3.79918	4.24496	4.55512	0.406037	-0.039749	-0.349911	0.00545921	0.379996		4.63027	4.50893	4.14948	-0.921654	-0.800311	-0.440865	-0.720943	0.250028		4.53995	3.53934	4.72157	0.113389	1.11399	-0.0682287	0.386385	0.636638		5.85464	3.09506	2.30947	-1.58048	1.17911	1.9647	0.521109	1.86193		0.00545921	-0.720943	0.386385	0.521109	-0.357742	0.453747
GCTGTTCTTACTGTCCCACAA	1500010J02Rik	TRCN0000184377,TRCN0000328107	4.53481	4.66866	4.24659	4.91741		3.56612	2.80467	2.06347	0.968692	1.73014	2.47134	1.72339	0.751348		3.84744	3.38378	4.06751	0.821214	1.28488	0.601145	0.902414	0.349026		1.81621	1.96067	1.90903	2.43038	2.28593	2.33757	2.35129	0.0731969		6.03481	1.29948	2.67791	-1.11741	3.61793	2.2395	1.58001	2.43558		1.72339	0.902414	2.35129	1.58001	1.3129	1.96565
CCAACATTGTTTACTGTTGTT	1500010J02Rik	TRCN0000183861,TRCN0000328109	5.74494	5.31963	6.01893	5.80319		6.26726	5.79167	5.93986	-0.522322	-0.0467281	-0.19492	-0.254657	0.243359		6.251	6.31042	6.2939	-0.931369	-0.990783	-0.974261	-0.965471	0.0306666		6.67001	6.46085	6.98806	-0.651082	-0.441929	-0.969136	-0.687382	0.265471		4.88339	7.32822	4.72078	0.919801	-1.52504	1.0824	0.159056	1.46073		-0.254657	-0.965471	-0.687382	0.159056	-0.610064	-0.264163
CCACTGTGATTTCTAGTTATT	1500010J02Rik	TRCN0000182931	4.71839	4.64414	4.76637	4.63537		5.22265	5.32593	4.57035	-0.50426	-0.60754	0.148038	-0.321254	0.409686		6.20235	5.27975	5.08225	-1.55821	-0.635611	-0.438111	-0.877311	0.597888		5.22356	5.65959	7.2036	-0.457191	-0.893223	-2.43723	-1.26255	1.04041		4.60189	5.4791	6.28189	0.0334749	-0.843731	-1.64652	-0.818926	0.840273		-0.321254	-0.877311	-1.26255	-0.818926	-0.599282	-1.04074
GAGCCTGGATTTATCGAATTA	1500011B03Rik	TRCN0000095910,TRCN0000323582	3.8698	4.30666	4.5007	4.56958		4.15029	4.48483	3.88857	-0.28049	-0.615024	-0.0187679	-0.304761	0.298868		4.31509	4.19276	3.41435	-0.00842077	0.113905	0.892318	0.332601	0.488573		2.2776	3.45086	2.22134	2.2231	1.04984	2.27936	1.85077	0.694192		3.02668	5.23407	1.07686	1.5429	-0.664491	3.49272	1.45704	2.07994		-0.304761	0.332601	1.85077	1.45704	0.01392	1.6539
AGCCTGGATTTATCGAATTAT	1500011B03Rik	TRCN0000095911	3.93549	3.84397	3.80622	4.40252		4.46674	4.08537	4.04933	-0.531254	-0.149882	-0.113845	-0.264994	0.231291		4.20264	4.44511	4.48513	-0.358671	-0.601144	-0.641166	-0.533661	0.152861		2.78085	4.03055	5.79345	1.02537	-0.224328	-1.98723	-0.395397	1.51357		3.6221	3.29313	2.69449	0.780412	1.10939	1.70803	1.19928	0.470295		-0.264994	-0.533661	-0.395397	1.19928	-0.399327	0.401939
CAAAGGACTATGGGTTACAGA	1500015L24Rik	TRCN0000178630	4.22786	4.58953	4.24433	4.80933		4.06088	3.61494	3.95388	0.166982	0.612922	0.27398	0.351295	0.232806		4.49725	3.87113	3.52026	0.092284	0.718405	1.06927	0.626654	0.494914		4.07831	3.03001	2.20114	0.166025	1.21432	2.04319	1.14118	0.940718		2.09074	2.60025	2.68622	2.71859	2.20909	2.12311	2.35026	0.321867		0.351295	0.626654	1.14118	2.35026	0.488974	1.74572
CAGAGTGAAGACAAGAACTAA	1500015L24Rik	TRCN0000176465	3.31467	3.51484	3.79699	3.33701		3.44908	3.8796	3.70418	-0.134408	-0.564929	-0.389506	-0.362948	0.216485		0.996403	3.49368	3.53776	2.51844	0.02116	-0.0229181	0.838893	1.45469		2.95762	2.5771	1.98188	0.839375	1.21989	1.81512	1.29146	0.491792		1.06742	1.95933	2.13825	2.26959	1.37769	1.19876	1.61535	0.573612		-0.362948	0.838893	1.29146	1.61535	0.237973	1.4534
GAGATCTCTATGCCTGTTCTT	1500015L24Rik	TRCN0000178306	3.74626	3.89336	4.56552	3.74724		4.52934	5.12914	5.84446	-0.783081	-1.38288	-2.0982	-1.42138	0.658402		3.94746	4.75967	4.42622	-0.0541011	-0.866312	-0.532862	-0.484425	0.408266		3.74867	5.64516	3.71062	0.816851	-1.07965	0.8549	0.197368	1.10609		5.36114	4.86663	6.12714	-1.6139	-1.11938	-2.3799	-1.70439	0.635112		-1.42138	-0.484425	0.197368	-1.70439	-0.952905	-0.753512
CAACAAGAAATGGGTCTGTAA	1500015L24Rik	TRCN0000176526	4.36812	3.9611	3.80315	4.35693		4.47799	4.33374	3.74501	-0.109867	0.0343828	0.623115	0.182544	0.388303		4.5571	5.5859	4.23564	-0.596002	-1.6248	-0.274539	-0.83178	0.705332		5.69385	5.02804	4.1689	-1.8907	-1.22489	-0.365749	-1.16045	0.764515		4.28058	2.5509	4.60935	0.0763541	1.80603	-0.252421	0.543322	1.10583		0.182544	-0.83178	-1.16045	0.543322	-0.324618	-0.308561
CAATACGATTCCTGCATCCAA	1500015L24Rik	TRCN0000178656	4.3794	4.1702	3.09587	3.89556		4.31613	3.92888	4.30279	0.0632714	0.450523	0.0766116	0.196802	0.21983		4.47507	3.83945	4.72858	-0.304873	0.330752	-0.55838	-0.1775	0.458047		5.9257	3.53152	5.55165	-2.82984	-0.435653	-2.45578	-1.90709	1.28795		3.73325	4.92267	4.43287	0.162313	-1.0271	-0.537301	-0.467363	0.597783		0.196802	-0.1775	-1.90709	-0.467363	0.0096509	-1.18723
GAGGCTAAATTTGAAGATGAT	1500015O10Rik	TRCN0000177396	4.47296	4.46439	4.75847	4.56114		5.92091	5.58386	5.70484	-1.44795	-1.1109	-1.23189	-1.26358	0.170746		6.17433	5.75503	5.85562	-1.70995	-1.29065	-1.39123	-1.46394	0.218902		5.5086	5.15567	5.43433	-0.750132	-0.397204	-0.675861	-0.607732	0.186067		4.63249	4.87834	4.01786	-0.0713432	-0.317201	0.543281	0.0515788	0.443215		-1.26358	-1.46394	-0.607732	0.0515788	-1.36376	-0.278077
GATGATGTCAACTATTGGCTA	1500015O10Rik	TRCN0000177171	3.09137	2.80761	3.25705	2.77628		3.05756	3.36828	3.25901	0.0338055	-0.276905	-0.16764	-0.136913	0.157618		1.44475	3.05466	2.39415	1.36286	-0.247054	0.413451	0.509752	0.809266		1.86958	2.45006	2.97685	1.38746	0.806988	0.280191	0.82488	0.553852		0.728931	2.13704	1.66989	2.04734	0.639235	1.10639	1.26432	0.717218		-0.136913	0.509752	0.82488	1.26432	0.186419	1.0446
GATGAGGCTAAATTTGAAGAT	1500015O10Rik	TRCN0000177333	4.48763	4.43133	4.46425	4.087		4.01013	4.91134	4.30279	0.477495	-0.423707	0.184837	0.0795417	0.459735		4.92922	5.27265	5.01886	-0.497889	-0.841321	-0.587532	-0.642247	0.178134		5.05813	5.09857	3.9011	-0.593882	-0.634318	0.563157	-0.221681	0.67999		5.56271	4.1748	3.14405	-1.47571	-0.0878006	0.942946	-0.206855	1.21371		0.0795417	-0.642247	-0.221681	-0.206855	-0.281353	-0.214268
CAGCGTCATTATGATGAAGAT	1500015O10Rik	TRCN0000176691	3.87619	3.77034	4.13387	3.61897		3.76592	4.60563	3.63346	0.110274	-0.729438	0.242732	-0.125477	0.527222		4.52629	4.54276	4.93418	-0.755943	-0.772413	-1.16383	-0.897396	0.230887		5.40283	4.89411	6.50202	-1.26896	-0.760245	-2.36815	-1.46579	0.821825		4.14196	1.79949	3.42305	-0.52299	1.81948	0.195913	0.497466	1.19999		-0.125477	-0.897396	-1.46579	0.497466	-0.511437	-0.484159
CTTCTCCGAGTGTTCTCCATT	1500032L24Rik	TRCN0000126052,TRCN0000353738	2.04019	2.36281	2.58339	2.81228		2.91037	3.06539	2.9099	-0.870183	-1.0252	-0.869717	-0.9217	0.0896339		2.12689	1.7853	2.9383	0.235913	0.577508	-0.575495	0.0793084	0.592239		1.49816	2.13601	3.60311	1.08524	0.447383	-1.01972	0.170967	1.07936		0.410021	1.48607	1.15081	2.40225	1.3262	1.66147	1.79664	0.550614		-0.9217	0.0793084	0.170967	1.79664	-0.421196	0.983804
GCACTGATGATGTGGTGGCAT	1500032L24Rik	TRCN0000126049,TRCN0000353737	2.40064	2.83675	2.53242	3.80556		2.56145	3.15094	3.12107	-0.160813	-0.750309	-0.720437	-0.543853	0.332059		2.3812	3.5958	3.12586	0.455553	-0.759047	-0.289105	-0.197533	0.612456		2.37309	2.48288	1.57411	0.159333	0.0495354	0.95831	0.389059	0.496032		1.06742	3.23703	3.37758	2.73814	0.56853	0.427982	1.24488	1.2951		-0.543853	-0.197533	0.389059	1.24488	-0.370693	0.816971
CCGAGTGTTCTCCATTGTGAT	1500032L24Rik	TRCN0000126050	2.81381	3.42173	2.45633	3.40931		3.57662	3.81322	4.10528	-0.762805	-0.999408	-1.29147	-1.01789	0.264815		4.07742	3.50987	4.79266	-0.655688	-0.08814	-1.37094	-0.704921	0.642813		3.47931	2.59223	3.69626	-1.02298	-0.135899	-1.23993	-0.799603	0.58493		4.08488	4.13628	3.20896	-0.675569	-0.726971	0.200352	-0.400729	0.521186		-1.01789	-0.704921	-0.799603	-0.400729	-0.861407	-0.600166
CGGGACACTCATCAGCAAGAA	1500032L24Rik	TRCN0000126051,TRCN0000323705	0.474175	0.0995552	0.272694	0.18711		0	0.0842967	0	0.474175	0.389878	0.474175	0.446076	0.0486687		0.106402	0	0.0398466	-0.00684669	0.0995552	0.0597085	0.0508057	0.0537567		0	0	0	0.272694	0.272694	0.272694	0.272694	0		0	0	0	0.18711	0.18711	0.18711	0.18711	0		0.446076	0.0508057	0.272694	0.18711	0.248441	0.229902
CCCTTTCTCTATGTCGGGACA	1500032L24Rik	TRCN0000126053,TRCN0000323704	3.66007	3.7475	2.92572	3.65906		3.37481	3.18952	3.15176	0.285255	0.470553	0.508309	0.421372	0.119383		3.71076	3.03242	3.8578	0.0367464	0.715086	-0.110296	0.213846	0.440269		3.20606	2.66555	2.54358	-0.280339	0.26017	0.382141	0.120657	0.352587		2.56817	3.75924	7.81376	1.09088	-0.100185	-4.1547	-1.05467	2.74997		0.421372	0.213846	0.120657	-1.05467	0.317609	-0.467005
GATTCGGAAACGGGAATGGAT	1520401A03Rik	TRCN0000190040	2.34647	3.07555	2.85636	2.92836		2.92688	2.64036	2.38953	-0.580405	-0.293883	-0.0430567	-0.305782	0.268871		2.8632	3.05466	0.923069	0.212346	0.0208862	2.15248	0.795236	1.1793		1.42873	2.19663	0.907117	1.42762	0.659724	1.94924	1.34553	0.648666		0.219528	0.307896	1.28822	2.70883	2.62047	1.64014	2.32315	0.59315		-0.305782	0.795236	1.34553	2.32315	0.244727	1.83434
GTTCAGCAATGGGAATGGAAT	1520401A03Rik	TRCN0000201708	4.00997	4.26438	4.05609	3.17503		3.71929	4.15036	4.61692	0.29068	-0.140391	-0.606946	-0.152219	0.44893		3.57373	3.97098	2.23162	0.690653	0.293404	2.03277	1.00561	0.911452		2.9881	3.45086	2.89748	1.06799	0.605234	1.15861	0.943944	0.296811		1.3569	3.0002	2.10143	1.81812	0.17483	1.0736	1.02218	0.822852		-0.152219	1.00561	0.943944	1.02218	0.426695	0.983064
ATGATGTGACCTTCTTGTAAA	1520402A15Rik	TRCN0000346322	1.37235	2.93437	2.1239	2.47764		1.84627	1.50345	1.67006	-0.473924	-0.131104	-0.297712	-0.300914	0.171432		2.83252	2.88506	2.06782	0.101842	0.0493086	0.86655	0.339233	0.457424		3.86821	1.889	0.256419	-1.74431	0.234901	1.86748	0.119357	1.80866		2.01454	0.71873	0.767778	0.463101	1.75891	1.70987	1.31063	0.734388		-0.300914	0.339233	0.119357	1.31063	0.0191598	0.714992
GTGACCTTGAACGAGGGTATT	1520402A15Rik	TRCN0000346268	1.2982	1.58516	0.751575	2.47764		0	1.76843	0.356797	1.2982	-0.470234	0.9414	0.589787	0.935179		0	1.24272	1.3128	1.58516	0.342434	0.272353	0.733315	0.738549		0.221434	0.526219	0	0.530141	0.225356	0.751575	0.502357	0.264207		0	1.19627	0	2.47764	1.28137	2.47764	2.07889	0.690667		0.589787	0.733315	0.502357	2.07889	0.661551	1.29062
CGGCTGGACAGTGTCTCTATT	1520402A15Rik	TRCN0000353234	0	0	0	0.0491013		0	0	0	0	0	0	0	0		0	0	0	0	0	0	0	0		0	0	0	0	0	0	0	0		0	0	0	0.0491013	0.0491013	0.0491013	0.0491013	0		0	0	0	0.0491013	0	0.0245506
CCAGGGCTTTGAAGCTCATTG	1520402A15Rik	TRCN0000346325	0.17595	0.0995552	0.0422563	0.230327		0.0809064	0.0427639	0	0.0950432	0.133186	0.17595	0.134726	0.0404752		0.298212	0.17263	0.189063	-0.198657	-0.0730751	-0.0895074	-0.120413	0.0682576		0.136894	0.170896	0.216724	-0.0946375	-0.128639	-0.174467	-0.132581	0.0400606		0	0.140069	0	0.230327	0.0902584	0.230327	0.183638	0.0808688		0.134726	-0.120413	-0.132581	0.183638	0.00715649	0.0255282
TGCATTTATCCCTCAATTATT	1520402A15Rik	TRCN0000346323	3.28138	3.24819	1.78127	0.635915		1.20029	3.49687	0.522515	2.08109	-0.215493	2.75886	1.54149	1.55887		3.61036	2.41191	0.741669	-0.362169	0.836277	2.50652	0.993543	1.4408		0.221434	3.28394	1.84538	1.55984	-1.50267	-0.0641041	-0.00231203	1.53219		0	1.06181	0.67057	0.635915	-0.425895	-0.0346543	0.0584555	0.536994		1.54149	0.993543	-0.00231203	0.0584555	1.26752	0.0280717
CTGAGCACAGACTACGATCAA	1600002H07Rik	TRCN0000173435	3.40135	3.4503	3.12565	3.72475		2.2301	1.90218	2.64096	1.17125	1.49917	0.760387	1.1436	0.370168		2.58817	1.97217	2.41703	0.862126	1.47813	1.03327	1.12451	0.317978		1.3179	1.52925	2.56744	1.80775	1.5964	0.558206	1.32078	0.668814		0.821285	0.385015	0.529847	2.90347	3.33974	3.19491	3.14604	0.222203		1.1436	1.12451	1.32078	3.14604	1.13406	2.23341
GATTACCCTGAGCACAGACTA	1600002H07Rik	TRCN0000173468	4.23781	3.6023	3.90399	4.36665		2.20325	1.40855	1.84301	2.03456	2.82927	2.39481	2.41955	0.397927		0.618971	1.31821	0.224074	2.98333	2.2841	3.37823	2.88189	0.554076		0.261916	1.29055	0	3.64207	2.61344	3.90399	3.3865	0.682177		1.17635	1.7124	0.289112	3.1903	2.65425	4.07754	3.30736	0.718829		2.41955	2.88189	3.3865	3.30736	2.65072	3.34693
CCACAGAACTCTTCGCATTAA	1600002H07Rik	TRCN0000176436	4.63612	4.6646	4.26455	3.93855		3.91404	4.13562	3.9216	0.722078	0.500495	0.714521	0.645698	0.125806		4.06097	4.21515	4.55727	0.603629	0.449453	0.107335	0.386806	0.254009		3.07018	3.3477	3.69986	1.19437	0.916849	0.564694	0.891971	0.315575		2.87334	3.20548	2.25462	1.06521	0.733062	1.68392	1.16073	0.482574		0.645698	0.386806	0.891971	1.16073	0.516252	1.02635
GAAACCAAAGAAGAGGACCCA	1600002H07Rik	TRCN0000173375	3.84723	3.99382	4.26008	2.91518		4.06337	3.7404	3.57804	-0.21614	0.10683	0.269184	0.053291	0.247052		4.27857	4.38933	4.15629	-0.28475	-0.395507	-0.162475	-0.280911	0.116564		4.00269	4.15288	2.87215	0.257397	0.107204	1.38793	0.584178	0.70011		4.42002	5.06568	1.79815	-1.50484	-2.1505	1.11703	-0.846104	1.7305		0.053291	-0.280911	0.584178	-0.846104	-0.11381	-0.130963
GACTACGATCAAAGGGTGATA	1600002H07Rik	TRCN0000175921	5.06992	5.14421	5.13064	5.01486		5.35053	5.2674	5.21097	-0.280606	-0.197484	-0.141048	-0.206379	0.0702032		5.43463	5.34887	5.95666	-0.290416	-0.20466	-0.812444	-0.43584	0.328955		4.98293	5.11175	5.62551	0.147704	0.0188899	-0.49487	-0.109425	0.339962		6.34737	6.01015	5.98107	-1.33251	-0.995287	-0.966209	-1.098	0.203609		-0.206379	-0.43584	-0.109425	-1.098	-0.32111	-0.603713
GCCCACCTTATAACCACACAA	1600002K03Rik	TRCN0000182697	4.17704	3.93439	4.41485	4.02392		2.89926	3.53107	3.17186	1.27778	0.645975	1.00518	0.976312	0.316892		3.36987	3.9739	2.71037	0.564518	-0.0395159	1.22401	0.583005	0.631968		3.55457	2.21629	1.99367	0.860285	2.19856	2.42118	1.82668	0.844289		4.48852	2.88545	1.94394	-0.464595	1.13847	2.07998	0.917952	1.28654		0.976312	0.583005	1.82668	0.917952	0.779659	1.37231
GACTGTCTTTGAAACCAGGAA	1600002K03Rik	TRCN0000181598	3.87619	4.0509	4.67196	3.90226		3.70978	3.61848	4.18162	0.166408	0.257714	-0.305431	0.0395637	0.302242		4.56878	3.75028	3.56191	-0.517883	0.300624	0.488994	0.0905782	0.535294		4.84983	4.0471	3.03507	-0.177873	0.624857	1.63689	0.694624	0.90939		4.2601	1.06181	6.03658	-0.357837	2.84045	-2.13432	0.116099	2.52102		0.0395637	0.0905782	0.694624	0.116099	0.065071	0.405362
GTTCTACGTAATCACTGGGCT	1600002K03Rik	TRCN0000200465	3.40577	3.34266	3.3857	2.44132		3.28802	3.11633	3.54375	0.11775	0.289444	-0.137974	0.0897399	0.215081		4.40644	4.36283	2.40944	-1.06378	-1.02018	0.933211	-0.383583	1.14059		3.4707	4.663	3.7939	-0.0850012	-1.27731	-0.408206	-0.590171	0.616629		3.06497	2.35397	0.67057	-0.623644	0.0873498	1.77075	0.411485	1.22967		0.0897399	-0.383583	-0.590171	0.411485	-0.146921	-0.0893429
CGAGGAAGAGACTGTCTTTGA	1600002K03Rik	TRCN0000200246	2.06276	2.73205	2.17227	1.41239		0	0.379459	0	2.06276	1.6833	2.06276	1.93627	0.219081		0	0.0888957	0	2.73205	2.64316	2.73205	2.70242	0.0513239		0.339625	0.249307	0	1.83264	1.92296	2.17227	1.97596	0.175905		0	0	0.102944	1.41239	1.41239	1.30944	1.37807	0.0594347		1.93627	2.70242	1.97596	1.37807	2.31935	1.67702
CCAGTATTTAGCTGTGCTGAA	1600012F09Rik	TRCN0000192098	4.08632	4.43133	4.3782	4.0603		4.02554	4.69882	4.61508	0.0607706	-0.612507	-0.528766	-0.360168	0.36694		5.25399	4.85938	5.57288	-0.822666	-0.428049	-1.14155	-0.797421	0.357418		3.57077	1.64979	4.06095	0.807433	2.72842	0.317251	1.28437	1.27437		2.47173	3.86398	3.44281	1.58857	0.196327	0.61749	0.800796	0.713994		-0.360168	-0.797421	1.28437	0.800796	-0.578794	1.04258
CGCACAGAACATTAAGAGATT	1600012F09Rik	TRCN0000191412	3.73927	3.92763	4.24885	4.80398		4.58761	3.64994	5.39645	-0.848339	0.089336	-1.65718	-0.805394	0.874048		4.56878	4.71847	3.97805	-0.641156	-0.790842	-0.0504204	-0.494139	0.391492		4.08678	4.31205	3.9011	0.162067	-0.0632028	0.347755	0.148873	0.205796		2.44295	4.81531	3.74693	2.36103	-0.0113284	1.05705	1.13558	1.18813		-0.805394	-0.494139	0.148873	1.13558	-0.649766	0.642228
CCACCTGAAGTTAATATACAA	1600012F09Rik	TRCN0000191372	3.74277	3.66865	4.12407	4.45128		5.73264	5.1586	5.28897	-1.98987	-1.41583	-1.54619	-1.65063	0.300933		6.06148	5.58304	6.01904	-2.39283	-1.91439	-2.35039	-2.2192	0.264829		5.22867	5.75506	6.35436	-1.10461	-1.631	-2.23029	-1.6553	0.563236		4.11027	4.47075	4.42544	0.341004	-0.0194701	0.0258397	0.115791	0.196351		-1.65063	-2.2192	-1.6553	0.115791	-1.93492	-0.769755
GCAGACGTCATTATAAACTAT	1600012F09Rik	TRCN0000191484	4.38613	4.09379	4.80982	4.72308		4.49285	4.89684	4.38689	-0.106717	-0.510708	-0.00075822	-0.206061	0.269099		4.28141	4.87976	4.62433	-0.187624	-0.785977	-0.530538	-0.50138	0.300241		4.35584	5.45146	3.65972	0.453981	-0.641632	1.15011	0.320819	0.903262		4.60677	5.05392	2.87259	0.116314	-0.330841	1.85049	0.545319	1.15221		-0.206061	-0.50138	0.320819	0.545319	-0.35372	0.433069
GCAGACATCCAGTTTAGTGAA	1600012F09Rik	TRCN0000192583	3.68211	4.45031	4.20069	3.41401		3.99194	4.72203	3.80093	-0.309837	-1.03993	-0.118829	-0.489531	0.486131		4.44497	4.01134	3.63852	0.00534037	0.438971	0.811791	0.418701	0.403607		3.80112	4.31661	0.175905	0.399575	-0.115922	4.02479	1.43615	2.2566		3.56982	3.37575	3.92608	-0.15581	0.0382557	-0.512073	-0.209876	0.27912		-0.489531	0.418701	1.43615	-0.209876	-0.035415	0.613135
ACTTCCTGAAGTGCCACTTTC	1600014K23Rik	TRCN0000346287	0.95634	0.58506	1.79369	2.28613		1.08733	0.732815	1.65586	-0.130991	0.223525	-0.699519	-0.202328	0.465639		1.29529	1.79854	1.00588	-0.710228	-1.21348	-0.420817	-0.781507	0.401109		0.845014	1.46498	0	0.948679	0.328711	1.79369	1.02369	0.735366		0.704888	3.48488	0.916516	1.58124	-1.19875	1.36961	0.584036	1.54756		-0.202328	-0.781507	1.02369	0.584036	-0.491918	0.803865
TTGCAGCTGTATGGCAGTTAC	1600014K23Rik	TRCN0000346226	1.69486	2.71645	2.69355	2.11221		1.67443	3.42998	2.03082	0.0204332	-1.73512	-0.335959	-0.683549	0.927959		2.06226	1.63103	1.96808	0.654192	1.08543	0.748375	0.829331	0.226729		3.17989	1.67841	1.02672	-0.486335	1.01514	1.66683	0.73188	1.10418		1.63654	0.0482165	2.23209	0.475673	2.064	-0.119875	0.806598	1.12892		-0.683549	0.829331	0.73188	0.806598	0.0728907	0.769239
AGAGCCTTCTGCAGCTGTATG	1600014K23Rik	TRCN0000346288	2.70323	3.58523	2.92572	2.08892		1.12597	1.37547	3.3892	1.57726	1.32776	-0.685972	0.739681	1.24094		1.96662	1.14245	1.00588	1.61861	2.44278	2.57935	2.21358	0.519766		1.90835	1.09208	0	1.01736	1.83364	2.92572	1.92557	0.957494		0	0	0.0523899	2.08892	2.08892	2.03653	2.07146	0.0302473		0.739681	2.21358	1.92557	2.07146	1.47663	1.99852
ATGGCCTCGTTCTGCAATAAA	1600014K23Rik	TRCN0000346286	0.571826	0	0.272694	0.0491013		0	0.202169	0	0.571826	0.369657	0.571826	0.504437	0.116723		0.0541816	0	0.0786222	-0.0541816	0	-0.0786222	-0.044268	0.0402377		0	0.0879768	0	0.272694	0.184717	0.272694	0.243368	0.0507934		0.185182	0.0482165	0	-0.136081	0.000884761	0.0491013	-0.0286983	0.0960702		0.504437	-0.044268	0.243368	-0.0286983	0.230084	0.107335
ACTTACCTGTCGGAGTCTAAC	1600014K23Rik	TRCN0000346289	2.59124	1.86528	1.53718	1.07577		1.12597	0.595935	0.128988	1.46527	1.99531	2.46225	1.97428	0.498825		1.84894	0.466063	0.812393	0.0163409	1.39922	1.05289	0.822817	0.719575		1.37438	0.394397	2.30889	0.162804	1.14279	-0.771711	0.17796	0.957339		1.08616	0	0	-0.0103863	1.07577	1.07577	0.713718	0.627093		1.97428	0.822817	0.17796	0.713718	1.39855	0.445839
CCTAGATGAGTTAAACGTCTA	1600021P15Rik	TRCN0000182919	4.98531	4.30145	4.85052	4.4918		5.1127	5.13285	4.9768	-0.127386	-0.147541	0.00850849	-0.088806	0.0848772		6.15664	6.40434	6.36718	-1.8552	-2.10289	-2.06574	-2.00794	0.133579		4.97535	4.59707	4.9551	-0.124822	0.253458	-0.104573	0.0080211	0.212795		4.28058	4.64351	4.07279	0.211222	-0.151714	0.419006	0.159505	0.288853		-0.088806	-2.00794	0.0080211	0.159505	-1.04837	0.0837628
CCCTAATTATTTCATCCCTCA	1600021P15Rik	TRCN0000183764	4.44531	3.67673	4.09425	4.55265		5.04877	4.42345	4.04389	-0.603462	0.0218597	0.401419	-0.0600609	0.507425		3.94388	4.78981	4.85262	-0.267145	-1.11308	-1.17589	-0.852041	0.507507		3.94791	4.1681	4.93536	0.14634	-0.073848	-0.841111	-0.256207	0.518368		3.96094	5.12027	1.41368	0.591717	-0.567614	3.13897	1.05436	1.89611		-0.0600609	-0.852041	-0.256207	1.05436	-0.456051	0.399076
GTCAACAAGATGTGCCCTAAT	1600021P15Rik	TRCN0000179248	3.56445	3.42173	3.54847	4.02392		3.58358	2.74765	3.42314	-0.0191266	0.816801	0.14131	0.312995	0.443622		3.76049	2.98109	3.18481	-0.338764	0.440643	0.236923	0.112934	0.404226		4.87615	3.41729	3.3237	-1.32768	0.131187	0.224773	-0.323906	0.870551		4.01082	1.13061	2.54709	0.0131022	2.89332	1.47683	1.46108	1.44017		0.312995	0.112934	-0.323906	1.46108	0.212965	0.568588
GAAGACTATGCAGCCCACTTT	1600021P15Rik	TRCN0000184582	3.81102	4.18727	3.98475	3.15274		4.64694	4.18657	4.7212	-0.835921	-0.375545	-0.910178	-0.707215	0.289624		4.60099	4.09956	4.18545	-0.413717	0.0877135	0.00182178	-0.108061	0.268167		5.39602	3.47553	5.51836	-1.41127	0.50922	-1.53361	-0.811887	1.14575		3.10685	2.70922	2.52872	0.0458846	0.443511	0.624017	0.371138	0.295783		-0.707215	-0.108061	-0.811887	0.371138	-0.407638	-0.220375
CCAACGAGTATCTGTTGCTCT	1600021P15Rik	TRCN0000184406	2.40064	3.12364	2.92006	3.54815		1.43383	2.6473	3.25901	0.966806	-0.246666	-0.858375	-0.0460784	0.928976		2.13948	1.85031	3.20685	0.984163	1.27333	-0.0832103	0.72476	0.714504		4.46823	3.17767	4.44709	-1.54817	-0.257609	-1.52702	-1.11093	0.739077		3.92497	1.63558	1.76714	-0.376819	1.91257	1.78101	1.10558	1.28548		-0.0460784	0.72476	-1.11093	1.10558	0.339341	-0.00267549
CATTAGTAAACTCCTCTTCTA	1600029D21Rik	TRCN0000200602	3.61496	3.52383	4.20069	3.58607		4.20546	3.70423	3.62619	-0.590501	-0.0892621	-0.0112282	-0.23033	0.314348		3.99325	3.34821	3.78053	-0.469419	0.175624	-0.256698	-0.183498	0.328692		3.27691	2.89018	0.907117	0.923785	1.31051	3.29357	1.84262	1.27135		0.28586	2.39183	1.19808	3.30021	1.19424	2.38799	2.29415	1.05612		-0.23033	-0.183498	1.84262	2.29415	-0.206914	2.06839
GCACAAATTCCGCTTCTTGTA	1600029D21Rik	TRCN0000201837	2.73168	2.94779	2.90297	3.663		4.7495	3.53107	2.44013	-2.01782	-0.799385	0.291547	-0.841886	1.15527		4.64137	2.6999	2.56091	-1.69359	0.247886	0.386878	-0.352941	1.16311		2.65731	4.45126	1.958	0.245658	-1.54829	0.944966	-0.119223	1.28605		1.81561	5.56239	2.25462	1.8474	-1.89939	1.40838	0.452131	2.04827		-0.841886	-0.352941	-0.119223	0.452131	-0.597413	0.166454
CAGCCAATACCACAGCCAATA	1600029D21Rik	TRCN0000202043	2.78016	2.63583	2.351	3.16393		1.46431	2.53945	0.856438	1.31585	0.240711	1.92372	1.16009	0.852247		1.66966	1.42451	0.561768	0.966177	1.21133	2.07407	1.41719	0.581927		1.90835	1.76102	0	0.442645	0.589976	2.351	1.12787	1.06182		0.149999	1.08511	0.798778	3.01393	2.07882	2.36515	2.48596	0.479119		1.16009	1.41719	1.12787	2.48596	1.28864	1.80692
CGTGGTCCTTGATAACATCTA	1600029D21Rik	TRCN0000201593	0.17595	0.0995552	0.236754	0.0491013		0.0809064	0	0.169543	0.0950432	0.17595	0.00640691	0.0924666	0.0848007		0.106402	0.0451324	0.0786222	-0.00684669	0.0544227	0.0209329	0.0228363	0.030679		0	0.170896	0	0.236754	0.065858	0.236754	0.179788	0.0986666		0.0389869	0.0948736	0	0.0101144	-0.0457723	0.0491013	0.00448113	0.047687		0.0924666	0.0228363	0.179788	0.00448113	0.0576515	0.0921348
GCCTCAAAGTCATCCGTGAAA	1600029D21Rik	TRCN0000189723	3.57234	3.55923	3.40201	3.59022		3.34646	3.17036	3.15681	0.225879	0.401979	0.415525	0.347794	0.105799		3.49756	3.08739	2.82883	0.0616706	0.471843	0.730403	0.421306	0.337218		2.99412	2.17671	4.23745	0.407894	1.22531	-0.835433	0.265923	1.03768		3.87467	4.5057	5.1972	-0.284441	-0.915476	-1.60697	-0.93563	0.661496		0.347794	0.421306	0.265923	-0.93563	0.38455	-0.334853
CCTGAGTTCAAATCCCAGCAA	1600029O15Rik	TRCN0000120127,TRCN0000339691	3.36549	3.09979	2.68691	2.28613		2.33278	1.23502	2.37226	1.0327	2.13047	0.993227	1.38547	0.645493		2.76102	3.00413	2.04841	0.338771	0.0956681	1.05138	0.495273	0.496705		2.61886	1.73401	2.45252	0.0680451	0.952899	0.234384	0.418443	0.470266		2.00473	3.27804	2.51944	0.281403	-0.991912	-0.233313	-0.314607	0.640538		1.38547	0.495273	0.418443	-0.314607	0.94037	0.0519177
GCTCTTCTTATGGCAACACCA	1700001C02Rik	TRCN0000189935	4.38165	3.37282	3.47325	4.22159		3.56963	3.92888	2.55173	0.812022	0.452769	1.82992	1.03157	0.714343		4.65896	4.68321	3.06922	-1.28615	-1.3104	0.303598	-0.764314	0.924919		2.99412	3.31161	3.9011	0.479124	0.161632	-0.42785	0.0709689	0.460234		1.51736	0.777118	2.47215	2.70423	3.44447	1.74944	2.63272	0.849777		1.03157	-0.764314	0.0709689	2.63272	0.133628	1.35184
CAGCAGCGGAAGTATTACCAA	1700001C02Rik	TRCN0000202151	3.74626	4.31186	3.92672	4.03919		3.55554	3.63254	3.73828	0.19072	0.113718	0.00798045	0.10414	0.0917455		4.84335	4.3695	4.34505	-0.53149	-0.057638	-0.0331868	-0.207438	0.280903		2.84221	2.54638	3.56805	1.08451	1.38035	0.358674	0.941176	0.525701		3.77137	2.75352	2.05082	0.267819	1.28567	1.98837	1.18062	0.865074		0.10414	-0.207438	0.941176	1.18062	-0.0516494	1.0609
CGAATTTAATGCCGCCTTCGT	1700001C02Rik	TRCN0000202127	2.11769	2.90714	2.91439	3.05996		1.98937	3.07572	2.90391	0.128315	-0.958032	-0.786219	-0.538646	0.583958		2.43324	0.893753	1.3128	0.473905	2.01339	1.59434	1.36055	0.795927		0.762771	1.76102	1.35393	2.15161	1.15336	1.56045	1.62181	0.501947		3.36644	0.183891	2.02483	-0.306478	2.87607	1.03512	1.20157	1.59779		-0.538646	1.36055	1.62181	1.20157	0.41095	1.41169
GAGAAGAGTAAGTGGAACCTA	1700001C02Rik	TRCN0000192889	4.58635	3.78537	3.7939	4.23757		6.1397	5.80026	4.96245	-1.55335	-1.21391	-0.376098	-1.04778	0.605951		6.58648	6.46735	7.10645	-2.8011	-2.68198	-3.32108	-2.93472	0.339857		4.22885	4.8726	4.11593	-0.43495	-1.0787	-0.32203	-0.611892	0.408188		5.80179	5.94479	5.41417	-1.56422	-1.70722	-1.1766	-1.48268	0.274545		-1.04778	-2.93472	-0.611892	-1.48268	-1.99125	-1.04729
CGTGTTCCTTACTTTGTACTT	1700001C02Rik	TRCN0000191377	0.633439	0.28016	1.00761	0.788289		0.657021	0.652255	0.642617	-0.0235825	-0.0188159	-0.00917856	-0.0171923	0.00733794		0.618971	1.14245	0.324282	-0.338812	-0.862293	-0.0441221	-0.415076	0.414383		1.15549	0.811095	0.474067	-0.147877	0.196519	0.533547	0.194063	0.340719		0.630258	0	0.289112	0.15803	0.788289	0.499176	0.481832	0.315487		-0.0171923	-0.415076	0.194063	0.481832	-0.216134	0.337947
GTTTCTACAACTCACAGTATT	1700001C19Rik	TRCN0000191944	4.62478	4.46439	4.46036	4.4467		4.01271	3.99842	3.50069	0.61207	0.62636	1.1241	0.787509	0.291582		4.44243	4.0085	3.42567	0.0219528	0.455892	1.03872	0.50552	0.510195		3.00012	2.21629	1.40781	1.46025	2.24408	3.05256	2.25229	0.796187		1.2109	2.5509	1.82851	3.2358	1.89581	2.61819	2.58327	0.67068		0.787509	0.50552	2.25229	2.58327	0.646515	2.41778
GAGAATGCTTTCCAGGATTCA	1700001C19Rik	TRCN0000192831	1.83258	2.21524	2.77098	2.86807		1.64812	1.0794	0	0.184459	0.753176	1.83258	0.923404	0.837142		0.298212	1.49126	0	1.91703	0.723985	2.21524	1.61875	0.789107		0.550406	0.170896	0.0460276	2.22057	2.60008	2.72495	2.5152	0.262684		0	1.43258	0	2.86807	1.43549	2.86807	2.39054	0.827102		0.923404	1.61875	2.5152	2.39054	1.27108	2.45287
GCTTTGATGTTCCTCCAGCAA	1700001C19Rik	TRCN0000190056	4.07803	3.86534	3.81843	3.01123		2.05092	2.17632	0.391498	2.02711	1.90171	3.68653	2.53845	0.996241		1.07713	1.44149	0.667297	2.78822	2.42386	3.19805	2.80337	0.387317		0	0.249307	0	3.81843	3.56912	3.81843	3.73532	0.143937		0	0	0.636655	3.01123	3.01123	2.37458	2.79901	0.367573		2.53845	2.80337	3.73532	2.79901	2.67091	3.26717
CCTGGAGAATTGAAAGGGTTT	1700001C19Rik	TRCN0000192372	1.02691	1.05078	0.725878	0.845		1.5234	1.21646	0.998279	-0.496485	-0.189544	0.0286359	-0.219131	0.263808		1.54275	0.868864	0.447906	-0.491975	0.181913	0.602871	0.0976029	0.552271		0.705217	0.811095	0.907117	0.0206609	-0.0852174	-0.181239	-0.0819318	0.10099		0.410021	0.527888	0.492412	0.434979	0.317112	0.352588	0.368226	0.0604694		-0.219131	0.0976029	-0.0819318	0.368226	-0.060764	0.143147
GCCTGGAGAATTGAAAGGGTT	1700001C19Rik	TRCN0000190088	2.94718	2.80761	2.49487	3.36637		2.9432	2.65421	3.62254	0.00397579	0.292963	-0.675368	-0.126143	0.497106		3.34291	3.17121	2.56091	-0.535308	-0.363605	0.246697	-0.217406	0.410991		3.31107	3.04107	3.46169	-0.816191	-0.546199	-0.966818	-0.776403	0.213113		3.46277	3.88736	1.70304	-0.0964044	-0.520988	1.66333	0.348646	1.15817		-0.126143	-0.217406	-0.776403	0.348646	-0.171774	-0.213879
GCATTGGAAGAATGCAACATA	1700001F09Rik	TRCN0000178361	4.95547	4.7204	4.74574	4.65731		5.43951	4.22189	4.54745	-0.484039	0.733582	0.408019	0.219187	0.630391		5.74679	5.3612	5.08582	-1.02639	-0.640792	-0.365418	-0.677532	0.332012		3.24697	3.57022	4.98789	1.49877	1.17552	-0.242153	0.810713	0.926022		1.96479	4.36288	3.39289	2.69251	0.294423	1.26441	1.41712	1.20632		0.219187	-0.677532	0.810713	1.41712	-0.229173	1.11391
CAGAAGATCAAAGACGAATAT	1700001F09Rik	TRCN0000177557	5.65403	5.45267	5.69147	5.10324		4.70393	4.54928	4.95086	0.950099	1.10475	0.703166	0.919339	0.202553		4.40644	4.37172	4.42246	1.04624	1.08096	1.03022	1.05247	0.0259369		3.35383	3.65187	3.60311	2.33764	2.0396	2.08836	2.1552	0.159868		3.44111	3.80906	3.15607	1.66213	1.29418	1.94717	1.63449	0.327372		0.919339	1.05247	2.1552	1.63449	0.985905	1.89485
GCCAGCATTTGACTAAAGAAA	1700001F09Rik	TRCN0000178165	5.07964	5.41934	5.50576	5.68874		5.01185	5.8879	5.16407	0.067791	-0.808259	-0.084433	-0.274967	0.468074		5.12229	4.92272	4.96684	0.297057	0.496623	0.452502	0.415394	0.10483		3.9937	4.58578	5.01128	1.51206	0.919985	0.494479	0.975508	0.511058		4.67487	3.75562	7.50122	1.01387	1.93313	-1.81248	0.378172	1.95205		-0.274967	0.415394	0.975508	0.378172	0.0702133	0.67684
CCAGAAGATCAAAGACGAATA	1700001F09Rik	TRCN0000177829	5.56295	5.36536	5.25712	4.95332		4.84814	4.96791	4.74655	0.71481	0.595046	0.816399	0.708752	0.1108		4.07414	4.30602	3.88267	1.29121	1.05933	1.48269	1.27775	0.212		4.44864	3.39158	3.07447	0.808483	1.86554	2.18265	1.61889	0.719522		2.40615	3.15684	5.29421	2.54717	1.79648	-0.340889	1.33425	1.49849		0.708752	1.27775	1.61889	1.33425	0.99325	1.47657
GCCAAGTACAAGGATTTGAAT	1700001F09Rik	TRCN0000178530	3.9895	4.09981	4.28449	3.94505		3.15421	2.9909	2.14708	0.835292	0.998595	1.84242	1.22544	0.540527		3.40156	2.39458	3.34049	0.69825	1.70523	0.759323	1.05427	0.564578		4.06978	2.80188	1.5262	0.214712	1.48262	2.75829	1.48521	1.27179		2.05314	4.34127	3.10738	1.8919	-0.396228	0.837667	0.777781	1.14524		1.22544	1.05427	1.48521	0.777781	1.13985	1.13149
CCACCTCCTGATTGAATCTAA	1700001F09Rik	TRCN0000192057	3.88572	4.0509	3.55943	3.87188		4.75875	4.42749	4.46228	-0.873036	-0.541772	-0.576562	-0.66379	0.182045		5.09831	5.45092	6.00778	-1.04741	-1.40002	-1.95688	-1.4681	0.458544		5.39033	5.72965	4.90758	-1.8309	-2.17022	-1.34816	-1.78309	0.413113		6.20945	4.09957	4.57842	-2.33757	-0.227694	-0.706543	-1.0906	1.10613		-0.66379	-1.4681	-1.78309	-1.0906	-1.06595	-1.43685
CCTTCTCTGCACTTGGTGAAT	1700001F09Rik	TRCN0000182841	3.16102	3.12364	3.05	2.4596		3.15421	2.74117	3.42733	0.00680952	0.419844	-0.266311	0.0534475	0.345447		2.9657	3.62953	4.47245	0.157939	-0.505888	-1.34881	-0.565586	0.755146		5.07527	4.53972	2.86575	-2.02527	-1.48971	0.184254	-1.11024	1.1526		5.07142	2.44683	2.2434	-2.61182	0.01277	0.216197	-0.794286	1.57732		0.0534475	-0.565586	-1.11024	-0.794286	-0.256069	-0.952264
GAACCTGCAGGACTTAGCAAA	1700001G17Rik	TRCN0000190542	3.37454	3.22633	3.0858	3.96757		2.81307	1.621	2.64096	0.561463	1.75353	0.733573	1.01619	0.64433		0.618971	2.39458	1.065	2.60736	0.83175	2.16132	1.86681	0.923715		0.645271	0.811095	2.52744	2.44053	2.2747	0.558356	1.75786	1.04211		2.41358	0	0.199029	1.55399	3.96757	3.76854	3.0967	1.33973		1.01619	1.86681	1.75786	3.0967	1.4415	2.42728
CAGTGCAAACGGCAAACATTC	1700001G17Rik	TRCN0000201431	2.67421	3.48753	3.37334	2.74681		1.82294	2.25117	1.77892	0.851262	0.42304	0.895287	0.723197	0.260873		1.90898	1.86297	2.72266	1.57855	1.62456	0.764868	1.32266	0.483609		1.67345	2.74888	0	1.69988	0.624456	3.37334	1.89922	1.38524		1.17635	3.39452	1.19808	1.57047	-0.647707	1.54873	0.823831	1.27444		0.723197	1.32266	1.89922	0.823831	1.02293	1.36153
CTTCATCTTCCGGACGAGAAA	1700001G17Rik	TRCN0000190915	3.67113	3.26972	3.62345	4.25337		2.6569	3.27271	2.92775	1.01423	0.398421	0.743384	0.718677	0.308646		2.75285	2.82809	2.22299	0.516868	0.441629	1.04673	0.66841	0.329791		2.81526	4.63041	2.53553	0.808192	-1.00696	1.08792	0.296386	1.13736		3.89871	2.4647	2.84316	0.354655	1.78866	1.41021	1.18451	0.74317		0.718677	0.66841	0.296386	1.18451	0.693544	0.740448
GCAGTGCAAACGGCAAACATT	1700001G17Rik	TRCN0000201830	4.17445	4.08166	4.27123	4.18086		2.55438	2.93525	2.78496	1.62007	1.23921	1.38949	1.41626	0.191837		3.77266	2.84733	0.534134	0.309001	1.23433	3.54753	1.69695	1.66809		2.88819	4.5782	1.76509	1.38304	-0.306972	2.50614	1.19407	1.41604		4.7793	3.313	1.61869	-0.598436	0.867866	2.56218	0.943869	1.58168		1.41626	1.69695	1.19407	0.943869	1.55661	1.06897
CTTTGAGACAAACAGGTTGAT	1700001J03Rik	TRCN0000183715	2.57563	2.93437	2.80205	2.57306		2.29936	1.90218	2.66244	0.276271	0.673455	-0.0868029	0.287641	0.380256		1.6522	2.36818	1.37643	1.28217	0.566184	1.55793	1.13543	0.511899		0.261916	1.17477	1.27882	2.54014	1.62728	1.52323	1.89689	0.559497		0.843478	0.422081	0.199029	1.72958	2.15098	2.37403	2.08486	0.327272		0.287641	1.13543	1.89689	2.08486	0.711535	1.99087
GCTTTCTGTTCCACTGGTTTA	1700001J03Rik	TRCN0000180662	3.93243	3.24819	3.55578	3.40931		5.41436	3.50071	5.28897	-1.48194	0.431714	-1.35654	-0.802254	1.07049		3.68523	4.25411	3.96517	-0.437044	-1.00592	-0.716983	-0.719983	0.284451		2.40958	4.69488	3.73541	1.1462	-1.13909	-0.179625	-0.0575038	1.14753		2.50692	2.91175	2.66955	0.902393	0.497564	0.739765	0.713241	0.203713		-0.802254	-0.719983	-0.0575038	0.713241	-0.761118	0.327868
GCAAACCAAGAGTGACGTATT	1700001J03Rik	TRCN0000180574	4.55684	3.58523	4.71668	4.46265		4.07576	4.03595	4.48856	0.481083	0.520891	0.0682795	0.356751	0.250615		2.65982	4.0942	5.09885	0.925414	-0.508972	-1.51362	-0.365725	1.22581		2.60319	4.06889	3.72484	2.11349	0.647791	0.991843	1.25104	0.766455		4.11712	3.10079	3.53775	0.345527	1.36186	0.924898	0.877429	0.509828		0.356751	-0.365725	1.25104	0.877429	-0.00448721	1.06423
GCTGTTCAGCATAATGACCAT	1700001J03Rik	TRCN0000180364	3.38353	3.99382	3.64761	4.81644		4.15964	3.36407	3.66216	-0.776106	0.0194643	-0.278633	-0.345092	0.401927		5.61218	4.69919	4.72247	-1.61836	-0.705367	-0.728653	-1.01746	0.520523		3.59474	3.14728	4.17409	0.0528681	0.500329	-0.526482	0.00890496	0.514815		4.09648	4.30701	3.8688	0.719961	0.509433	0.947641	0.725678	0.21916		-0.345092	-1.01746	0.00890496	0.725678	-0.681275	0.367292
GCCCAGAATACGTGGTACAAA	1700001J03Rik	TRCN0000184289	2.95323	3.77788	3.07057	1.73099		2.85968	3.10123	2.96278	0.0935504	-0.148004	-0.00955269	-0.0213354	0.121207		3.0347	3.49774	1.52422	0.743178	0.280134	2.25366	1.09232	1.03205		3.60264	2.00654	1.75126	-0.532073	1.06403	1.3193	0.617086	1.00335		3.40425	0.226422	2.23209	-1.67326	1.50457	-0.501098	-0.223265	1.60703		-0.0213354	1.09232	0.617086	-0.223265	0.535495	0.19691
GCACAGTTGTTACAGCCTCAA	1700001J11Rik	TRCN0000091348	2.55985	1.97422	3.51135	3.53958		0.119719	1.05871	0.975586	2.44013	1.50114	1.58426	1.84184	0.519796		0	1.33648	1.29645	1.97422	0.637746	0.677774	1.09658	0.760324		0	0	0	3.51135	3.51135	3.51135	3.51135	0		0	0	0.332129	3.53958	3.53958	3.20745	3.42887	0.191755		1.84184	1.09658	3.51135	3.42887	1.46921	3.47011
CCTATTAGTTACAAACAGGAA	1700001J11Rik	TRCN0000091350	2.70323	3.1471	3.50758	3.74352		1.7506	1.50345	2.10588	0.952633	1.19977	0.59735	0.916586	0.302826		1.54275	1.42451	3.02523	1.60435	1.72259	0.121867	1.1496	0.892007		2.12135	1.70648	0	1.38623	1.80111	3.50758	2.23164	1.1243		2.45741	0	2.10143	1.28611	3.74352	1.64209	2.22391	1.32801		0.916586	1.1496	2.23164	2.22391	1.03309	2.22777
CGCCTTCCTACACACTGAAAT	1700001K19Rik	TRCN0000342028	1.75154	2.76275	1.93496	2.66255		2.03069	2.32232	1.84301	-0.279156	-0.570784	-0.0914699	-0.313803	0.241528		3.25311	3.66249	2.17906	-0.490363	-0.899738	0.583694	-0.268802	0.766133		1.02044	2.78881	0.0460276	0.91453	-0.853843	1.88894	0.649875	1.39041		4.54208	0.913518	2.85795	-1.87953	1.74903	-0.1954	-0.108634	1.81584		-0.313803	-0.268802	0.649875	-0.108634	-0.291303	0.27062
CAGCCTGAGGGTGAACTAAAG	1700001K19Rik	TRCN0000342026	0.216777	0.192682	0.272694	0.428895		0.119719	0.163939	0.0442899	0.0970579	0.0528387	0.172487	0.107461	0.060499		1.38258	0.652603	0.477225	-1.1899	-0.459921	-0.284543	-0.644787	0.480154		0.41336	0.0879768	0	-0.140667	0.184717	0.272694	0.105581	0.217746		0	0.0948736	0.414495	0.428895	0.334021	0.0144001	0.259106	0.217165		0.107461	-0.644787	0.105581	0.259106	-0.268663	0.182343
CATTCCAACTATCGCAGTTAC	1700001K19Rik	TRCN0000342027	1.73757	1.55039	1.60923	1.23278		0.299514	0.732815	0.0872605	1.43806	1.00476	1.65031	1.36438	0.329024		0.467488	0.562346	1.48145	1.0829	0.988044	0.0689407	0.713295	0.56004		0.179783	1.00436	0	1.42945	0.604867	1.60923	1.21451	0.535568		0	0	1.41368	1.23278	1.23278	-0.180904	0.761549	0.816189		1.36438	0.713295	1.21451	0.761549	1.03884	0.988032
CTGTGGAGACCCAAGAGATAG	1700001K19Rik	TRCN0000352594	0.602961	0.652183	0.590043	0.0965863		0.157516	0.27572	0.128988	0.445446	0.327242	0.473973	0.415554	0.077799		0	0	0	0.652183	0.652183	0.652183	0.652183	0		0	0.0879768	0	0.590043	0.502066	0.590043	0.560717	0.0507934		0	0	0	0.0965863	0.0965863	0.0965863	0.0965863	1.69967e-17		0.415554	0.652183	0.560717	0.0965863	0.533868	0.328652
TCGGGAGTGACAGAGATAAGG	1700001K19Rik	TRCN0000342096	0.776856	1.36275	0.531913	1.44943		0.0809064	0.239413	0	0.695949	0.537443	0.776856	0.670083	0.121785		0	0	0	1.36275	1.36275	1.36275	1.36275	0		0	0	0	0.531913	0.531913	0.531913	0.531913	0		1.87067	0	0	-0.421239	1.44943	1.44943	0.825877	1.08003		0.670083	1.36275	0.531913	0.825877	1.01642	0.678895
CCCTAACAATGTGGATCAGGA	1700001O22Rik	TRCN0000190251	2.91652	2.86532	3.48478	3.27645		1.38687	2.40659	1.26477	1.52965	0.509929	1.65175	1.23044	0.626963		0.968459	1.37234	1.5101	1.89686	1.49299	1.35522	1.58169	0.281505		0.92282	0.861893	0	2.56196	2.62289	3.48478	2.88988	0.516102		0	0	1.43357	3.27645	3.27645	1.84288	2.79859	0.827672		1.23044	1.58169	2.88988	2.79859	1.40607	2.84423
CATCAAATCACTGCCTAGCTT	1700001O22Rik	TRCN0000192465	4.66775	4.49213	3.97388	4.53553		2.81898	2.14722	0.128988	1.84877	2.52053	4.53876	2.96935	1.40004		0.582565	2.57467	3.02523	3.90957	1.91746	1.4669	2.43131	1.29988		0.136894	0.394397	0.0460276	3.83698	3.57948	3.92785	3.78144	0.180705		3.73622	0.0948736	0	0.799307	4.44065	4.53553	3.2585	2.13025		2.96935	2.43131	3.78144	3.2585	2.70033	3.51997
GAATATCTTTCCGAGTGAGCA	1700001O22Rik	TRCN0000192606	4.97494	5.29096	5.30346	5.27044		4.58415	5.07866	4.64235	0.390792	-0.103718	0.332586	0.206553	0.270274		4.23525	4.74777	4.56582	1.05571	0.543188	0.725141	0.77468	0.259827		4.39049	3.74277	3.20699	0.912975	1.56069	2.09647	1.52338	0.592629		4.68873	7.09062	2.08894	0.581705	-1.82018	3.1815	0.647673	2.50149		0.206553	0.77468	1.52338	0.647673	0.490616	1.08553
GCCATCACTACGGGCTTAAAT	1700001P01Rik	TRCN0000184496	3.92936	3.18159	4.00893	3.33701		4.58761	4.32293	4.10004	-0.658253	-0.393577	-0.170686	-0.407505	0.244082		4.33711	3.26481	4.43558	-1.15552	-0.0832175	-1.25399	-0.83091	0.64939		2.28744	3.137	1.77879	1.72149	0.871924	2.23014	1.60785	0.686202		3.98859	1.82739	2.72708	-0.651572	1.50962	0.609929	0.489327	1.08563		-0.407505	-0.83091	1.60785	0.489327	-0.619207	1.04859
GCCTTATAATCCTCAACTGGA	1700001P01Rik	TRCN0000179240	4.00997	4.1702	4.17955	3.93529		3.37882	3.80082	3.33229	0.63115	0.209151	0.677682	0.505995	0.258124		2.71131	3.60713	3.2457	1.45889	0.563071	0.924496	0.982154	0.450686		2.1859	2.41647	2.51113	1.99365	1.76308	1.66842	1.80839	0.167282		0.468312	2.23403	1.71933	3.46697	1.70125	2.21595	2.46139	0.908087		0.505995	0.982154	1.80839	2.46139	0.744074	2.13489
CACACATCGGTGTTTGGAGAA	1700001P01Rik	TRCN0000184707	3.33799	3.7243	3.44596	3.83735		3.48669	2.87144	3.09499	-0.148693	0.466557	0.243002	0.186955	0.311431		3.60129	2.40327	2.89007	0.123009	1.32103	0.834232	0.759422	0.602502		2.39145	3.44254	2.55158	1.05451	0.00342402	0.894385	0.650774	0.56631		0.886866	2.09175	1.95775	2.95049	1.7456	1.87961	2.1919	0.660364		0.186955	0.759422	0.650774	2.1919	0.473189	1.42134
GCGATATCTCAATAGGAGGAA	1700001P01Rik	TRCN0000179271	4.77758	4.55925	4.56913	5.05448		4.71348	4.58949	5.09994	0.0640979	0.188082	-0.322369	-0.0233962	0.266236		4.27572	3.8201	4.30064	0.283526	0.739144	0.258609	0.427093	0.270531		4.31314	5.68802	5.56059	0.255996	-1.11889	-0.991461	-0.618118	0.759681		2.86793	3.76286	4.29018	2.18654	1.29162	0.7643	1.41415	0.718996		-0.0233962	0.427093	-0.618118	1.41415	0.201848	0.398018
AGTGCGTTCCATTCACCATTA	1700003E16Rik	TRCN0000346281	2.89781	3.22633	3.39388	3.74724		3.8346	3.05498	4.33658	-0.93679	-0.157165	-1.43876	-0.844239	0.645792		2.82475	4.41749	3.91517	0.401576	-1.19116	-0.688836	-0.492807	0.814262		1.4464	2.29233	3.25187	1.94748	1.10155	0.142007	1.06368	0.90333		2.26529	4.32913	1.71933	1.48196	-0.581886	2.02791	0.975993	1.3765		-0.844239	-0.492807	1.06368	0.975993	-0.668523	1.01983
TCCAAGCCTCAGGTGATTATG	1700003E16Rik	TRCN0000346283	1.66567	2.32216	2.24644	1.8466		2.73398	3.13127	0.490859	-1.06831	-1.4656	1.17481	-0.453032	1.42368		1.24958	1.14245	2.36308	1.07258	1.17971	-0.0409169	0.737126	0.67593		0.376963	1.32716	0.0906321	1.86948	0.919277	2.15581	1.64819	0.647285		0.0389869	0.458219	0.102944	1.80761	1.38838	1.74366	1.64655	0.225856		-0.453032	0.737126	1.64819	1.64655	0.142047	1.64737
GGCAGAATGGATTGCGTTTAT	1700003E16Rik	TRCN0000342166	2.23164	2.73205	1.96822	2.59802		1.70027	2.44695	1.73905	0.531371	-0.215315	0.492585	0.269547	0.420351		1.44475	0.791515	1.80422	1.28731	1.94054	0.927832	1.38523	0.513404		3.13155	2.93831	0	-1.16333	-0.970088	1.96822	-0.0550636	1.75488		0.630258	2.20242	1.05134	1.96776	0.3956	1.54668	1.30335	0.813837		0.269547	1.38523	-0.0550636	1.30335	0.827386	0.624141
TTTGGAAGCCCATGGTTATTT	1700003E16Rik	TRCN0000346282	2.07391	2.19287	1.18783	1.3935		1.903	1.9366	1.4241	0.170908	0.137311	0.649809	0.319343	0.286685		2.44343	1.79854	2.74091	-0.250552	0.394336	-0.548037	-0.134751	0.481741		0.645271	0.910963	2.5029	0.542554	0.276862	-1.31507	-0.165219	1.00463		1.50349	1.31926	2.01166	-0.109988	0.0742391	-0.618165	-0.217971	0.35861		0.319343	-0.134751	-0.165219	-0.217971	0.0922957	-0.191595
TTCCGCTTCCTCCCTAGAAAC	1700003E16Rik	TRCN0000346225	1.27905	0.362635	1.63707	1.16757		3.53774	1.27143	1.28337	-2.25869	0.00761308	-0.00432546	-0.751801	1.30502		1.12854	1.52351	1.46691	-0.765902	-1.16087	-1.10427	-1.01035	0.213581		1.68838	2.76231	3.4994	-0.0513133	-1.12524	-1.86233	-1.01296	0.910715		2.66482	2.27513	2.64417	-1.49725	-1.10756	-1.4766	-1.36047	0.219269		-0.751801	-1.01035	-1.01296	-1.36047	-0.881075	-1.18672
GAGCCTAAGAAGAAGAGCAAG	1700003E24Rik	TRCN0000200417	3.80434	3.92084	3.82449	4.10453		4.14089	4.85546	5.3197	-0.336549	-1.05112	-1.51536	-0.967674	0.593817		5.51047	5.07601	4.3804	-1.58963	-1.15517	-0.459559	-1.06812	0.570044		4.40412	4.31205	5.79007	-0.579625	-0.48756	-1.96558	-1.01092	0.828037		4.22249	4.40051	4.64391	-0.117962	-0.295988	-0.539381	-0.317777	0.211553		-0.967674	-1.06812	-1.01092	-0.317777	-1.0179	-0.664349
CCTAAGAAGAAGAGCAAGAAA	1700003E24Rik	TRCN0000198135	4.00706	3.42173	4.01954	3.63111		4.45351	3.5827	4.16417	-0.446444	0.424367	-0.157102	-0.0597266	0.443497		4.0139	4.05888	4.99752	-0.592172	-0.63715	-1.57579	-0.935037	0.555364		6.195	4.00252	6.45588	-2.17546	0.0170205	-2.43634	-1.53159	1.34747		2.24041	2.92472	2.25462	1.3907	0.70639	1.37649	1.15786	0.391047		-0.0597266	-0.935037	-1.53159	1.15786	-0.497382	-0.186869
CCATCAACTTCGGCATCCAAA	1700003E24Rik	TRCN0000182137	3.03541	2.79281	2.31698	3.2609		3.73812	3.08086	3.28231	-0.702712	-0.0454486	-0.246902	-0.331688	0.336735		1.75392	4.12343	3.58566	1.03889	-1.33062	-0.792849	-0.361528	1.24225		3.37244	2.70782	3.21709	-1.05546	-0.390833	-0.900107	-0.782132	0.347663		3.24247	1.99666	2.57422	0.018426	1.26424	0.686678	0.656447	0.623456		-0.331688	-0.361528	-0.782132	0.656447	-0.346608	-0.0628426
CTGTTCCAAATGTAACAAGAA	1700003E24Rik	TRCN0000177550	2.07391	2.28034	2.58339	1.31537		2.34102	2.53196	2.09539	-0.267108	-0.45805	-0.0214813	-0.24888	0.218854		3.16352	3.01551	3.18481	-0.883184	-0.735169	-0.904466	-0.840939	0.0922156		1.5964	0.394397	3.21709	0.986989	2.18899	-0.633697	0.847429	1.41651		1.92372	3.58225	3.34644	-0.608343	-2.26687	-2.03107	-1.63543	0.897262		-0.24888	-0.840939	0.847429	-1.63543	-0.54491	-0.394
CTAGAACTTCATCAGCAGTTT	1700003M02Rik	TRCN0000176539	4.66406	4.64001	4.45255	4.66323		3.64474	4.77847	4.10004	1.01933	-0.114411	0.564019	0.489645	0.570516		5.069	3.60713	3.95999	-0.428995	1.03288	0.68002	0.427968	0.762834		3.73075	2.19663	3.91976	0.721799	2.25592	0.532791	1.17017	0.945022		1.97488	1.45063	2.52872	2.68835	3.2126	2.13451	2.67849	0.53911		0.489645	0.427968	1.17017	2.67849	0.458807	1.92433
GCCAAGAAGAATGCAGAGTTA	1700003M02Rik	TRCN0000178527	4.75176	4.32735	4.46619	4.48735		5.23153	5.21928	5.23266	-0.479771	-0.467519	-0.4809	-0.476064	0.0074212		5.59971	5.52945	5.68471	-1.27236	-1.2021	-1.35736	-1.27727	0.077747		5.27639	5.34389	3.6671	-0.810193	-0.877694	0.799095	-0.296264	0.949209		3.81975	4.87333	4.60716	0.6676	-0.385982	-0.119813	0.0539351	0.547859		-0.476064	-1.27727	-0.296264	0.0539351	-0.876669	-0.121164
CATCCATTTGATTAAGGAGAA	1700003M02Rik	TRCN0000176720	4.77587	4.88641	4.93706	4.4918		5.21034	5.2953	5.77962	-0.434467	-0.519436	-1.00375	-0.65255	0.307099		6.05485	5.87784	5.74471	-1.16843	-0.991427	-0.858299	-1.00605	0.155583		5.39033	5.27761	6.40381	-0.453274	-0.340558	-1.46675	-0.753528	0.620235		3.9811	4.88831	5.94428	0.510701	-0.396513	-1.45248	-0.446099	0.982531		-0.65255	-1.00605	-0.753528	-0.446099	-0.829301	-0.599813
CCAGAAACAACAGCAAACTTT	1700003M02Rik	TRCN0000176451	3.693	3.12364	3.48861	3.62303		3.60083	4.07768	3.43567	0.0921699	-0.38468	0.257332	-0.0117258	0.333377		3.36987	3.30711	2.11521	-0.246226	-0.183468	1.00843	0.192911	0.706955		3.38165	2.92643	4.33569	0.106955	0.562181	-0.847078	-0.0593137	0.719192		7.9719	8.00495	2.80549	-4.34888	-4.38192	0.817531	-2.63776	2.99241		-0.0117258	0.192911	-0.0593137	-2.63776	0.0905928	-1.34854
CGTTCCTGCAACTCGGGATTA	1700006A11Rik	TRCN0000341934	1.40805	2.14707	2.00073	2.67042		2.11955	2.31361	2.79795	-0.711502	-0.905569	-1.3899	-1.00233	0.349398		2.15196	0.593063	2.56091	-0.00488773	1.554	-0.413841	0.378425	1.03841		0	0.394397	0	2.00073	1.60633	2.00073	1.86927	0.227705		0	0.0482165	0.0523899	2.67042	2.6222	2.61803	2.63688	0.0291174		-1.00233	0.378425	1.86927	2.63688	-0.31195	2.25307
GGAAAGTCTCTCACCATTATC	1700006A11Rik	TRCN0000341865	3.19206	2.44081	3.44596	3.4871		2.53297	2.9909	3.2015	0.659088	0.201157	-0.009439	0.283602	0.341804		2.15196	2.35031	3.44806	0.288856	0.0904988	-1.00724	-0.209297	0.698124		1.29857	1.83916	2.27064	2.14739	1.6068	1.17532	1.64317	0.487053		1.55819	0.657878	0.601923	1.92891	2.82922	2.88517	2.54777	0.536677		0.283602	-0.209297	1.64317	2.54777	0.0371527	2.09547
CATGCCCTACAGGCAACAATT	1700006A11Rik	TRCN0000341867	0.721188	0.514661	0.826029	0.667705		0	0.0842967	0.998279	0.721188	0.636891	-0.277091	0.360329	0.553629		0.506876	0.13137	0.189063	0.00778507	0.383291	0.325598	0.238891	0.202212		0.0926903	0.461813	0.439997	0.733339	0.364216	0.386032	0.494529	0.207103		0	0.0948736	0	0.667705	0.572831	0.667705	0.63608	0.0547753		0.360329	0.238891	0.494529	0.63608	0.29961	0.565305
ACATGACTGCTTACGCTTTAT	1700006A11Rik	TRCN0000341933	2.36475	2.38271	1.93496	2.45049		2.33278	1.51868	2.25466	0.0319705	0.846071	0.110089	0.329377	0.449172		2.64224	2.07367	1.84977	-0.25953	0.309035	0.532938	0.194147	0.408535		2.84887	1.59078	3.18145	-0.913906	0.344188	-1.24648	-0.605399	0.839011		1.40246	0.140069	1.58352	1.04802	2.31042	0.866972	1.40847	0.786337		0.329377	0.194147	-0.605399	1.40847	0.261762	0.401536
AGCAACCGGATTGGCCAAATA	1700006A11Rik	TRCN0000341935	2.59124	2.40234	1.50733	1.96647		3.81108	2.79845	2.9512	-1.21984	-0.207203	-0.359954	-0.595665	0.545919		2.78525	2.91576	2.33932	-0.382917	-0.513423	0.0630106	-0.277776	0.302258		2.84221	4.25143	1.44264	-1.33488	-2.7441	0.0646913	-1.3381	1.4044		0.551556	3.15684	3.7509	1.41491	-1.19037	-1.78443	-0.519963	1.70177		-0.595665	-0.277776	-1.3381	-0.519963	-0.436721	-0.929031
GTGATCGCAAACCCAACTATG	1700006E09Rik	TRCN0000367284	2.07391	3.00026	2.41672	3.39514		3.097	2.53945	2.24521	-1.02309	-0.465535	-0.171297	-0.553308	0.432627		3.30989	2.27653	1.84977	-0.309634	0.723722	1.15049	0.521525	0.750767		4.71053	1.25298	0.0906321	-2.2938	1.16374	2.32609	0.398676	2.40309		0	0.0482165	1.10193	3.39514	3.34692	2.29321	3.01176	0.622749		-0.553308	0.521525	0.398676	3.01176	-0.015891	1.70522
TACCCTGTAATCGTTTCTAAT	1700006E09Rik	TRCN0000367281	1.92171	3.34266	3.51135	3.06594		2.91589	3.50454	2.84253	-0.994184	-1.58283	-0.920816	-1.16594	0.362894		1.58016	2.90967	2.55405	1.76249	0.432985	0.78861	0.994696	0.688295		3.24192	2.63666	0.0460276	0.269434	0.874685	3.46532	1.53648	1.69762		2.19798	2.67124	2.77464	0.867954	0.394693	0.291295	0.517981	0.307464		-1.16594	0.994696	1.53648	0.517981	-0.085624	1.02723
TGGACTGCTGGAATGAGTATC	1700006E09Rik	TRCN0000367283	3.09137	2.65232	3.05	2.1577		3.02215	1.40855	1.28337	0.0692205	1.68282	1.808	1.18668	0.969771		1.17818	2.4627	1.95772	1.47414	0.189627	0.694606	0.786125	0.647131		2.22737	1.64979	2.27064	0.822632	1.40022	0.779368	1.00074	0.346634		0.149999	0	0	2.0077	2.1577	2.1577	2.1077	0.0866018		1.18668	0.786125	1.00074	2.1077	0.986403	1.55422
TGGCACACACACATTACATTT	1700006E09Rik	TRCN0000367282	3.3005	3.18159	2.61173	3.10128		0.194347	0.566928	0	3.10615	2.73357	3.3005	3.04674	0.288096		1.61663	0.212743	2.73485	1.56496	2.96885	0.446736	1.66018	1.26375		0.0470894	0.249307	0	2.56464	2.36242	2.61173	2.51293	0.132453		0	0.140069	0.0523899	3.10128	2.96122	3.04889	3.03713	0.0707714		3.04674	1.66018	2.51293	3.03713	2.35346	2.77503
ATCAGAAACACAACAAGATAT	1700006E09Rik	TRCN0000367208	2.67421	2.76275	3.43807	4.28445		1.04762	3.49302	3.69031	1.62658	-0.818816	-1.0161	-0.069446	1.47211		0.722981	1.66033	1.19422	2.03977	1.10242	1.56853	1.57024	0.468678		6.99483	3.84099	5.57244	-3.55676	-0.402923	-2.13437	-2.03135	1.57944		2.09074	1.15283	0.736097	2.19372	3.13163	3.54836	2.9579	0.693829		-0.069446	1.57024	-2.03135	2.9579	0.750396	0.463274
TCAGCACAGTGCTCCATTAAA	1700007B14Rik	TRCN0000347112	2.59899	2.85111	3.00264	3.2661		3.11632	2.8354	2.81083	-0.517338	-0.236417	-0.211842	-0.321866	0.169729		4.19362	4.83388	4.34107	-1.34251	-1.98278	-1.48996	-1.60508	0.335299		1.71779	0.758443	2.22134	1.28485	2.24419	0.781296	1.43678	0.743189		0.439461	0	4.24868	2.82664	3.2661	-0.982578	1.70339	2.33647		-0.321866	-1.60508	1.43678	1.70339	-0.963474	1.57008
TTCGTATCATGGGCCAAATTT	1700007B14Rik	TRCN0000347111	0.980251	1.44076	1.70441	2.05326		0.365594	1.01643	0.522515	0.614657	-0.0361764	0.457736	0.345406	0.339646		1.66966	1.81166	1.32898	-0.228899	-0.3709	0.11178	-0.162673	0.248061		1.39273	0.249307	1.39007	0.311682	1.4551	0.314337	0.693707	0.659388		0.410021	0.964661	0.0523899	1.64324	1.0886	2.00087	1.57757	0.459667		0.345406	-0.162673	0.693707	1.57757	0.0913663	1.13564
GAAAGATCTGCAACCTATAAA	1700007B14Rik	TRCN0000347033	2.24157	1.55039	3.13055	3.31711		2.58244	2.8354	1.22685	-0.340876	-0.593837	1.01472	0.026669	0.864975		1.54275	1.66033	0.15318	0.00763694	-0.109944	1.39721	0.431634	0.838277		1.9829	2.90236	1.98188	1.14765	0.228192	1.14868	0.841507	0.531146		0.0389869	3.00631	2.78242	3.27812	0.310794	0.534691	1.37453	1.65235		0.026669	0.431634	0.841507	1.37453	0.229152	1.10802
GGAGCCACATGTGTCGAATAT	1700007B14Rik	TRCN0000347032	2.51144	3.259	2.17227	1.55519		2.20325	0.857826	3.05225	0.308197	1.65362	-0.540809	0.473669	1.10653		3.28178	2.05172	2.29061	-0.0227844	1.20727	0.968386	0.717625	0.652243		0.582726	2.77562	0	1.58954	-0.603352	2.17227	1.05282	1.46358		0	0.777118	2.08894	1.55519	0.778076	-0.533748	0.599841	1.05581		0.473669	0.717625	1.05282	0.599841	0.595647	0.82633
TTGCTGACAGGACGCTTTATG	1700007B14Rik	TRCN0000347030	1.27905	1.05078	0.873612	1.71586		1.30504	1.74272	0.208988	-0.02599	-0.463675	1.07006	0.193464	0.790066		1.15357	3.06565	0.0398466	-0.102794	-2.01488	1.01093	-0.368913	1.53036		2.05379	0.249307	2.06246	-1.18018	0.624306	-1.18885	-0.581574	1.04433		2.82396	0	1.88738	-1.1081	1.71586	-0.17152	0.145415	1.43841		0.193464	-0.368913	-0.581574	0.145415	-0.0877244	-0.218079
CCTTGATATTACAGAGGACAT	1700007E05Rik	TRCN0000031047	3.64145	2.8794	3.5775	2.8749		4.24111	3.65339	3.24485	-0.599659	-0.0119431	0.3966	-0.0716675	0.500808		2.18875	3.08739	3.93379	0.690647	-0.207993	-1.05439	-0.19058	0.87265		2.79471	1.93717	0.69238	0.782784	1.64033	2.88512	1.76941	1.05709		0.149999	2.12585	1.41368	2.7249	0.749044	1.46121	1.64505	1.00067		-0.0716675	-0.19058	1.76941	1.64505	-0.131124	1.70723
GAACTCATCTTGGTGCCTATT	1700007E05Rik	TRCN0000092331	4.92345	4.88641	5.35152	4.74187		3.45289	1.89052	3.64429	1.47057	3.03293	1.27916	1.92755	0.962059		3.20602	3.72623	4.71018	1.68039	1.16018	0.176238	1.0056	0.763898		2.77387	2.38208	4.70373	2.57765	2.96944	0.647789	2.06496	1.24284		1.06742	1.37703	0.102944	3.67445	3.36483	4.63892	3.89274	0.664502		1.92755	1.0056	2.06496	3.89274	1.46658	2.97885
GCAACCTAAACCGCCTGGGTT	1700007E05Rik	TRCN0000092162	3.08587	3.24819	3.04482	3.7912		3.19112	3.67734	3.87024	-0.105252	-0.591465	-0.784365	-0.493694	0.349954		1.48475	2.51175	1.34497	1.76344	0.736436	1.90322	1.4677	0.637136		0.582726	4.08501	1.98188	2.46209	-1.0402	1.06294	0.828279	1.7629		0.185182	1.61971	2.13825	3.60602	2.17149	1.65295	2.47682	1.0117		-0.493694	1.4677	0.828279	2.47682	0.487002	1.65255
CTCAATGATGAGGTCATCAAT	1700007E05Rik	TRCN0000087060	3.19206	2.93437	2.59763	2.66255		3.48297	3.47362	2.96854	-0.290907	-0.281555	0.223523	-0.116313	0.294344		2.10139	3.06565	2.95403	0.832979	-0.131287	-0.0196613	0.227344	0.527457		2.48846	1.98378	0.0460276	0.109167	0.613846	2.5516	1.09154	1.28939		0.969914	1.93389	1.94394	1.69264	0.728664	0.718605	1.04664	0.559476		-0.116313	0.227344	1.09154	1.04664	0.0555154	1.06909
TGTGAGACCATCTTCCAATAT	1700007E05Rik	TRCN0000087226	2.09597	1.80756	2.1239	1.90111		0.921495	0.904947	0.247384	1.17447	1.19102	1.84858	1.40469	0.38451		1.78629	1.35452	1.96808	0.0212692	0.453046	-0.160517	0.1046	0.315155		0	0.170896	0.0460276	2.1239	1.953	2.07787	2.05159	0.0884269		0	0	2.3414	1.90111	1.90111	-0.440294	1.12064	1.35181		1.40469	0.1046	2.05159	1.12064	0.754645	1.58612
CAGTGTGACATCAGAGGAGAT	1700007E05Rik	TRCN0000092332	4.00706	3.55046	3.40201	3.42799		3.64141	3.51976	4.36959	0.365658	0.487306	-0.362524	0.16348	0.459575		4.15385	4.19526	4.14948	-0.603383	-0.6448	-0.599015	-0.615733	0.0252675		5.26647	3.63737	2.74537	-1.86446	-0.235352	0.656644	-0.481055	1.27838		3.30379	1.99666	2.627	0.124208	1.43133	0.800998	0.785513	0.653699		0.16348	-0.615733	-0.481055	0.785513	-0.226126	0.152229
CGAGGCATCAGTCTCTTTGAA	1700007E05Rik	TRCN0000087225	0.216777	0	0.0422563	0.0491013		0	0	0	0.216777	0.216777	0.216777	0.216777	3.39935e-17		0	0.13137	0.0398466	0	-0.13137	-0.0398466	-0.0570723	0.0673579		0	0	0	0.0422563	0.0422563	0.0422563	0.0422563	0		0	0	0.102944	0.0491013	0.0491013	-0.0538426	0.0147867	0.0594347		0.216777	-0.0570723	0.0422563	0.0147867	0.0798525	0.0285215
GCGAGAAAGGCAGCTATCAAT	1700007G11Rik	TRCN0000201734	2.11769	2.45967	2.36771	2.79078		3.36677	2.88325	3.52824	-1.24908	-0.765563	-1.41055	-1.14173	0.335626		4.10335	3.161	3.16242	-1.64368	-0.701325	-0.702747	-1.01592	0.543656		1.15549	2.74888	3.94123	1.21222	-0.381166	-1.57352	-0.247487	1.39767		1.27762	2.19173	1.39351	1.51316	0.599057	1.39727	1.16983	0.497688		-1.14173	-1.01592	-0.247487	1.16983	-1.07882	0.461171
GATCTTCATTCGGGACAGAAA	1700007G11Rik	TRCN0000192132	4.0697	3.40236	3.38979	4.15025		3.32586	1.87876	3.87943	0.743836	2.19093	0.190263	1.04168	1.03305		2.46359	2.72091	2.71653	0.938778	0.681449	0.685833	0.768686	0.14732		1.39273	3.36542	0.175905	1.99707	0.0243769	3.21389	1.74511	1.60961		1.00971	2.60831	2.13825	3.14054	1.54194	2.012	2.23149	0.821591		1.04168	0.768686	1.74511	2.23149	0.905181	1.9883
GCTGCATGATGATTTCCTGAA	1700007G11Rik	TRCN0000192542	3.23741	3.24819	3.55943	3.35177		3.07248	3.57907	3.12107	0.164931	-0.341658	0.116339	-0.0201291	0.27951		3.41197	3.88671	3.75382	-0.163784	-0.638517	-0.505632	-0.435978	0.244912		3.85834	2.70782	4.15321	-0.298915	0.851611	-0.593786	-0.0136966	0.763744		4.02545	3.78792	1.49164	-0.673688	-0.436156	1.86013	0.250094	1.39938		-0.0201291	-0.435978	-0.0136966	0.250094	-0.228053	0.118199
GCAGGAAGTGTCAGGATATAT	1700007G11Rik	TRCN0000201156	2.85319	2.76275	2.65322	2.4321		1.99981	2.50927	2.20675	0.853379	0.343922	0.646437	0.614579	0.256218		1.68691	1.47486	1.39191	1.07584	1.28789	1.37084	1.24486	0.152133		4.01162	1.67841	1.45974	-1.3584	0.97481	1.19348	0.269965	1.41443		1.15875	0.493474	1.99837	1.27334	1.93862	0.433724	1.21523	0.75413		0.614579	1.24486	0.269965	1.21523	0.929718	0.742597
CTACGCACATGTGGTTCTCTT	1700007G11Rik	TRCN0000201544	2.82045	2.14707	2.69355	2.08892		3.22267	2.66794	2.31917	-0.402213	0.152515	0.501279	0.0838603	0.455642		2.50308	2.85369	2.33132	-0.35601	-0.706621	-0.184251	-0.415628	0.266239		5.56328	2.73532	4.8982	-2.86973	-0.0417699	-2.20465	-1.70538	1.47861		2.68339	1.85476	1.41368	-0.594469	0.234162	0.675241	0.104978	0.644637		0.0838603	-0.415628	-1.70538	0.104978	-0.165884	-0.800202
CTACTGATAGGACTTGTGCTT	1700007K09Rik	TRCN0000192069	3.9747	3.57662	4.3085	3.83035		3.14012	2.52444	3.93342	0.83458	1.45026	0.0412785	0.775373	0.706354		2.97275	2.43753	1.37643	0.603865	1.13909	2.20018	1.31438	0.812467		3.28184	1.52925	2.05122	1.02666	2.77925	2.25727	2.02106	0.899853		0.439461	1.17471	1.75138	3.39089	2.65564	2.07897	2.7085	0.657555		0.775373	1.31438	2.02106	2.7085	1.04488	2.36478
GTGCTTTGTCTTTACTCCAAA	1700007K09Rik	TRCN0000200703	5.56592	5.34014	5.92041	5.36436		6.12606	5.65277	5.8716	-0.560144	-0.0868539	-0.305678	-0.317559	0.236869		6.32862	6.22719	6.23772	-0.988485	-0.887054	-0.897583	-0.924374	0.0557706		6.12814	5.05557	6.2007	-0.207732	0.864838	-0.280284	0.125607	0.64122		4.78361	5.51385	5.68696	0.580753	-0.149488	-0.322598	0.0362223	0.479455		-0.317559	-0.924374	0.125607	0.0362223	-0.620966	0.0809147
GTAGCATAAGGGAAGGACTCT	1700007K09Rik	TRCN0000190794	3.89203	3.47831	3.89825	3.22396		3.79318	4.78005	4.1157	0.0988473	-0.888023	-0.223663	-0.337613	0.503206		3.80462	3.83624	5.21217	-0.32631	-0.357929	-1.73386	-0.806033	0.803677		5.06816	4.48406	2.51113	-1.16991	-0.58581	1.38712	-0.122868	1.3399		5.4748	3.94898	2.57422	-2.25084	-0.725017	0.649736	-0.775375	1.45095		-0.337613	-0.806033	-0.122868	-0.775375	-0.571823	-0.449121
GTATGTGGTGTCTATGCAGAT	1700007K09Rik	TRCN0000192885	3.20226	3.52383	3.30556	2.94791		2.43635	2.80467	3.79447	0.765915	0.397592	-0.592202	0.190435	0.702357		3.28178	3.01551	2.82883	0.242048	0.508319	0.694997	0.481788	0.227637		4.26166	4.4471	4.90602	-0.956104	-1.14154	-1.60046	-1.2327	0.331711		3.51901	0.183891	2.85057	-0.571098	2.76402	0.0973409	0.763421	1.76451		0.190435	0.481788	-1.2327	0.763421	0.336112	-0.234641
CCAGACAGCTATGTTACACAA	1700008F21Rik	TRCN0000190348	3.06366	2.09976	3.2161	3.31711		1.41835	2.39013	2.75195	1.64532	0.673533	0.311707	0.876852	0.689661		1.78629	1.35452	0.477225	0.313465	0.745242	1.62253	0.893747	0.66705		0.582726	0.323675	0	2.63338	2.89243	3.2161	2.91397	0.291959		0.0389869	0.0948736	0	3.27812	3.22223	3.31711	3.27249	0.047687		0.876852	0.893747	2.91397	3.27249	0.8853	3.09323
GATCTCATCTGATCAAAGTAA	1700008F21Rik	TRCN0000191658	3.66377	3.78537	4.372	3.53528		5.17852	4.06736	5.32644	-1.51475	-0.403593	-1.66267	-1.19367	0.688215		3.76049	4.26369	4.65351	0.0248807	-0.478317	-0.86814	-0.440525	0.447708		2.98206	3.89077	3.33301	1.38995	0.481236	1.03899	0.970058	0.458261		3.12508	1.37703	5.62561	0.410195	2.15825	-2.09033	0.159371	2.13536		-1.19367	-0.440525	0.970058	0.159371	-0.817099	0.564714
CCAGAGTCAGAATAAATCAAA	1700008F21Rik	TRCN0000191228	4.08632	4.03212	4.32571	3.32211		5.03361	5.97811	5.15147	-0.94729	-1.89179	-1.06516	-1.30141	0.514668		5.67296	5.19217	5.26356	-1.64084	-1.16005	-1.23144	-1.34411	0.259441		4.82978	4.37898	4.18955	-0.504068	-0.0532722	0.136157	-0.140394	0.328884		3.97608	4.44171	3.6225	-0.653975	-1.1196	-0.300387	-0.691321	0.410882		-1.30141	-1.34411	-0.140394	-0.691321	-1.32276	-0.415858
GCTATGTTACACAAAGCTTTA	1700008F21Rik	TRCN0000191792	4.48763	3.82227	4.4368	4.75857		4.88522	4.85696	5.26109	-0.397593	-0.369328	-0.77346	-0.51346	0.225609		4.72726	4.16236	4.76767	-0.904983	-0.340084	-0.945395	-0.730154	0.338414		4.57451	4.87569	5.08341	-0.137715	-0.438898	-0.646613	-0.407742	0.255875		5.55852	3.9071	3.01139	-0.799951	0.851469	1.74718	0.599565	1.29211		-0.51346	-0.730154	-0.407742	0.599565	-0.621807	0.0959114
GAATCCAAAGAGAGGTCTCAT	1700008I05Rik	TRCN0000106335	3.72872	3.31185	4.09926	3.5048		1.86924	2.22355	1.88013	1.85949	1.50517	1.84859	1.73775	0.201492		2.20081	2.08452	2.95923	1.11104	1.22733	0.352617	0.896994	0.475016		0.0926903	2.31073	2.92237	4.00657	1.78853	1.17689	2.324	1.4889		0.57827	0.594347	0	2.92653	2.91046	3.5048	3.11393	0.338601		1.73775	0.896994	2.324	3.11393	1.31737	2.71896
CCAGTCTTACAACAGTGCTAT	1700008I05Rik	TRCN0000106337	3.15052	3.62754	3.18343	3.34687		1.37087	2.48622	1.48963	1.77965	0.664303	1.66088	1.36828	0.612546		2.04898	2.47099	0.812393	1.57856	1.15655	2.81515	1.85009	0.861992		2.39145	1.67841	0.0460276	0.791985	1.50502	3.13741	1.81147	1.20237		0	1.55444	0.736097	3.34687	1.79243	2.61077	2.58335	0.777582		1.36828	1.85009	1.81147	2.58335	1.60918	2.19741
GCATGTGTTTAGCCCGTACTA	1700008I05Rik	TRCN0000106339	3.13463	3.68477	3.86036	3.38561		3.78113	2.42287	2.96854	-0.646503	0.711752	0.166087	0.0771123	0.683485		2.66853	2.12712	1.27991	1.01624	1.55764	2.40486	1.65958	0.6999		1.82974	2.21629	1.84538	2.03062	1.64408	2.01499	1.89656	0.218798		2.02429	3.08354	2.25462	1.36132	0.302076	1.13099	0.931463	0.557099		0.0771123	1.65958	1.89656	0.931463	0.868347	1.41401
CGTCAGAATCTTCTAAGAAAT	1700008I05Rik	TRCN0000106336	3.68211	3.05088	3.5448	3.98975		4.4013	4.57318	4.35428	-0.719194	-0.891071	-0.672171	-0.760812	0.115232		4.59872	4.0367	4.27582	-1.54783	-0.98582	-1.22494	-1.25286	0.282045		5.96225	4.8539	4.79079	-2.41744	-1.3091	-1.24598	-1.65751	0.658879		4.83851	2.70922	3.80152	-0.848764	1.28052	0.188229	0.206662	1.06476		-0.760812	-1.25286	-1.65751	0.206662	-1.00684	-0.725423
GCAGACTATGAGATCCAAATT	1700008I05Rik	TRCN0000106338	1.69486	1.147	1.24322	0.428895		1.25361	0.507105	0.642617	0.44125	1.18776	1.05224	0.893751	0.397691		0.205492	0.17263	0.0398466	0.941509	0.974371	1.10716	1.00768	0.0877021		1.39273	0.587872	0	-0.149507	0.655345	1.24322	0.583019	0.699174		0.317916	0.594347	0	0.110979	-0.165451	0.428895	0.124807	0.297414		0.893751	1.00768	0.583019	0.124807	0.950715	0.353913
GGAGACTTCGGAAGACTTTAC	1700008O03Rik	TRCN0000341821	2.73168	1.8933	2.73922	2.58143		4.19187	4.16253	3.62619	-1.46019	-1.43085	-0.894511	-1.26185	0.318463		3.25311	4.70095	5.41233	-1.35981	-2.80765	-3.51903	-2.56217	1.10034		1.21856	5.06644	4.69653	1.52067	-2.32722	-1.95731	-0.921289	2.12287		2.28164	4.24112	2.11381	0.299791	-1.65969	0.467619	-0.297428	1.18274		-1.26185	-2.56217	-0.921289	-0.297428	-1.91201	-0.609359
ACAGCATCCGCTACGAGAATA	1700008O03Rik	TRCN0000341891	1.66567	2.17015	2.6047	2.60625		3.04753	2.39013	0.699116	-1.38187	-0.72446	0.966552	-0.379925	1.21153		2.80118	3.5018	1.3128	-0.63103	-1.33164	0.857348	-0.368442	1.11787		2.86867	1.13402	0.830287	-0.263969	1.47068	1.77441	0.993706	1.09972		5.99757	0.267734	2.13825	-3.39132	2.33851	0.467994	-0.194939	2.92188		-0.379925	-0.368442	0.993706	-0.194939	-0.374184	0.399383
GCTCATCACCGTCACAGACTT	1700008O03Rik	TRCN0000352503	2.73871	3.18159	2.90869	1.55519		3.05256	1.60682	1.58267	-0.313852	1.13188	1.15604	0.658023	0.841755		2.04898	0.593063	1.72088	1.13261	2.58853	1.46071	1.72728	0.763688		0.261916	0	0	2.64677	2.90869	2.90869	2.82138	0.151218		1.7348	0	2.17416	-0.179604	1.55519	-0.618966	0.252208	1.1496		0.658023	1.72728	2.82138	0.252208	1.19265	1.53679
TGGTGCGCCACGACGATTTAC	1700008O03Rik	TRCN0000341888	0.663285	0.192682	0	0.977731		0.0809064	0.124667	0.753485	0.582379	0.538618	-0.0901999	0.343599	0.376318		0.0541816	0.0451324	0	0.1385	0.147549	0.192682	0.159577	0.0290243		0.0470894	0	0	-0.0470894	0	0	-0.0156965	0.0271871		0.680438	0	0.0523899	0.297293	0.977731	0.925341	0.733455	0.378635		0.343599	0.159577	-0.0156965	0.733455	0.251588	0.358879
CGGCAGGTCATCTCGGAATAT	1700008O03Rik	TRCN0000341822	0	0	0	0		0	0.124667	0	0	-0.124667	0	-0.0415557	0.0719766		0	0	0.0398466	0	0	-0.0398466	-0.0132822	0.0230055		0	0	0	0	0	0	0	0		0	0	0	0	0	0	0	0		-0.0415557	-0.0132822	0	0	-0.027419	0
CAACCAGTTCCGTAGTCTTTC	1700008P02Rik	TRCN0000342189	2.24157	2.53274	2.20053	2.55617		3.18198	3.65683	2.19698	-0.940417	-1.41527	0.0445865	-0.770367	0.744636		2.56969	3.05466	2.86255	-0.0369551	-0.521923	-0.329817	-0.296232	0.244222		1.15549	0.170896	3.1396	1.04504	2.02964	-0.93907	0.711869	1.51214		0	1.01405	0	2.55617	1.54212	2.55617	2.21815	0.585464		-0.770367	-0.296232	0.711869	2.21815	-0.533299	1.46501
TTCATTCTATCCTACCTTAAT	1700008P02Rik	TRCN0000342190	2.25142	3.38273	2.46412	3.28672		1.25361	1.64895	1.33777	0.997812	0.60247	0.913656	0.837979	0.208253		0.205492	0.53096	0.615497	3.17724	2.85177	2.76724	2.93208	0.216479		0.871418	1.46498	0	1.5927	0.999138	2.46412	1.68532	0.736869		0.0769479	0.140069	1.37306	3.20977	3.14665	1.91366	2.75669	0.730772		0.837979	2.93208	1.68532	2.75669	1.88503	2.22101
TCAGGTTGATAGGTGCTTAAA	1700008P02Rik	TRCN0000342135	1.39031	2.19287	1.36475	0.352715		2.4131	1.68989	1.10668	-1.02279	-0.29958	0.28363	-0.346247	0.65446		2.70285	1.2997	1.5101	-0.509978	0.89317	0.682773	0.355322	0.75672		1.68838	2.13601	0	-0.323631	-0.771256	1.36475	0.0899548	1.12646		1.37225	1.19627	1.51049	-1.01954	-0.843555	-1.15777	-1.00695	0.157487		-0.346247	0.355322	0.0899548	-1.00695	0.00453706	-0.4585
AGGAGAACACCAGCAACAAAG	1700008P02Rik	TRCN0000342132	2.39175	2.8794	1.90092	1.50328		2.58244	1.2893	0	-0.190693	1.10245	2.39175	1.10117	1.29122		2.04898	1.24272	0.534134	0.830417	1.63667	2.34526	1.60412	0.757948		3.59474	0.249307	0	-1.69382	1.65162	1.90092	0.619574	2.00733		0	0.140069	1.07686	1.50328	1.36321	0.426423	1.09764	0.585495		1.10117	1.60412	0.619574	1.09764	1.35264	0.858607
TGCTCTTCCTGCCTTACTAAA	1700008P02Rik	TRCN0000342191	3.43634	3.21527	3.13055	3.09545		2.39739	1.57804	0.726557	1.03895	1.85831	2.70979	1.86902	0.835468		0.342429	0	0	2.87284	3.21527	3.21527	3.10113	0.197702		2.51383	0.526219	0	0.616726	2.60433	3.13055	2.1172	1.32582		2.73179	1.921	0.373899	0.363667	1.17446	2.72155	1.41989	1.19795		1.86902	3.10113	2.1172	1.41989	2.48507	1.76855
GATGCAAGTCAGCTTCCTGAA	1700008P20Rik	TRCN0000182423	3.68575	3.62754	4.53994	4.20814		4.16196	4.49063	4.32988	-0.476217	-0.804887	-0.644137	-0.641747	0.164348		4.08068	3.27432	2.59474	-0.453142	0.353227	1.0328	0.310961	0.743871		3.80112	2.1565	2.15987	0.738822	2.38344	2.38006	1.83411	0.948546		3.85021	2.02103	2.12608	0.35793	2.18711	2.08206	1.54237	1.0271		-0.641747	0.310961	1.83411	1.54237	-0.165393	1.68824
CCTCTTCAACATGTACGACCA	1700008P20Rik	TRCN0000182116	2.7457	2.85111	3.17871	2.86807		4.43631	3.76615	3.58556	-1.69062	-1.02045	-0.839859	-1.18364	0.448242		2.9937	4.22008	4.22055	-0.14259	-1.36897	-1.36944	-0.960334	0.708186		3.16928	3.98544	4.21999	0.00942211	-0.806735	-1.04128	-0.612864	0.551528		3.44836	1.50347	2.94366	-0.580295	1.3646	-0.0755929	0.236237	1.00925		-1.18364	-0.960334	-0.612864	0.236237	-1.07199	-0.188314
GTGAAGATGCAAGTCAGCTTC	1700008P20Rik	TRCN0000182577	4.27453	3.70071	4.00626	3.4046		5.75747	4.45347	3.82017	-1.48293	-0.178941	0.454367	-0.402502	0.987809		2.51278	3.39689	4.27791	1.18792	0.303815	-0.577199	0.304847	0.882562		4.3698	3.41729	5.35427	-0.363541	0.588975	-1.34801	-0.374193	0.968538		0.410021	3.33746	1.76714	2.99458	0.0671458	1.63746	1.5664	1.46501		-0.402502	0.304847	-0.374193	1.5664	-0.0488275	0.596102
GCTTCCTGAATCTAGAAGCCA	1700008P20Rik	TRCN0000182578	2.51963	3.52383	3.08074	1.92761		3.65798	2.33097	3.06843	-1.13836	0.188654	-0.548802	-0.499502	0.664877		3.12607	2.54355	2.08696	0.397759	0.980274	1.43687	0.9383	0.520824		2.47991	2.622	1.50987	0.600831	0.458736	1.57087	0.876813	0.605256		2.55478	0.458219	0.998915	-0.627177	1.46939	0.928692	0.590301	1.08847		-0.499502	0.9383	0.876813	0.590301	0.219399	0.733557
GCGGTTCCTCTTCAACATGTA	1700008P20Rik	TRCN0000182335	4.16405	4.25362	4.18427	3.13579		3.20473	4.14546	3.25901	0.959326	0.0185866	0.905041	0.627651	0.528163		3.72335	2.7755	1.88301	0.530265	1.47812	2.37061	1.45966	0.920311		4.61999	4.52403	2.46951	-0.435718	-0.339759	1.71476	0.313095	1.21483		0.949596	3.54493	1.60121	2.18619	-0.409138	1.53458	1.10388	1.35021		0.627651	1.45966	0.313095	1.10388	1.04366	0.708487
CAATGACCACAGGAACAAGGT	1700009J07Rik	TRCN0000198716	3.29574	3.00026	2.33409	3.81978		2.78316	2.9909	2.957	0.512579	0.304837	0.338741	0.385386	0.111449		2.33817	2.85369	2.45437	0.662083	0.146567	0.545889	0.451513	0.270406		0.762771	0.461813	0.856354	1.57132	1.87228	1.47774	1.64045	0.206154		0	0	0.453979	3.81978	3.81978	3.3658	3.66845	0.262105		0.385386	0.451513	1.64045	3.66845	0.418449	2.65445
GATCTCACTTGGCAATGACCA	1700009J07Rik	TRCN0000181629	4.10547	3.76277	3.85445	3.99602		3.55554	2.8354	3.2543	0.549925	1.27006	0.851162	0.890384	0.361668		3.94746	3.65886	4.0383	-0.184687	0.103908	-0.275533	-0.118771	0.198123		1.13384	2.77562	0.931844	2.72061	1.07883	2.9226	2.24068	1.01125		0.468312	2.05682	0.998915	3.52771	1.9392	2.99711	2.82134	0.80871		0.890384	-0.118771	2.24068	2.82134	0.385807	2.53101
GATGACTACAGGACCACAGTT	1700009J07Rik	TRCN0000181882	3.44925	3.58523	3.98746	4.73626		2.30779	2.62637	1.61239	1.14146	0.822884	1.83686	1.26707	0.518526		2.78525	1.75845	2.05815	0.799978	1.82678	1.52708	1.38461	0.52802		1.80256	3.96235	0.633302	2.1849	0.0251106	3.35416	1.85472	1.68891		2.53446	0.805449	0	2.20179	3.93081	4.73626	3.62295	1.29497		1.26707	1.38461	1.85472	3.62295	1.32584	2.73884
CACAGGATCTCACTTGGCAAT	1700009J07Rik	TRCN0000182046	3.49975	3.66052	3.52259	3.69034		3.34236	3.81938	3.91266	0.157389	-0.319632	-0.412911	-0.191718	0.305912		4.3561	3.71231	3.92051	-0.695583	-0.0517866	-0.259992	-0.335787	0.328523		3.98466	3.65187	2.92237	-0.462071	-0.129287	0.600215	0.00295259	0.543349		2.61408	4.78717	2.90144	1.07627	-1.09682	0.788902	0.256114	1.18046		-0.191718	-0.335787	0.00295259	0.256114	-0.263753	0.129533
CAATGACCACAGGACCATAGT	1700009J07Rik	TRCN0000198715	1.35417	1.47823	2.2644	0		0.428779	0.124667	0.356797	0.925387	1.2295	0.99737	1.05075	0.158929		0	0.432486	0.356195	1.47823	1.04575	1.12204	1.21534	0.230846		0	0	2.01697	2.2644	2.2644	0.247434	1.59208	1.1645		0	0	0	0	0	0	0	0		1.05075	1.21534	1.59208	0	1.13305	0.796039
CGCCACTTGACTGGTGAATTT	1700009N14Rik	TRCN0000267043	2.98902	2.89334	1.97914	3.75096		1.92509	2.92956	4.23275	1.06394	0.0594629	-1.24373	-0.0401094	1.15705		2.84794	1.55506	2.63432	0.0453938	1.33828	0.259013	0.547563	0.693063		0.41336	1.00436	0.0460276	1.56578	0.974777	1.93311	1.49122	0.483498		0.149999	2.50844	2.26576	3.60096	1.24252	1.4852	2.10956	1.29728		-0.0401094	0.547563	1.49122	2.10956	0.253727	1.80039
TTGTGCTGTGTGGTAACAAAG	1700009N14Rik	TRCN0000267045	2.37381	3.26972	2.351	2.37547		2.7892	1.5925	2.52853	-0.415387	0.781306	-0.154725	0.0703979	0.629308		0.252597	1.82466	0.901603	3.01713	1.44506	2.36812	2.27677	0.790002		0.871418	0.758443	0	1.47958	1.59256	2.351	1.80771	0.473879		0	0	1.37306	2.37547	2.37547	1.00241	1.91778	0.792738		0.0703979	2.27677	1.80771	1.91778	1.17358	1.86275
TCGATGTAACATCAAGAATTA	1700009N14Rik	TRCN0000267042	2.59124	2.40234	2.97017	1.68513		1.66133	2.77961	1.44077	0.929909	-0.188364	1.15048	0.630674	0.717829		0.996403	0.17263	0.588883	1.40593	2.22971	1.81345	1.81636	0.411894		0.0470894	1.00436	0	2.92308	1.96581	2.97017	2.61969	0.566765		0.496597	0	1.30991	1.18853	1.68513	0.375224	1.08296	0.661303		0.630674	1.81636	2.61969	1.08296	1.22352	1.85133
CGGACTGTGGCAGTTACAAAC	1700009N14Rik	TRCN0000267041	0.295122	0.0995552	0.162071	0.0965863		0.119719	0.0842967	0.169543	0.175402	0.210825	0.125579	0.170602	0.0428253		0	0.0451324	0.116383	0.0995552	0.0544227	-0.0168277	0.0457167	0.0586778		0.0470894	0	0.0460276	0.114982	0.162071	0.116043	0.131032	0.0268858		0	0	0	0.0965863	0.0965863	0.0965863	0.0965863	1.69967e-17		0.170602	0.0457167	0.131032	0.0965863	0.108159	0.113809
ACCTTCAGTATTACGACATTT	1700009N14Rik	TRCN0000267044	3.58018	4.0067	2.66679	3.63111		2.9753	2.47064	3.46447	0.604883	1.10954	0.115709	0.610045	0.496937		2.58817	4.36506	3.36029	1.41853	-0.358359	0.646406	0.568858	0.890978		1.48111	3.74277	4.29576	1.18568	-1.07598	-1.62897	-0.506424	1.49126		5.33004	1.7124	1.12658	-1.69893	1.91871	2.50453	0.908104	2.27668		0.610045	0.568858	-0.506424	0.908104	0.589452	0.20084
CAAGAAGATTAGAAGGCCCAA	1700010D01Rik	TRCN0000177688	4.36358	4.14129	4.54912	4.53337		5.99585	4.2609	5.38788	-1.63227	0.102686	-1.0243	-0.851293	0.880319		4.94185	5.30895	4.79848	-0.800559	-1.16767	-0.657195	-0.87514	0.263281		3.94791	4.68433	5.70297	0.601215	-0.135205	-1.15384	-0.229278	0.881303		3.06968	2.95032	4.50513	1.46369	1.58305	0.0282409	1.025	0.865275		-0.851293	-0.87514	-0.229278	1.025	-0.863216	0.397859
CAACCACAACATCTAAACCCA	1700010D01Rik	TRCN0000177774	3.02969	3.33246	3.49623	2.35609		2.2301	3.65339	1.93997	0.799591	-0.623697	1.08972	0.421873	0.917037		1.56158	3.72969	3.77168	1.77088	-0.39723	-0.43922	0.311477	1.26405		3.32546	2.81483	4.14794	0.170766	0.681402	-0.651717	0.0668172	0.672611		0.704888	1.27942	2.26576	1.6512	1.07667	0.0903287	0.939401	0.789438		0.421873	0.311477	0.0668172	0.939401	0.366675	0.503109
GTTCCAGTCCAAATGTAGCAA	1700010D01Rik	TRCN0000198348	3.66745	4.05711	4.15809	3.98975		3.90573	4.5212	4.84686	-0.238281	-0.853745	-1.17941	-0.757145	0.477943		4.62804	5.08279	5.47181	-0.570932	-1.02569	-1.4147	-1.00377	0.422311		4.09241	5.04737	5.70207	0.065685	-0.889276	-1.54398	-0.78919	0.809486		4.10569	4.69174	5.27917	-0.115942	-0.701994	-1.28942	-0.702453	0.586741		-0.757145	-1.00377	-0.78919	-0.702453	-0.880459	-0.745822
CAATCTGATACAGGATGTTGT	1700010D01Rik	TRCN0000176603	3.40135	3.4503	3.35669	3.29692		3.49778	2.1954	3.81698	-0.096428	1.20595	-0.415629	0.231298	0.859031		4.00361	4.60059	2.95923	-0.553313	-1.15029	0.491067	-0.40418	0.83078		4.94148	3.59295	4.08043	-1.58479	-0.236263	-0.723747	-0.848266	0.682831		3.3626	3.08354	1.63596	-0.0656792	0.213384	1.66096	0.602889	0.926882		0.231298	-0.40418	-0.848266	0.602889	-0.0864405	-0.122688
GCATCTAAGAACAATATAGCA	1700010D01Rik	TRCN0000197877	4.32209	4.19855	3.99823	4.01468		2.60996	3.12132	3.61155	1.71212	1.20076	0.710539	1.20781	0.500828		3.36452	3.3527	2.94356	0.834029	0.845846	1.25498	0.978286	0.2397		2.94524	1.96067	2.94076	1.05299	2.03757	1.05747	1.38268	0.567156		3.87197	3.80906	2.91565	0.142713	0.205617	1.09903	0.482452	0.534895		1.20781	0.978286	1.38268	0.482452	1.09305	0.932564
CAAGAGAGTGATGAACTGCCT	1700010D01Rik	TRCN0000182031	3.95974	4.19855	4.02482	3.47816		5.89527	5.01162	4.40823	-1.93553	-1.05187	-0.448487	-1.1453	0.747911		6.51885	5.52945	5.87778	-2.3203	-1.3309	-1.67923	-1.77681	0.501865		5.92649	5.6578	7.14467	-1.90167	-1.63298	-3.11985	-2.21816	0.792353		5.9453	4.2795	6.32512	-2.46714	-0.801339	-2.84696	-2.03848	1.0881		-1.1453	-1.77681	-2.21816	-2.03848	-1.46105	-2.12832
CTTCATCAGTTCCAGTCCAAA	1700010D01Rik	TRCN0000178687	2.55985	3.17018	2.17227	0.635915		1.21828	2.17632	2.30103	1.34157	0.383532	0.258816	0.661306	0.592417		3.42231	1.57057	2.77672	-0.252125	1.59961	0.39346	0.580315	0.939903		2.96377	2.09413	0	-0.791496	0.0781392	2.17227	0.486304	1.52346		3.65698	6.16508	1.15081	-3.02107	-5.52917	-0.514894	-3.02171	2.50714		0.661306	0.580315	0.486304	-3.02171	0.620811	-1.2677
GTACATTTCAGGACACCTGAA	1700010I14Rik	TRCN0000181935	4.07248	3.34266	3.77523	3.99602		3.36273	3.98478	3.26838	0.709748	0.0876984	0.804103	0.53385	0.389248		3.71076	4.0283	3.95479	-0.368102	-0.685643	-0.612131	-0.555292	0.166226		2.68734	3.2462	4.06095	1.08789	0.529037	-0.285718	0.443736	0.690766		1.54471	1.25907	0.102944	2.45131	2.73695	3.89308	3.02711	0.763425		0.53385	-0.555292	0.443736	3.02711	-0.0107212	1.73542
CGACAGCTACAAGAAGTTCCT	1700010I14Rik	TRCN0000200220	4.03015	3.7243	4.68369	4.7896		3.13539	3.07056	3.46447	0.894765	0.959593	0.565681	0.80668	0.211213		3.65487	3.54564	3.57891	0.0694257	0.178654	0.145385	0.131155	0.0559872		4.65651	4.4471	5.82596	0.0271773	0.236584	-1.14228	-0.292839	0.743049		3.24247	0	2.28778	1.54713	4.7896	2.50182	2.94618	1.66628		0.80668	0.131155	-0.292839	2.94618	0.468917	1.32667
GCACAACGACAAACTCAGGAA	1700010I14Rik	TRCN0000200350	3.33336	3.03839	2.69355	3.31711		2.23894	1.75563	0.753485	1.09442	1.57773	2.57987	1.75067	0.75768		2.15196	1.60112	1.49585	0.886436	1.43727	1.54255	1.28875	0.352369		0.339625	1.09208	0	2.35393	1.60147	2.69355	2.21632	0.558895		0.0389869	3.77006	0.736097	3.27812	-0.452957	2.58101	1.80206	1.98376		1.75067	1.28875	2.21632	1.80206	1.51971	2.00919
GTGACTCCTTCCACTTTATAT	1700010I14Rik	TRCN0000177970	4.69329	4.74367	4.86972	4.85664		5.15302	5.35273	5.22306	-0.459728	-0.659438	-0.52977	-0.549645	0.101328		5.60425	4.69211	5.06425	-0.860579	0.0515642	-0.320574	-0.37653	0.458639		4.5502	5.91846	5.19614	0.319518	-1.04874	-0.326422	-0.351882	0.684486		6.20517	3.22134	4.36458	-1.34853	1.6353	0.492064	0.259611	1.50544		-0.549645	-0.37653	-0.351882	0.259611	-0.463088	-0.0461356
CTTGAGAAACACATCAAAGAA	1700010I14Rik	TRCN0000197627	1.22002	1.44076	1.00761	1.00287		2.09053	1.89052	2.81722	-0.870509	-0.670495	-1.5972	-1.04607	0.487659		2.1142	1.64576	2.1611	-0.673439	-0.204999	-0.720344	-0.532927	0.284961		1.08954	1.2144	1.42533	-0.0819289	-0.206791	-0.417712	-0.235477	0.16972		1.17635	0.657878	5.58617	-0.173474	0.344994	-4.5833	-1.47059	2.70812		-1.04607	-0.532927	-0.235477	-1.47059	-0.789498	-0.853035
CAGCTTGACATCACCAAAGAT	1700010M22Rik	TRCN0000112374	2.2806	1.51476	3.02388	2.41347		2.03069	1.91374	2.08483	0.249911	0.366858	0.195772	0.270847	0.0874435		2.82475	2.4205	2.81741	-1.30999	-0.905738	-1.30265	-1.17279	0.231306		2.52218	1.83916	1.6946	0.501697	1.18472	1.32929	1.00523	0.442026		3.15645	1.19627	1.47254	-0.742982	1.2172	0.940924	0.471712	1.06099		0.270847	-1.17279	1.00523	0.471712	-0.450973	0.738473
AGAGTTAGTTGTGGGTAAGAT	1700010M22Rik	TRCN0000112373	4.98531	4.70468	4.94404	5.05748		0.489313	0.950578	0.0442899	4.496	4.03474	4.94102	4.49059	0.453168		0	0.466063	0.879812	4.70468	4.23862	3.82487	4.25605	0.440165		0.221434	0.323675	0	4.7226	4.62036	4.94404	4.76233	0.165455		0	0	0	5.05748	5.05748	5.05748	5.05748	0		4.49059	4.25605	4.76233	5.05748	4.37332	4.90991
GATCAAGACTTCTGGCTTATA	1700010M22Rik	TRCN0000112370	4.44745	4.34267	4.48929	3.80913		3.90017	3.82552	3.74836	0.547283	0.621932	0.699097	0.622771	0.0759105		3.94746	3.9739	4.47245	0.395212	0.368769	-0.129781	0.2114	0.295767		4.60039	2.49902	3.90734	-0.111105	1.99027	0.581945	0.820369	1.07078		3.70928	2.45579	2.78242	0.0998444	1.35333	1.02671	0.82663	0.650257		0.622771	0.2114	0.820369	0.82663	0.417085	0.8235
GAGTTAGTTGTGGGTAAGATA	1700010M22Rik	TRCN0000112372	3.5684	4.38768	3.5739	3.46917		0.518654	1.15931	1.65586	3.04975	2.40909	1.91254	2.45713	0.570123		0	1.22322	0	4.38768	3.16446	4.38768	3.97994	0.706226		0	0.0879768	0	3.5739	3.48593	3.5739	3.54458	0.0507934		1.9341	0	0	1.53507	3.46917	3.46917	2.82447	1.11665		2.45713	3.97994	3.54458	2.82447	3.21853	3.18452
CCAACTGGTAAAGAAAGTGAA	1700010M22Rik	TRCN0000112371	4.30088	4.15292	3.87505	4.01159		4.28872	3.67734	4.15914	0.0121627	0.623545	0.141741	0.25915	0.322158		4.16312	4.48456	5.06545	-0.0101997	-0.331635	-0.912531	-0.418122	0.457341		5.63535	4.93027	5.92011	-1.76029	-1.05521	-2.04506	-1.62019	0.509579		4.20973	4.99671	2.07635	-0.198143	-0.985125	1.93524	0.250658	1.51103		0.25915	-0.418122	-1.62019	0.250658	-0.0794861	-0.684766
GCCTGGACTTTGAGATCGCTA	1700011A15Rik	TRCN0000090462	3.23244	2.68475	2.86815	3.59849		3.91127	3.11131	3.17685	-0.678832	0.121129	0.0555971	-0.167369	0.444151		3.81643	4.20772	3.97291	-1.13168	-1.52298	-1.28817	-1.31428	0.19695		4.26416	3.51574	2.47793	-1.39601	-0.647593	0.390219	-0.551127	0.897012		1.90273	2.38246	1.24386	1.69576	1.21603	2.35464	1.75548	0.571646		-0.167369	-1.31428	-0.551127	1.75548	-0.740822	0.602175
GAATAGGCTCAACCAGGCTAT	1700011A15Rik	TRCN0000090459	3.16102	3.13542	2.93135	3.46917		4.20772	3.07056	2.89788	-1.0467	0.0904552	0.263133	-0.231037	0.711642		3.33746	3.03242	2.69797	-0.202043	0.103	0.437447	0.112801	0.319858		2.33565	3.33877	1.87117	0.595704	-0.407416	1.06018	0.416155	0.75009		2.98237	2.87212	1.41368	0.486801	0.597052	2.05549	1.04645	0.875591		-0.231037	0.112801	0.416155	1.04645	-0.059118	0.731301
CAGTTCCTGTGGCCTGAACAT	1700011A15Rik	TRCN0000090460	3.12929	3.259	3.28371	4.12757		2.56848	1.01643	1.45724	0.56081	2.11286	1.67205	1.44857	0.799795		1.9946	1.63103	2.83451	1.2644	1.62797	0.424489	1.10562	0.61725		2.6497	1.59078	1.72321	0.63401	1.69293	1.5605	1.29582	0.576952		3.34715	1.60367	0.703706	0.78042	2.5239	3.42386	2.24273	1.34396		1.44857	1.10562	1.29582	2.24273	1.2771	1.76927
GATGGAGCCTTGTGAACTACA	1700011A15Rik	TRCN0000090461	4.20013	4.14712	3.65443	4.10743		5.13892	4.88954	5.44165	-0.938785	-0.689405	-1.24152	-0.95657	0.276486		5.81015	5.40189	5.83666	-1.66304	-1.25477	-1.68954	-1.53578	0.243726		5.80761	5.4883	4.1689	-2.15317	-1.83386	-0.514464	-1.5005	0.86873		5.04652	2.96295	4.80526	-0.939098	1.14447	-0.697835	-0.164153	1.13971		-0.95657	-1.53578	-1.5005	-0.164153	-1.24618	-0.832327
GAAGACTAGAAACTGGCGCTT	1700011A15Rik	TRCN0000090458	3.52842	4.49213	3.62693	3.24518		3.43376	4.09556	2.20675	0.0946552	-0.567144	1.32166	0.283057	0.958393		3.068	3.46905	3.09782	1.42413	1.02308	1.39432	1.28051	0.223437		2.94524	3.07376	2.59866	0.681689	0.553165	1.02827	0.754373	0.245748		2.90534	2.85188	2.51944	0.339847	0.393301	0.72574	0.486296	0.20908		0.283057	1.28051	0.754373	0.486296	0.781783	0.620335
TCAAAGATTCCCACCAAATTA	1700011E24Rik	TRCN0000341976	1.1998	1.51476	1.55188	1.48556		1.02735	2.94655	2.49701	0.172446	-1.74675	-1.29721	-0.957173	1.00377		0.654481	1.9838	2.39415	0.860282	-0.469039	-0.879391	-0.162716	0.909391		3.07018	0	2.23134	-1.5183	1.55188	-0.679452	-0.215289	1.58685		0.551556	0.0948736	0.453979	0.934	1.39068	1.03158	1.11875	0.240499		-0.957173	-0.162716	-0.215289	1.11875	-0.559944	0.451732
TTACTGAAGAAGCCCTATTAA	1700011E24Rik	TRCN0000342049	1.98216	0.716321	1.36475	2.10061		0.899358	0	0	1.08281	1.98216	1.98216	1.68238	0.519244		1.15357	0	0	-0.43725	0.716321	0.716321	0.331798	0.666015		0	0.170896	0	1.36475	1.19386	1.36475	1.30779	0.0986666		0	0	0	2.10061	2.10061	2.10061	2.10061	0		1.68238	0.331798	1.30779	2.10061	1.00709	1.7042
CATACTCTTTCAAGGACAAAC	1700011E24Rik	TRCN0000341975	2.06276	3.51484	2.83247	2.92179		4.11231	3.70755	2.70444	-2.04955	-1.64479	-0.641685	-1.44534	0.724814		2.98675	3.22614	3.8689	0.528089	0.288704	-0.354064	0.154243	0.456189		3.89419	3.97394	0.256419	-1.06172	-1.14147	2.57606	0.124289	2.12367		3.93534	2.28522	3.99462	-1.01355	0.636564	-1.07283	-0.483273	0.97026		-1.44534	0.154243	0.124289	-0.483273	-0.64555	-0.179492
ACTCCGATACCTGGTACTTAC	1700011E24Rik	TRCN0000341977	0.95634	0.89322	1.90092	1.96647		0.75889	1.71655	1.76575	0.19745	-0.760207	-0.809412	-0.45739	0.567641		0.939963	1.07876	0.0786222	-0.0467435	-0.185544	0.814598	0.194103	0.541827		1.04384	3.00763	4.12668	0.857082	-1.1067	-2.22576	-0.825128	1.56059		0.57827	0.964661	0.102944	1.3882	1.00181	1.86352	1.41784	0.431623		-0.45739	0.194103	-0.825128	1.41784	-0.131643	0.296357
CCAGCCAGGAGCTTCGTATTT	1700011E24Rik	TRCN0000342050	0.133933	0	0.0833101	0.18711		0.0410203	0	0.0442899	0.0929125	0.133933	0.0896429	0.105496	0.0246811		0	0	0	0	0	0	0	0		0	0	0	0.0833101	0.0833101	0.0833101	0.0833101	0		0	0.0482165	0.0523899	0.18711	0.138894	0.13472	0.153575	0.0291174		0.105496	0	0.0833101	0.153575	0.052748	0.118442
GAGCTGATCTCTACGTGAACA	1700011F14Rik	TRCN0000189751	4.58635	4.65645	4.38232	4.25337		4.93911	5.25382	4.78295	-0.35276	-0.667465	-0.196598	-0.405608	0.239841		4.86056	4.63051	4.90211	-0.20411	0.0259368	-0.245656	-0.141276	0.146293		3.26699	4.19311	3.524	1.11533	0.18921	0.858316	0.720951	0.478095		2.39116	2.85866	3.46231	1.86221	1.39471	0.791059	1.34932	0.537015		-0.405608	-0.141276	0.720951	1.34932	-0.273442	1.03514
CGAGATGGAAATGGCTGACTT	1700011F14Rik	TRCN0000202042	3.41895	2.94779	3.05517	2.83345		3.23598	2.89497	4.34545	0.182977	0.523985	-0.9265	-0.0731791	0.758412		3.41197	4.05613	4.4073	-0.464186	-1.10834	-1.45952	-1.01068	0.5048		3.63382	4.14777	4.30998	-0.578651	-1.0926	-1.25481	-0.975352	0.352997		2.72582	3.09506	2.06364	0.107628	-0.261606	0.769813	0.205278	0.522598		-0.0731791	-1.01068	-0.975352	0.205278	-0.54193	-0.385037
GCTCAGTGAGATTATCAGCGA	1700011F14Rik	TRCN0000189750	5.04463	4.81498	4.81593	5.38124		5.9461	5.77908	5.41765	-0.901469	-0.734446	-0.373019	-0.669645	0.270119		6.29667	5.87628	5.7885	-1.48169	-1.0613	-0.973519	-1.17217	0.271621		5.45941	6.10002	5.82844	-0.64348	-1.28409	-1.01251	-0.980028	0.32154		5.52287	7.42098	6.05675	-0.141627	-2.03974	-0.675515	-0.952295	0.978859		-0.669645	-1.17217	-0.980028	-0.952295	-0.920908	-0.966161
GAGACAGCTCAGTGAGATTAT	1700011F14Rik	TRCN0000201801	5.11786	5.44086	5.09218	4.87378		4.62687	4.37616	3.02488	0.490988	0.741704	2.09298	1.10856	0.861701		4.37751	3.99706	3.41055	1.06335	1.4438	2.03031	1.51249	0.487124		3.9664	4.83495	5.4451	1.12578	0.25723	-0.35292	0.343364	0.743105		4.32857	3.80205	4.08227	0.54521	1.07173	0.791507	0.802815	0.263442		1.10856	1.51249	0.343364	0.802815	1.31052	0.57309
GATTACCAGATGTCGTGGGAA	1700011F14Rik	TRCN0000202397	3.37002	3.58523	3.51135	3.88208		3.27518	3.07056	2.48902	0.0948342	0.299457	0.880997	0.425096	0.407863		3.68093	2.67858	3.29181	-0.0957039	0.906654	0.293417	0.368122	0.505337		3.67563	3.137	4.88402	-0.164279	0.374347	-1.37267	-0.387533	0.894649		4.05666	5.85784	3.11971	-0.174583	-1.97576	0.76237	-0.462659	1.39161		0.425096	0.368122	-0.387533	-0.462659	0.396609	-0.425096
GCAGAACAAAGTCCAACACAA	1700011H14Rik	TRCN0000192791,TRCN0000345941	5.16034	4.83678	4.80982	5.33373		3.8346	3.9059	4.64235	1.32574	1.25444	0.517991	1.03272	0.447195		3.0941	3.592	2.94356	1.74269	1.24478	1.89322	1.6269	0.339373		2.05379	4.28439	2.22134	2.75604	0.525436	2.58848	1.95665	1.2423		2.3836	1.19627	1.49164	2.95013	4.13746	3.84209	3.64323	0.618143		1.03272	1.6269	1.95665	3.64323	1.32981	2.79994
CAGAATGCCTTGGGCTTGTTT	1700011H14Rik	TRCN0000201621,TRCN0000346023	3.94767	4.24277	3.72098	4.08406		3.99977	3.5827	4.0709	-0.0521014	0.364969	-0.123237	0.0632102	0.26374		4.22052	3.68048	2.96442	0.0222503	0.562292	1.27835	0.620965	0.630104		2.79471	3.12665	2.57531	0.926269	0.59433	1.14567	0.888757	0.277578		0.604498	1.57104	2.06364	3.47956	2.51302	2.02042	2.671	0.742288		0.0632102	0.620965	0.888757	2.671	0.342088	1.77988
GTCACACCTTTACAAAGCCAA	1700011H14Rik	TRCN0000201271,TRCN0000346020	4.2624	4.49213	4.72319	5.24827		4.77252	4.74163	5.01486	-0.510122	-0.479237	-0.752466	-0.580608	0.149632		5.33145	5.1149	5.68863	-0.839322	-0.622766	-1.1965	-0.886196	0.289725		4.62194	5.85875	5.80185	0.10125	-1.13556	-1.07867	-0.704327	0.69823		1.81561	4.54404	3.40302	3.43266	0.704233	1.84525	1.99405	1.37029		-0.580608	-0.886196	-0.704327	1.99405	-0.733402	0.644861
GCATTGAATCGGAACCTGGAA	1700011H14Rik	TRCN0000190739,TRCN0000345940	1.33575	1.40228	1.83033	1.37436		1.83466	1.71655	1.69806	-0.498907	-0.380797	-0.362306	-0.414003	0.0741073		1.84894	1.49126	2.274	-0.446661	-0.0889773	-0.871719	-0.469119	0.391854		1.5964	1.32716	0.931844	0.233926	0.503167	0.898485	0.545193	0.334267		3.22567	1.68216	1.82851	-1.85131	-0.307801	-0.454154	-0.87109	0.852048		-0.414003	-0.469119	0.545193	-0.87109	-0.441561	-0.162949
CAGGTAGTAACGGCACAGAAT	1700011H14Rik	TRCN0000190946,TRCN0000345942	0.36943	0.0995552	0.30776	0.0965863		0.157516	0.239413	0.169543	0.211915	0.130017	0.199887	0.180606	0.0442224		0.467488	0.17263	0.224074	-0.367933	-0.0730751	-0.124519	-0.188509	0.1575		0.41336	0.323675	0.0460276	-0.1056	-0.0159149	0.261732	0.046739	0.191514		0.0769479	0.307896	0.0523899	0.0196384	-0.21131	0.0441964	-0.0491584	0.140963		0.180606	-0.188509	0.046739	-0.0491584	-0.00395123	-0.00120971
GTTGGACAAGGTCGTGAATTG	1700012B07Rik	TRCN0000353229	2.39175	2.21524	3.12073	2.51307		3.46047	2.76052	3.88249	-1.06872	-0.368769	-1.49074	-0.976075	0.566692		4.31509	3.53382	4.36283	-2.09984	-1.31857	-2.14759	-1.85534	0.465462		2.40054	3.56256	3.36514	0.720186	-0.441834	-0.244412	0.0113132	0.621787		0.775847	0.527888	1.43357	1.73723	1.98519	1.0795	1.60064	0.468035		-0.976075	-1.85534	0.0113132	1.60064	-1.41571	0.805976
GTGACATCAACGTGCACAAAT	1700012B07Rik	TRCN0000346235	0	0	0.645921	0.0965863		0	1.05871	0	0	-1.05871	0	-0.352905	0.611249		0	0	0	0	0	0	0	0		0	0.249307	0	0.645921	0.396614	0.645921	0.562819	0.143937		0	0	0	0.0965863	0.0965863	0.0965863	0.0965863	1.69967e-17		-0.352905	0	0.562819	0.0965863	-0.176452	0.329702
TATCAGTTTGGGCAGGTCTTC	1700012B07Rik	TRCN0000346295	2.77333	3.35278	3.35669	1.96647		3.42216	2.86549	2.52072	-0.648831	-0.0921607	0.252614	-0.162792	0.454854		4.09044	2.6999	1.53819	-0.73766	0.652879	1.81459	0.576602	1.27783		3.70161	0.958419	2.2803	-0.344926	2.39827	1.07639	1.04325	1.3719		1.90273	3.08354	0.332129	0.0637327	-1.11707	1.63434	0.193667	1.3803		-0.162792	0.576602	1.04325	0.193667	0.206905	0.618456
TCCGGCACCTTATGGACATGA	1700012B07Rik	TRCN0000346296	2.1706	2.4217	1.59511	2.25508		3.12589	2.61932	2.51286	-0.955287	-0.448718	-0.342257	-0.582087	0.327554		3.28178	2.14796	3.16692	-0.860079	0.27374	-0.745222	-0.443853	0.624102		3.27691	2.27369	2.71007	-1.6818	-0.678587	-1.11496	-1.15845	0.503018		1.2109	1.52066	2.20919	1.04418	0.734418	0.0458839	0.60816	0.510983		-0.582087	-0.443853	-1.15845	0.60816	-0.51297	-0.275145
CAACAAAGAGCATCCGAATAT	1700012B07Rik	TRCN0000346234	2.76647	2.76275	1.26122	2.90188		3.097	2.74117	2.92775	-0.330529	0.0252997	-0.161273	-0.155501	0.177985		0.252597	2.84733	3.28768	2.51015	-0.0845828	-0.524932	0.633546	1.64004		2.13231	3.17767	2.57531	-0.871094	-1.91645	-1.31409	-1.36721	0.5247		0	1.08511	1.05134	2.90188	1.81677	1.85053	2.18973	0.616972		-0.155501	0.633546	-1.36721	2.18973	0.239023	0.411257
CCAGGCTTGTTTCTCAATTAA	1700012B09Rik	TRCN0000182968	1.84565	1.8933	2.32556	2.5218		1.46431	1.45678	1.62703	0.381344	0.388872	0.218626	0.329614	0.096192		1.33959	1.67477	0.417979	0.553706	0.218533	1.47532	0.749186	0.650798		0.818117	0.646999	0.439997	1.50744	1.67856	1.88557	1.69052	0.189344		0.468312	0.346971	0.151786	2.05349	2.17483	2.37001	2.19944	0.159692		0.329614	0.749186	1.69052	2.19944	0.5394	1.94498
GAACTTTCAATCAAGAGAGAT	1700012B09Rik	TRCN0000183343	4.72901	4.53277	4.28889	5.05898		5.23264	4.81748	4.74823	-0.503631	-0.0884703	-0.0192188	-0.203773	0.261982		4.65019	5.09626	5.0882	-0.11742	-0.563482	-0.555424	-0.412109	0.25524		4.94459	4.53972	3.91976	-0.655699	-0.25083	0.369131	-0.179133	0.516163		2.06263	5.01199	3.71478	2.99634	0.0469889	1.3442	1.46251	1.47823		-0.203773	-0.412109	-0.179133	1.46251	-0.307941	0.641688
CCCAGGCTTGTTTCTCAATTA	1700012B09Rik	TRCN0000179949	2.73168	3.29094	2.71983	2.84044		3.28802	2.82931	2.25466	-0.556341	-0.097628	0.477016	-0.0589845	0.517761		2.12689	2.73476	2.05815	1.16405	0.556184	1.23279	0.984341	0.372385		2.56326	1.70648	2.35533	0.156568	1.01335	0.364492	0.51147	0.4469		3.2001	1.43258	0.636655	-0.35966	1.40786	2.20379	1.084	1.31205		-0.0589845	0.984341	0.51147	1.084	0.462678	0.797733
CCACAGAGATGGAACTTCATT	1700012B09Rik	TRCN0000179106	3.54454	4.25362	3.99555	4.09871		4.32238	4.95677	4.57602	-0.777842	-1.41222	-1.03147	-1.07385	0.319307		4.64137	5.13591	4.47427	-0.387755	-0.882295	-0.220652	-0.496901	0.34406		4.45302	4.97133	4.83734	-0.457471	-0.975783	-0.84179	-0.758348	0.269043		3.70626	5.01805	4.37747	0.39245	-0.919347	-0.278764	-0.268554	0.655958		-1.07385	-0.496901	-0.758348	-0.268554	-0.785374	-0.513451
CTTAGCCTTGTAGATCGTTTC	1700012L04Rik	TRCN0000270446	1.77906	2.53274	3.27044	2.82643		1.50885	2.93525	3.43567	0.270206	-1.15619	-1.65661	-0.84753	0.999803		3.5218	3.01551	3.01027	-0.989064	-0.482773	-0.477531	-0.649789	0.293832		1.21856	0.0879768	3.39212	2.05188	3.18246	-0.12168	1.70422	1.67928		0.28586	0.458219	0.492412	2.54057	2.36821	2.33402	2.41426	0.11071		-0.84753	-0.649789	1.70422	2.41426	-0.74866	2.05924
GATCGTTTCCTACGAGAGGAA	1700012L04Rik	TRCN0000194644	3.55652	3.09979	3.83955	3.07781		4.17814	3.3471	4.49855	-0.621622	0.209416	-0.942024	-0.45141	0.594292		3.84744	3.39689	3.14882	-0.747651	-0.2971	-0.0490221	-0.364591	0.354171		2.39145	2.051	2.40032	1.4481	1.78855	1.43922	1.55862	0.19917		1.8489	0	1.79815	1.22892	3.07781	1.27966	1.86213	1.05312		-0.45141	-0.364591	1.55862	1.86213	-0.408001	1.71038
GTAACTCCAGAGGATGTACGT	1700012L04Rik	TRCN0000194610	2.95926	3.05088	3.31421	3.12438		2.40527	2.23281	1.98611	0.55399	0.726442	0.973147	0.751193	0.210672		1.98068	2.51175	2.5813	1.0702	0.53913	0.469578	0.692971	0.328539		0.675555	1.96067	1.57411	2.63865	1.35354	1.7401	1.91076	0.659335		0.253075	0.307896	1.17464	2.8713	2.81648	1.94974	2.54584	0.516967		0.751193	0.692971	1.91076	2.54584	0.722082	2.2283
AGCTCTTCCGCACTTTCATTC	1700012L04Rik	TRCN0000281733	3.46628	3.28037	3.61997	3.75836		2.02047	1.89052	1.18789	1.44581	1.57576	2.27839	1.76665	0.447914		0.506876	1.55506	0.116383	2.77349	1.72531	3.16399	2.55427	0.74397		2.96989	0.758443	0	0.650083	2.86153	3.61997	2.37719	1.54305		0.149999	0	1.71933	3.60836	3.75836	2.03902	3.13525	0.952315		1.76665	2.55427	2.37719	3.13525	2.16046	2.75622
CTGGTGGTACAGAACAACGAA	1700012L04Rik	TRCN0000092896	0.540005	0.28016	0.776822	0.952144		0.783272	0.706458	0.169543	-0.243267	-0.166453	0.370462	-0.0130862	0.334375		0.298212	0.362892	0.116383	-0.0180528	-0.0827321	0.163777	0.0209972	0.12781		0.376963	0.461813	0	0.399859	0.315009	0.776822	0.49723	0.245822		0.655566	0.458219	0.199029	0.296578	0.493925	0.753115	0.514539	0.228966		-0.0130862	0.0209972	0.49723	0.514539	0.00395551	0.505885
GCTTCCTCTTAGCCTTGTAGA	1700012L04Rik	TRCN0000092897,TRCN0000173900	4.03302	3.28037	3.98746	2.90854		1.41835	1.89052	2.52853	2.61467	2.1425	1.50448	2.08722	0.557155		1.61663	0.398108	0.447906	1.66374	2.88226	2.83246	2.45949	0.689588		1.94611	0.910963	1.33552	2.04135	3.0765	2.65194	2.58993	0.520353		0	0	0	2.90854	2.90854	2.90854	2.90854	0		2.08722	2.45949	2.58993	2.90854	2.27335	2.74924
CGAGTACTTAACATCGAACAT	1700012L04Rik	TRCN0000092894,TRCN0000193869	4.41712	3.84397	3.73715	3.32211		3.82876	4.25409	3.95097	0.588359	0.163029	0.466143	0.405844	0.218982		3.3752	3.61464	3.75082	0.46877	0.229333	0.093146	0.26375	0.190163		3.95101	3.72915	2.30889	-0.213856	0.00799954	1.42826	0.407467	0.890963		2.79008	3.43589	2.3623	0.532026	-0.113776	0.959805	0.459352	0.540468		0.405844	0.26375	0.407467	0.459352	0.334797	0.433409
CTTCCTCTTAGCCTTGTAGAT	1700012L04Rik	TRCN0000173694	2.31861	2.17015	2.63262	1.27467		0.683171	0.239413	0.356797	1.63544	2.0792	1.96181	1.89215	0.229935		0	0.764782	0.224074	2.17015	1.40537	1.94608	1.84053	0.393164		0.0470894	0.323675	0	2.58553	2.30895	2.63262	2.50904	0.174872		0.28586	0	0	0.988806	1.27467	1.27467	1.17938	0.165041		1.89215	1.84053	2.50904	1.17938	1.86634	1.84421
GAGTACTTAACATCGAACATC	1700012L04Rik	TRCN0000281716	3.36094	3.92084	3.36504	3.41868		4.22562	4.2789	3.40627	-0.86468	-0.917955	-0.0453304	-0.609322	0.489157		3.50244	3.84265	3.33649	0.418394	0.0781907	0.584345	0.36031	0.258028		3.20086	5.10386	4.24733	0.164176	-1.73882	-0.882296	-0.81898	0.953076		2.82396	5.84425	2.47215	0.594721	-2.42557	0.946533	-0.294771	1.85369		-0.609322	0.36031	-0.81898	-0.294771	-0.124506	-0.556875
GCAAAGGCGAAGAAGACAGAA	1700012L04Rik	TRCN0000092829	3.59961	3.64413	3.84851	2.80515		4.62519	4.12571	4.86086	-1.02558	-0.526101	-1.26125	-0.937645	0.375382		4.1906	4.13913	4.53653	-0.546471	-0.495003	-0.8924	-0.644625	0.216117		5.42082	5.34165	4.40355	-1.57231	-1.49315	-0.555046	-1.20683	0.565852		5.30226	3.17324	6.39968	-2.49712	-0.368088	-3.59453	-2.15325	1.64048		-0.937645	-0.644625	-1.20683	-2.15325	-0.791135	-1.68004
AGCTCCGCCAACTCTTCAAAC	1700012L04Rik	TRCN0000281717	2.31861	1.71641	0.751575	1.58879		2.03069	1.45678	1.59761	0.287919	0.861829	0.721004	0.623584	0.299101		1.31761	0.652603	0.15318	0.3988	1.06381	1.56323	1.00861	0.584174		0.0470894	3.82188	1.65058	0.704486	-3.0703	-0.899009	-1.08827	1.8945		1.38744	0.307896	0.88797	0.201355	1.28089	0.700821	0.72769	0.540272		0.623584	1.00861	-1.08827	0.72769	0.816098	-0.180292
CCACAAACTATGGACTATTAG	1700012P22Rik	TRCN0000346742	2.56776	2.53274	3.0186	3.28159		2.9214	2.43897	1.58267	-0.353633	0.128791	0.985096	0.253418	0.67801		1.9946	2.59757	2.8955	0.538136	-0.0648378	-0.362768	0.0368435	0.458979		1.37438	2.23568	1.13716	1.64422	0.782923	1.88144	1.43619	0.578049		0.253075	0.0482165	1.81341	3.02852	3.23338	1.46818	2.57669	0.965449		0.253418	0.0368435	1.43619	2.57669	0.145131	2.00644
TCCACTTGCAGTCTGGTCAGA	1700012P22Rik	TRCN0000346679	2.75958	2.02576	2.47187	0.570155		2.70236	2.36507	3.15681	0.0572196	0.394509	-0.397232	0.0181656	0.397313		2.73638	2.05172	2.67917	-0.710623	-0.0259679	-0.653415	-0.463335	0.37985		1.3179	0.861893	0.175905	1.15397	1.60998	2.29596	1.68664	0.574844		0.0389869	2.37303	1.97142	0.531168	-1.80287	-1.40126	-0.890988	1.24789		0.0181656	-0.463335	1.68664	-0.890988	-0.222585	0.397825
TAGCCTGAAAGAGAGCATTTA	1700012P22Rik	TRCN0000346739	2.58346	1.92078	2.64639	3.18605		0.0410203	0	1.33777	2.54244	2.58346	1.24569	2.12386	0.760795		0.0541816	0.62314	0.324282	1.8666	1.29764	1.5965	1.58691	0.2846		0	2.27369	0	2.64639	0.372695	2.64639	1.88849	1.31272		0.928988	0	0	2.25706	3.18605	3.18605	2.87638	0.536351		2.12386	1.58691	1.88849	2.87638	1.85539	2.38244
ACTTCGTTTCTAGGTGGTATT	1700012P22Rik	TRCN0000346680	3.95974	3.37282	3.44202	2.90854		2.64365	2.76052	1.4241	1.3161	1.19922	2.53564	1.68365	0.740152		1.81796	1.68905	1.88301	1.55486	1.68376	1.48981	1.57614	0.0987139		0.871418	1.889	3.25677	2.5706	1.55302	0.185247	1.43629	1.19695		1.29383	0	0.0523899	1.61471	2.90854	2.85615	2.4598	0.732338		1.68365	1.57614	1.43629	2.4598	1.6299	1.94805
CACTACAACAGGCACAATTAT	1700012P22Rik	TRCN0000346741	0	0	0	0		0	0.163939	0	0	-0.163939	0	-0.0546462	0.09465		0	0	0	0	0	0	0	0		0.48351	0	0	-0.48351	0	0	-0.16117	0.279155		0	0	0	0	0	0	0	0		-0.0546462	0	-0.16117	0	-0.0273231	-0.080585
CTTCTAAGAAATCGCTGTATA	1700013F07Rik	TRCN0000341395	0.95634	1.65228	2.49487	2.36581		1.78722	1.50345	2.28267	-0.830883	-0.547115	-1.32633	-0.901441	0.394368		1.4036	2.49559	1.45222	0.248676	-0.843309	0.20006	-0.131524	0.616903		0.41336	1.13402	3.36514	2.08151	1.36086	-0.870265	0.857368	1.53895		0	0.140069	0.414495	2.36581	2.22574	1.95132	2.18096	0.210846		-0.901441	-0.131524	0.857368	2.18096	-0.516483	1.51916
CCTTACGCGACGAAGACAAAC	1700013F07Rik	TRCN0000341332	1.5426	1.61911	1.33106	2.79798		1.06761	3.31693	4.2494	0.474985	-1.77433	-2.7068	-1.33538	1.63568		1.05072	0.652603	2.24872	0.56839	0.966504	-0.629612	0.301761	0.830792		3.24697	0.461813	3.1449	-1.91591	0.869247	-1.81384	-0.953499	1.57937		0	0	2.58315	2.79798	2.79798	0.21483	1.93693	1.49138		-1.33538	0.301761	-0.953499	1.93693	-0.516812	0.491716
AGGGAACCAAGATCCAGTTTC	1700013F07Rik	TRCN0000352592	0.133933	0.0995552	0.801635	0.570155		0.157516	0.444693	0.0442899	-0.0235827	-0.31076	0.0896429	-0.0815667	0.206403		0	0	0.717302	0.0995552	0.0995552	-0.617747	-0.139545	0.414134		0	0.249307	0	0.801635	0.552329	0.801635	0.718533	0.143937		0	0	0	0.570155	0.570155	0.570155	0.570155	0		-0.0815667	-0.139545	0.718533	0.570155	-0.110556	0.644344
TCCGCTTAGCAACCTTGTATA	1700013F07Rik	TRCN0000341396	2.36475	2.49667	2.73279	2.44132		2.33278	1.71655	0.671143	0.0319705	0.648207	1.69361	0.791263	0.840007		1.73746	0.432486	1.04556	0.75921	2.06418	1.4511	1.42483	0.652882		1.4464	1.73401	1.96999	1.28638	0.998777	0.762798	1.01599	0.262216		0.185182	0.493474	0.636655	2.25614	1.94785	1.80467	2.00288	0.230713		0.791263	1.42483	1.01599	2.00288	1.10805	1.50943
CAGGAGACCATTGAGGATATC	1700013F07Rik	TRCN0000341390	0.133933	0.0995552	0	0.142558		0.0410203	0.124667	0.0442899	0.0929125	0.00926567	0.0896429	0.0639404	0.0473779		0.0541816	0	0.0398466	0.0453735	0.0995552	0.0597085	0.0682124	0.028074		0	0	0	0	0	0	0	0		0	0	0	0.142558	0.142558	0.142558	0.142558	0		0.0639404	0.0682124	0	0.142558	0.0660764	0.071279
CTAACAGCCAGACTTTCAATG	1700013G24Rik	TRCN0000264303	2.83364	2.63583	3.34407	3.3712		1.35469	1.5925	2.93952	1.47895	1.24113	-0.105881	0.8714	0.854662		1.31761	1.16307	2.81741	1.31822	1.47276	-0.181581	0.869802	0.913796		0	1.04889	0.0460276	3.34407	2.29519	3.29805	2.9791	0.592736		0.0389869	0.0482165	0.332129	3.33222	3.32299	3.03908	3.23143	0.166645		0.8714	0.869802	2.9791	3.23143	0.870601	3.10526
GTTCCACTGGTTTGAACTATC	1700013G24Rik	TRCN0000345366	2.51144	2.93437	2.94255	3.14146		3.25353	3.03394	2.69753	-0.742089	-0.522491	-0.186082	-0.483554	0.280041		3.90386	1.7853	2.21431	-0.969496	1.14907	0.720058	0.299877	1.12004		1.68838	1.52925	1.31686	1.25417	1.4133	1.62568	1.43105	0.186394		1.9341	3.46726	2.12608	1.20736	-0.325797	1.01538	0.632315	0.835284		-0.483554	0.299877	1.43105	0.632315	-0.0918385	1.03168
TCCTAGACCAGCTCATCAAAG	1700013G24Rik	TRCN0000264305	2.59124	2.82225	1.76874	3.19698		1.46431	2.22355	2.14708	1.12693	0.367691	0.444163	0.646263	0.418026		0.106402	0.362892	0.0398466	2.71585	2.45936	2.78241	2.65254	0.170575		0.0470894	1.09208	0	1.72165	0.67666	1.76874	1.38902	0.617369		0	0	0.88797	3.19698	3.19698	2.30901	2.90099	0.51267		0.646263	2.65254	1.38902	2.90099	1.6494	2.145
CTGGACCCAGTATCCCAATAT	1700013G24Rik	TRCN0000264304	0.571826	0.362635	0.471343	0.230327		0.518654	0.163939	0.856438	0.0531728	0.407888	-0.284612	0.0588163	0.346284		0.426994	0.0451324	0	-0.0643593	0.317503	0.362635	0.205259	0.234585		0.221434	0.170896	0	0.249909	0.300447	0.471343	0.340566	0.116041		0.0389869	0	0.102944	0.19134	0.230327	0.127383	0.183017	0.0519742		0.0588163	0.205259	0.340566	0.183017	0.132038	0.261792
TTCCAAGCGGCTCCGAGTTAA	1700013G24Rik	TRCN0000282986	1.57436	1.86528	1.66438	0.272288		0.657021	1.15931	0.699116	0.917344	0.415058	0.875249	0.735884	0.278639		0.298212	1.12153	1.19422	1.56707	0.743749	0.671064	0.993961	0.497656		1.42873	1.67841	0.175905	0.235652	-0.0140267	1.48848	0.570034	0.805133		3.19148	0.626462	0	-2.91919	-0.354174	0.272288	-1.00036	1.69102		0.735884	0.993961	0.570034	-1.00036	0.864922	-0.215162
CCCTTCAAACCACCTAAGGTT	1700013N18Rik	TRCN0000039471	3.19717	2.71645	2.93135	3.61489		3.3868	3.67053	2.94537	-0.189626	-0.473363	0.251802	-0.137062	0.365429		2.1142	2.89125	2.01881	0.602259	-0.174795	0.697645	0.375036	0.47855		2.05379	1.39772	1.90903	0.877561	1.53363	1.02232	1.14451	0.344679		0.630258	2.37303	3.51925	2.98464	1.24187	0.0956398	1.44071	1.45473		-0.137062	0.375036	1.14451	1.44071	0.118987	1.29261
CGGCAGTATTTGTCTTGATAT	1700013N18Rik	TRCN0000098506	1.84565	1.40228	1.94614	1.07577		0.547409	1.21646	0.553491	1.29824	0.629194	1.29216	1.0732	0.384533		0.788376	1.28096	1.48145	0.613904	0.121321	-0.0791687	0.218685	0.356647		0.0470894	0.910963	1.07192	1.89905	1.03517	0.874221	1.26948	0.551128		0.0389869	0	0.414495	1.03678	1.07577	0.661275	0.924609	0.228886		1.0732	0.218685	1.26948	0.924609	0.645943	1.09704
TCACTGGCAAGCTACAATCAT	1700013N18Rik	TRCN0000098509	2.36475	1.61911	1.67785	2.53047		2.45164	1.75563	0.642617	-0.0868875	0.609121	1.72214	0.748123	0.912488		0.881226	2.74847	1.065	0.737881	-1.12936	0.554102	0.0542085	1.02911		1.19784	1.36287	3.22711	0.480009	0.314978	-1.54926	-0.251426	1.12699		0	2.4104	1.02537	2.53047	0.12007	1.5051	1.38521	1.20966		0.748123	0.0542085	-0.251426	1.38521	0.401166	0.566893
GCACTAACTATTTCCAAAGTA	1700013N18Rik	TRCN0000098507	3.70021	3.47831	3.84553	3.62707		2.21225	2.87144	2.04179	1.48796	0.828778	1.65843	1.32506	0.438159		1.9946	2.6999	1.98859	1.48371	0.778413	1.48973	1.25062	0.408952		3.41345	3.26519	2.55953	0.432079	0.580335	1.286	0.766136	0.456273		3.63488	1.31926	1.41368	-0.00781149	2.30781	2.21339	1.50446	1.31052		1.32506	1.25062	0.766136	1.50446	1.28784	1.1353
CCTAGAACTTAAATGGACATT	1700013N18Rik	TRCN0000098505	3.693	2.66862	3.4655	3.13579		3.80514	2.39013	2.91587	-0.112143	1.30287	0.777123	0.65595	0.715246		4.79047	3.161	4.12422	-2.12184	-0.492371	-1.45559	-1.3566	0.819234		6.35793	3.99685	3.25677	-2.89243	-0.531347	0.208729	-1.07168	1.61965		2.08143	5.46474	1.70304	1.05436	-2.32895	1.43275	0.0527198	2.07124		0.65595	-1.3566	-1.07168	0.0527198	-0.350326	-0.509482
GTTAACAGTAACGGCAGTATT	1700013N18Rik	TRCN0000098508	2.82706	3.18159	2.29093	2.64669		2.72141	3.13127	2.96278	0.105646	-0.304205	-0.135721	-0.111427	0.206003		3.45792	3.77057	3.21122	-0.276328	-0.588985	-0.0296307	-0.298315	0.280325		4.29374	4.40918	3.6781	-2.00281	-2.11825	-1.38717	-1.83608	0.393027		6.34153	4.67072	2.19761	-3.69485	-2.02403	0.449076	-1.7566	2.08487		-0.111427	-0.298315	-1.83608	-1.7566	-0.204871	-1.79634
AGGAGCTATCTTCGGATAGTT	1700014N06Rik	TRCN0000023272	4.52265	4.52832	4.5139	4.60695		4.83216	4.37825	4.99525	-0.309513	0.144403	-0.472604	-0.212571	0.319723		3.66361	3.95333	4.58951	0.864704	0.574984	-0.0611929	0.459498	0.473628		2.25772	1.43174	3.31433	2.25618	3.08216	1.19957	2.1793	0.943644		2.17191	2.41959	2.05082	2.43505	2.18736	2.55613	2.39285	0.187973		-0.212571	0.459498	2.1793	2.39285	0.123463	2.28607
CATTCGTGAAGGATATGTTTG	1700014N06Rik	TRCN0000363004	1.76536	2.00022	2.03252	2.31653		2.90482	2.67475	2.75862	-1.13946	-0.909388	-0.993253	-1.01403	0.116436		1.44475	2.30464	3.38371	0.555473	-0.304425	-1.38349	-0.37748	0.971543		3.67188	2.56182	2.78662	-1.63935	-0.5293	-0.754101	-0.974252	0.586861		0	2.05682	0	2.31653	0.259707	2.31653	1.63092	1.18751		-1.01403	-0.37748	-0.974252	1.63092	-0.695757	0.328335
CTGGATTCATTCGTGAAGGAT	1700014N06Rik	TRCN0000023271	1.15848	1.19281	1.16888	1.5381		2.08073	1.86691	1.68413	-0.922248	-0.708432	-0.525646	-0.718775	0.198503		1.98068	1.47486	2.6665	-0.78787	-0.282048	-1.47369	-0.847869	0.598082		1.54811	1.73401	2.09567	-0.379237	-0.56513	-0.926793	-0.62372	0.27844		0.57827	1.08511	1.28822	0.959827	0.452989	0.249873	0.554229	0.365644		-0.718775	-0.847869	-0.62372	0.554229	-0.783322	-0.0347454
AGAGAGATCCAGACCGCTATT	1700014N06Rik	TRCN0000363006	2.68879	3.1471	3.10087	2.88169		1.14491	0	0	1.54388	2.68879	2.68879	2.30715	0.661016		0	1.12153	1.34497	3.1471	2.02557	1.80213	2.32493	0.72073		0.179783	0	0	2.92109	3.10087	3.10087	3.04094	0.103798		0	0.657878	0	2.88169	2.22381	2.88169	2.6624	0.379826		2.30715	2.32493	3.04094	2.6624	2.31604	2.85167
CAAGCCAGAAACTCTACTATC	1700014N06Rik	TRCN0000363074	1.2982	1.00015	1.39768	0.698809		0	0.0842967	0	1.2982	1.2139	1.2982	1.2701	0.0486687		0.582565	0	0	0.417581	1.00015	1.00015	0.805958	0.336344		0.0470894	0	0	1.35059	1.39768	1.39768	1.38198	0.0271871		0	0	0.0523899	0.698809	0.698809	0.646419	0.681345	0.0302473		1.2701	0.805958	1.38198	0.681345	1.03803	1.03166
ATGGCGATGGTCCGGTATATC	1700014N06Rik	TRCN0000363003	0.540005	0.44065	0.561271	0.428895		1.00679	0.927943	0	-0.46679	-0.387938	0.540005	-0.104908	0.5599		0	0.212743	0.789202	0.44065	0.227907	-0.348552	0.106668	0.408331		1.37438	0.811095	0.69238	-0.813109	-0.249824	-0.13111	-0.398014	0.36435		0	0	1.26621	0.428895	0.428895	-0.837316	0.00682459	0.731047		-0.104908	0.106668	-0.398014	0.00682459	0.000880097	-0.195595
CCTGTGTGAACTGTACTCAAT	1700016D06Rik	TRCN0000179840	2.80715	3.00026	3.05	3.73604		3.03743	3.62553	2.48099	-0.230288	-0.818381	0.326158	-0.240837	0.572342		3.212	2.05172	2.54022	-0.21174	0.948532	0.460035	0.398943	0.582544		1.06687	1.91328	2.58314	1.98313	1.13672	0.466866	1.19557	0.759844		1.08616	1.23844	2.11381	2.64989	2.4976	1.62223	2.25657	0.554605		-0.240837	0.398943	1.19557	2.25657	0.0790527	1.72607
GCTTCCATTATTTCAGCTTAA	1700016D06Rik	TRCN0000183148	4.36131	4.46905	4.4368	4.62933		5.5206	4.64779	5.53288	-1.15929	-0.286484	-1.17157	-0.872449	0.507497		5.15209	4.8403	5.13033	-0.683045	-0.371251	-0.661285	-0.571861	0.174073		3.91656	4.0471	3.66341	0.52024	0.389693	0.773384	0.561105	0.195083		3.41541	3.08931	3.6819	1.21392	1.54002	0.947423	1.23379	0.296796		-0.872449	-0.571861	0.561105	1.23379	-0.722155	0.897445
GCTTTCAGGTTCAAGTGGTAA	1700016D06Rik	TRCN0000179233	3.0124	3.7475	3.0186	3.41401		2.97	2.77327	3.72474	0.0424038	0.239131	-0.712333	-0.143599	0.502264		3.51216	3.32094	2.36308	0.235349	0.426567	1.38443	0.682114	0.615689		2.96989	2.51498	0.507351	0.0487116	0.50362	2.51125	1.02119	1.31032		1.22787	2.63223	2.66114	2.18613	0.781774	0.752869	1.24026	0.819279		-0.143599	0.682114	1.02119	1.24026	0.269257	1.13073
GCTACAGTGTTTGATGAAATT	1700016D06Rik	TRCN0000183524	5.32578	4.78164	5.34942	3.96437		4.92274	4.74649	4.66203	0.403035	0.579286	0.663751	0.54869	0.133024		4.62804	5.16559	5.49976	0.153604	-0.383953	-0.718114	-0.316155	0.439796		4.03224	4.10096	5.70835	1.31717	1.24846	-0.35893	0.735566	0.948484		3.60272	5.45247	3.75485	0.361657	-1.4881	0.209519	-0.305641	1.02686		0.54869	-0.316155	0.735566	-0.305641	0.116268	0.214963
GCAAAGTAGAAGCAGTCAACT	1700016D06Rik	TRCN0000179447	4.25751	3.37282	3.56306	3.00502		4.49654	4.18895	3.99677	-0.239026	0.0685643	0.260742	0.0300934	0.252095		4.19964	4.41749	3.59906	-0.82682	-1.04467	-0.226238	-0.699243	0.423869		4.79744	6.418	3.74241	-1.23438	-2.85494	-0.179356	-1.42289	1.34772		4.00837	3.35194	3.15008	-1.00334	-0.346913	-0.145053	-0.498436	0.448759		0.0300934	-0.699243	-1.42289	-0.498436	-0.334575	-0.960664
TTGAAGGGCAGCTGTTATAAA	1700016H13Rik	TRCN0000346645	3.08035	3.28037	1.76874	2.63065		0.830833	1.79369	2.03082	2.24952	1.28666	1.04953	1.52857	0.635517		3.18796	2.20873	0.835218	0.092407	1.07164	2.44515	1.20307	1.18187		0.376963	0.703797	0	1.39178	1.06494	1.76874	1.40849	0.352196		0.113936	0	0.858848	2.51671	2.63065	1.7718	2.30638	0.466457		1.52857	1.20307	1.40849	2.30638	1.36582	1.85744
ATGAAGCTCTTGGACTCTTTC	1700016H13Rik	TRCN0000346701	2.08498	3.13542	3.29686	1.95363		2.83656	1.64895	1.2075	-0.751584	0.436026	0.877481	0.187308	0.842531		1.83353	0	1.14025	1.30189	3.13542	1.99517	2.14416	0.925802		1.54811	1.09208	3.84362	1.74874	2.20478	-0.546756	1.13559	1.47469		0.379968	0	0	1.57366	1.95363	1.95363	1.82697	0.219375		0.187308	2.14416	1.13559	1.82697	1.16573	1.48128
CCAAACAGGAATGCCAGTTTC	1700016H13Rik	TRCN0000346648	3.09137	3.33246	1.83033	2.9672		3.27088	2.32232	1.77892	-0.179511	0.769051	1.31245	0.633997	0.755094		3.27038	1.93668	3.16242	0.0620782	1.39578	0.170042	0.542634	0.740817		3.02972	1.91328	1.19958	-1.1994	-0.0829561	0.630746	-0.217202	0.922427		2.07206	5.53092	0.373899	0.895139	-2.56372	2.5933	0.308241	2.62813		0.633997	0.542634	-0.217202	0.308241	0.588316	0.0455195
GATATAGCATCGGCCATAAAC	1700017D01Rik	TRCN0000347196	2.95926	2.61915	2.97563	4.48735		4.10023	3.31257	4.15914	-1.14097	-0.353316	-1.19988	-0.898056	0.472678		3.212	4.74436	3.28768	-0.592841	-2.1252	-0.668527	-1.12886	0.86369		3.32546	2.25481	2.73838	-0.349828	0.720824	0.237255	0.20275	0.53616		1.08616	3.90055	6.8976	3.4012	0.586802	-2.41024	0.525918	2.9062		-0.898056	-1.12886	0.20275	0.525918	-1.01346	0.364334
CAGTATAACTCAGGGTATTTC	1700017D01Rik	TRCN0000347266	3.29574	3.20413	3.89825	2.53047		2.01018	3.67053	3.28231	1.28556	-0.374793	0.0134302	0.308067	0.868506		2.04898	3.2359	3.04495	1.15515	-0.0317683	0.159184	0.427522	0.637337		2.77387	0.861893	0.69238	1.12438	3.03635	3.20586	2.45553	1.15593		2.24875	4.25659	1.26621	0.281715	-1.72613	1.26426	-0.060052	1.52421		0.308067	0.427522	2.45553	-0.060052	0.367794	1.19774
AGTATCTTCGTGGCTATATTT	1700017D01Rik	TRCN0000347193	2.14967	2.74748	2.59763	3.7912		0.459364	0	0	1.6903	2.14967	2.14967	1.99655	0.265214		0	0	0	2.74748	2.74748	2.74748	2.74748	0		0	0.0879768	0	2.59763	2.50965	2.59763	2.5683	0.0507934		0	0	0	3.7912	3.7912	3.7912	3.7912	0		1.99655	2.74748	2.5683	3.7912	2.37201	3.17975
CTGAATACATTTGGTCAAATA	1700017D01Rik	TRCN0000347269	1.97027	2.79281	1.52233	2.70912		1.30504	3.00178	1.47353	0.665237	-1.03151	0.496745	0.043491	0.934782		2.32721	1.40733	1.65826	0.465596	1.38548	1.13455	0.99521	0.47551		2.57936	1.32716	1.25942	-1.05703	0.195171	0.262917	-0.199648	0.743288		0.524338	0	1.19808	2.18478	2.70912	1.51104	2.13498	0.600592		0.043491	0.99521	-0.199648	2.13498	0.51935	0.967667
CAAATAATGCTTGGCCTAATT	1700017D01Rik	TRCN0000347268	3.74974	3.47831	2.48725	4.09579		3.35868	3.29499	3.35444	0.391063	0.454752	0.395299	0.413705	0.0356112		4.13197	2.92786	3.66424	-0.653657	0.550455	-0.185929	-0.0963771	0.607031		5.87522	5.21305	2.11739	-3.38797	-2.7258	0.369856	-1.91464	2.00594		1.72288	3.0002	5.92246	2.37291	1.09559	-1.82667	0.547279	2.15281		0.413705	-0.0963771	-1.91464	0.547279	0.158664	-0.68368
GAAGGGTTCGTTTCAGACCTT	1700018B08Rik	TRCN0000184499	4.23781	3.70861	4.19133	4.46038		4.2433	3.84679	4.29135	-0.00549241	0.391018	-0.0535404	0.110662	0.243981		2.84794	3.2359	2.82883	0.860671	0.472714	0.879783	0.737722	0.229703		3.54229	2.65118	1.27882	0.649041	1.54015	2.91251	1.70057	1.14023		4.82324	2.54251	3.10118	-0.362856	1.91787	1.35921	0.971408	1.18879		0.110662	0.737722	1.70057	0.971408	0.424192	1.33599
GCCATCATAGCCATTTGTCAT	1700018B08Rik	TRCN0000180490	5.34317	4.86888	5.08841	5.37162		5.98997	6.04076	6.23321	-0.646798	-0.697591	-0.890044	-0.744811	0.128314		5.18889	5.8661	5.85143	-0.320002	-0.997215	-0.982544	-0.766587	0.386824		4.35116	5.4179	3.35146	0.737248	-0.329491	1.73695	0.714903	1.0334		4.63884	8.59128	5.48259	0.732776	-3.21966	-0.110967	-0.865951	2.08157		-0.744811	-0.766587	0.714903	-0.865951	-0.755699	-0.0755244
GTCTTTAGCTACTGTCAAGAT	1700018B08Rik	TRCN0000179595	4.47296	4.50126	4.32998	3.93855		2.28236	2.24202	1.56757	2.1906	2.23094	2.90538	2.44231	0.401543		3.44276	3.17121	1.08419	1.0585	1.33005	3.41708	1.93521	1.2905		2.70213	1.64979	1.13716	1.62785	2.68019	3.19282	2.50029	0.797845		2.14536	0.183891	0.289112	1.79319	3.75465	3.64943	3.06576	1.10333		2.44231	1.93521	2.50029	3.06576	2.18876	2.78302
CTCGAAGATGATGCGGTGTTA	1700018B08Rik	TRCN0000184682	1.15848	1.28028	0.776822	1.02758		0.899358	0.706458	1.39019	0.259124	0.452024	-0.231705	0.159814	0.352516		0.996403	0.989222	1.10312	0.283877	0.291058	0.177161	0.250699	0.0637866		1.27898	2.051	0.507351	-0.502157	-1.27418	0.269471	-0.502287	0.771824		0.185182	0.183891	2.15032	0.842401	0.843692	-1.12274	0.187785	1.13495		0.159814	0.250699	-0.502287	0.187785	0.205257	-0.157251
GCAGACGTACAAGTCTCACAA	1700018B24Rik	TRCN0000095635	4.64736	4.53722	4.84904	4.14461		4.84235	5.35485	4.71436	-0.194992	-0.707491	-0.0670032	-0.323162	0.338935		5.43718	5.17705	4.38427	-0.89996	-0.639824	0.152949	-0.462279	0.548449		3.5828	3.86609	3.6781	1.26623	0.982942	1.17094	1.14004	0.144151		3.34326	3.43135	5.54563	0.801352	0.713265	-1.40101	0.0378678	1.24689		-0.323162	-0.462279	1.14004	0.0378678	-0.39272	0.588952
GATGTACGAAGAGCACCTGAA	1700018B24Rik	TRCN0000095637	2.60669	3.13542	2.90869	3.45557		2.16665	2.30486	2.05267	0.440041	0.301829	0.554019	0.431963	0.126289		2.31617	1.67477	1.49585	0.819251	1.46065	1.63957	1.30649	0.431343		0.301294	2.19663	2.12813	2.60739	0.712055	0.780558	1.36667	1.07504		2.15426	1.85476	0.829125	1.30131	1.60081	2.62645	1.84286	0.694935		0.431963	1.30649	1.36667	1.84286	0.869228	1.60476
CCGGAGCAAGTCCATCACCTA	1700018B24Rik	TRCN0000095638	2.39175	2.76275	2.72632	1.8466		2.63697	1.85496	1.8049	-0.245225	0.536784	0.586853	0.292804	0.466619		2.16433	1.52351	1.21177	0.598425	1.23924	1.55098	1.12955	0.48566		1.78877	0.646999	2.34616	0.937549	2.07932	0.380156	1.13234	0.866169		0.468312	0	0.998915	1.37829	1.8466	0.847685	1.35752	0.499781		0.292804	1.12955	1.13234	1.35752	0.711177	1.24493
GTTTGAGTTTATCGACCGGAT	1700018B24Rik	TRCN0000095636	3.72872	2.89334	3.64075	2.63869		3.81108	3.11131	4.01079	-0.0823574	0.617411	-0.282065	0.0843294	0.472338		3.27038	2.41191	3.00525	-0.377044	0.481426	-0.111907	-0.00250842	0.439566		2.7878	2.72163	4.11863	0.852947	0.919113	-0.477882	0.431393	0.78815		5.34567	3.48488	2.719	-2.70698	-0.846194	-0.0803158	-1.21116	1.35083		0.0843294	-0.00250842	0.431393	-1.21116	0.0409105	-0.389886
GTTATTGAGAGCGCCAAGGTT	1700018C11Rik	TRCN0000201693	2.95323	2.93437	2.93696	3.71337		3.23155	1.32439	1.76575	-0.278324	1.62884	1.18748	0.845997	0.998385		1.75392	3.31173	1.24624	1.18045	-0.377367	1.68813	0.830402	1.07632		0.897348	1.98378	2.4863	2.03961	0.953175	0.450658	1.14782	0.812162		0.604498	0.183891	1.35232	3.10888	3.52948	2.36106	2.99981	0.591799		0.845997	0.830402	1.14782	2.99981	0.8382	2.07381
GCATACAATATACAAACAGGA	1700018C11Rik	TRCN0000191735	4.4302	4.20415	4.00359	3.78759		4.06337	4.75937	3.46447	0.366829	-0.329173	0.965724	0.33446	0.648055		3.7023	3.40989	3.46279	0.501849	0.794256	0.741361	0.679155	0.155813		2.95144	3.72915	3.08553	1.05215	0.274436	0.918058	0.748214	0.415745		3.75683	1.45063	3.75485	0.0307564	2.33695	0.0327324	0.800147	1.33091		0.33446	0.679155	0.748214	0.800147	0.506807	0.774181
CTAAACCGCTACTACCAGGAA	1700018C11Rik	TRCN0000190897	4.23035	3.57662	3.78771	2.81228		4.63359	4.43954	3.51256	-0.403241	-0.209186	0.717797	0.0351236	0.599121		4.89808	3.5179	3.31229	-1.32146	0.0587215	0.264323	-0.332805	0.86235		3.33498	3.21723	5.1859	0.452726	0.570481	-1.39819	-0.124995	1.10419		3.52245	3.09506	2.23209	-0.710179	-0.282783	0.580188	-0.137591	0.657322		0.0351236	-0.332805	-0.124995	-0.137591	-0.148841	-0.131293
CAATTCGCTGAAGACTGAGAA	1700018C11Rik	TRCN0000201003	3.66745	4.06328	3.4771	2.27585		5.04247	4.00114	4.46228	-1.37502	-0.333684	-0.794826	-0.834509	0.5218		5.47367	5.46656	5.79652	-1.41039	-1.40327	-1.73323	-1.51563	0.188481		4.62776	3.93295	4.51821	-1.15066	-0.455851	-1.0411	-0.882537	0.373558		6.12873	2.9817	2.92973	-3.85288	-0.705841	-0.653872	-1.73753	1.83213		-0.834509	-1.51563	-0.882537	-1.73753	-1.17507	-1.31003
CTGACTGCATACAATATACAA	1700018C11Rik	TRCN0000191281	2.91031	3.44084	2.32556	3.16949		0.899358	1.9591	0.952531	2.01096	0.951212	1.95778	1.63998	0.597086		1.31761	1.31821	0.0398466	2.12323	2.12263	3.40099	2.54895	0.73789		0.301294	2.31073	0.907117	2.02427	0.014829	1.41845	1.15251	1.03078		2.10918	1.68216	1.26621	1.06031	1.48733	1.90328	1.48364	0.421494		1.63998	2.54895	1.15251	1.48364	2.09447	1.31808
CCATTTATGTACAGGTGTTCT	1700018L24Rik	TRCN0000176723	4.88913	4.58094	5.11092	4.83581		4.55258	4.60206	5.32532	0.336554	0.287074	-0.436184	0.0624812	0.432565		5.17061	4.09152	4.45782	-0.589665	0.489426	0.123125	0.00762899	0.548739		4.25165	5.14032	4.12668	0.859271	-0.0294028	0.984235	0.604701	0.552693		3.40425	1.86825	0.798778	1.43155	2.96755	4.03703	2.81205	1.30968		0.0624812	0.00762899	0.604701	2.81205	0.0350551	1.70837
GATGAAATCCAAACCAGCGAA	1700018L24Rik	TRCN0000178534	4.79958	4.80026	5.47717	5.46504		5.14598	5.80493	5.44372	-0.346404	-1.00535	-0.644138	-0.665296	0.329981		4.53584	4.3695	4.68527	0.264417	0.430755	0.11499	0.270054	0.157958		4.22885	5.92445	4.67289	1.24831	-0.447281	0.804276	0.535103	0.879261		4.57893	4.60776	4.69424	0.886114	0.857278	0.770805	0.838066	0.0600075		-0.665296	0.270054	0.535103	0.838066	-0.197621	0.686584
GCCGTCATTTATAGGGTTATA	1700018L24Rik	TRCN0000176820	5.05592	4.79284	5.33355	4.39066		4.79217	5.16587	5.74733	0.26375	-0.109949	-0.691402	-0.1792	0.481327		4.98433	4.69565	5.618	-0.191488	0.0971879	-0.825158	-0.306486	0.471804		4.93523	4.57059	4.88402	0.398321	0.762964	0.449535	0.53694	0.197411		1.5311	6.40673	6.52605	2.85956	-2.01607	-2.13539	-0.430634	2.85002		-0.1792	-0.306486	0.53694	-0.430634	-0.242843	0.0531528
CCACATCTCCTGAAGAAGTTT	1700018L24Rik	TRCN0000177653	4.98088	5.02265	5.14888	5.41558		5.72243	5.38321	5.97818	-0.741556	-0.402331	-0.997302	-0.71373	0.29846		5.5628	6.0682	6.59406	-0.540153	-1.04555	-1.57141	-1.05237	0.515663		6.05372	5.6103	6.24823	-0.904834	-0.461422	-1.09935	-0.821868	0.326955		5.45332	5.97939	6.1118	-0.0377349	-0.56381	-0.696214	-0.432586	0.348301		-0.71373	-1.05237	-0.821868	-0.432586	-0.88305	-0.627227
GAGAAAGCTGTTCCCATTTAT	1700018L24Rik	TRCN0000177246	5.90652	5.60444	5.82076	5.34114		5.09211	5.34634	5.51627	0.814412	0.56018	0.390253	0.588282	0.213471		5.75704	5.73967	6.65306	-0.152593	-0.13523	-1.04862	-0.445481	0.522406		7.54227	5.1983	6.2513	-1.72151	0.622458	-0.430546	-0.509866	1.17399		6.4026	5.45471	7.18033	-1.06146	-0.113568	-1.83919	-1.00474	0.864207		0.588282	-0.445481	-0.509866	-1.00474	0.0714003	-0.757302
CAGATGAAGAGAGATTTAATA	1700019A02Rik	TRCN0000341182	1.69486	1.74744	2.85042	3.4046		1.38687	2.05622	0.83138	0.307993	-0.361363	0.863482	0.270037	0.613304		0.756049	0.28977	0.447906	0.99139	1.45767	1.29953	1.24953	0.237127		1.25912	1.39772	1.98188	1.5913	1.45271	0.868546	1.30419	0.383587		0	2.75352	1.17464	3.4046	0.65108	2.22996	2.09522	1.3817		0.270037	1.24953	1.30419	2.09522	0.759784	1.6997
GTTAAGAAACAGGCAAGAAAT	1700019A02Rik	TRCN0000341181	2.29973	1.44076	1.49216	1.46761		0.783272	1.0998	2.53631	1.51646	1.19993	-0.236577	0.826606	0.934246		0.426994	2.23818	2.1611	1.01376	-0.797422	-0.720344	-0.168001	1.02416		1.15549	1.43174	0.0460276	0.336672	0.060422	1.44614	0.61441	0.73342		0.219528	0	0.703706	1.24808	1.46761	0.763903	1.15986	0.360051		0.826606	-0.168001	0.61441	1.15986	0.329302	0.887137
CTACCCGGATGGAGATCATAG	1700019A02Rik	TRCN0000341180	0	0	0.0833101	0.0491013		0.265303	0	0	-0.265303	0	0	-0.0884342	0.153173		0	0.0451324	0	0	-0.0451324	0	-0.0150441	0.0260572		0.0470894	0	0.175905	0.0362207	0.0833101	-0.0925953	0.00897852	0.091062		0.0389869	0.0482165	0	0.0101144	0.000884761	0.0491013	0.0200335	0.025593		-0.0884342	-0.0150441	0.00897852	0.0200335	-0.0517392	0.014506
GTGAATGGACTGAACATATTT	1700019A02Rik	TRCN0000352477	2.01726	2.25897	2.51752	0.570155		0.807248	0.624369	0.0872605	1.21001	1.39289	1.93	1.51096	0.374235		1.86419	0	0	0.394778	2.25897	2.25897	1.63757	1.07629		0	0.394397	0	2.51752	2.12312	2.51752	2.38605	0.227705		0	0	0	0.570155	0.570155	0.570155	0.570155	0		1.51096	1.63757	2.38605	0.570155	1.57427	1.4781
CTCAGGAGTATTGCATCAATG	1700019A02Rik	TRCN0000341183	1.04969	1.58516	1.02879	0.536115		0.830833	2.47845	1.56757	0.21886	-1.42876	-0.51788	-0.575925	0.82534		0.0541816	0.562346	0.692516	1.53098	1.02281	0.892641	1.14881	0.337305		1.06687	0.587872	2.25112	-0.0380872	0.440913	-1.22233	-0.273169	0.856181		0	0	0.373899	0.536115	0.536115	0.162216	0.411482	0.215871		-0.575925	1.14881	-0.273169	0.411482	0.286442	0.0691564
CTCTTTGACCGGGATTCAATG	1700019B03Rik	TRCN0000341631	1.68034	2.09976	2.73922	3.01123		3.62801	1.67637	3.55144	-1.94767	0.00396618	-1.8711	-1.2716	1.10534		1.66966	1.74483	1.671	0.430103	0.354926	0.428759	0.404596	0.043021		2.67989	1.46498	0.830287	0.059329	1.27424	1.90893	1.08083	0.939848		0	0.688625	1.54746	3.01123	2.32261	1.46377	2.26587	0.775291		-1.2716	0.404596	1.08083	2.26587	-0.433502	1.67335
TCTGCACTTGCACGCGGATAT	1700019B03Rik	TRCN0000341630	1.55857	1.6847	1.41386	0.952144		2.45164	2.10748	1.67006	-0.893072	-0.548915	-0.111493	-0.517827	0.391716		0.156798	3.84584	0.0398466	1.5279	-2.16114	1.64485	0.337205	2.16442		0.582726	1.83916	0	0.831134	-0.425303	1.41386	0.606563	0.939922		0.949596	0	0.829125	0.00254799	0.952144	0.123019	0.359237	0.516994		-0.517827	0.337205	0.606563	0.359237	-0.0903109	0.4829
CTCCATGAGCTCAGACTATTG	1700019B03Rik	TRCN0000341560	2.24157	2.97426	2.2644	3.95152		1.46431	1.89052	2.9099	0.777257	0.351047	-0.668338	0.153322	0.742804		2.98675	2.57467	2.62125	-0.0124905	0.399589	0.353009	0.246703	0.225673		1.99496	3.96816	3.07447	0.269438	-1.70376	-0.810069	-0.748129	0.988054		2.20657	1.68216	1.26621	1.74495	2.26936	2.68531	2.2332	0.471219		0.153322	0.246703	-0.748129	2.2332	0.200012	0.742538
GATAAGACTCCGGAGTCAAAC	1700019B03Rik	TRCN0000341563	2.9411	1.23721	2.22825	4.17811		1.82294	1.70328	1.61239	1.11815	1.23782	1.32871	1.22823	0.105603		1.22617	1.37234	1.98859	0.0110387	-0.135128	-0.751379	-0.291823	0.404642		2.72403	4.89716	2.3183	-0.495777	-2.66891	-0.0900514	-1.08491	1.3867		4.46366	0.385015	0.453979	-0.285549	3.79309	3.72413	2.41056	2.33515		1.22823	-0.291823	-1.08491	2.41056	0.468201	0.662822
AGAAACTGAAGGATCACATAA	1700019B03Rik	TRCN0000341629	3.37904	4.38768	2.9919	2.84044		5.43278	4.54928	4.86858	-2.05374	-1.17024	-1.48954	-1.57117	0.447374		5.0772	4.27083	4.80572	-0.689524	0.116848	-0.418044	-0.33024	0.410294		6.3851	7.46656	6.28588	-3.39321	-4.47466	-3.29398	-3.72062	0.654902		4.26216	5.01047	6.27157	-1.42172	-2.17003	-3.43112	-2.34096	1.01555		-1.57117	-0.33024	-3.72062	-2.34096	-0.950706	-3.03079
CCCATTTCCTACCACATTGGA	1700019D03Rik	TRCN0000202008	4.37715	3.17018	4.60129	4.64737		4.69593	3.80393	3.82335	-0.318772	0.573224	0.553807	0.26942	0.509481		3.20602	3.13514	3.17141	-0.0358401	0.0350473	-0.00122965	-0.000674131	0.035447		3.62221	3.10573	3.89482	0.97908	1.49556	0.706468	1.06037	0.400777		3.81414	3.30806	2.67791	0.833231	1.33932	1.96947	1.38067	0.569245		0.26942	-0.000674131	1.06037	1.38067	0.134373	1.22052
GCAGTCAATATAGGACACCTT	1700019D03Rik	TRCN0000201396	4.79116	4.45502	4.60305	4.41662		3.97352	4.48483	4.94065	0.817637	0.306328	-0.149491	0.324825	0.483829		4.15385	3.8836	4.10321	0.301172	0.571416	0.351805	0.408131	0.143657		4.23649	4.41769	3.49111	0.366562	0.18536	1.11195	0.554623	0.491087		4.20116	3.68875	2.74311	0.215453	0.727868	1.6735	0.872275	0.739675		0.324825	0.408131	0.554623	0.872275	0.366478	0.713449
GCCAGTGAAATTGTGGAGGAT	1700019D03Rik	TRCN0000190024	0.332754	1.147	0.162071	0		0.603256	1.50345	0.0442899	-0.270502	-1.1707	0.288465	-0.384246	0.736202		1.59851	0.212743	2.33932	-0.451511	0.934259	-1.19232	-0.236525	1.07947		0	0.249307	0	0.162071	-0.0872357	0.162071	0.0789687	0.143937		0	0	0.0523899	0	0	-0.0523899	-0.0174633	0.0302473		-0.384246	-0.236525	0.0789687	-0.0174633	-0.310385	0.0307527
GAAATTGTGGAGGATGCCTTG	1700019D03Rik	TRCN0000202439	4.61336	4.12366	4.16767	3.66694		4.67653	4.93848	5.19264	-0.0631704	-0.325122	-0.579276	-0.322523	0.258063		4.60099	4.72542	5.35722	-0.477334	-0.60176	-1.23356	-0.770884	0.405489		4.716	5.20815	6.78336	-0.548333	-1.04048	-2.61569	-1.4015	1.07993		5.15476	4.47736	4.3826	-1.48782	-0.810423	-0.715655	-1.00463	0.421127		-0.322523	-0.770884	-1.4015	-1.00463	-0.546704	-1.20307
CAGGAGCATCACTGAGCATTT	1700019E19Rik	TRCN0000202015	3.05805	2.60228	3.00264	3.23461		5.288	5.03828	5.89899	-2.22995	-1.98022	-2.84093	-2.35037	0.44281		4.84528	4.76642	4.55211	-2.243	-2.16414	-1.94983	-2.11899	0.15171		3.18516	4.40062	2.47793	-0.182521	-1.39798	0.524706	-0.351931	0.972473		5.94144	4.29457	3.13801	-2.70683	-1.05996	0.0966049	-1.2234	1.40885		-2.35037	-2.11899	-0.351931	-1.2234	-2.23468	-0.787663
CTCAGGCTGAGAATTACTTAA	1700019E19Rik	TRCN0000201136	3.80769	3.73207	4.04054	3.93202		3.37481	3.71748	3.34562	0.432871	0.090201	0.462063	0.328378	0.206783		3.54564	3.17121	3.28768	0.186437	0.560863	0.444392	0.397231	0.191617		3.69424	2.90236	1.84538	0.346303	1.13818	2.19516	1.22655	0.927593		1.68651	4.94512	3.32531	2.24551	-1.01311	0.60671	0.613038	1.62932		0.328378	0.397231	1.22655	0.613038	0.362804	0.919793
CGACGACGATATTCCTGTGAT	1700019E19Rik	TRCN0000189622	2.85319	2.85111	3.03961	2.65464		2.72141	1.97022	2.32816	0.131778	0.882971	0.525034	0.513261	0.375735		3.58758	2.95176	1.065	-0.736467	-0.100649	1.7861	0.316329	1.31196		1.89555	1.76102	2.61402	1.14406	1.27859	0.425587	0.949413	0.458606		1.74662	3.79147	1.26621	0.908017	-1.13683	1.38843	0.386539	1.34096		0.513261	0.316329	0.949413	0.386539	0.414795	0.667976
GAGCATCACTGAGCATTTGAA	1700019E19Rik	TRCN0000190841	4.00123	4.51485	4.48929	3.52664		1.62132	2.96334	1.14786	2.37991	1.03789	2.85338	2.09039	0.941735		3.27038	1.7853	0.835218	1.24447	2.72955	3.67963	2.55122	1.22734		2.90107	2.3289	3.42297	1.58822	2.16039	1.06632	1.60497	0.547227		1.47534	0	1.41368	2.0513	3.52664	2.11296	2.56363	0.834557		2.09039	2.55122	1.60497	2.56363	2.32081	2.0843
GTGACCATAGTCCTAGTGTCT	1700019G17Rik	TRCN0000114599	3.10774	3.42173	2.96469	3.71337		1.99981	2.29605	1.97471	1.10793	0.811697	1.13303	1.01755	0.178718		3.0614	2.67858	3.83533	0.360327	0.743152	-0.413604	0.229958	0.589295		2.7456	2.80188	1.58973	0.219089	0.162814	1.37496	0.58562	0.684165		0.149999	0.226422	0.0523899	3.56338	3.48695	3.66098	3.57044	0.0872305		1.01755	0.229958	0.58562	3.57044	0.623756	2.07803
GCTTTCTTGGAGAAATTACGT	1700019G17Rik	TRCN0000114598	5.20288	4.90717	5.32502	5.18102		7.22681	7.64092	7.0186	-2.02393	-2.43804	-1.81572	-2.09257	0.316785		6.49517	7.08198	6.93447	-1.588	-2.17481	-2.02729	-1.93003	0.305254		6.77601	4.94212	5.72789	-1.45099	0.3829	-0.402873	-0.490322	0.920068		5.95934	6.2487	5.39528	-0.778315	-1.06768	-0.214255	-0.68675	0.434018		-2.09257	-1.93003	-0.490322	-0.68675	-2.0113	-0.588536
CCACAAGGTTAATGGGTCTTT	1700019G17Rik	TRCN0000114597	3.28618	2.96108	3.29249	2.9608		3.03236	2.78591	3.49671	0.253825	0.500269	-0.210524	0.18119	0.36092		3.0614	2.09529	3.16242	-0.100318	0.865794	-0.201333	0.188048	0.589115		4.13934	2.46656	2.15987	-0.846847	0.825926	1.13262	0.370565	1.0654		2.49995	3.68494	0.332129	0.460851	-0.724139	2.62867	0.788462	1.70024		0.18119	0.188048	0.370565	0.788462	0.184619	0.579513
GCACACACATACTTTCTGATT	1700019G17Rik	TRCN0000114611	3.5365	4.0067	3.08074	3.61489		3.35462	4.03595	4.22796	0.181884	-0.499449	-0.691459	-0.336341	0.45895		2.90065	2.12712	2.23162	1.10605	1.87958	1.77508	1.5869	0.419696		1.70316	1.67841	3.47016	1.37758	1.40233	-0.389418	0.796831	1.0274		3.20868	3.37575	1.54746	0.406217	0.239145	2.06743	0.904264	1.01079		-0.336341	1.5869	0.796831	0.904264	0.625281	0.850547
GACCAGTACTTTGTGAGCATA	1700019G17Rik	TRCN0000114600	2.73871	3.92084	2.67353	1.96647		3.74434	3.86776	4.28213	-1.00564	-1.12905	-1.54343	-1.22604	0.281708		3.23563	3.6221	3.28354	0.685204	0.298737	0.6373	0.540414	0.210664		1.41084	1.62058	4.52837	1.26269	1.05294	-1.85485	0.153594	1.74252		6.91565	0.226422	2.70271	-4.94918	1.74004	-0.73624	-1.31513	3.38198		-1.22604	0.540414	0.153594	-1.31513	-0.342813	-0.580766
GAGACTGAAGTTCTGGATATT	1700019N12Rik	TRCN0000177175	4.54487	4.96772	4.82352	4.49623		4.28872	4.62335	3.67982	0.256148	-0.0784804	0.865048	0.347572	0.478362		4.1754	4.49476	5.09885	0.792318	0.472954	-0.131133	0.378046	0.468984		2.86867	3.4002	1.89652	1.95485	1.42332	2.927	2.10172	0.762525		2.91585	1.4143	1.37306	1.58038	3.08193	3.12317	2.59516	0.879065		0.347572	0.378046	2.10172	2.59516	0.362809	2.34844
CGTCTACTTCAGAATCACTAA	1700019N12Rik	TRCN0000176718	4.38613	4.89683	4.20069	4.25074		1.21828	2.53196	2.91587	3.16785	1.85417	1.47026	2.16409	0.890222		2.92992	3.70529	2.70418	1.96691	1.19154	2.19265	1.7837	0.5251		3.25702	2.21629	0	0.943675	1.9844	4.20069	2.37626	1.66349		1.61089	0.140069	2.3931	2.63985	4.11068	1.85764	2.86939	1.14392		2.16409	1.7837	2.37626	2.86939	1.97389	2.62282
GCAAATCTGTAAGAAACAGGA	1700019N12Rik	TRCN0000176929	4.52468	4.61499	3.89248	4.94036		4.47425	4.59309	4.96821	0.0504358	-0.0684105	-0.443525	-0.153833	0.257822		4.36685	5.13461	4.74675	0.248144	-0.519618	-0.131762	-0.134412	0.383888		2.8288	3.10573	4.94602	1.06368	0.786752	-1.05354	0.265632	1.1508		5.76882	3.50229	4.67348	-0.828463	1.43807	0.266883	0.292162	1.13348		-0.153833	-0.134412	0.265632	0.292162	-0.144123	0.278897
GAAGAATCTGAGACCTCCTTA	1700019N12Rik	TRCN0000177941	4.56477	4.25362	4.52139	4.848		4.54547	4.35298	3.14669	0.0193017	0.211789	1.41808	0.549723	0.758152		3.69379	4.33584	3.71435	0.559826	-0.0822252	0.539267	0.338956	0.364898		4.00865	3.96816	3.83709	0.512739	0.553229	0.6843	0.583422	0.0896772		4.73695	3.38985	3.06975	0.111047	1.45815	1.77825	1.11581	0.884752		0.549723	0.338956	0.583422	1.11581	0.44434	0.849619
GAATCACTAATATTCAGCCTA	1700019N12Rik	TRCN0000176892	5.08378	5.16447	4.83708	4.7456		4.15497	3.89427	3.84854	0.928809	1.18951	1.23524	1.11785	0.165305		5.20694	4.08613	4.86931	-0.0424636	1.07835	0.295165	0.443682	0.574975		3.8384	4.02498	3.96538	0.998683	0.8121	0.871701	0.894161	0.0952973		2.58144	4.63762	5.56379	2.16416	0.107981	-0.818191	0.484649	1.52644		1.11785	0.443682	0.894161	0.484649	0.780767	0.689405
CACCATCCTTAGCAAAGGCTT	1700019N19Rik	TRCN0000184749	3.03541	3.07555	2.93135	3.85472		4.50938	4.03859	4.67968	-1.47398	-1.00318	-1.64428	-1.37381	0.332075		4.34256	4.05888	5.5298	-1.26701	-0.983333	-2.45425	-1.5682	0.780344		3.47501	5.63789	3.34687	-0.54366	-2.70654	-0.415519	-1.22191	1.28733		4.24767	3.313	3.9744	-0.39295	0.541722	-0.119678	0.00969777	0.48058		-1.37381	-1.5682	-1.22191	0.00969777	-1.47101	-0.606105
GCACAGACACCTGTTGTACTT	1700019N19Rik	TRCN0000196091	3.38353	3.08772	3.64075	2.40406		1.23605	0.857826	1.45724	2.14748	2.5257	1.92629	2.19982	0.303117		1.05072	1.2997	2.38645	2.037	1.78802	0.701273	1.50876	0.710303		0.48351	0.861893	0	3.15724	2.77885	3.64075	3.19228	0.432014		0.113936	0.0482165	0.767778	2.29012	2.35584	1.63628	2.09408	0.397827		2.19982	1.50876	3.19228	2.09408	1.85429	2.64318
CAGCAGGGATTAAACTGCTCT	1700019N19Rik	TRCN0000196002	1.99396	2.05085	2.06363	2.05326		1.55206	1.53375	1.81771	0.441895	0.460204	0.176245	0.359448	0.158922		0.939963	1.38994	0.812393	1.11088	0.660911	1.23845	1.00342	0.303399		1.49816	1.46498	0.907117	0.565474	0.598647	1.15651	0.773544	0.332074		0.349276	1.84114	0.492412	1.70399	0.212125	1.56085	1.15899	0.823125		0.359448	1.00342	0.773544	1.15899	0.681432	0.966266
CGCATGAATCCCTGTGTGAAA	1700019N19Rik	TRCN0000184704	3.52842	3.11177	3.21148	3.5609		2.74022	2.41476	0.613516	0.788198	1.11366	2.9149	1.60559	1.14552		3.7767	2.51175	2.9224	-0.66493	0.600014	0.189366	0.0414834	0.645308		3.08718	1.64979	2.11739	0.124302	1.56169	1.09409	0.926695	0.733171		2.52076	2.60025	2.63561	1.04014	0.960653	0.925291	0.975362	0.0588208		1.60559	0.0414834	0.926695	0.975362	0.823535	0.951028
CAAGATGAAGACCAGGCATTT	1700019O17Rik	TRCN0000363887	3.34722	1.77781	2.89145	3.56934		2.97	3.11633	2.63373	0.377216	0.230889	0.713481	0.440529	0.247447		4.20264	4.03949	1.32898	-2.42483	-2.26168	0.448838	-1.41256	1.61408		2.80845	2.13601	0.175905	0.0830079	0.755445	2.71555	1.18467	1.36775		0	0	0.332129	3.56934	3.56934	3.23721	3.45863	0.191755		0.440529	-1.41256	1.18467	3.45863	-0.486014	2.32165
TGAACATGATGTAGATCAAAC	1700019O17Rik	TRCN0000347163	3.20734	3.52383	2.61173	3.87529		3.63472	4.37616	4.40399	-0.427384	-1.16882	-1.19665	-0.930951	0.436324		4.21458	3.68405	3.42943	-0.690756	-0.160221	0.0944027	-0.252191	0.400578		6.41514	2.98489	3.79727	-3.80341	-0.373159	-1.18554	-1.78737	1.79257		4.46187	1.29948	1.47254	-0.586578	2.57581	2.40275	1.46399	1.77795		-0.930951	-0.252191	-1.78737	1.46399	-0.591571	-0.161689
GGACTTCATTCGGACTGATAC	1700019O17Rik	TRCN0000347164	2.61435	3.33246	3.39388	2.45049		2.80714	2.98543	2.60445	-0.192795	-0.371088	0.00989444	-0.184663	0.190621		1.17818	1.52351	1.89392	2.15428	1.80895	1.43854	1.80059	0.357945		2.11031	1.39772	2.34616	1.28357	1.99616	1.04771	1.44248	0.493789		1.15875	2.03306	1.5656	1.29173	0.417428	0.884885	0.864682	0.437503		-0.184663	1.80059	1.44248	0.864682	0.807964	1.15358
CAGGCGTACATGCAGATTAAC	1700019O17Rik	TRCN0000364040	0	0	0.199896	0		0.0809064	0	0.0442899	-0.0809064	0	-0.0442899	-0.0417321	0.0405138		0	0	0	0	0	0	0	0		0	0.0879768	0.0460276	0.199896	0.111919	0.153868	0.155227	0.0440041		0.0769479	0	0	-0.0769479	0	0	-0.0256493	0.0444259		-0.0417321	0	0.155227	-0.0256493	-0.020866	0.064789
CAGCAACTTCTGCAGTCAAAG	1700019O17Rik	TRCN0000347165	2.89781	3.15869	2.74563	3.04188		2.90482	2.51687	1.14786	-0.00701019	0.38094	1.74996	0.707962	0.923007		1.98068	0.868864	2.46904	1.17801	2.28982	0.689654	1.38583	0.820078		5.26523	3.25573	1.35393	-2.5196	-0.510096	1.3917	-0.545999	1.9559		2.45741	2.44683	0.944509	0.584466	0.595052	2.09737	1.0923	0.870435		0.707962	1.38583	-0.545999	1.0923	1.0469	0.273148
CCAGAGGAAGATTCCCATCAA	1700020D05Rik	TRCN0000112715	3.3005	3.22633	3.71773	4.49402		4.47237	3.40562	4.57978	-1.17188	-0.105118	-1.27928	-0.852093	0.649125		3.60583	4.05337	3.4954	-0.379501	-0.827037	-0.269067	-0.491868	0.29547		2.53875	4.3392	2.62164	1.17897	-0.62147	1.09608	0.551196	1.0164		6.11283	3.82645	0.971968	-1.61882	0.667567	3.52205	0.856933	2.57566		-0.852093	-0.491868	0.551196	0.856933	-0.671981	0.704065
CCACTCAGTACTGTGAAGCTT	1700020D05Rik	TRCN0000112717	3.8666	3.01308	3.76896	4.08111		4.11711	4.14792	4.06554	-0.250508	-0.281315	-0.198939	-0.243587	0.0416216		4.53584	3.73314	3.49181	-1.52276	-0.720061	-0.478729	-0.907184	0.546591		4.03516	4.21281	4.10782	-0.266209	-0.443856	-0.338863	-0.349643	0.0893129		3.1958	3.09506	2.22069	0.885313	0.986051	1.86042	1.24393	0.53627		-0.243587	-0.907184	-0.349643	1.24393	-0.575386	0.447143
GCTATCCGAAGAAACTCATTA	1700020D05Rik	TRCN0000112716	3.75668	3.69276	3.17871	3.99289		2.03069	1.23502	0	1.72599	2.52166	3.75668	2.66811	1.02324		0.426994	2.73476	2.12451	3.26577	0.958005	1.56825	1.93067	1.19581		0.221434	0.461813	0	2.95727	2.71689	3.17871	2.95096	0.230971		0.969914	0.0482165	0.566335	3.02297	3.94467	3.42655	3.46473	0.462033		2.66811	1.93067	2.95096	3.46473	2.29939	3.20784
CCGGCCTCCTGATGATTATTT	1700020D05Rik	TRCN0000112718	0.256481	0.0995552	0.272694	0.230327		0.230261	0.624369	0.490859	0.0262204	-0.367888	-0.234378	-0.192015	0.20044		0.252597	0.432486	0.615497	-0.153042	-0.33293	-0.515942	-0.333972	0.181452		0.0470894	0.646999	0.405102	0.225604	-0.374305	-0.132409	-0.0937033	0.301822		0.149999	0.140069	0.151786	0.0803286	0.0902584	0.0785412	0.0830428	0.00631255		-0.192015	-0.333972	-0.0937033	0.0830428	-0.262993	-0.00533026
CCACCAAGAAGCATTCAGTTT	1700020D05Rik	TRCN0000112719	3.23741	2.98732	3.08074	2.11221		2.59627	2.61932	3.48872	0.641143	0.618092	-0.251304	0.335977	0.508731		2.50308	2.43753	2.31517	0.484238	0.549789	0.672143	0.568724	0.0953728		1.23898	1.76102	4.36775	1.84176	1.31972	-1.28701	0.62482	1.67615		2.51386	2.41959	6.0012	-0.401642	-0.307379	-3.88899	-1.53267	2.04117		0.335977	0.568724	0.62482	-1.53267	0.45235	-0.453924
TCAGAAGCTCCTGTACCACAA	1700020N01Rik	TRCN0000095467	3.2473	2.53274	2.91439	4.15586		1.2881	1.9366	2.04179	1.9592	1.3107	1.20551	1.4918	0.40818		1.46489	0.398108	0.15318	1.06785	2.13463	2.37956	1.86068	0.697446		0.645271	0.811095	0.0460276	2.26912	2.10329	2.86836	2.41359	0.402475		0.113936	2.03306	0.636655	4.04193	2.12281	3.51921	3.22798	0.992154		1.4918	1.86068	2.41359	3.22798	1.67624	2.82078
GACTTCCGATTTCCAAATCCT	1700020N01Rik	TRCN0000095468	3.20734	3.26972	3.26152	3.91887		2.26515	2.39013	2.42346	0.94219	0.817209	0.783875	0.847758	0.0834615		2.58817	3.4482	3.32847	0.68155	-0.178478	-0.0587497	0.148108	0.465837		2.1859	2.63666	2.06246	1.07563	0.62486	1.19906	0.966516	0.302251		1.63654	2.80354	1.71933	2.28233	1.11533	2.19953	1.86573	0.651185		0.847758	0.148108	0.966516	1.86573	0.497933	1.41612
CACAACGTGATGCTGGAGAAT	1700020N01Rik	TRCN0000095464	2.91031	3.33246	3.56668	2.5218		2.65029	2.18589	2.88576	0.260023	0.724423	0.0245489	0.336332	0.356122		2.34905	3.26481	3.38371	0.98341	0.0676524	-0.0512484	0.333271	0.566166		2.76685	0.958419	1.8323	0.799828	2.60826	1.73438	1.71416	0.904387		3.57314	0.0482165	2.719	-1.05134	2.47358	-0.197207	0.408343	1.83883		0.336332	0.333271	1.71416	0.408343	0.334801	1.06125
CCTGCGTTTCACTGCAGAGGA	1700020N01Rik	TRCN0000095466	2.25142	2.53274	2.56177	2.48658		3.04249	2.53945	2.61183	-0.791069	-0.288023	-0.360405	-0.479832	0.271958		1.50435	2.4205	1.65826	1.02839	0.112236	0.87448	0.671703	0.490586		3.1586	5.40082	1.89652	-0.596836	-2.83906	0.665247	-0.923548	1.77485		1.08616	1.68216	1.87289	1.40043	0.804421	0.613692	0.939513	0.410396		-0.479832	0.671703	-0.923548	0.939513	0.0959351	0.00798241
CTGGGACTTCCGATTTCCAAA	1700020N01Rik	TRCN0000095465	0.602961	0.192682	0.375435	0.272288		0.157516	0.507105	0.247384	0.445446	0.0958565	0.355577	0.29896	0.181542		0.156798	0.13137	0.291646	0.0358839	0.0613113	-0.0989647	-0.000589854	0.0861385		0.136894	0.526219	0.175905	0.238541	-0.150784	0.199529	0.0957619	0.214404		0	0.140069	0.636655	0.272288	0.132219	-0.364367	0.0133796	0.334551		0.29896	-0.000589854	0.0957619	0.0133796	0.149185	0.0545707
GAGTCTGACTCCTTTACGGAA	1700020O03Rik	TRCN0000189748	3.35181	3.05088	3.56668	4.06329		5.92434	4.88072	4.95232	-2.57253	-1.52892	-1.60051	-1.90065	0.582965		5.04077	5.04995	4.65992	-1.98988	-1.99907	-1.60904	-1.866	0.222582		3.40443	5.44314	3.98914	0.162247	-1.87646	-0.422457	-0.712222	1.04979		4.64043	3.73367	5.05679	-0.577136	0.329625	-0.993494	-0.413668	0.676537		-1.90065	-1.866	-0.712222	-0.413668	-1.88333	-0.562945
CTTTCCTAAGCCAACCAGGAA	1700020O03Rik	TRCN0000202063	3.40135	3.20413	3.47325	3.33701		3.25789	3.91456	3.43982	0.14346	-0.51321	-0.0384661	-0.136072	0.339042		4.80239	3.52189	2.94356	-1.59826	-0.317759	0.260571	-0.551815	0.95126		2.51383	4.00252	0.216724	0.959418	-0.529275	3.25652	1.22889	1.90723		3.04595	2.41959	2.47215	0.291063	0.917422	0.864863	0.691116	0.347452		-0.136072	-0.551815	1.22889	0.691116	-0.343943	0.960002
GCTGTGTCTTTGTTCCTGAAA	1700020O03Rik	TRCN0000201676	3.94159	3.52383	4.00893	4.36423		4.8824	3.76295	3.75836	-0.940814	0.178635	0.183227	-0.192984	0.647644		4.58957	4.83067	3.71435	-1.06574	-1.30684	-0.190523	-0.854367	0.587409		4.34175	3.84731	4.79585	-0.332822	0.161617	-0.786919	-0.319375	0.474411		4.40331	4.34851	1.33127	-0.0390831	0.0157117	3.03296	1.0032	1.75804		-0.192984	-0.854367	-0.319375	1.0032	-0.523676	0.34191
GAAAGTGTCAGATTGGAGCTA	1700020O03Rik	TRCN0000190470	4.39727	3.92084	3.85148	3.67087		3.99716	3.13621	3.43567	0.400111	1.26106	0.961609	0.874261	0.437072		4.62357	4.11287	4.12884	-0.702727	-0.192033	-0.208005	-0.367588	0.290348		3.35383	3.28394	4.18955	0.497649	0.56754	-0.33807	0.242373	0.503892		2.53446	2.41959	2.51944	1.1364	1.25128	1.15142	1.1797	0.0624392		0.874261	-0.367588	0.242373	1.1797	0.253337	0.711038
CTGGAACCGATACTTGTATTT	1700021F05Rik	TRCN0000183108,TRCN0000328538	2.93499	3.13542	2.85042	3.40931		3.14483	2.84147	2.1572	-0.209837	0.0935218	0.777794	0.220493	0.50591		2.8632	2.37703	1.76909	0.272218	0.758384	1.36633	0.798977	0.548183		2.31655	1.09208	1.55832	0.533868	1.75834	1.29211	1.19477	0.618012		0.317916	0.267734	0.529847	3.0914	3.14158	2.87947	3.03748	0.139126		0.220493	0.798977	1.19477	3.03748	0.509735	2.11613
CAAACTTTGTGCTTCCTGGAA	1700021F05Rik	TRCN0000179806	3.81767	4.51485	4.10426	4.13895		4.15029	4.64259	4.67968	-0.332621	-0.824916	-0.862012	-0.673183	0.295518		5.11115	4.03111	4.33508	-0.596294	0.483747	0.179776	0.0224099	0.556952		4.32513	2.29233	4.93077	-0.220871	1.81193	-0.826511	0.254848	1.38205		5.34664	0.688625	2.37264	-1.20769	3.45033	1.76631	1.33632	2.35859		-0.673183	0.0224099	0.254848	1.33632	-0.325386	0.795582
CCAAGTTAAACACATCAAATT	1700021F05Rik	TRCN0000328600	2.55985	1.8933	2.61173	2.60625		3.06255	3.54601	2.28267	-0.502702	-0.986156	0.277186	-0.403891	0.637441		2.02205	3.12991	1.79261	-0.128749	-1.23661	0.100693	-0.421556	0.715121		2.92647	1.8643	3.43167	-0.314745	0.747435	-0.819937	-0.129082	0.80001		1.9444	0.422081	2.06364	0.661845	2.18416	0.542607	1.12954	0.915277		-0.403891	-0.421556	-0.129082	1.12954	-0.412723	0.500228
GTGTGGCGAAGGACTACAAAG	1700021F05Rik	TRCN0000328542	0.256481	0.44065	0.801635	0.816923		0.807248	1.63505	0.391498	-0.550767	-1.37857	-0.135017	-0.688117	0.63305		0.689138	0.362892	0.116383	-0.248488	0.0777579	0.324267	0.0511788	0.287301		1.46386	0	0.69238	-0.662226	0.801635	0.109255	0.0828882	0.732287		0	0	0.151786	0.816923	0.816923	0.665137	0.766328	0.0876337		-0.688117	0.0511788	0.0828882	0.766328	-0.318469	0.424608
AGAGAAGACTGAGAACGACAA	1700021F05Rik	TRCN0000328539	1.80607	3.05088	1.69119	3.69034		1.97885	1.37547	1.47353	-0.172788	0.430595	0.332537	0.196781	0.323791		0.205492	0.709783	1.04556	2.84539	2.3411	2.00532	2.39727	0.422843		0.705217	0.249307	0	0.985972	1.44188	1.69119	1.37301	0.357617		0.928988	1.17471	0.88797	2.76136	2.51563	2.80237	2.69312	0.155072		0.196781	2.39727	1.37301	2.69312	1.29703	2.03307
CGTCACACAAACTTTGTGCTT	1700021F05Rik	TRCN0000179981	3.23741	3.55923	3.25705	3.41401		2.63027	2.70834	2.41505	0.607143	0.529067	0.822358	0.652856	0.151895		3.56443	2.66418	1.56575	-0.00519244	0.895052	1.99348	0.961114	1.00097		1.17682	1.25298	2.01697	2.08023	2.00407	1.24008	1.77479	0.464637		2.22359	4.13907	1.71933	1.19042	-0.725063	1.69467	0.720008	1.27661		0.652856	0.961114	1.77479	0.720008	0.806985	1.2474
GAGAACAAAGAGACAGGAACA	1700021F05Rik	TRCN0000179502	5.03182	5.04155	4.96753	4.55052		1.14491	2.27826	0.522515	3.8869	2.75356	4.5093	3.71659	0.890178		2.13948	0.843539	1.08419	2.90207	4.19801	3.95736	3.68582	0.689324		2.26769	3.09515	0.571701	2.69984	1.87237	4.39583	2.98935	1.2864		0	0	1.71933	4.55052	4.55052	2.83119	3.97741	0.992658		3.71659	3.68582	2.98935	3.97741	3.7012	3.48338
GACATCGTCACACAAACTTTG	1700021F05Rik	TRCN0000353429	1.76536	2.25897	0.801635	0.536115		0.603256	2.21423	1.99742	1.16211	-0.448866	-0.232055	0.160395	0.874254		0.0541816	0.362892	0	2.20478	1.89607	2.25897	2.11994	0.195758		0.614337	1.98378	0	0.187298	-1.18215	0.801635	-0.0644053	1.01556		0	0.307896	1.60121	0.536115	0.228219	-1.06509	-0.100253	0.84964		0.160395	2.11994	-0.0644053	-0.100253	1.14017	-0.0823291
GATTTGGAAATACCGTCTGAG	1700021F07Rik	TRCN0000346195	2.68152	2.49667	3.35669	3.76572		3.67763	3.44202	3.08972	-0.996109	-0.760499	-0.408201	-0.721603	0.295878		3.50731	1.93668	2.37091	-1.01064	0.559988	0.125756	-0.108299	0.811052		2.82205	1.83916	0	0.534641	1.51753	3.35669	1.80295	1.43251		2.49295	2.25473	2.41327	1.27277	1.511	1.35245	1.37874	0.121267		-0.721603	-0.108299	1.80295	1.37874	-0.414951	1.59085
TGGATAAACACATCAAGATTC	1700021F07Rik	TRCN0000346135	3.11856	3.49669	3.93235	4.16981		3.41047	3.29499	3.05225	-0.291914	-0.176434	0.0663036	-0.134015	0.182837		3.71076	2.84733	3.8854	-0.214066	0.64936	-0.388709	0.0155281	0.555816		2.57133	4.56293	3.36514	1.36102	-0.630582	0.56721	0.432549	1.0026		2.47173	0.183891	1.68656	1.69808	3.98592	2.48325	2.72241	1.16252		-0.134015	0.0155281	0.432549	2.72241	-0.0592433	1.57748
ATTTAACAACGTCCATGAAAG	1700021F07Rik	TRCN0000346138	3.54053	2.49667	2.46412	1.6053		2.66349	3.48141	2.56699	0.877043	0.0591179	0.973536	0.636565	0.502406		2.15196	2.70694	1.86093	0.344711	-0.210273	0.635733	0.256724	0.429811		0.376963	1.67841	2.75233	2.08716	0.78571	-0.288209	0.861552	1.1895		0.969914	3.31792	3.27107	0.635387	-1.71262	-1.66577	-0.914335	1.3423		0.636565	0.256724	0.861552	-0.914335	0.446645	-0.0263915
ACTGTTTGGAGAAGTACTCAG	1700021F07Rik	TRCN0000346193	3.31467	3.00026	3.10586	2.79798		2.29088	1.32439	1.2075	1.02379	1.99028	2.10717	1.70708	0.594628		1.78629	2.39458	3.44063	1.21396	0.605677	-0.440377	0.459754	0.836767		5.20031	3.26519	2.76614	-2.09445	-0.15933	0.339717	-0.638021	1.28575		0.0389869	2.4647	1.33127	2.759	0.333282	1.46672	1.51967	1.21372		1.70708	0.459754	-0.638021	1.51967	1.08342	0.440822
AGCTGCCTAGCCACTTCTATG	1700021F07Rik	TRCN0000346133	2.46983	2.85111	2.20053	2.88845		2.05092	2.30486	1.79197	0.418911	0.164969	0.677861	0.420581	0.25645		1.12854	1.99535	0	1.72257	0.855761	2.85111	1.80981	1.00053		4.18216	5.56503	2.02848	-1.98162	-3.3645	0.172055	-1.72469	1.78222		1.75835	0.140069	1.71933	1.1301	2.74838	1.16912	1.68253	0.923259		0.420581	1.80981	-1.72469	1.68253	1.1152	-0.0210796
ACAAACCGATTCCCTTTATAA	1700023A16Rik	TRCN0000341978	2.75958	2.17015	1.94614	2.88169		3.04753	2.70834	3.35883	-0.287953	0.0512369	-0.599254	-0.278657	0.325345		3.65048	3.69117	3.51673	-1.48033	-1.52101	-1.34658	-1.44931	0.0912605		1.84315	2.21629	3.29062	0.10299	-0.27015	-1.34449	-0.503883	0.751513		2.06263	0	0.703706	0.819053	2.88169	2.17798	1.95957	1.04852		-0.278657	-1.44931	-0.503883	1.95957	-0.863982	0.727846
TTCGGAGGAAGTTTCGGAAAT	1700023A16Rik	TRCN0000352586	0.332754	0	0.0422563	2.05326		1.16361	0.652255	1.04262	-0.830854	-0.3195	-0.709867	-0.620074	0.267241		0.756049	0.212743	0.0786222	-0.756049	-0.212743	-0.0786222	-0.349138	0.358719		0.762771	0.0879768	0.539885	-0.720515	-0.0457204	-0.497628	-0.421288	0.343814		0	0.0482165	0	2.05326	2.00505	2.05326	2.03719	0.0278378		-0.620074	-0.349138	-0.421288	2.03719	-0.484606	0.807952
TGCGAAGAAGCCCGTGAATTG	1700023A16Rik	TRCN0000352508	2.00565	2.47829	2.29093	1.96647		3.79018	3.01258	2.97999	-1.78453	-1.00693	-0.974332	-1.25526	0.458646		2.3812	3.54171	3.28354	0.0970877	-1.06342	-0.805252	-0.590529	0.609324		4.41986	2.90236	0.0460276	-2.12893	-0.611431	2.2449	-0.165151	2.2208		1.54471	1.60367	4.8336	0.42176	0.362797	-2.86714	-0.694194	1.88206		-1.25526	-0.590529	-0.165151	-0.694194	-0.922896	-0.429673
GCTTGCTAACCGAGGTTATAT	1700023A16Rik	TRCN0000341980	2.40947	2.09976	3.11083	2.54765		3.48297	1.37547	2.56699	-1.0735	1.034	-0.157524	-0.065676	1.05675		0.881226	0.868864	0	1.21853	1.2309	2.09976	1.5164	0.505245		1.61215	1.25298	0	1.49869	1.85786	3.11083	2.15579	0.846362		2.92628	2.55924	3.5239	-0.378629	-0.0115852	-0.976246	-0.455487	0.486901		-0.065676	1.5164	2.15579	-0.455487	0.72536	0.850153
ATCGGATGCGGACTCCCATAA	1700023A16Rik	TRCN0000352585	0.0460397	0	0	0		0	0.0427639	0.0442899	0.0460397	0.00327577	0.00174982	0.0170218	0.0251418		0.0541816	0	0	-0.0541816	0	0	-0.0180605	0.0312818		0.0470894	0	0	-0.0470894	0	0	-0.0156965	0.0271871		0	0	0	0	0	0	0	0		0.0170218	-0.0180605	-0.0156965	0	-0.00051939	-0.00784823
GAGAACAGAAAGCTGCTGGTA	1700024B05Rik	TRCN0000182095	3.63016	3.9611	3.7721	4.44441		2.55438	4.94272	2.92182	1.07577	-1.31257	0.708333	0.15718	1.28603		3.04142	3.09278	4.35298	0.91968	0.868328	-0.391878	0.465377	0.742848		2.91383	2.21629	4.61299	0.858271	1.55581	-0.840894	0.524396	1.23274		3.16087	0.71873	0.373899	1.28354	3.72568	4.07051	3.02658	1.51933		0.15718	0.465377	0.524396	3.02658	0.311278	1.77549
CAGCAAGAACATACATCCCAA	1700024B05Rik	TRCN0000192311	2.84019	3.20413	3.03439	4.34469		2.90482	3.13621	3.95967	-0.0646389	-0.296025	-1.11949	-0.493384	0.554427		3.57373	4.33357	4.0819	-0.369598	-1.12944	-0.877767	-0.792268	0.387068		3.5828	3.59295	2.15987	-0.548416	-0.558564	0.874513	-0.0774888	0.824474		1.15875	5.88381	1.37306	3.18594	-1.53912	2.97163	1.53948	2.6683		-0.493384	-0.792268	-0.0774888	1.53948	-0.642826	0.730997
CCTGAAAGAATGCAATCAATT	1700024B05Rik	TRCN0000023061	2.21158	2.25897	2.70675	1.9918		3.84333	4.33804	3.4563	-1.63175	-2.12646	-1.24472	-1.66764	0.441962		3.48775	2.82162	3.65786	-1.22879	-0.562658	-1.39889	-1.06345	0.441956		4.4639	2.59223	3.54819	-1.75716	0.114522	-0.841447	-0.828027	0.93591		4.56897	0.5615	1.65302	-2.57717	1.4303	0.338781	-0.269361	2.0718		-1.66764	-1.06345	-0.828027	-0.269361	-1.36554	-0.548694
CACAACATGAGAAGACAATGT	1700024B05Rik	TRCN0000192160	4.48554	4.84756	5.01073	4.57797		5.68653	5.81112	6.08606	-1.20098	-1.32558	-1.60052	-1.37569	0.204425		5.22771	5.01635	5.9403	-0.38015	-0.168789	-1.09274	-0.547226	0.484104		5.16606	4.8413	5.42129	-0.155329	0.169433	-0.41056	-0.132152	0.290691		5.36594	5.31266	5.13022	-0.787968	-0.734693	-0.552254	-0.691638	0.123615		-1.37569	-0.547226	-0.132152	-0.691638	-0.96146	-0.411895
GAATGCAATCAATTGAAGGAA	1700024B05Rik	TRCN0000191111	4.638	5.09077	4.66859	4.74373		3.69701	4.11322	4.28213	0.940991	0.524772	0.355861	0.607208	0.301149		3.91489	4.20275	4.58109	1.17589	0.888021	0.509681	0.857864	0.334126		4.11192	4.07966	3.53615	0.556676	0.588934	1.13244	0.75935	0.323509		5.32906	3.80556	3.0824	-0.585322	0.938171	1.66133	0.671394	1.14684		0.607208	0.857864	0.75935	0.671394	0.732536	0.715372
CCATTGACAAGTACAAGGAAT	1700024B05Rik	TRCN0000192347	3.05243	3.91402	3.04482	2.9672		4.15029	3.88842	4.64954	-1.09787	-0.835994	-1.59711	-1.17699	0.386678		4.83371	5.29851	5.19904	-0.919688	-1.38449	-1.28502	-1.1964	0.244746		4.84485	4.63407	6.12766	-1.80003	-1.58925	-3.08284	-2.15737	0.808378		5.24714	4.91456	4.45493	-2.27994	-1.94736	-1.48773	-1.90501	0.397802		-1.17699	-1.1964	-2.15737	-1.90501	-1.18669	-2.03119
GAGACGGTCTTTCAATGTGAT	1700024G13Rik	TRCN0000181743	3.85047	4.62338	3.95741	3.63915		4.43054	4.29667	4.12861	-0.580062	-0.446198	-0.278135	-0.434798	0.151286		3.92582	4.59491	3.48099	0.697553	0.028467	1.14238	0.622801	0.560708		3.54639	3.25573	1.68007	0.411015	0.701685	2.27734	1.13001	1.00418		2.77284	3.313	2.97793	0.86631	0.326152	0.661224	0.617895	0.272673		-0.434798	0.622801	1.13001	0.617895	0.0940015	0.873954
GAGCAGATAGAAGACTGGAAT	1700024G13Rik	TRCN0000181789	4.7979	4.89683	4.64136	4.10743		4.84814	4.53811	4.57035	-0.0502426	0.259789	0.227551	0.145699	0.170455		6.0689	5.53342	5.30094	-1.17207	-0.636584	-0.404106	-0.737585	0.393816		4.9195	4.03609	4.39469	-0.278141	0.605273	0.246673	0.191268	0.444306		4.53699	4.41208	5.09631	-0.429559	-0.304649	-0.988887	-0.574365	0.364379		0.145699	-0.737585	0.191268	-0.574365	-0.295943	-0.191548
CCAAAGACGGACATCAGATCA	1700024G13Rik	TRCN0000182184	2.60669	3.18159	3.12073	3.2609		1.40269	2.24202	1.35545	1.20399	0.364667	1.25123	0.939964	0.498782		2.13948	2.89742	1.46691	1.04211	0.284173	1.71468	1.01366	0.715679		2.43636	3.96816	1.2198	0.684372	-0.847428	1.90092	0.579289	1.37719		0.0389869	3.91687	1.82851	3.22191	-0.655972	1.43239	1.33278	1.94086		0.939964	1.01366	0.579289	1.33278	0.97681	0.956032
GCAGATAGAAGACTGGAATCT	1700024G13Rik	TRCN0000181858	5.09614	4.35783	4.57993	4.53553		5.19792	4.46138	4.45409	-0.101776	0.634766	0.64205	0.39168	0.427361		4.25852	4.46601	4.30473	0.0993136	-0.108178	0.0530973	0.0147444	0.108933		2.73845	5.42847	3.44031	1.84149	-0.848538	1.13962	0.710857	1.39533		5.87902	6.81693	5.70139	-1.3435	-2.2814	-1.16586	-1.59692	0.599395		0.39168	0.0147444	0.710857	-1.59692	0.203212	-0.443031
ACCACCACCTGAGCCATAATC	1700024P16Rik	TRCN0000352498	1.4936	2.19287	2.49487	0.788289		1.46431	2.39838	0	0.0292922	-0.904784	1.4936	0.206036	1.20892		2.9515	1.57057	2.63432	-0.758624	0.6223	-0.441451	-0.192592	0.723316		0.94785	1.32716	0	1.54702	1.16771	2.49487	1.73654	0.683576		0	0.0482165	1.51049	0.788289	0.740072	-0.722201	0.26872	0.858501		0.206036	-0.192592	1.73654	0.26872	0.00672225	1.00263
ACCTAGTGATCTGTCGCAATT	1700024P16Rik	TRCN0000352574	1.4936	3.07555	1.29656	3.09545		1.10678	1.4248	2.4484	0.386819	0.0687959	-0.954797	-0.166394	0.701048		2.00839	1.03469	0.116383	1.06716	2.04086	2.95916	2.02239	0.946138		0.0470894	1.49747	0	1.24947	-0.200911	1.29656	0.781708	0.851299		0	0.0948736	0.289112	3.09545	3.00058	2.80634	2.96746	0.147374		-0.166394	2.02239	0.781708	2.96746	0.927999	1.87458
CTGTAGCGTGTGCCAGTAATT	1700024P16Rik	TRCN0000341621	1.04969	0.362635	1.50733	0.391308		0	0.0427639	0	1.04969	1.00693	1.04969	1.03544	0.0246898		0	0.13137	0	0.362635	0.231265	0.362635	0.318845	0.0758467		0.0926903	0	0	1.41464	1.50733	1.50733	1.47643	0.0535148		0	0.0948736	0.0523899	0.391308	0.296434	0.338918	0.34222	0.0475229		1.03544	0.318845	1.47643	0.34222	0.677142	0.909325
GAACGATTTCAGTATGGTAAA	1700024P16Rik	TRCN0000341553	2.90408	2.19287	3.14517	2.45049		3.89179	2.60512	1.08564	-0.987708	0.298955	1.81844	0.376561	1.40468		4.06097	4.11816	2.83451	-1.8681	-1.92529	-0.641634	-1.47834	0.725172		5.50333	5.0826	3.92284	-2.35817	-1.93743	-0.777675	-1.69109	0.818534		0	3.72257	1.51049	2.45049	-1.27208	0.939998	0.706135	1.87227		0.376561	-1.47834	-1.69109	0.706135	-0.550889	-0.492477
GCCATTGGATGTGACTAAATC	1700024P16Rik	TRCN0000341554	1.97027	2.3014	2.00073	2.04118		0.708855	0.566928	1.22685	1.26142	1.40335	0.743429	1.13606	0.347358		0.205492	1.16307	0	2.09591	1.13833	2.3014	1.84521	0.620742		0.550406	0.170896	0	1.45032	1.82984	2.00073	1.7603	0.281715		0.98995	0	1.33127	1.05123	2.04118	0.709913	1.26744	0.691468		1.13606	1.84521	1.7603	1.26744	1.49064	1.51387
GAAACTTCCTGTAAGCGACAA	1700025E21Rik	TRCN0000181566	4.16144	4.31186	4.39868	4.71359		5.00797	3.94024	4.32316	-0.846533	0.221204	-0.161718	-0.262349	0.540935		4.06428	4.83388	4.59787	0.247588	-0.52202	-0.286011	-0.186814	0.394277		3.65678	3.46735	3.72484	0.741901	0.931323	0.673841	0.782355	0.133423		4.90069	5.04504	2.87986	-0.187094	-0.331444	1.83373	0.438398	1.21055		-0.262349	-0.186814	0.782355	0.438398	-0.224582	0.610376
GATGACTCTTGCGGGACAATA	1700025E21Rik	TRCN0000182369	3.18693	3.87942	3.80007	3.28672		3.35868	3.84377	2.38092	-0.171746	-0.65684	0.806013	-0.00752421	0.745125		2.31617	2.59757	2.43955	1.56325	1.28184	1.43987	1.42832	0.141058		2.86867	3.20744	2.58314	0.931407	0.592635	1.21694	0.913659	0.312529		2.54127	1.85476	1.5656	0.745451	1.43196	1.72112	1.29951	0.501138		-0.00752421	1.42832	0.913659	1.29951	0.710399	1.10658
CAATAGGAAGTTTCCTGCTTT	1700025E21Rik	TRCN0000176664	3.28618	3.05088	3.49242	3.16393		3.01702	3.3082	3.79122	0.269164	-0.0220144	-0.505038	-0.0859627	0.391042		3.88903	3.5018	3.95218	-0.838148	-0.450914	-0.901296	-0.73012	0.243852		3.39537	4.11149	4.89349	0.0970581	-0.619072	-1.40107	-0.641026	0.749303		3.11143	2.80354	2.79015	0.0524934	0.360384	0.373776	0.262218	0.18175		-0.0859627	-0.73012	-0.641026	0.262218	-0.408041	-0.189404
CGGGACAATAGGAAGTTTCCT	1700025E21Rik	TRCN0000182146	0	0.0995552	0.123228	0.0965863		0.157516	0.124667	0.613516	-0.157516	-0.124667	-0.613516	-0.298566	0.273248		0.106402	0.13137	0.116383	-0.00684669	-0.0318152	-0.0168277	-0.0184965	0.0125676		0	0.394397	0.369343	0.123228	-0.271169	-0.246115	-0.131352	0.220828		0.468312	0	0	-0.371725	0.0965863	0.0965863	-0.0595176	0.27038		-0.298566	-0.0184965	-0.131352	-0.0595176	-0.158531	-0.0954348
CTTTGGTACTTCATCATCATA	1700025E21Rik	TRCN0000177562	3.87619	3.91402	3.55213	3.55666		1.82294	2.24202	2.60445	2.05325	1.63417	1.27174	1.65305	0.391096		2.98675	2.88506	2.24019	0.927267	1.02896	1.67382	1.21002	0.404874		2.70947	3.17767	4.13469	0.842667	0.374461	-0.58256	0.211523	0.72645		1.76999	0.939316	1.05134	1.78668	2.61734	2.50532	2.30311	0.450742		1.65305	1.21002	0.211523	2.30311	1.43153	1.25732
CCGTGGAAGAGGTCAAATACA	1700025G04Rik	TRCN0000189533	1.57436	0.777729	1.86606	0.352715		1.49416	1.21646	2.08483	0.0802083	0.357906	-0.510465	-0.024117	0.443486		1.56158	1.9486	0.741669	-0.78385	-1.17087	0.0360607	-0.639555	0.61627		0.0470894	0.861893	0.133899	1.81897	1.00416	1.73216	1.51843	0.447477		0.219528	1.50347	0.244773	0.133187	-1.15076	0.107942	-0.303209	0.734105		-0.024117	-0.639555	1.51843	-0.303209	-0.331836	0.607611
GCCTAGTTTCTCTGCTTGAAA	1700025G04Rik	TRCN0000201360	4.07526	4.14712	4.18663	3.67087		4.84814	3.92603	3.32333	-0.772885	0.149229	0.751928	0.042757	0.767962		4.22348	4.82905	3.97548	-0.0763615	-0.681936	0.171635	-0.195554	0.439091		3.76636	3.2366	3.39212	0.420269	0.950026	0.794511	0.721602	0.2723		5.76374	2.57578	0.736097	-2.09287	1.09509	2.93477	0.645662	2.54377		0.042757	-0.195554	0.721602	0.645662	-0.0763986	0.683632
CTACCAGAATGGAGATGTGTT	1700025G04Rik	TRCN0000201070	2.96526	2.74748	2.47187	3.67479		2.15735	1.13974	1.65586	0.807911	1.82552	1.3094	1.31428	0.508821		0.252597	2.39458	0.615497	2.49489	0.352904	2.13199	1.65992	1.14636		2.65731	0.861893	2.78662	-0.185438	1.60998	-0.314753	0.369929	1.07586		0.349276	0	1.54746	3.32551	3.67479	2.12732	3.04254	0.811613		1.31428	1.65992	0.369929	3.04254	1.4871	1.70623
GATGTGTTTGGCGATGAGTAT	1700025G04Rik	TRCN0000192715	4.43453	4.56361	4.17243	4.30734		4.23228	4.14301	5.60118	0.202253	0.291521	-1.16665	-0.224292	0.817325		4.50213	4.38494	3.98827	0.0614852	0.178668	0.575345	0.271833	0.269301		4.07263	3.46735	2.46951	0.0998022	0.705077	1.70292	0.835933	0.80953		4.09648	6.98775	5.17226	0.210861	-2.68041	-0.86492	-1.11149	1.46132		-0.224292	0.271833	0.835933	-1.11149	0.0237705	-0.137778
GAAGTCACTGCCTGACAATAA	1700025K23Rik	TRCN0000181740	3.97172	3.93439	4.38438	3.80198		2.74022	2.39838	3.35004	1.2315	1.57333	0.621679	1.14217	0.482076		2.67718	3.8136	3.52728	1.2572	0.120788	0.407102	0.59503	0.591055		2.84221	2.87789	0.0906321	1.54216	1.50649	4.29374	2.44746	1.59902		1.5979	1.7566	0.529847	2.20409	2.04538	3.27214	2.5072	0.667189		1.14217	0.59503	2.44746	2.5072	0.868601	2.47733
GATGTTCCCATCACTGTCTAT	1700025K23Rik	TRCN0000181908	2.70323	2.4217	2.75201	1.91442		2.96468	3.44998	3.08442	-0.26145	-0.746752	-0.381195	-0.463132	0.252814		3.64166	3.82658	2.60806	-1.21996	-1.40488	-0.186357	-0.937065	0.656674		0.94785	3.11623	4.07489	1.80416	-0.36422	-1.32289	0.0390176	1.60205		1.69873	2.70922	2.627	0.215687	-0.794807	-0.712579	-0.430566	0.56118		-0.463132	-0.937065	0.0390176	-0.430566	-0.700099	-0.195774
CTGCCTGACAATAACTGATGT	1700025K23Rik	TRCN0000198801	1.70924	1.83671	1.53718	1.41239		1.16361	1.63505	1.71185	0.545632	0.0741932	-0.00261154	0.205738	0.296851		1.02382	1.50747	1.42238	0.812896	0.329238	0.414332	0.518822	0.258205		1.17682	0.811095	1.47664	0.360363	0.726089	0.0605396	0.382331	0.333318		0.704888	1.37703	3.66938	0.707498	0.0353525	-2.25699	-0.504713	1.55428		0.205738	0.518822	0.382331	-0.504713	0.36228	-0.0611915
GACAATAACTGATGTTCCCAT	1700025K23Rik	TRCN0000178375	4.78947	4.48755	4.50259	4.81111		5.26546	4.15768	4.82004	-0.475997	0.63179	-0.0305792	0.041738	0.557423		4.66768	4.65438	4.64708	-0.180134	-0.166831	-0.159533	-0.168833	0.0104452		4.43984	3.70153	6.52658	0.0627465	0.801063	-2.02399	-0.386726	1.46518		4.93597	5.41159	6.47178	-0.124861	-0.600476	-1.66067	-0.795336	0.78623		0.041738	-0.168833	-0.386726	-0.795336	-0.0635473	-0.591031
GAGGACATAATTGCTCCTGTA	1700027A23Rik	TRCN0000190546	3.95974	3.79283	3.93516	3.87869		3.86348	4.53437	3.3892	0.0962642	-0.574626	0.57054	0.0307261	0.57539		4.0872	3.74345	5.09176	-0.294366	0.0493818	-1.29893	-0.514638	0.700624		0.582726	2.5771	3.20192	3.35243	1.35805	0.733235	1.81457	1.36797		1.72288	2.32491	1.19808	2.15581	1.55378	2.6806	2.13006	0.563853		0.0307261	-0.514638	1.81457	2.13006	-0.241956	1.97232
CGCAGACAAGGACTTTAGAAA	1700027A23Rik	TRCN0000190954	4.18735	3.44084	4.21462	3.32211		2.87677	2.88912	3.38059	1.31057	1.29823	0.806758	1.13852	0.287381		2.00839	3.57671	4.011	1.43245	-0.135876	-0.570161	0.242137	1.05346		2.43636	2.36457	0.0460276	1.77826	1.85005	4.16859	2.59896	1.35981		5.47302	1.97188	1.15081	-2.15091	1.35023	2.1713	0.456872	2.29542		1.13852	0.242137	2.59896	0.456872	0.690329	1.52792
GTCTCCAGAACTGAGGACATA	1700027A23Rik	TRCN0000190057	3.22746	3.20413	2.89145	3.18605		1.46431	2.41476	1.72552	1.76315	0.8127	1.50194	1.35926	0.491025		2.9515	2.69283	2.65372	0.252636	0.511305	0.550418	0.43812	0.16182		4.52962	2.54638	3.15544	-1.63817	0.345077	-0.263983	-0.519025	1.01592		1.43206	2.32491	1.82851	1.75399	0.861138	1.35753	1.32422	0.447357		1.35926	0.43812	-0.519025	1.32422	0.898691	0.402597
GCAGCAGCAACAGATTGGAAT	1700027A23Rik	TRCN0000189936	4.27936	4.88641	4.71505	3.87869		3.852	3.64994	4.0709	0.427363	0.629424	0.208458	0.421748	0.210539		4.23818	2.75527	3.9417	0.648233	2.13114	0.944714	1.24136	0.784701		4.12295	4.31661	5.16258	0.592099	0.398434	-0.447536	0.180999	0.552873		6.39181	3.9679	2.51944	-2.51313	-0.089213	1.35924	-0.414366	1.95655		0.421748	1.24136	0.180999	-0.414366	0.831556	-0.116684
GCACGATGAGAGTGGAATTTA	1700028P14Rik	TRCN0000177996	4.87166	4.89683	4.83107	4.78054		5.41338	5.36962	4.97395	-0.541724	-0.497963	-0.102284	-0.380657	0.242069		5.73336	5.69258	5.64328	-0.83653	-0.795749	-0.746446	-0.792908	0.0451091		5.21327	3.83465	3.44461	-0.382203	0.996422	1.38646	0.666893	0.929238		4.01082	3.83335	3.63543	0.769725	0.947199	1.14511	0.954011	0.187786		-0.380657	-0.792908	0.666893	0.954011	-0.586783	0.810452
CAAAGACTTGGTGGAGAAGAA	1700028P14Rik	TRCN0000178580	4.20267	4.23184	4.03793	4.48735		4.60139	4.22885	4.46635	-0.398715	-0.0261739	-0.263679	-0.229523	0.188605		4.27287	3.75368	4.32705	-0.0410272	0.478161	-0.0952061	0.113976	0.316555		5.05813	3.19758	1.19958	-1.0202	0.840347	2.83835	0.886165	1.92968		3.50516	4.09097	3.37243	0.982196	0.396385	1.11492	0.831166	0.382335		-0.229523	0.113976	0.886165	0.831166	-0.0577735	0.858665
CAACATACAAGCGATTTGGAA	1700028P14Rik	TRCN0000197629	3.97172	4.29095	4.36993	3.70191		4.58067	4.39691	4.69018	-0.608953	-0.425191	-0.718457	-0.584201	0.148192		4.77643	5.16942	3.96258	-0.48548	-0.878467	0.328372	-0.345192	0.615529		4.37903	5.03635	5.43108	-0.00910221	-0.666422	-1.06115	-0.578891	0.531458		4.81203	0.140069	2.98468	-1.11012	3.56184	0.717223	1.05631	2.35436		-0.584201	-0.345192	-0.578891	1.05631	-0.464696	0.238711
CCTATGTATGTCAACATACAA	1700028P14Rik	TRCN0000197522	4.62668	4.44085	4.78826	4.51164		4.50756	4.17219	4.50648	0.119122	0.454485	0.120196	0.231267	0.193312		4.91098	4.83067	4.29653	-0.47013	-0.389814	0.144319	-0.238541	0.33399		5.50965	3.01886	4.97754	-0.721392	1.7694	-0.189278	0.286243	1.31172		4.26422	1.7566	4.2146	0.247423	2.75504	0.297039	1.09983	1.43366		0.231267	-0.238541	0.286243	1.09983	-0.00363697	0.693038
GAGAGTGGAATTTATGCTAAT	1700028P14Rik	TRCN0000177123	4.6969	4.98083	5.01073	4.13042		5.59652	5.65708	5.89673	-0.899617	-0.960177	-1.19982	-1.01987	0.158757		6.07792	5.96922	6.08897	-1.09708	-0.988391	-1.10813	-1.06454	0.0661754		6.00833	5.67565	6.16464	-0.997603	-0.664922	-1.15391	-0.938811	0.249739		4.45467	4.50786	4.09794	-0.324251	-0.377433	0.0324873	-0.223065	0.222907		-1.01987	-1.06454	-0.938811	-0.223065	-1.0422	-0.580938
GAGAAAGACAACTGAGGATAA	1700029G01Rik	TRCN0000192967	4.83771	5.27241	5.36822	4.78236		4.57893	4.49641	4.94065	0.258775	0.341295	-0.10294	0.16571	0.236288		3.47291	4.44722	4.70863	1.7995	0.825198	0.563782	1.06283	0.651231		5.2477	3.73598	3.53211	0.120528	1.63225	1.83611	1.1963	0.937202		4.10339	0.422081	3.34119	0.678969	4.36028	1.44117	2.16014	1.94312		0.16571	1.06283	1.1963	2.16014	0.614269	1.67822
CCTGGTGAAAGTTCTGAGAAA	1700029G01Rik	TRCN0000190434	0.663285	0.514661	0.896828	0.977731		1.5378	0.507105	1.06429	-0.874516	0.15618	-0.401006	-0.373114	0.515914		0.850935	0.918219	1.14025	-0.336274	-0.403558	-0.625591	-0.455141	0.151399		0.705217	0.958419	1.13716	0.191611	-0.0615903	-0.240332	-0.0367704	0.217039		0.75258	0.688625	1.51049	0.225152	0.289107	-0.532758	-0.00616673	0.457161		-0.373114	-0.455141	-0.0367704	-0.00616673	-0.414127	-0.0214686
GTGTTGGAATCCTTAAAGGAA	1700029G01Rik	TRCN0000192790	3.9077	3.83677	4.27123	3.87529		3.41438	3.43401	2.04179	0.493324	0.473696	1.86592	0.944312	0.798193		2.51278	2.89742	2.47631	1.32399	0.939357	1.36046	1.20793	0.233309		3.51743	3.07376	3.21205	0.753804	1.19747	1.05918	1.00348	0.227015		4.49028	2.61633	2.97114	-0.614989	1.25896	0.904149	0.51604	0.995436		0.944312	1.20793	1.00348	0.51604	1.07612	0.759762
CTGATGCCTAAATCATCTCTA	1700029G01Rik	TRCN0000192284	3.79426	4.90029	4.5637	3.97076		4.6749	4.34446	3.98829	-0.880644	-0.550201	-0.194035	-0.541627	0.343385		4.71889	4.31757	4.69466	0.181392	0.582721	0.205628	0.323247	0.225038		4.75552	4.20299	5.13357	-0.191818	0.360709	-0.569861	-0.133656	0.468004		7.19671	6.86399	5.04229	-3.22595	-2.89323	-1.07153	-2.3969	1.1598		-0.541627	0.323247	-0.133656	-2.3969	-0.10919	-1.26528
GTCATCACCTGTGCCATCAAA	1700029H14Rik	TRCN0000182544	3.9232	3.30143	3.93235	4.00849		3.79618	3.40562	3.51649	0.127021	0.517587	0.406711	0.35044	0.201272		3.97229	3.00983	3.52026	-0.670862	0.291603	-0.218826	-0.199362	0.481528		1.4464	2.21629	2.46104	2.48595	1.71606	1.47131	1.89111	0.529484		3.22567	0.805449	2.79784	0.782813	3.20304	1.21065	1.73217	1.29165		0.35044	-0.199362	1.89111	1.73217	0.075539	1.81164
GCAGAAACCATCTGTGTTTGT	1700029H14Rik	TRCN0000181836	4.16666	4.74752	4.31713	4.16146		4.56669	5.55645	5.74733	-0.400035	-1.38979	-1.58067	-1.1235	0.633765		4.80239	4.85305	4.29653	-0.0548739	-0.105531	0.450983	0.0968594	0.307724		5.00098	3.37419	4.78909	-0.683855	0.942936	-0.471966	-0.0709617	0.88443		3.70323	3.84704	3.85412	0.458231	0.314418	0.307341	0.359997	0.0851468		-1.1235	0.0968594	-0.0709617	0.359997	-0.51332	0.144518
CGCTGGAGTTACAATGTCGTA	1700029H14Rik	TRCN0000182188	3.35638	3.40236	3.61648	3.18605		3.30496	2.29605	2.50496	0.0514193	1.06033	0.851424	0.654392	0.532535		2.63337	3.14554	3.28354	0.768998	0.256827	0.118824	0.38155	0.342561		0.897348	1.73401	2.74537	2.71913	1.88247	0.871108	1.82424	0.925387		3.84197	2.60025	3.53775	-0.655923	0.5858	-0.351703	-0.140609	0.647217		0.654392	0.38155	1.82424	-0.140609	0.517971	0.841814
CCCGTACCACACAAAGAAGAA	1700029H14Rik	TRCN0000200201	3.44925	2.8794	2.66679	3.0358		4.42861	4.7286	4.7911	-0.979356	-1.27935	-1.34185	-1.20018	0.193778		4.68065	4.55646	5.51662	-1.80126	-1.67706	-2.63722	-2.03851	0.522203		4.30347	4.67371	5.93624	-1.63668	-2.00692	-3.26945	-2.30435	0.856057		0.379968	4.63762	5.36582	2.65583	-1.60181	-2.33002	-0.425335	2.6931		-1.20018	-2.03851	-2.30435	-0.425335	-1.61935	-1.36484
CTGTGCCATCAAAGAAGAGAA	1700029H14Rik	TRCN0000198790	3.83417	3.7475	3.48095	3.7948		3.50146	4.20786	4.95377	0.33271	-0.373695	-1.1196	-0.386862	0.726245		4.43224	4.69565	4.42057	-0.684736	-0.948147	-0.673066	-0.76865	0.155559		4.42877	5.46178	5.16128	-0.947828	-1.98084	-1.68033	-1.53633	0.531346		2.65857	4.48395	4.19143	1.13623	-0.689151	-0.396625	0.0168189	0.980412		-0.386862	-0.76865	-1.53633	0.0168189	-0.577756	-0.759756
GCAAATACAATGACTCTGTAA	1700029I01Rik	TRCN0000086298	5.1551	5.25902	5.14404	5.11049		6.97196	6.13826	6.16903	-1.81686	-0.983162	-1.01393	-1.27132	0.472703		6.48103	6.62847	5.84019	-1.22201	-1.36945	-0.58117	-1.05754	0.419087		4.95543	4.28904	4.68385	0.188612	0.855003	0.460189	0.501268	0.335089		7.93991	4.77468	4.25708	-2.82942	0.335803	0.853413	-0.546736	1.99374		-1.27132	-1.05754	0.501268	-0.546736	-1.16443	-0.0227342
CAGGAGATAAACCTTACAAAT	1700029I01Rik	TRCN0000086301	0.602961	0.192682	0.699715	0.536115		0.194347	0.566928	0.0872605	0.408615	0.0360331	0.515701	0.320116	0.251782		0.618971	0.432486	0.985616	-0.42629	-0.239804	-0.792934	-0.486343	0.281413		0.0926903	0	0	0.607025	0.699715	0.699715	0.668818	0.0535148		0	0	0.0523899	0.536115	0.536115	0.483725	0.518652	0.0302473		0.320116	-0.486343	0.668818	0.518652	-0.0831132	0.593735
CCAGGAACACTAAAGAAGTTT	1700029I01Rik	TRCN0000086299	3.16624	3.03839	3.38979	3.33206		2.97	3.17036	3.09499	0.196239	-0.00412186	0.0712473	0.087788	0.101199		3.25889	3.28846	3.23287	-0.2205	-0.250069	-0.194478	-0.221682	0.0278146		4.37903	3.97394	3.44461	-0.989239	-0.584147	-0.0548178	-0.542735	0.468585		2.50692	1.55444	2.53794	0.825143	1.77762	0.794127	1.1323	0.559083		0.087788	-0.221682	-0.542735	1.1323	-0.0669471	0.294782
CAGGAGAGAAACCTTACAAAT	1700029I01Rik	TRCN0000086300	0.440098	0.0995552	0.272694	0.313062		0.157516	0.239413	0.169543	0.282582	0.200685	0.270555	0.251274	0.0442224		0.156798	0.13137	0.50596	-0.0572426	-0.0318152	-0.406405	-0.165154	0.209316		0.221434	0	0.175905	0.0512593	0.272694	0.0967881	0.140247	0.116939		0.113936	0	0.289112	0.199126	0.313062	0.0239497	0.178713	0.145633		0.251274	-0.165154	0.140247	0.178713	0.0430599	0.15948
CAAGTGGATTAGGAAGCTATT	1700029J07Rik	TRCN0000201075	3.45353	3.69276	3.70463	3.53528		2.9432	1.90218	2.27339	0.510327	1.55135	1.18014	1.0806	0.5276		2.48347	2.37703	2.54022	1.20929	1.31573	1.15254	1.22585	0.0828436		1.58049	2.622	0.856354	2.12415	1.08263	2.84828	2.01835	0.887566		0	0.0482165	1.41368	3.53528	3.48706	2.1216	3.04798	0.802632		1.0806	1.22585	2.01835	3.04798	1.15323	2.53317
GCAAAGCTTTCATCCCTAGTA	1700029J07Rik	TRCN0000201725	4.40171	4.11773	4.6136	3.58607		4.75105	4.35086	3.98262	-0.349339	0.0508517	0.419092	0.0402016	0.384326		4.27001	4.95264	4.31085	-0.152276	-0.834905	-0.19312	-0.393434	0.382871		5.31176	4.5319	4.14266	-0.698163	0.0817055	0.470943	-0.0485047	0.59533		4.3864	3.37102	4.7744	-0.80033	0.215053	-1.18833	-0.591203	0.724688		0.0402016	-0.393434	-0.0485047	-0.591203	-0.176616	-0.319854
CCTTCGAAAGGTGAAAGGGTT	1700029J07Rik	TRCN0000189638	3.21743	2.92082	2.06363	2.90854		3.05756	3.40971	4.21591	0.159868	-0.192274	-0.998478	-0.343628	0.59382		3.3858	3.49774	2.40944	-0.464982	-0.576925	0.511374	-0.176844	0.598637		4.26166	3.2366	3.23707	-2.19804	-1.17298	-1.17344	-1.51482	0.591685		1.57155	1.4143	3.8688	1.337	1.49424	-0.960255	0.623661	1.37396		-0.343628	-0.176844	-1.51482	0.623661	-0.260236	-0.445578
GAAAGTATAATGGCGCTGAAT	1700029J07Rik	TRCN0000192668	5.1084	4.45502	4.53255	4.52905		4.23228	4.71709	4.59102	0.876123	0.39131	0.517377	0.594937	0.25154		3.8853	4.79808	4.55727	0.569719	-0.343059	-0.102247	0.0414709	0.473056		4.41762	4.13234	4.20231	0.114926	0.40021	0.330235	0.28179	0.148684		5.80603	5.66838	3.02457	-1.27698	-1.13933	1.50448	-0.303941	1.56765		0.594937	0.0414709	0.28179	-0.303941	0.318204	-0.0110755
GCGACAAATATGTGTCACCAT	1700029J07Rik	TRCN0000201813	4.36358	4.14129	4.28009	4.10453		4.98713	4.89975	5.40921	-0.623549	-0.536167	-1.04562	-0.735114	0.272436		5.01539	4.51495	4.91823	-0.874098	-0.373666	-0.776942	-0.674902	0.265362		5.467	6.95482	4.59569	-1.18692	-2.67473	-0.315601	-1.39242	1.19291		5.51856	5.41619	5.33311	-1.41404	-1.31166	-1.22858	-1.31809	0.0928949		-0.735114	-0.674902	-1.39242	-1.31809	-0.705008	-1.35525
TCCATGGCAACTAACAGTAAC	1700029J11Rik	TRCN0000267037	2.37381	1.00015	2.29967	3.02357		1.94683	2.50163	1.44077	0.426974	-0.127818	0.933041	0.410733	0.530616		2.12689	2.18876	1.55204	-1.12675	-1.18861	-0.551893	-0.95575	0.351115		2.08797	2.73532	4.86969	0.2117	-0.435654	-2.57002	-0.931326	1.4556		0.496597	1.6668	0.453979	2.52697	1.35677	2.56959	2.15111	0.68825		0.410733	-0.95575	-0.931326	2.15111	-0.272509	0.609892
GCAAAGACTTCACTTTCAATA	1700029J11Rik	TRCN0000267036	3.16624	2.97426	3.73393	2.58975		1.66133	2.87735	2.71133	1.5049	0.288883	0.454911	0.749566	0.659388		2.532	1.60112	3.41813	0.442256	1.37314	-0.443872	0.457175	0.908599		0.48351	5.34389	2.15987	3.25042	-1.60995	1.57406	1.07151	2.46885		1.17635	0.385015	2.47215	1.4134	2.20473	0.117596	1.24524	1.05368		0.749566	0.457175	1.07151	1.24524	0.603371	1.15838
TCGAGATGGAATTGGTGAAAT	1700029J11Rik	TRCN0000267039	2.86608	3.09979	2.64639	3.22396		2.51124	3.72078	3.4522	0.354839	-0.854697	-0.586115	-0.361991	0.635152		4.05766	1.86297	1.29645	-0.957866	1.23682	1.80334	0.6941	1.45842		2.48846	4.63407	3.48694	0.157924	-1.98768	-0.840553	-0.890104	1.07366		0.28586	2.38246	1.81341	2.9381	0.841498	1.41054	1.73005	1.0842		-0.361991	0.6941	-0.890104	1.73005	0.166055	0.419972
ACTTCCGGATTAGACAGAATC	1700029J11Rik	TRCN0000267040	2.05152	1.92078	1.58084	1.50328		0.119719	1.48806	0.952531	1.9318	0.563452	1.09899	1.19808	0.689533		0.252597	0.737544	0.901603	1.66818	1.18324	1.01918	1.2902	0.337465		1.53165	0	0	0.0491885	1.58084	1.58084	1.07029	0.8843		0	0	0	1.50328	1.50328	1.50328	1.50328	0		1.19808	1.2902	1.07029	1.50328	1.24414	1.28679
TTCGAGGAGATGGCGAGAATA	1700029J11Rik	TRCN0000267038	0.907296	1.05078	1.38131	0.465528		1.5378	0.27572	0.905284	-0.630505	0.631577	0.00201204	0.00102785	0.631042		1.80221	0.791515	0.765631	-0.751436	0.259262	0.285146	-0.0690091	0.591141		2.31655	1.889	0.830287	-0.935246	-0.50769	0.551021	-0.297305	0.765143		0.655566	0.626462	0.332129	-0.190039	-0.160934	0.133399	-0.0725246	0.178928		0.00102785	-0.0690091	-0.297305	-0.0725246	-0.0339906	-0.184915
GCCCATCTCATTCACTGTGTT	1700029M20Rik	TRCN0000184593	3.75322	3.56795	4.19602	3.7767		3.3217	3.56079	2.90391	0.431513	0.192422	0.84931	0.491082	0.332471		2.48347	3.26003	1.57934	1.08449	0.307922	1.98862	1.12701	0.841154		2.6497	3.06295	2.36444	1.54632	1.13307	1.83157	1.50365	0.351202		2.9418	1.60367	1.12658	0.834899	2.17303	2.65012	1.88601	0.941029		0.491082	1.12701	1.50365	1.88601	0.809045	1.69483
CATCCCAATCTTACCATACTT	1700029M20Rik	TRCN0000183807	3.66377	3.21527	3.30989	4.41895		4.38147	3.16553	4.06285	-0.717706	0.498235	-0.399085	-0.206185	0.630505		4.03089	4.51495	4.13115	-0.815615	-1.29968	-0.915877	-1.01039	0.255498		2.43636	3.69454	3.02935	0.873534	-0.384647	0.280536	0.256474	0.629436		4.51641	3.54493	5.3697	-0.0974595	0.874025	-0.950746	-0.0580599	0.913023		-0.206185	-1.01039	0.256474	-0.0580599	-0.608288	0.0992073
CCGCGGTTTCTTAATGTAGTA	1700029M20Rik	TRCN0000179076	3.29097	3.61918	3.34829	3.39038		3.14953	3.28166	3.90368	0.141444	0.00930721	-0.612706	-0.153985	0.402721		3.45792	3.24076	2.69173	0.161261	0.378419	0.927447	0.489042	0.39489		4.10915	2.92643	2.74537	-0.760854	0.421865	0.602921	0.0879774	0.740662		3.90664	1.89487	3.06338	-0.516253	1.49552	0.327004	0.435423	1.01026		-0.153985	0.489042	0.0879774	0.435423	0.167529	0.2617
CAAGAGTGGTTTCCTACCTAT	1700029M20Rik	TRCN0000179033	3.90458	3.76277	4.40071	2.9608		3.79918	3.97653	3.94222	0.105407	-0.0719505	-0.0376419	-0.00139526	0.0940705		4.25563	3.92645	3.12122	-0.492857	-0.163675	0.641549	-0.00499439	0.583613		3.12058	3.98544	4.73568	1.28013	0.415268	-0.334969	0.453475	0.808225		4.02788	4.32424	1.81341	-1.06708	-1.36344	1.14739	-0.427711	1.3721		-0.00139526	-0.00499439	0.453475	-0.427711	-0.00319483	0.012882
GAACCCACACTTCCATGGTTA	1700029P11Rik	TRCN0000188840	4.00997	3.11177	2.61873	3.95152		3.83168	4.02533	3.3892	0.178285	-0.0153578	0.620769	0.261232	0.326074		3.24731	4.19025	2.56091	-0.135543	-1.07848	0.550858	-0.221056	0.81803		2.64205	3.20744	1.55832	-0.0233237	-0.588711	1.06041	0.14946	0.838029		1.40246	2.3052	2.25462	2.54905	1.64632	1.69689	1.96409	0.507226		0.261232	-0.221056	0.14946	1.96409	0.0200879	1.05677
GAAGGTGGATGCCTTGAATAT	1700029P11Rik	TRCN0000187895	4.67875	4.26974	4.17243	4.85319		1.02735	0.239413	0.905284	3.6514	4.43934	3.77347	3.95473	0.424094		1.8942	0.212743	0.477225	2.37553	4.057	3.79251	3.40835	0.904166		0	0.249307	0	4.17243	3.92312	4.17243	4.08933	0.143937		0	0	0	4.85319	4.85319	4.85319	4.85319	0		3.95473	3.40835	4.08933	4.85319	3.68154	4.47126
CGCCGTCTTCTTCTTTGGTTT	1700029P11Rik	TRCN0000189368	4.03872	3.52383	3.89248	4.29467		4.36541	4.39485	4.47851	-0.326693	-0.356129	-0.43979	-0.374204	0.0586752		4.14451	4.62866	4.50128	-0.620683	-1.10483	-0.977451	-0.900989	0.250968		3.25702	5.59912	4.39469	0.635466	-1.70664	-0.502204	-0.524458	1.17121		3.14756	4.07069	4.52612	1.14711	0.223985	-0.231453	0.379882	0.702381		-0.374204	-0.900989	-0.524458	0.379882	-0.637597	-0.0722883
CCCAAGGGATTGAAAGAAGAA	1700029P11Rik	TRCN0000188106	4.37038	4.02581	3.61648	4.52472		4.4013	4.68201	4.03019	-0.0309144	-0.311628	0.340195	-0.000782482	0.326954		3.53138	4.72195	4.37262	0.494426	-0.696139	-0.346808	-0.18284	0.611985		3.92288	3.68751	2.74537	-0.306402	-0.0710356	0.871108	0.164557	0.623106		3.55644	3.68494	4.01456	0.968278	0.839779	0.510154	0.772737	0.236305		-0.000782482	-0.18284	0.164557	0.772737	-0.0918112	0.468647
GCTCTCTTGCTTTATTTGTAT	1700029P11Rik	TRCN0000185455	5.02608	4.5938	4.77266	4.50286		5.4202	5.06575	5.85148	-0.394118	-0.0396691	-0.825399	-0.419729	0.393491		5.53092	6.19876	5.63273	-0.937112	-1.60496	-1.03893	-1.19366	0.359808		5.36384	5.15313	6.66437	-0.591182	-0.380468	-1.89171	-0.954454	0.818497		5.47658	4.69742	7.84379	-0.973722	-0.194565	-3.34094	-1.50307	1.63862		-0.419729	-1.19366	-0.954454	-1.50307	-0.806697	-1.22876
CGAGACCCATGAGGACTACAA	1700030C10Rik	TRCN0000093246	2.26122	1.83671	2.20983	1.95363		1.27096	1.68989	1.35545	0.990258	0.571327	0.905763	0.822449	0.221544		2.22463	2.04062	2.73485	-0.387921	-0.203911	-0.898142	-0.496658	0.359662		0.996644	0.526219	2.73135	1.21319	1.68361	-0.521523	0.791759	1.1614		0.439461	0.88725	0.332129	1.51417	1.06638	1.6215	1.40068	0.294448		0.822449	-0.496658	0.791759	1.40068	0.162895	1.09622
GCAGGAGGATACCAAATTCAA	1700030J22Rik	TRCN0000177974	4.1822	2.93437	3.45772	3.3712		2.90482	3.52354	3.30069	1.27738	0.658667	0.881518	0.939188	0.313362		2.74464	2.86632	2.64728	0.189726	0.0680477	0.287086	0.18162	0.109744		0.0926903	2.77562	1.57411	3.36503	0.682097	1.88361	1.97691	1.3439		0.0389869	0.140069	1.78273	3.33222	3.23114	1.58847	2.71728	0.978877		0.939188	0.18162	1.97691	2.71728	0.560404	2.34709
GCTTGTGCAGATGGACTGAAA	1700030J22Rik	TRCN0000181532	3.50388	3.68477	3.73393	3.97712		4.37346	3.7404	2.91587	-0.869582	-0.236516	0.588007	-0.172697	0.730888		3.29871	3.08199	2.18795	0.386056	0.60278	1.49682	0.828551	0.588793		2.14319	2.36457	3.36967	1.59074	1.36936	0.364261	1.10812	0.653643		2.73179	1.94666	1.99837	1.24533	2.03045	1.97874	1.75151	0.439126		-0.172697	0.828551	1.10812	1.75151	0.327927	1.42982
GCAGTCTAACAAACTCTGCAT	1700030J22Rik	TRCN0000198478	4.20267	4.6646	4.13631	4.95654		4.09537	4.53249	4.01636	0.107308	-0.32982	0.186315	-0.0120658	0.278004		4.82789	4.50287	4.64708	-0.163284	0.161729	0.0175229	0.00532255	0.16285		3.1586	3.21723	4.88243	0.977708	0.919084	-0.746121	0.383557	0.978769		3.29978	3.18407	3.71884	1.65676	1.77247	1.2377	1.55564	0.281361		-0.0120658	0.00532255	0.383557	1.55564	-0.00337162	0.9696
GCATATTATCACAGAGGCCAA	1700030J22Rik	TRCN0000198321	4.73253	4.69277	4.98794	4.46491		4.97792	4.40922	3.55909	-0.245386	0.323314	1.17344	0.417123	0.714051		4.3561	4.71149	4.85821	0.336669	-0.018715	-0.165435	0.0508399	0.258177		3.93232	3.74953	3.20699	1.05562	1.23841	1.78095	1.35833	0.377238		4.29675	4.26682	4.22034	0.168158	0.198092	0.244573	0.203607	0.0385052		0.417123	0.0508399	1.35833	0.203607	0.233982	0.780967
GCTGTATTTGAACTCAGATTT	1700030J22Rik	TRCN0000197852	5.08378	5.12367	5.36822	5.10324		5.23926	4.97758	5.12722	-0.155483	0.1062	-0.0434436	-0.0309089	0.131291		3.97581	5.32391	5.35426	1.14786	-0.200244	-0.23059	0.239008	0.787234		5.95455	5.91395	5.26222	-0.586323	-0.54573	0.106006	-0.342016	0.388529		3.6941	4.49051	3.77058	1.40915	0.612729	1.33266	1.11818	0.4394		-0.0309089	0.239008	-0.342016	1.11818	0.104049	0.388082
CCAGAAGTCAGAACCATTACT	1700034E13Rik	TRCN0000192254	3.60346	4.18727	3.82449	4.09579		2.9214	4.26767	3.3892	0.682066	-0.66421	0.214261	0.0773722	0.683498		3.0075	3.43978	3.68638	1.17978	0.7475	0.500895	0.809391	0.343648		2.00692	1.49747	0.133899	1.81757	2.32702	3.69059	2.61173	0.968425		1.5311	1.46846	1.54746	2.56469	2.62733	2.54832	2.58011	0.0416983		0.0773722	0.809391	2.61173	2.58011	0.443382	2.59592
CCTAAAGAACTAAGGAGACCA	1700034E13Rik	TRCN0000201137	3.89518	4.46905	4.08417	4.66323		3.93867	4.17219	4.81845	-0.0434886	-0.277014	-0.923272	-0.414592	0.455742		4.65678	5.13982	5.4199	-0.187728	-0.670771	-0.950853	-0.603117	0.386035		5.54801	5.97868	2.91619	-1.46384	-1.89451	1.16798	-0.730121	1.65785		3.57314	4.42811	3.22045	1.09009	0.235123	1.44278	0.922664	0.620992		-0.414592	-0.603117	-0.730121	0.922664	-0.508854	0.0962715
CCAAATCTATTAGCATTCATG	1700034E13Rik	TRCN0000191004	4.51244	4.72431	5.09093	5.27044		5.05629	5.45621	4.80564	-0.543854	-0.943769	-0.293205	-0.59361	0.328123		5.11911	5.11358	5.38455	-0.394804	-0.389267	-0.660246	-0.481439	0.154876		4.32274	5.14032	6.68087	0.768189	-0.0493947	-1.58995	-0.290384	1.1974		2.00473	9.39578	3.45259	3.26571	-4.12534	1.81784	0.319403	3.91675		-0.59361	-0.481439	-0.290384	0.319403	-0.537525	0.0145099
GAGAACAATCTGTTGCCTAAA	1700034E13Rik	TRCN0000191828	4.67143	5.0035	5.041	4.63938		5.50144	4.83127	4.19642	-0.830015	-0.159841	0.47501	-0.171615	0.652592		5.12545	4.77817	4.98737	-0.121953	0.225334	0.0161348	0.0398386	0.174852		5.17138	3.71541	3.56014	-0.13038	1.3256	1.48086	0.892027	0.888827		5.20384	2.33466	7.3793	-0.564457	2.30472	-2.73992	-0.33322	2.53026		-0.171615	0.0398386	0.892027	-0.33322	-0.0658883	0.279403
CTTGACGCCTTAAACGAAGCT	1700034E13Rik	TRCN0000201922	0	0.28016	0.123228	0.18711		0	0.0427639	0.284785	0	-0.0427639	-0.284785	-0.109183	0.153571		0.0541816	0.0451324	0	0.225978	0.235027	0.28016	0.247055	0.0290243		0.136894	0	0	-0.0136659	0.123228	0.123228	0.0775967	0.0790357		0	0	0	0.18711	0.18711	0.18711	0.18711	0		-0.109183	0.247055	0.0775967	0.18711	0.068936	0.132353
GCTATATTTAACACCAGTCAA	1700034F02Rik	TRCN0000089468	4.14037	3.98082	3.97115	4.47168		4.13853	3.81631	3.65504	0.00184227	0.324064	0.485331	0.270413	0.246169		4.68065	4.93326	5.17239	-0.699833	-0.952441	-1.19157	-0.947949	0.245901		3.71626	2.9501	3.72129	0.25489	1.02105	0.249852	0.508597	0.443804		4.06849	1.98432	1.90173	0.403193	2.48736	2.56995	1.82016	1.22783		0.270413	-0.947949	0.508597	1.82016	-0.338768	1.16438
GCATCTTGTGATGAGTGATTT	1700034F02Rik	TRCN0000089471	4.13772	3.9611	4.37614	4.10162		4.41111	3.6007	3.81058	-0.273394	0.537019	0.327134	0.19692	0.420606		2.61546	3.64793	2.99007	1.34565	0.31317	0.971033	0.876616	0.522673		3.22153	3.10573	3.00042	1.1546	1.27041	1.37571	1.26691	0.110597		2.75539	1.33878	3.02457	1.34623	2.76284	1.07705	1.72871	0.905644		0.19692	0.876616	1.26691	1.72871	0.536768	1.49781
GCTGATGAATATTACACCATA	1700034F02Rik	TRCN0000089472	3.79763	4.06944	3.4771	2.88169		3.817	3.37666	3.48068	-0.0193707	0.42097	0.316948	0.239516	0.230156		1.81796	3.62953	2.31517	2.25148	0.439908	1.75426	1.48188	0.935997		3.81479	2.74888	2.74537	-0.337684	0.728222	0.731731	0.374089	0.616417		1.9341	2.33466	1.02537	0.947591	0.547027	1.85632	1.11698	0.670881		0.239516	1.48188	0.374089	1.11698	0.8607	0.745535
GCCATCAAAGACTGCAGGTTA	1700034F02Rik	TRCN0000089470	3.39692	4.09379	3.08074	4.09579		4.15731	4.14792	4.14903	-0.76039	-0.750999	-0.752119	-0.754503	0.00512942		3.15735	3.20143	3.39911	0.936439	0.892358	0.694678	0.841158	0.128756		5.01289	4.20791	5.56554	-1.93215	-1.12717	-2.4848	-1.84804	0.682712		3.59292	3.61463	2.10143	0.502864	0.481158	1.99436	0.992795	0.86745		-0.754503	0.841158	-1.84804	0.992795	0.0433278	-0.427624
GCCTCTTCCATTACTCTTGTT	1700034F02Rik	TRCN0000089469	4.1562	4.3926	4.09425	3.96437		3.18198	3.73715	4.04661	0.974219	0.419054	0.109589	0.500954	0.438095		3.72335	3.37938	3.86614	0.669242	1.01322	0.526459	0.736306	0.250213		4.89879	3.36542	3.23707	-0.804541	0.728833	0.857182	0.260491	0.924575		3.79434	3.92658	4.56946	0.170031	0.0377946	-0.605088	-0.132421	0.414648		0.500954	0.736306	0.260491	-0.132421	0.61863	0.0640353
GCGATCTTCAAAGAACTGTTT	1700034H14Rik	TRCN0000175917	5.18241	5.54166	5.53934	5.06794		4.80711	4.81748	4.67088	0.375297	0.364932	0.511529	0.417253	0.0818097		5.30935	4.99207	5.18355	0.232313	0.549591	0.358104	0.380003	0.159769		5.83972	4.8413	4.58793	-0.300379	0.698046	0.951414	0.449694	0.66182		2.4502	2.57578	4.10105	2.61774	2.49216	0.966891	2.0256	0.919013		0.417253	0.380003	0.449694	2.0256	0.398628	1.23765
CGTCCAGCCCTAATATCATAT	1700034H14Rik	TRCN0000173687	4.38837	4.75517	4.32357	4.48066		5.43567	4.8419	5.2646	-1.0473	-0.453534	-0.876236	-0.792357	0.305641		5.06736	4.96296	4.07233	-0.312189	-0.207796	0.682843	0.0542863	0.546843		3.34914	3.84731	2.59092	0.974426	0.476258	1.73265	1.06111	0.632663		5.49334	4.20701	4.38004	-1.01269	0.273641	0.10062	-0.212809	0.698096		-0.792357	0.0542863	1.06111	-0.212809	-0.369035	0.424151
GTTTGGATCAACTGAGGTCTT	1700034H14Rik	TRCN0000173346	4.33837	3.12364	4.27788	3.36637		4.10265	4.65986	4.16667	0.235716	-0.321496	0.171693	0.0286377	0.30491		4.6871	4.28266	3.58566	-1.56346	-1.15902	-0.462016	-1.0615	0.557159		4.39732	5.3077	4.89977	-0.119442	-1.02982	-0.621892	-0.590385	0.456007		4.67178	3.35194	3.85042	-1.30541	0.0144329	-0.484053	-0.591676	0.66647		0.0286377	-1.0615	-0.590385	-0.591676	-0.51643	-0.591031
CAAGTGTCTATTCGCAGAAAT	1700034H14Rik	TRCN0000175314	3.89832	3.69276	4.59243	3.64715		4.27803	3.9374	4.89754	-0.379714	-0.0390845	-0.999218	-0.472672	0.48677		4.93103	4.51295	4.30882	-1.23827	-0.820187	-0.616055	-0.891503	0.317178		4.94769	4.54361	4.73392	-0.355265	0.0488152	-0.141493	-0.149314	0.202153		4.00837	5.98714	6.10561	-0.361221	-2.34	-2.45846	-1.71989	1.17814		-0.472672	-0.891503	-0.149314	-1.71989	-0.682088	-0.934604
GCCAGTTTGAATTTCGATACA	1700034H14Rik	TRCN0000176229	4.72371	4.60232	4.07148	3.85472		4.34098	4.37825	5.0533	0.382725	0.34546	-0.32959	0.132865	0.400931		4.12249	4.18774	4.69933	0.479824	0.414579	-0.0970157	0.265796	0.315893		4.62582	5.39652	4.62631	-0.554344	-1.32505	-0.554834	-0.811408	0.444824		3.07906	4.68031	2.49125	0.775657	-0.825592	1.36347	0.437844	1.13295		0.132865	0.265796	-0.811408	0.437844	0.199331	-0.186782
CCTCATCTTCTTCAATCAAAT	1700034I23Rik	TRCN0000182966	4.42803	4.30666	5.44011	4.4918		6.56625	6.55265	6.35964	-2.13822	-2.12462	-1.93161	-2.06482	0.11556		6.58763	7.00233	6.79553	-2.28096	-2.69566	-2.48887	-2.4885	0.207352		5.8347	6.98019	5.83991	-0.394585	-1.54007	-0.399799	-0.778152	0.659848		6.5097	5.50092	6.95892	-2.0179	-1.00912	-2.46712	-1.83138	0.746683		-2.06482	-2.4885	-0.778152	-1.83138	-2.27666	-1.30477
GCCAGAACACAATGACACTAA	1700034I23Rik	TRCN0000179563	4.29851	4.06944	4.41485	4.27932		4.03826	4.05174	3.50861	0.260243	0.246766	0.789895	0.432301	0.309759		4.26427	4.57389	4.03091	-0.194837	-0.504454	0.0385284	-0.220254	0.272382		5.62471	2.9963	3.43599	-1.20986	1.41855	0.978855	0.395846	1.40786		3.48765	4.09097	4.1738	0.791671	0.188352	0.10552	0.361848	0.374535		0.432301	-0.220254	0.395846	0.361848	0.106023	0.378847
GAGGCACTGGATCTTACAGAA	1700034I23Rik	TRCN0000184223	4.15357	4.42174	4.42686	4.90912		3.68735	4.45941	3.60047	0.466227	-0.30583	0.553109	0.237835	0.472828		3.68523	4.74607	3.71127	0.73651	-0.324324	0.710472	0.374219	0.605096		5.19379	5.58973	4.24979	-0.766928	-1.16287	0.177069	-0.584243	0.688396		5.09935	2.96295	3.35168	-0.190236	1.94617	1.55744	1.10446	1.13796		0.237835	0.374219	-0.584243	1.10446	0.306027	0.260107
GAGTCGAGTAGAGAAGGACAT	1700034I23Rik	TRCN0000184572	2.80045	2.28034	1.16888	0.816923		0	0.476237	0.32124	2.80045	2.32421	2.47921	2.53462	0.242906		0.106402	0.0451324	0	2.17394	2.23521	2.28034	2.22983	0.0534045		1.29857	0.861893	1.07192	-0.129693	0.306985	0.0969627	0.0914183	0.218391		0.0389869	0	0	0.777936	0.816923	0.816923	0.803927	0.0225091		2.53462	2.22983	0.0914183	0.803927	2.38222	0.447673
GACATGCTACTTCATAATCTT	1700040L02Rik	TRCN0000200808	4.20013	4.62338	4.64308	3.7948		0.830833	3.20372	2.60445	3.3693	0.996411	1.59568	1.98713	1.23393		2.60642	1.2997	3.28354	2.01696	3.32367	1.33984	2.22682	1.00843		0.221434	0.461813	0	4.42164	4.18126	4.64308	4.41533	0.230971		1.30986	0.0948736	0.102944	2.48494	3.69993	3.69186	3.29224	0.699154		1.98713	2.22682	4.41533	3.29224	2.10698	3.85379
GCTCAACTTCAGAGAAACAAA	1700040L02Rik	TRCN0000200859	5.14852	4.21529	5.13674	5.05147		5.23596	4.73676	4.63151	-0.0874349	0.411763	0.517015	0.280448	0.322913		4.05766	3.9739	3.84661	0.15763	0.241388	0.368679	0.255899	0.10627		3.67188	2.74888	2.79339	1.46487	2.38786	2.34336	2.06536	0.520521		2.65857	4.44171	5.02273	2.3929	0.609757	0.0287395	1.01046	1.23196		0.280448	0.255899	2.06536	1.01046	0.268173	1.53791
CGCACGAATAGAGAAACTGAA	1700040L02Rik	TRCN0000192251	3.36549	3.78537	3.48861	4.09287		5.03614	4.44353	4.05205	-1.67066	-1.07805	-0.686559	-1.14509	0.495462		3.41197	3.89905	4.42997	0.3734	-0.113678	-0.644599	-0.128292	0.509157		3.35383	2.53076	4.9169	0.134777	0.957845	-1.42829	-0.11189	1.21204		3.34715	3.24222	4.17084	0.745716	0.850645	-0.0779744	0.506129	0.508562		-1.14509	-0.128292	-0.11189	0.506129	-0.63669	0.197119
CTGGACATGCTACTTCATAAT	1700040L02Rik	TRCN0000191344	2.13909	2.53274	2.24644	1.87411		1.10678	1.87876	1.8049	1.0323	0.260322	0.33419	0.542272	0.425984		1.73746	1.9838	0.765631	0.79528	0.548934	1.76711	1.03711	0.644085		0.301294	0.646999	0	1.94515	1.59944	2.24644	1.93034	0.323753		0.113936	1.95933	0.373899	1.76018	-0.0852149	1.50021	1.05839	0.998885		0.542272	1.03711	1.93034	1.05839	0.789689	1.49437
GCTTTCTTTACCTTGCTGTTT	1700042B14Rik	TRCN0000091410	4.24276	4.21529	4.52511	3.95796		5.51879	5.05665	5.06678	-1.27603	-0.813891	-0.824017	-0.971311	0.263939		5.65335	4.8419	5.79652	-1.43806	-0.62661	-1.58123	-1.2153	0.51482		2.36382	2.87789	3.34687	2.1613	1.64723	1.17825	1.66226	0.491698		4.64201	3.82645	4.11035	-0.684054	0.13151	-0.152386	-0.234976	0.414007		-0.971311	-1.2153	1.66226	-0.234976	-1.0933	0.71364
GCCAGCAAAGATAATGAGTAT	1700042B14Rik	TRCN0000091538	3.24236	3.93439	3.19284	3.35665		3.88898	4.0751	4.89452	-0.646616	-0.832741	-1.65215	-1.04384	0.534974		3.89275	4.17256	5.45348	0.0416319	-0.238178	-1.5191	-0.571881	0.832158		4.45956	4.21281	3.2321	-1.26672	-1.01997	-0.0392558	-0.775314	0.649274		3.07906	0.493474	1.28822	0.277587	2.86318	2.06843	1.7364	1.32439		-1.04384	-0.571881	-0.775314	1.7364	-0.807859	0.480542
CCTGCAATCCTTTCAGACTTT	1700042B14Rik	TRCN0000091541	2.18096	2.19287	2.29093	4.66126		0	0	0	2.18096	2.18096	2.18096	2.18096	0		0.106402	0	0	2.08647	2.19287	2.19287	2.15741	0.0614311		0	0	0	2.29093	2.29093	2.29093	2.29093	0		1.63654	0	0	3.02472	4.66126	4.66126	4.11575	0.944857		2.18096	2.15741	2.29093	4.11575	2.16918	3.20334
CCTTCCCACCATCTTTCAATT	1700042B14Rik	TRCN0000091636	2.66686	2.68475	1.90092	2.79078		1.92509	3.38083	2.28267	0.741772	-0.713972	0.384193	0.137331	0.758619		1.92361	2.51175	1.97837	0.761136	0.172992	0.706375	0.546835	0.324913		0.645271	1.13402	2.56744	1.25565	0.766903	-0.666521	0.452011	0.999027		0.928988	0	0.67057	1.8618	2.79078	2.12021	2.2576	0.47949		0.137331	0.546835	0.452011	2.2576	0.342083	1.3548
CTTTCTACTAAGTGGCACAAT	1700042B14Rik	TRCN0000091491	3.01819	3.89336	3.83655	4.18086		3.22267	5.07866	4.17914	-0.204476	-2.06047	-1.16095	-1.14196	0.928141		2.84794	3.72623	3.89901	1.04541	0.167128	-0.00564929	0.402297	0.563615		3.5828	4.22741	3.4186	0.253746	-0.390865	0.417946	0.0936092	0.427524		3.76557	3.21608	2.3623	0.41529	0.964788	1.81856	1.06621	0.707112		-1.14196	0.402297	0.0936092	1.06621	-0.369834	0.579911
GATGGCTCCATTCCTTTGTAT	1700042B14Rik	TRCN0000091634	3.23244	3.83677	4.20999	3.0358		2.02047	2.65421	2.82993	1.21197	0.57823	0.402513	0.730904	0.425779		2.06226	2.59757	1.56575	1.77451	1.2392	2.27102	1.76158	0.516033		1.77485	1.25298	0	2.43514	2.95701	4.20999	3.20071	0.912177		0.0389869	4.15567	2.15032	2.99681	-1.11987	0.88548	0.920808	2.05857		0.730904	1.76158	3.20071	0.920808	1.24624	2.06076
CACCAGAGTATGTTACCAATA	1700042B14Rik	TRCN0000091542	3.42332	2.77786	3.36087	3.23461		2.07086	2.34812	2.58209	1.35246	1.0752	0.841227	1.08963	0.255922		1.50435	4.11552	2.53326	1.27351	-1.33766	0.244599	0.06015	1.31532		0.675555	2.89018	0.332675	2.68531	0.470691	3.02819	2.0614	1.38822		1.41734	3.63451	2.61833	1.81727	-0.399897	0.616276	0.677884	1.10987		1.08963	0.06015	2.0614	0.677884	0.574889	1.36964
CCAGAGTATGTTACCAATACA	1700042B14Rik	TRCN0000091637	4.03872	2.53274	4.23069	2.25508		3.96289	4.55298	5.1778	0.075834	-0.514259	-1.13908	-0.525836	0.607542		4.82399	4.15208	3.68638	-2.29126	-1.61934	-1.15364	-1.68808	0.571913		4.71235	2.90236	3.34226	-0.48166	1.32833	0.888428	0.578366	0.943992		5.84986	2.8788	2.76682	-3.59478	-0.623718	-0.511743	-1.57675	1.74856		-0.525836	-1.68808	0.578366	-1.57675	-1.10696	-0.49919
CCACCATCTTTCAATTTGCCT	1700042B14Rik	TRCN0000091635	2.9411	2.79281	2.99728	2.22334		3.31754	3.47362	2.81722	-0.376439	-0.53252	0.123874	-0.261695	0.342911		3.66361	3.80706	3.84661	-0.870803	-1.01425	-1.0538	-0.97962	0.0962901		4.06693	5.38137	1.99367	-1.06965	-2.38409	1.00361	-0.816712	1.70796		3.09302	1.7566	0.529847	-0.869681	0.466741	1.6935	0.430185	1.28198		-0.261695	-0.97962	-0.816712	0.430185	-0.620657	-0.193263
GCCATGGCTTTGGCAATTATA	1700042B14Rik	TRCN0000091540	1.2982	0.89322	0.776822	0.816923		0.807248	1.23502	1.28337	0.490948	0.0631787	0.0148243	0.18965	0.262049		0.881226	0.989222	1.59279	0.0119941	-0.0960023	-0.699573	-0.261194	0.383468		0.448861	1.56034	0.539885	0.327961	-0.783519	0.236938	-0.0728735	0.617118		0.379968	0.226422	0.199029	0.436955	0.590501	0.617894	0.54845	0.0975244		0.18965	-0.261194	-0.0728735	0.54845	-0.0357716	0.237788
CCAGCAAAGATAATGAGTATT	1700042B14Rik	TRCN0000091633	3.61496	3.56795	3.98475	3.54815		3.97087	4.34018	4.2062	-0.355905	-0.725218	-0.591233	-0.557452	0.186959		5.03741	4.25891	4.36283	-1.46946	-0.690956	-0.79488	-0.985098	0.422674		4.38363	4.6808	5.39708	-0.398873	-0.696044	-1.41233	-0.835748	0.520969		4.9295	3.21608	3.85042	-1.38136	0.33207	-0.302276	-0.450521	0.866279		-0.557452	-0.985098	-0.835748	-0.450521	-0.771275	-0.643134
TGCCTCTGAGGCCACAAACAT	1700042G07Rik	TRCN0000267064	2.14967	2.4217	2.34257	3.91225		1.67443	1.25334	1.45724	0.475239	0.896327	0.692427	0.687998	0.210579		1.58016	2.23818	1.40723	0.841537	0.183523	1.01448	0.679845	0.438439		0.818117	0	0	1.52445	2.34257	2.34257	2.06986	0.47234		0.0769479	2.4998	0.703706	3.8353	1.41245	3.20854	2.81876	1.25758		0.687998	0.679845	2.06986	2.81876	0.683921	2.44431
GCAGGACATACCGGCAGAAAC	1700042G07Rik	TRCN0000267066	2.67421	0.716321	3.18343	3.46465		1.903	1.64895	0.905284	0.771202	1.02525	1.76892	1.18846	0.518496		0.0541816	0.843539	0.944221	0.66214	-0.127218	-0.2279	0.102341	0.487407		0.221434	1.39772	3.04644	2.962	1.78572	0.136995	1.62824	1.41907		1.95463	0	0.971968	1.51002	3.46465	2.49268	2.48912	0.977321		1.18846	0.102341	1.62824	2.48912	0.6454	2.05868
CTACCACCAGTGTATTGATTC	1700042G07Rik	TRCN0000267062	1.40805	2.00022	0.986127	2.22334		2.56848	1.87876	2.37226	-1.16043	-0.470719	-0.964214	-0.865122	0.355375		1.58016	1.61615	2.01881	0.420055	0.384068	-0.0185909	0.261844	0.243529		0.261916	0.394397	0	0.724211	0.59173	0.986127	0.767356	0.200707		1.92372	0.307896	0.636655	0.299625	1.91545	1.58669	1.26725	0.853961		-0.865122	0.261844	0.767356	1.26725	-0.301639	1.0173
GGTGTCCCAGTATGTTCAAGT	1700042G07Rik	TRCN0000267063	2.64459	2.05085	1.41386	2.2655		2.42089	3.25917	0.753485	0.223695	-0.614586	1.8911	0.50007	1.2755		2.51278	1.1834	0.588883	-0.461937	0.867447	1.46197	0.622492	0.985065		1.67345	1.73401	3.93513	-0.259595	-0.320149	-2.52127	-1.03367	1.28865		0	0	2.11381	2.2655	2.2655	0.151697	1.5609	1.22041		0.50007	0.622492	-1.03367	1.5609	0.561281	0.263615
GCTTGACTTCTCCCTACCGAA	1700042G07Rik	TRCN0000267065	2.18096	1.00015	1.20653	1.21137		0.365594	0.379459	0	1.81536	1.8015	2.18096	1.9326	0.21519		0.618971	2.53567	2.95923	0.381175	-1.53552	-1.95909	-1.03781	1.24699		2.4713	4.63407	0.0460276	-1.26478	-3.42754	1.1605	-1.17727	2.29527		2.30581	0.307896	1.54746	-1.09445	0.90347	-0.336098	-0.175692	1.00857		1.9326	-1.03781	-1.17727	-0.175692	0.447396	-0.676483
CGCCTCAACTCACCAGAAATT	1700045I19Rik	TRCN0000041104	2.01726	2.12361	2.82038	2.14646		2.7892	3.09108	2.31013	-0.771939	-1.07382	-0.292876	-0.71288	0.39381		2.25964	1.99535	2.29061	-0.136035	0.12826	-0.167003	-0.0582589	0.162271		2.11031	0.461813	2.41793	0.710073	2.35857	0.402449	1.15703	1.05187		0.0389869	2.13704	0.529847	2.10747	0.00941875	1.61661	1.2445	1.09741		-0.71288	-0.0582589	1.15703	1.2445	-0.385569	1.20077
CGTCTTATACTGAAGATGATT	1700045I19Rik	TRCN0000041103	1.04969	0.777729	1.279	0.872541		0.985938	2.05622	0.753485	0.0637554	-1.00653	0.296208	-0.215523	0.694824		3.04142	2.36818	2.60142	-2.26369	-1.59045	-1.82369	-1.89261	0.341871		1.5964	3.17767	0.133899	-0.317403	-1.89867	1.1451	-0.356992	1.52227		2.33743	1.45063	1.30991	-1.46489	-0.578093	-0.437365	-0.826784	0.557081		-0.215523	-1.89261	-0.356992	-0.826784	-1.05407	-0.591888
CATCAGTTTGATTACGGAGAT	1700045I19Rik	TRCN0000041106	3.31467	3.54164	3.83955	3.36152		3.37882	4.3251	3.09499	-0.0641472	-1.01043	0.219682	-0.284965	0.644099		4.61683	4.62495	4.26955	-1.07519	-1.08331	-0.727913	-0.962138	0.202885		4.33939	4.34367	6.53215	-0.499837	-0.504124	-2.6926	-1.23219	1.26476		1.57155	2.91175	3.39797	1.78997	0.44977	-0.0364471	0.734432	0.945899		-0.284965	-0.962138	-1.23219	0.734432	-0.623551	-0.248878
GCGCGTTGAACTCTATCGTAT	1700045I19Rik	TRCN0000041105	0.36943	0.652183	0.272694	0.0965863		0	0.0842967	0.0872605	0.36943	0.285134	0.28217	0.312244	0.0495464		0.618971	0	0	0.0332118	0.652183	0.652183	0.445859	0.357363		0.0926903	0	0	0.180003	0.272694	0.272694	0.241797	0.0535148		0.496597	0	0	-0.400011	0.0965863	0.0965863	-0.068946	0.28671		0.312244	0.445859	0.241797	-0.068946	0.379052	0.0864254
GATGATTTCTACTGTCCGATA	1700045I19Rik	TRCN0000041107	3.88572	3.21527	3.58823	2.9608		3.79318	3.18952	3.94806	0.0925313	0.696199	-0.0623475	0.242128	0.40079		3.34834	1.55506	3.05471	-0.133071	1.66022	0.160567	0.562571	0.961861		2.70947	3.2462	3.2954	0.878768	0.342038	0.292838	0.504548	0.325017		2.97736	1.6668	6.02105	-0.0165557	1.294	-3.06025	-0.594269	2.23387		0.242128	0.562571	0.504548	-0.594269	0.402349	-0.0448603
GCATGGTACTACATGCCTTTA	1700047I17Rik2	TRCN0000178297	3.13463	3.50579	3.43014	3.69421		2.63027	2.96334	4.3254	0.504358	0.171282	-1.19078	-0.171712	0.898111		3.58758	2.9984	2.14292	-0.0817807	0.507395	1.36287	0.596163	0.726407		0.448861	2.00654	2.28989	2.98127	1.4236	1.14024	1.84837	0.991299		2.98237	0.626462	1.22115	0.711843	3.06775	2.47306	2.08422	1.22514		-0.171712	0.596163	1.84837	2.08422	0.212225	1.96629
CCAGCCTTCTAAGTACCATTA	1700047I17Rik2	TRCN0000177800	3.48729	3.34266	3.32708	3.8922		3.16353	2.81087	3.1966	0.323767	0.676422	0.290688	0.430292	0.213795		3.04811	3.61464	2.49076	0.294542	-0.27198	0.851894	0.291485	0.561943		2.39145	2.49902	1.80579	0.935636	0.828064	1.52129	1.095	0.37308		3.85021	1.13061	2.87986	0.0419922	2.7616	1.01234	1.27198	1.37827		0.430292	0.291485	1.095	1.27198	0.360889	1.18349
GCAGAAAGACAATACCAACAA	1700047I17Rik2	TRCN0000177204	4.73955	4.30666	4.52139	3.89892		5.48481	5.46802	6.07008	-0.745257	-0.728468	-1.33052	-0.93475	0.342854		6.31412	6.6446	6.38373	-2.00746	-2.33794	-2.07706	-2.14082	0.174221		5.66301	5.78169	5.19742	-1.14162	-1.26031	-0.67603	-1.02599	0.308826		5.22513	5.01351	5.42539	-1.32621	-1.11459	-1.52647	-1.32242	0.205965		-0.93475	-2.14082	-1.02599	-1.32242	-1.53778	-1.1742
GCGACACGGCAGATAAGTAAT	1700047I17Rik2	TRCN0000182583	4.2624	4.28039	4.472	4.21891		3.32586	2.63338	3.65861	0.936537	1.62902	0.60379	1.05645	0.523027		3.71497	2.69283	1.79261	0.565416	1.58756	2.48778	1.54692	0.961826		1.65837	1.93717	4.44923	2.81363	2.53483	0.0227729	1.79041	1.53715		2.67103	2.64012	2.87259	1.54788	1.57879	1.34632	1.491	0.126245		1.05645	1.54692	1.79041	1.491	1.30168	1.6407
CATAGAAGATAAGGATTCCTA	1700049E17Rik1	TRCN0000176722	3.25712	2.86532	3.30989	3.57354		3.80811	3.61139	3.76499	-0.550996	-0.354272	-0.507875	-0.471048	0.103403		3.10697	3.91737	2.81167	-0.24165	-1.05205	0.0536513	-0.413349	0.572498		2.78085	2.39937	0.956154	0.529039	0.910516	2.35374	1.26443	0.962456		4.20116	3.48488	2.4625	-0.627622	0.0886581	1.11104	0.190691	0.873809		-0.471048	-0.413349	1.26443	0.190691	-0.442199	0.727561
GCAGTCAATAAGTGATACCAT	1700049E17Rik1	TRCN0000023063	3.02395	2.77786	3.64075	3.15274		3.59739	2.92956	3.10548	-0.573442	0.0943912	-0.0815279	-0.18686	0.346152		3.45792	4.06163	2.95923	-0.68006	-1.28377	-0.181375	-0.715068	0.552031		2.3451	5.67388	4.47048	1.29565	-2.03313	-0.829734	-0.522405	1.68554		2.60111	5.93199	3.33591	0.551625	-2.77926	-0.183177	-0.803603	1.74997		-0.18686	-0.715068	-0.522405	-0.803603	-0.450964	-0.663004
GACACTCAGAGACAGGGTATT	1700049L16Rik	TRCN0000190533	3.22245	3.64413	3.67808	3.43263		4.09049	3.73389	4.12087	-0.868036	-0.511435	-0.898422	-0.759298	0.215192		3.26465	2.69283	3.12586	0.379477	0.951297	0.518267	0.616347	0.298261		0.94785	2.34685	3.10197	2.73023	1.33123	0.576111	1.54586	1.09298		2.81276	3.89726	0.916516	0.61987	-0.464635	2.51611	0.890449	1.50868		-0.759298	0.616347	1.54586	0.890449	-0.0714753	1.21815
CTCAGAGACAGGGTATTGAAT	1700049L16Rik	TRCN0000192262	3.22245	3.87942	3.10087	3.67479		2.01018	2.81087	1.76575	1.21227	0.411583	1.4567	1.02685	0.546675		2.43324	2.25748	2.15204	1.44618	1.62193	1.72738	1.5985	0.142057		2.06527	1.00436	1.7373	1.0356	2.09651	1.36357	1.49856	0.543184		0.0769479	0	1.15081	3.59784	3.67479	2.52398	3.26553	0.643359		1.02685	1.5985	1.49856	3.26553	1.31267	2.38205
GCTAACACCTACAGTTGACAA	1700049L16Rik	TRCN0000192952	3.64519	3.65235	3.62345	3.57773		4.42667	3.01258	1.37292	-0.781482	0.63261	2.27227	0.707798	1.52826		1.6522	1.73109	1.34497	2.00015	1.92126	2.30738	2.07626	0.204002		0	1.25298	0	3.62345	2.37048	3.62345	3.2058	0.723407		0.0769479	5.71019	0.566335	3.50078	-2.13246	3.01139	1.4599	3.12069		0.707798	2.07626	3.2058	1.4599	1.39203	2.33285
CCAAATAGGATGGCATCCAAT	1700049L16Rik	TRCN0000201091	2.41825	2.49667	2.376	3.37602		3.16816	2.80467	2.69753	-0.749915	-0.386425	-0.279279	-0.471873	0.246679		3.57836	2.72785	3.02523	-1.08169	-0.231185	-0.528567	-0.613816	0.431615		2.1647	2.1565	2.25112	0.211297	0.219497	0.124878	0.185224	0.0524219		3.55644	4.07069	3.81674	-0.180418	-0.694662	-0.440719	-0.4386	0.257128		-0.471873	-0.613816	0.185224	-0.4386	-0.542844	-0.126688
CTCCCACAACAAAGTTCTGAA	1700049L16Rik	TRCN0000201063	3.31467	2.71645	2.73279	2.70912		4.39736	3.25917	2.89184	-1.08268	0.0555005	0.422836	-0.201449	0.784961		2.39176	3.81685	4.49233	0.324696	-1.1004	-1.77588	-0.850527	1.07235		2.2776	3.60045	3.96837	0.455188	-0.867664	-1.23559	-0.549355	0.889198		2.39116	3.82299	2.30947	0.317965	-1.11387	0.399653	-0.132083	0.851231		-0.201449	-0.850527	-0.549355	-0.132083	-0.525988	-0.340719
GTTTGTAGAGTGCTACATGTA	1700052N19Rik	TRCN0000192503	2.80715	3.4503	3.17871	3.49154		3.33825	1.75563	0.284785	-0.531109	1.05151	2.52236	1.01425	1.52708		2.64224	1.73109	0.789202	0.808062	1.71921	2.6611	1.72946	0.92656		0.179783	0	0.256419	2.99892	3.17871	2.92229	3.0333	0.131622		0.0389869	0	0	3.45256	3.49154	3.49154	3.47855	0.0225091		1.01425	1.72946	3.0333	3.47855	1.37186	3.25593
CTTACGATTAAGGACAGAACA	1700052N19Rik	TRCN0000192283	3.49561	3.49669	4.09926	3.58607		0.985938	1.35864	3.17186	2.50967	2.13697	0.323748	1.6568	1.1694		0.819995	1.12153	2.8514	2.6767	2.37516	0.645292	1.89905	1.0962		0.517346	0	0	3.58192	4.09926	4.09926	3.92681	0.29869		0	1.52066	0	3.58607	2.06541	3.58607	3.07918	0.877954		1.6568	1.89905	3.92681	3.07918	1.77792	3.503
CAAGTGTGTTGACACCCACAT	1700052N19Rik	TRCN0000202077	1.9462	2.58521	3.12565	1.3935		1.68741	1.63505	2.69058	0.25879	0.311149	-0.74438	-0.058147	0.594871		0.756049	1.2997	1.89392	1.82916	1.2855	0.691285	1.26865	0.569123		1.29857	1.62058	1.92143	1.82708	1.50507	1.20422	1.51212	0.311488		0.0389869	0	0.102944	1.35451	1.3935	1.29055	1.34619	0.0519742		-0.058147	1.26865	1.51212	1.34619	0.605251	1.42916
GATACATTGCATCGACATAAA	1700052N19Rik	TRCN0000200780	3.31937	3.6023	3.43807	4.06329		3.05256	2.72157	1.47353	0.266809	0.597801	1.84584	0.903483	0.832715		2.21277	2.51977	3.22425	1.38953	1.08254	0.378055	0.950041	0.518592		3.0414	2.46656	4.83406	0.39667	0.971506	-1.39599	-0.00927158	1.23485		0	1.93389	1.95775	4.06329	2.12941	2.10555	2.76608	1.12348		0.903483	0.950041	-0.00927158	2.76608	0.926762	1.37841
GCCATCTCTCTTCTTTCTAAA	1700052N19Rik	TRCN0000201269	3.93854	3.01308	4.06892	1.78995		4.43823	4.22885	4.19396	-0.499694	-0.290307	-0.25542	-0.348474	0.132117		4.66333	4.4409	3.91248	-1.65025	-1.42782	-0.899405	-1.32582	0.385673		4.47901	4.28439	3.65601	-0.410084	-0.215466	0.412913	-0.070879	0.430128		2.47173	3.46282	2.56524	-0.681779	-1.67286	-0.775283	-1.04331	0.547212		-0.348474	-1.32582	-0.070879	-1.04331	-0.837148	-0.557094
GCTTCAAGAATGCGCCTTTCT	1700054O13Rik	TRCN0000092764	3.8698	4.07556	4.09676	4.32489		3.67111	4.09556	4.21833	0.198696	-0.225756	-0.348524	-0.125195	0.287136		2.40224	3.89597	4.19431	1.67332	0.179589	-0.118745	0.578055	0.960186		1.53165	2.98489	2.10657	2.5651	1.11187	1.99019	1.88905	0.731877		1.30986	0.5615	0.102944	3.01503	3.76339	4.22195	3.66679	0.609229		-0.125195	0.578055	1.88905	3.66679	0.22643	2.77792
GCTTGATTACCTCACCGACTA	1700054O13Rik	TRCN0000092763	3.68575	4.25901	4.0638	4.05129		1.8578	2.35662	1.71185	1.82794	1.32912	1.97389	1.71032	0.338096		1.6522	3.20143	2.29884	2.60681	1.05758	1.96017	1.87485	0.778132		2.03055	0.587872	0	2.03326	3.47593	4.0638	3.191	1.04483		0	0	0	4.05129	4.05129	4.05129	4.05129	0		1.71032	1.87485	3.191	4.05129	1.79259	3.62115
TGCAGCGACAACAACCAGATA	1700054O13Rik	TRCN0000092766	2.47825	2.65232	2.75836	3.5092		0.547409	1.25334	0.929101	1.93084	1.22491	1.54915	1.5683	0.353355		3.51699	1.58593	0	-0.864664	1.0664	2.65232	0.951351	1.76131		1.04384	2.77562	2.22134	1.71452	-0.0172607	0.537019	0.744759	0.884383		0	0	0.244773	3.5092	3.5092	3.26442	3.42761	0.14132		1.5683	0.951351	0.744759	3.42761	1.25982	2.08618
CCAACATCAACAACCAGCAAA	1700054O13Rik	TRCN0000092767	2.82045	2.8794	2.68691	3.13579		0.603256	1.27143	3.43567	2.2172	1.54902	-0.615213	1.05033	1.48059		1.44475	3.6769	2.29884	1.43465	-0.7975	0.580554	0.405902	1.12628		1.76079	1.13402	0.133899	0.926113	1.55289	2.55301	1.67734	0.820556		4.37502	0	1.47254	-1.23923	3.13579	1.66325	1.1866	2.22612		1.05033	0.405902	1.67734	1.1866	0.728118	1.43197
GTGAATTATGTGTACCGTATA	1700054O13Rik	TRCN0000092765	5.11381	5.28569	4.96341	4.69443		5.06004	4.81748	4.93036	0.053776	0.296335	0.183455	0.177856	0.121377		5.53688	4.67247	4.95777	-0.251188	0.61322	0.327918	0.229983	0.440447		5.04949	4.50018	4.44279	-0.0860777	0.46323	0.520618	0.299257	0.334941		5.79824	1.17471	3.44281	-1.10381	3.51972	1.25162	1.22251	2.3119		0.177856	0.229983	0.299257	1.22251	0.203919	0.760883
GTTCTAGATAGCTTTCCTGTT	1700055D18Rik	TRCN0000192704	2.71039	3.46904	3.64761	3.6551		2.10027	3.00178	0.247384	0.610126	-0.291389	2.46301	0.927249	1.40432		0.467488	2.49559	0.667297	3.00155	0.97345	2.80174	2.25891	1.11772		0.48351	0.394397	0.133899	3.1641	3.25321	3.51371	3.31034	0.181672		0	0.0482165	0.151786	3.6551	3.60688	3.50331	3.58843	0.077557		0.927249	2.25891	3.31034	3.58843	1.59308	3.44938
CCCAGTTTCCTTTCCAGATTA	1700055D18Rik	TRCN0000201416	4.29613	3.78537	4.72481	4.20001		4.73707	4.43553	3.84542	-0.440946	-0.139407	0.450708	-0.043215	0.453543		4.40383	4.15466	4.22272	-0.618459	-0.369283	-0.437343	-0.475028	0.128792		4.27903	4.69837	4.53444	0.445782	0.0264356	0.190367	0.220862	0.21133		1.88144	5.14819	3.98117	2.31857	-0.948177	0.218843	0.529747	1.65542		-0.043215	-0.475028	0.220862	0.529747	-0.259122	0.375304
CGTAGACTAAAGCTACCTCCT	1700055D18Rik	TRCN0000202019	3.14524	2.73205	2.92572	3.76572		3.82289	3.11131	3.48068	-0.67765	0.0339274	-0.335439	-0.326387	0.355875		3.76456	3.17629	1.3128	-1.03251	-0.444239	1.41925	-0.0191667	1.27996		3.02385	3.8536	4.70373	-0.0981341	-0.927881	-1.77801	-0.934676	0.839959		2.72582	2.03306	3.84672	1.0399	1.73266	-0.0809972	0.897187	0.915213		-0.326387	-0.0191667	-0.934676	0.897187	-0.172777	-0.0187442
CTGGGCTTATCACCATGGTTT	1700055D18Rik	TRCN0000202018	0.216777	0.362635	0.341994	0.18711		0.0410203	0.0842967	0	0.175757	0.132481	0.216777	0.175005	0.0421534		0	0	0.0786222	0.362635	0.362635	0.284013	0.336428	0.0453926		0	0.170896	0.175905	0.341994	0.171098	0.166089	0.226394	0.100144		0	0.0948736	0	0.18711	0.0922365	0.18711	0.155485	0.0547753		0.175005	0.336428	0.226394	0.155485	0.255716	0.19094
CCTTTCCAGATTAACCCTTTA	1700055D18Rik	TRCN0000201010	4.10818	3.15869	2.89145	2.00431		3.50146	3.33855	3.27768	0.606724	0.769633	0.8305	0.735619	0.1157		3.3858	4.08343	3.47737	-0.227113	-0.924737	-0.318683	-0.490177	0.379114		2.77387	4.27035	2.3735	0.117583	-1.3789	0.517955	-0.247788	0.999819		2.52763	1.27942	1.75138	-0.523321	0.72489	0.252926	0.151498	0.630257		0.735619	-0.490177	-0.247788	0.151498	0.122721	-0.0481445
CCTCAATAAGTTTGGGCAGAT	1700055N04Rik	TRCN0000111015	3.42767	2.97426	3.17396	3.99289		3.41438	3.54229	3.90967	0.0132963	-0.114612	-0.482	-0.194438	0.257116		3.61487	3.71929	4.00849	-0.640612	-0.745025	-1.03423	-0.806623	0.203911		5.21327	2.74888	3.18145	-2.03931	0.425082	-0.00748346	-0.540571	1.31584		2.49995	1.08511	3.60506	1.49294	2.90778	0.387824	1.59618	1.26315		-0.194438	-0.806623	-0.540571	1.59618	-0.50053	0.527804
CCTGGGATGGAGAAGCTTAAT	1700055N04Rik	TRCN0000111019	2.77333	2.02576	1.78127	2.99253		1.63478	1.72969	2.32816	1.13855	1.04364	0.445174	0.875787	0.375929		3.43257	2.95767	2.81167	-1.40682	-0.931915	-0.785916	-1.04155	0.324646		1.81621	3.69454	0.571701	-0.0349434	-1.91327	1.20957	-0.246213	1.5721		1.5311	0.346971	1.28822	1.46143	2.64556	1.7043	1.9371	0.625447		0.875787	-1.04155	-0.246213	1.9371	-0.0828813	0.845441
TGAGAGCTGCACCCTTCTGTA	1700055N04Rik	TRCN0000111018	2.37381	2.60228	2.87985	1.14516		1.59401	2.18589	2.68359	0.779794	0.187918	-0.309783	0.219309	0.545467		0.156798	1.79854	2.56774	2.44548	0.803743	0.0345406	1.09459	1.2315		0.136894	0.461813	0	2.74295	2.41804	2.87985	2.68028	0.2372		2.32959	0	0.67057	-1.18443	1.14516	0.474591	0.145106	1.19924		0.219309	1.09459	2.68028	0.145106	0.656949	1.41269
GATGGGCTATCGGCTCTGAGA	1700055N04Rik	TRCN0000111017	2.41825	2.60228	2.21907	1.70058		0.518654	0.972863	1.85549	1.89959	1.44538	0.562759	1.30258	0.679762		0.156798	1.20345	0.717302	2.44548	1.39883	1.88498	1.90976	0.523765		0.762771	0.587872	2.36444	1.4563	1.6312	-0.145374	0.980708	0.979128		0	0.833235	0	1.70058	0.867344	1.70058	1.42283	0.481068		1.30258	1.90976	0.980708	1.42283	1.60617	1.20177
GTGAAGTCATAACTCTACGAA	1700057G04Rik	TRCN0000105133	3.54053	3.84397	3.52259	4.22694		3.76592	3.88549	3.71792	-0.225388	-0.344959	-0.177389	-0.249245	0.0862952		1.84894	3.75368	1.43738	1.99503	0.0902887	2.40659	1.4973	1.23576		3.31107	2.82766	0	0.211521	0.694926	3.52259	1.47634	1.78851		1.26123	1.50347	1.05134	2.96571	2.72347	3.17559	2.95492	0.226256		-0.249245	1.4973	1.47634	2.95492	0.624029	2.21563
CAGTTCCCTTTAGACCTCGAT	1700057G04Rik	TRCN0000105134	2.68879	2.19287	2.78349	2.92836		2.97	2.59078	2.54404	-0.281209	0.0980066	0.14475	-0.0128173	0.233606		2.27113	2.92786	2.91706	-0.0782526	-0.734985	-0.724188	-0.512475	0.376086		3.4224	2.67977	4.39691	-0.638914	0.103716	-1.61342	-0.716205	0.861172		0.113936	1.53765	3.03762	2.81443	1.39071	-0.109258	1.36529	1.46201		-0.0128173	-0.512475	-0.716205	1.36529	-0.262646	0.324544
CCAGTGGGTTATGTTATTCAA	1700057G04Rik	TRCN0000105131	3.9836	3.66052	3.40607	3.5609		4.21221	4.12819	4.2494	-0.228617	-0.144597	-0.265805	-0.213006	0.0620938		4.07742	4.08613	4.26326	-0.416897	-0.425608	-0.602736	-0.481747	0.10487		3.82157	4.76994	4.11053	-0.415507	-1.36388	-0.704463	-0.827949	0.486095		0.439461	2.67892	4.06644	3.12144	0.88198	-0.505539	1.16596	1.83009		-0.213006	-0.481747	-0.827949	1.16596	-0.347377	0.169005
GAAACTGCTAACCGATATAAA	1700057G04Rik	TRCN0000105132	4.42367	4.0067	3.9239	3.3712		3.90573	3.65339	3.68332	0.517939	0.770283	0.740348	0.67619	0.137864		2.75285	3.84902	4.0135	1.25385	0.157676	-0.00680231	0.46824	0.685307		2.76685	3.39158	1.5262	1.15704	0.532315	2.3977	1.36235	0.949489		3.55308	2.81752	2.25462	-0.181874	0.553685	1.11658	0.496131	0.651138		0.67619	0.46824	1.36235	0.496131	0.572215	0.929242
CGGCCAAAGTTTACAGTTCAA	1700057G04Rik	TRCN0000105130	1.33575	0.947673	0.531913	1.23278		0.489313	0.652255	0.699116	0.846437	0.683495	0.636634	0.722189	0.110123		0.106402	1.47486	0.944221	0.841272	-0.527184	0.00345235	0.105847	0.68995		0.261916	1.04889	0	0.269997	-0.516975	0.531913	0.0949783	0.545908		0.317916	0	0.244773	0.91486	1.23278	0.988003	1.04521	0.166501		0.722189	0.105847	0.0949783	1.04521	0.414018	0.570096
TCGACAGGCCATTGGTGAAAT	1700061J05Rik	TRCN0000341178	1.15848	1.55039	2.42473	2.02899		2.38947	2.18589	3.12623	-1.23099	-1.02741	-1.96775	-1.40872	0.494723		3.15115	2.91576	2.68546	-1.60076	-1.36537	-1.13508	-1.36707	0.232846		1.4464	2.48288	2.3825	0.978327	-0.0581532	0.0422349	0.320803	0.571641		0.821285	0	3.79384	1.20771	2.02899	-1.76485	0.490617	1.99599		-1.40872	-1.36707	0.320803	0.490617	-1.38789	0.40571
ACATGCGATCCAACTTGTTTC	1700061J05Rik	TRCN0000341177	1.3171	2.76275	1.90092	2.04118		3.39473	2.23281	2.34596	-2.07764	-0.91572	-1.02887	-1.34074	0.640673		3.02116	1.7853	1.79261	-0.258413	0.977452	0.970145	0.563061	0.711427		1.25912	5.52422	0.0460276	0.641805	-3.6233	1.85489	-0.375533	2.87731		1.37225	2.09175	0.601923	0.668928	-0.05057	1.43926	0.685871	0.745058		-1.34074	0.563061	-0.375533	0.685871	-0.38884	0.155169
CAGGACTTCTCTGGCTATGAA	1700061J05Rik	TRCN0000352476	0.133933	0.362635	0.162071	0.18711		0	0	0.208988	0.133933	0.133933	-0.0750556	0.06427	0.12066		0	0.0451324	0	0.362635	0.317503	0.362635	0.347591	0.0260572		0	0	0	0.162071	0.162071	0.162071	0.162071	0		0	0	0.199029	0.18711	0.18711	-0.0119188	0.120767	0.114909		0.06427	0.347591	0.162071	0.120767	0.20593	0.141419
CTGAGAACATCCGCCACAAAT	1700061J05Rik	TRCN0000341176	0.776856	0	0.501946	0		0	0.0842967	0.128988	0.776856	0.692559	0.647868	0.705761	0.0654996		0	0	0	0	0	0	0	0		0.0470894	0	0	0.454857	0.501946	0.501946	0.48625	0.0271871		0.57827	0	0	-0.57827	0	0	-0.192757	0.333864		0.705761	0	0.48625	-0.192757	0.35288	0.146746
ACTCCTTCAGAGCTAACCATA	1700061J05Rik	TRCN0000341179	2.32796	0.514661	0.776822	0.899566		0	0.758699	0	2.32796	1.56926	2.32796	2.07506	0.438035		0.0541816	0.562346	0.857688	0.460479	-0.0476848	-0.343027	0.0232559	0.406423		0	2.27369	0	0.776822	-1.49687	0.776822	0.0189246	1.31272		0	0.183891	0	0.899566	0.715675	0.899566	0.838269	0.10617		2.07506	0.0232559	0.0189246	0.838269	1.04916	0.428597
GCCATTTATCTGGACAGCCTT	1700065D16Rik	TRCN0000190029	4.84749	4.42654	4.73612	4.50726		5.47455	5.8119	6.66015	-0.627064	-0.964407	-1.81266	-1.13471	0.610868		5.45868	5.53243	6.97966	-1.03214	-1.10588	-2.55312	-1.56371	0.857643		4.67537	4.7329	4.5644	0.0607508	0.00321892	0.171715	0.0785615	0.0856482		2.20657	3.19481	4.93824	2.30069	1.31244	-0.430985	1.06071	1.38312		-1.13471	-1.56371	0.0785615	1.06071	-1.34921	0.569638
CCTGACGACCCAACAAAGTTA	1700065D16Rik	TRCN0000190190	1.4936	1.51476	2.05333	1.63776		0.899358	1.4248	2.21646	0.594243	0.0687959	-0.722864	-0.0199417	0.663022		2.32721	2.42904	1.7809	-0.812449	-0.914276	-0.266132	-0.664286	0.34855		0.517346	0.861893	1.19958	1.53599	1.19144	0.853752	1.19373	0.341124		0	1.57104	0.601923	1.63776	0.0667274	1.03584	0.913444	0.792638		-0.0199417	-0.664286	1.19373	0.913444	-0.342114	1.05359
CCCAGGTCACTTTCCATCATT	1700065D16Rik	TRCN0000189446	2.58346	2.77786	2.84446	1.65373		2.85393	2.59797	1.40724	-0.270476	-0.0145121	1.17621	0.297075	0.772038		1.10306	2.84733	2.44698	1.6748	-0.0694754	0.330881	0.645401	0.913681		1.49816	2.622	2.05122	1.34631	0.222461	0.79324	0.787337	0.561947		0	0.0482165	0.529847	1.65373	1.60551	1.12388	1.46104	0.292982		0.297075	0.645401	0.787337	1.46104	0.471238	1.12419
CCACAGCACTACATGGCTATA	1700065D16Rik	TRCN0000202220	2.1706	2.71645	2.2733	1.21137		2.45164	2.18589	1.96322	-0.28104	-0.0152892	0.207379	-0.0296503	0.244526		2.89324	2.20873	1.46691	-0.176782	0.507726	1.24955	0.526831	0.713357		1.42873	0.703797	3.26653	0.844567	1.5695	-0.993228	0.473613	1.32102		1.44663	5.43784	1.39351	-0.235262	-4.22648	-0.182148	-1.54796	2.31981		-0.0296503	0.526831	0.473613	-1.54796	0.24859	-0.537174
GCAGGTGAATCAGATTGCTAT	1700066C05Rik	TRCN0000087230	1.27905	2.3014	2.11403	2.21261		1.23605	1.75563	2.21646	0.0429917	-0.476587	-0.937418	-0.457004	0.490498		2.43324	2.51175	1.55204	-0.131837	-0.21035	0.749364	0.135726	0.532874		0.818117	1.73401	2.0399	1.29591	0.380019	0.0741319	0.583354	0.635763		0.821285	0.422081	0.858848	1.39132	1.79053	1.35376	1.51187	0.242054		-0.457004	0.135726	0.583354	1.51187	-0.160639	1.04761
TGCAAGAATGAGGCTCCTGAT	1700066C05Rik	TRCN0000086718	2.39175	3.24819	3.0133	3.78759		2.85968	2.06662	2.87967	-0.46793	0.325125	-0.487918	-0.210241	0.463748		2.54152	3.15071	2.81167	0.70667	0.097481	0.436518	0.413556	0.305243		2.83552	1.98378	2.41793	0.177777	1.02951	0.595364	0.600885	0.425895		2.56817	1.86825	1.98496	1.21941	1.91933	1.80263	1.64713	0.374978		-0.210241	0.413556	0.600885	1.64713	0.101658	1.12401
GACACACAGGACCAGACGGAA	1700066C05Rik	TRCN0000112117	2.65205	1.58516	1.81822	0.759074		2.33278	2.23281	0.80588	0.319265	0.419234	1.84617	0.861556	0.854164		3.0075	1.14245	1.59279	-1.42234	0.442705	-0.00763519	-0.32909	0.973189		0	0.170896	2.93466	1.81822	1.64732	-1.11644	0.783035	1.64721		0.185182	0	0.636655	0.573892	0.759074	0.122419	0.485129	0.327478		0.861556	-0.32909	0.783035	0.485129	0.266233	0.634082
CAGGTGAATCAGATTGCTATA	1700066C05Rik	TRCN0000112116	0.332754	0.44065	0.673069	0.428895		0.365594	0.732815	0.490859	-0.0328393	-0.400061	-0.158105	-0.197001	0.186675		0.582565	0.652603	1.02586	-0.141916	-0.211953	-0.585207	-0.313025	0.238303		0.550406	0.461813	0.0460276	0.122662	0.211256	0.627041	0.32032	0.269297		0.551556	0.527888	1.43357	-0.122661	-0.0989928	-1.00467	-0.408776	0.516199		-0.197001	-0.313025	0.32032	-0.408776	-0.255013	-0.0442282
CCGAATGCATTTGCACAAATT	1700066M21Rik	TRCN0000367030	1.60545	1.05078	2.58339	1.81855		1.82294	1.81851	1.96322	-0.217498	-0.213066	-0.357777	-0.26278	0.0822992		2.48347	1.96043	4.45229	-1.43269	-0.909655	-3.40151	-1.91462	1.31398		2.23756	0.394397	0	0.345833	2.18899	2.58339	1.70607	1.19439		0	0	0	1.81855	1.81855	1.81855	1.81855	0		-0.26278	-1.91462	1.70607	1.81855	-1.0887	1.76231
CATCTAACTGTGAGTCTAATC	1700066M21Rik	TRCN0000367031	2.11769	1.58516	2.53981	3.42799		0.876876	2.04575	2.97999	1.24081	0.0719363	-0.862299	0.15015	1.05373		1.87927	1.28096	0.965067	-0.294116	0.304198	0.62009	0.210057	0.464317		1.88262	1.83916	0	0.657188	0.70065	2.53981	1.29922	1.07461		0	0	1.84346	3.42799	3.42799	1.58454	2.81351	1.06432		0.15015	0.210057	1.29922	2.81351	0.180104	2.05636
GCTAATTCTATGACCATTAAA	1700066M21Rik	TRCN0000367059	3.93854	3.32219	4.07402	3.3712		3.53774	5.1279	4.58166	0.400803	-1.18936	-0.643121	-0.477225	0.807956		4.15074	3.09814	4.02099	-0.828551	0.224052	-0.698797	-0.434432	0.573943		2.03055	2.59223	3.10197	2.04348	1.4818	0.972058	1.49911	0.53592		0.524338	2.39183	3.4958	2.84687	0.979371	-0.124595	1.23388	1.50199		-0.477225	-0.434432	1.49911	1.23388	-0.455828	1.3665
TTTCAGGGTTCACGAAGTATT	1700066M21Rik	TRCN0000367032	1.69486	1.147	1.70441	1.66951		1.58017	2.17632	1.9282	0.114697	-0.481458	-0.233335	-0.200032	0.299469		3.32098	3.39254	1.79261	-2.17398	-2.24553	-0.645603	-1.68837	0.903773		2.81526	2.09413	0	-1.11085	-0.389723	1.70441	0.0679434	1.46237		0.28586	0.226422	0.829125	1.38365	1.44309	0.840388	1.22238	0.332145		-0.200032	-1.68837	0.0679434	1.22238	-0.944202	0.645161
TGACTTTGCTGAGACCTATTT	1700066M21Rik	TRCN0000376219	3.21239	2.56793	3.30556	2.71674		1.04762	0.881579	2.63373	2.16477	2.33081	0.578659	1.69141	0.967244		1.44475	3.10348	0.717302	1.12318	-0.535555	1.85063	0.812751	1.223		2.60319	0.646999	0	0.702368	2.65856	3.30556	2.22216	1.35535		2.24875	0.226422	0.151786	0.467986	2.49032	2.56495	1.84109	1.18972		1.69141	0.812751	2.22216	1.84109	1.25208	2.03162
CATTGGATGGTGCATCGTTTA	1700066M21Rik	TRCN0000377228	2.2806	0.362635	0.986127	2.41347		2.59627	0	0	-0.315667	2.2806	2.2806	1.41518	1.49896		0	0	0	0.362635	0.362635	0.362635	0.362635	0		0.221434	0	0	0.764693	0.986127	0.986127	0.912316	0.127845		0	0	0	2.41347	2.41347	2.41347	2.41347	0		1.41518	0.362635	0.912316	2.41347	0.888907	1.66289
CTCGTCATCCTGAGAATTATC	1700066M21Rik	TRCN0000376218	0.0460397	0	0.0422563	0.0965863		0.0809064	0.124667	0.0442899	-0.0348667	-0.0786274	0.00174982	-0.0372481	0.0402415		0.205492	0.0451324	0.116383	-0.205492	-0.0451324	-0.116383	-0.122336	0.0803456		0	0.0879768	0.0906321	0.0422563	-0.0457204	-0.0483757	-0.0172799	0.051577		0.0769479	0	0	0.0196384	0.0965863	0.0965863	0.070937	0.0444259		-0.0372481	-0.122336	-0.0172799	0.070937	-0.079792	0.0268285
TCCGGACTTTGGAGCCTTTAA	1700066M21Rik	TRCN0000376217	1.45998	1.23721	1.04965	0.0965863		0.365594	0.566928	1.5369	1.09439	0.893057	-0.0769157	0.636844	0.626278		2.03558	0.593063	1.21177	-0.79837	0.644144	0.0254395	-0.0429286	0.723683		0.734281	0.170896	0	0.31537	0.878755	1.04965	0.747926	0.384226		0.185182	0.140069	0	-0.0885959	-0.0434826	0.0965863	-0.0118307	0.0965634		0.636844	-0.0429286	0.747926	-0.0118307	0.296958	0.368047
GCCATCTATCACCTCAGAGAT	1700071K01Rik	TRCN0000088271	3.67113	3.17018	2.77098	3.85817		3.48669	2.39838	2.55938	0.184444	1.27275	1.11175	0.856312	0.587397		2.85559	1.75845	2.73485	0.314593	1.41174	0.435331	0.720553	0.601619		1.23898	2.02894	0	1.532	0.74204	2.77098	1.68167	1.02272		1.90273	0.71873	1.17464	1.95543	3.13944	2.68353	2.5928	0.597194		0.856312	0.720553	1.68167	2.5928	0.788433	2.13724
CCTCATATCTACACCAACATT	1700071K01Rik	TRCN0000088270	3.46628	3.75516	3.83955	3.25568		3.30916	1.94789	3.20638	0.157117	1.51839	0.2599	0.645134	0.758003		3.34291	4.19025	3.23716	0.412245	-0.435092	0.517998	0.16505	0.522421		2.07666	3.10573	1.54235	1.76288	0.733819	2.2972	1.59797	0.794632		1.34139	1.7566	2.33084	1.91429	1.49908	0.924845	1.44607	0.496847		0.645134	0.16505	1.59797	1.44607	0.405092	1.52202
CAGTTATATTTGACTGTCGCT	1700071K01Rik	TRCN0000088272	4.33141	4.13544	4.24207	4.30229		3.65137	3.94306	2.61183	0.680037	0.388351	1.71958	0.929323	0.699752		3.48282	3.54171	3.72966	0.652611	0.593724	0.405775	0.550703	0.128919		2.64205	3.74953	4.338	1.60002	0.492538	-0.0959319	0.665541	0.861108		3.57646	0.267734	1.49164	0.725829	4.03455	2.81064	2.52367	1.67292		0.929323	0.550703	0.665541	2.52367	0.740013	1.59461
AGGCCTCCCCTGCTTCACCTT	1700071K01Rik	TRCN0000088268	3.13994	3.38273	3.41413	3.36637		3.735	3.29941	3.70763	-0.595057	-0.159463	-0.567683	-0.440734	0.243972		3.87405	3.2359	3.09782	-0.491314	0.146833	0.284917	-0.0198547	0.414092		2.73125	2.84038	4.09966	0.682879	0.573751	-0.685524	0.190368	0.760505		2.76123	4.91456	3.2544	0.60514	-1.54819	0.111974	-0.277026	1.12814		-0.440734	-0.0198547	0.190368	-0.277026	-0.230294	-0.0433286
CGCTCTCAACCACGGAATATA	1700071K01Rik	TRCN0000088269	2.66686	3.54164	1.84234	1.58879		1.2881	0.537327	1.61239	1.37876	2.12953	1.05447	1.52092	0.551451		0.205492	0.62314	0.224074	3.33615	2.9185	3.31757	3.19074	0.235948		0.448861	1.04889	0	1.39348	0.793448	1.84234	1.34309	0.526257		0	0	0.244773	1.58879	1.58879	1.34402	1.5072	0.14132		1.52092	3.19074	1.34309	1.5072	2.35583	1.42514
CATTGATAGTATGGGCGATTT	1700072E05Rik	TRCN0000126616	3.08035	3.59379	3.29249	3.86504		4.03065	3.78831	2.71818	-0.950295	-0.707957	0.362172	-0.432027	0.698388		3.08762	3.24076	2.97473	0.506175	0.353033	0.619059	0.492756	0.13352		2.25772	2.70782	1.98188	1.03477	0.584675	1.31061	0.976687	0.366439		2.25704	0.688625	0.0523899	1.608	3.17642	3.81265	2.86569	1.1347		-0.432027	0.492756	0.976687	2.86569	0.0303645	1.92119
GTTAAGATAGACTACACGAAT	1700072E05Rik	TRCN0000126614	4.26483	4.44085	4.19368	4.54839		3.74745	4.21723	4.29135	0.517386	0.0476054	-0.02652	0.179491	0.294964		3.68523	3.95924	4.36479	0.755619	0.481613	0.0760568	0.437763	0.341896		5.3333	3.00763	2.56744	-1.13962	1.18605	1.62623	0.557556	1.48618		0	3.19481	0.67057	4.54839	1.35358	3.87782	3.25993	1.68465		0.179491	0.437763	0.557556	3.25993	0.308627	1.90874
CGTTAAGATAGACTACACGAA	1700072E05Rik	TRCN0000126615	3.60731	4.01947	3.24353	3.33206		2.96468	3.24551	3.1365	0.642627	0.361798	0.470808	0.491744	0.14158		2.56036	2.45436	2.2572	1.45911	1.56511	1.76227	1.5955	0.15385		1.29857	2.23568	2.93466	1.94496	1.00785	0.308868	1.08722	0.820927		1.37225	0.183891	2.44301	1.95981	3.14817	0.88905	1.99901	1.13007		0.491744	1.5955	1.08722	1.99901	1.04362	1.54312
GAAACACTATACTGCTGCATT	1700072E05Rik	TRCN0000126618	3.87937	4.49671	4.48929	3.2186		3.13539	2.67475	3.18676	0.743982	1.20462	0.692614	0.880406	0.281951		2.80908	3.39689	2.17011	1.68762	1.09981	2.3266	1.70468	0.613572		3.28675	2.78881	2.55158	1.20254	1.70048	1.93771	1.61358	0.375211		3.72132	1.60367	1.73545	-0.502714	1.61493	1.48316	0.865126	1.18641		0.880406	1.70468	1.61358	0.865126	1.29254	1.23935
CTCGTTTGTTAAGGGACAGAT	1700072E05Rik	TRCN0000126617	0.256481	0.44065	0.162071	0.352715		0.299514	0.124667	0.128988	-0.0430323	0.131814	0.127493	0.0720917	0.0997237		0.298212	0.25177	0.15318	0.142437	0.188879	0.287469	0.206262	0.0740621		0.221434	0	0.0906321	-0.0593633	0.162071	0.0714389	0.0580489	0.111323		0.57827	0	0.529847	-0.225555	0.352715	-0.177132	-0.0166571	0.320801		0.0720917	0.206262	0.0580489	-0.0166571	0.139177	0.0206959
GCAGACATACTGGACTGCGAT	1700073E17Rik	TRCN0000096758	3.94159	3.80025	4.33636	4.48066		2.72141	3.21778	2.89788	1.22017	0.723805	1.0437	0.995895	0.251615		2.22463	1.77194	3.64499	1.57561	2.02831	0.155253	1.25306	0.977302		1.94611	3.06295	1.37211	2.39025	1.27341	2.96425	2.2093	0.859818		2.28974	2.59214	1.15081	2.19092	1.88852	3.32985	2.46976	0.760048		0.995895	1.25306	2.2093	2.46976	1.12448	2.33953
CCACAAGTATAGGCAGACATA	1700073E17Rik	TRCN0000096755	3.33799	4.44085	4.34483	3.71337		3.43376	3.31693	2.4066	-0.0957683	0.0210581	0.931397	0.285562	0.562351		3.18189	3.50987	2.77082	1.25896	0.930983	1.67003	1.28666	0.370304		2.96377	2.56182	4.00379	1.38106	1.783	0.341036	1.16837	0.744142		1.83789	2.32491	0.998915	1.87549	1.38847	2.71446	1.9928	0.670736		0.285562	1.28666	1.16837	1.9928	0.78611	1.58059
GCTCGATCTCTTGGTACATTT	1700073E17Rik	TRCN0000096754	4.29136	4.33247	3.7721	4.3496		4.35121	5.11292	4.36086	-0.0598562	-0.821568	-0.069502	-0.316976	0.437017		6.05069	4.28736	4.69466	-1.71821	0.0451126	-0.362185	-0.678429	0.923221		5.43969	3.32977	2.75233	-1.66759	0.442326	1.01977	-0.0684987	1.41463		4.98297	2.68656	3.60506	-0.633365	1.66304	0.744537	0.591406	1.15584		-0.316976	-0.678429	-0.0684987	0.591406	-0.497702	0.261453
GCAAGGCACTACCACAAGTAT	1700073E17Rik	TRCN0000096756	3.70381	3.02579	3.85445	3.59849		0.230261	1.4248	0.83138	3.47355	2.279	2.87243	2.87499	0.597276		0.106402	0.13137	0.534134	2.91939	2.89442	2.49166	2.76849	0.240068		1.7466	0.249307	0	2.10785	3.60514	3.85445	3.18915	0.944691		0	0.0948736	0.244773	3.59849	3.50362	3.35372	3.48528	0.123413		2.87499	2.76849	3.18915	3.48528	2.82174	3.33721
CGCAAGGTAGTGCAGCTTCTT	1700073E17Rik	TRCN0000096757	3.83744	3.9611	3.72423	3.2661		1.78722	1.85496	3.06843	2.05022	1.98248	0.769015	1.60057	0.720945		1.8942	0.0451324	0.324282	2.0669	3.91597	3.63682	3.20656	0.996799		1.94611	2.72163	0.474067	1.77812	1.0026	3.25016	2.01029	1.14163		0	0	1.43357	3.2661	3.2661	1.83253	2.78825	0.827672		1.60057	3.20656	2.01029	2.78825	2.40357	2.39927
GCACCTTTGTTAAGCTCAACA	1700073E17Rik	TRCN0000096868	3.02395	2.74748	3.20219	2.12372		0	0	0	3.02395	3.02395	3.02395	3.02395	5.43896e-16		0	0	0	2.74748	2.74748	2.74748	2.74748	0		0	0	0	3.20219	3.20219	3.20219	3.20219	0		0	0	0	2.12372	2.12372	2.12372	2.12372	0		3.02395	2.74748	3.20219	2.12372	2.88572	2.66296
GCAGTAGCTAATACTCCCAAA	1700074P13Rik	TRCN0000032440	2.92886	3.52383	3.80007	4.7325		4.56318	4.36777	3.39776	-1.63432	-1.43891	-0.468899	-1.18071	0.624139		4.34799	3.63692	3.29593	-0.824163	-0.11309	0.227896	-0.236452	0.536769		3.61832	3.22695	1.23975	0.181757	0.573126	2.56033	1.10507	1.27539		3.80003	5.61436	2.23209	0.932477	-0.881855	2.50042	0.850346	1.69263		-1.18071	-0.236452	1.10507	0.850346	-0.708581	0.977708
CCTTGTGTTGGGACTCTCATT	1700074P13Rik	TRCN0000032442	3.92012	3.26972	3.31421	2.73935		2.71509	4.10568	2.98567	1.20503	-0.185563	0.934442	0.651301	0.737266		4.12566	3.84902	4.09614	-0.855936	-0.579302	-0.826422	-0.753887	0.151913		1.9829	2.76231	0.0906321	1.3313	0.551896	3.22358	1.70226	1.37393		1.3569	0.183891	3.71478	1.38245	2.55546	-0.975427	0.987495	1.79827		0.651301	-0.753887	1.70226	0.987495	-0.0512925	1.34488
GCTATGGAACCAATGGCATTT	1700074P13Rik	TRCN0000032443	3.11856	3.91402	3.68809	3.38561		3.97352	4.44951	4.33435	-0.854963	-1.33095	-1.21579	-1.1339	0.248335		4.81813	5.0855	6.05291	-0.904115	-1.17148	-2.13889	-1.40483	0.64962		4.80773	5.33268	5.31369	-1.11964	-1.64458	-1.6256	-1.46327	0.29775		0.439461	3.13468	2.2434	2.94615	0.250937	1.14221	1.44643	1.37312		-1.1339	-1.40483	-1.46327	1.44643	-1.26936	-0.00841929
CTATGCAAGATGGATCTTAAA	1700074P13Rik	TRCN0000032441	3.73576	3.55923	4.00893	3.53958		3.60767	3.0445	2.37226	0.128094	0.691269	1.3635	0.727623	0.618507		1.68691	3.7939	2.21431	1.87233	-0.234665	1.34493	0.994196	1.09641		2.35449	4.07428	2.83331	1.65444	-0.0653568	1.17562	0.921567	0.887599		0.57827	0.989569	0.88797	2.96131	2.55001	2.65161	2.72098	0.214244		0.727623	0.994196	0.921567	2.72098	0.860909	1.82127
CCTGACATCTTGACATGGATA	1700074P13Rik	TRCN0000032439	3.21743	3.05088	2.83247	2.62256		2.47428	1.63505	1.96322	0.74315	1.58238	1.25421	1.19325	0.422925		3.61937	2.68572	1.49585	-0.568488	0.365163	1.55504	0.450571	1.06434		1.4464	1.67841	2.24126	1.38607	1.15406	0.591212	1.04378	0.408744		1.00971	0.860495	2.02483	1.61285	1.76206	0.597724	1.32421	0.633565		1.19325	0.450571	1.04378	1.32421	0.82191	1.184
CAGCATCTTATCCACCGACTA	1700080E11Rik	TRCN0000189596	3.24236	3.07555	3.72747	3.83386		3.33413	2.98543	1.75246	-0.0917714	0.256929	1.4899	0.551685	0.831012		1.98068	3.07656	2.9224	1.09487	-0.00101729	0.153145	0.415665	0.593235		3.50061	2.82766	3.46593	0.226864	0.899812	0.261541	0.462739	0.378913		2.00473	2.04499	1.10193	1.82913	1.78887	2.73192	2.11664	0.533232		0.551685	0.415665	0.462739	2.11664	0.483675	1.28969
GCTGAATAAGGAACTGTTGAA	1700080E11Rik	TRCN0000192830	4.82125	4.9106	5.31536	4.57588		5.21706	5.31179	4.60772	-0.395809	-0.490536	0.213532	-0.224271	0.382095		5.62678	6.16657	6.15622	-0.716171	-1.25597	-1.24562	-1.07259	0.308708		6.0893	5.88968	5.01852	-0.773943	-0.57432	0.296844	-0.350473	0.569409		3.08839	4.61778	4.8485	1.48749	-0.0419049	-0.272619	0.390989	0.95658		-0.224271	-1.07259	-0.350473	0.390989	-0.648428	0.0202582
GAGTGTCCACTTTCAGCATCT	1700080E11Rik	TRCN0000202383	3.66745	4.17591	3.86331	3.5609		2.93778	3.75655	4.1105	0.729673	-0.0890928	-0.443045	0.065845	0.601515		2.74464	3.5018	3.05956	1.43127	0.674118	1.11635	1.07392	0.380358		2.70213	4.24187	3.74241	1.16119	-0.378556	0.1209	0.301176	0.785541		3.13412	1.17471	2.06364	0.426783	2.38619	1.49726	1.43674	0.981102		0.065845	1.07392	0.301176	1.43674	0.56988	0.86896
CTATGCTGTGCTGATGTCCAT	1700080E11Rik	TRCN0000201928	2.89152	3.94781	2.92006	3.57354		2.77711	3.46578	2.51286	0.114417	-0.574258	0.378665	-0.0270587	0.491962		1.22617	2.74163	2.1611	2.72164	1.20618	1.7867	1.90484	0.764605		0.972453	2.74888	3.15544	1.94761	0.171183	-0.235373	0.627807	1.16092		2.32171	3.14025	1.17464	1.25183	0.433292	2.3989	1.36134	0.987369		-0.0270587	1.90484	0.627807	1.36134	0.938891	0.994573
CAAATGCCTAACACTAGAGCA	1700080E11Rik	TRCN0000201433	3.29574	3.47831	3.16443	2.62256		2.99109	4.12073	3.74836	0.304656	-0.824986	-0.452614	-0.324315	0.575646		5.14743	3.4482	3.4954	-1.66911	0.0301131	-0.017083	-0.552028	0.967713		2.57936	5.14032	4.66738	0.585064	-1.97589	-1.50295	-0.964594	1.36272		4.06849	2.24442	2.75106	-1.44593	0.378143	-0.1285	-0.398762	0.941589		-0.324315	-0.552028	-0.964594	-0.398762	-0.438171	-0.681678
ATCACTTCCCTGCCATCTTTA	1700080O16Rik	TRCN0000341770	1.70924	1.40228	1.97914	3.53097		2.75878	2.1954	2.31917	-1.04954	-0.486158	-0.609933	-0.71521	0.296078		2.2364	3.16611	2.40182	-0.834117	-1.76383	-0.99954	-1.19916	0.495963		3.65678	0.526219	4.01251	-1.67764	1.45292	-2.03337	-0.752695	1.91838		0	0	0.289112	3.53097	3.53097	3.24185	3.43459	0.166919		-0.71521	-1.19916	-0.752695	3.43459	-0.957187	1.34095
GCCATTCCCATCCAACATCAG	1700080O16Rik	TRCN0000341698	1.42557	0.716321	2.78349	2.0167		1.08733	1.48806	3.46039	0.338236	-0.0624968	-2.03483	-0.586362	1.27031		0	0.0888957	0	0.716321	0.627426	0.716321	0.68669	0.0513239		2.48846	2.19663	0	0.295027	0.586858	2.78349	1.22179	1.36032		0	1.29948	0.244773	2.0167	0.717227	1.77193	1.50195	0.690525		-0.586362	0.68669	1.22179	1.50195	0.0501638	1.36187
TAGGCAGCAGATACTCAATAG	1700080O16Rik	TRCN0000341697	0.95634	0.28016	0.272694	1.88767		0.876876	0.732815	0	0.0794645	0.223525	0.95634	0.419777	0.470227		0.106402	1.53937	0	0.173758	-1.25921	0.28016	-0.268431	0.859687		0	0.170896	0	0.272694	0.101798	0.272694	0.215728	0.0986666		0	0	0	1.88767	1.88767	1.88767	1.88767	0		0.419777	-0.268431	0.215728	1.88767	0.075673	1.0517
ATATGGTCATCCGAGGTTATG	1700080O16Rik	TRCN0000341699	2.78695	2.68475	1.98998	3.13579		3.02726	1.47251	1.5369	-0.24031	1.31445	1.25005	0.774729	0.879639		3.56443	1.91253	1.56575	-0.879682	0.77222	1.11899	0.337177	1.068		2.26769	1.59078	1.25942	-0.277715	0.399199	0.730561	0.284015	0.513912		0.468312	1.63558	0.244773	2.66748	1.50021	2.89102	2.3529	0.746864		0.774729	0.337177	0.284015	2.3529	0.555953	1.31846
ACCAAAGATAGGCTTACTAAT	1700080O16Rik	TRCN0000352500	3.08587	2.80761	3.58823	1.90111		5.01314	3.75333	4.88084	-1.92726	-0.66746	-1.79497	-1.46323	0.692326		2.88579	3.10348	4.31085	-0.0781808	-0.295877	-1.50325	-0.625769	0.767675		4.11744	2.3289	3.35146	-0.529208	1.25933	0.236776	0.3223	0.897332		3.46635	3.3423	5.77241	-1.56525	-1.44119	-3.8713	-2.29258	1.36862		-1.46323	-0.625769	0.3223	-2.29258	-1.0445	-0.985141
CAGACATATGAGCCTGTGAAT	1700093K21Rik	TRCN0000123908	4.08632	3.87942	4.50448	4.42361		5.15652	6.37683	4.76155	-1.07021	-2.29051	-0.675239	-1.34532	0.842047		3.71497	3.57671	5.42273	0.164449	0.302704	-1.54331	-0.35872	1.02821		2.50542	3.39158	5.18975	1.99906	1.1129	-0.685265	0.808897	1.36774		3.10226	2.10321	4.43039	1.32136	2.32041	-0.00677906	1.21166	1.16747		-1.34532	-0.35872	0.808897	1.21166	-0.85202	1.01028
GTGAACAAATACAGACAGGAT	1700093K21Rik	TRCN0000123904	4.72724	4.24277	4.59243	4.64138		5.19224	3.80393	4.46635	-0.464996	0.923314	0.260891	0.239736	0.694397		1.9946	4.20524	4.06751	2.24817	0.0375302	0.175256	0.820319	1.23847		3.19565	2.622	3.12359	1.39678	1.97042	1.46884	1.61201	0.312476		4.52674	0.688625	2.06364	0.114648	3.95276	2.57774	2.21505	1.94459		0.239736	0.820319	1.61201	2.21505	0.530027	1.91353
GAGATGGACAAACCCGAAGAT	1700093K21Rik	TRCN0000123907	2.82045	3.30143	3.1692	3.58607		1.99981	2.92956	2.79147	0.820639	-0.109109	0.0289836	0.246838	0.5017		1.7208	1.24272	2.6278	1.58063	2.05871	0.67363	1.43766	0.703521		1.56439	2.19663	1.63561	1.60481	0.972571	1.53359	1.37033	0.346301		0.908081	0.0948736	3.3569	2.67799	3.4912	0.229176	2.13279	1.69798		0.246838	1.43766	1.37033	2.13279	0.842247	1.75156
CGAGAACATAAGGAGAGGAAA	1700093K21Rik	TRCN0000123905	2.81381	3.59379	3.00264	3.93855		3.42216	3.14114	3.5629	-0.608348	-0.327324	-0.749087	-0.561586	0.214734		4.59415	3.68048	3.58902	-1.00036	-0.0866859	0.00477387	-0.360757	0.555795		2.92647	4.0471	4.97308	0.0761622	-1.04447	-1.97044	-0.979581	1.02484		2.03397	4.61578	2.16229	1.90457	-0.677238	1.77626	1.0012	1.45498		-0.561586	-0.360757	-0.979581	1.0012	-0.461171	0.0108084
CACAGCGATCACATTCTTCTT	1700093K21Rik	TRCN0000123906	4.42367	4.5938	3.85445	4.09287		4.77556	4.05957	4.81046	-0.351888	0.364102	-0.386787	-0.124858	0.423811		4.68495	5.0064	4.52954	-0.0911488	-0.412597	0.06426	-0.146495	0.243199		5.061	4.76328	4.99524	-1.20656	-0.90883	-1.14079	-1.08539	0.156404		4.61807	4.09671	2.59203	-0.52521	-0.0038452	1.50084	0.323927	1.05204		-0.124858	-0.146495	-1.08539	0.323927	-0.135677	-0.380733
ACATTGGACCAACGGAGAAAC	1700094D03Rik	TRCN0000341994	2.20144	1.28028	3.23899	1.27467		0.683171	1.71655	2.56699	1.51827	0.484895	-0.365549	0.545873	0.94339		2.44343	0.432486	1.3128	-1.16315	0.847794	-0.0325249	-0.115959	1.00806		1.11186	0.811095	1.29797	2.12713	2.4279	1.94102	2.16535	0.245676		0.0389869	0	0.529847	1.23568	1.27467	0.744819	1.08506	0.295297		0.545873	-0.115959	2.16535	1.08506	0.214957	1.6252
CTAAGGATGAAGGATACTAAG	1700094D03Rik	TRCN0000341996	2.20144	1.74744	1.59511	2.88845		1.72565	1.50345	0.169543	0.475791	0.697988	2.0319	1.06856	0.841642		0.298212	2.06274	1.61934	1.44923	-0.3153	0.128103	0.420677	0.917926		0	0.646999	0	1.59511	0.948107	1.59511	1.37944	0.373545		1.44663	0.183891	0	1.44182	2.70456	2.88845	2.34494	0.787512		1.06856	0.420677	1.37944	2.34494	0.744618	1.86219
CTGCCTTACACGAGCTGTTTG	1700094D03Rik	TRCN0000341993	0.256481	0.44065	0.440077	0.60341		0.194347	0.27572	0.169543	0.0621347	-0.0192382	0.0869386	0.0432784	0.0555432		0.0541816	0.28977	0.291646	0.386468	0.15088	0.149003	0.228784	0.136562		0	0.0879768	0.0906321	0.440077	0.3521	0.349445	0.38054	0.051577		0	0.140069	0.151786	0.60341	0.463341	0.451624	0.506125	0.0844547		0.0432784	0.228784	0.38054	0.506125	0.136031	0.443333
AGTACCAGCAGGAACTCAATC	1700094D03Rik	TRCN0000342069	2.48662	3.35278	2.66679	3.13579		1.40269	1.92522	0.642617	1.08392	0.561401	1.844	1.16311	0.644956		0.252597	1.61615	2.33932	3.10018	1.73663	1.01346	1.95009	1.05961		3.07587	0	2.24126	-0.409079	2.66679	0.425528	0.894413	1.59064		0.886866	0.0948736	1.37306	2.24892	3.04092	1.76273	2.35085	0.645162		1.16311	1.95009	0.894413	2.35085	1.5566	1.62263
TTTAGGCCACAGGGCTTATTC	1700094D03Rik	TRCN0000341995	2.41825	3.00026	2.56177	1.25387		2.27378	2.1954	3.30069	0.144469	0.222848	-0.882439	-0.171707	0.616758		1.4036	2.35031	1.52422	1.59666	0.649944	1.47604	1.24088	0.515307		3.5216	4.61569	0.133899	-0.959835	-2.05392	2.42787	-0.195296	2.33666		0.28586	0.626462	2.33084	0.968013	0.627411	-1.07696	0.172821	1.09566		-0.171707	1.24088	-0.195296	0.172821	0.534586	-0.0112375
CCAAGTTACCAATAAAGCAAA	1700108M19Rik	TRCN0000177627	4.53683	3.80763	4.31713	3.84433		5.31229	4.43353	5.78452	-0.775464	0.103301	-1.24769	-0.639952	0.685616		5.51652	4.64341	5.59143	-1.70889	-0.835785	-1.7838	-1.44283	0.527045		6.04649	4.15288	4.37453	-1.72936	0.164249	-0.0574064	-0.54084	1.03524		3.12055	4.28202	2.95747	0.723777	-0.437695	0.88686	0.390981	0.722272		-0.639952	-1.44283	-0.54084	0.390981	-1.04139	-0.0749299
GTTGACAAGACACTGTTTGAT	1700108M19Rik	TRCN0000198393	3.58018	3.92084	4.60129	4.21623		3.22267	3.643	2.28267	0.357517	-0.0628214	1.29752	0.530738	0.696516		3.78873	3.15071	2.38645	0.132107	0.77013	1.53439	0.812209	0.702088		1.54811	4.1375	3.00042	3.05317	0.46379	1.60086	1.70594	1.29789		3.9811	1.88162	2.42325	0.235129	2.33461	1.79297	1.45424	1.08996		0.530738	0.812209	1.70594	1.45424	0.671473	1.58009
CTGTTCGCTCACTCGTTAGAA	1700108M19Rik	TRCN0000182195	1.11595	2.19287	2.03252	1.5208		1.66133	1.5925	1.50556	-0.545388	-0.476557	-0.389617	-0.470521	0.0780608		1.6522	0.791515	2.274	0.540677	1.40136	-0.0811261	0.620303	0.744443		0.550406	0.249307	1.31686	1.48212	1.78322	0.715658	1.327	0.550424		2.32959	1.89487	1.5291	-0.808799	-0.37407	-0.00830031	-0.397057	0.400744		-0.470521	0.620303	1.327	-0.397057	0.074891	0.46497
GTGATTCAATCAGTAGCATTT	1700108M19Rik	TRCN0000197853	4.07803	4.31186	4.94543	4.16703		4.79368	3.9571	4.7432	-0.715647	0.120928	-0.665169	-0.419963	0.469104		5.10314	4.98774	5.34534	-0.791274	-0.675876	-1.03348	-0.833542	0.182509		4.61023	6.14686	5.2683	0.335205	-1.20143	-0.322869	-0.396365	0.77095		5.41307	3.55748	4.56496	-1.24604	0.609554	-0.397932	-0.344807	0.928939		-0.419963	-0.833542	-0.396365	-0.344807	-0.626752	-0.370586
GATGACGTTCACCAGCATGAA	1700108M19Rik	TRCN0000182337	3.19717	3.53276	4.03532	3.16949		2.17588	1.03773	0.975586	1.02129	2.15945	2.22159	1.80077	0.675768		0	0.28977	0	3.53276	3.24299	3.53276	3.43617	0.167299		1.80256	1.73401	1.89652	2.23276	2.30131	2.1388	2.22429	0.0815857		0	1.31926	0.492412	3.16949	1.85023	2.67708	2.5656	0.666657		1.80077	3.43617	2.22429	2.5656	2.61847	2.39494
GTCCATAAAGTGTCCACCTCT	1700110I01Rik	TRCN0000078997	3.28138	2.8794	3.69473	3.38561		3.63472	3.62904	3.7683	-0.353343	-0.34766	-0.486919	-0.395974	0.0788119		2.30504	3.76046	2.6278	0.574359	-0.881064	0.251596	-0.0183695	0.764346		0.261916	3.84731	3.61461	3.43281	-0.152578	0.0801213	1.12012	2.00623		1.96479	3.57815	0.453979	1.42082	-0.192536	2.93163	1.38664	1.56237		-0.395974	-0.0183695	1.12012	1.38664	-0.207172	1.25338
CGGCTCTGAAATAATGAGAAA	1700110I01Rik	TRCN0000078993	0.17595	0.0995552	0.272694	0.0965863		0.265303	0	0	-0.0893531	0.17595	0.17595	0.0875154	0.153173		0	0.25177	0.0398466	0.0995552	-0.152215	0.0597085	0.00234952	0.135332		0.0470894	0	0	0.225604	0.272694	0.272694	0.256997	0.0271871		0	0	0.102944	0.0965863	0.0965863	-0.00635757	0.0622717	0.0594347		0.0875154	0.00234952	0.256997	0.0622717	0.0449325	0.159634
GCACTGTAGAGGTGGCATAAT	1700110I01Rik	TRCN0000078994	3.34722	3.64413	3.68476	3.41401		3.26656	3.27271	3.34562	0.0806522	0.0745069	0.00159317	0.0522508	0.0439782		3.30431	3.58438	3.08359	0.339814	0.0597464	0.560536	0.320032	0.25098		3.9997	3.38291	1.45974	-0.314936	0.301847	2.22502	0.737311	1.32479		6.20464	4.35332	2.72708	-2.79063	-0.939313	0.686921	-1.01434	1.73999		0.0522508	0.320032	0.737311	-1.01434	0.186141	-0.138515
CCGAAGCTAAACAGCACTGTA	1700110I01Rik	TRCN0000078996	3.59961	3.34266	3.29249	3.39514		4.22784	4.81285	4.50648	-0.628235	-1.21325	-0.906874	-0.916118	0.292615		3.71076	4.55646	3.83816	-0.368102	-1.21381	-0.495505	-0.692471	0.455961		4.37903	4.22741	4.55647	-1.08654	-0.934925	-1.26398	-1.09515	0.164698		3.99107	4.45742	5.71262	-0.595934	-1.06228	-2.31749	-1.32523	0.890389		-0.916118	-0.692471	-1.09515	-1.32523	-0.804294	-1.21019
AGGTGGCATAATGGACCAGAA	1700110I01Rik	TRCN0000078995	3.58798	3.6023	3.02914	2.88169		3.41828	4.22653	4.03294	0.169709	-0.638547	-0.444955	-0.304598	0.422012		4.05101	4.35389	4.23564	-0.448709	-0.751588	-0.633338	-0.611212	0.152647		4.87452	5.79972	5.18204	-1.84538	-2.77057	-2.15289	-2.25628	0.471184		2.66482	3.28812	2.96432	0.216873	-0.406429	-0.0826305	-0.090729	0.31173		-0.304598	-0.611212	-2.25628	-0.090729	-0.457905	-1.17351
AGCTGCCCAAGTTGAAGTTTC	1700112E06Rik	TRCN0000352473	1.62074	1.147	1.26122	3.7767		0.397532	0.566928	1.26477	1.22321	1.05381	0.355964	0.87766	0.459673		2.25964	0.498876	1.57934	-1.11264	0.648125	-0.432334	-0.29895	0.887929		0	1.46498	0.0906321	1.26122	-0.203763	1.17059	0.742681	0.820896		1.15875	0	0	2.61794	3.7767	3.7767	3.39044	0.669007		0.87766	-0.29895	0.742681	3.39044	0.289355	2.06656
CCCTCAACAAGAACCAAATTA	1700112E06Rik	TRCN0000341221	2.53585	1.83671	1.79369	2.84044		1.7506	2.48622	1.47353	0.785254	0.0496348	1.06232	0.632404	0.523361		1.24958	2.4205	4.67265	0.587133	-0.583789	-2.83594	-0.944198	1.73976		0.0926903	0	0	1.701	1.79369	1.79369	1.7628	0.0535148		2.45741	1.72729	0	0.383031	1.11316	2.84044	1.44554	1.26197		0.632404	-0.944198	1.7628	1.44554	-0.155897	1.60417
GAAGGATGAGGAAGACTATAA	1700112E06Rik	TRCN0000341220	2.68879	4.1702	3.99823	3.55241		3.17278	3.22244	2.33709	-0.483992	-0.533651	0.351704	-0.22198	0.497445		3.0347	1.87552	2.76489	1.1355	2.29468	1.40532	1.61183	0.606557		1.48111	2.9963	2.93466	2.51712	1.00193	1.06357	1.52754	0.857556		2.19798	0.0482165	3.3827	1.35443	3.50419	0.169709	1.67611	1.69036		-0.22198	1.61183	1.52754	1.67611	0.694926	1.60183
[truncated: 91,463 more rows]
[truncated: 2 more columns]
