# Supplementary material for: Altered Mitochondria Functionality Defines a Metastatic Cell State in Lung Cancer and Creates an Exploitable Vulnerability
Source: Oxford University Press journal article supplement (doi:10.1158/0008-5472.can-20-1865), 2020-11-25
Supplement: 00085472can201865-sup-244539_2_supp_6715424_qjmwr8.xlsx [file 00085472can201865-sup-244539_2_supp_6715424_qjmwr8.xlsx]

## Sheet: Table S7
Table S7: Secondry in vitro Screen analysis.This table shows the change in shRNA abundance upon in vitro proliferation of candidate genes screened in this study. Each value represents the reads for that shRNA/total reads from that samples per million (log2).
			368T1 Non-meta		394T4 Non-meta		238N1 metastasis		482N1 metastasis		404M1 metastasis		2691M1 metastasis		368T1 Non-meta		394T4 Non-meta		238N1 metastasis		482N1 metastasis		404M1 metastasis		2691M1 metastasis			368T1 Non-meta		394T4 Non-meta		238N1 metastasis		482N1 metastasis		404M1 metastasis		2691M1 metastasis
Hairpin Sequence	Hairpin IDs	Gene Symbol	Early Time point, Replicate1	Early Time point, Replicate2	Early Time point, Replicate1	Early Time point, Replicate2	Early Time point, Replicate1	Early Time point, Replicate2	Early Time point, Replicate1	Early Time point, Replicate2	Early Time point, Replicate1	Early Time point, Replicate2	Early Time point, Replicate1	Early Time point, Replicate2	Late Time point, Replicate1	Late Time point, Replicate2	Late Time point, Replicate1	Late Time point, Replicate2	Late Time point, Replicate1	Late Time point, Replicate2	Late Time point, Replicate1	Late Time point, Replicate2	Late Time point, Replicate1	Late Time point, Replicate2	Late Time point, Replicate1	Late Time point, Replicate2		Early-Late (Replicate1)	Early-Late (Replicate2)	Early-Late (Replicate1)	Early-Late (Replicate2)	Early-Late (Replicate1)	Early-Late (Replicate2)	Early-Late (Replicate1)	Early-Late (Replicate2)	Early-Late (Replicate1)	Early-Late (Replicate2)	Early-Late (Replicate1)	Early-Late (Replicate2)		Average diff TnonMet	Average diff Metastasis	Tmet-TnonMet	T Test
GCAGGTATTTGACATACTAAA	TRCN0000009511	Nfkb1	10.21	10.3192	10.2239	10.1994	10.2071	10.2621	10.3051	10.266	10.2514	10.2923	10.1904	10.153	10.0342	9.69801	9.60333	9.90063	9.68574	7.07588	8.0345	7.50506	12.2446	15.1812	9.20113	10.5186		0.175748	0.621148	0.620581	0.298784	0.521321	3.18621	2.27059	2.7609	-1.9932	-4.88895	0.989272	-0.365607		0.429065	0.310069	-0.118996	0.905228
GCACCATAAACACCAAATTTA	TRCN0000009513	Nfkb1	9.58865	9.68212	9.57061	9.61625	9.6048	9.63396	9.61278	9.57437	9.56986	9.58614	9.539	9.44876	9.35542	9.54837	8.82148	8.75996	5.37411	6.22913	7.39388	7.70826	7.85385	11.152	6.103	5.95112		0.233225	0.133756	0.749124	0.856292	4.23069	3.40483	2.2189	1.86611	1.71602	-1.56586	3.43599	3.49764		0.493099	2.35054	1.85744	0.0237585
CCGGAGTCAGTATCCAGAAAT	TRCN0000012009	Ndufaf4	10.5623	10.575	10.6031	10.5263	10.6239	10.5214	10.4943	10.5152	10.5491	10.4955	10.7098	10.6136	10.0567	10.4068	10.6575	10.2425	9.14598	9.06809	9.07903	9.14408	9.33129	9.58309	7.44558	9.8373		0.505584	0.168148	-0.0543494	0.28379	1.47792	1.45329	1.41524	1.37109	1.21776	0.912391	3.26422	0.776277		0.225793	1.48602	1.26023	0.00198245
GCTCAAGAGTACTATTTAGAA	TRCN0000012011	Ndufaf4	10.6556	10.7363	10.7355	10.755	10.7231	10.7997	10.7449	10.7053	10.729	10.7382	10.6714	10.6322	9.74909	9.92381	9.6361	9.63443	6.86058	8.2009	8.89324	8.68039	9.28202	10.6021	8.19428	8.52974		0.906471	0.812511	1.09939	1.12052	3.86257	2.59878	1.85166	2.02486	1.44699	0.136171	2.47715	2.1025		0.984725	2.06258	1.07786	0.0236786
GCTGAAGGTCAAGTGTCTGAA	TRCN0000012379	Fkbp8	9.53214	9.45336	9.54467	9.5564	9.57664	9.44214	9.39106	9.42789	9.54265	9.49112	9.66128	9.77985	9.17685	9.30843	9.66627	9.53208	7.96637	11.7348	9.18766	8.67475	8.28854	9.24781	7.77619	8.38003		0.355289	0.144935	-0.121598	0.0243168	1.61027	-2.29269	0.203398	0.753132	1.2541	0.243311	1.88509	1.39982		0.100736	0.632054	0.531319	0.303335
GATGGTGAAGAGCAGAATAAA	TRCN0000012386	Ywhae	9.63889	9.69751	9.63451	9.65148	9.68744	9.68605	9.69412	9.67363	9.6904	9.67298	9.62924	9.62005	7.96377	8.14848	6.8053	5.71477	6.29509	5.92526	6.69816	6.05355	6.98548	7.5547	7.54938	4.57356		1.67512	1.54903	2.82921	3.93671	3.39235	3.76079	2.99596	3.62007	2.70492	2.11828	2.07986	5.04649		2.49752	3.21484	0.717325	0.3215
GCTGAGTGAAGAAAGCTATAA	TRCN0000012387	Ywhae	9.97968	10.1158	10.0442	10.095	10.0276	10.0879	10.0496	9.99794	10.0157	10.0092	10.0045	9.87866	8.32234	7.93212	7.44699	6.79966	4.30664	5.81782	3.53934	5.07083	4.32072	4.37759	3.80044	5.54868		1.65734	2.1837	2.59724	3.2953	5.72094	4.2701	6.51025	4.92711	5.69501	5.63164	6.20407	4.32997		2.4334	5.41114	2.97774	0.000270035
GCTTTGGTACTACAGAACTTT	TRCN0000012628	Raf1	10.2858	10.4107	10.3559	10.4077	10.3372	10.3551	10.3265	10.3225	10.4177	10.3401	10.4332	10.3739	8.47823	8.48048	8.05608	8.91164	7.66494	4.99926	8.6672	7.94218	7.52972	7.56363	8.63277	9.93771		1.80759	1.93019	2.29981	1.49603	2.6723	5.3558	1.65932	2.38035	2.88795	2.77646	1.80045	0.436206		1.8834	2.4961	0.6127	0.275142
CGGAATGGAATGAGCTTACAT	TRCN0000012631	Raf1	9.63738	9.70024	9.72026	9.58464	9.66798	9.62008	9.58574	9.68509	9.64059	9.63318	9.75674	9.60981	8.77046	8.50296	9.11525	9.64536	6.5944	8.64731	8.88593	9.01465	8.26338	9.5866	7.98631	10.4903		0.866915	1.19728	0.605006	-0.0607245	3.07357	0.97277	0.699811	0.670445	1.37721	0.0465821	1.77043	-0.880466		0.652118	0.966294	0.314176	0.538914
CCAACAAGAAGACCTCTTGAA	TRCN0000012713	Pkn2	0	0	0	0	0	0	0	0	0	0	0	0	0	0	0	0	0	0	0	0	0	0	0	0		0	0	0	0	0	0	0	0	0	0	0	0		0	0	0
GCTACAGGATAGCAAGACAAA	TRCN0000012717	Pkn2	9.73298	9.81147	9.77307	9.79089	9.77629	9.80483	9.79234	9.78438	9.7608	9.86644	9.82703	9.79107	9.40495	9.21435	9.17103	9.12652	7.04668	8.00907	7.19311	6.81465	9.72912	8.7442	10.6631	6.47798		0.328031	0.597116	0.60204	0.664366	2.72962	1.79576	2.59923	2.96972	0.031684	1.12224	-0.836087	3.31309		0.547888	1.71566	1.16777	0.0634238
GCCGACTATATGGACTGCTTA	TRCN0000012774	Cul2	10.5828	10.5936	10.5963	10.6204	10.6477	10.4959	10.4631	10.4936	10.6164	10.5151	10.7776	10.8249	10.7637	10.5828	10.2773	10.4289	9.63049	10.9255	11.2798	11.4804	9.11039	10.5707	8.91961	10.3103		-0.180866	0.0107444	0.319042	0.191465	1.01725	-0.42962	-0.816697	-0.986761	1.50599	-0.0555886	1.85795	0.514656		0.0850963	0.325896	0.2408	0.557202
GCGACGTTCTTCAGACATCAT	TRCN0000012799	Anapc2	10.719	10.7291	10.6881	10.8645	10.9595	10.5706	10.4803	10.6244	10.8185	10.6306	11.0973	11.117	10.1582	10.1381	9.4422	9.72349	7.8852	8.91661	7.37658	7.13247	10.2498	9.35049	8.54819	8.68547		0.560743	0.591056	1.24589	1.14103	3.07433	1.65403	3.10368	3.49194	0.568737	1.28012	2.54909	2.43157		0.884679	2.26919	1.38451	0.00662016
CCACGTACAGAGATTCTTCTA	TRCN0000012802	Anapc2	10.7554	10.7783	10.7199	10.7113	10.6819	10.8243	10.8285	10.7952	10.757	10.7638	10.6248	10.582	10.7	10.7937	10.0021	10.5925	8.87618	8.88235	8.8406	8.32477	10.2534	10.7234	9.40464	10.2489		0.0554243	-0.0154654	0.717769	0.118738	1.80575	1.94194	1.9879	2.47042	0.503553	0.0403382	1.22019	0.333099		0.219116	1.2879	1.06878	0.0145532
GCCATCAAGGTGACTCACAAA	TRCN0000022470	Limk2	10.0579	10.1806	10.157	10.1422	10.1622	10.1494	10.0493	10.0915	10.2361	10.0985	10.2575	10.409	8.9684	8.54492	8.64256	8.33855	8.02001	6.43707	8.01675	7.79226	9.41566	9.7288	8.3114	10.7394		1.08947	1.63566	1.51446	1.80366	2.1422	3.71231	2.03256	2.29928	0.820413	0.369667	1.94611	-0.330391		1.51081	1.62402	0.113206	0.817749
GTGAGATCATTGGGCAGGTAT	TRCN0000022471	Limk2	6.93373	7.11254	7.13215	7.19681	7.226	7.00969	6.88155	7.06286	7.00438	6.98556	7.28069	7.33902	8.01392	7.43338	7.20329	7.03144	6.01415	7.87254	6.70372	6.52818	7.3646	8.04906	7.31702	6.79065		-1.08019	-0.320837	-0.0711426	0.165367	1.21185	-0.862844	0.17783	0.534677	-0.360226	-1.06349	-0.0363303	0.548363		-0.3267	0.0187289	0.345429	0.391125
GCCAGTGTGAAGCATGATATA	TRCN0000022485	Ripk2	9.7809	9.92317	9.86011	9.91324	9.83884	9.89833	9.78258	9.80593	9.88533	9.85156	9.91584	9.79378	9.83465	9.26963	9.08429	9.18054	5.97606	8.34202	8.46025	7.20208	9.53476	9.23389	7.33096	8.21198		-0.0537457	0.653547	0.77582	0.732697	3.86278	1.55631	1.32233	2.60385	0.350576	0.617669	2.58489	1.58181		0.52708	1.81003	1.28295	0.0187968
GCATGATGTCACTCTCTCAAT	TRCN0000022487	Ripk2	10.2961	10.4318	10.3985	10.4652	10.3945	10.4563	10.3595	10.4452	10.4525	10.4305	10.4046	10.4318	8.69632	8.81696	9.14716	8.8671	8.54728	8.55552	8.41098	8.82402	8.34909	9.1616	8.01422	8.74895		1.5998	1.61489	1.25131	1.59812	1.84722	1.9008	1.9485	1.6212	2.10337	1.2689	2.39035	1.68287		1.51603	1.8454	0.329369	0.0503515
GTGACCATTGAGGGAATGATT	TRCN0000022576	Acvr1b	9.44646	9.43578	9.45832	9.58414	9.60339	9.35614	9.30373	9.32849	9.53728	9.48061	9.71504	9.78168	7.49518	7.37031	7.35735	6.76207	4.85009	3.77249	5.16517	5.73741	4.73151	5.19647	4.33096	3.37562		1.95128	2.06547	2.10097	2.82206	4.7533	5.58365	4.13856	3.59109	4.80577	4.28414	5.38409	6.40606		2.23495	4.86833	2.63339	3.63627e-05
GCAGGAAGATGTGAAGATTTA	TRCN0000022578	Acvr1b	10.3828	10.4758	10.3968	10.4161	10.4008	10.4666	10.4465	10.4162	10.3989	10.4043	10.3921	10.3284	9.7853	10.6165	9.84212	10.0441	7.27365	7.95599	11.2205	9.2331	8.36563	8.87985	7.79643	7.06294		0.597541	-0.140643	0.554639	0.372007	3.12716	2.51063	-0.774039	1.18311	2.03323	1.52447	2.59565	3.2655		0.345886	1.93321	1.58733	0.0111519
CGTCTTCACGAGGGATGATTT	TRCN0000022648	Ankk1	11.3093	11.3101	11.3314	11.3549	11.4181	11.213	11.2204	11.2475	11.3277	11.2592	11.4158	11.4174	10.9651	10.5385	11.3435	11.363	11.4022	10.5024	12.1953	11.5219	9.89361	11.1118	8.39472	10.9786		0.344255	0.771564	-0.0121091	-0.00806618	0.0158807	0.710533	-0.974889	-0.274448	1.43404	0.147461	3.02103	0.438823		0.273911	0.564803	0.290892	0.550137
GCTGAGATTGTGTCTGCTTTA	TRCN0000022736	Pdpk1	10.08	10.1134	10.1077	10.1463	10.1639	10.0899	10.0294	10.0625	10.122	10.048	10.1523	10.0964	6.89001	6.39018	6.75845	7.44384	3.88134	6.70976	4.91017	5.00044	7.95573	12.3275	6.29158	7.426		3.18996	3.72318	3.34929	2.70243	6.28255	3.38011	5.1192	5.06209	2.16628	-2.27944	3.86068	2.67041		3.24122	3.28273	0.041519	0.966387
CGACAGTTATTACTCACAGAA	TRCN0000022738	Pdpk1	10.9555	10.9914	10.9147	10.9625	10.9588	10.9551	10.9285	10.9435	10.932	10.9237	10.8747	10.8672	6.84035	6.40762	6.2217	5.93341	5.36676	6.06965	8.59125	4.69347	5.41913	7.14026	5.63052	8.15955		4.11518	4.58379	4.69297	5.02909	5.59207	4.88544	2.33721	6.25	5.51286	3.78342	5.24414	2.7077		4.60526	4.5391	-0.0661521	0.905408
GATCAGCAAGACTGTGGAATA	TRCN0000022825	Rps6ka1	9.50263	9.5382	9.52278	9.56097	9.50848	9.4533	9.49387	9.53642	9.57021	9.55558	9.69661	9.649	7.95446	7.84842	7.49485	7.31711	3.72933	6.06339	5.05639	6.18102	5.55519	7.94214	7.0433	7.22283		1.54816	1.68978	2.02792	2.24386	5.77915	3.38991	4.43748	3.35541	4.01502	1.61343	2.65331	2.42617		1.87743	3.45874	1.5813	0.0106726
CTACATACTCTGCTCTCAATA	TRCN0000022827	Rps6ka1	11.6086	11.6759	11.6242	11.6354	11.5946	11.7174	11.6952	11.693	11.6071	11.687	11.4812	11.4577	10.2234	10.4141	10.9072	10.2153	9.38596	9.37272	8.08862	8.1256	11.914	12.7564	9.56598	9.94189		1.38524	1.26179	0.716949	1.42008	2.20866	2.34469	3.60654	3.5674	-0.306863	-1.06947	1.91522	1.51584		1.19602	1.72275	0.526735	0.415401
GCAGAGTAGAAGAGATGATTT	TRCN0000023765	Csnk1g3	10.4493	10.5494	10.5092	10.5533	10.4716	10.5972	10.5494	10.5411	10.526	10.5343	10.5284	10.425	8.18782	8.88311	8.45392	10.1323	5.8019	6.82153	6.72301	6.18102	7.04576	12.9044	5.16657	8.24429		2.26143	1.66634	2.05528	0.421077	4.66971	3.77564	3.82637	4.36009	3.4802	-2.37006	5.3618	2.18073		1.60103	3.16056	1.55953	0.133548
CCAGCAAGTCATTCATATCAT	TRCN0000023767	Csnk1g3	7.85934	7.98044	7.781	7.79564	7.79373	7.93642	7.96557	7.9004	7.8141	7.85868	7.76645	7.50582	5.85292	4.62815	5.81611	4.5579	2.55941	4.62729	1.58825	5.2433	4.14015	6.53485	3.11594	4.53608		2.00641	3.35229	1.96489	3.23774	5.23432	3.30912	6.37733	2.6571	3.67395	1.32383	4.65051	2.96974		2.64033	3.77449	1.13415	0.12595
GCTCTGGAGTATCTCCATGAA	TRCN0000023786	Vrk3	9.93219	9.95781	10.0179	9.98499	9.95441	9.91787	9.9286	9.95579	10.0789	9.96748	10.1272	10.188	9.5151	9.39511	10.5706	9.8725	7.45423	8.69059	9.1274	9.5313	9.1828	9.2119	10.2034	8.23262		0.417092	0.562698	-0.552649	0.112496	2.50018	1.22727	0.801199	0.424488	0.896062	0.755582	-0.0761638	1.9554		0.134909	1.0605	0.925594	0.0378232
CAAGTACAGGTTCCTAGTATT	TRCN0000023788	Vrk3	10.2331	10.3291	10.3442	10.2947	10.2313	10.3374	10.3695	10.3331	10.3577	10.3739	10.2997	10.3812	9.71642	10.2702	10.5107	10.6986	7.44728	7.32119	8.54011	7.76598	8.09249	10.7026	7.62826	8.54397		0.516692	0.0588467	-0.166524	-0.403869	2.78399	3.01619	1.82939	2.56711	2.26519	-0.328688	2.67145	1.83719		0.00128627	2.08023	2.07894	0.000687174
GCCATTAAACTGGAACCAATA	TRCN0000023799	Csnk1g1	10.2906	10.3735	10.3332	10.3676	10.3236	10.3445	10.3216	10.3298	10.3832	10.3208	10.3421	10.3616	9.81486	9.61742	9.42818	9.88178	7.18251	9.17137	8.23498	7.85677	8.36151	8.47361	8.47098	9.84657		0.475763	0.756105	0.905037	0.485828	3.14107	1.17311	2.0866	2.47308	2.0217	1.84721	1.87114	0.514989		0.655683	1.89111	1.23543	0.00270288
CCAATGAATATGTAGCCATTA	TRCN0000023801	Csnk1g1	10.9067	10.8951	10.8075	10.7682	10.7736	10.9244	10.9508	10.936	10.8067	10.8852	10.6644	10.5566	11.7338	12.3281	11.1576	11.8442	11.2166	10.6172	7.68558	7.80951	12.538	11.4668	8.11433	11.7513		-0.827035	-1.433	-0.350066	-1.07597	-0.442976	0.307261	3.26526	3.12651	-1.73132	-0.581671	2.55012	-1.19463		-0.921518	0.662319	1.58384	0.0660474
GCCTTAAACAAGAAAGCTATT	TRCN0000023939	Mtor	10.2326	10.3361	10.2812	10.2999	10.2996	10.3203	10.3207	10.2688	10.2836	10.3381	10.2263	10.1635	7.25096	6.74248	6.48811	6.39284	3.30664	3.38783	2.89081	2.84844	4.06108	5.83259	3.30859	3.91265		2.98166	3.59362	3.79308	3.90703	6.99294	6.93248	7.42987	7.42035	6.22252	4.50556	6.91775	6.25086		3.56885	6.58404	3.01519	1.82775e-05
CCCAATATTTCGGGATTTCTT	TRCN0000025210	Pak2	12.2167	12.2167	12.1732	12.0956	12.1505	12.2352	12.234	12.2384	12.1451	12.2076	12.0394	12.0062	11.4815	11.5937	11.8584	11.5544	10.3195	11.8401	11.4925	11.7108	12.0434	11.0858	11.3987	11.9598		0.735261	0.622991	0.314794	0.541181	1.83093	0.395106	0.741515	0.527624	0.101754	1.12183	0.64071	0.0464479		0.553557	0.67574	0.122183	0.598435
CCAGATGTACTGCTTAGTAAA	TRCN0000025616	Pik3ca	10.746	10.7937	10.7521	10.7704	10.7048	10.8525	10.8406	10.8147	10.7697	10.7961	10.6309	10.5168	9.23086	8.79394	9.21712	8.41722	8.3143	7.14568	8.77081	8.29445	7.48498	7.66174	6.76392	8.09013		1.51513	1.99975	1.53498	2.35318	2.39053	3.70685	2.06981	2.5202	3.28469	3.13436	3.86694	2.42669		1.85076	2.92501	1.07425	0.00669984
GCCTTTCAATCTGCTCTGTTA	TRCN0000025618	Pik3ca	9.81533	9.88241	9.83132	9.91959	9.91539	9.7913	9.71684	9.72719	9.84308	9.78083	10.0226	10.0713	7.94861	6.79311	7.32934	9.61465	8.14759	8.22493	8.35731	7.31755	7.07875	8.15097	7.88224	6.20304		1.86671	3.0893	2.50198	0.304944	1.7678	1.56637	1.35952	2.40964	2.76432	1.62986	2.14036	3.86823		1.94073	2.18826	0.247529	0.72741
GTGAAGTATTTGAGGCCATTA	TRCN0000025664	Csnk2a2	9.63019	9.64633	9.68649	9.65576	9.75959	9.57854	9.57297	9.65604	9.76172	9.66216	9.77442	9.96819	9.72055	8.93813	9.29932	8.93059	7.35197	9.46583	6.98285	7.23054	7.6083	8.83259	8.67272	7.29378		-0.0903552	0.708201	0.387162	0.725176	2.40762	0.112707	2.59012	2.4255	2.15342	0.829574	1.1017	2.67441		0.432546	1.78688	1.35433	0.0063099
GTATGATTATAGCTTGGACAT	TRCN0000025666	Csnk2a2	10.1667	10.2062	10.1789	10.1611	10.2251	10.2194	10.1876	10.254	10.1771	10.2042	10.173	10.2376	8.23951	8.09567	8.36104	7.51335	7.03746	7.68143	7.63846	8.57535	5.14015	6.15924	4.76802	4.80122		1.9272	2.11049	1.81786	2.64773	3.18763	2.53794	2.5491	1.67869	5.03691	4.04499	5.40503	5.4364		2.12582	3.73459	1.60877	0.0172843
GCAGAGCAGTTACGAATAGAA	TRCN0000025669	Wee1	10.9961	11.1256	11.0027	11.1357	11.0885	11.046	10.9732	11.0164	11.0517	11.0158	11.1245	10.982	6.99815	7.88777	6.8295	6.59162	6.51693	10.0389	7.79249	10.178	6.61869	7.68649	5.46846	8.53924		3.99796	3.23783	4.17319	4.54413	4.57161	1.00711	3.18068	0.838353	4.43297	3.32928	5.65599	2.44277		3.98828	3.18234	-0.80593	0.25438
GCAACATGAAGTCACGGTATA	TRCN0000025672	Wee1	9.82132	9.90908	9.90779	9.94276	9.96269	9.88865	9.84046	9.85863	9.92009	9.90398	9.88089	9.91791	5.77576	5.98824	6.92744	5.74076	3.53341	7.90965	6.67288	5.75176	2.86553	6.7536	3.51804	-0.296808		4.04556	3.92084	2.98035	4.202	6.42928	1.97901	3.16758	4.10687	7.05456	3.15037	6.36285	10.2147		3.78719	5.30815	1.52097	0.164709
CCCATTTGGTTCCAAGCAGAA	TRCN0000025884	Smad1	0	0	0	0	0	0	0	0	0	0	0	0	0	0	0	0	0	0	0	0	0	0	0	0		0	0	0	0	0	0	0	0	0	0	0	0		0	0	0	#DIV/0!
TCCTATTTCATCCGTGTCTTA	TRCN0000025933	Smad1	0	0	0	0	0	0	0	0	0	0	0	0	0	0	0	0	0	0	0	0	0	0	0	0		0	0	0	0	0	0	0	0	0	0	0	0		0	0	0	#DIV/0!
GCAGCCAAATTAGCTGTTGAT	TRCN0000027026	Eif2ak2	9.88784	9.95872	9.92458	9.98234	10.0415	9.82214	9.7642	9.84847	9.96844	9.80666	10.1305	10.2067	10.5167	10.1751	9.66104	10.129	8.27953	8.7336	10.4035	9.4036	8.67621	9.87985	8.18203	8.5666		-0.628836	-0.216408	0.263547	-0.146643	1.76193	1.08854	-0.639326	0.444875	1.29223	-0.0731838	1.94848	1.64011		-0.182085	0.932958	1.11504	0.0146672
CGCCAGGTTTAACAGCGATTT	TRCN0000027041	Eif2ak2	9.34984	9.24407	9.2592	9.36383	9.48413	9.10409	9.03678	9.13213	9.31214	9.13943	9.63985	9.83684	9.15467	8.44925	8.13911	7.83428	8.35753	9.02042	8.36786	8.32717	8.26006	8.8451	7.35844	9.16978		0.195165	0.794821	1.12009	1.52955	1.1266	0.0836723	0.668926	0.804958	1.05208	0.294325	2.28141	0.667067		0.909907	0.87238	-0.0375264	0.921497
CCTTTGTAATAGGAACAACAT	TRCN0000027687	Plcl1	4.61915	4.48093	4.36897	4.56402	4.51451	3.97352	4.50499	4.5037	4.35585	4.4154	4.15258	4.24161	4.17485	4.29503	3.47794	4.04889	0	0	0.85128	2.90091	2.71869	-0.513185	3.47851	0.873117		0.444301	0.185905	0.891032	0.515131	4.51451	3.97352	3.65371	1.6028	1.63716	4.92858	0.674069	3.36849		0.509092	3.0441	2.53501	0.00209226
CCTTACGAGAAGCCATAGATA	TRCN0000027719	Plcl1	9.82099	9.88625	9.869	9.7809	9.81341	10.0653	9.90452	9.86313	9.88336	9.80245	9.77693	9.6839	8.72466	8.50194	9.15623	8.65108	5.6038	6.83261	6.7555	5.73018	7.42703	8.8473	5.70091	7.45306		1.09633	1.38431	0.712771	1.12981	4.20961	3.23267	3.14902	4.13295	2.45633	0.955152	4.07603	2.23084		1.0808	3.05533	1.97452	0.00140718
GCTGCTTCTAAGAAACTTTAT	TRCN0000028221	Mctp1	7.72661	7.91238	7.83132	7.88107	7.84124	7.81587	7.8961	7.77725	7.90351	7.79787	7.91508	7.71638	7.22216	6.76971	8.09432	9.05667	3.6347	7.10055	4.18915	7.79399	4.70575	5.72203	2.55652	4.62205		0.504456	1.14268	-0.263	-1.17559	4.20654	0.715325	3.70695	-0.0167403	3.19776	2.07584	5.35857	3.09433		0.052135	2.79232	2.74019	0.0071148
CCACTGAGATACATTGTTCTT	TRCN0000028249	Mctp1	10.6894	10.6624	10.6055	10.5193	10.5878	10.7309	10.717	10.6971	10.5857	10.6532	10.4311	10.4031	11.2937	10.5288	10.9245	10.6301	9.89671	10.9013	9.2979	8.71377	8.42012	8.58397	9.28801	7.85927		-0.604245	0.133549	-0.319012	-0.110828	0.691045	-0.170425	1.4191	1.98333	2.16559	2.06925	1.14308	2.54378		-0.225134	1.48059	1.70573	0.000822296
CCAATGTGGATTACTTGCTTT	TRCN0000028758	Stk31	12.4493	12.4638	12.4668	12.4149	12.3853	12.475	12.5046	12.4795	12.453	12.4745	12.3442	12.336	12.6816	12.5067	12.9821	12.5459	13.8508	14.0836	12.89	12.5699	11.186	12.1359	11.2751	11.9674		-0.232328	-0.0429289	-0.515371	-0.13104	-1.46551	-1.60859	-0.385403	-0.0903339	1.26698	0.338573	1.06915	0.368553		-0.230417	-0.0633232	0.167094	0.678417
GCATCCCAACATTGTGCATAT	TRCN0000028805	Stk36	8.79721	8.86354	8.90433	8.81875	8.83403	8.82527	8.83889	8.8071	8.89571	8.81261	8.9219	8.93441	9.28663	8.83398	8.20329	9.16223	11.1879	5.92526	7.86623	7.54888	6.61524	7.67334	7.66174	7.33255		-0.489419	0.0295568	0.701044	-0.343474	-2.35382	2.90001	0.97266	1.25822	2.28047	1.13927	1.26017	1.60186		-0.0255732	1.13235	1.15793	0.0885116
GCCGTATAGTTGTGGCTTCTA	TRCN0000028810	Stk36	6.85025	6.85866	6.92424	6.90527	6.98916	6.70823	6.86192	6.72061	6.80699	6.8908	7.11341	7.04289	6.49678	6.69002	6.06743	6.7789	6.68279	8.31725	5.58222	6.30787	6.10609	5.38567	6.63502	7.39842		0.353472	0.168644	0.856811	0.126368	0.306369	-1.60902	1.2797	0.412733	0.700897	1.50513	0.478393	-0.355534		0.376324	0.339834	-0.0364893	0.926251
CCAGGAGTACATCAACCTCTT	TRCN0000030529	H13	10.5439	10.5324	10.5304	10.4771	10.4849	10.5095	10.5679	10.5437	10.5105	10.5192	10.5274	10.4147	9.81999	9.99186	9.77585	9.71039	8.0706	8.93043	9.51068	9.63368	9.11223	9.27852	7.91221	8.54868		0.723875	0.540531	0.754561	0.766718	2.41431	1.5791	1.05718	0.909993	1.3983	1.2407	2.61516	1.86599		0.696421	1.63509	0.938669	0.00337259
CTATGACATCTTCTGGGTATT	TRCN0000030533	H13	10.4503	10.4723	10.4415	10.365	10.4138	10.4981	10.4744	10.47	10.3985	10.4707	10.3393	10.2438	9.4619	9.73171	9.5646	10.3509	9.49015	7.82153	7.64858	8.19158	8.59521	8.09538	7.32818	11.9594		0.988429	0.740623	0.876905	0.0140798	0.923618	2.67653	2.82583	2.2784	1.80327	2.3753	3.01112	-1.71559		0.655009	1.77231	1.1173	0.0924668
GCACGATTTAGTGGAACAAAT	TRCN0000031156	Nln	10.3695	10.5024	10.417	10.4445	10.419	10.4444	10.3656	10.4216	10.4112	10.3641	10.397	10.4598	9.52692	9.48869	8.84476	8.76735	8.81072	4.9044	5.89081	6.19158	7.2842	8.0516	8.75567	8.79198		0.842585	1.01367	1.57225	1.67711	1.60827	5.54003	4.47478	4.22997	3.12703	2.31252	1.64131	1.66784		1.2764	3.07522	1.79882	0.0125344
GCGAACTTACTTCCATGAGTT	TRCN0000031158	Nln	10.0371	10.0553	10.0237	10.1668	10.1245	9.99068	9.84015	9.98495	10.1001	9.99698	10.2107	10.3401	10.8435	10.797	10.2692	9.93153	8.06153	9.31132	9.09234	7.90091	8.83094	9.75516	7.73485	9.58507		-0.806352	-0.741772	-0.245477	0.235239	2.06302	0.679357	0.747809	2.08404	1.26917	0.241821	2.4758	0.75498		-0.389591	1.2895	1.67909	0.0014436
GCAGTCTACCTCTGAAAGATT	TRCN0000031201	Yme1l1	10.1745	10.2748	10.2546	10.3291	10.2417	10.2824	10.1836	10.2197	10.3292	10.2327	10.3654	10.4613	11.1185	11.4605	11.2671	11.1914	10.3485	10.1394	8.58749	7.47293	8.35531	8.61953	5.75153	9.53252		-0.944017	-1.18572	-1.01247	-0.862311	-0.106729	0.143057	1.59611	2.74677	1.97389	1.61318	4.61384	0.928825		-1.00113	1.68862	2.68975	0.00142827
CCTGAGAATGACAGATGGAAT	TRCN0000031202	Yme1l1	10.9775	10.9619	10.8903	10.8602	10.9025	11.003	11.0215	10.9755	10.9227	10.9711	10.7563	10.7297	10.6497	10.7762	9.90389	9.92304	8.35475	10.6837	8.43374	8.97849	10.6855	10.5527	8.2334	8.71162		0.327766	0.185684	0.986379	0.937146	2.54777	0.319256	2.58778	1.99698	0.237191	0.418403	2.52291	2.01806		0.609244	1.58105	0.971802	0.0476676
GCTTGGGTAATAGCAGCCATT	TRCN0000039399	Hdac1	8.81466	8.78754	8.90779	8.86472	8.88723	8.7557	8.79945	8.80165	8.88786	8.88417	8.99484	9.11511	9.227	9.17799	9.70531	9.50073	7.7135	9.16992	7.89081	8.65293	8.09249	9.76333	7.72644	8.81693		-0.412337	-0.390448	-0.79752	-0.636015	1.17372	-0.414216	0.908641	0.148715	0.795379	-0.879159	1.2684	0.298176		-0.55908	0.412458	0.971538	0.00891239
CCTTGCAGTCTCTCTGAAGTA	TRCN0000041513	Hadh	10.1328	10.1109	10.086	10.121	10.1109	10.1118	10.1425	10.0982	10.1363	10.1324	10.0793	10.0996	10.7583	10.9603	11.0605	10.6234	8.88005	9.8965	8.74273	8.18367	9.96492	10.6442	8.87749	9.97757		-0.625464	-0.849366	-0.974527	-0.502389	1.2309	0.21529	1.39978	1.91456	0.171345	-0.511717	1.20176	0.122017		-0.737936	0.717992	1.45593	0.00131585
CGTCTTCTTTGCAGATCACAA	TRCN0000041516	Hadh	7.65388	7.60031	7.65026	7.66193	7.72266	7.55095	7.51602	7.49794	7.5838	7.5337	7.7272	7.48655	5.64878	6.21806	3.93984	5.38187	1.92198	0.53983	3.20492	3.51982	3.86553	10.1064	0.308588	5.8681		2.0051	1.38225	3.71041	2.28006	5.80068	7.01112	4.3111	3.97812	3.71827	-2.57272	7.41861	1.61845		2.34446	3.91046	1.566	0.23914
GCCATTAGAAACGGTGCAGAA	TRCN0000041618	Ndufb3	10.1086	10.0663	10.1585	10.1075	10.0932	10.0706	10.0217	10.0867	10.1718	10.0754	10.2004	10.3464	9.9684	10.1604	9.55738	9.68328	10.827	9.1442	7.86623	8.41998	8.60656	9.54345	9.28444	9.11523		0.140158	-0.0941008	0.601095	0.424249	-0.733836	0.926367	2.15543	1.66677	1.56521	0.531905	0.915971	1.2312		0.26785	1.03238	0.764526	0.052871
CATCACCTTCCCGAGTGTAAT	TRCN0000041621	Ndufb3	9.83487	9.89581	9.87571	9.87455	9.81097	9.87966	9.86716	9.90513	9.91265	9.89014	9.78983	9.86466	9.48915	9.68511	8.44264	8.68941	7.8697	9.70373	6.16517	7.07083	10.5851	8.73395	7.88034	8.06074		0.345725	0.210699	1.43307	1.18514	1.94127	0.175928	3.70199	2.8343	-0.672434	1.15619	1.90949	1.80392		0.793661	1.60633	0.81267	0.190344
GAACTTCTTCAGGCAGATAAA	TRCN0000041840	Ndufa8	10.1562	10.1727	10.1637	10.2585	10.2676	10.085	10.0545	10.081	10.2453	10.1178	10.4207	10.5268	8.90156	8.49788	9.53792	7.92587	6.40311	8.81967	6.98285	7.7818	8.23551	7.94351	7.45834	10.816		1.25464	1.67487	0.625755	2.33265	3.86451	1.26531	3.0716	2.29917	2.00979	2.17431	2.96237	-0.289131		1.47198	2.16974	0.697763	0.252893
CCGTTATCATGGACACAGTAT	TRCN0000041923	Pdha2	9.92417	9.95507	9.93037	9.89322	9.82163	9.94829	9.92003	10.0293	9.90656	9.95646	9.84627	9.84152	9.54641	9.59096	8.54037	9.53889	9.61972	9.8779	7.88837	7.68974	8.17929	9.28879	8.41056	8.84082		0.37776	0.364107	1.39	0.354333	0.201914	0.0703953	2.03166	2.33952	1.72727	0.667663	1.4357	1.00069		0.62155	1.18435	0.562804	0.183633
CAGATCCACATCATAGACTTT	TRCN0000042491	Tssc1	12.1528	12.1589	12.1409	12.1944	12.1603	12.1565	12.1443	12.1294	12.167	12.1606	12.1769	12.2249	12.5517	12.33	12.33	12.5362	12.5361	13.2746	12.6213	12.5098	12.3167	13.0903	14.5832	13.2315		-0.398897	-0.171098	-0.189141	-0.341829	-0.375788	-1.11817	-0.476955	-0.380343	-0.149769	-0.929681	-2.40633	-1.00665		-0.275241	-0.85546	-0.580219	0.0573628
GCAGCAAGCATAATACCATTA	TRCN0000042519	Nf2	10.1565	10.2843	10.2005	10.2313	10.1035	10.2333	10.1506	10.2194	10.246	10.2317	10.2076	10.2808	11.368	11.3227	11.5542	11.0244	12.4515	12.6769	11.0128	11.0106	13.2861	14.0157	12.9505	12.6321		-1.2115	-1.03843	-1.3537	-0.793055	-2.34805	-2.44362	-0.862215	-0.791141	-3.04014	-3.78401	-2.74292	-2.35128		-1.09917	-2.29542	-1.19625	0.012992
CGCTATGAAGAAGTTTATCTT	TRCN0000042546	Rb1	10.9706	11.0349	10.9363	10.9302	10.9195	11.0525	10.9851	11.0197	10.945	10.9285	10.8562	10.93	13.5371	13.2372	13.4796	13.2529	15.6753	15.5612	15.3648	15.4967	15.4043	14.8002	13.8951	14.3288		-2.56653	-2.20229	-2.54335	-2.3227	-4.7558	-4.50866	-4.37968	-4.47697	-4.45932	-3.87171	-3.03892	-3.39877		-2.40872	-4.11123	-1.70251	4.74286e-05
CGACAAGGAAATAGTGAAATT	TRCN0000042598	Cdkn2b	10.8765	10.8963	10.8434	10.7818	10.7489	10.9009	10.9006	10.8953	10.786	10.861	10.7784	10.808	14.3487	14.7089	15.8384	15.8544	16.3324	16.3043	17.0303	17.6609	15.802	13.5771	17.3073	15.0922		-3.47215	-3.81257	-4.99493	-5.0726	-5.58343	-5.40339	-6.12964	-6.76564	-5.016	-2.71607	-6.52886	-4.28421		-4.33807	-5.3034	-0.965339	0.15323
CGAATAGGAGATCAAGAATTT	TRCN0000042603	Crk	10.8751	10.9612	10.8761	10.9338	10.8598	11.0066	10.9479	10.9875	10.9079	10.9656	10.738	10.7113	8.07209	8.95824	8.93737	9.01022	5.59126	7.16335	7.48064	6.99743	5.35428	8.07178	6.0433	5.29565		2.80301	2.00299	1.93869	1.92355	5.26858	3.84325	3.4673	3.99009	5.55367	2.89382	4.69468	5.41564		2.16706	4.39088	2.22382	0.000288254
GCTGGTAAAGGTTACGAAGAT	TRCN0000042604	Crk	10.1509	10.2343	10.1421	10.2059	10.1732	10.2095	10.188	10.1512	10.196	10.1749	10.1825	10.183	10.9293	12.4111	11.5637	12.0948	9.37502	9.05	9.54167	9.33613	6.8122	9.34064	6.17895	5.36853		-0.778363	-2.17682	-1.42155	-1.88882	0.798175	1.15953	0.64638	0.815108	3.38382	0.834269	4.00359	4.81444		-1.56639	2.05691	3.6233	0.000381888
GCTTAAGCAGAAAGTCATGAA	TRCN0000042695	Jun	10.1191	10.1818	10.1451	10.1688	10.1336	10.2032	10.1597	10.1546	10.169	10.1986	10.0745	10.2017	10.6006	10.472	10.6571	10.1294	8.54484	8.1808	10.6807	10.0532	9.54796	11.9343	10.5196	10.6385		-0.481424	-0.290198	-0.512022	0.0393719	1.58878	2.02244	-0.520962	0.101411	0.621038	-1.7357	-0.445056	-0.43682		-0.311068	0.149392	0.46046	0.337019
CCTCTCTCTTAAACTTGATAT	TRCN0000042724	Tsc2	10.6796	10.6766	10.6642	10.6136	10.6092	10.7543	10.7352	10.7286	10.683	10.7151	10.4909	10.4999	13.1636	13.7584	14.0241	14.4965	14.9677	15.2748	14.3753	14.7758	14.4869	15.0347	15.3254	15.6126		-2.48403	-3.08185	-3.3599	-3.88291	-4.3585	-4.52052	-3.64012	-4.04719	-3.80398	-4.31958	-4.83446	-5.11273		-3.20217	-4.32963	-1.12746	0.0194829
GCCATTGACGTAGATTCATTA	TRCN0000054411	Mtif2	9.9055	10.0634	9.97087	10.033	9.96792	10.0261	9.94677	9.95088	10.001	9.9593	10.0027	10.0098	9.60781	9.51959	10.0595	9.64077	7.19914	9.49693	8.3225	7.5934	8.52604	7.96929	6.97037	8.01153		0.297684	0.54376	-0.0886293	0.392228	2.76878	0.529156	1.62427	2.35748	1.47496	1.99001	3.03236	1.99826		0.286261	1.97191	1.68565	0.000347066
ACAAACACGTTTCTCCAAGAA	TRCN0000054496	Dap	10.3907	10.4335	10.4136	10.4172	10.4079	10.4924	10.4434	10.4455	10.4341	10.4738	10.3093	10.3174	10.0534	9.77811	11.7371	11.6469	7.01415	8.21508	8.49112	7.94998	7.34179	9.03242	7.49594	11.1412		0.337284	0.655379	-1.3235	-1.2297	3.39376	2.27734	1.95226	2.49549	3.09232	1.44135	2.81334	-0.823831		-0.390133	2.08025	2.47039	0.00803245
GTGTTCATCTCTGGCGTTATT	TRCN0000054497	Dap	9.84569	9.836	9.85046	9.93181	9.93685	9.76468	9.70552	9.77009	9.89347	9.82132	9.9934	10.1471	9.96696	9.81165	8.99913	9.2349	6.96394	7.78586	8.58825	8.30179	8.85018	9.10275	9.46277	10.2211		-0.121268	0.0243561	0.851325	0.696907	2.97291	1.97882	1.11728	1.46831	1.04329	0.71857	0.530631	-0.0740262		0.36283	1.21947	0.856643	0.0635041
GATGGAGTTCATCGACAACAA	TRCN0000054593	Srf	9.98355	10.0124	10.037	10.006	10.0932	10.0278	9.96241	10.0249	10.048	10.0448	10.0495	10.2263	9.73523	8.90935	8.70203	8.16543	6.00944	6.19518	7.75416	6.20729	11.0638	7.20791	5.47851	7.5565		0.24832	1.10307	1.33496	1.8406	4.08375	3.8326	2.20825	3.81763	-1.01576	2.83684	4.57096	2.66977		1.13174	2.87551	1.74377	0.0338619
GCCATGTGTATACCTTTGCCA	TRCN0000054597	Srf	9.84667	9.8459	9.88204	9.90006	9.9031	9.85042	9.77342	9.85036	9.92393	9.84781	9.96471	10.0797	9.51114	9.35298	8.79851	9.12899	8.85272	7.97112	7.8311	8.91054	8.79474	7.91308	7.9343	8.50328		0.335532	0.492916	1.08354	0.771074	1.05038	1.8793	1.94232	0.939823	1.12919	1.93473	2.03042	1.57641		0.670764	1.56032	0.889558	0.00447169
GCCAGAATCCATCCATTCATT	TRCN0000054979	Mtor	9.81966	9.84935	9.8049	9.88473	9.79652	9.81979	9.78193	9.82141	9.81941	9.86577	9.86643	9.91957	5.10926	3.02824	3.58291	2.34845	1.75205	0.802865	2.00328	1.09355	3.30365	3.39371	-0.691412	1.02512		4.71039	6.82111	6.22199	7.53628	8.04446	9.01693	7.77865	8.72785	6.51576	6.47206	10.5578	8.89445		6.32244	8.251	1.92856	0.041294
GCTTGATCTTAGGGATGATAA	TRCN0000055188	Rac1	10.068	10.1373	10.0829	10.1227	10.0932	10.1627	10.1046	10.0861	10.0904	10.1013	10.0425	10.0515	8.04165	8.56157	8.80462	8.24326	5.57223	7.55552	4.65864	7.62493	6.19674	6.58835	4.23933	7.55494		2.02634	1.57576	1.27829	1.87947	4.52096	2.6072	5.44601	2.46117	3.89364	3.51297	5.80322	2.49654		1.68997	3.84272	2.15275	0.00211174
CTCATCAGTTACACGACCAAT	TRCN0000055190	Rac1	10.688	10.7416	10.6689	10.6667	10.6651	10.7785	10.7122	10.7036	10.6665	10.686	10.5346	10.5312	9.25948	9.13284	9.1256	9.00129	7.1052	7.75123	8.8003	7.79399	8.73629	9.11981	8.07843	7.67617		1.42849	1.6088	1.54329	1.66536	3.5599	3.02723	1.91192	2.90959	1.93023	1.56619	2.45613	2.855		1.56149	2.52703	0.965539	0.0048081
CTACGCCAACCTCAGCAACTT	TRCN0000055205	Jun	10.0012	9.90341	9.96126	9.99592	10.0806	9.8935	9.88794	9.94947	9.97136	9.93383	10.1124	10.1468	9.373	9.40599	10.1439	9.87054	7.03977	8.45032	7.37832	8.02133	12.0733	13.0032	10.0365	12.4163		0.628249	0.497418	-0.182683	0.125388	3.0408	1.44318	2.50961	1.92814	-2.10198	-3.06934	0.0759095	-2.26941		0.267093	0.194613	-0.0724796	0.9354
GCTAGTGATTGATCCAGACAA	TRCN0000055276	Mapk9	9.26887	9.38511	9.30338	9.3492	9.30328	9.34257	9.29735	9.33282	9.3473	9.30898	9.34297	9.30854	8.6837	8.03667	8.62577	7.93903	5.77442	6.95937	7.16718	7.50294	7.20135	8.01038	6.46846	7.90041		0.585163	1.34844	0.677615	1.41017	3.52886	2.3832	2.13017	1.82988	2.14594	1.2986	2.87451	1.40813		1.00535	2.19991	1.19456	0.00608791
CAGACCAAAGTACCCTGGAAT	TRCN0000055277	Mapk9	9.96322	9.8611	9.9102	9.83059	9.94608	9.82683	9.86686	9.88612	9.96498	9.92287	10.0567	10.2044	9.47335	8.71911	7.90484	8.02264	4.85009	7.0058	8.82538	7.57938	7.45437	8.82146	7.88602	9.4635		0.489876	1.14199	2.00536	1.80795	5.09599	2.82103	1.04148	2.30674	2.51061	1.10141	2.1707	0.740949		1.3613	2.22361	0.862318	0.181614
GCGATTCACAACCCAAATTTA	TRCN0000055286	Klf5	9.75297	9.80995	9.77572	9.90046	9.8747	9.7359	9.61864	9.67661	9.80252	9.75015	9.9268	9.97272	8.91961	9.17481	8.87672	9.13472	4.97122	2.30537	7.05204	7.15695	9.53064	8.02856	7.44045	6.95112		0.833359	0.635146	0.898996	0.765745	4.90347	7.43054	2.5666	2.51966	0.271888	1.72159	2.48636	3.02161		0.783311	3.11521	2.3319	0.0187664
GCAGTAATGGACACCCTTAAT	TRCN0000055287	Klf5	10.0308	10.1321	10.0887	10.1086	10.0268	10.0944	10.1614	10.1099	10.1478	10.1533	10.1071	10.1887	10.0323	10.5373	10.0784	10.0191	6.12274	7.7395	7.74879	7.66341	10.1667	11.0307	10.5076	9.78201		-0.00143668	-0.405188	0.0102891	0.0894665	3.90405	2.3549	2.41266	2.44652	-0.0188515	-0.877368	-0.400537	0.406703		-0.0767173	1.27851	1.35523	0.0616634
CCCGAAGTCTACTCCATCATT	TRCN0000066104	Tnfrsf1a	10.3817	10.3821	10.3523	10.3291	10.3298	10.4193	10.3227	10.3593	10.3379	10.3466	10.3257	10.3378	10.7054	10.6795	10.8484	11.0229	9.51236	9.12404	8.5935	8.44007	9.4534	10.1274	10.3824	9.88652		-0.323649	-0.297462	-0.496035	-0.693784	0.817427	1.29527	1.72921	1.91924	0.88447	0.219257	-0.056743	0.451261		-0.452733	0.907423	1.36016	0.000702341
CCTCGTGCTTTCCAAGATGAA	TRCN0000066106	Tnfrsf1a	9.66429	9.6593	9.68044	9.54566	9.64516	9.61647	9.66999	9.588	9.64624	9.56141	9.55955	9.52192	9.19277	7.84202	8.1348	7.95578	1.83952	7.29739	6.06506	5.35094	5.37894	8.74027	3.98101	5.84274		0.471514	1.81728	1.54564	1.58989	7.80565	2.31909	3.60493	4.23706	4.2673	0.82114	5.57853	3.67918		1.35608	4.03911	2.68303	0.00822474
CGAGAAATGTAACACGGTCAA	TRCN0000066558	Psme3	9.60031	9.51977	9.56406	9.49767	9.63276	9.47037	9.49068	9.53079	9.50395	9.53836	9.44168	9.5461	9.16631	9.59286	8.90737	8.07807	8.86384	8.8859	8.24931	8.88064	9.55564	10.1642	6.81638	6.61608		0.433998	-0.0730923	0.656691	1.41961	0.768916	0.584473	1.24137	0.650148	-0.051691	-0.625882	2.6253	2.93002		0.609301	1.01533	0.40603	0.463942
CGCACTGTCACAGAGATTGAT	TRCN0000066560	Psme3	6.99625	6.95324	7.03447	7.13268	7.15451	6.97914	6.93419	7.03658	7.00645	6.97061	7.10278	7.08685	2.9684	3.86113	0.557375	3.51837	2.79645	7.5194	1.85128	-1.90645	5.90002	3.22378	0.308588	6.03411		4.02785	3.09211	6.47709	3.61431	4.35806	-0.540254	5.08291	8.94303	1.10643	3.74683	6.7942	1.05274		4.30284	3.81799	-0.484845	0.727492
CTTCTCCGTTCCAAGATCCTT	TRCN0000067120	Il23a	10.1638	10.243	10.1809	10.1415	10.1942	10.1811	10.2066	10.1779	10.1965	10.1738	10.1847	10.1499	10.061	9.8372	10.1174	10.5731	7.88776	8.91921	8.14488	8.87901	9.37128	8.79667	5.78432	8.32524		0.1028	0.405747	0.0634654	-0.43152	2.30646	1.26194	2.06177	1.29893	0.825195	1.37716	4.40042	1.82467		0.035123	1.91957	1.88444	0.0016685
GCCCTTAGTGCCAACAGCTTA	TRCN0000067122	Il23a	3.51787	3.28538	3.7351	3.61185	3.4656	3.39979	3.6721	3.40855	3.66996	3.47311	3.34523	3.9615	5.20656	3.4545	2.20945	2.1558	0	3.53983	0.266318	0	0	-0.0981473	0	1.61008		-1.68869	-0.169124	1.52565	1.45604	3.4656	-0.140045	3.40578	3.40855	3.66996	3.57126	3.34523	2.35142		0.28097	2.88472	2.60375	0.0310924
CCCACATCACTGGCAAACATT	TRCN0000067229	Ghr	10.3945	10.4077	10.4271	10.3603	10.361	10.4793	10.4249	10.4162	10.4116	10.4585	10.2774	10.2298	9.54137	9.64938	8.96434	8.9183	8.06494	7.97613	7.15911	8.31635	7.97608	8.87052	8.14306	8.22577		0.85313	0.75829	1.46281	1.44203	2.29611	2.50321	3.26579	2.09986	2.43555	1.58793	2.13438	2.00407		1.12906	2.29086	1.1618	0.00196879
GCTTTAACCAAGAGGACATTT	TRCN0000067232	Ghr	10.2163	10.2567	10.2382	10.232	10.2239	10.2793	10.2233	10.3358	10.2976	10.2668	10.2742	10.352	8.64083	8.87059	8.13048	7.75571	5.16145	9.19876	6.30706	6.85842	8.48403	9.02468	7.04668	6.4071		1.57546	1.38615	2.10776	2.47627	5.06249	1.08054	3.91626	3.47736	1.81359	1.24208	3.22751	3.94488		1.88641	2.97059	1.08418	0.0857998
GTCATCCAATAAGAACATCTA	TRCN0000067575	Cd55	10.3002	10.4067	10.3177	10.3841	10.3026	10.4055	10.3702	10.3884	10.3389	10.3781	10.3168	10.292	10.0561	9.71386	10.426	9.8438	8.45163	9.18945	7.78988	9.35447	9.49817	10.4586	10.3901	9.91751		0.244047	0.692799	-0.108248	0.540251	1.851	1.21609	2.58027	1.03395	0.840722	-0.0804805	-0.0733013	0.374477		0.342212	0.967843	0.625631	0.124238
GTCACAGGAAATACTGTTGAT	TRCN0000067577	Cd55	9.7568	9.78342	9.81376	9.81152	9.75641	9.82761	9.82755	9.82218	9.82558	9.77868	9.74525	9.84006	9.68897	8.85638	8.85068	8.82215	7.34824	6.81036	10.7723	8.40644	7.3058	8.47266	8.46214	8.45724		0.0678211	0.927049	0.963075	0.989366	2.40817	3.01725	-0.944744	1.41574	2.51979	1.30603	1.28311	1.38282		0.736828	1.54852	0.811692	0.124326
GTAGACAGTTTCCACTTCCTT	TRCN0000067693	Inha	11.3019	11.2584	11.3992	11.3291	11.2837	11.2946	11.3318	11.3312	11.4095	11.3891	11.4596	11.6628	12.1283	11.7496	11.7313	11.3916	10.7259	11.1356	11.0038	11.0025	11.3933	11.936	11.8578	11.3888		-0.826422	-0.491146	-0.332109	-0.0625696	0.557754	0.158956	0.327915	0.328691	0.016212	-0.546912	-0.398151	0.273946		-0.428062	0.0898014	0.517863	0.0412319
GCCCTGCTCTTCTCCACGCTA	TRCN0000067794	Csf2ra	8.91455	8.86937	8.9876	8.99292	9.03912	8.74088	8.77211	8.80632	8.98718	8.86543	9.26826	9.43916	9.26937	8.51809	8.0742	8.29973	5.43153	9.72123	6.47902	6.58541	8.87856	9.11617	8.71479	9.48291		-0.354817	0.351286	0.913402	0.693187	3.60758	-0.980354	2.29309	2.22091	0.108616	-0.25074	0.553464	-0.0437517		0.400764	0.938602	0.537838	0.409889
GCGCTCCTGTATGCAGTGACA	TRCN0000067797	Csf2ra	8.69289	8.6189	8.6933	8.73664	8.87674	8.37653	8.21223	8.41672	8.72446	8.53116	9.26647	9.58808	10.147	9.62629	9.41224	9.83025	8.21046	9.55886	9.05585	7.92169	9.14795	9.00448	7.47601	12.3176		-1.45415	-1.0074	-0.71894	-1.0936	0.666284	-1.18233	-0.843623	0.495032	-0.42349	-0.473326	1.79047	-2.72954		-1.06852	-0.337566	0.730956	0.183911
GCCACTTCTGAGCATGAACTA	TRCN0000068000	Cd274	9.62297	9.71543	9.6933	9.79564	9.73593	9.68131	9.5958	9.60956	9.68782	9.69702	9.75334	9.85198	8.86725	8.79228	8.06856	8.66133	4.94188	5.97279	6.47902	6.7338	7.24225	7.71242	6.40135	8.89363		0.755714	0.923147	1.62474	1.13431	4.79406	3.70852	3.11678	2.87576	2.44557	1.9846	3.352	0.958345		1.10948	2.90445	1.79497	0.00291533
GTTTACTATCACGGCTCCAAA	TRCN0000068002	Cd274	10.2039	10.2271	10.2622	10.183	10.2397	10.2546	10.2355	10.2156	10.2694	10.2088	10.2718	10.2601	10.9772	11.0019	11.5332	11.5074	12.0081	9.96651	10.5747	10.7613	10.5008	11.9464	9.74322	10.5303		-0.773328	-0.774799	-1.27105	-1.32435	-1.76841	0.288067	-0.339122	-0.54572	-0.231309	-1.73766	0.528603	-0.270285		-1.03588	-0.50948	0.526402	0.147705
GCCACTTCTTTCTGGCTTCAT	TRCN0000068439	Slc20a2	8.92386	8.93666	8.94119	8.90687	8.93965	8.87212	8.82438	8.83634	8.95697	8.89014	9.04567	9.1926	8.77642	8.66758	8.3378	8.01733	8.11071	7.91834	10.6633	8.88878	7.58199	9.40568	8.57068	10.5499		0.147446	0.269084	0.603391	0.889534	0.828949	0.95378	-1.83889	-0.0524444	1.37498	-0.515539	0.474983	-1.35725		0.477364	-0.0164299	-0.493794	0.289553
GAGTTACACAAGAAGCTGCTA	TRCN0000068442	Slc20a2	9.73228	9.65142	9.73549	9.69145	9.81829	9.65651	9.57937	9.67107	9.7323	9.64068	9.93132	10.0618	8.9226	8.63557	9.05608	8.8433	4.22779	5.97279	6.14896	5.87491	6.10609	6.45644	8.00382	8.9284		0.80968	1.01585	0.679407	0.848144	5.5905	3.68373	3.43041	3.79616	3.62621	3.18424	1.9275	1.13339		0.838271	3.29652	2.45824	0.00112691
CCTTTGGCTACCTACAGACAA	TRCN0000070130	Slc22a18	8.02768	7.97504	8.12029	8.09811	8.0578	7.96078	7.97474	7.98116	8.09087	8.09875	8.12527	8.12089	7.91062	8.25826	8.91807	8.14773	5.00944	7.38532	6.7977	5.83502	6.38301	6.87052	8.81341	6.76389		0.117066	-0.28322	-0.797772	-0.0496157	3.04836	0.575464	1.17704	2.14614	1.70786	1.22823	-0.688133	1.357		-0.253385	1.31899	1.57238	0.00512814
GCAGTTCTCCATCCTACCATA	TRCN0000070131	Slc22a18	-2.26349	0	-2.12288	-0.911717	-1.39238	-0.441517	-2.3279	-2.05088	-2.43856	0	0.345227	-0.845857	0	0	0	0	0	0	0	0	0	0	0	0		-2.26349	0	-2.12288	-0.911717	-1.39238	-0.441517	-2.3279	-2.05088	-2.43856	0	0.345227	-0.845857		-1.32452	-1.14398	0.180537	0.792406
GCTATGCCAATACTGGTTATA	TRCN0000070228	Bet1	6.89386	6.9199	6.97515	6.96173	6.79991	6.94219	7.11089	6.9378	6.94514	7.06043	7.04844	6.68812	5.643	4.72868	5.16787	4.65223	-2.24795	1.2179	3.17321	3.48587	3.40319	5.10153	4.00903	5.71442		1.25086	2.19122	1.80728	2.3095	9.04786	5.72428	3.93768	3.45193	3.54195	1.95891	3.03941	0.973702		1.88971	3.95947	2.06975	0.0526732
GCTGAAATGGATTCACAATTT	TRCN0000070230	Bet1	10.747	10.759	10.7334	10.7405	10.7314	10.8284	10.7826	10.7891	10.7593	10.7949	10.6928	10.7267	8.43705	8.47636	7.69839	8.79139	8.62319	7.45392	6.91976	6.69347	7.43685	8.63317	5.4885	7.43111		2.30999	2.28266	3.03496	1.94907	2.10823	3.37447	3.86282	4.09564	3.32241	2.16169	5.20435	3.29557		2.39417	3.42815	1.03398	0.0351691
GCAGTCAGCATGTAAGCAGAA	TRCN0000070998	Top3a	10.3054	10.3848	10.371	10.4367	10.4152	10.3445	10.2625	10.3152	10.4604	10.3826	10.5172	10.5818	9.70433	9.97843	8.99081	8.44911	6.44205	6.47529	8.30157	7.48372	6.95573	9.08611	10.7828	8.71092		0.60109	0.40634	1.38016	1.98763	3.97312	3.86919	1.96088	2.83144	3.50469	1.29649	-0.265647	1.87088		1.09381	2.38013	1.28633	0.0688928
GCCAGAATGTTACTATGATAA	TRCN0000070999	Top3a	10.6245	10.6926	10.5817	10.6236	10.5616	10.7497	10.6761	10.7138	10.6243	10.6127	10.4781	10.3808	9.22941	9.95861	9.32319	8.77366	6.54322	7.08518	7.07367	7.01837	11.2039	9.61309	9.78077	11.1163		1.39508	0.733972	1.25848	1.8499	4.01842	3.66457	3.60247	3.69541	-0.579618	0.999576	0.697341	-0.735535		1.30936	1.92033	0.610972	0.441696
GCAGGTACACAGCCTTCTAAA	TRCN0000071415	Acp6	6.97492	7.10926	7.06447	7.12446	6.91823	6.8894	7.10255	7.10899	7.11026	7.08146	7.11341	7.13523	5.77576	4.88622	4.70422	6.06269	4.98087	3.97279	2.68136	0.900908	3.40319	4.86764	1.76802	9.05358		1.19916	2.22304	2.36026	1.06177	1.93736	2.91661	4.4212	6.20808	3.70707	2.21382	5.34539	-1.91834		1.71105	3.1039	1.39284	0.17767
CCCAACTTACAGAACCAGCAA	TRCN0000071604	Sp1	6.508	6.33681	6.38491	6.28796	6.5734	6.45734	6.45673	6.46087	6.4163	6.56887	6.32251	6.24866	3.54098	6.17799	4.7158	5.02087	0	1.2179	0.681355	3.76598	6.55158	8.44585	1.30859	7.71302		2.96702	0.158822	1.66911	1.26708	6.5734	5.23943	5.77538	2.69489	-0.135275	-1.87698	5.01392	-1.46436		1.51551	2.72755	1.21204	0.390212
CCTTCACAACTCAAGCTATTT	TRCN0000071606	Sp1	8.81932	8.81701	8.80045	8.78177	8.75291	8.7937	8.86686	8.7685	8.73199	8.77223	8.72634	8.49696	6.29402	6.43763	5.84805	6.29681	1.33702	3.34719	3.00328	3.13795	1.37077	3.11131	3.30859	2.70319		2.5253	2.37938	2.95239	2.48496	7.4159	5.44651	5.86357	5.63055	7.36122	5.66093	5.41775	5.79377		2.58551	6.07377	3.48827	1.48273e-06
GCTACCTAAGTTCCGCGAGGT	TRCN0000071779	Wnt7b	8.25418	8.07602	8.24125	8.14898	8.32272	8.07812	8.06763	8.15979	8.29445	8.25293	8.52115	8.92453	9.16379	9.20441	9.76996	9.45958	6.4663	8.38657	9.56667	9.71102	9.15867	8.14503	11.0127	9.94219		-0.90961	-1.12839	-1.5287	-1.3106	1.85642	-0.308455	-1.49904	-1.55123	-0.864217	0.107903	-2.49156	-1.01766		-1.21933	-0.720979	0.498348	0.331222
GCAGCTACGCAGCTACCAGAA	TRCN0000071781	Wnt7b	9.45419	9.36667	9.46537	9.54464	9.53169	9.42628	9.36733	9.38374	9.56671	9.47002	9.71199	9.87951	8.85605	9.44715	8.24887	8.40373	5.75768	5.71775	8.29882	7.88959	7.48119	7.87052	6.15408	9.04026		0.598135	-0.0804756	1.2165	1.14091	3.77401	3.70853	1.06851	1.49415	2.08552	1.5995	3.55791	0.839253		0.718766	2.26592	1.54716	0.0150506
GCAGATATGTAACTGGTTCAT	TRCN0000075524	Tgif2	10.7023	10.7501	10.7723	10.7547	10.7017	10.819	10.7434	10.7983	10.7759	10.8051	10.7531	10.7756	9.26937	9.79725	9.74614	9.706	9.34918	7.62729	8.29882	8.31272	9.7094	9.14622	9.78077	11.2581		1.43292	0.95284	1.02618	1.04873	1.35252	3.19172	2.44457	2.4856	1.06651	1.65887	0.972361	-0.482556		1.11517	1.5862	0.471031	0.292163
GCTCTCAGAATCCTGGGTATT	TRCN0000075715	Lss	9.08358	9.13451	9.20355	9.14221	9.07165	9.06165	9.04877	9.0995	9.18211	9.09244	9.25812	9.44185	9.0038	8.46703	9.05266	9.18922	7.27758	7.11272	7.31253	7.42671	8.23213	8.07678	6.0433	9.76321		0.0797781	0.667477	0.15089	-0.0470148	1.79408	1.94893	1.73624	1.67279	0.949979	1.01566	3.21482	-0.321357		0.212783	1.50139	1.28861	0.00903668
GCACTGAAGCATTTCCATGAA	TRCN0000075717	Lss	10.173	10.1934	10.212	10.2604	10.172	10.2421	10.1724	10.1911	10.28	10.2298	10.2742	10.3186	8.3869	7.58666	8.34714	7.92209	6.02818	6.70976	6.54244	6.60531	7.8122	7.78755	6.34751	6.86306		1.78606	2.60677	1.86481	2.33831	4.14383	3.53231	3.63	3.58579	2.46777	2.44228	3.92668	3.45557		2.14899	3.39803	1.24904	0.00209667
GCAAGTTTATGTGACCTTAAA	TRCN0000076045	Hmgcs1	7.92386	7.94957	8.0064	7.96787	7.9114	7.94937	7.94356	7.95474	7.98034	7.99913	8.04705	7.88772	6.03615	7.07263	5.23384	3.25534	6.6975	0.217902	2.38179	3.41548	6.15926	7.24393	4.45834	6.99321		1.88772	0.876936	2.77257	4.71253	1.2139	7.73147	5.56177	4.53926	1.82108	0.755207	3.58872	0.894512		2.56244	3.26324	0.700802	0.577417
CCTTCACAAATGACCACAGTT	TRCN0000076047	Hmgcs1	8.08524	8.02118	8.12148	7.96787	8.02019	8.04632	8.12845	8.0044	7.9473	8.06865	7.88128	7.90792	6.51272	6.93813	5.91493	7.46479	2.45249	7.37019	4.98514	2.34148	6.41516	6.88769	1.47851	5.06951		1.57252	1.08305	2.20656	0.503077	5.56769	0.676136	3.14332	5.66292	1.53214	1.18095	6.40277	2.8384		1.3413	3.37554	2.03424	0.043301
CCCTTTGACCAGATGACCATT	TRCN0000076103	Atp5h	8.0033	7.9894	8.09387	7.92117	8.04433	7.95936	7.93067	7.91634	8.12368	8.05572	8.0512	8.21933	7.66599	7.16523	6.46427	6.94836	-0.247946	3.5033	4.20492	2.55298	6.30365	5.92976	2.30859	3.02512		0.337304	0.824165	1.6296	0.972814	8.29228	4.45606	3.72575	5.36336	1.82003	2.12596	5.74262	5.19421		0.940971	4.59003	3.64906	0.00135539
CCAGATGACCATTGATGACTT	TRCN0000076104	Atp5h	10.303	10.3312	10.3	10.2756	10.2161	10.3741	10.3148	10.3168	10.3163	10.3147	10.1829	10.2879	8.97532	9.4011	8.68076	8.22343	6.76048	6.81782	5.22051	3.79399	8.87278	8.49524	5.69229	6.10833		1.32772	0.93008	1.61922	2.05221	3.45562	3.55632	5.09431	6.52281	1.44354	1.81942	4.49056	4.17959		1.48231	3.82027	2.33797	0.00509856
CCCACTTCTATGACTTCATAA	TRCN0000076188	Atpaf1	11.197	11.2056	11.1749	11.149	11.1402	11.3001	11.2324	11.1996	11.1955	11.2534	11.0571	10.9852	10.4964	10.3808	10.819	9.85326	8.85993	7.29204	8.1581	8.51141	9.55564	9.87016	8.56598	10.2167		0.700587	0.824755	0.355929	1.29571	2.28029	4.00805	3.07433	2.68816	1.63981	1.38329	2.49109	0.768513		0.794246	2.29169	1.49744	0.0046894
GCTCCACTTCACTGCACTTAT	TRCN0000076189	Atpaf1	10.5269	10.6192	10.5309	10.6395	10.5993	10.5711	10.4917	10.5871	10.6491	10.5547	10.7126	10.7656	9.59439	9.47842	9.29836	9.21341	7.93693	8.07121	8.52763	8.372	10.2114	10.193	9.32679	9.72452		0.932468	1.14077	1.2325	1.4261	2.66239	2.4999	1.96405	2.2151	0.437664	0.361718	1.38585	1.04111		1.18296	1.57097	0.388012	0.278553
GCTGAATGAACCACTATCTAA	TRCN0000076391	Ywhah	10.1717	10.273	10.2799	10.2941	10.2878	10.2957	10.3184	10.2611	10.2125	10.2343	10.215	10.1367	9.98392	9.51507	10.7232	9.85227	9.12056	8.50215	7.21468	8.25216	12.0136	11.0287	8.08173	9.88497		0.187736	0.757891	-0.443314	0.441805	1.1672	1.79358	3.10375	2.00899	-1.80115	-0.794444	2.13325	0.251696		0.236029	0.982858	0.746828	0.269856
GCCAAACAAGCCTTCGATGAT	TRCN0000076392	Ywhah	10.1649	10.1187	10.2145	10.2459	10.3156	10.1009	9.97731	10.1178	10.1894	10.087	10.2346	10.3134	9.32279	9.15107	9.91712	9.39625	7.82083	7.93558	7.98969	9.4036	9.41218	8.7575	8.74217	9.85991		0.842078	0.967611	0.297338	0.849694	2.49479	2.16529	1.98761	0.71419	0.777249	1.32946	1.49241	0.453476		0.739181	1.42681	0.687629	0.0471751
GCGGTGATGGAATGAACAGTA	TRCN0000076411	Plod2	8.91953	8.92271	8.97975	8.96787	9.07471	8.86454	8.83071	8.82333	8.97665	8.92287	9.13313	9.35667	11.227	9.75488	9.62308	9.89438	9.12438	7.97613	7.69956	8.30301	6.99348	8.59272	7.93612	8.08149		-2.30747	-0.832177	-0.643328	-0.926509	-0.0496612	0.888419	1.13115	0.520323	1.98317	0.330146	1.19701	1.27519		-1.17737	0.909468	2.08684	0.00481232
GCCCATAATTGATGCCTGCAA	TRCN0000076569	Aox1	9.69687	9.61659	9.74247	9.66995	9.76654	9.56504	9.46936	9.59747	9.7045	9.59144	9.86093	10.0386	9.922	9.97952	9.48007	9.59043	9.43197	8.64731	10.2152	10.0239	8.59257	9.06235	7.626	9.25105		-0.225127	-0.362938	0.262401	0.0795255	0.334569	0.917734	-0.745815	-0.426447	1.11193	0.52909	2.23493	0.787517		-0.0615346	0.592938	0.654472	0.0996188
GCTGTTTGGATCAAGAAATAA	TRCN0000076572	Aox1	10.3304	10.4663	10.3948	10.4434	10.3715	10.4386	10.3751	10.416	10.4106	10.4316	10.3528	10.3033	8.91062	9.19691	9.11306	10.2718	7.30088	8.43344	6.86871	8.78268	7.50192	8.12706	5.87844	8.50247		1.41975	1.26934	1.28173	0.171586	3.07058	2.00514	3.50643	1.63328	2.90872	2.30458	4.47437	1.80078		1.0356	2.71299	1.67738	0.00431136
GCCAGAATACTACTACATTCA	TRCN0000076587	Nox4	10.7945	10.8417	10.7691	10.8038	10.7631	10.8125	10.8548	10.838	10.7762	10.8054	10.7354	10.6139	11.3223	11.5685	10.3296	10.0314	7.17412	7.80474	11.2155	9.25342	9.11346	9.71684	9.62995	10.2382		-0.527838	-0.726788	0.439521	0.772376	3.58895	3.00779	-0.360732	1.58463	1.66275	1.0886	1.10544	0.375692		-0.0106821	1.50664	1.51732	0.0275494
GCTGCCTACATCCATGTAATA	TRCN0000076818	Pld1	6.67609	6.67991	6.70684	6.74292	6.61605	6.69803	6.64364	6.52654	6.65683	6.60482	6.909	6.8004	5.58989	6.98534	6.23384	6.32573	3.45249	4.40773	2.14079	3.41548	7.464	11.7285	6.16034	7.82861		1.0862	-0.305429	0.473006	0.417193	3.16355	2.29031	4.50286	3.11106	-0.807171	-5.12368	0.748658	-1.0282		0.417743	0.857173	0.43943	0.709352
GCTGTCTTTGTCTACATAGAA	TRCN0000076911	Plcb1	10.2992	10.3459	10.2923	10.3812	10.2895	10.3966	10.3096	10.2973	10.3508	10.3651	10.3626	10.3685	11.4943	11.7442	11.7492	12.2902	9.12764	8.2786	9.94521	8.90091	8.99215	9.42394	10.0258	9.53924		-1.19504	-1.3983	-1.45689	-1.90905	1.16188	2.11804	0.364419	1.39638	1.35861	0.941133	0.336756	0.82922		-1.48982	1.06331	2.55313	1.77237e-06
CGCATGATAACTGTGGTGTAT	TRCN0000076912	Plcb1	10.6862	10.6562	10.6405	10.6791	10.6836	10.6493	10.5906	10.643	10.5974	10.5868	10.6071	10.648	10.6464	10.718	11.4489	11.0812	10.3457	10.6153	10.4222	10.2703	9.50379	10.1513	9.14306	8.81758		0.0397174	-0.0618106	-0.808402	-0.402145	0.33792	0.0339475	0.168401	0.372689	1.09365	0.435492	1.46403	1.83041		-0.30816	0.717067	1.02523	0.00731619
GCGGTTTCTGAGCATTGATTT	TRCN0000077594	Rasgrf2	7.20615	7.12235	7.13215	7.33384	7.33213	6.99866	6.93184	6.9378	7.1464	6.99545	7.63063	7.63661	7.09451	7.97075	6.37573	5.07637	5.6347	4.59294	5.92453	5.2331	6.8302	6.89054	8.51804	6.43451		0.111642	-0.848407	0.756419	2.25747	1.69743	2.40572	1.00731	1.7047	0.316201	0.104908	-0.887413	1.2021		0.569281	0.94387	0.37459	0.639087
GCCTCCCAGATAATGAATTAT	TRCN0000077597	Rasgrf2	9.655	9.70514	9.68528	9.62404	9.65372	9.67786	9.67245	9.69185	9.65518	9.69247	9.74055	9.86121	9.81839	9.58331	9.79987	9.82772	8.27169	9.19876	9.21127	8.29935	8.60046	11.9717	7.08008	8.25009		-0.163387	0.121829	-0.114589	-0.203676	1.38203	0.479101	0.461178	1.3925	1.05472	-2.27925	2.66047	1.61113		-0.089956	0.845235	0.935191	0.110616
CATGGAGGATAGTGAATGATA	TRCN0000077830	Ccnc	10.8709	10.9413	10.8812	10.8219	10.7957	10.9554	10.973	10.9294	10.8605	10.9308	10.7641	10.7007	15.6267	15.7923	15.742	16.2433	16.3201	15.7579	16.0316	16.1504	13.6253	14.5388	13.2253	12.606		-4.75579	-4.85106	-4.86088	-5.42134	-5.52435	-4.8025	-5.05855	-5.22095	-2.76484	-3.60801	-2.46117	-1.90528		-4.97227	-3.91821	1.05406	0.077237
GCCATATAGATGTATGTACTA	TRCN0000078858	Fgfrl1	10.5798	10.6887	10.6525	10.6378	10.5477	10.7512	10.6959	10.7693	10.6123	10.7081	10.5422	10.595	8.85104	9.06097	9.55536	10.1121	9.15666	10.5962	7.28683	7.25342	9.33812	9.53802	7.45579	9.08959		1.7288	1.62776	1.09716	0.525754	1.39108	0.15499	3.40902	3.51587	1.27418	1.17012	3.0864	1.50542		1.24487	1.93839	0.693517	0.209362
GCCAGACATCATGTGGATGAA	TRCN0000078861	Fgfrl1	10.4109	10.4374	10.4102	10.4668	10.4395	10.4872	10.3667	10.3691	10.4632	10.3838	10.4973	10.5827	10.4109	10.0784	10.3352	10.7731	8.88327	8.96105	9.41098	9.12766	9.82385	12.3565	12.1846	9.22822		3.51949e-06	0.358992	0.0749885	-0.306288	1.55625	1.52619	0.9557	1.24141	0.639396	-1.97277	-1.68737	1.35445		0.0319239	0.451659	0.419735	0.449597
CCGCAGATTGAGCCTACAAAT	TRCN0000078873	Tpr	7.47629	7.28829	7.53533	7.45242	7.42939	7.34856	7.2132	7.37748	7.35748	7.28853	7.33391	7.45792	6.58387	7.20067	6.7013	6.51335	7.54159	6.51711	5.55787	5.42447	6.06108	6.255	4.23933	5.41744		0.892425	0.0876192	0.834026	0.939065	-0.112196	0.83145	1.65532	1.95301	1.29639	1.03353	3.09459	2.04049		0.688284	1.47407	0.785789	0.0734364
GCTGACTAATCTACAGACAAT	TRCN0000078877	Tpr	6.82927	7.0557	6.8167	6.8162	6.91596	6.91896	6.95287	6.97426	6.79025	6.87483	6.87505	6.83597	6.56258	6.02259	6.72156	7.60347	1.65894	3.64417	7.2455	4.66341	3.37077	1.70921	3.51804	1.02512		0.266685	1.03311	0.0951351	-0.787271	5.25701	3.2748	-0.292634	2.31085	3.41949	5.16562	3.35701	5.81085		0.151914	3.53787	3.38596	0.00168715
GCCCTTTGGATGATGTGTTAA	TRCN0000079268	Slc12a9	9.8574	9.94957	9.89393	9.92315	9.92588	9.86454	9.78356	9.82371	9.93457	9.90234	10.0152	10.2361	10.0089	10.0219	10.0062	9.99905	7.07623	7.90615	6.97827	8.24837	8.55789	11.6799	7.67491	9.6794		-0.151471	-0.0723159	-0.112301	-0.0758997	2.84964	1.95839	2.80529	1.57534	1.37668	-1.77759	2.34026	0.556672		-0.102997	1.46059	1.56358	0.0224096
CCATCATTGCAGTCGCCTATA	TRCN0000079272	Slc12a9	9.76787	9.80793	9.77232	9.77959	9.71549	9.75979	9.83701	9.83367	9.80491	9.82583	9.7444	9.69588	8.81164	8.46078	9.17261	9.44384	7.14652	9.08672	7.97942	7.81123	7.95982	8.5421	6.56598	8.79264		0.956229	1.34715	0.599706	0.335748	2.56897	0.673065	1.85759	2.02244	1.84509	1.28373	3.17842	0.903242		0.809708	1.79157	0.981861	0.023888
CCTCACAATCTCTCCACTCAT	TRCN0000079363	Slc7a1	13.5173	13.5015	13.442	13.3938	13.4334	13.5468	13.5169	13.4979	13.4428	13.453	13.3309	13.3235	13.386	13.5875	13.5141	13.7066	12.2105	11.6896	13.0065	12.8563	14.3624	14.7955	14.3632	15.639		0.131321	-0.0860656	-0.0721268	-0.312736	1.22294	1.85724	0.510394	0.641588	-0.919644	-1.34244	-1.03224	-2.31548		-0.0849017	-0.172207	-0.0873057	0.870177
GCTGATAGGTTTCACCATCTA	TRCN0000079367	Slc7a1	10.1844	10.2549	10.2393	10.2719	10.22	10.2488	10.2248	10.246	10.2813	10.2351	10.2795	10.3174	10.8116	9.67929	9.61421	9.58566	6.5036	8.6494	7.74475	7.26097	8.3058	8.30912	10.6149	11.2941		-0.62727	0.575592	0.625131	0.686263	3.71643	1.59937	2.48002	2.98506	1.97546	1.92594	-0.335427	-0.976757		0.314929	1.67126	1.35633	0.0623691
CCCTACAGAAATATAGACAAA	TRCN0000079758	Slc35a3	13.9512	13.8831	13.847	13.7604	13.7885	13.9624	14.0195	13.9295	13.8016	13.8977	13.6297	13.4851	14.3872	14.103	14.174	14.4223	14.0213	14.2828	14.3033	14.5342	13.0785	13.7561	13.1987	13.6439		-0.436021	-0.219864	-0.327028	-0.66189	-0.232773	-0.320367	-0.283802	-0.604716	0.723114	0.141539	0.43107	-0.158835		-0.411201	-0.0380963	0.373104	0.0670261
GTGGATACACTGCACAAGGTA	TRCN0000080951	Nudt1	6.75053	6.86646	6.86011	6.99818	6.86265	6.8894	6.93184	6.8409	6.87885	6.95044	7.08399	7.17281	5.38344	5.10505	5.08094	6.26731	1.83952	1.67733	3.26632	3.61711	6.28637	6.76604	6.19733	5.61008		1.36709	1.7614	1.77918	0.730867	5.02313	5.21207	3.66553	3.22378	0.592475	0.184397	0.886663	1.56272		1.40963	2.54385	1.13421	0.166389
GCCGGATGACAGCTACTGGTT	TRCN0000080952	Nudt1	6.93127	6.96054	6.91604	7.0308	7.09747	6.66701	6.7328	6.68043	6.99815	6.74027	7.17305	7.42093	7.06454	6.71123	6.47112	6.59162	5.90687	5.60161	6.63264	7.02429	4.9988	4.89054	5.26278	5.46474		-0.133275	0.249307	0.444919	0.439178	1.19059	1.0654	0.100156	-0.343855	1.99935	1.84973	1.91026	1.95619		0.250032	1.21598	0.965946	0.0213927
GCCAGGAATTGGATTCAGTTT	TRCN0000081058	Ppp3ca	10.2952	10.2512	10.301	10.2623	10.2727	10.2432	10.2662	10.2357	10.3132	10.2825	10.3404	10.3593	9.4041	9.28327	9.15941	9.28949	8.39501	5.63575	7.45284	6.58541	6.21511	7.72363	6.00903	6.93921		0.891072	0.967897	1.14161	0.972779	1.87772	4.60748	2.81335	3.65027	4.09807	2.55886	4.3314	3.42012		0.99334	3.41966	2.42632	0.000143634
GCTGGAAGAAAGTGTTGCATT	TRCN0000081059	Ppp3ca	8.50882	8.47457	8.49091	8.4557	8.48567	8.46337	8.44194	8.48633	8.4517	8.48368	8.55468	8.39573	8.53084	7.92608	7.23182	7.31134	8.69603	6.79533	7.30524	6.57737	7.1921	8.59185	6.41711	6.79065		-0.0220148	0.548482	1.25909	1.14436	-0.210365	1.66804	1.1367	1.90897	1.25959	-0.108167	2.13757	1.60507		0.732478	1.17468	0.442198	0.331643
CCAGATCATTTCCATCTACTT	TRCN0000081253	Ppp5c	11.1107	11.1244	11.0045	10.9995	10.9656	11.1718	11.1545	11.1329	11.0106	11.1049	10.8508	10.8523	10.9591	11.8811	11.3385	11.3998	10.8392	13.3061	8.69468	8.86339	11.2161	10.915	9.35571	9.85008		0.151611	-0.756681	-0.334031	-0.400337	0.126397	-2.13426	2.45985	2.26952	-0.205529	0.189897	1.49513	1.00219		-0.334859	0.650399	0.985258	0.115051
AGCTCCTGTATCCAGATCATT	TRCN0000081255	Ppp5c	9.76545	9.69969	9.71947	9.82764	9.86883	9.58915	9.5673	9.58029	9.78	9.59348	10.0436	10.3912	10.3917	10.2944	11.0298	10.5333	10.7491	9.35937	9.15303	9.91333	8.26338	9.47692	7.11916	8.46723		-0.6262	-0.59475	-1.31031	-0.705679	-0.880226	0.229779	0.414266	-0.33304	1.51662	0.11656	2.92442	1.92392		-0.809234	0.739038	1.54827	0.0108492
ACAAGTTGAAATGCCCTCATT	TRCN0000081885	Zbtb10	4.84503	4.77413	4.88835	4.93377	4.88374	4.85616	4.72738	4.84393	4.85606	4.71955	4.83065	4.88206	4.09239	4.21806	5.10757	3.67037	0	0	1.14079	1.09355	4.45049	3.07178	2.63052	3.02512		0.752645	0.556064	-0.219225	1.2634	4.88374	4.85616	3.5866	3.75038	0.405563	1.64777	2.20014	1.85694		0.588221	2.89841	2.31019	0.00543275
GATTTCAAGTATGGGTTGCTA	TRCN0000081886	Zbtb10	10.8098	10.7988	10.8461	10.8678	10.794	10.8046	10.7899	10.8063	10.8745	10.8875	10.9568	11.0403	10.7746	10.0356	10.1602	9.90687	9.46114	10.2847	8.88715	8.80608	9.77126	9.58792	8.96233	8.42087		0.0352151	0.763173	0.68594	0.960931	1.3329	0.519965	1.90276	2.00024	1.1032	1.29957	1.99448	2.61948		0.611315	1.59657	0.98526	0.0102363
CTTAGCTGTTGGGCTCTGATT	TRCN0000082023	Gpank1	5.29875	5.20155	5.32833	5.25821	5.62999	5.2864	5.08995	5.45691	5.4623	5.49418	5.43269	5.30389	2.49035	1.6132	0.557375	2.34845	0	4.34719	0	-1.90645	-0.0886661	-0.513185	-1.69141	0		2.8084	3.58835	4.77096	2.90976	5.62999	0.939218	5.08995	7.36336	5.55097	6.00736	7.1241	5.30389		3.51937	5.3761	1.85674	0.049541
GCGATATGATCTGTCCCGAAT	TRCN0000082050	Gtf2b	10.3355	10.2966	10.344	10.3863	10.3923	10.3044	10.2535	10.2515	10.3973	10.3139	10.4845	10.5286	11.2633	9.86073	10.4122	10.5438	10.8181	10.7366	8.78857	9.70042	9.91976	9.76216	8.56598	10.2167		-0.927765	0.435874	-0.0682827	-0.157472	-0.425891	-0.432118	1.46496	0.551048	0.477526	0.551759	1.91855	0.311966		-0.179411	0.552225	0.731637	0.105017
CAGCAATGACAAAGCAACAAA	TRCN0000082051	Gtf2b	10.9508	10.9262	10.8904	10.9253	10.9851	10.8736	10.8233	10.8786	10.9067	10.8895	10.9397	10.93	10.9466	10.9158	10.5908	9.1734	9.07848	9.57105	9.73935	8.59539	11.2115	11.9389	9.09404	10.0324		0.00426747	0.0103676	0.299644	1.75192	1.90662	1.30258	1.08393	2.28317	-0.304841	-1.04941	1.8457	0.8976		0.516549	0.995668	0.479119	0.433541
CGCAAGTGTATCCAGAAATAT	TRCN0000082219	Phf7	10.6652	10.7192	10.6853	10.7285	10.6919	10.6813	10.6567	10.7192	10.7101	10.6883	10.6567	10.6483	8.78825	9.51558	8.98184	8.45958	4.89161	6.2623	6.14488	5.82826	6.44661	7.27254	6.34751	8.86495		1.87696	1.20362	1.70344	2.26895	5.80032	4.41901	4.51182	4.8909	4.26346	3.41575	4.30924	1.78338		1.76324	4.17424	2.41099	0.000489438
AGACAATCTTTGTGTCCATTA	TRCN0000082222	Phf7	10.6838	10.6461	10.6713	10.6875	10.707	10.6459	10.6746	10.6687	10.6788	10.6747	10.694	10.7933	10.0142	9.99114	10.0062	10.3506	10.6218	8.30138	6.9965	7.50506	8.96933	10.1153	9.20492	9.05634		0.669586	0.654915	0.665104	0.336941	0.0851249	2.34456	3.67806	3.16365	1.70943	0.559449	1.48903	1.73699		0.581636	1.84579	1.26415	0.0212746
GCAAACCTCATGTACCACCTT	TRCN0000084578	Mxd1	6.79721	6.67103	6.81963	6.85647	6.77252	6.68433	6.72738	6.71399	6.86977	6.73143	7.10545	7.06703	8.20264	6.52009	8.02847	6.48287	8.26677	5.37777	6.73664	4.60135	5.26006	8.65507	7.33926	5.58583		-1.40543	0.150942	-1.20884	0.373595	-1.49424	1.30655	-0.00925519	2.11264	1.60971	-1.92364	-0.233808	1.4812		-0.522432	0.356144	0.878576	0.241479
CCACCAAATAGACCAGCTTCA	TRCN0000084582	Mxd1	10.6057	10.4825	10.5015	10.3638	10.4623	10.4986	10.5378	10.5273	10.4212	10.4506	10.3883	10.4151	10.7904	10.6956	11.2521	10.3135	10.8237	11.9813	10.0315	10.1069	10.5822	10.9246	9.65122	10.1662		-0.184661	-0.213055	-0.750648	0.0503171	-0.361393	-1.48277	0.506368	0.420377	-0.161047	-0.473949	0.737036	0.248857		-0.274512	-0.0708152	0.203697	0.518331
GCAGTCATAACAGAGCATCTT	TRCN0000084603	Gtf2h3	10.4693	10.4895	10.4895	10.5138	10.4605	10.4465	10.4643	10.4875	10.5191	10.5074	10.5598	10.5155	9.85855	9.45293	10.3036	10.352	5.93196	7.34976	8.28405	8.14748	10.1272	9.57913	5.22745	8.47633		0.610765	1.03655	0.185878	0.161798	4.52857	3.09671	2.18023	2.34007	0.391911	0.928269	5.33234	2.03921		0.498747	2.60466	2.10592	0.00913876
CTACATTCACAGAGTGAACAA	TRCN0000084605	Gtf2h3	11.3171	11.3326	11.3205	11.2938	11.283	11.3768	11.3773	11.3704	11.3042	11.3532	11.1684	11.0787	11.6408	11.7957	11.1785	11.121	10.5913	11.6967	10.7897	10.674	10.5824	10.7936	8.39074	9.85801		-0.323705	-0.463107	0.14194	0.172804	0.691766	-0.319873	0.587584	0.696345	0.721733	0.559602	2.7777	1.2207		-0.118017	0.866944	0.984961	0.0192361
GCGGTGTAGCAAGTGCAAGAA	TRCN0000084850	Tcea3	6.91393	6.78239	7.0064	7.05983	6.97394	6.70823	6.60284	6.74353	6.88562	6.81192	7.22542	7.25217	7.10506	6.01123	7.17628	5.8403	5.35197	6.31593	6.64714	6.1757	7.29288	9.1557	3.63052	4.02512		-0.191134	0.771162	-0.169882	1.21953	1.62197	0.392296	-0.0443021	0.56783	-0.407261	-2.34378	3.59491	3.22705		0.407418	0.826089	0.418671	0.600999
GAAGCTGAACAGTTGCCAGAT	TRCN0000084851	Tcea3	6.43348	6.11909	6.37697	6.51035	6.62999	6.18297	6.08995	6.17312	6.53585	6.43005	6.99484	7.01212	7.62405	5.87373	4.92993	4.10333	7.29121	5.94582	5.29607	4.72291	4.15926	6.15452	3.21548	6.48455		-1.19057	0.245357	1.44704	2.40701	-0.661227	0.237151	0.793887	1.45021	2.37659	0.275527	3.77936	0.527572		0.72721	1.09738	0.370174	0.703333
GATCCCATTGGTGAAGTCTTA	TRCN0000085631	Klf6	6.36222	6.37558	6.45077	6.41471	6.43099	6.2773	6.34453	6.31544	6.31298	6.5252	6.58935	6.44876	7.01392	4.78313	5.02614	5.02087	5.26775	4.02526	9.82792	4.07083	2.81822	3.73474	2.55652	6.17487		-0.651697	1.59245	1.42462	1.39384	1.16323	2.25204	-3.4834	2.24461	3.49475	2.79046	4.03284	0.273896		0.939804	1.59605	0.656249	0.52439
TGATGAGTTGACCAGACACTT	TRCN0000085632	Klf6	6.78908	6.55519	6.54954	6.65434	6.7599	6.49316	6.64077	6.53408	6.66734	6.69551	6.61201	6.72653	5.1506	5.60567	4.54444	5.33713	3.72933	3.89033	4.47577	3.22284	4.98815	8.00907	3.59399	7.34344		1.63847	0.949518	2.00511	1.31721	3.03057	2.60283	2.165	3.31124	1.67919	-1.31356	3.01802	-0.61691		1.47758	1.73455	0.256971	0.706594
GCTTGGTTGAACTATCCTAAT	TRCN0000085863	Tead1	6.67902	6.64407	6.58448	6.71033	6.70302	6.67049	6.54862	6.67363	6.57546	6.69551	6.61576	6.65133	4.90217	6.13153	5.82148	6.32573	-0.662983	0	0.681355	0.415481	-2.08867	1.48682	-0.106449	0.873117		1.77686	0.51254	0.762996	0.384609	7.366	6.67049	5.86726	6.25815	8.66412	5.20869	6.72221	5.77821		0.859251	6.56689	5.70764	6.83579e-07
CCTCACTTGTTTGCCGTGTTA	TRCN0000086218	Asb8	7.78908	7.72993	7.77648	7.82469	7.81341	7.69803	7.78062	7.66679	7.75126	7.8908	7.77819	7.74784	8.04275	7.73732	8.48811	7.9164	5.84481	8.5875	6.51108	4.13795	6.66288	7.91028	7.81241	8.66753		-0.253671	-0.00739542	-0.711636	-0.0917169	1.9686	-0.889465	1.26955	3.52885	1.08838	-0.01948	-0.0342277	-0.919688		-0.266105	0.749064	1.01517	0.107753
GTCAGCATCCTTCTTGATTAT	TRCN0000086220	Asb8	10.5045	10.5666	10.5802	10.6255	10.5861	10.4907	10.5303	10.4781	10.5537	10.5639	10.6255	10.4484	10.9681	10.4328	11.0127	10.91	7.24791	7.36001	8.8902	9.55503	9.08439	9.13906	8.95605	12.4647		-0.463625	0.133751	-0.432544	-0.284471	3.33824	3.13069	1.64008	0.923026	1.46928	1.42484	1.66949	-2.01636		-0.261722	1.44741	1.70913	0.0214413
GCAGCTAATCTTGCTGCACAA	TRCN0000086304	Pnpla7	12.3698	12.2903	12.359	12.3587	12.3957	12.238	12.2319	12.271	12.364	12.2942	12.5112	12.6172	12.6675	12.5487	12.5064	12.3484	13.1166	13.6154	13.4506	13.2188	12.3633	12.5431	12.2062	12.1632		-0.297661	-0.258455	-0.147323	0.0102056	-0.720841	-1.37737	-1.21873	-0.947791	0.000634048	-0.248883	0.304957	0.454042		-0.173308	-0.469248	-0.29594	0.2807
CCGTACCGAATCCTTTATCAA	TRCN0000087770	Tbc1d9	10.5802	10.4951	10.5044	10.4603	10.5358	10.5615	10.6478	10.5199	10.5639	10.5102	10.4642	10.4751	8.74707	9.37364	9.99706	9.82772	6.32191	6.78396	7.40074	7.46859	7.18513	8.11009	6.15408	7.1399		1.83317	1.1215	0.507368	0.632611	4.21386	3.77758	3.24702	3.05133	3.37877	2.40012	4.31009	3.33523		1.02366	3.46425	2.44059	0.000488411
GCTCTGTAAGACCATGTACAA	TRCN0000087771	Tbc1d9	10.4602	10.4822	10.4756	10.5119	10.4296	10.4924	10.4567	10.4685	10.5358	10.4859	10.5279	10.5697	9.07155	8.57899	8.79099	8.74826	5.61004	5.31593	5.36084	5.07083	8.94613	9.42541	7.07677	11.2314		1.38862	1.90321	1.68464	1.76367	4.81956	5.17649	5.0959	5.39767	1.58972	1.06046	3.4511	-0.661693		1.68504	3.24115	1.55611	0.0984602
GCAGAGAAATTTCACAGCAAA	TRCN0000087863	Gspt2	10.7474	10.7157	10.6839	10.7067	10.7401	10.7154	10.7173	10.7038	10.6641	10.6462	10.6775	10.6343	9.92558	10.0589	10.2232	9.83629	10.5291	10.05	9.10867	9.83502	8.82796	9.22716	8.29727	8.80122		0.82181	0.656792	0.460652	0.870383	0.211014	0.665408	1.60868	0.868775	1.83611	1.41902	2.38021	1.83304		0.702409	1.35278	0.650373	0.0403933
GCCTTAGATACAAACCAGGAA	TRCN0000087866	Gspt2	4.02191	4.21383	3.54954	4.27811	4.06705	3.70144	4.04714	3.47268	3.93647	4.27642	3.95404	3.87296	-0.317001	4.8096	1.20945	1.93341	0	4.07588	0	0.415481	0.496296	0	0.630516	0		4.33891	-0.595772	2.34009	2.3447	4.06705	-0.374442	4.04714	3.0572	3.44018	4.27642	3.32352	3.87296		2.10698	3.21375	1.10677	0.381683
CGACAGCAAGTCAGAACCTTA	TRCN0000088224	Evi5	9.80697	9.76946	9.79337	9.76732	9.86736	9.73715	9.66291	9.77487	9.85921	9.71171	9.89443	9.95585	9.27312	9.27439	9.15623	9.6298	7.66943	8.81036	7.53466	7.4489	7.81371	9.04587	7.44558	7.19905		0.533848	0.49507	0.637147	0.137527	2.19793	0.926788	2.12825	2.32597	2.0455	0.665833	2.44885	2.7568		0.450898	1.93699	1.48609	0.000533444
GAAGCCATTATGGGTTTGAAA	TRCN0000088227	Evi5	9.75784	9.62695	9.6957	9.80167	9.84781	9.56831	9.53047	9.62419	9.79506	9.68753	10.1657	10.4268	9.29172	8.84522	9.43258	9.24478	6.56584	7.1278	6.09498	5.92644	8.39515	7.19647	6.16034	9.39188		0.466121	0.78173	0.263126	0.556891	3.28198	2.44052	3.43549	3.69775	1.39991	2.49106	4.00539	1.03489		0.516967	2.72337	2.2064	0.000521386
ACCAGGAAGGATTGGGTTATA	TRCN0000088285	Gpank1	10.9226	10.8589	10.8922	10.8075	10.8569	10.8802	11.0154	10.8885	10.8629	10.8767	10.8208	10.7177	10.5437	10.5338	10.9096	11.0895	9.82486	10.6478	8.24264	9.91253	9.16636	8.54119	9.05762	11.8555		0.378926	0.325103	-0.0173901	-0.282033	1.03202	0.232391	2.77278	0.975977	1.69657	2.33548	1.76314	-1.13782		0.101151	1.20882	1.10767	0.0427871
GCTCATTACCTCAGCTACTTA	TRCN0000088406	Anapc5	10.5515	10.6186	10.618	10.6638	10.5662	10.6444	10.5486	10.5728	10.6411	10.6292	10.6115	10.7134	10.2044	10.4802	9.8497	9.89148	8.74428	10.4046	9.77147	9.9616	9.92884	10.1143	9.13275	10.0397		0.347139	0.138385	0.768258	0.772345	1.82189	0.239762	0.777149	0.611165	0.712249	0.514873	1.47879	0.673662		0.506531	0.853692	0.347161	0.187455
CTGAAGGATATGGAACAATTT	TRCN0000088407	Anapc5	11.0974	11.1056	11.0716	11.0196	11.0136	11.1409	11.1616	11.1306	11.0274	11.1418	10.9844	10.9057	11.1779	11.81	10.9948	10.7634	8.05126	7.68958	8.01115	7.73741	9.95368	9.76952	10.331	10.8451		-0.0804975	-0.70445	0.0767387	0.256179	2.96229	3.45136	3.15042	3.39317	1.07371	1.37227	0.653431	0.0605475		-0.113007	2.01465	2.12766	0.00287328
CCAATCGCAAGGATTCTTCTT	TRCN0000088436	Ciz1	10.6228	10.6424	10.649	10.5986	10.5849	10.6888	10.64	10.653	10.6371	10.6591	10.561	10.5598	10.929	11.3028	10.8161	12.1905	8.87164	9.24096	9.57958	9.68508	10.0912	9.94795	10.0297	9.64754		-0.306219	-0.660398	-0.167088	-1.59195	1.71325	1.44788	1.06047	0.967944	0.545839	0.711105	0.531315	0.912278		-0.681413	0.98626	1.66767	0.00753593
CCCAATCGCAAGGATTCTTCT	TRCN0000088437	Ciz1	9.81932	9.85131	9.85511	9.81535	9.75609	9.85157	9.83952	9.75808	9.88674	9.83892	9.75164	9.83714	9.84539	9.68511	9.44568	9.17896	6.38505	7.78776	7.84626	8.14476	8.26227	9.90432	8.31982	9.9169		-0.026066	0.166201	0.409432	0.636392	3.37105	2.06381	1.99326	1.61332	1.62447	-0.0653941	1.43183	-0.0797664		0.296489	1.49407	1.19758	0.0214716
CCAACCTCATTGACAGGCATT	TRCN0000088793	Baiap2l1	8.24925	8.26192	8.24781	8.1691	8.22325	8.15716	8.19664	8.15857	8.24355	8.19086	8.13052	8.04795	6.67452	6.88622	5.54444	6.04193	2.07398	5.35745	5.31798	4.41548	4.85385	6.7442	5.90105	3.25778		1.57473	1.3757	2.70337	2.12717	6.14927	2.7997	2.87866	3.74309	3.3897	1.44665	2.22947	4.79017		1.94524	3.42834	1.4831	0.0342008
GCCAGTCACATACACTACTAT	TRCN0000088796	Baiap2l1	7.68925	7.83898	7.8167	7.80938	7.81097	7.76631	7.74758	7.73048	7.80103	7.74613	7.90594	7.76271	9.70779	6.31364	6.41891	7.17499	1.75205	5.18369	6.10342	5.75889	6.77861	6.97332	3.80044	5.49761		-2.01854	1.52534	1.39779	0.634388	6.05891	2.58262	1.64416	1.97159	1.02242	0.772818	4.1055	2.2651		0.384744	2.55289	2.16815	0.0769774
GCCCTTCCATCAGGATTAAAT	TRCN0000088798	Tab1	9.71307	9.78754	9.83785	9.80253	9.82951	9.73632	9.70518	9.71606	9.86721	9.73143	9.96508	10.0363	10.051	9.61742	9.11798	10.0644	7.35383	10.0025	9.00778	9.14951	9.9978	10.1631	10.4966	10.3059		-0.337886	0.170116	0.719865	-0.261879	2.47568	-0.266219	0.697394	0.566546	-0.13059	-0.43164	-0.531479	-0.269614		0.072554	0.26376	0.191206	0.665489
GCGATGATTGACACCGAGTTT	TRCN0000088799	Tab1	10.5982	10.6562	10.6006	10.7058	10.7343	10.5646	10.4322	10.5504	10.6302	10.5784	10.7375	10.9187	10.6392	10.2486	10.2303	10.0511	8.66644	9.88013	8.77279	9.66815	9.0361	10.0749	10.3005	10.8932		-0.0410151	0.407591	0.370262	0.654699	2.06788	0.68445	1.65941	0.882276	1.59411	0.50345	0.43708	0.0255671		0.347884	0.981778	0.633894	0.0541995
CCAGGAGAATACCAACACATT	TRCN0000088805	Akap12	11.2378	11.2083	11.1588	11.0286	11.0972	11.2514	11.3156	11.2694	11.1048	11.204	10.9194	10.8578	10.2409	9.62443	10.2802	9.94929	7.78823	9.5962	7.89567	7.41548	9.70859	9.36844	7.67491	8.81172		0.996908	1.58385	0.878577	1.07931	3.30899	1.65519	3.41994	3.85387	1.39624	1.83553	3.24453	2.04604		1.13466	2.59504	1.46038	0.00326063
GCAGAGTCCATCCCAATAATA	TRCN0000088807	Akap12	10.5473	10.6128	10.6106	10.6861	10.6071	10.5653	10.5716	10.6147	10.6609	10.6401	10.7423	10.7375	8.11554	8.86587	7.07195	7.38736	3.99998	5.81782	8.22148	6.18102	11.9397	8.08797	9.79693	10.3598		2.43174	1.74696	3.53861	3.29874	6.60711	4.74746	2.35016	4.43366	-1.27872	2.55212	0.945329	0.377699		2.75401	2.59185	-0.16216	0.874993
GCCTTAAAGGAGTTGGAGCAA	TRCN0000088810	Ikbkg	10.6193	10.5945	10.6169	10.5119	10.5947	10.5662	10.5248	10.5509	10.6255	10.5614	10.707	10.8917	9.69737	10.1815	9.72658	9.72077	8.08521	9.53135	7.82729	8.78093	10.4381	10.397	8.18817	9.84242		0.921976	0.412979	0.890316	0.791158	2.50949	1.03486	2.69754	1.76996	0.187427	0.164451	2.51878	1.04925		0.754107	1.49147	0.737362	0.0897364
GTAGCCAAACAGGAATTGATT	TRCN0000088811	Ikbkg	10.572	10.5464	10.5967	10.5943	10.6634	10.5585	10.5386	10.55	10.6593	10.5459	10.715	10.8215	10.9053	10.5715	11.0728	10.6766	11.6234	11.2298	10.9198	10.3876	10.2372	10.2736	9.76597	9.51256		-0.333373	-0.0250992	-0.476071	-0.082217	-0.959973	-0.671345	-0.381154	0.162359	0.422101	0.272314	0.949073	1.30899		-0.22919	0.137796	0.366986	0.246377
GCACTACCTGTGTGGAAGATA	TRCN0000089560	Cldn6	10.3341	10.3396	10.3672	10.3883	10.2823	10.3688	10.3608	10.3959	10.4335	10.4078	10.426	10.5208	10.388	10.4374	11.0879	10.973	9.06153	8.86716	8.26256	8.90493	9.86989	11.3558	10.2397	11.9538		-0.0538863	-0.0977524	-0.720702	-0.584663	1.22072	1.50163	2.09823	1.49101	0.563646	-0.947978	0.186349	-1.43296		-0.364251	0.585082	0.949333	0.0766325
CAGACATTACATGGCCTGCTA	TRCN0000089561	Cldn6	10.0825	10.001	10.0502	10.0605	10.0425	10.0295	10.0016	10.0864	10.0717	10.0846	10.1207	10.25	10.0586	13.2285	9.39793	9.8423	6.114	7.43707	7.68417	7.14612	8.94407	8.48211	7.75567	7.37915		0.0238881	-3.22753	0.652244	0.218244	3.92851	2.59241	2.31745	2.94031	1.12764	1.60253	2.365	2.87083		-0.583289	2.46808	3.05137	0.0352425
GCTGCTTAGATCCCTCAGCTT	TRCN0000090068	Tubb5	9.93649	9.89866	9.96756	9.98802	9.98021	9.8596	9.79945	9.85488	10.0028	9.9066	10.16	10.3384	9.33764	8.97807	10.3408	10.0657	8.10851	8.13527	7.52213	6.79746	6.7347	6.77222	5.06348	8.06404		0.598854	0.920599	-0.373278	-0.0776762	1.8717	1.72432	2.27732	3.05742	3.26812	3.13438	5.09649	2.27436		0.267125	2.83802	2.57089	0.000384122
GACCGAATCTCTGTGTACTAT	TRCN0000090070	Tubb5	10.6262	10.5275	10.6112	10.6901	10.7218	10.4865	10.4784	10.5277	10.6374	10.5604	10.8933	11.0625	8.41856	7.86744	8.39838	8.07976	11.1532	7.2813	6.23978	5.54476	10.1042	6.10642	4.45834	4.11258		2.20765	2.66004	2.21282	2.61029	-0.431352	3.20521	4.23867	4.98296	0.533173	4.45395	6.43494	6.94995		2.4227	3.79594	1.37324	0.182783
CCGTCAGGTCTATGGCTTAAA	TRCN0000091074	Evl	7.78772	7.5284	7.67964	7.58813	7.5849	7.47337	7.65936	7.57482	7.65287	7.61126	7.5644	7.79197	7.93803	7.03947	7.90104	7.89919	3.21149	4.87611	5.81064	6.44228	7.09869	7.72681	8.41319	7.8299		-0.150309	0.488934	-0.221401	-0.311064	4.37341	2.59725	1.84873	1.13254	0.554185	-0.115551	-0.848792	-0.0379212		-0.0484597	1.18798	1.23644	0.0842693
CCTCATGGAAGAAATGAACAA	TRCN0000091075	Evl	10.8291	10.8439	10.828	10.7733	10.7545	10.8702	10.8938	10.8199	10.8006	10.8417	10.6913	10.5292	10.1486	10.153	11.1337	10.385	9.36031	9.27454	9.99679	9.24203	8.54886	9.76294	8.60206	8.3031		0.680537	0.690918	-0.305685	0.388288	1.3942	1.59569	0.89705	1.57784	2.25172	1.07872	2.08924	2.22608		0.363514	1.63882	1.2753	0.00395148
CCAATGAATATCTCCTAGCTT	TRCN0000091095	Katnb1	11.4122	11.387	11.2862	11.2602	11.2864	11.5163	11.4623	11.4425	11.3276	11.3683	11.1179	11.127	10.7073	10.8055	10.8615	10.681	11.6114	11.0595	9.79835	9.83122	11.0345	11.039	9.63502	10.0698		0.704974	0.58148	0.424763	0.5792	-0.324957	0.456844	1.664	1.61125	0.293065	0.329285	1.48285	1.05722		0.572604	0.821194	0.24859	0.379546
GCGCAGTAATTTCTACATTAA	TRCN0000091203	Epb4.1l2	10.5601	10.5836	10.5606	10.5711	10.5055	10.6311	10.5502	10.5601	10.5232	10.5405	10.4706	10.5071	10.2903	9.82914	10.7966	10.6701	6.9094	6.91834	9.24264	9.57737	8.87278	9.27744	15.7429	8.59801		0.269747	0.754415	-0.23608	-0.0990011	3.59606	3.71272	1.30751	0.982772	1.65046	1.26303	-5.27226	1.9091		0.17227	1.14367	0.971404	0.366698
CCGATTGTCATCATCAAGCAA	TRCN0000091315	Scin	10.7254	10.7733	10.7573	10.7213	10.8031	10.7889	10.6793	10.7309	10.7389	10.7366	10.7089	10.7224	9.72432	9.64983	9.852	9.60701	8.70042	9.4034	10.926	11.0197	9.27108	8.78602	8.97924	7.9163		1.00106	1.12352	0.905281	1.11427	2.10272	1.38551	-0.246714	-0.288778	1.46777	1.95057	1.72968	2.80612		1.03603	1.36336	0.327329	0.429993
GCTACATTATCCTCTACACTT	TRCN0000091316	Scin	10.933	11.0124	10.9556	10.9957	10.9077	11.0266	11.0032	11.0294	10.9715	11.0346	10.9141	10.8688	11.5177	11.875	10.8767	11.1937	9.53382	8.62198	8.76815	8.04192	11.7016	11.8704	10.0488	9.89518		-0.584709	-0.86258	0.0788794	-0.198003	1.37386	2.40462	2.235	2.98751	-0.730091	-0.835821	0.865342	0.973641		-0.391603	1.15926	1.55086	0.0179868
GCATACAATTTACAGGCATTT	TRCN0000091688	Mkln1	10.8197	10.8882	10.8917	10.8912	10.7894	10.9026	10.937	10.8856	10.8619	10.9473	10.8022	10.769	9.21438	9.36976	8.77931	8.22189	5.88134	9.15968	9.36128	7.90252	8.89433	8.6634	7.08338	8.27494		1.60528	1.51841	2.11236	2.66931	4.90805	1.74291	1.57571	2.98305	1.9676	2.28385	3.71882	2.49406		1.97634	2.70926	0.732919	0.157356
GCATGACAAATTGGTGTTAAA	TRCN0000091691	Mkln1	10.6443	10.6896	10.6436	10.6732	10.6243	10.6563	10.7298	10.6904	10.6497	10.661	10.5375	10.4676	9.76148	9.80303	9.82148	9.38736	7.61933	9.70172	9.60134	8.70734	7.04576	8.45356	7.05342	7.80254		0.882856	0.886534	0.822166	1.28588	3.00492	0.954578	1.12842	1.98303	3.60397	2.20744	3.4841	2.66505		0.969359	2.37894	1.40958	0.00486137
GAGATTCAAGAGAAGGGCTTT	TRCN0000091729	Ivl	9.02998	9.10597	9.12029	9.12308	9.19633	9.08921	8.97474	9.02793	9.15856	9.05631	9.36593	9.54216	9.45201	9.06441	9.17733	9.19001	8.56824	9.58039	9.13514	8.75266	9.76581	8.89691	9.6243	9.43069		-0.422029	0.0415581	-0.0570394	-0.0669281	0.628095	-0.49118	-0.160401	0.275277	-0.607256	0.159394	-0.258375	0.111473		-0.12611	-0.0428716	0.0832379	0.650111
GCCAGAATTACACCTAGGAAA	TRCN0000091730	Ivl	11.0671	11.1244	11.0631	11.0559	11.0946	11.0641	11.0726	11.1159	11.09	11.0742	11.0682	11.1242	11.5436	11.749	11.4328	11.2421	9.81781	10.4776	10.5556	10.7363	12.4533	10.7713	10.7696	10.3259		-0.476454	-0.624637	-0.369716	-0.186257	1.27677	0.586484	0.517011	0.379625	-1.36327	0.302939	0.298649	0.798319		-0.414266	0.349567	0.763833	0.0267374
CGTTAGTTAGAATGAGGGTTT	TRCN0000091813	Tmod3	12.7076	12.7029	12.7327	12.6932	12.6846	12.6907	12.7495	12.7262	12.725	12.7269	12.7407	12.6806	13.2932	12.9315	13.351	13.2842	12.7546	13.6089	13.257	13.2873	12.6171	13.4898	12.6401	13.6221		-0.585628	-0.228617	-0.618289	-0.591026	-0.0699193	-0.918162	-0.507495	-0.561131	0.107932	-0.762914	0.100642	-0.9415		-0.50589	-0.444068	0.0618215	0.738397
GCCATCACCAAGGCTCAGAAA	TRCN0000093051	Hist3h2ba	9.36632	9.43382	9.40411	9.47253	9.50433	9.39243	9.30237	9.39723	9.48551	9.37244	9.59078	9.60329	8.73828	8.36475	8.45392	7.83829	8.00708	6.2009	7.13668	6.89768	7.44855	9.25445	8.75567	7.97465		0.628041	1.06907	0.950184	1.63423	1.49725	3.19153	2.16568	2.49955	2.03695	0.117994	0.835108	1.62864		1.07038	1.74659	0.676206	0.121493
GAGCTACTCCATCTACGTGTA	TRCN0000093052	Hist3h2ba	7.46102	7.29119	7.42015	7.56604	7.58919	7.21907	7.29598	7.24603	7.52433	7.41907	7.92869	8.11028	7.84035	7.99978	8.40466	8.67037	7.26183	5.81782	6.05204	6.09918	6.55519	8.58748	5.43787	8.95822		-0.379322	-0.708597	-0.984505	-1.10433	0.327356	1.40126	1.24394	1.14685	0.969141	-1.1684	2.49081	-0.847944		-0.794189	0.695377	1.48957	0.0103992
GCACAAGTTCTGGATAAGTTT	TRCN0000093430	Asap1	11.2155	11.2709	11.2381	11.3426	11.2615	11.2552	11.2417	11.2156	11.2315	11.2511	11.2624	11.1532	9.3895	9.40002	10.0115	10.3705	11.1166	7.63575	9.74408	8.12284	7.49442	8.76449	7.95425	8.10514		1.82604	1.87093	1.22658	0.972107	0.144871	3.61941	1.49764	3.09277	3.73712	2.48664	3.3082	3.04807		1.47391	2.61684	1.14293	0.0419609
CCTGAATGTATCCGTGATCTT	TRCN0000093501	Sypl	12.5385	12.5381	12.5143	12.4729	12.4806	12.5834	12.5502	12.5689	12.4812	12.539	12.3401	12.3528	13.7022	13.8084	13.176	12.8645	12.8773	12.6873	12.0293	12.164	11.0122	12.9969	9.5783	10.7363		-1.1637	-1.2703	-0.661736	-0.391583	-0.396765	-0.10384	0.520924	0.404925	1.46907	-0.457928	2.76185	1.61657		-0.871829	0.726851	1.59868	0.00564379
CCACACAGTGTTTCACTCAAT	TRCN0000093612	Vapa	11.1236	11.1468	11.0769	11.0755	11.0247	11.2017	11.1821	11.1057	11.0816	11.153	10.9751	10.9207	11.4658	10.8946	10.9841	10.6855	8.66793	9.2073	8.95922	9.11661	8.71385	10.2896	7.14779	9.12157		-0.342208	0.252215	0.0928562	0.390037	2.35675	1.99444	2.2229	1.98906	2.36771	0.863407	3.82734	1.7991		0.0982252	2.17759	2.07936	0.000101465
ACAGATGTAGTCACTACAAAT	TRCN0000093613	Vapa	10.9746	10.9735	10.9905	11.0075	10.9332	11.0259	11.054	11.0695	10.9654	11.0807	10.8698	10.827	10.2871	10.5893	9.83914	9.49119	6.87359	8.91921	9.0433	8.66341	10.3452	8.70032	7.50826	8.13886		0.687527	0.384173	1.1514	1.51633	4.05962	2.10671	2.01075	2.40611	0.620199	2.38041	3.36151	2.68815		0.934856	2.45418	1.51932	0.00590267
CCTGTCCATCTCACAGTCAAA	TRCN0000093809	Dpm2	9.82364	9.78342	9.79225	9.75006	9.72883	9.79808	9.82185	9.77646	9.80936	9.75888	9.79148	9.7322	9.31645	9.18559	8.96616	8.39829	6.08297	6.89033	7.60617	8.56726	7.54069	8.49804	9.53259	8.66174		0.507193	0.597839	0.826092	1.35177	3.64586	2.90775	2.21568	1.2092	2.26867	1.26084	0.258893	1.07046		0.820723	1.85467	1.03395	0.039869
GCATGTCATCCACAAATACTT	TRCN0000093812	Dpm2	11.2376	11.2923	11.2829	11.312	11.2441	11.3234	11.2977	11.2856	11.306	11.2551	11.285	11.2148	10.9041	10.9109	11.2235	10.0966	9.71748	10.4741	9.16567	9.58139	9.73907	9.53257	8.68254	9.8961		0.333468	0.38139	0.0594536	1.21534	1.52665	0.849244	2.13202	1.70423	1.56688	1.72254	2.60241	1.31874		0.497414	1.67784	1.18043	0.00800345
CGTCACATTTCGCTCTCTGTA	TRCN0000094379	Pcdhb22	10.2203	10.1514	10.1614	10.15	10.2379	10.0547	10.0799	10.088	10.1597	10.0988	10.2364	10.3526	10.6533	10.4923	10.2303	10.177	8.87294	10.6881	8.37832	8.69811	11.1414	11.537	9.20946	9.33891		-0.432959	-0.340911	-0.0689401	-0.0269872	1.36495	-0.633382	1.70158	1.38992	-0.981634	-1.43825	1.02695	1.01368		-0.217449	0.430475	0.647924	0.188313
GCCTATGATGAACCTTGGTTA	TRCN0000095087	Setbp1	12.774	12.8259	12.8403	12.8603	12.7989	12.8318	12.8003	12.792	12.8642	12.8383	12.8736	12.9618	12.3383	12.216	12.4609	12.2969	12.7587	11.0628	12.6125	11.9721	12.129	12.1128	11.5049	11.5813		0.435764	0.609937	0.379451	0.563436	0.0401829	1.76904	0.187874	0.819874	0.735228	0.72545	1.36875	1.38046		0.497147	0.878357	0.38121	0.119945
GCTGGATAAGAAGACCATCAA	TRCN0000095088	Setbp1	10.8296	10.8087	10.8357	10.8373	10.7996	10.817	10.8324	10.8356	10.8386	10.818	10.8933	10.8775	11.4368	11.3723	11.4196	11.3916	8.59989	9.66911	9.93313	9.61024	9.7215	10.931	8.69553	9.53845		-0.607245	-0.563568	-0.583897	-0.55433	2.19971	1.14794	0.899311	1.22534	1.11707	-0.112948	2.19775	1.33907		-0.57726	1.25165	1.82891	0.000208041
GTGTTCGCTTTGAACCAGGAA	TRCN0000095177	Npas1	9.56306	9.46625	9.64778	9.61086	9.71091	9.40554	9.38935	9.4584	9.62247	9.45264	9.95773	10.1862	9.98078	9.82103	10.402	10.5466	9.33231	9.8024	9.94638	10.5303	9.06489	10.3362	9.36048	11.3565		-0.417717	-0.354778	-0.754185	-0.935719	0.378593	-0.396855	-0.557036	-1.07187	0.557583	-0.883583	0.59725	-1.1703		-0.6156	-0.318277	0.297323	0.336177
GCAATGCTGAAGGTAGTCAAA	TRCN0000095178	Npas1	10.8842	10.9408	10.9107	10.9905	10.916	10.9193	10.9211	10.9413	10.9704	10.9629	10.9842	10.9639	10.715	11.4083	11.6647	11.9968	6.96151	9.64574	8.68206	9.4478	8.33129	9.93079	7.63277	7.77733		0.169147	-0.46747	-0.753971	-1.00633	3.95445	1.27359	2.23901	1.49354	2.63913	1.03213	3.35144	3.18658		-0.514657	2.39623	2.91089	7.8164e-05
GTTCTTGAACAACACCACTAA	TRCN0000095427	Tfap2b	10.1954	10.2984	10.253	10.2623	10.2515	10.2549	10.2296	10.2792	10.2902	10.2708	10.2827	10.255	10.343	10.1514	11.0612	11.7794	8.37594	7.47765	9.65433	9.90934	15.5649	10.5216	8.77925	8.67976		-0.147566	0.14702	-0.808227	-1.51715	1.87554	2.77723	0.575229	0.369856	-5.27466	-0.250775	1.5035	1.57527		-0.58148	0.393898	0.975378	0.332238
GCAACTTTGCACGCTTCATTA	TRCN0000095451	Setd1b	10.7505	10.8193	10.7753	10.923	10.9322	10.7421	10.6716	10.7125	10.7952	10.7456	10.9056	10.8319	9.466	9.02118	8.25682	7.78099	5.0919	6.34719	8.19311	7.7853	8.44952	8.73158	8.86222	9.4585		1.28453	1.7981	2.51852	3.14196	5.84032	4.39493	2.47846	2.92724	2.34568	2.01401	2.04334	1.37337		2.18578	2.92717	0.74139	0.289147
CCAGATTGATTCAGACATCGA	TRCN0000095453	Setd1b	10.5631	10.5403	10.5194	10.4412	10.4797	10.5327	10.534	10.567	10.4979	10.5149	10.429	10.3672	10.669	10.4519	11.3212	10.7101	8.36676	9.16846	10.2694	7.98382	9.34857	10.9341	8.52776	9.78966		-0.10596	0.0884522	-0.801783	-0.268961	2.11295	1.3642	0.264595	2.58323	1.14932	-0.419136	1.90122	0.577587		-0.272063	1.19175	1.46381	0.00497297
GCACATTCAATGGCAGGAAAT	TRCN0000095474	Zfp810	11.1797	11.2482	11.2397	11.259	11.2153	11.2038	11.199	11.2261	11.2568	11.2351	11.2889	11.2414	10.1661	10.0822	9.67743	9.49883	9.12764	8.31725	7.88103	8.22541	9.49348	8.75594	8.22894	8.92297		1.01365	1.16602	1.56232	1.76016	2.08766	2.88659	3.31794	3.0007	1.7633	2.47911	3.05997	2.31842		1.37554	2.61421	1.23867	0.000940045
GCTTTCTACTGTAATTCACAA	TRCN0000095478	Zfp810	11.5227	11.5684	11.5676	11.5796	11.5256	11.5457	11.5569	11.5502	11.5606	11.5785	11.5942	11.5204	10.5253	10.3636	10.8788	10.6155	10.2608	11.1005	10.1364	11.6706	10.7337	10.5605	9.97969	12.4008		0.997328	1.20476	0.688734	0.96411	1.2648	0.445202	1.42051	-0.120437	0.826849	1.01795	1.61453	-0.880437		0.963734	0.698622	-0.265112	0.426893
GCTCTTTCAGCACAAGAAGAT	TRCN0000095802	Zfp422	10.4606	10.5185	10.5158	10.5781	10.5565	10.525	10.4421	10.4663	10.5604	10.5518	10.612	10.5915	9.56105	9.65486	9.2775	9.23643	5.15293	6.89386	7.51108	11.3986	7.46592	6.57428	4.39605	6.29938		0.899548	0.863675	1.23828	1.3417	5.4036	3.63113	2.93107	-0.932324	3.09446	3.97754	6.21596	4.29217		1.0858	3.5767	2.4909	0.0130271
GCCAGGTAAAGGGAGCCACTT	TRCN0000095803	Zfp422	9.53822	9.46689	9.6395	9.59756	9.57448	9.39032	9.45673	9.42536	9.62416	9.53116	9.79066	10.0444	8.11867	7.82265	8.39568	7.5432	5.70625	5.42736	7.01451	9.2509	6.4349	7.61953	7.32818	7.77599		1.41955	1.64424	1.24382	2.05436	3.86823	3.96296	2.44222	0.174456	3.18926	1.91163	2.46248	2.26841		1.59049	2.53496	0.944464	0.0719668
CTCCAGATACCCAATGGATTT	TRCN0000096053	Smad7	9.30826	9.28028	9.32058	9.15706	9.20334	9.24031	9.32181	9.24431	9.27353	9.26012	9.2623	9.30177	8.26043	8.43975	8.60722	8.59756	7.5786	7.66911	7.00328	7.62883	8.26448	8.81848	7.01939	8.73179		1.04783	0.840531	0.713358	0.559502	1.62474	1.57119	2.31852	1.61548	1.00905	0.441642	2.24291	0.569983		0.790306	1.42419	0.633884	0.0424368
GCACTGCTAGTGCAAGAACTT	TRCN0000096165	Sra1	10.1722	10.2339	10.2513	10.2725	10.2306	10.2191	10.2071	10.1782	10.2868	10.1822	10.3222	10.2618	11.2975	11.0374	10.7607	11.4012	6.74074	7.81223	8.98571	8.03607	9.34335	9.98832	8.84094	8.1326		-1.1253	-0.803432	-0.509379	-1.12865	3.48985	2.40685	1.22143	2.14217	0.943448	0.193911	1.48128	2.1292		-0.891689	1.75101	2.6427	7.77445e-05
GCTGTTGTTAAGACCAATGCA	TRCN0000096791	Ddx19b	9.80125	9.83997	9.83785	9.8904	9.84841	9.7933	9.79072	9.77686	9.84105	9.80947	9.9109	10.0017	10.9799	10.7119	10.8036	10.6049	6.35938	6.99598	9.24788	7.86504	12.3831	8.5138	10.1816	13.0875		-1.17866	-0.871923	-0.965761	-0.714554	3.48902	2.79732	0.542832	1.91181	-2.54209	1.29567	-0.270748	-3.08578		-0.932725	0.517255	1.44998	0.129123
GCGATGTGTCTTGAGCTAATA	TRCN0000096809	Eif4g1	10.3429	10.4173	10.3732	10.4758	10.3947	10.3674	10.2771	10.325	10.4437	10.3957	10.5081	10.5872	3.32686	3.07263	1.83748	2.04889	1.55941	-1.7821	1.26632	1.67852	3.12079	2.60229	-1.69141	2.22675		7.01606	7.34469	8.53574	8.42688	8.8353	12.1495	9.0108	8.64645	7.32291	7.79342	12.1995	8.36045		7.83084	9.2898	1.45896	0.0847808
GCTGTATGAAACACTAGAATT	TRCN0000096811	Eif4g1	10.7072	10.7461	10.7565	10.7389	10.6553	10.8096	10.794	10.7826	10.7455	10.8086	10.6385	10.6059	6.67735	5.69357	5.50491	6.8443	5.47315	4.32643	4.46271	4.84844	3.37077	5.42541	3.70091	6.36853		4.0298	5.05256	5.2516	3.89459	5.1821	6.48314	6.33124	5.93416	7.37477	5.38318	6.93756	4.23734		4.55714	5.98294	1.4258	0.0198463
GCATCAATGAACTGATGGATA	TRCN0000096839	Eif3c	10.69	10.7689	10.7189	10.7478	10.6391	10.7236	10.7467	10.7356	10.7514	10.748	10.7039	10.6775	5.69981	4.78313	3.55738	4.27918	4.871	2.38783	3.17321	2.67852	4.3376	5.83849	3.70091	2.09551		4.99017	5.98581	7.16151	6.46865	5.76815	8.33577	7.57353	8.05707	6.41382	4.90947	7.00297	8.58203		6.15153	7.08035	0.928819	0.188026
GTACTACAAGTTTGACTACAA	TRCN0000096842	Eif3c	11.3703	11.4157	11.3975	11.3756	11.3298	11.4159	11.4624	11.4055	11.3847	11.4086	11.343	11.3212	3.683	6.39018	5.91493	4.07637	4.03746	3.61022	6.01227	4.64814	5.69269	5.5529	3.06348	2.56117		7.6873	5.02548	5.48257	7.2992	7.29233	7.80573	5.45018	6.75733	5.69201	5.85569	8.2795	8.76007		6.37364	6.9866	0.612969	0.469616
CCGCATCTATGACCTCAACAT	TRCN0000097165	Nck2	9.89196	9.81601	9.8873	9.87741	9.882	9.84041	9.81421	9.84583	9.9049	9.84406	9.93619	10.0064	9.54602	9.39292	8.64028	8.52711	4.39591	6.45152	6.81064	6.7446	9.40519	9.58748	7.73275	8.9096		0.345937	0.423086	1.24701	1.3503	5.48609	3.38889	3.00357	3.10122	0.499709	0.25658	2.20343	1.09682		0.841584	2.37954	1.53795	0.0473821
CCCTGAATGGTGGAAATGCAA	TRCN0000097166	Nck2	9.98562	9.90436	9.92015	9.84108	9.81798	9.88604	9.97274	9.86649	9.90434	9.87483	9.84627	9.85169	11.0381	9.92533	10.0598	9.88663	7.11619	8.19232	8.15201	7.18367	7.96254	8.43518	7.83215	7.81172		-1.05245	-0.0209706	-0.139634	-0.0455529	2.7018	1.69372	1.82072	2.68282	1.9418	1.43965	2.01412	2.03997		-0.314652	2.04183	2.35648	0.000295297
CCTGGACACTACCACCTTAAT	TRCN0000097200	Crkl	11.2637	11.2142	11.2374	11.104	11.1341	11.2213	11.3192	11.2121	11.185	11.2057	11.1967	11.1881	10.9272	10.8967	11.1722	11.073	8.871	8.04286	7.80548	7.93276	9.50706	10.6454	9.14227	9.90685		0.336528	0.317533	0.0652017	0.0310869	2.26312	3.17844	3.51374	3.27933	1.67792	0.560272	2.05439	1.28129		0.187588	2.22606	2.03848	0.000770355
GCGTTTGGAGAAGGACAGATT	TRCN0000097211	Cryab	9.38442	9.35909	9.47796	9.50772	9.52163	9.2977	9.25142	9.32741	9.4498	9.34033	9.6658	9.88744	8.1898	8.09702	8.4898	7.58446	9.34778	7.22913	8.09287	7.34385	8.53247	9.32444	6.44301	8.21396		1.19462	1.26207	0.988161	1.92326	0.173851	2.06857	1.15855	1.98356	0.917328	0.0158893	3.22279	1.67348		1.34203	1.40175	0.0597262	0.891489
TCACTGTGAATGGACCAAGGA	TRCN0000097212	Cryab	10.3332	10.2096	10.2785	10.0425	10.1961	10.214	10.3606	10.2342	10.1835	10.2696	10.1632	10.2513	10.3579	10.8845	11.359	10.7815	6.64687	8.56995	10.0678	9.90814	9.08188	10.466	8.96322	9.39755		-0.0246876	-0.674852	-1.08044	-0.73903	3.54923	1.64407	0.292812	0.326094	1.1016	-0.196435	1.19995	0.853747		-0.629751	1.09638	1.72613	0.00411209
GCTGGTAATACCAAACCTCAT	TRCN0000097370	Nsun4	10.5767	10.6149	10.6278	10.5711	10.5291	10.5979	10.6301	10.5914	10.6087	10.5994	10.604	10.6388	10.5476	9.89629	9.86409	9.85921	9.27953	9.9661	9.23978	8.16502	7.41715	9.26434	6.62147	6.72278		0.0291257	0.718561	0.763739	0.711881	1.24956	0.631764	1.39033	2.42638	3.19158	1.33502	3.98256	3.91602		0.555827	2.2654	1.70957	0.00739284
GCGGAGATATCGATATAAGAA	TRCN0000097371	Nsun4	12.5508	12.5801	12.5373	12.5202	12.503	12.6034	12.557	12.5676	12.5014	12.5396	12.5026	12.4521	12.4617	12.5958	11.5983	11.4705	11.6041	12.0926	11.2971	11.5798	11.8325	12.3316	11.1884	11.4412		0.0891499	-0.0157044	0.939031	1.04971	0.898861	0.510851	1.25989	0.987857	0.668904	0.207986	1.31421	1.01088		0.515546	0.85743	0.341884	0.324081
GCTGTCAGATGTCCACCTGTA	TRCN0000097457	Mettl22	9.85545	9.82904	9.94892	9.86101	9.9114	9.8143	9.81548	9.80787	9.95348	9.89245	10.0653	10.1539	9.58387	9.4141	9.31274	9.45828	6.84745	7.61878	7.7807	8.13247	10.7672	10.2316	8.4507	9.53529		0.271585	0.414934	0.636178	0.402734	3.06395	2.19552	2.03478	1.6754	-0.813691	-0.339194	1.6146	0.618617		0.431358	1.25625	0.82489	0.12372
CACACCGTTTATTGTACAGAT	TRCN0000097458	Mettl22	10.9046	10.9154	10.885	10.9095	10.8767	10.9492	10.9649	10.9717	10.9169	10.9577	10.8477	10.7596	10.6167	10.4008	10.2384	9.68384	10.0464	9.16481	9.44291	8.24457	9.40519	10.0683	10.4181	10.3857		0.287866	0.51461	0.64666	1.22562	0.830357	1.78438	1.52195	2.72709	1.51173	0.88939	0.429568	0.373875		0.66869	1.25854	0.589853	0.116578
CCGTCTCTTGAGGATACATTT	TRCN0000097656	Mbtd1	10.0938	10.0617	10.0759	10.0974	10.036	10.0443	10.1049	10.0229	10.1057	10.0756	10.1876	10.0861	10.4881	10.854	10.9754	10.6963	8.46887	8.24027	8.20688	8.6558	10.7025	10.45	8.61123	10.7955		-0.394351	-0.792339	-0.899507	-0.598932	1.5671	1.80404	1.89803	1.36713	-0.596821	-0.374303	1.57635	-0.709342		-0.671282	0.816523	1.48781	0.00792704
GAGATCAGATATTACGAAGAA	TRCN0000097658	Mbtd1	10.6169	10.6472	10.6057	10.5966	10.6542	10.627	10.5938	10.6612	10.6029	10.6058	10.6339	10.668	11.4157	11.2512	11.5031	11.4113	8.79713	12.3214	10.1606	10.7238	11.4542	11.1137	8.92514	9.37827		-0.798838	-0.604002	-0.897455	-0.814762	1.8571	-1.69432	0.433125	-0.0626071	-0.851321	-0.507913	1.70873	1.28977		-0.778764	0.27157	1.05033	0.0538858
CCAGATGTACTCTACTACATT	TRCN0000097981	Qrich1	10.7591	10.7875	10.7421	10.755	10.6621	10.8596	10.8612	10.8279	10.7362	10.8239	10.5843	10.6014	10.5814	9.98062	9.36151	9.25834	6.65594	7.67733	8.39044	8.50082	8.73868	9.53439	10.1095	9.03467		0.17764	0.806922	1.38057	1.49661	4.00612	3.18226	2.47071	2.32711	1.99753	1.28953	0.47486	1.56673		0.965437	2.16436	1.19892	0.0363628
CCCAGATGTACTCTACTACAT	TRCN0000097983	Qrich1	11.3742	11.3899	11.3609	11.3138	11.226	11.4161	11.4362	11.4149	11.3424	11.4216	11.2088	11.2007	10.0785	10.2965	9.49779	10.0593	8.81747	7.86536	9.60245	8.89364	8.8764	10.1237	10.5689	11.1857		1.29562	1.09336	1.86314	1.25454	2.40853	3.55071	1.83379	2.52129	2.46599	1.29785	0.639874	0.0149506		1.37667	1.84163	0.464959	0.316251
GAGAACGTGTTCGAGTCTCTA	TRCN0000098773	Mrpl24	10.7807	10.7038	10.8114	10.8664	10.9394	10.664	10.6144	10.6751	10.8434	10.7574	11.1071	11.3522	9.68827	9.30262	8.88701	8.45304	7.8342	6.80662	7.97942	8.59638	7.71062	8.8698	8.324	8.57971		1.09246	1.40116	1.92435	2.41332	3.10517	3.85734	2.63501	2.07874	3.13275	1.88763	2.78311	2.77247		1.70782	2.78153	1.0737	0.0235682
CCGATACATTGGCAGAACCAA	TRCN0000098774	Mrpl24	10.9379	10.8908	10.8908	10.7272	10.8263	10.9068	10.9221	10.8982	10.8635	10.8546	10.8057	10.7782	9.17885	8.60472	9.24338	7.83025	8.93072	8.12028	8.24455	8.05645	8.55519	9.0516	9.15329	9.11788		1.75901	2.28608	1.64742	2.89693	1.89561	2.78656	2.67755	2.84176	2.30831	1.80301	1.65239	1.6603		2.14736	2.20319	0.0558305	0.874903
GCAGATCCTGAAAGCCAAGTT	TRCN0000098852	Mrpl42	9.49806	9.47966	9.5151	9.65814	9.58203	9.38662	9.4734	9.44447	9.60344	9.52264	9.73109	9.87524	8.59664	8.78729	8.15623	7.79966	6.35568	6.5033	4.36786	4.90091	5.80615	6.11617	1.11594	3.25778		0.901425	0.692365	1.35888	1.85848	3.22635	2.88331	5.10555	4.54356	3.79729	3.40647	8.61515	6.61746		1.20279	4.77439	3.57161	0.00106064
CCAGATCTTCTGCATAATAAT	TRCN0000098854	Mrpl42	10.9397	10.9585	10.8932	10.9334	10.916	10.9663	11.0266	11.008	10.8984	10.9859	10.7875	10.6693	9.18185	9.87451	8.66141	8.43458	5.85009	6.61022	5.57617	5.54476	8.65111	9.23613	6.34201	7.50571		1.75786	1.08398	2.23182	2.4988	5.06587	4.35606	5.45045	5.46319	2.24725	1.74975	4.44554	3.16364		1.89311	3.99272	2.09961	0.00557779
GAGTTCTATGTTGGAAGCATA	TRCN0000099001	Mrpl19	10.0985	10.0312	10.1062	10.0848	10.1739	9.96504	9.91854	9.99043	10.1353	10.0346	10.3348	10.5146	9.49357	9.50549	9.81947	9.30046	7.53832	7.29472	8.77741	7.72655	8.42506	8.69139	9.2873	8.11046		0.604883	0.525699	0.286769	0.784298	2.63559	2.67032	1.14113	2.26388	1.71026	1.34322	1.04746	2.40416		0.550412	1.902	1.35159	0.000530436
GAAGCTGCATTGTGGGAAGAA	TRCN0000099004	Mrpl19	11.0336	10.9107	11.016	11.0684	11.1396	10.8321	10.8313	10.8951	11.1393	10.9449	11.4941	11.7177	10.0833	9.59952	9.73586	9.81503	9.936	9.01394	7.80806	8.45769	9.75093	9.39671	10.373	10.4788		0.950225	1.31122	1.28017	1.25339	1.20361	1.81814	3.02328	2.43742	1.3884	1.54816	1.12109	1.23893		1.19875	1.72238	0.52363	0.0710207
GCTTGACAATCAACCGCTTTA	TRCN0000099066	Mrpl16	12.1697	12.2126	12.1543	12.1986	12.2058	12.1604	12.1217	12.1512	12.2255	12.1608	12.259	12.2737	11.3981	11.5232	10.9231	10.858	10.2953	9.94497	10.4131	9.91253	11.5559	11.8136	8.77721	10.4204		0.771601	0.689365	1.23126	1.34063	1.91046	2.21544	1.7086	2.23871	0.669628	0.347162	3.4818	1.85329		1.00821	1.80314	0.794921	0.0647381
CCCTGAAAGGTCCAAGCTTAA	TRCN0000099067	Mrpl16	9.74249	9.61311	9.63201	9.54669	9.6286	9.63218	9.67808	9.6286	9.63089	9.59551	9.66038	9.72463	8.38863	8.34339	8.48896	7.49055	4.03746	5.86176	7.11598	5.98837	6.12079	7.14978	5.9233	5.60406		1.35385	1.26973	1.14305	2.05614	5.59114	3.77042	2.56209	3.64023	3.5101	2.44573	3.73708	4.12057		1.45569	3.67217	2.21648	0.00025918
CCCTACACCAACGGAATCATT	TRCN0000099247	Agpat6	10.0042	10.0001	9.99736	9.9451	9.9031	10.02	10.0612	9.98735	10.0106	10.0101	9.89366	9.83714	11.0459	11.5635	11.3233	11.6619	6.89926	7.01232	11.3154	8.79919	12.239	11.8958	8.99334	10.3414		-1.04173	-1.56345	-1.32595	-1.7168	3.00384	3.00764	-1.25418	1.18816	-2.22844	-1.88562	0.900327	-0.504264		-1.41198	0.278433	1.69041	0.0553522
TCTGGATTACATCCGATTTAA	TRCN0000099253	Fmo9	12.8324	12.7652	12.7321	12.6294	12.706	12.8085	12.8978	12.8488	12.6843	12.7787	12.5883	12.5156	13.843	13.6023	13.0313	13.1237	13.9533	13.5228	13.5046	13.1152	12.4944	12.7324	12.8096	12.4321		-1.01061	-0.837075	-0.2992	-0.494256	-1.24724	-0.714218	-0.606801	-0.26638	0.189905	0.0463611	-0.221213	0.0835607		-0.660284	-0.342003	0.318281	0.211012
CCTGAGATAGATGAGACCATT	TRCN0000099465	Mrp63	10.5041	10.4736	10.4322	10.3627	10.3793	10.4721	10.5574	10.513	10.4383	10.4817	10.3404	10.2941	10.4141	10.5385	10.5732	10.4941	11.0796	9.77584	9.94139	10.5693	10.0518	10.72	9.10625	10.9522		0.0899679	-0.0648988	-0.141	-0.131398	-0.700293	0.696276	0.616022	-0.0562592	0.386492	-0.238328	1.23418	-0.658037		-0.0618324	0.160006	0.221839	0.400311
GCATAGATACATTGCAGACCA	TRCN0000099467	Mrp63	11.4514	11.512	11.4785	11.4673	11.45	11.513	11.5157	11.5173	11.5165	11.5107	11.4526	11.5246	10.6862	11.024	10.5007	10.2843	10.6118	10.3683	7.91258	8.91293	10.3499	10.961	6.98455	9.02737		0.765234	0.488019	0.977815	1.18291	0.838185	1.14476	3.60315	2.60438	1.16667	0.549714	4.46803	2.49728		0.853494	2.10902	1.25553	0.0425098
CGCAAGCACAAATTCTTCTAA	TRCN0000099578	Med1	12.0568	12.011	12.0192	12.0862	12.066	12.0161	11.9667	12.0039	12.0007	11.9953	12.0331	12.0448	13.5716	11.9229	12.4377	12.8609	12.8412	12.5896	13.2705	14.2833	10.3861	10.1397	10.8451	11.3526		-1.51483	0.0881263	-0.418443	-0.774771	-0.77519	-0.573491	-1.30382	-2.27945	1.61463	1.85563	1.18805	0.692227		-0.654979	0.0523235	0.707303	0.286518
GAGAGAGAAGACATACACTTT	TRCN0000099597	Rpp38	11.8445	11.8775	11.8844	11.9472	11.8968	11.9129	11.9083	11.893	11.9113	11.9292	11.9014	11.9342	10.6588	10.4769	11.8869	11.6775	8.28148	9.62145	10.6858	10.5011	12.3045	12.5504	11.4345	11.2034		1.18562	1.4006	-0.00252148	0.269694	3.61536	2.29147	1.22251	1.39192	-0.393185	-0.621268	0.46696	0.730793		0.713348	1.08807	0.374722	0.546011
GCTCATTCCCAACCCTAGTAA	TRCN0000099598	Rpp38	9.96352	9.97324	10.0323	9.98386	9.92814	9.96999	9.98583	9.98941	10.0749	9.99144	10.0941	10.1866	10.0716	10.2927	10.5692	11.0863	8.36676	7.56663	9.80418	9.83586	8.82796	9.3396	10.5389	9.39885		-0.10803	-0.319446	-0.536947	-1.10247	1.56137	2.40336	0.18165	0.153543	1.24696	0.651835	-0.444818	0.787793		-0.516723	0.817712	1.33443	0.00602918
GCCTCTTTACAGTACACTAAT	TRCN0000099640	Wasl	10.354	10.4453	10.464	10.4582	10.3531	10.3906	10.4102	10.4405	10.4171	10.411	10.4414	10.5036	9.51391	9.49278	10.4356	10.8673	9.20995	9.86895	9.07582	10.3703	8.06108	9.30753	9.04245	8.64864		0.840067	0.952467	0.0283144	-0.409192	1.14313	0.521628	1.33437	0.070209	2.356	1.1035	1.39896	1.85497		0.352914	1.22285	0.869933	0.075411
AGATTAACCAAGGCAGATATT	TRCN0000099643	Wasl	10.1807	10.2711	10.2314	10.2713	10.2331	10.2727	10.2324	10.2831	10.1903	10.2678	10.2045	10.1862	7.73285	7.48972	9.47411	7.24931	3.53341	5.2623	8.55095	8.72473	7.2174	7.94898	8.33373	9.14094		2.4479	2.78141	0.757261	3.02199	6.69968	5.01043	1.68148	1.55838	2.97294	2.31881	1.87072	1.04524		2.25214	2.89471	0.642572	0.473835
GCACACACAGATGAAGCTCTT	TRCN0000099812	Bcap29	11.0628	11.1217	11.1486	11.12	11.095	11.1309	11.1207	11.1363	11.1539	11.124	11.174	11.1677	10.1733	10.1633	11.0586	10.914	7.23385	8.94242	7.65146	9.30422	8.81898	8.19187	8.46341	9.23067		0.889451	0.958429	0.089939	0.20596	3.8611	2.18845	3.46927	1.83209	2.33492	2.93215	2.71059	1.93703		0.535945	2.6582	2.12226	0.000144557
TCAGAACTTCAGAACCGTTTA	TRCN0000099813	Bcap29	10.3139	10.2157	10.2519	10.1754	10.256	10.2836	10.2329	10.2506	10.1812	10.2604	10.1535	10.0896	10.3085	10.4642	10.3574	10.2972	7.61469	9.62517	8.07796	8.13521	9.70209	9.81399	9.33994	8.94339		0.00545927	-0.248434	-0.105463	-0.121764	2.64128	0.658395	2.15495	2.1154	0.479107	0.446383	0.813603	1.14617		-0.11755	1.30691	1.42446	0.00221311
GCCTCTGATGGATTCTGCATT	TRCN0000100176	Ly6c1	10.0406	10.0886	10.1059	10.147	10.1102	9.97317	9.9793	10.0088	10.1494	10.0762	10.3362	10.4672	10.452	10.4933	10.3329	9.83025	6.74923	7.18369	7.14692	7.56726	8.82572	9.17507	6.88224	9.25538		-0.411434	-0.404721	-0.22693	0.316706	3.36097	2.78948	2.83238	2.44154	1.32373	0.901166	3.45395	1.21183		-0.181595	2.28938	2.47098	0.000121248
GAATTGATTGAGGACTCTCAA	TRCN0000100177	Ly6c1	12.3444	12.3376	12.374	12.3578	12.347	12.3387	12.3404	12.3536	12.4013	12.361	12.4455	12.5573	11.0973	11.0328	10.6363	10.8383	9.66681	9.40649	10.083	10.332	11.0625	11.4385	10.7084	12.7819		1.24707	1.30479	1.73769	1.51955	2.68022	2.93219	2.25734	2.02163	1.33882	0.922558	1.73709	-0.224639		1.45227	1.70815	0.255877	0.517825
GCTTTCTAATTCCACACAGAT	TRCN0000100790	Sar1b	10.59	10.6088	10.6407	10.6209	10.6139	10.5751	10.573	10.6149	10.6002	10.6121	10.6421	10.6238	8.56411	8.59429	8.66366	7.90687	7.04668	7.45869	7.14692	4.78005	7.63243	7.73158	8.08502	8.55103		2.0259	2.01447	1.97709	2.71402	3.56727	3.11637	3.42605	5.83484	2.96775	2.88049	2.55712	2.07275		2.18287	3.30283	1.11996	0.029775
TGCAGTTTCTAGGATTGTATA	TRCN0000100794	Sar1b	7.92139	7.92364	7.99216	7.95865	7.93965	7.96929	8.00637	7.94912	7.96445	7.95171	7.97604	7.97326	6.05804	6.93212	6.608	5.77471	1.33702	5.34719	5.66435	5.17037	5.52604	7.12826	5.78432	6.45474		1.86335	0.99152	1.38416	2.18394	6.60264	2.6221	2.34202	2.77875	2.4384	0.823441	2.19172	1.51852		1.60574	2.6647	1.05896	0.143138
GCTGCTTGTAAGTCCACATAT	TRCN0000100845	Ap4b1	0	0	0	0	0	0	0	0	0	0	0	0	0	0	0	0	0	0	0	0	0	0	0	0		0	0	0	0	0	0	0	0	0	0	0	0		0	0	0	#DIV/0!
CCAAGACTTACACAGATCAAT	TRCN0000100849	Ap4b1	11.3669	11.3871	11.3483	11.3536	11.2937	11.4669	11.4474	11.4111	11.3351	11.4184	11.1907	11.1332	10.8008	11.4154	10.9417	10.9282	10.3592	10.4331	9.38828	9.7455	10.432	12.7885	11.5524	11.9701		0.566086	-0.0283046	0.40659	0.425372	0.934527	1.03374	2.05912	1.66561	0.903137	-1.37016	-0.36164	-0.836914		0.342436	0.503427	0.160991	0.73006
GAAAGCTACATCAGCACAATT	TRCN0000100862	Rab1	12.503	12.4448	12.5178	12.5906	12.597	12.4131	12.4084	12.4846	12.5828	12.4941	12.769	12.837	13.2079	12.8093	12.747	12.496	12.7506	13.0594	13.7801	13.5548	13.044	13.9885	12.6347	14.0235		-0.7049	-0.364498	-0.229207	0.0946489	-0.153588	-0.646277	-1.37166	-1.07024	-0.461105	-1.49448	0.134307	-1.18651		-0.300989	-0.781193	-0.480205	0.103335
CGTCACAGAAAGTATAGTGAA	TRCN0000101247	Nktr	10.6378	10.6525	10.5972	10.6062	10.6183	10.6679	10.6444	10.647	10.5937	10.6109	10.5726	10.4999	10.6918	10.776	11.6015	10.8348	10.2123	11.2333	11.2809	9.71743	10.4548	10.5627	9.0314	9.75644		-0.0540237	-0.123464	-1.00433	-0.22858	0.406067	-0.565439	-0.636558	0.929518	0.138804	0.0481189	1.54121	0.743479		-0.352598	0.325649	0.678248	0.0776046
GCCAGTTAAGACAGAACCTTT	TRCN0000101248	Nktr	10.4096	10.4501	10.3923	10.4758	10.4002	10.4201	10.3689	10.4256	10.4595	10.3809	10.4709	10.5148	10.3983	10.0551	10.0444	9.93106	9.34964	9.12178	8.11598	8.49336	7.69105	9.08238	6.74322	7.9416		0.0112806	0.395017	0.347973	0.544704	1.05056	1.2983	2.25287	1.93224	2.76842	1.29856	3.72768	2.57321		0.324743	2.11273	1.78799	0.000619235
CTCCACAATAACCAACATCAT	TRCN0000101286	Ifi27l2b	12.0727	12.0453	11.982	11.9592	11.9587	12.0655	12.0669	12.0523	11.9709	12.0217	11.8467	11.7541	10.8805	10.7431	11.4714	11.3971	8.05126	9.08286	8.46599	10.0419	9.52097	9.71523	8.15251	9.15749		1.19221	1.30219	0.510606	0.562123	3.90743	2.98259	3.60091	2.0104	2.44992	2.30644	3.69416	2.59656		0.891784	2.94355	2.05177	0.000111296
CTCCACATCAACCAATATCAT	TRCN0000101289	Ifi27l2b	10.6159	10.6375	10.6055	10.6194	10.5678	10.6464	10.6603	10.6024	10.5788	10.6515	10.4845	10.501	8.79674	9.13218	9.34201	8.54074	6.42801	7.6997	9.26679	9.10548	7.58553	6.50548	6.19733	5.75847		1.81916	1.50535	1.26346	2.07868	4.13979	2.94669	1.39346	1.49693	2.99324	4.14598	4.28719	4.74255		1.66666	3.26823	1.60157	0.0097788
GCCCTACTGATGAATTATCTT	TRCN0000101668	Nsf	11.544	11.5983	11.5577	11.6127	11.5562	11.6285	11.564	11.5539	11.5507	11.5487	11.5891	11.5541	6.89975	6.95602	7.625	8.74398	4.07398	4.91834	6.00328	9.56624	5.82422	7.05414	7.4145	8.29845		4.64422	4.64225	3.9327	2.86872	7.48219	6.71015	5.5607	1.98766	5.72643	4.49453	4.17462	3.25568		4.02197	4.92399	0.902022	0.265706
GCCAGAAATCCTTAACAAGTA	TRCN0000101669	Nsf	10.5477	10.5764	10.5776	10.5148	10.4805	10.5484	10.5964	10.5634	10.5419	10.556	10.5264	10.5755	5.71642	4.95898	4.92993	6.67488	1.45249	2.38783	4.94814	4.04775	3.46592	6.28987	4.37468	6.02512		4.83126	5.61746	5.64763	3.83993	9.02799	8.16052	5.64821	6.51562	7.07601	4.26612	6.1517	4.55039		4.98407	6.42457	1.4405	0.0743939
CCACTTATCCACACTGAAGTT	TRCN0000101729	Atp13a5	12.5574	12.5766	12.578	12.5304	12.49	12.6041	12.6217	12.5962	12.5712	12.6073	12.4777	12.4404	12.5016	12.6058	13.1089	12.9871	12.6137	12.7958	13.4835	13.0934	15.9925	12.6436	12.4252	14.6452		0.0558058	-0.029257	-0.53083	-0.456724	-0.1237	-0.191674	-0.861845	-0.49714	-3.42135	-0.0362438	0.0525507	-2.20479		-0.240251	-0.910525	-0.670273	0.187288
ACTACTATGTATGGCGTGATA	TRCN0000102107	Tspo	10.9626	10.9392	10.9099	10.9138	10.895	10.9895	11.0269	10.9794	10.9016	10.9508	10.8026	10.8156	10.2083	10.4948	9.61884	10.4359	7.19707	8.36765	8.76417	8.55401	8.96186	10.4681	8.62487	10.1318		0.754346	0.444382	1.29101	0.47793	3.69797	2.62181	2.26273	2.42543	1.9397	0.482609	2.17774	0.68381		0.741917	2.03647	1.29456	0.0115148
TGGCTCCTACATAGTCTGGAA	TRCN0000102108	Tspo	9.18411	9.0557	9.18944	9.1272	9.24605	8.85463	8.8961	8.95964	9.22009	8.96119	9.59078	10.0062	10.5803	10.0485	10.7129	10.6952	7.64232	8.53531	9.1817	8.88797	9.96186	10.8108	9.0718	10.2657		-1.39617	-0.992827	-1.52348	-1.56803	1.60374	0.319319	-0.285597	0.0716752	-0.74177	-1.84962	0.518979	-0.259521		-1.37013	-0.0778496	1.29228	0.00802267
GAGCATAAACAGAGGCGGCAT	TRCN0000102312	Alyref	11.4672	11.1696	11.4388	11.4091	11.6193	11.1562	11.1057	11.255	11.3837	11.2651	11.7792	12.1025	12.5375	12.2406	12.808	12.6337	12.7449	13.2496	13.5087	13.6237	12.3624	12.1296	11.873	11.897		-1.07033	-1.07098	-1.3692	-1.22462	-1.12567	-2.09334	-2.40306	-2.36862	-0.978644	-0.864512	-0.0937464	0.205485		-1.18379	-1.21526	-0.0314772	0.932622
CCAAGGCTTACACAGAAAGTA	TRCN0000102390	Iars2	12.3677	12.3737	12.3662	12.3454	12.3055	12.4043	12.412	12.4068	12.3827	12.4245	12.3184	12.3049	11.2705	11.3276	11.0773	10.787	8.92511	8.30801	8.78005	8.32237	10.6812	11.6694	12.5612	11.5667		1.0972	1.04611	1.28892	1.55847	3.3804	4.09628	3.63194	4.08445	1.70149	0.75504	-0.242758	0.738194		1.24768	2.26813	1.02045	0.142736
CCGATAAAGTGTCTCCTCTTT	TRCN0000102394	Iars2	11.2262	11.1664	11.1243	11.0399	11.0788	11.1761	11.2261	11.1653	11.0927	11.17	11.0378	10.9701	11.0357	11.2557	12.0221	11.675	10.8519	9.62888	10.7415	10.2787	10.4395	10.9679	9.72907	10.6088		0.1905	-0.0892599	-0.897834	-0.635084	0.22689	1.54722	0.484545	0.886517	0.653151	0.202072	1.30877	0.361293		-0.357919	0.708807	1.06673	0.0124198
GCAGAAATCATCGTCAAGATT	TRCN0000102600	Puf60	14.0994	14.113	14.0918	14.1517	14.1135	14.1103	14.084	14.1032	14.0921	14.1131	14.0823	14.0683	14.2739	14.1424	14.1946	14.2006	15.2758	15.3023	14.3694	14.1514	14.5239	14.5795	17.1023	15.5117		-0.174529	-0.0294348	-0.102837	-0.0489768	-1.16237	-1.19197	-0.285453	-0.0482565	-0.431845	-0.466351	-3.01997	-1.44334		-0.0889445	-1.0062	-0.917251	0.0297456
GCTGAACAACAATGACGGAAA	TRCN0000102971	Chrnb1	10.1857	10.2711	10.2429	10.2108	10.2515	10.2321	10.2276	10.1982	10.2252	10.218	10.2294	10.139	10.0921	9.50194	9.8053	9.27474	8.76398	9.50215	10.4312	9.56878	8.60308	10.0369	7.84386	9.80746		0.0935339	0.769185	0.437593	0.936046	1.48749	0.729938	-0.203577	0.62945	1.62214	0.181093	2.38553	0.331573		0.559089	0.895455	0.336366	0.369838
CTGAACCACATCACTCTCTTT	TRCN0000102974	Chrnb1	9.93342	9.8896	9.95827	9.94393	9.97175	9.89425	9.83983	9.87504	9.94757	9.9066	9.9995	9.96525	9.88114	10.5662	10.0818	9.8453	8.05241	7.2623	9.50313	9.29015	8.73947	8.99064	9.3254	9.10887		0.0522824	-0.676581	-0.123507	0.0986306	1.91935	2.63195	0.336703	0.584886	1.2081	0.915956	0.674108	0.856385		-0.162294	1.14093	1.30322	0.00247561
GCCTCAAGAGTGACTTTGAAT	TRCN0000103546	Grhl3	9.33223	9.45595	9.37497	9.39662	9.39266	9.2898	9.27665	9.32524	9.4291	9.32376	9.42524	9.56141	8.63283	8.54689	8.62577	8.57726	7.17412	7.9543	7.0345	7.00644	9.71627	9.4002	9.02626	9.2409		0.699408	0.909059	0.749202	0.819358	2.21854	1.3355	2.24215	2.3188	-0.287171	-0.0764426	0.39898	0.320515		0.794257	1.05886	0.264602	0.520807
CGACTACTATATGGGTCCCAA	TRCN0000103547	Grhl3	9.87957	9.7942	9.8544	9.81408	9.7841	9.7655	9.79201	9.85111	9.86322	9.89411	9.92303	10.0725	11.0655	10.4421	10.1147	9.93247	7.93196	10.8956	11.2019	10.2679	10.6522	9.80799	9.2282	10.9423		-1.18591	-0.647934	-0.260303	-0.118393	1.85214	-1.13012	-1.40984	-0.41674	-0.788951	0.0861148	0.694837	-0.869834		-0.553136	-0.2478	0.305336	0.514667
GCATTGTTCATTGTAGCACTA	TRCN0000103580	Cnot2	10.4729	10.595	10.5662	10.5834	10.4903	10.5484	10.5511	10.5301	10.5704	10.5604	10.5333	10.474	11.9092	12.1953	11.1945	11.5438	10.2514	10.412	9.93727	8.93197	10.5592	12.0122	9.87987	10.5577		-1.43627	-1.6003	-0.628273	-0.960429	0.238859	0.136307	0.61384	1.59811	0.0111472	-1.4518	0.653454	-0.0836677		-1.15632	0.214531	1.37085	0.0046248
CGGCAACCCAACTCCATTAAT	TRCN0000103584	Cnot2	9.4014	9.31204	9.49137	9.47307	9.59914	9.11499	9.16295	9.25973	9.4081	9.25653	9.95588	10.0775	11.1991	11.9817	10.723	11.7781	7.8684	7.74928	9.54167	8.41322	8.06994	9.15037	6.64844	6.63393		-1.79767	-2.66967	-1.23163	-2.30505	1.73074	1.36571	-0.378715	0.846504	1.33816	0.106156	3.30744	3.44354		-2.001	1.46994	3.47095	0.000125686
GCCATTGAGCTTCCAATAGAT	TRCN0000103641	Hnrnpab	12.6567	12.7002	12.7057	12.7636	12.6866	12.6749	12.6525	12.6365	12.7533	12.6778	12.8188	12.8211	12.5861	12.2869	12.5108	12.7452	12.2379	12.2865	12.4448	12.3133	10.6416	11.3449	8.59399	10.2863		0.0706427	0.413289	0.194861	0.0183942	0.448677	0.388368	0.207688	0.323241	2.11175	1.33286	4.22484	2.53479		0.174297	1.44653	1.27223	0.04019
GCTGTGATTCTCCACTGAAAT	TRCN0000103750	Ddx3x	10.784	10.7519	10.8152	10.8015	10.7794	10.6929	10.7857	10.6988	10.7744	10.7856	10.8611	10.7734	10.9386	11.2429	10.1029	10.1829	6.17832	6.99269	7.83996	8.21638	10.5184	10.6215	9.57186	10.7762		-0.154643	-0.490928	0.712338	0.618538	4.6011	3.70022	2.94571	2.48239	0.255955	0.164186	1.28927	-0.00271616		0.171326	1.92952	1.75819	0.0299727
ACGTTCTAAGAGCAGTCGATT	TRCN0000103754	Ddx3x	11.46	11.4008	11.455	11.4233	11.4759	11.38	11.3774	11.4117	11.4417	11.3601	11.4969	11.5613	12.6907	12.7055	12.1423	12.5908	12.714	11.7001	11.9159	12.0889	11.2985	11.5399	10.9189	10.8233		-1.23077	-1.30472	-0.687317	-1.16755	-1.23809	-0.320089	-0.53854	-0.677132	0.143145	-0.179883	0.577957	0.738054		-1.09759	-0.186823	0.910765	0.00736795
GATCTATGACATATTCCAGAA	TRCN0000104076	Eif4a1	10.9985	11.0271	11.0072	11.0419	10.9709	11.0758	11.0608	11.0819	11.0545	11.0714	11.0045	11.0236	10.3763	10.4683	9.01798	9.66755	9.4403	7.18369	7.44788	8.1757	8.76931	9.85423	9.10625	8.58431		0.62219	0.558735	1.98923	1.37438	1.53063	3.89214	3.61291	2.90623	2.28523	1.21719	1.89826	2.4393		1.13613	2.47274	1.3366	0.0223631
GCGAGCTATTCTTCCTTGTAT	TRCN0000104077	Eif4a1	9.9011	9.86403	9.9526	10.006	9.94914	9.86682	9.83606	9.90585	9.99554	9.89279	10.1141	10.2372	9.96145	10.116	10.7241	10.9432	9.195	7.83629	9.63045	8.40075	8.25341	8.22941	8.44558	9.23701		-0.0603457	-0.252007	-0.771477	-0.937209	0.754139	2.03053	0.205612	1.5051	1.74213	1.66338	1.66849	1.00017		-0.50526	1.3212	1.82646	0.000214037
CGTAGAGCTTTATGCAGAGAA	TRCN0000104305	Rps3	10.1083	10.0911	10.1451	10.1597	10.0937	10.0873	10.1091	10.1752	10.2107	10.1776	10.0786	10.1057	-2.317	3.02824	3.85854	-0.0665916	-1.24795	-1.7821	0.266318	0.900908	-1.08867	-1.09815	-1.69141	4.56117		12.4253	7.06283	6.28653	10.2263	11.3416	11.8694	9.84275	9.27432	11.2994	11.2758	11.77	5.5445		9.00025	10.2772	1.27697	0.465549
CAACCAGGACAGAAATCATTA	TRCN0000104309	Rps3	7.62981	7.53331	7.52638	7.58414	7.50395	7.64595	7.58349	7.6286	7.68556	7.65556	7.60826	7.52338	0	0	-1.24998	-1.65155	0	0	1.48871	-1.90645	-2.08867	3.92422	0	0		7.62981	7.53331	8.77636	9.23569	7.50395	7.64595	6.09478	9.53504	9.77422	3.73134	7.60826	7.52338		8.29379	7.42711	-0.866677	0.301718
CCCACTTGTTAAGACAGTGTT	TRCN0000104365	Mrpl39	10.6554	10.635	10.6472	10.6145	10.5757	10.6972	10.6995	10.7023	10.6062	10.6885	10.5539	10.5248	9.677	9.91317	9.65164	9.55912	8.02934	7.48469	8.85503	8.47726	10.2177	11.8813	7.4885	9.3502		0.978374	0.721792	0.995523	1.05542	2.5464	3.21249	1.84446	2.22508	0.388491	-1.1928	3.06545	1.17463		0.937777	1.65803	0.720248	0.215982
GCGCTGGAAATATTTCAACAT	TRCN0000104369	Mrpl39	11.0236	10.9809	10.9938	11.0445	11.0811	10.9519	10.8955	10.9156	11.0207	10.9316	11.16	11.2078	10.1329	10.1426	9.9321	9.6816	7.02818	8.6722	9.41395	8.62201	10.4592	12.422	9.06431	9.01494		0.890724	0.838257	1.06168	1.36288	4.05289	2.27967	1.48155	2.29361	0.561546	-1.49046	2.09566	2.1929		1.03839	1.68342	0.645037	0.301144
CCAGCATTCATTGTCAACTTA	TRCN0000104461	Mrpl20	12.9132	12.9465	12.9271	12.9232	12.8814	12.9835	12.9638	12.9671	12.8947	12.9552	12.8133	12.7087	12.6509	12.6883	12.7002	12.7509	11.9521	12.3707	11.3454	11.5557	12.434	12.5758	10.9786	11.2909		0.262205	0.25818	0.226842	0.172323	0.929267	0.612739	1.61842	1.41143	0.460719	0.379366	1.83476	1.4178		0.229887	1.08306	0.853175	0.00346923
CCCAGCATTCATTGTCAACTT	TRCN0000104462	Mrpl20	11.6982	11.6317	11.6402	11.6301	11.6233	11.6723	11.7077	11.653	11.6022	11.6578	11.532	11.4547	11.5815	10.4712	10.6913	10.2414	8.70115	9.37399	9.19508	8.97314	9.88467	11.1631	6.43787	8.30867		0.116725	1.1605	0.948977	1.38874	2.92214	2.29835	2.51259	2.67988	1.71748	0.494729	5.09409	3.14601		0.903734	2.60816	1.70443	0.0101482
CGACACCATTCAGATTGATTT	TRCN0000104500	Rps4x	10.9254	10.9327	10.8904	10.9787	10.9678	10.8702	10.8794	10.9225	10.9335	10.8921	10.9995	10.9022	4.51589	2.83559	3.24187	3.96316	2.21149	-0.782098	2.53934	3.18102	5.11101	4.89054	3.70091	1.79065		6.40952	8.09713	7.64857	7.01558	8.75629	11.6523	8.34008	7.74144	5.82248	6.00159	7.2986	9.11154		7.2927	8.09054	0.797844	0.317227
GCTTTGCTGTTCATCGTATTA	TRCN0000104504	Rps4x	11.228	11.2799	11.2429	11.3286	11.299	11.2303	11.1665	11.2036	11.2957	11.2384	11.3314	11.2772	1.14243	3.64295	1.65691	1.67037	0.559409	2.91834	0.48871	0.0935527	-0.503704	5.4017	0.630516	0.288154		10.0856	7.63697	9.58598	9.65825	10.7396	8.31198	10.6777	11.11	11.7994	5.83674	10.7008	10.989		9.24169	10.0207	0.778983	0.399869
CGACTCCATGTGGACTTATTT	TRCN0000104592	Gca	13.634	13.4642	13.5775	13.6115	13.6356	13.4183	13.4766	13.4409	13.6098	13.5326	13.8095	13.5975	12.3072	12.3826	12.3663	12.4918	10.9545	10.8194	10.6957	12.275	11.5819	11.8555	10.7497	11.7079		1.32688	1.08162	1.21111	1.11971	2.68108	2.5989	2.78088	1.16589	2.02794	1.67714	3.05975	1.88951		1.18483	2.23514	1.05031	0.00224776
GACGACTCCATGTGGACTTAT	TRCN0000104593	Gca	8.88816	8.86354	8.93105	8.97398	9.00101	8.77037	8.71649	8.76129	9.01573	8.80421	9.45009	9.67672	10.4568	9.85001	9.50324	9.30917	8.00354	7.31593	7.80935	7.34385	8.31966	9.05604	8.34339	8.79264		-1.5686	-0.986473	-0.572191	-0.335192	0.997472	1.45444	0.907145	1.41744	0.696071	-0.251831	1.1067	0.884082		-0.865613	0.90144	1.76705	0.00170193
CCCTTACTGGACACACAAGAA	TRCN0000105002	Cln8	11.4697	11.4909	11.5201	11.4327	11.3901	11.5141	11.5045	11.4801	11.4948	11.5144	11.47	11.4779	10.3548	10.6517	11.127	10.528	9.04495	11.5629	10.8045	11.2691	9.9988	9.91413	8.91684	9.29705		1.11498	0.839234	0.393114	0.904674	2.34515	-0.0487588	0.699989	0.211029	1.49596	1.60027	2.55315	2.1809		0.813	1.37971	0.566712	0.171644
CACCACCTCTTTGCCTTTCTT	TRCN0000105004	Cln8	10.5674	10.5219	10.5511	10.5385	10.5534	10.4793	10.4933	10.5025	10.5476	10.5324	10.6031	10.6629	9.11711	9.2962	8.542	8.11497	5.89671	6.48937	5.91017	6.89768	7.16872	7.59882	7.52776	8.96117		1.45032	1.22574	2.00909	2.42349	4.65672	3.98997	4.5831	3.60482	3.37891	2.93361	3.07533	1.70176		1.77716	3.49053	1.71337	0.00300791
GTCACTTTCTTTCAAGACCAA	TRCN0000105763	Stac	13.0777	13.0462	13.099	13.106	13.1128	13.0228	13.0563	13.034	13.1219	13.0831	13.1969	13.2123	13.3406	13.0182	13.7377	13.3736	13.6707	13.4628	13.2062	13.2962	12.6695	12.8897	12.1048	13.3614		-0.262943	0.0280148	-0.638735	-0.267537	-0.557899	-0.440008	-0.149828	-0.262205	0.452405	0.193387	1.09203	-0.1491		-0.2853	0.0223476	0.307648	0.220041
GCACCCATTCACGCCTTGGAA	TRCN0000106105	Sipa1l1	10.0411	9.92877	10.0866	10.0609	10.0722	9.88341	9.9123	9.90658	10.1165	9.96591	10.3506	10.5086	9.87221	9.98244	9.84146	9.90351	9.53546	10.1887	9.32341	10.102	11.0539	12.758	8.96591	8.99609		0.168941	-0.0536646	0.245117	0.15739	0.536702	-0.305314	0.588888	-0.195401	-0.937416	-2.79208	1.38466	1.51249		0.129446	-0.0259332	-0.155379	0.763689
CGCCACTAGCAAATATCTGAT	TRCN0000106109	Sipa1l1	10.1916	10.0798	10.1188	10.2482	10.2996	10.0573	9.97588	10.0752	10.1374	10.0783	10.411	10.5755	11.2128	10.9547	10.2077	10.1821	9.45769	8.84726	9.41013	9.29445	11.0676	11.6271	8.17587	11.3918		-1.02122	-0.874924	-0.0888527	0.0660278	0.841893	1.21007	0.565755	0.780723	-0.930128	-1.54885	2.23518	-0.816264		-0.479741	0.292298	0.77204	0.173685
GCAAGATGTGTATGTCCATTT	TRCN0000106402	Rnf125	11.5146	11.6056	11.5885	11.6216	11.5301	11.5974	11.5989	11.5787	11.6149	11.6046	11.5932	11.638	10.9572	10.7877	10.8592	10.5609	8.14007	8.90615	10.1647	9.25531	10.6902	10.2553	10.7848	12.0615		0.557356	0.817851	0.729266	1.06067	3.39004	2.69125	1.43419	2.32339	0.924705	1.34934	0.808326	-0.423457		0.791286	1.56222	0.770937	0.118033
AGTACCTTCAATGGCAGTTTA	TRCN0000106404	Rnf125	10.0618	10.0316	10.1152	10.1357	10.1087	10.0183	10.1012	10.0976	10.1581	10.0695	10.1885	10.2624	8.79479	9.27735	10.0461	9.96224	7.60224	8.10512	7.33778	6.66341	8.10116	8.45548	8.7924	7.76118		1.26703	0.754271	0.0691497	0.173513	2.50647	1.91313	2.76347	3.43418	2.05693	1.61404	1.39612	2.50127		0.56599	2.2732	1.70721	0.00204897
GACGGAAATTGGTAATATGAT	TRCN0000108720	Ipp	10.5047	10.4407	10.4611	10.4461	10.472	10.4659	10.4883	10.4638	10.449	10.4241	10.4574	10.4651	9.82447	9.78521	10.7518	9.7027	8.8514	9.31462	10.9913	10.4087	8.0419	7.88769	8.69661	9.79859		0.680227	0.655476	-0.290638	0.743415	1.6206	1.15126	-0.502974	0.0551274	2.40713	2.53642	1.7608	0.666545		0.44712	1.21186	0.764743	0.124364
GCTGTGAGATGCAAGGTTTAA	TRCN0000108724	Ipp	10.5927	10.659	10.6207	10.6546	10.6632	10.6337	10.6424	10.6474	10.6414	10.6123	10.659	10.5966	10.5232	10.5732	12.2694	12.7536	6.52684	10.1567	7.91258	8.05934	7.82273	9.20905	5.97392	6.788		0.0695541	0.0858136	-1.64872	-2.09901	4.1364	0.476992	2.72981	2.58805	2.81869	1.40321	4.68509	3.80857		-0.898091	2.83085	3.72894	0.00142642
GCCCTAATCCAGAATCTTGTA	TRCN0000108782	Diap2	9.45419	9.43053	9.47331	9.45296	9.38898	9.40136	9.4249	9.44747	9.51926	9.43141	9.45061	9.63695	9.10138	8.95157	9.51199	9.56094	7.44554	8.22913	8.57693	8.66246	7.24449	7.96255	6.2511	8.00011		0.352808	0.478965	-0.0386775	-0.107977	1.94344	1.17223	0.847968	0.785007	2.27477	1.46886	3.19951	1.63684		0.171279	1.66608	1.4948	0.000960832
GATGGAAGATATGAACCTTAA	TRCN0000108784	Diap2	10.3911	10.4762	10.4386	10.4026	10.3969	10.4689	10.4881	10.4878	10.4389	10.4291	10.3035	10.3442	8.92558	9.73344	9.08429	9.08061	8.53751	6.22913	7.06073	6.51982	9.07373	8.92283	8.25549	8.32158		1.46557	0.742721	1.35435	1.32197	1.85944	4.23975	3.42735	3.96797	1.36519	1.5063	2.048	2.0226		1.22115	2.55457	1.33342	0.0136754
TGGCATTAACACCACGGACAT	TRCN0000108867	Tagln2	10.4283	10.2407	10.3258	10.3803	10.4568	10.1627	10.1285	10.2182	10.3126	10.1871	10.5454	10.7803	8.65956	7.75616	9.20175	8.40508	7.04207	7.27047	6.63555	6.54888	8.91415	8.30912	6.29727	8.63688		1.76869	2.48454	1.12401	1.97523	3.41475	2.89226	3.4929	3.66936	1.39841	1.87797	4.24812	2.14343		1.83812	2.89215	1.05403	0.0421172
GAACGTGATTGGGTTGCAGAT	TRCN0000108868	Tagln2	9.87734	9.80489	9.96525	9.98234	10.0524	9.77442	9.72637	9.80008	9.97876	9.84986	10.1683	10.4227	9.43245	8.72955	9.58804	8.06783	6.50025	6.69768	6.89324	6.30301	8.72752	8.48775	6.42753	8.61083		0.44489	1.07534	0.377203	1.91451	3.55213	3.07674	2.83312	3.49708	1.25124	1.3621	3.74075	1.81185		0.952986	2.64063	1.68764	0.00961362
GCTGTATGAACAAGTGAATAT	TRCN0000109121	Snrpe	11.2747	11.3991	11.3194	11.3571	11.2455	11.3945	11.3728	11.4114	11.3241	11.3716	11.2562	11.1131	1.683	5.08352	4.14234	5.29096	3.50694	4.14864	0.681355	1.79399	5.75682	8.9551	3.26278	3.40363		9.5917	6.3156	7.17708	6.06616	7.73855	7.24589	10.6914	9.61737	5.5673	2.41651	7.99338	7.70943		7.28763	7.37248	0.084846	0.9452
TGCGGATAGAAGGTTGTATTA	TRCN0000109122	Snrpe	10.2213	10.1653	10.172	10.1517	10.2324	10.135	10.121	10.1429	10.1625	10.1486	10.2162	10.2881	4.90217	5.01692	6.27358	5.67037	8.12926	4.87611	-0.733682	2.09355	9.07938	6.14026	5.95964	5.72556		5.31917	5.14834	3.89845	4.4813	2.10315	5.25885	10.8547	8.0494	1.08313	4.00833	4.25657	4.56258		4.71181	5.02209	0.310272	0.795367
GCAAGATCCGATTTCTGATTT	TRCN0000109191	Snrpd3	10.6296	10.7248	10.6819	10.724	10.7119	10.6942	10.6234	10.6802	10.7147	10.7151	10.7291	10.7576	6.78629	4.25706	6.20535	4.6883	2.79645	3.07588	8.42451	2.55298	1.23326	5.36946	6.30294	4.00697		3.84334	6.46778	4.47651	6.03571	7.91544	7.61831	2.19888	8.12724	9.48141	5.34562	4.42621	6.75064		5.20583	6.48297	1.27713	0.248755
GCACAGCTGGAACAGGTATAT	TRCN0000109194	Snrpd3	9.88721	9.94221	10.0022	10.0759	9.95164	9.9851	9.983	9.9203	10.0645	10.0241	10.037	10.0201	0.852924	-1.97176	3.53138	3.706	1.21149	-0.197135	0.00328327	0	-2.08867	-0.0981473	0	0.0251198		9.03429	11.914	6.47083	6.3699	8.74015	10.1822	9.97971	9.9203	12.1532	10.1222	10.037	9.99501		8.44725	10.1412	1.69398	0.28936
GCTAACATGAAGAAACTTCAA	TRCN0000109946	Ppfia3	11.3179	11.4105	11.3607	11.3581	11.3336	11.4519	11.4258	11.4397	11.3848	11.4014	11.3019	11.1648	10.233	10.6909	11.63	11.8172	8.46114	8.77824	9.5701	9.63996	8.48876	9.09661	6.63951	7.47798		1.08492	0.719594	-0.269303	-0.459057	2.87249	2.67368	1.85574	1.79975	2.89604	2.30481	4.66239	3.68681		0.269039	2.84396	2.57492	0.00105527
CGGTTACAGCTTCACCTCAAA	TRCN0000109948	Ppfia3	10.3965	10.2207	10.3457	10.3524	10.4578	10.1897	10.1836	10.2264	10.3271	10.2817	10.5018	10.5815	10.8008	10.5181	11.1099	10.9193	8.72503	8.26093	7.95748	9.94139	9.67289	9.82072	7.54699	8.10194		-0.404299	-0.297399	-0.764163	-0.566818	1.73277	1.92873	2.22613	0.28501	0.654251	0.461016	2.95482	2.47952		-0.50817	1.59028	2.09845	0.000446945
GAGCTTTACATTCCCAACAAT	TRCN0000110097	Cyth2	11.9444	11.8258	11.9138	11.9918	12.0907	11.7592	11.6777	11.7721	11.9325	11.7751	12.2809	12.6166	11.7515	11.5893	11.4345	11.1939	12.181	11.786	11.8501	11.437	12.0509	11.3942	9.76083	11.1144		0.192914	0.236501	0.479259	0.797853	-0.0902622	-0.0267999	-0.172381	0.335069	-0.118422	0.380897	2.52008	1.50221		0.426632	0.541298	0.114667	0.763543
GAGAAAGATGAGTGGATCAAA	TRCN0000110099	Cyth2	10.0587	10.0111	10.008	10.053	10.1287	9.97774	9.98129	9.99419	10.0585	10.0346	10.1014	10.1823	8.8955	8.90168	8.76125	8.64765	8.68943	7.50792	9.23162	11.3883	8.7347	8.466	7.56598	6.39668		1.16322	1.10942	1.24676	1.40533	1.4393	2.46982	0.749671	-1.39412	1.32384	1.56861	2.53547	3.7856		1.23119	1.55977	0.328588	0.56261
GCTGAAATTGTGGCCACACTA	TRCN0000110687	Letm1	10.3691	10.263	10.3348	10.2732	10.4168	10.2306	10.1739	10.2518	10.3161	10.2356	10.4199	10.5881	9.25191	9.94673	8.94601	8.6164	6.63164	7.95092	8.23402	8.2331	14.2583	9.47408	8.85065	7.9284		1.11715	0.3163	1.38875	1.65676	3.78515	2.2797	1.93991	2.01865	-3.94215	0.761498	1.56925	2.65968		1.11974	1.38396	0.264223	0.768635
GCCTGTAGTTGTGAAGCTCTT	TRCN0000110688	Letm1	11.312	11.2966	11.3617	11.2994	11.3	11.2622	11.2461	11.2667	11.3556	11.3055	11.4582	11.5369	9.62625	9.50953	9.52851	9.22496	8.96394	7.67117	7.49353	8.6443	9.06615	9.13846	6.92697	8.41055		1.6858	1.78707	1.83318	2.07445	2.33607	3.59107	3.75257	2.62237	2.2895	2.16704	4.53121	3.1264		1.84513	3.05203	1.2069	0.00468204
CCTACCGTATCAAGGAGAGAA	TRCN0000110780	Arpc3	10.3878	10.3969	10.3812	10.271	10.2818	10.4006	10.5	10.3985	10.3682	10.4248	10.2671	10.2668	8.97647	9.03877	9.76055	10.3128	9.542	9.05	8.29514	7.76598	6.87134	7.52573	6.30859	8.33619		1.41132	1.35817	0.620645	-0.0417989	0.739815	1.35057	2.20489	2.63254	3.49685	2.89906	3.95848	1.93061		0.837083	2.4016	1.56452	0.0136425
GAGACCAAAGACACGGACATT	TRCN0000110782	Arpc3	9.12722	9.00449	9.1631	9.17442	9.28886	8.90942	8.91765	9.00981	9.17061	9.00648	9.48324	9.70969	8.37125	7.97661	9.1294	7.98869	5.65292	6.91139	8.17321	8.64334	7.29504	6.91587	6.82822	5.65156		0.755967	1.02789	0.0337012	1.18573	3.63594	1.99803	0.744444	0.366474	1.87558	2.09061	2.65502	4.05813		0.750821	2.17803	1.42721	0.0204777
GCCGAATATGTTGGAAGGAAA	TRCN0000111082	Abcb1a	11.6549	11.6558	11.6584	11.637	11.6546	11.6516	11.6164	11.6308	11.6713	11.6332	11.7039	11.8038	11.6785	11.9798	11.8812	11.4552	11.1764	11.5208	10.836	11.2027	10.8913	11.4204	10.7243	12.4006		-0.0235938	-0.324011	-0.222777	0.181812	0.47822	0.130744	0.780431	0.428063	0.780053	0.2128	0.979548	-0.596821		-0.0971423	0.39913	0.496272	0.038644
CCCACTTATGATGCTGATCTT	TRCN0000111083	Abcb1a	10.6024	10.5573	10.5467	10.4862	10.4945	10.5942	10.5884	10.5467	10.5333	10.5656	10.41	10.3557	9.5437	9.18622	9.3213	8.74612	7.8141	9.18441	7.54554	7.68974	7.63755	8.3786	8.15721	8.0869		1.05874	1.37108	1.22537	1.7401	2.68036	1.40979	3.04281	2.85696	2.89579	2.18696	2.25276	2.26876		1.34882	2.44927	1.10045	0.0010085
CCTAAATTGAATCCCAGAGTA	TRCN0000111245	Chi3l3	14.0621	14.0009	14.0593	13.9706	13.959	14.0719	14.1143	14.0838	14.0403	14.097	13.9464	14.001	14.6541	14.9127	14.998	14.8655	14.8542	15.0309	16.5052	15.3978	16.1948	14.4126	13.9379	15.0793		-0.591973	-0.911808	-0.938666	-0.894877	-0.895202	-0.959063	-2.39098	-1.31403	-2.15455	-0.315552	0.00855781	-1.07836		-0.834331	-1.1374	-0.303066	0.344115
CCATGATGTAGACTTCCTTAT	TRCN0000111387	Polm	10.6398	10.6752	10.6521	10.6018	10.5298	10.7384	10.7657	10.7057	10.6532	10.7359	10.5184	10.4676	10.6482	10.7152	10.2981	10.0222	9.58534	9.93429	9.85222	9.61319	12.7937	10.5507	7.95605	9.28862		-0.00841517	-0.039975	0.353993	0.579567	0.944491	0.804099	0.913463	1.09248	-2.14049	0.185194	2.56236	1.17897		0.221293	0.692571	0.471278	0.365071
GCGATGAAACACCAAATAGTA	TRCN0000112231	Dnajb4	11.9759	12.0125	11.9806	12.0509	11.9987	11.9795	11.9426	11.966	11.9688	11.9818	12.0247	11.992	12.9957	13.2383	12.3691	12.3079	10.2148	10.6201	11.3338	10.7697	13.1203	12.0158	10.2668	12.2754		-1.01982	-1.22577	-0.388522	-0.256996	1.78385	1.35938	0.608862	1.19628	-1.15148	-0.0339978	1.75793	-0.283385		-0.722777	0.654679	1.37746	0.0111879
GCCAACAATGGACGGAAGAAA	TRCN0000112234	Dnajb4	10.3974	10.4292	10.4233	10.437	10.3886	10.4011	10.3947	10.4057	10.4389	10.4278	10.5013	10.5301	11.6492	11.7913	12.3636	11.978	10.3183	9.75512	12.1418	11.1265	11.3673	10.7156	9.90618	9.33118		-1.25184	-1.36213	-1.94029	-1.54102	0.0702216	0.645974	-1.74712	-0.720733	-0.928392	-0.287867	0.595135	1.19891		-1.52382	-0.146734	1.37709	0.00489625
GCCACCAACAAACTATGTTAA	TRCN0000112325	Sema6d	10.3491	10.3858	10.395	10.4111	10.3646	10.4191	10.4055	10.3837	10.3916	10.3512	10.4266	10.3347	9.32686	9.68511	9.68519	9.23414	9.53751	7.09749	7.04549	6.66341	9.30419	8.06424	8.00556	8.8299		1.02229	0.700677	0.70985	1.17691	0.827084	3.32157	3.36005	3.72034	1.08737	2.28695	2.42102	1.50478		0.902434	2.31614	1.41371	0.00804497
GCCACCAAACACGGATACAAA	TRCN0000112329	Sema6d	9.96653	10.0001	9.92117	9.93181	9.9458	9.88116	9.94502	9.90549	9.96977	9.9412	10.0519	10.0613	9.7912	9.51859	9.62154	9.17975	7.71061	7.02526	7.49834	6.97007	10.5432	8.22828	8.08831	8.79595		0.175334	0.48148	0.299632	0.752059	2.23519	2.85591	2.44668	2.93542	-0.573428	1.71292	1.96359	1.26533		0.427126	1.8552	1.42808	0.00879254
GCATTGTCTGAAAGAGAACAT	TRCN0000112735	Magee1	10.8441	10.9145	10.8798	10.9285	10.8521	10.9585	10.8964	10.9284	10.9449	10.9332	10.9175	10.8583	10.9594	10.5496	10.7853	10.6347	9.2643	9.89738	8.81514	9.9363	10.2307	10.531	9.1619	9.21396		-0.11536	0.364908	0.0944241	0.293756	1.58783	1.06109	2.08126	0.992066	0.714146	0.402207	1.75565	1.64438		0.159432	1.27983	1.1204	0.000716539
GCTAGATGCTTCTGGCTCAAA	TRCN0000112739	Magee1	10.1578	10.1653	10.2292	10.1537	10.2003	10.2185	10.1438	10.1368	10.2383	10.1839	10.2786	10.3828	10.2545	9.97843	9.27211	10.1566	8.11947	10.0273	8.42366	8.09355	12.1391	10.5337	9.92007	11.01		-0.0967288	0.186829	0.957052	-0.00290638	2.08084	0.19121	1.72011	2.04322	-1.90083	-0.349859	0.358548	-0.627205		0.261061	0.439505	0.178444	0.756016
CGCTGATTACTTCTCCAACTA	TRCN0000113256	Otud5	10.059	9.99118	9.95627	10.0541	10.0785	9.88903	9.87177	9.99624	9.94108	9.95993	10.1111	10.2198	9.52142	9.78354	10.1658	10.2486	7.49857	7.79344	7.56705	7.04484	9.14256	8.42933	8.96858	10.1097		0.537586	0.207636	-0.209491	-0.194491	2.57996	2.09558	2.30472	2.9514	0.798529	1.5306	1.14251	0.110121		0.0853102	1.68918	1.60387	0.00210525
CCGTCATTTAAGCCAGGGTTT	TRCN0000113257	Otud5	10.2	10.0646	10.1556	10.083	10.2175	10.061	10.0641	10.0784	10.1377	10.1025	10.2467	10.3444	9.68933	9.8536	9.84212	9.63731	9.41205	8.52624	7.64136	7.68039	8.72191	9.53757	6.74738	8.53133		0.510709	0.211027	0.313452	0.445678	0.805439	1.53474	2.42279	2.39801	1.41578	0.5649	3.49932	1.81305		0.370217	1.80675	1.43654	0.00351777
GCCAGAATTGTGCTGACGAAT	TRCN0000113540	Zmym5	9.13258	9.03595	9.08657	9.16376	9.21402	9.06165	8.95229	8.97495	9.1141	9.06572	9.16987	9.19945	8.60707	8.58666	8.62193	8.16703	6.1572	6.54433	7.63118	6.76244	7.88144	10.9365	8.01767	7.57971		0.52551	0.449292	0.464648	0.996734	3.05683	2.51731	1.32111	2.21251	1.23266	-1.87076	1.1522	1.61974		0.609046	1.4052	0.796154	0.180854
CTCCAGCAATACCTAATGAAA	TRCN0000113544	Zmym5	11.8219	11.7939	11.7848	11.7216	11.7237	11.8472	11.8652	11.8175	11.7478	11.8069	11.6549	11.5808	10.6752	10.8251	11.4061	11.261	9.74959	9.77201	10.1426	9.80737	9.13353	9.33021	10.3372	10.7354		1.14667	0.968852	0.378652	0.460658	1.97413	2.07515	1.72258	2.01009	2.61426	2.47671	1.31775	0.845347		0.738708	1.8795	1.14079	0.00275081
CTGCTAGGTAACCCTCTCTAT	TRCN0000114431	Car14	11.8392	11.7895	11.8485	11.7981	11.7566	11.7822	11.8121	11.8155	11.832	11.8143	11.8957	11.9962	13.785	13.6905	13.1491	12.8657	11.5724	12.0744	12.349	12.5142	14.1198	15.4302	17.1297	16.1498		-1.94579	-1.901	-1.30061	-1.06763	0.184138	-0.292242	-0.53689	-0.698711	-2.28777	-3.6159	-5.23405	-4.15368		-1.55376	-2.07939	-0.52563	0.505742
GATCACATTCTGAGTCGTCTA	TRCN0000114435	Car14	10.1826	10.2553	10.2089	10.2482	10.2564	10.1848	10.2074	10.2348	10.2673	10.2496	10.3041	10.2806	9.80615	9.92797	9.93117	9.67094	8.18041	8.08054	9.61098	9.8308	9.87784	9.71523	9.6209	11.5264		0.376409	0.32728	0.277704	0.577217	2.07601	2.10426	0.596392	0.404007	0.389444	0.534346	0.683166	-1.24573		0.389653	0.692737	0.303085	0.450642
GTGGCTCAGGAGTATTATGAA	TRCN0000115183	Aip	9.29062	9.19537	9.34574	9.46441	9.47064	9.09181	9.16345	9.16889	9.37802	9.20955	9.71983	9.88885	8.79674	8.00695	7.52974	7.706	5.91193	5.33684	7.19113	7.09918	8.77087	8.04524	7.26278	6.28062		0.493878	1.18842	1.816	1.75841	3.55872	3.75497	1.97232	2.06971	0.60715	1.16431	2.45705	3.60823		1.31418	2.39906	1.08488	0.062751
GCTCATCGTTGGCAAGAAGTT	TRCN0000115184	Aip	0	0	0	0	0	0	0	0	0	0	0	0	0	0	0	0	0	0	0	0	0	0	0	0		0	0	0	0	0	0	0	0	0	0	0	0		0	0	0	#DIV/0!
GCAATCAAATGTGAGGACAAA	TRCN0000119868	Eif2s1	13.2541	13.3002	13.2942	13.2666	13.2381	13.2956	13.3053	13.2754	13.2982	13.2941	13.2752	13.263	13.5506	13.4915	13.4876	13.468	15.6903	15.3705	12.9952	12.8801	12.6864	13.0621	12.5827	12.9988		-0.296491	-0.191342	-0.193311	-0.201318	-2.4522	-2.07494	0.310135	0.395241	0.611777	0.232059	0.692513	0.26424		-0.220616	-0.252647	-0.0320319	0.944579
GATCACTTTAAGTCTACAGAT	TRCN0000119941	Rpa2	10.707	10.7453	10.7446	10.7704	10.7872	10.751	10.8023	10.7687	10.7449	10.7474	10.7129	10.6386	9.85386	9.84922	10.1248	10.2747	6.74358	7.47765	7.97712	7.52191	6.4349	7.53848	7.81638	8.4539		0.853112	0.896125	0.619803	0.495658	4.04364	3.27334	2.82522	3.24678	4.31002	3.20894	2.89648	2.18473		0.716175	3.24864	2.53247	4.49115e-06
CCAAATGATGTGGAGTTTGAT	TRCN0000119959	Xrn2	11.0783	11.1172	11.0536	11.0282	10.9898	11.1376	11.0902	11.0795	11.049	11.113	10.8633	10.8204	10.4829	10.5652	10.5442	10.6307	9.41116	9.34461	9.62936	10.1603	10.3384	10.2302	10.5586	11.8857		0.595419	0.552034	0.509372	0.397564	1.57868	1.79303	1.46086	0.919211	0.710639	0.882757	0.304699	-1.06537		0.513597	0.823063	0.309466	0.370347
CAACGATACTACAAGAACAAA	TRCN0000119960	Xrn2	10.9695	10.9493	10.8972	10.9271	10.8786	10.9812	11.0147	10.9775	10.8975	10.9503	10.7784	10.6672	10.8521	10.9757	10.839	11.074	9.43021	11.4321	11.1495	9.58991	9.94407	9.70437	10.3458	7.27115		0.117389	-0.0263536	0.0582574	-0.146932	1.44843	-0.450821	-0.13474	1.38763	0.953455	1.24591	0.432603	3.39606		0.000590297	1.03482	1.03423	0.0434241
GCTGACGTGATTGTGTTATTT	TRCN0000120066	Hacl1	15.1936	15.2621	15.2139	15.2714	15.2302	15.2556	15.2042	15.2177	15.2385	15.2112	15.2349	15.2127	15.5444	15.6203	15.3384	15.0608	16.7437	16.6219	15.9111	15.832	14.8174	15.1158	13.7029	15.5773		-0.350827	-0.358184	-0.1245	0.210531	-1.5135	-1.36633	-0.706957	-0.614273	0.421064	0.0954841	1.53205	-0.36465		-0.155745	-0.314639	-0.158894	0.682638
GCAGTGGTACAGGAACAGTTT	TRCN0000120139	Clybl	9.42563	9.48537	9.5645	9.5035	9.44564	9.45027	9.48908	9.46728	9.51454	9.48763	9.6297	9.8001	9.84256	10.5594	9.53138	8.9932	8.17412	6.08827	8.11494	7.86339	9.26448	9.54931	10.5208	13.6375		-0.416921	-1.07401	0.0331154	0.510293	1.27152	3.362	1.37414	1.60389	0.25006	-0.0616841	-0.891077	-3.83738		-0.23688	0.383934	0.620814	0.470742
CCTGAAGAAATCCGATGGTTT	TRCN0000120140	Clybl	9.93741	9.77101	9.85976	9.64766	9.78784	9.80601	9.88612	9.82563	9.75712	9.78011	9.69395	9.67966	9.79479	9.81369	10.0748	9.79811	9.28002	10.2592	8.592	7.96238	8.58905	9.34635	8.56362	7.57664		0.142622	-0.0426769	-0.215007	-0.15045	0.507818	-0.453204	1.29412	1.86326	1.16806	0.433764	1.13034	2.10303		-0.0663779	1.0059	1.07228	0.00759765
CCAGTCTATCATCTACAGCAT	TRCN0000120153	Cdhr5	10.5777	10.5618	10.5456	10.5211	10.4712	10.6192	10.6379	10.6138	10.5274	10.5981	10.4234	10.4258	9.83877	10.177	10.834	10.7718	6.77719	9.98939	10.8328	9.65818	10.011	8.36231	8.34201	8.3765		0.738915	0.384771	-0.288437	-0.250738	3.69403	0.629787	-0.194963	0.955607	0.51639	2.23584	2.08137	2.0493		0.146128	1.49592	1.34979	0.0241462
GTTGGAGAGGTATTAGAATTA	TRCN0000120165	Pet2	12.0334	12.1047	12.1095	12.0477	12.0164	12.0981	12.1595	12.123	12.1141	12.1297	12.0762	12.0949	12.3065	12.3304	11.7632	11.7957	14.3864	13.785	12.1286	12.1995	11.9112	12.7995	11.3396	11.9865		-0.273183	-0.225714	0.346372	0.251993	-2.36999	-1.68684	0.0308683	-0.0765161	0.202859	-0.669747	0.736606	0.108387		0.0248669	-0.465546	-0.490413	0.257054
GAGCCTTATGACTATAAGTTT	TRCN0000120415	Ccbl2	9.8907	9.73473	9.88134	9.95865	9.94524	9.72674	9.75158	9.73334	9.85289	9.74613	10.1743	10.4401	10.2588	9.77181	9.40645	8.7071	7.28148	10.0361	8.34224	9.05065	11.8566	11.0411	10.6132	9.72313		-0.368079	-0.0370828	0.474895	1.25155	2.66376	-0.309348	1.40934	0.682687	-2.0037	-1.29495	-0.438909	0.716993		0.330321	0.178233	-0.152088	0.816232
GTGAAGTGGATGACGAAACAT	TRCN0000120416	Ccbl2	10.4078	10.413	10.4794	10.4774	10.5259	10.3861	10.3249	10.3884	10.5492	10.4535	10.6369	10.8088	10.624	10.6732	9.99438	10.045	9.5586	9.5716	8.95107	9.82062	9.72391	10.1453	8.86126	10.8174		-0.216217	-0.260222	0.48497	0.432398	0.967318	0.81449	1.37388	0.567805	0.82532	0.30821	1.7756	-0.00864348		0.110232	0.827997	0.717765	0.0344225
CCAGATTAAATCCTTAGCAAT	TRCN0000120777	Gabarapl2	12.5947	12.5504	12.5115	12.4365	12.4657	12.6442	12.6348	12.6052	12.4734	12.5717	12.3069	12.307	12.6012	12.4911	12.7245	12.4313	12.5151	11.517	12.8572	13.2798	12.1915	12.162	11.4464	11.601		-0.00642957	0.0592915	-0.213047	0.00519779	-0.0493144	1.12726	-0.222401	-0.674616	0.281984	0.409625	0.860514	0.705971		-0.038747	0.304878	0.343625	0.157445
GCCTAACTATGGGACAGCTTT	TRCN0000120781	Gabarapl2	10.6498	10.6551	10.6754	10.6631	10.6568	10.6192	10.5945	10.6582	10.6949	10.6326	10.7332	10.7954	10.4857	10.3055	9.73444	9.74879	10.1107	9.87388	10.0212	9.24266	10.2523	9.83886	9.92927	10.0804		0.164056	0.349556	0.94095	0.914321	0.54608	0.745299	0.573293	1.41553	0.442602	0.793731	0.803978	0.715039		0.592221	0.754445	0.162224	0.502029
GCTGTGAGTTACCATGTGGTT	TRCN0000121002	Mdp1	9.84013	9.85475	9.93782	9.90886	9.90367	9.84543	9.8193	9.86798	9.94352	9.8348	10.0152	10.0623	9.3169	8.94113	9.10317	8.76735	5.55941	8.06965	7.2436	6.47726	8.42012	9.29041	7.3114	10.8564		0.523223	0.913617	0.834649	1.14151	4.34426	1.77577	2.57571	3.39072	1.5234	0.544392	2.70377	-0.794142		0.853249	2.00799	1.15474	0.0868019
CTTTGAGAGGTTGCACCACAA	TRCN0000121006	Mdp1	11.3457	11.2536	11.3073	11.259	11.3444	11.3004	11.2615	11.263	11.3137	11.326	11.3518	11.4117	9.81003	9.92078	9.84937	10.0806	6.06947	6.68958	8.1702	7.29812	9.12747	10.0257	8.93521	8.43196		1.53566	1.3328	1.45794	1.17838	5.27498	4.61079	3.09132	3.96487	2.18624	1.30031	2.41662	2.97976		1.3762	3.22811	1.85192	0.00520331
CCCAGAGTGAAGAGGGATAAA	TRCN0000123520	Gpatch1	10.7346	10.7741	10.76	10.738	10.6979	10.7935	10.8509	10.7671	10.7499	10.8121	10.6973	10.6482	10.6011	10.4133	10.9207	10.4645	8.94435	10.061	11.8377	11.4264	8.97405	9.85932	8.5156	8.32524		0.133455	0.360835	-0.160774	0.273524	1.75355	0.732462	-0.986755	-0.65933	1.77582	0.952773	2.18167	2.32292		0.15176	1.00914	0.857378	0.0995859
CCAGAGTGAAGAGGGATAAAT	TRCN0000123522	Gpatch1	12.1332	12.1699	12.1409	12.074	12.0822	12.2285	12.2403	12.209	12.1146	12.189	12.0765	11.9715	10.9842	10.8295	10.5859	10.5877	10.562	10.6794	9.02621	12.1173	9.50985	10.5241	9.80644	10.3425		1.14904	1.34035	1.55503	1.48629	1.52019	1.54909	3.21409	0.0916989	2.60473	1.66484	2.27011	1.62899		1.38268	1.81797	0.43529	0.23473
CGCTATGACAACTACAAGAAA	TRCN0000123705	Sppl3	10.8133	10.7834	10.7577	10.7974	10.7757	10.7823	10.7456	10.7484	10.7645	10.7888	10.6906	10.7415	10.1554	10.2765	9.61304	9.52212	6.99285	8.30669	9.33778	9.34089	8.12687	8.60749	8.74738	10.4313		0.65789	0.506962	1.14461	1.27524	3.78282	2.47559	1.40779	1.40751	2.63761	2.18136	1.94325	0.310126		0.896178	2.01826	1.12208	0.0212629
TCCTCTACTTGGTGCCATTTA	TRCN0000123708	Sppl3	10.1872	10.1195	10.1954	9.95711	10.1052	10.1707	10.2441	10.1809	10.1018	10.1591	10.0484	10.1414	9.31099	9.21683	9.1509	9.27844	8.10299	8.02203	7.45779	8.65006	10.3255	10.931	7.82429	8.21297		0.876217	0.902666	1.04448	0.678662	2.00223	2.1487	2.7863	1.53088	-0.223685	-0.771902	2.22415	1.92844		0.875506	1.45314	0.577633	0.240465
GCATTTGTAAAGGTGCAGTTA	TRCN0000124105	Rad52	12.2528	12.3175	12.3281	12.3558	12.3114	12.3058	12.2909	12.3298	12.349	12.325	12.2904	12.3806	12.3687	12.142	13.0531	12.6855	12.4041	12.3156	11.5494	11.8813	10.9955	11.5057	10.504	12.2128		-0.115853	0.175489	-0.72505	-0.329709	-0.0927015	-0.00983843	0.741538	0.448596	1.35355	0.819275	1.78642	0.167774		-0.248781	0.651827	0.900607	0.0142935
GCAGAGACTCTGAACCTCATA	TRCN0000124106	Rad52	0	0	0	0	0	0	0	0	0	0	0	0	0	0	0	0	0	0	0	0	0	0	0	0		0	0	0	0	0	0	0	0	0	0	0	0		0	0	0	#DIV/0!
CTATTGAAGTTGGAACCAAAT	TRCN0000124139	Mcm6	10.815	10.7796	10.7628	10.6877	10.7599	10.7458	10.8582	10.8057	10.754	10.7695	10.6382	10.6573	4.78103	4.40328	5.12506	4.47773	0.337017	2.74146	4.1243	3.26348	5.47358	4.73474	-0.106449	3.16262		6.03396	6.37628	5.63776	6.21	10.4229	8.00437	6.73392	7.54226	5.28046	6.03479	10.7447	7.49468		6.0645	7.78226	1.71776	0.0416439
GCTGAGAGCATTAAGAACCAA	TRCN0000124142	Mcm6	11.6804	11.7511	11.7324	11.7811	11.7343	11.7571	11.6916	11.7047	11.7616	11.726	11.771	11.7811	6.81743	7.27617	6.67483	6.03495	5.56584	6.92526	7.27754	6.11592	6.78785	7.90748	5.35298	5.78534		4.86297	4.47498	5.05754	5.74617	6.16849	4.83187	4.41406	5.58881	4.97379	3.81849	6.41798	5.99573		5.03542	5.27615	0.240737	0.579019
CCTCACTAGAGAACAGATGTT	TRCN0000124876	Whsc2	10.3918	10.4701	10.409	10.4037	10.377	10.4941	10.471	10.4616	10.4254	10.4493	10.2683	10.2162	11.2749	11.276	10.9927	11.036	8.97786	9.37651	9.14998	9.4626	10.1485	10.8381	8.02798	8.89054		-0.883055	-0.805923	-0.583759	-0.632324	1.39918	1.11763	1.321	0.999005	0.276884	-0.388851	2.24028	1.32564		-0.726265	1.03635	1.76261	0.000304497
CCTGTTCAGCAGCAACCTAAA	TRCN0000124877	Whsc2	7.40717	7.40265	7.52638	7.46766	7.3167	7.435	7.46976	7.42687	7.42097	7.31639	7.24489	7.29369	6.60781	5.24741	6.08094	4.67037	5.84481	5.7336	5.29607	3.84844	4.87712	4.48682	3.06348	3.68047		0.799355	2.15524	1.44544	2.79729	1.47189	1.7014	2.1737	3.57843	2.54385	2.82957	4.18141	3.61322		1.79933	2.76168	0.962355	0.1262
GCCAAGTACCAACACTATGGA	TRCN0000124988	Rai1	10.0736	10.0827	10.1439	10.1378	10.0604	10.044	10.0804	10.0576	10.1527	10.1294	10.1676	10.2845	8.80453	8.53206	9.49737	8.8453	5.99523	6.89738	6.78464	6.25342	13.9476	11.6495	10.6243	8.42856		1.26904	1.55066	0.646532	1.29249	4.06515	3.14659	3.29579	3.80422	-3.79491	-1.52016	-0.456666	1.85594		1.18968	1.29949	0.109811	0.918759
CCCATTGTAAAGCAACTTCAA	TRCN0000126574	Xpo1	10.5563	10.5729	10.5393	10.4844	10.4774	10.636	10.6051	10.5792	10.5173	10.5753	10.4075	10.3429	8.86973	9.39456	9.11196	8.6164	7.99165	8.28802	7.89203	8.01688	8.3769	8.91238	8.26714	8.61982		1.68656	1.17831	1.42738	1.86795	2.48575	2.34794	2.71303	2.56228	2.14037	1.66289	2.1404	1.72312		1.54005	2.22197	0.681923	0.0104516
CCAGTTAACAACCAAATGTTT	TRCN0000126578	Xpo1	12.9042	12.9057	12.8422	12.7963	12.7967	12.9536	12.9525	12.9199	12.8298	12.9041	12.6245	12.5425	12.9014	13.4734	12.458	12.3235	10.5011	10.0013	10.814	10.5109	11.6923	10.978	10.4395	10.5734		0.00275247	-0.567692	0.384201	0.472855	2.29566	2.95226	2.13853	2.40902	1.13755	1.92614	2.18507	1.96915		0.0730293	2.12667	2.05364	0.000308742
GCTGGATTGGAAGAAGATGTA	TRCN0000126922	Fbxo32	11.2542	11.3172	11.3341	11.3282	11.2859	11.3139	11.3011	11.3143	11.3448	11.3407	11.3392	11.3602	10.4756	10.3547	10.7999	10.8987	9.26232	10.3501	12.3861	11.6147	9.74462	10.2742	9.59052	9.65192		0.778593	0.962535	0.534247	0.429468	2.02356	0.963846	-1.08501	-0.300318	1.60022	1.06652	1.74864	1.70832		0.676211	0.965723	0.289512	0.497411
GTGCTTACAACTGAACATCAT	TRCN0000126923	Fbxo32	9.79889	9.79164	9.78476	9.79909	9.84543	9.73839	9.66787	9.69815	9.75988	9.69853	9.85895	9.90792	7.55028	6.65395	6.00269	6.24931	3.27562	2.86176	6.63555	5.15964	6.48876	5.90748	6.36928	5.25778		2.24862	3.13769	3.78208	3.54978	6.56981	6.87663	3.03232	4.53851	3.27112	3.79106	3.48967	4.65014		3.17954	4.52741	1.34787	0.0547927
GCTGAGAATCATGCACATCAT	TRCN0000126962	Vps11	11.1391	11.1313	11.0936	11.1246	11.1375	11.1089	11.0911	11.0978	11.1101	11.11	11.1144	11.0905	10.6086	10.4756	9.76334	9.87005	8.1572	7.45631	7.81835	8.04192	12.896	12.5459	10.6521	10.8466		0.530569	0.655694	1.33022	1.25458	2.98034	3.6526	3.27279	3.05583	-1.78584	-1.43591	0.462352	0.24396		0.942766	1.30577	0.363	0.665008
GCCAACTGTTGTGTCTTGTTT	TRCN0000126963	Vps11	10.7756	10.817	10.8138	10.8087	10.8123	10.7891	10.7209	10.7669	10.8281	10.7881	10.8601	10.8967	9.59776	9.15365	9.31035	8.82519	9.75698	9.49983	8.32431	8.36618	10.4102	9.59621	8.50088	8.88683		1.17784	1.66336	1.5034	1.98355	1.05537	1.28927	2.39662	2.40072	0.417892	1.19192	2.35926	2.00991		1.58204	1.64012	0.0580791	0.857182
CCACACACTACAGACAGATTT	TRCN0000127182	Spryd4	10.7611	10.7689	10.7183	10.7149	10.6792	10.7833	10.7721	10.7979	10.7167	10.8032	10.5522	10.5051	10.2691	10.6945	10.8585	10.3178	7.0165	9.48586	7.57769	8.51141	7.91415	8.31442	7.21848	8.36942		0.491995	0.0744728	-0.140254	0.397072	3.66275	1.29743	3.19442	2.28653	2.80258	2.48873	3.33376	2.13567		0.205822	2.65023	2.44441	1.40499e-05
GCGCTGATGATCTCGCTCATT	TRCN0000127390	Wrb	8.08524	8.01768	8.06199	8.08828	8.38816	7.89089	7.80396	7.8635	8.17522	7.94024	8.51415	8.73973	7.24905	6.38139	6.34621	5.49819	6.21558	3.70976	5.1243	4.56929	6.48119	6.46791	4.71798	5.10407		0.836185	1.6363	1.71579	2.59009	2.17258	4.18114	2.67966	3.29421	1.69404	1.47233	3.79617	3.63566		1.69459	2.86572	1.17113	0.0482422
GTTGCTTTCTACATACTACAA	TRCN0000127393	Wrb	10.8601	10.9316	10.8805	10.9304	10.8894	10.9153	10.9069	10.9078	10.919	10.9269	10.9356	10.8862	8.4709	8.52609	8.46341	9.24856	8.10189	6.66911	7.60913	6.98837	10.8319	11.2663	7.44301	10.2484		2.38924	2.40547	2.41706	1.68188	2.78751	4.24619	3.29778	3.91948	0.0871145	-0.339352	3.49261	0.637771		2.22341	2.26614	0.0427267	0.951074
CCAAACACTTAGGTCTCAGAT	TRCN0000173172	Zfp36l2	9.91206	9.81802	9.82037	9.75628	9.82315	9.86264	9.93125	9.91526	9.84076	9.86003	9.71635	9.74878	9.02563	8.93061	9.21915	8.49438	5.75205	8.17064	6.69816	7.20729	8.24337	8.50269	7.23043	7.03858		0.88643	0.887405	0.601214	1.2619	4.0711	1.692	3.23309	2.70797	1.59739	1.35734	2.48592	2.7102		0.909238	2.48187	1.57264	0.00151679
GCATCAGAGATTACCTCACTT	TRCN0000173377	Tmem33	10.2488	10.3563	10.336	10.3135	10.2732	10.3335	10.2845	10.3527	10.3416	10.3067	10.3279	10.449	9.95388	9.77433	8.86701	9.79501	9.25538	7.4682	8.37745	7.3103	5.90002	7.78602	6.98101	7.35783		0.294878	0.58199	1.46902	0.518478	1.01779	2.86534	1.90705	3.04236	4.44155	2.52073	3.34692	3.09113		0.716093	2.77911	2.06302	0.000901209
GAGCAATCAATGGACAGTCAT	TRCN0000173401	Klhl10	10.2005	10.0948	10.159	10.2821	10.3493	10.0176	9.95635	10.0736	10.219	10.078	10.5724	10.8095	9.84602	9.92078	8.42245	9.0558	7.29121	8.22493	7.06937	6.85178	9.7867	9.72721	6.35298	9.09336		0.354526	0.174029	1.7366	1.22631	3.05808	1.79264	2.88697	3.22178	0.432278	0.350767	4.21938	1.71616		0.872868	2.20976	1.33689	0.0538596
GCTCTCAAGGAAGTGGTATTT	TRCN0000173610	Cry1	11.4474	11.508	11.5106	11.5096	11.4428	11.4622	11.4992	11.4492	11.5469	11.4961	11.5616	11.6295	11.7382	11.8026	11.7491	11.2906	10.7748	10.4726	11.5216	11.8427	9.55834	10.4835	10.2408	10.9111		-0.290773	-0.294634	-0.238482	0.218965	0.668011	0.989604	-0.0223972	-0.393478	1.98858	1.01261	1.32081	0.718417		-0.151231	0.785269	0.9365	0.0100308
CAATCTGTGTCCTCTACTCTT	TRCN0000173643	Smug1	10.3711	10.3926	10.3834	10.3638	10.3039	10.4019	10.4216	10.4221	10.4124	10.4344	10.3631	10.4642	10.9062	10.5751	9.7762	9.69219	7.53177	7.1808	7.1692	7.25342	11.9988	10.4454	7.84192	9.35514		-0.535152	-0.182579	0.607229	0.671639	2.77216	3.22108	3.25236	3.16864	-1.58639	-0.0110026	2.52123	1.10905		0.140284	1.80589	1.66561	0.0408734
GCTTGGAGAGGAGGGAAATTT	TRCN0000173879	Setd6	10.978	11.026	11.1001	11.0098	11.0319	11.0037	11.0641	11.0167	11.0907	11.0377	11.1907	11.1961	10.955	10.961	10.3864	9.98643	9.3686	10.264	8.40331	8.7338	10.7635	10.7367	10.6795	12.4827		0.0230008	0.0649695	0.713647	1.02332	1.66331	0.739667	2.66084	2.28292	0.327271	0.301031	0.511169	-1.28656		0.456235	0.899956	0.443721	0.406277
GCTGTTTGTTGGAGAACCTGT	TRCN0000173921	Adi1	9.40407	9.39862	9.47331	9.44803	9.49636	9.3919	9.39576	9.36169	9.47545	9.44093	9.54833	9.69104	9.71814	9.92419	10.1054	10.2192	9.48507	9.12479	10.0755	9.00569	9.52282	10.2328	8.96412	10.064		-0.314077	-0.525575	-0.632062	-0.771163	0.0112917	0.267107	-0.679789	0.355992	-0.0473732	-0.791836	0.584211	-0.373001		-0.560719	-0.0841747	0.476544	0.038703
GCAACTGGAGATTGACCAGAA	TRCN0000173938	Nudc	10.7043	10.692	10.7967	10.8134	10.7528	10.7148	10.7151	10.6878	10.8185	10.721	10.8962	10.9442	11.6643	11.6389	11.1237	11.0204	9.70225	11.1986	11.3297	11.4777	12.1179	11.2495	9.66118	9.97553		-0.960022	-0.946887	-0.326973	-0.206993	1.05051	-0.483801	-0.614585	-0.789821	-1.29936	-0.528432	1.23498	0.96869		-0.610219	-0.0577276	0.552491	0.19804
CGAAATCAATACCAAGAAGAT	TRCN0000174362	Nudc	11.3453	11.3677	11.2893	11.3398	11.3184	11.3431	11.3399	11.3906	11.3116	11.3675	11.1945	11.1989	9.41601	9.22852	8.05836	7.706	5.62242	5.78014	7.87611	6.967	8.29396	7.02079	7.18203	6.79065		1.92933	2.13918	3.23093	3.63377	5.69601	5.56297	3.46376	4.42364	3.01766	4.34666	4.01244	4.40822		2.7333	4.36642	1.63312	0.0181532
GCATGTGGAGATTCACTTATT	TRCN0000174596	Lass5	10.0752	10.2207	10.1717	10.18	10.1322	10.2391	10.1816	10.1839	10.2102	10.1852	10.2088	10.1621	10.3587	10.1147	9.23081	9.30772	8.56584	9.46642	8.76815	7.68601	8.02638	9.87555	8.52897	9.63651		-0.283489	0.105981	0.94093	0.872326	1.56632	0.772713	1.41347	2.49792	2.18386	0.309653	1.67983	0.525591		0.408937	1.36867	0.959734	0.0464309
GCAAAGATACACTTCCCAATT	TRCN0000174668	Adi1	13.0742	13.1768	13.1142	13.146	13.0922	13.1941	13.1482	13.1692	13.1262	13.1544	13.064	13.0224	12.3193	12.2556	12.4344	12.2498	12.4261	12.2338	12.1681	12.3508	12.6389	12.6605	11.0749	12.7262		0.754918	0.921218	0.67974	0.896195	0.666053	0.960286	0.980086	0.818398	0.487304	0.493895	1.98906	0.296188		0.813018	0.836409	0.0233917	0.906981
GCCAATGAACTTGTAAACCTA	TRCN0000174691	Cse1l	10.6743	10.7443	10.6887	10.8006	10.7196	10.7407	10.7313	10.7017	10.7348	10.7255	10.715	10.6894	2.14243	3.78313	1.45046	3.1558	-1.24795	2.74146	1.14079	2.41548	4.80615	2.90185	3.47851	2.70319		8.53182	6.96116	9.23824	7.64479	11.9675	7.99921	9.59049	8.28622	5.92865	7.82365	7.23653	7.98623		8.094	8.35231	0.258309	0.754837
GCAGATCTTCATTCTACTATT	TRCN0000174952	Cse1l	10.9998	11.1132	11.0559	11.0741	11.0116	11.0843	11.05	11.0837	11.0236	11.0804	10.9981	10.96	3.93093	6.48357	5.65089	2.1558	0.559409	2.80286	3.72575	5.47726	12.3787	5.56719	1.11594	6.07823		7.06885	4.62959	5.40505	8.91832	10.4522	8.28147	7.32424	5.60645	-1.35519	5.51326	9.88213	4.88179		6.50546	6.32329	-0.18217	0.912863
GCAATTCATGATGACCAATAA	TRCN0000175156	Tmem33	11.4762	11.6051	11.5603	11.6182	11.5414	11.6019	11.5311	11.5716	11.5837	11.579	11.5677	11.5578	12.6102	12.593	11.5304	12.0678	9.36722	9.85181	9.22245	9.20012	11.0647	11.2601	7.99684	8.61083		-1.13404	-0.987919	0.0299787	-0.449633	2.17418	1.75005	2.3086	2.37151	0.518989	0.31888	3.57082	2.94694		-0.635402	1.995	2.6304	0.000252264
CTTCCAAAGGATCAACAGGAT	TRCN0000175444	Ift52	10.2378	10.2448	10.2247	10.1241	10.1914	10.2391	10.3332	10.2694	10.1987	10.1984	10.1253	10.0212	9.70363	10.1081	9.89117	10.1343	9.31811	9.39657	9.28822	9.55298	9.09559	9.64837	9.85065	9.36942		0.534218	0.136764	0.333572	-0.0101938	0.873298	0.842568	1.04499	0.716368	1.10315	0.549997	0.274622	0.651748		0.24859	0.757092	0.508502	0.0126002
GCTTATGAACAACCTCTCTAA	TRCN0000175756	Smug1	11.5403	11.606	11.5899	11.6045	11.5404	11.6236	11.6308	11.6276	11.5986	11.6242	11.5667	11.5408	10.4837	10.4846	10.3312	10.236	8.43505	7.80474	8.34847	9.41266	8.76308	9.83812	8.89073	9.04026		1.05664	1.12141	1.25864	1.36843	3.10534	3.81882	3.28237	2.21495	2.83556	1.78603	2.67596	2.50056		1.20128	2.77745	1.57617	0.000135395
GCACCACAACTCAATATGAAA	TRCN0000175839	Zfp36l2	11.3238	11.3877	11.3561	11.377	11.3293	11.386	11.3575	11.3465	11.3759	11.3369	11.3706	11.2954	10.1386	9.39128	9.42333	9.24629	7.63317	7.36001	7.40587	7.91213	7.32919	7.32602	4.89355	7.49109		1.18524	1.99637	1.93281	2.13071	3.69608	4.02595	3.95164	3.43439	4.04673	4.01092	6.47709	3.8043		1.81128	4.18089	2.3696	0.000140656
GCTCAAACAGTGTAAAGACAA	TRCN0000175889	Slmap	12.6151	12.6785	12.6298	12.6586	12.6138	12.6549	12.6137	12.6138	12.6371	12.6333	12.6244	12.5947	12.6682	12.6599	12.5364	12.3934	11.4498	11.3128	12.0484	11.5414	11.8416	12.9554	11.7952	12.454		-0.053086	0.0185314	0.0933697	0.265202	1.16399	1.34206	0.565338	1.07243	0.795514	-0.322065	0.829201	0.140715		0.0810042	0.698398	0.617394	0.0168519
GAAGAAAGTGTCTGTGACTAT	TRCN0000175950	Nob1	13.1067	13.0568	13.1035	13.1263	13.1507	13.0735	13.0504	13.1054	13.1388	13.1279	13.2043	13.2693	13.6735	13.4987	13.072	12.9915	13.7771	13.3066	12.5327	13.0369	12.4625	12.7959	11.9155	12.9895		-0.566872	-0.441976	0.0314378	0.134832	-0.626354	-0.233123	0.51773	0.0684651	0.676304	0.33199	1.28888	0.279771		-0.210644	0.287958	0.498602	0.0947673
GCAAGCAGACTGAATATTGAA	TRCN0000175971	Cry1	10.8122	10.9159	10.8631	10.9269	10.8412	10.903	10.875	10.8834	10.9155	10.8782	10.9132	10.8697	8.73828	8.58379	9.87834	9.41991	6.38505	6.39781	7.89081	9.52401	8.5343	9.26817	7.79844	8.33255		2.07387	2.33212	0.984803	1.50699	4.45619	4.50515	2.98418	1.35935	2.38125	1.61	3.11475	2.53713		1.72445	2.8685	1.14405	0.0489099
GCTGTTTGTGTCAGAACCTAT	TRCN0000175987	Ift52	11.3543	11.3988	11.4169	11.436	11.4022	11.3787	11.3295	11.3792	11.4514	11.3793	11.4812	11.5817	11.3211	11.2595	11.2757	10.9266	10.3389	10.7464	8.65362	9.40132	11.623	11.8293	10.0572	10.4449		0.0332263	0.139326	0.141221	0.50946	1.06334	0.632305	2.67591	1.97785	-0.171586	-0.449963	1.42399	1.13685		0.205808	1.03609	0.83028	0.0613313
CCCAACTTAGACTACTACAAA	TRCN0000176628	Tbc1d5	11.2411	11.2497	11.1872	11.2053	11.1452	11.3413	11.3127	11.2741	11.22	11.2935	11.0331	11.09	9.98421	9.99799	9.42377	9.2165	8.1508	9.96063	9.32566	9.48157	8.88647	9.38214	7.95605	8.67761		1.25687	1.25169	1.76339	1.98878	2.9944	1.38071	1.98702	1.79257	2.33352	1.91141	3.07708	2.41244		1.56518	2.23614	0.67096	0.0389461
CCATGCCATTACTGTAACATT	TRCN0000176687	Ndrg3	11.0343	11.0418	10.9816	10.9164	10.9311	11.0848	11.0824	11.1058	10.9547	10.9891	10.8018	10.7458	9.73251	9.98316	10.0865	8.43723	8.15187	8.42492	6.41606	7.9201	8.76386	8.18378	8.63951	7.62354		1.30178	1.05861	0.895028	2.47919	2.77923	2.6599	4.66635	3.18573	2.19083	2.80534	2.16228	3.12228		1.43365	2.94649	1.51284	0.0134525
GAAGCAGAACAAATATCCCAT	TRCN0000176815	Gpcpd1	12.3698	12.3018	12.3425	12.4347	12.4486	12.2991	12.3274	12.3243	12.392	12.3383	12.5158	12.5405	13.4077	12.8555	12.6332	12.76	13.5156	12.6712	13.3568	12.5832	11.3929	11.8963	11.3555	12.6757		-1.03794	-0.553654	-0.290742	-0.325299	-1.06699	-0.37213	-1.02938	-0.258922	0.999169	0.442037	1.1603	-0.135134		-0.551908	-0.032631	0.519277	0.162064
GAGAAGGAGAATTACCATTAT	TRCN0000176847	Nudt15	10.8403	10.819	10.8709	10.8954	10.8114	10.874	10.9664	10.9147	10.8805	10.8964	10.8619	10.832	9.73794	9.56691	9.84212	9.7888	8.57303	8.3133	9.25595	9.58741	10.5675	10.3396	8.44814	9.86149		1.10235	1.25211	1.02883	1.10664	2.23839	2.56071	1.71048	1.32731	0.313008	0.556811	2.41377	0.970523		1.12248	1.51138	0.388896	0.244095
GAACAACTGAAGGAAACCAAA	TRCN0000177033	Ccdc82	13.4801	13.4469	13.5036	13.5166	13.5269	13.4469	13.4728	13.4755	13.4986	13.4833	13.5708	13.563	13.6845	13.6078	13.8042	13.7835	14.5107	14.7158	14.4841	13.9958	13.7697	14.008	13.4154	13.8631		-0.204439	-0.160931	-0.30063	-0.266887	-0.98382	-1.26889	-1.01134	-0.520263	-0.271007	-0.524659	0.155358	-0.300183		-0.233222	-0.5906	-0.357379	0.0697006
GCTAGTTTCAATCCTTTGTAA	TRCN0000177038	Fam96a	11.1552	11.2334	11.2161	11.2522	11.1758	11.2734	11.2304	11.2567	11.2214	11.2246	11.1829	11.1689	11.0136	11.0274	11.1781	11.1325	7.60536	10.0393	10.3168	10.227	11.7208	9.71283	9.37669	10.4426		0.141517	0.206012	0.0380159	0.11978	3.57045	1.23417	0.913555	1.02973	-0.499369	1.51177	1.80616	0.72631		0.126331	1.2866	1.16026	0.0244982
GAGAGAACATTGAACAAAGTA	TRCN0000177481	Ssx2ip	10.2507	10.2901	10.2225	10.3201	10.3059	10.2661	10.2502	10.3017	10.2802	10.2496	10.2623	10.3222	10.5769	10.0012	9.43564	8.94557	7.74074	6.53531	6.73664	7.01539	8.78862	8.82369	7.61008	7.11258		-0.326138	0.28888	0.78688	1.37454	2.56515	3.73081	3.5136	3.28632	1.49156	1.42589	2.65222	3.20961		0.53104	2.73439	2.20335	0.00213765
CACAAGTTGGAAATCTACATT	TRCN0000177506	Fam96a	12.6149	12.6619	12.6358	12.624	12.6025	12.7052	12.6987	12.6854	12.6588	12.6936	12.5523	12.5222	11.6826	11.7614	12.121	12.2732	9.25737	10.6094	10.9418	10.219	11.1793	11.3198	10.4644	11.3236		0.932385	0.90053	0.514779	0.350879	3.34509	2.0958	1.75683	2.46639	1.47952	1.37373	2.08795	1.19855		0.674643	1.97548	1.30084	0.00107199
CCATATCTCTGTCTACATCCA	TRCN0000177773	Mzt2	10.6387	10.6744	10.6754	10.6267	10.5578	10.7205	10.7552	10.7225	10.6896	10.7051	10.5442	10.5516	9.27125	9.69046	9.55092	9.6488	4.62242	6.31066	7.38526	7.15425	6.28202	8.19877	8.36116	7.09121		1.36745	0.983907	1.12447	0.977916	5.93539	4.4098	3.36999	3.56821	4.40757	2.50637	2.18301	3.46043		1.11344	3.73009	2.61666	0.000356199
CGTATGAAGAGCTCCATTTAA	TRCN0000177930	Ccz1	9.90769	9.9297	9.9459	9.87128	9.87558	9.88641	9.95837	9.94735	9.89011	9.96245	9.89482	9.87182	10.4443	10.5879	11.3065	11.7448	8.71567	9.7395	10.9189	10.7464	11.5638	10.5198	8.81241	9.77398		-0.536656	-0.658154	-1.36063	-1.8735	1.1599	0.146907	-0.960495	-0.799044	-1.67373	-0.557329	1.08241	0.0978355		-1.10723	-0.187944	0.919291	0.0824622
GAAAGCCTAAGTGTAGTCAAA	TRCN0000177959	Ccz1	10.971	10.9131	10.9855	11.0629	11.1279	10.846	10.8452	10.9394	11.0495	10.9487	11.2879	11.4585	11.2919	10.8051	10.8252	11.2341	9.52478	9.55385	10.3182	10.2512	10.9069	11.0279	9.92192	13.5917		-0.320919	0.108007	0.160316	-0.171265	1.60309	1.29215	0.526946	0.688181	0.142602	-0.0792231	1.36597	-2.1332		-0.0559653	0.425814	0.481779	0.302921
GCGTGAACTGAACTCCAATAA	TRCN0000177960	Tnrc18	9.74389	9.78188	9.76776	9.81535	9.77848	9.73756	9.67808	9.71647	9.83494	9.71694	9.92228	10.023	10.3767	10.753	10.4405	10.6508	7.40311	8.31856	9.28405	7.39505	7.49817	7.92838	6.30859	7.38091		-0.632816	-0.971087	-0.672691	-0.835447	2.37538	1.419	0.394021	2.32142	2.33677	1.78857	3.61369	2.64205		-0.77801	2.11136	2.88937	3.66279e-05
GAACCTGCTATTTGCTGCATA	TRCN0000177991	Gls2	10.2044	10.1301	10.2021	10.2676	10.3189	10.0669	10.0844	10.1358	10.2699	10.1771	10.552	10.8484	11.6165	10.6155	10.1773	10.3586	10.7589	11.0618	10.1807	10.4907	10.7078	11.8405	10.6064	11.4774		-1.41214	-0.485487	0.0248109	-0.091054	-0.440051	-0.994885	-0.0962976	-0.354844	-0.437906	-1.66343	-0.0543673	-0.629006		-0.490966	-0.583848	-0.0928818	0.814375
GAGCAAGGTTATGACCCATTT	TRCN0000178335	Nudt15	10.9835	10.8489	11.0022	11.0476	11.0729	10.7643	10.6933	10.8579	11.0211	10.8658	11.4035	11.7546	11.4346	11.1695	11.8309	11.9208	12.9564	11.0522	10.2841	10.1397	11.5798	11.5141	9.35776	10.7309		-0.4511	-0.320695	-0.828711	-0.87323	-1.88343	-0.2879	0.409199	0.71823	-0.558653	-0.648377	2.04573	1.02367		-0.618434	0.10231	0.720744	0.145045
GCTACTGTCTTCAGTTGCTTT	TRCN0000178426	Slx1b	9.83355	9.91615	9.91672	9.9625	9.88491	9.87099	9.91884	9.87689	9.95402	9.9128	10.0265	9.96712	8.41432	8.84682	8.81947	9.34138	9.41561	8.81502	9.85034	8.24203	7.5131	7.44875	5.87083	6.66319		1.41924	1.06933	1.09725	0.621112	0.469293	1.05596	0.0685	1.63486	2.44092	2.46406	4.15563	3.30393		1.05173	1.94914	0.897413	0.123071
GAATTGCCAGAGAAGGAATAA	TRCN0000178479	Fam36a	9.86997	9.92691	9.95993	9.98386	9.98916	9.9131	9.96586	9.95017	10.0093	9.93255	10.0359	10.0512	9.19673	9.27795	7.9237	8.60111	9.23082	6.01232	6.46271	5.91373	9.92884	9.38617	5.50826	6.35065		0.673247	0.648962	2.03624	1.38275	0.758337	3.90078	3.50314	4.03644	0.0804552	0.546374	4.52766	3.70058		1.1853	2.63172	1.44642	0.075748
CCTCCAGATTCTGAACATCAA	TRCN0000178660	Fxn	11.5661	11.4698	11.4471	11.3003	11.4278	11.51	11.5795	11.5015	11.4315	11.4263	11.3244	11.2317	9.64373	9.89243	8.99973	8.69274	5.91193	8.06653	11.2875	6.51141	7.3334	8.986	6.99859	7.58277		1.92241	1.57735	2.44737	2.60758	5.51587	3.44349	0.291931	4.99014	4.09811	2.44029	4.32578	3.64896		2.13868	3.59432	1.45564	0.0448249
CGTTTACGTTGGATTCACTGT	TRCN0000178669	Slx1b	11.6775	11.6334	11.7089	11.6743	11.648	11.6356	11.6371	11.6749	11.7067	11.6952	11.7693	11.8167	10.5002	10.5686	10.4502	10.9477	6.71784	8.44792	8.41945	9.22219	9.54024	9.45116	8.24375	9.38882		1.17728	1.06478	1.25868	0.726641	4.93015	3.18771	3.21763	2.45272	2.1665	2.24407	3.52553	2.42785		1.05685	3.01902	1.96217	0.000370697
CGAACTCAATCTCAACCAGAA	TRCN0000179028	Lrrc57	10.5224	10.4391	10.4417	10.456	10.513	10.4016	10.3531	10.4091	10.4247	10.4152	10.4655	10.5236	9.09663	9.00695	8.26769	8.11828	6.83686	7.36256	7.09287	9.84175	9.74857	7.9666	6.55652	6.14198		1.42574	1.43211	2.17406	2.33769	3.67614	3.03906	3.26025	0.567314	0.676086	2.44857	3.90895	4.38157		1.8424	2.74474	0.902346	0.140664
GTTAGCAATACTCCTCGTCAT	TRCN0000179166	Fam20b	10.0998	10.0489	10.1068	10.1124	10.0914	10.1229	10.1189	10.1281	10.0994	10.1469	10.1236	10.1319	10.2385	9.8364	11.0005	10.2196	9.85567	10.0281	10.1162	10.3609	8.95162	10.5477	7.87083	8.12946		-0.138723	0.212461	-0.893627	-0.107197	0.235764	0.0948778	0.00268084	-0.232833	1.14776	-0.400811	2.2528	2.00244		-0.231772	0.637835	0.869607	0.0724478
GCTTTGAACTTCCTAGTCTTT	TRCN0000179601	Athl1	9.99272	10.0299	10.0617	10.077	10.0165	10.0537	9.95779	9.99248	10.0901	10.0355	10.1289	10.163	10.3996	9.98788	10.8885	10.9458	8.51941	8.18801	11.4175	8.11592	8.42012	8.76681	6.54221	8.68333		-0.406885	0.0420096	-0.826767	-0.868832	1.49707	1.86566	-1.45975	1.87656	1.67001	1.26869	3.58667	1.47971		-0.515119	1.47308	1.9882	0.00466027
CATTGATGACCTGGATTCCAA	TRCN0000180138	Ydjc	11.6377	11.5931	11.6373	11.5818	11.5861	11.6493	11.6948	11.6512	11.6565	11.6424	11.5794	11.6643	10.8666	10.5831	10.4127	10.3453	8.90371	9.27115	11.0595	11.3836	9.35531	9.57693	9.56892	10.3026		0.771025	1.01006	1.22463	1.23649	2.68236	2.37811	0.6353	0.267609	2.30119	2.06552	2.01053	1.36169		1.06055	1.71279	0.652234	0.0788334
CAGATGCGTTCTCTTGTTCTT	TRCN0000181035	Ydjc	11.6206	11.5416	11.5946	11.6137	11.6397	11.5582	11.5404	11.5831	11.6022	11.5853	11.6595	11.7494	12.2358	12.3711	12.0896	12.0509	9.82519	10.9465	10.4849	10.4211	11.1784	11.8049	9.75825	11.1264		-0.615203	-0.829596	-0.49501	-0.437262	1.81447	0.611788	1.05556	1.16203	0.423826	-0.219563	1.90122	0.622961		-0.594268	0.921536	1.5158	0.000376965
CGAGACTGTTACTTGCTGGAA	TRCN0000181325	Ssx2ip	12.1773	12.0824	12.1527	12.1594	12.219	12.0188	12.019	12.1168	12.2013	12.1264	12.3185	12.4992	12.5557	12.0654	12.2704	12.5964	13.2279	13.6163	10.154	10.0328	10.2392	11.0635	10.1943	12.7533		-0.37836	0.0169712	-0.117658	-0.437037	-1.00887	-1.59751	1.86498	2.08408	1.96212	1.06296	2.12421	-0.254075		-0.229021	0.779737	1.00876	0.104405
CCAGTTGGTTACCCTTTGTGT	TRCN0000181396	Rwdd3	10.6656	10.7461	10.7939	10.617	10.6864	10.6974	10.715	10.75	10.7513	10.7301	10.7671	10.8174	11.3954	11.9801	11.2753	11.6763	6.66793	8.27725	8.9534	8.38932	10.5052	10.8405	11.7771	12.5039		-0.729835	-1.23394	-0.481364	-1.0593	4.0185	2.42015	1.76155	2.36069	0.246068	-0.110381	-1.01	-1.68654		-0.876108	1.00001	1.87611	0.0302199
GCACCATGAAACCTGAACCTA	TRCN0000181586	Tnrc18	9.30114	9.29985	9.34013	9.3189	9.34951	9.19933	9.26596	9.25859	9.3321	9.28903	9.46883	9.59674	8.93566	8.90552	8.77169	9.21727	5.98087	7.06965	7.7555	8.02577	8.84059	9.28015	7.76802	7.89548		0.365471	0.394327	0.568439	0.101636	3.36863	2.12968	1.51046	1.23282	0.491507	0.00888361	1.70081	1.70126		0.357468	1.51801	1.16054	0.0145793
GCAGTTGTTCACCAACCATAT	TRCN0000181946	Ildr1	10.2485	10.2245	10.2349	10.3362	10.3015	10.2552	10.2023	10.2532	10.3077	10.2895	10.3844	10.4254	10.4479	10.9007	9.14823	9.67037	5.90687	6.35745	5.25121	6.09355	7.84502	6.97867	6.42753	8.30496		-0.199361	-0.676236	1.08672	0.665837	4.39467	3.89771	4.95105	4.15963	2.46272	3.31086	3.95689	2.12045		0.219239	3.65675	3.43751	0.000274428
GTCGAAGTTTCTCCACGAGAA	TRCN0000182287	Fads6	12.2565	12.1362	12.2067	12.2165	12.3599	12.0903	12.0165	12.092	12.2533	12.1131	12.4228	12.651	12.7492	12.5971	12.4695	12.5675	11.0293	10.0078	10.385	11.253	12.6102	12.4947	11.1853	13.151		-0.492761	-0.460923	-0.26281	-0.35102	1.3306	2.08243	1.63149	0.839069	-0.356859	-0.381643	1.23755	-0.499957		-0.391878	0.735335	1.12721	0.0162046
GCCCATATCTCTGTCTACATC	TRCN0000182403	Mzt2	9.81766	9.88673	9.86793	9.90846	9.85762	9.88865	9.82534	9.84469	9.92118	9.89279	9.98402	10.1355	10.3457	9.98353	10.2247	10.1008	8.1572	10.1887	8.46681	8.58741	8.80388	9.11435	7.65066	8.48291		-0.528007	-0.0967942	-0.356807	-0.192364	1.70042	-0.300074	1.35853	1.25728	1.11731	0.778436	2.33336	1.65256		-0.293493	1.23723	1.53072	0.000607918
CATCGATTTATCCAACAACAA	TRCN0000183417	Lrrc57	10.3777	10.4133	10.3574	10.3737	10.4075	10.4444	10.438	10.448	10.3548	10.3411	10.2122	10.174	8.48066	8.5761	8.8605	8.89823	5.27562	6.61878	6.74475	6.90412	6.58729	8.24282	5.67491	7.87687		1.897	1.83724	1.4969	1.47545	5.13189	3.82565	3.69326	3.54384	3.76754	2.09824	4.53729	2.2971		1.67665	3.61185	1.9352	0.000820345
GATTAGACAGTGTCTGAAATA	TRCN0000183541	Mrps27	10.8567	10.9041	10.9176	10.8803	10.866	10.9416	10.988	10.9309	10.9195	10.9741	10.9077	10.898	7.80194	7.82914	6.97402	6.78724	5.47997	7.83995	5.09075	5.66341	9.05408	8.0892	4.11594	6.90041		3.05481	3.07498	3.94356	4.09302	5.38606	3.10169	5.89721	5.26745	1.86546	2.88485	6.79172	3.99759		3.54159	4.399	0.857411	0.226523
GCTTTACTGATTCTTGAAGGA	TRCN0000183707	Fam20b	9.78976	9.84984	9.86651	9.80167	9.79868	9.83422	9.84015	9.81832	9.90268	9.84645	9.89251	9.99124	8.70606	8.73301	8.84937	8.80583	8.98388	5.22913	8.28591	7.02133	7.31435	7.15688	8.23785	8.20403		1.0837	1.11683	1.01715	0.995843	0.814802	4.60509	1.55424	2.79699	2.58833	2.68957	1.65466	1.78721		1.05338	2.31136	1.25798	0.0173517
CCATCGCTCAGAACTTTGTGT	TRCN0000183938	Mrpl14	10.3515	10.3976	10.4358	10.3255	10.4085	10.45	10.4543	10.4274	10.4136	10.425	10.3626	10.3115	10.1706	10.6784	11.433	11.5187	8.29024	8.54994	10.6156	10.2273	9.04833	9.67746	8.57888	8.3614		0.180862	-0.280784	-0.997235	-1.19319	2.11827	1.90007	-0.16132	0.200043	1.36525	0.747564	1.78371	1.95009		-0.572587	1.23796	1.81055	0.00335467
GTTTGACTCCAACAACGTGGT	TRCN0000184351	Mrpl14	10.507	10.4364	10.5649	10.5048	10.6159	10.3658	10.3481	10.4162	10.5664	10.4762	10.7168	10.8655	10.4219	10.5027	10.6068	10.0008	9.52849	9.2172	8.63846	8.99517	8.98078	10.1601	6.22148	7.91386		0.0850317	-0.066268	-0.0419021	0.503974	1.08738	1.14864	1.7096	1.42104	1.58557	0.316081	4.49531	2.95166		0.120209	1.83941	1.7192	0.00704881
GTAACAGTCTAGATGTTGATA	TRCN0000185684	Olfr1156	13.7049	13.787	13.7594	13.7601	13.7133	13.7942	13.8202	13.8082	13.7679	13.8279	13.7227	13.6728	13.8563	13.6497	13.6944	13.656	13.7447	13.7074	13.2563	13.2371	13.4004	13.3463	13.5267	13.2678		-0.151337	0.137277	0.0649676	0.104035	-0.031383	0.0868112	0.563876	0.571182	0.367429	0.481629	0.196076	0.405008		0.0387357	0.330079	0.291343	0.0182598
GCTATCTTCTTTGGTTCCCTT	TRCN0000187524	Olfr972	12.5148	12.5343	12.6053	12.5762	12.5212	12.5931	12.5811	12.5931	12.632	12.5826	12.6515	12.7663	13.1989	13.1605	13.3817	13.2428	14.4064	13.6855	14.8474	14.1417	12.8359	13.1446	13.0484	12.292		-0.684153	-0.626155	-0.776399	-0.666651	-1.88515	-1.09242	-2.26634	-1.5486	-0.203897	-0.562057	-0.396909	0.474317		-0.68834	-0.935131	-0.246792	0.477924
CCACAGACTTCCCAAGAAAGA	TRCN0000189578	Thap7	10.1269	10.1755	10.138	10.053	10.0529	10.1513	10.1856	10.1791	10.1249	10.1798	10.0735	9.99806	10.3614	10.564	8.6418	8.80993	5.50694	4.97279	7.97253	8.37664	7.57133	7.42737	7.28873	8.81433		-0.234431	-0.388503	1.49624	1.24306	4.54595	5.17846	2.21305	1.8025	2.55354	2.75242	2.78476	1.18374		0.52909	2.8768	2.34771	0.0084663
CCCTCACAAACTGCACATTGT	TRCN0000189579	Mrpl30	8.43	8.41997	8.34778	8.25445	8.40528	8.41439	8.36472	8.42079	8.31047	8.36102	8.36315	8.21033	7.92974	8.12364	8.22373	7.01378	4.98087	4.5033	6.93402	5.35094	7.75839	8.26708	6.00903	6.44803		0.500257	0.296336	0.124053	1.24066	3.42441	3.91109	1.43069	3.06985	0.552075	0.0939402	2.35412	1.7623		0.540328	2.07481	1.53448	0.0183749
GAGAAGCTGAAGGCGGAAATA	TRCN0000189843	Rabep1	10.4333	10.2245	10.4529	10.4916	10.6621	10.2125	10.1083	10.2741	10.5043	10.3355	10.9052	11.2547	9.73115	9.18874	8.65616	8.63731	6.91193	7.63786	8.93815	8.48372	7.21054	7.34687	6.98807	9.72833		0.702115	1.03574	1.79674	1.85425	3.75013	2.57466	1.17014	1.79042	3.29377	2.98861	3.91711	1.52636		1.34721	2.6264	1.27919	0.0207958
GCCTACTTTGCACCTCGTTTA	TRCN0000189921	Mrpl21	10.6728	10.6449	10.6622	10.708	10.7585	10.6036	10.561	10.6013	10.7021	10.6165	10.8008	10.8838	10.6747	10.6694	10.3068	10.2568	10.4396	10.6714	10.5764	9.67664	7.98011	10.1107	8.64955	10.9386		-0.00191813	-0.0244705	0.355398	0.451206	0.318827	-0.0678702	-0.0153289	0.924653	2.72199	0.505776	2.15121	-0.0548443		0.195054	0.810552	0.615498	0.158348
GCTTAGTGAGTGAGACGGAAT	TRCN0000190015	Rabep1	10.1636	10.2188	10.2519	10.2037	10.1808	10.1906	10.1562	10.1854	10.2569	10.1461	10.2321	10.3073	8.22603	8.30087	7.28724	7.90878	5.43855	5.66085	5.96676	6.43785	7.16636	6.56363	5.84775	5.73661		1.93753	1.91792	2.96465	2.29487	4.74224	4.52972	4.18941	3.74758	3.09052	3.58246	4.3844	4.57066		2.27874	4.10462	1.82588	0.000660677
GATGCAGAGAGCCATAAGAAA	TRCN0000190737	2310033P09Rik	9.98355	10.1035	10.0499	10.0716	10.0482	10.049	10.0884	10.0202	10.0593	10.0397	10.0991	10.1473	11.123	10.754	11.3104	11.1063	9.84051	10.6134	9.0801	8.94452	9.48829	10.2065	6.14779	10.6516		-1.13941	-0.650533	-1.26049	-1.03462	0.207716	-0.564437	1.00827	1.07572	0.570997	-0.166799	3.95132	-0.504242		-1.02126	0.697319	1.71858	0.0123038
GACAAACTCAGGGCAGCATTA	TRCN0000190869	Mrps26	10.7649	10.681	10.7173	10.7961	10.8772	10.6293	10.5733	10.6717	10.7602	10.681	10.9731	11.1409	10.5643	10.5689	9.45176	10.169	8.46114	9.72916	10.0499	8.16636	8.66455	8.98	7.69229	8.59422		0.20063	0.112166	1.26555	0.62705	2.41604	0.900114	0.523482	2.50535	2.09564	1.70103	3.28083	2.54672		0.551348	1.99615	1.4448	0.00649422
CCTGGATACATTTGAGATATT	TRCN0000191136	Gsdmc	14.0961	14.0469	14.0027	13.8816	13.9396	14.1288	14.1683	14.132	13.9446	14.042	13.8068	13.7104	14.0509	14.2645	14.247	14.3581	14.0777	14.2656	14.7136	14.3802	13.3905	13.8859	14.1557	14.3922		0.0451965	-0.217664	-0.24434	-0.476536	-0.138126	-0.136848	-0.545319	-0.248189	0.554149	0.15609	-0.348909	-0.681804		-0.223336	-0.17362	0.0497164	0.782066
CCAAGGATGATGACTTTGAAT	TRCN0000191157	2810021B07Rik	11.5274	11.5593	11.4807	11.4331	11.4471	11.5966	11.6033	11.5784	11.4995	11.5513	11.3431	11.3406	10.7545	10.4727	10.9716	10.3045	9.85993	9.56331	10.3766	9.72291	9.54751	9.44923	10.626	9.628		0.772906	1.08651	0.509139	1.12867	1.58719	2.03329	1.22672	1.85545	1.95204	2.10206	0.717111	1.71256		0.874309	1.6483	0.773995	0.00639305
CCCAGGTTTCTATGATATGAT	TRCN0000191166	Slain2	11.5841	11.5936	11.5508	11.4694	11.5386	11.6324	11.6838	11.6006	11.5121	11.5942	11.4408	11.2386	11.3324	11.5061	11.9982	11.6089	10.8094	10.9066	11.5464	12.3337	10.9007	10.9041	10.3292	11.6577		0.251689	0.0874485	-0.447484	-0.139504	0.729263	0.725812	0.137352	-0.733057	0.611354	0.69005	1.11153	-0.419042		-0.0619626	0.356658	0.418621	0.154831
CCACATAAGCAAGTTACAGAA	TRCN0000191231	Oxnad1	12.9691	12.9804	12.945	12.9135	12.8837	13.0581	13.0231	13.0112	12.9582	13.0119	12.7958	12.7987	12.4542	12.6493	12.2407	11.9681	11.454	12.1693	11.7861	11.9516	11.8088	12.0085	11.577	13.1508		0.514939	0.331066	0.704291	0.945398	1.42966	0.888802	1.23703	1.05953	1.14941	1.00343	1.21878	-0.352074		0.623923	0.954321	0.330397	0.190966
GATGGCTATAACTGAGTATAT	TRCN0000191846	Mrpl10	10.317	10.2934	10.3283	10.2601	10.2758	10.376	10.3853	10.358	10.3147	10.3452	10.276	10.278	8.29402	8.58953	8.34993	8.89727	6.91696	7.67938	7.07582	7.10757	7.84059	7.49431	6.84386	6.8453		2.02298	1.70383	1.9784	1.36282	3.35888	2.69662	3.30945	3.2504	2.47406	2.85086	3.4321	3.43275		1.76701	3.10064	1.33363	0.0002322
GAGAAGTACAAGCCGATCATA	TRCN0000192151	1810026J23Rik	10.4315	10.3322	10.431	10.4571	10.5573	10.3308	10.2787	10.3704	10.4227	10.3538	10.5903	10.6959	10.2968	10.5814	9.94908	10.1058	6.65894	8.34332	9.11442	9.51509	9.38656	9.13607	8.48974	10.3197		0.134732	-0.249148	0.48191	0.351227	3.89832	1.98748	1.16432	0.8553	1.03616	1.21777	2.10056	0.376144		0.17968	1.57951	1.39983	0.00863778
CGACTACTTCGCAAACAGAAT	TRCN0000192395	Mrpl54	10.1462	10.1284	10.1071	10.1124	10.1468	10.1362	10.0772	10.1722	10.1136	10.1204	10.1272	10.1609	9.73862	10.0733	9.04694	9.22573	8.25787	8.84635	6.36786	8.36034	9.11407	9.0774	6.97747	7.44971		0.407546	0.0551239	1.0602	0.886654	1.88891	1.28988	3.70939	1.81187	0.999554	1.04296	3.14977	2.71123		0.602382	2.07545	1.47306	0.00604486
GCTGAAAGTGGTTAAACACTT	TRCN0000192587	Mrpl30	12.4871	12.5775	12.5276	12.5476	12.4969	12.5441	12.4903	12.5129	12.5461	12.5273	12.5333	12.6051	9.92021	10.1527	10.3439	10.261	9.24391	8.27183	7.30889	7.04192	9.70046	10.727	6.96322	6.98859		2.56685	2.4248	2.18368	2.28663	3.25302	4.27232	5.18139	5.47099	2.84566	1.80027	5.5701	5.61646		2.36549	4.25128	1.88579	0.00798044
GAAAGAGAAGATGGCCTTTGA	TRCN0000192589	Spata24	10.3448	10.328	10.3296	10.3728	10.4204	10.2884	10.2767	10.3614	10.323	10.3627	10.3786	10.4351	10.4278	10.2583	9.91084	10.1762	8.67983	9.09978	10.0209	9.22412	8.0419	8.87913	9.40399	9.65484		-0.083068	0.0697508	0.418781	0.196633	1.74056	1.18861	0.255726	1.1373	2.28108	1.48356	0.974665	0.780266		0.150524	1.23022	1.0797	0.00139787
GCGGAAACACAAGATCTTCAT	TRCN0000192693	Mrpl10	9.79923	9.81096	9.83095	9.82469	9.81127	9.73174	9.68088	9.74637	9.80163	9.74833	9.93843	10.0322	9.0694	9.32343	9.85265	9.06698	7.10078	6.85815	6.26632	6.01837	8.06742	8.93528	5.21548	6.68619		0.72983	0.48753	-0.0216998	0.757706	2.71049	2.8736	3.41456	3.72801	1.73421	0.81305	4.72295	3.34601		0.488342	2.91786	2.42952	0.000526404
GAAAGAGCAAGAAGTGCTCAA	TRCN0000192903	Mrps26	8.63511	8.58503	8.68447	8.58014	8.73883	8.57343	8.50894	8.57482	8.75988	8.62087	8.79314	8.88546	11.7961	7.93363	8.34807	8.38462	5.16145	5.41757	6.25878	6.13795	6.58376	6.57428	3.83215	6.21889		-3.16098	0.651405	0.336402	0.195517	3.57739	3.15586	2.25016	2.43688	2.17612	2.04659	4.96099	2.66657		-0.494414	2.90882	3.40323	0.0245087
GCTACATTAACACAAGCTGAA	TRCN0000192992	8430406I07Rik	10.5838	10.671	10.6478	10.6233	10.5975	10.6757	10.6618	10.6694	10.6147	10.6563	10.5141	10.5377	10.6231	10.6985	10.3005	10.5058	8.33796	8.88679	10.2896	10.6771	10.9392	9.27798	8.61579	7.67617		-0.0393659	-0.0274189	0.347257	0.117523	2.25959	1.78891	0.372239	-0.00774573	-0.324557	1.37836	1.89836	2.8615		0.0994987	1.27833	1.17883	0.0226503
GCTATGAGATAGGGACAGTAA	TRCN0000192996	Oxnad1	10.599	10.6372	10.6726	10.6402	10.5651	10.6633	10.6941	10.7005	10.66	10.6828	10.6629	10.686	9.34433	9.10839	8.19089	8.74612	6.85534	9.50792	8.79965	8.77391	9.95504	10.7493	10.1599	10.3084		1.25462	1.52886	2.48166	1.89411	3.70974	1.15538	1.89447	1.92654	0.704916	-0.0665429	0.502919	0.377572		1.78981	1.27562	-0.514188	0.331583
GTATGAGATGGTGAAGAAGAT	TRCN0000192997	Lemd2	10.2778	10.3752	10.3765	10.3383	10.327	10.4089	10.3883	10.3751	10.3577	10.3776	10.3142	10.3098	10.1437	10.5773	11.0963	10.4654	9.41205	10.2119	9.21566	9.55657	9.67039	10.0038	7.98455	7.97699		0.134138	-0.202065	-0.71979	-0.127154	0.914957	0.197028	1.17262	0.818552	0.687288	0.373817	2.32964	2.33282		-0.228718	1.10334	1.33206	0.00286316
GCAGACATACTAAACCACATA	TRCN0000193449	Setd6	10.0202	10.1211	10.0269	10.095	10.0029	10.096	10.164	10.1448	10.1117	10.1164	10.0509	10.0648	9.86849	10.1585	9.00269	9.32429	6.30664	7.05711	6.64714	7.62103	10.5131	9.76913	7.53018	9.04582		0.151683	-0.037363	1.02418	0.770666	3.69624	3.03892	3.51681	2.52377	-0.401404	0.347273	2.52068	1.01896		0.477292	2.03266	1.55537	0.0271373
GACTGGATTCAATTCTTTCTT	TRCN0000193464	Gfral	11.9885	11.9506	11.9638	12.0331	12.0361	11.9397	11.9703	11.9456	11.9346	11.9546	11.9722	11.8672	12.1214	12.1052	12.2751	12.244	12.0673	12.9242	12.6546	12.2279	11.2229	11.665	11.2349	11.0974		-0.132891	-0.15462	-0.311276	-0.210934	-0.0311656	-0.984517	-0.684343	-0.28231	0.7117	0.289596	0.737329	0.769856		-0.202431	0.0657683	0.268199	0.303899
CTATGAGAGCTACAAGAAGAA	TRCN0000193919	1810055G02Rik	10.7948	10.8427	10.7865	10.7267	10.7408	10.8924	10.8812	10.8641	10.8013	10.8369	10.6678	10.6573	11.2358	11.4383	10.8843	10.8941	7.70334	8.40525	9.47333	9.13931	9.50332	9.36487	6.4885	8.80385		-0.440948	-0.595603	-0.0978358	-0.167415	3.03742	2.48713	1.40792	1.72475	1.29801	1.472	4.17933	1.85345		-0.325451	2.1825	2.50795	0.000120132
GACTTGTAAAGCCACTGGCAA	TRCN0000194648	Lass5	9.10064	8.98671	9.12564	9.0925	9.2191	8.92335	8.83889	9.02526	9.08205	8.95487	9.34692	9.66524	9.10032	8.56254	9.41802	8.5579	9.32854	8.0188	8.00554	8.55912	8.97405	9.08859	8.57186	9.43663		0.00032053	0.424173	-0.292378	0.534604	-0.109435	0.904545	0.833355	0.466144	0.107999	-0.133712	0.775059	0.228606		0.16668	0.38407	0.21739	0.401472
CCAGTTTCTCTCCCTCTATGT	TRCN0000195971	Mrps27	10.3066	10.3106	10.3546	10.2434	10.2913	10.328	10.3316	10.3334	10.2999	10.3847	10.3679	10.3846	10.1557	10.7217	9.8124	9.6933	7.33325	9.27995	7.27754	8.58741	8.03287	9.42884	5.55652	6.95112		0.150913	-0.411117	0.542221	0.550121	2.95802	1.0481	3.05411	1.74595	2.26708	0.955871	4.81136	3.43344		0.208035	2.53424	2.32621	0.0012253
CAAACTGGACTTGTCTTCATT	TRCN0000197534	Fxn	10.1515	10.1514	10.1619	10.1449	10.1475	10.1787	10.1675	10.1622	10.1956	10.2235	10.1708	10.1807	8.26608	8.31017	8.13804	7.42793	3.98087	5.41757	6.9458	7.4334	8.11346	7.62977	7.83997	8.45891		1.88538	1.84119	2.02391	2.71699	6.16663	4.76113	3.22166	2.72882	2.08211	2.59377	2.33085	1.72175		2.11687	3.20084	1.08397	0.091699
GAACATAGACTGTGAAGTATT	TRCN0000197955	Podxl2	12.5553	12.6078	12.5867	12.6294	12.5725	12.642	12.6246	12.6588	12.6077	12.6371	12.5656	12.5914	13.2982	13.3166	12.7892	12.5612	13.119	12.9402	12.3401	12.6202	12.2465	12.7111	12.7135	13.2826		-0.742877	-0.708783	-0.202497	0.0681941	-0.546525	-0.298159	0.284444	0.0386715	0.361235	-0.0739344	-0.147859	-0.691178		-0.396491	-0.134163	0.262328	0.31366
CCATCAGTTCATCTCCAAGTA	TRCN0000197996	Tbc1d5	10.1069	10.0844	10.0722	10.0904	10.0513	10.1466	10.1841	10.1318	10.0948	10.1204	10.0162	10.0051	9.42993	9.26903	10.4548	10.4494	6.45596	7.50099	8.48951	8.22412	7.47548	7.99593	8.33373	6.99781		0.676992	0.81537	-0.382604	-0.359042	3.59538	2.64558	1.69458	1.9077	2.61928	2.12443	1.68251	3.0073		0.187679	2.4096	2.22192	0.00121924
CAACATCAAGGAGTACCTGAT	TRCN0000198092	Rwdd3	10.197	10.218	10.2108	10.1919	10.1482	10.2182	10.2269	10.2365	10.1981	10.2306	10.1387	10.1767	10.0556	10.3102	10.5314	10.4858	8.2419	9.77824	9.0356	9.37895	9.71667	12.8206	9.54281	9.11311		0.141374	-0.0921456	-0.320546	-0.293858	1.90633	0.439946	1.19132	0.857585	0.481385	-2.58996	0.595861	1.06363		-0.141294	0.493263	0.634557	0.227392
CATCATGCCAACAAGCAACTT	TRCN0000198217	Gls2	10.2786	10.3149	10.2923	10.2941	10.2935	10.3437	10.3252	10.3412	10.3265	10.2915	10.166	10.167	9.95008	10.4984	9.26769	9.61991	9.12329	8.44431	7.5701	9.32537	7.50005	8.33648	8.13196	7.56428		0.328496	-0.1835	1.02464	0.674167	1.17018	1.89935	2.75507	1.01579	2.82647	1.95506	2.03409	2.60272		0.460952	2.03234	1.57139	0.00216831
GACTGGACTTGGACATTTCTT	TRCN0000198552	Fam36a	10.4014	10.322	10.3891	10.45	10.504	10.3148	10.3339	10.3564	10.5113	10.3333	10.6926	10.884	10.4713	10.5328	9.49359	9.85773	8.53341	8.27183	8.42871	8.65293	10.3215	10.6938	7.57068	10.626		-0.0699078	-0.210813	0.895527	0.592227	1.97054	2.04293	1.90517	1.70345	0.189742	-0.360541	3.12194	0.258085		0.301758	1.35392	1.05216	0.0602049
CCATTATACACTCACCGTCAA	TRCN0000198738	Fads6	11.2396	11.2075	11.1765	11.0763	11.1576	11.2817	11.2328	11.2258	11.1376	11.2304	10.9952	10.9705	10.3552	10.3866	10.7977	10.5806	7.44902	8.63786	8.43958	8.59638	9.40619	9.73158	8.65842	9.05579		0.884387	0.820893	0.378815	0.495691	3.70862	2.64385	2.79321	2.62944	1.73138	1.49878	2.33678	1.91467		0.644947	2.40709	1.76215	0.000105548
GAGAAGCTTGCAAGACGAGTT	TRCN0000198964	Mrpl52	8.56226	8.42262	8.60249	8.63421	8.82497	8.25313	8.24101	8.40033	8.59692	8.53031	9.08737	9.46096	7.60633	7.36586	7.43301	6.84829	5.92698	6.1721	5.20492	4.34148	7.98145	7.51103	5.61237	4.93201		0.955937	1.05676	1.16947	1.78592	2.89799	2.08103	3.03609	4.05885	0.615467	1.01928	3.475	4.52895		1.24202	2.71408	1.47206	0.0211841
GAAGCTTGCAAGACGAGTTGT	TRCN0000198965	Mrpl52	9.21376	9.1002	9.28492	9.3189	9.47605	9.06694	9.00526	9.12029	9.3354	9.15052	9.7272	10.0535	9.19129	9.36084	9.00564	8.32429	10.8175	9.90834	7.67712	7.53234	8.55158	8.89408	6.68363	7.60255		0.0224733	-0.26064	0.27928	0.99461	-1.34142	-0.841399	1.32813	1.58795	0.78382	0.25644	3.04357	2.45095		0.258931	0.908506	0.649576	0.305878
CCACAGCATCTCTCTCTAGTA	TRCN0000200080	Ndrg3	10.503	10.5431	10.4828	10.4486	10.4142	10.5481	10.5656	10.5527	10.4868	10.556	10.426	10.3999	10.5637	10.858	9.63838	9.92304	10.3608	7.64835	8.06073	8.10058	8.93993	9.68771	9.22671	11.0044		-0.0606915	-0.31489	0.844448	0.525542	0.0533965	2.89976	2.50486	2.45216	1.54687	0.86828	1.19934	-0.604509		0.248602	1.36502	1.11642	0.0543649
CGCACAGTTACAGAGCTCATT	TRCN0000200175	Rc3h1	10.3608	10.3245	10.3437	10.3691	10.4212	10.2952	10.2618	10.2948	10.3526	10.307	10.3983	10.5199	9.60298	9.21497	9.35504	9.12734	4.95173	6.43222	8.42366	6.9453	7.83466	9.00776	6.03651	5.28815		0.757869	1.1095	0.988669	1.24171	5.46947	3.86295	1.83809	3.3495	2.51794	1.29924	4.36183	5.23176		1.02444	3.49135	2.46691	0.00240231
GATTTAGACACCAAGAGTAAA	TRCN0000200691	Mtif3	10.2356	10.3088	10.3144	10.305	10.2566	10.3607	10.3381	10.3819	10.2995	10.3529	10.2665	10.2879	9.53475	9.67029	9.28384	8.09496	5.65292	6.08827	8.37571	8.97467	7.66622	9.25003	4.73485	7.02737		0.70086	0.638531	1.03051	2.21007	4.60373	4.27246	1.96239	1.40725	2.63331	1.10285	5.53162	3.26055		1.14499	3.09677	1.95178	0.0159088
GTCTAATGAGTTGGAAAGTTA	TRCN0000200745	2810021B07Rik	10.7996	10.8587	10.8656	10.8358	10.8219	10.8806	10.913	10.9113	10.8805	10.8737	10.8266	10.8567	10.0477	9.90207	9.61459	10.1249	6.34451	8.16188	7.97942	7.46424	9.38555	10.3388	8.86988	9.86527		0.751887	0.956593	1.25103	0.710968	4.47743	2.71872	2.93362	3.44705	1.495	0.534834	1.95675	0.99148		0.91762	2.31936	1.40174	0.0200827
GAGGACACAGAATTACCATTT	TRCN0000200887	Mia2	10.2769	10.2358	10.2799	10.2852	10.3057	10.1044	10.1752	10.1944	10.2957	10.218	10.4417	10.5692	9.08335	8.74763	9.70894	9.45501	7.16145	6.76093	6.70926	6.76598	9.48545	9.0724	7.23933	8.61982		1.19354	1.48819	0.57093	0.830184	3.14423	3.34348	3.46592	3.42839	0.810267	1.14561	3.20235	1.94936		1.02071	2.5612	1.54049	0.00572623
CTCTATCCGGGAATATGCTAA	TRCN0000200953	Mrpl54	9.60649	9.63154	9.62405	9.56047	9.63966	9.72757	9.73212	9.67704	9.63021	9.64225	9.60214	9.58111	9.48995	9.38414	9.3156	10.0402	9.46243	9.37335	9.14743	9.2099	7.35635	9.15629	9.0842	9.28627		0.116538	0.247396	0.308455	-0.479723	0.177233	0.35422	0.584689	0.467139	2.27386	0.485962	0.517945	0.294832		0.0481665	0.644486	0.596319	0.0740119
CAGAAGAGAATGGGAGAATTT	TRCN0000200989	Ccdc99	10.5412	10.5017	10.5156	10.4543	10.4814	10.5305	10.5732	10.5814	10.4937	10.5742	10.3855	10.3403	8.5324	8.94038	8.9061	9.01378	5.38868	6.38783	7.67004	8.4053	7.02768	7.71724	6.88224	7.37915		2.00884	1.56135	1.60945	1.44055	5.09277	4.14268	2.90312	2.17613	3.46597	2.857	3.50328	2.96111		1.65505	3.38776	1.73271	0.00071077
GCCATGATAGAACAGAAGAAT	TRCN0000201236	Ccdc99	10.6235	10.7645	10.6885	10.6859	10.6355	10.7875	10.7156	10.7713	10.7021	10.7136	10.6574	10.6527	10.7703	11.0694	10.4531	11.0554	8.90371	8.44431	9.52331	7.73199	9.72912	10.4483	8.14148	9.87656		-0.146756	-0.304876	0.235436	-0.369503	1.73182	2.34319	1.19233	3.0393	0.972988	0.265313	2.51595	0.776103		-0.146425	1.60462	1.75105	0.0010481
GCAGAGGACCTGATTCTAATT	TRCN0000201705	Mrpl21	9.98503	10.0663	10.0996	10.1251	9.95745	10.1022	10.0175	10.0498	10.1541	10.1336	10.2026	10.3343	9.02674	9.12627	8.76404	9.31206	5.55941	6.54433	5.21274	7.10757	8.77784	8.20563	6.05006	6.44128		0.958291	0.940045	1.33557	0.813079	4.39804	3.55783	4.80477	2.9422	1.37629	1.92793	4.15253	3.89297		1.01175	3.38157	2.36982	0.000710125
GCAGCTGGAGAAAGAGAAGAT	TRCN0000201737	Spata24	9.8434	9.87663	9.91912	9.90206	9.93264	9.84041	9.78649	9.79969	9.91099	9.85088	10.0464	10.1471	10.1427	9.74677	9.94355	9.90591	8.8168	8.57875	9.27801	8.50718	9.6733	9.58529	7.88224	7.53133		-0.299287	0.129859	-0.0244246	-0.00384525	1.11585	1.26166	0.508482	1.29251	0.237692	0.265592	2.16412	2.61575		-0.0494244	1.18271	1.23213	0.00461511
GCTGTTCGAGGAGAAGTACAA	TRCN0000201867	1810026J23Rik	10.1251	10.1418	10.1436	10.2108	10.2003	10.1249	10.0984	10.0982	10.1965	10.1093	10.2822	10.3477	8.227	7.94561	8.15516	7.9959	7.24791	8.78491	9.2979	8.36502	9.89397	9.76178	7.62147	7.65156		1.89807	2.19614	1.98845	2.21488	2.9524	1.33995	0.800461	1.73321	0.302502	0.347537	2.66069	2.69611		2.07439	1.60411	-0.47028	0.263069
CCGAACACTGAGCTCCATAAA	TRCN0000201897	Rabgap1	10.496	10.4485	10.4283	10.4175	10.4077	10.4185	10.4155	10.3889	10.464	10.4303	10.3891	10.4328	9.79087	9.75318	9.6539	9.66473	9.42271	6.61878	8.67429	7.74998	9.98581	9.86222	9.31772	9.76659		0.705112	0.695323	0.774445	0.752791	0.984998	3.79975	1.74117	2.63897	0.478189	0.568056	1.07136	0.666199		0.731918	1.49359	0.761668	0.110072
CGCACTTGGTTACAAGAACGT	TRCN0000201947	2310033P09Rik	10.2483	10.1927	10.2217	10.2993	10.3423	10.0493	10.042	10.1782	10.261	10.1475	10.439	10.5598	11.0056	10.8322	10.3347	10.8715	7.92823	7.78586	8.76017	8.55708	8.51125	9.20449	7.52048	6.52018		-0.757369	-0.63951	-0.113055	-0.572259	2.4141	2.26348	1.2818	1.62116	1.74976	0.942988	2.91856	4.03964		-0.520548	2.15394	2.67448	6.16912e-05
CGCTAGGGTTTGGGTATCTAT	TRCN0000202040	8430406I07Rik	9.20003	9.13047	9.24781	9.15639	9.26404	9.12517	9.1197	9.14141	9.2662	9.10789	9.31964	9.53749	8.39381	8.16907	7.2814	6.8876	6.5944	5.78014	4.97598	8.38242	6.25118	6.76913	7.75567	7.81693		0.806229	0.961397	1.96641	2.26878	2.66964	3.34503	4.14372	0.75899	3.01502	2.33876	1.56397	1.72055		1.5007	2.44446	0.943756	0.108314
GCTGCACGAACTGTACAACTT	TRCN0000202490	Lemd2	9.83783	9.91097	9.9536	9.89926	9.96076	9.84041	9.81229	9.86984	9.94568	9.86105	9.98764	10.0725	8.51351	7.99402	8.13804	7.73215	5.95663	5.16042	6.49514	7.09918	6.9337	5.92422	5.63951	7.6733		1.32431	1.91695	1.81556	2.16711	4.00414	4.68	3.31715	2.77066	3.01198	3.93683	4.34813	2.39921		1.80598	3.55851	1.75253	0.00038854
GCCGGGTGAAATGCTATAAAT	TRCN0000220443	Ptprk	9.94169	10.0351	10.0067	9.95015	10.0053	9.92881	9.90392	9.87058	9.9324	9.84029	10.1542	10.0245	8.22893	8.27022	8.36565	8.45173	5.59126	6.41266	7.4871	7.61907	11.1269	9.06361	8.08831	9.1451		1.71276	1.76487	1.64107	1.49841	4.41403	3.51615	2.41682	2.25151	-1.19447	0.776679	2.06588	0.879409		1.65428	1.89075	0.236473	0.713328
GCCCAGACTAAGAACATAAAT	TRCN0000220444	Ptprk	10.3078	10.3515	10.2764	10.3708	10.3512	10.3513	10.352	10.3182	10.3319	10.3238	10.3262	10.2935	9.89245	9.43551	9.89277	10.1187	6.63164	7.12178	8.77543	9.03753	8.63585	7.98267	7.70091	7.96411		0.415336	0.915962	0.383632	0.252096	3.71955	3.22949	1.57659	1.28064	1.69605	2.34109	2.62532	2.32937		0.491757	2.34976	1.858	0.000260929
TGAAGACTCCAGCTCTCATTG	TRCN0000305329	Abhd14b	6.26399	5.91615	6.14858	6.35038	6.52051	5.89833	6.29049	6.20178	5.93212	6.05335	6.15258	5.23452	2.20656	2.6721	2.83748	2.93341	0	2.86176	0	0	5.6528	4.44101	1.76802	-0.296808		4.05743	3.24405	3.3111	3.41697	6.52051	3.03657	6.29049	6.20178	0.279322	1.61234	4.38456	5.53132		3.50739	4.23211	0.724726	0.422276
TGCTGCATGGTATCCGCTTCT	TRCN0000305330	Abhd14b	9.02191	8.70622	8.89879	8.868	9.14726	8.46838	8.66362	8.69227	8.65022	8.66178	8.75377	8.18205	5.4709	4.52009	4.7158	4.30264	1.65894	2.2179	3.53934	2.61711	3.30365	5.0516	2.95244	5.33255		3.55101	4.18613	4.18299	4.56536	7.48832	6.25047	5.12429	6.07515	5.34657	3.61018	5.80132	2.8495		4.12137	5.31823	1.19685	0.0637848
GACCTGCTGCAGAACCTTATA	TRCN0000305648	Asap1	7.67462	7.3701	7.53712	7.69191	7.82315	7.12073	7.44028	7.28897	7.33622	7.35144	7.54293	6.73409	5.77046	5.00552	4.7273	3.8403	-0.662983	4.40773	3.17321	2.73741	4.55519	5.07178	3.55652	3.19504		1.90416	2.36458	2.80982	3.85161	8.48613	2.713	4.26708	4.55156	2.78103	2.27966	3.98642	3.53904		2.73254	4.07549	1.34295	0.127257
CAGACCTGCCTTACGACTATG	TRCN0000305732	Sod2	7.47966	7.21688	7.42594	7.43701	7.67908	6.97352	7.2132	7.21824	7.21965	7.2457	7.43481	6.54932	8.24046	3.72868	4.98842	5.11663	0.0739824	3.99926	2.53934	1.26348	2.4349	1.80874	0.630516	3.19504		-0.760801	3.4882	2.43752	2.32038	7.6051	2.97426	4.67386	5.95476	4.78475	5.43696	6.80429	3.35427		1.87132	5.19853	3.32721	0.0245832
GCTTACTACCTTCAGTATAAA	TRCN0000311411	Sod2	11.2791	11.1408	11.2051	11.2358	11.339	11.0681	11.2391	11.1829	10.9596	11.118	10.8969	10.0009	7.73693	8.09702	7.97282	6.60111	5.94681	5.43707	6.98514	5.20208	8.50939	6.14978	7.42493	7.97815		3.54213	3.04373	3.23228	4.63469	5.39223	5.63102	4.25397	5.98081	2.45026	4.96818	3.472	2.02279		3.61321	4.27141	0.658197	0.324669
ACCATCTCGTGCTCCTATAAA	TRCN0000328334	Rai1	7.32897	7.16723	7.26514	7.38749	7.5235	7.08466	7.29598	7.08354	7.09087	7.07914	6.98908	6.09274	2.20656	3.52009	3.75002	2.74076	0.337017	1.67733	1.26632	1.41548	3.97742	3.11131	0	0		5.12241	3.64714	3.51512	4.64673	7.18648	5.40732	6.02966	5.66806	3.11344	3.96783	6.98908	6.09274		4.23285	5.55683	1.32398	0.0628795
CTTTGAACTTCCTAGTCTTTG	TRCN0000328754	Athl1	8.67682	8.41865	8.53533	8.48489	8.72396	8.18297	8.41272	8.45988	8.21338	8.27845	8.18695	7.38776	6.86539	6.60944	6.00269	6.33713	4.07398	1.67733	4.23594	3.84844	-2.08867	5.65674	0.630516	2.61008		1.81143	1.80921	2.53265	2.14776	4.64998	6.50564	4.17678	4.61144	10.3021	2.62171	7.55643	4.77768		2.07526	5.65021	3.57495	0.00370126
AGAAAGAAGTTCTCGTTTATG	TRCN0000341671	Fam102b	9.10447	8.87034	8.98826	8.92827	9.26628	8.64595	8.8955	8.88575	8.68943	8.84098	8.70278	7.88093	7.54873	7.09433	6.79714	7.16223	7.08297	6.97279	5.71478	7.15964	4.9988	7.41952	6.51804	6.57664		1.55574	1.77601	2.19111	1.76605	2.1833	1.67316	3.18072	1.72611	3.69063	1.42146	2.18474	1.30429		1.82223	2.17055	0.348324	0.317444
GCTGGGCTTTGCAGATCTAAA	TRCN0000341672	Fam102b	9.14165	8.86937	9.04454	8.99367	9.30372	8.54527	8.72195	8.80632	8.75373	8.70758	8.95846	8.13523	7.32324	8.00552	7.52316	8.11828	5.51361	5.08827	5.91017	7.95464	5.18746	6.50548	4.47851	3.98859		1.81841	0.863854	1.52138	0.875386	3.79011	3.45701	2.81177	0.85168	3.56627	2.2021	4.47995	4.14664		1.26976	3.16319	1.89343	0.00284327
GCTACCATACGAGCAATTATA	TRCN0000341884	Ythdc2	10.308	10.1954	10.253	10.3129	10.4077	10.0775	10.2891	10.1592	9.97189	10.1139	9.93918	9.09421	10.2829	8.03947	8.3094	7.94277	5.76328	5.94582	6.2436	7.21249	10.8197	9.74617	9.07014	9.19504		0.0251138	2.1559	1.94358	2.37012	4.64443	4.13164	4.04551	2.94668	-0.84784	0.367689	0.869039	-0.100833		1.62368	2.00704	0.383362	0.691815
ACCTAGTACCAGCCAATATAA	TRCN0000346185	Cep350	12.0026	11.7423	11.9165	11.9093	11.9845	11.607	11.9804	11.8391	11.6506	11.7942	11.602	10.6447	10.5306	10.4897	10.161	10.1817	7.4438	9.00988	9.17671	9.04192	7.65449	5.90185	4.35298	6.90041		1.47199	1.25258	1.75547	1.72753	4.54069	2.59709	2.80366	2.79717	3.99615	5.89231	7.24904	3.74425		1.55189	4.20255	2.65065	0.00243444
GAACAGTACCAACCCTATAAT	TRCN0000346186	Cep350	10.9242	10.723	10.8873	10.8659	11.0018	10.5688	10.8294	10.7703	10.6329	10.7209	10.6288	9.79559	8.18683	7.98098	8.64256	9.78099	5.40311	6.37272	7.27941	7.98077	7.85385	7.10398	8.07843	8.70952		2.73735	2.74198	2.24474	1.08496	5.59871	4.19606	3.55004	2.78952	2.77905	3.61688	2.55035	1.08607		2.20226	3.27083	1.06858	0.11161
GCTGACATACTTAGGATTAAG	TRCN0000346746	Slc39a9	9.94566	9.74375	9.78138	9.80167	9.96929	9.52619	9.76056	9.7115	9.47432	9.60199	9.46521	8.724	7.79022	8.18306	7.42598	7.26731	2.14437	0.53983	5.33957	6.81807	5.48119	5.984	4.61237	4.27305		2.15544	1.5607	2.3554	2.53436	7.82492	8.98636	4.42099	2.89343	3.99314	3.61799	4.85284	4.45095		2.15148	5.13008	2.9786	0.00513904
AGGCTGTGTCTTCCGATATAG	TRCN0000346780	Katnb1	9.23785	8.92551	9.07986	9.08334	9.55927	8.55189	8.64364	8.73865	8.79805	8.76141	9.2801	8.76271	7.82766	6.94412	6.63876	6.706	9.04438	7.84178	6.34669	6.62493	4.98815	5.0414	5.47851	6.51055		1.41019	1.98139	2.44109	2.37735	0.514891	0.710109	2.29695	2.11372	3.8099	3.72001	3.80158	2.25216		2.05251	2.40241	0.34991	0.519877
ACACGATCTCTGTATCCAAAT	TRCN0000348086	Arl4c	10.9234	10.7403	10.7941	10.8817	11.0459	10.5873	10.8249	10.7603	10.6152	10.6787	10.5343	9.68909	7.60633	8.37142	7.24388	7.56033	8.114	6.52168	5.69258	5.39733	4.8302	4.95714	4.47851	6.12946		3.31707	2.36888	3.55024	3.32135	2.93189	4.06563	5.13228	5.36296	5.78499	5.7216	6.0558	3.55964		3.13939	4.82685	1.68746	0.00602759
GCTAGTCAGGCTCTTCGATAT	TRCN0000350676	Ick	9.66577	9.44883	9.59522	9.58863	9.83614	9.27673	9.46326	9.44647	9.33003	9.39315	9.42738	8.55146	7.97071	6.6757	6.37573	6.72782	3.72933	6.92526	6.37832	7.4533	6.00937	5.64332	6.34201	6.04304		1.69506	2.77313	3.2195	2.8608	6.1068	2.35147	3.08494	1.99317	3.32067	3.74983	3.08536	2.50842		2.63712	3.27508	0.637961	0.279944
TAATCATGCCAATATCGTAAA	TRCN0000353179	Ick	10.1134	9.94681	9.97745	9.99254	10.1147	9.84273	10.1343	10.0088	9.6949	9.84747	9.55906	8.62988	8.56717	9.39073	8.53547	8.13472	8.07848	6.31593	7.21274	7.71926	6.13534	6.35306	6.85934	7.67474		1.54628	0.556083	1.44198	1.85783	2.03619	3.52679	2.92161	2.28954	3.55956	3.49441	2.69973	0.955141		1.35054	2.68537	1.33483	0.0115467
CCCTTTGCTGTGACCTATTAA	TRCN0000360327	Atm	10.2652	10.0857	10.1427	10.1368	10.3585	9.86264	10.1241	10.0108	9.88083	9.97904	9.86053	9.10251	7.85543	6.92911	8.44525	7.12981	4.41027	5.24027	5.52056	5.32237	5.25118	7.0182	6.4735	7.43451		2.40978	3.15655	1.69749	3.00696	5.94827	4.62237	4.60352	4.68845	4.62964	2.96085	3.38704	1.668		2.5677	4.06352	1.49582	0.026326
CGCTTAGCTGGAGGCTTAAAT	TRCN0000360328	Atm	10.1649	9.85033	10.0536	10.0656	10.2935	9.53481	9.8517	9.83099	9.71973	9.77725	9.90632	9.20172	8.20852	7.72173	7.13588	7.04889	8.70115	8.53983	9.11285	6.05355	7.23101	6.8473	6.87844	7.03411		1.95635	2.1286	2.91772	3.01668	1.59231	0.994978	0.738845	3.77744	2.48872	2.92996	3.02788	2.16761		2.50484	2.21472	-0.29012	0.54216
AGACACTACTGGGAGGTAACA	TRCN0000367021	Spryd4	8.82728	8.61195	8.6453	8.65719	8.89821	8.33327	8.54477	8.55922	8.44713	8.45801	8.53801	7.646	5.04932	5.74934	5.5182	6.92209	3.68279	4.89033	7.34313	4.36034	5.44272	5.06172	6.81241	4.62205		3.77796	2.86262	3.1271	1.7351	5.21542	3.44294	1.20164	4.19888	3.00442	3.39628	1.7256	3.02394		2.87569	3.15114	0.275447	0.667716
GTGTATTTGAAGTCTCGAATA	TRCN0000374164	Tead1	10.1393	9.92271	9.99801	9.97588	10.2562	9.74707	10.0258	9.96488	9.80729	9.84849	9.67435	8.86265	7.24905	7.62443	6.35365	6.44648	2.88134	4.7257	5.26632	3.48587	5.87712	4.70921	3.76802	5.22675		2.8902	2.29828	3.64436	3.52941	7.37486	5.02137	4.75948	6.47901	3.93017	5.13929	5.90633	3.6359		3.09056	5.2808	2.19024	0.00242236
ACCACGATGCCTCAACCTTTA	TRCN0000374481	Plod2	8.46783	8.22752	8.34473	8.30503	8.56979	8.00419	8.2914	8.12029	8.08009	8.1681	8.1187	7.29369	5.61374	5.65029	5.25781	4.75784	0	2.30537	2.20492	3.87491	1.08126	7.62807	2.55652	2.98859		2.85409	2.57723	3.08691	3.54719	8.56979	5.69882	6.08649	4.24538	6.99883	0.540033	5.56218	4.3051		3.01636	5.25083	2.23447	0.0325372
GCTGAAGACCTACCCTTTAAA	TRCN0000376981	Crkl	8.98858	8.67659	8.85153	8.89322	9.03178	8.43909	8.73953	8.62595	8.61672	8.66022	8.65448	7.90122	7.89001	8.11172	6.93737	7.26731	7.07173	4.84726	3.87118	4.26348	1.81822	5.25058	5.69229	5.52974		1.09857	0.564871	1.91416	1.62591	1.96006	3.59183	4.86835	4.36248	6.79849	3.40964	2.96218	2.37148		1.30088	3.79056	2.48969	0.00265913
CCAAAGCGATGATTCGAATTT	TRCN0000380301	Arl4c	13.6207	13.4031	13.4586	13.5624	13.758	13.2797	13.4613	13.4126	13.2343	13.3477	13.1106	12.1578	10.8737	11.2064	10.4472	10.7781	8.65066	9.98111	11.6454	10.8896	12.2368	14.3961	10.8344	10.391		2.74691	2.19663	3.01138	2.78429	5.1073	3.29857	1.81583	2.52305	0.997495	-1.0484	2.27628	1.76677		2.6848	2.09211	-0.592687	0.388746

## Sheet: Table S8
Table S8: Secondry in vivo Screen analysis.This table shows the change in shRNA abundance upon in vivo proliferation of candidate genes screened in this study. Each value represents the reads for that shRNA/total reads from that samples per million (log2).
			238N1 metastasis		482N1 metastasis			238N1 metastasis			482N1 metastasis				238N1 metastasis	482N1 metastasis	238N1 metastasis	482N1 metastasis	238N1 metastasis	482N1 metastasis
Hairpin Sequence	Hairpin IDs	Corresponding Gene	Early Time point, Replicate1	Early Time point, Replicate2	Early Time point, Replicate1	Early Time point, Replicate2		Late Time point, Replicate 1	Late Time point, Replicate 2	Late Time point, Replicate 3	Late Time point, Replicate 1	Late Time point, Replicate 2	Late Time point, Replicate 3		Avg of Early Time point	Avg of Early Time point	Avg of Late Time point	Avg of LAte Time point	Early-Late	Early-Late
GCAGGTATTTGACATACTAAA	TRCN0000009511	Nfkb1	10.2071	10.2621	10.3051	10.266	#NUM!	8.26617	9.17056	8.89484	9.07247	9.38121	9.2633		10.2346	10.2855	8.77719	9.23899	1.45739	1.04654
GCACCATAAACACCAAATTTA	TRCN0000009513	Nfkb1	9.6048	9.63396	9.61278	9.57437	#NUM!	8.93565	8.13352	8.90366	8.56218	8.36248	8.16761		9.61938	9.59357	8.65761	8.36409	0.961768	1.22948
CCGGAGTCAGTATCCAGAAAT	TRCN0000012009	Ndufaf4	10.6239	10.5214	10.4943	10.5152	#NUM!	9.83027	9.86394	9.6573	9.85881	10.0925	9.87227		10.5726	10.5047	9.78383	9.94118	0.788808	0.563542
GCTCAAGAGTACTATTTAGAA	TRCN0000012011	Ndufaf4	10.7231	10.7997	10.7449	10.7053	#NUM!	9.33332	8.99035	9.35113	9.96832	9.91705	10.0056		10.7614	10.7251	9.22493	9.96365	1.53648	0.761429
GCTGAAGGTCAAGTGTCTGAA	TRCN0000012379	Fkbp8	9.57664	9.44214	9.39106	9.42789	#NUM!	10.3701	10.242	10.2802	10.0095	9.88827	9.97301		9.50939	9.40947	10.2974	9.95694	-0.788016	-0.547468
GATGGTGAAGAGCAGAATAAA	TRCN0000012386	Ywhae	9.68744	9.68605	9.69412	9.67363	#NUM!	8.8948	8.76052	8.79761	8.66328	8.71047	8.61396		9.68674	9.68388	8.81764	8.66257	0.8691	1.0213
GCTGAGTGAAGAAAGCTATAA	TRCN0000012387	Ywhae	10.0276	10.0879	10.0496	9.99794	#NUM!	7.81251	7.44383	8.92993	6.64389	6.91067	6.98721		10.0577	10.0238	8.06209	6.84726	1.99566	3.1765
GCTTTGGTACTACAGAACTTT	TRCN0000012628	Raf1	10.3372	10.3551	10.3265	10.3225	#NUM!	8.12007	8.56301	8.30251	8.69067	8.88011	9.03427		10.3462	10.3245	8.32853	8.86835	2.01762	1.45617
CGGAATGGAATGAGCTTACAT	TRCN0000012631	Raf1	9.66798	9.62008	9.58574	9.68509	#NUM!	9.64847	10.0491	9.2833	10.3323	10.804	10.2117		9.64403	9.63542	9.66028	10.4493	-0.0162536	-0.813917
CCAACAAGAAGACCTCTTGAA	TRCN0000012713	Pkn2	0	0	0	0	#NUM!	0	0	0	0	0	0		0	0	0	0	0	0
GCTACAGGATAGCAAGACAAA	TRCN0000012717	Pkn2	9.77629	9.80483	9.79234	9.78438	#NUM!	8.79129	8.93596	9.26046	8.89295	9.1641	9.05931		9.79056	9.78836	8.99591	9.03879	0.794653	0.74957
GCCGACTATATGGACTGCTTA	TRCN0000012774	Cul2	10.6477	10.4959	10.4631	10.4936	#NUM!	11.1344	11.1096	10.9903	11.0712	11.6494	11.4269		10.5718	10.4783	11.0781	11.3825	-0.506308	-0.904162
GCGACGTTCTTCAGACATCAT	TRCN0000012799	Anapc2	10.9595	10.5706	10.4803	10.6244	#NUM!	9.89713	9.90991	9.79884	10.6668	10.8906	10.8961		10.7651	10.5523	9.86863	10.8178	0.896455	-0.265491
CCACGTACAGAGATTCTTCTA	TRCN0000012802	Anapc2	10.6819	10.8243	10.8285	10.7952	#NUM!	10.5923	10.4638	10.4928	10.6171	10.7255	10.5388		10.7531	10.8118	10.5163	10.6271	0.236824	0.184722
GCCATCAAGGTGACTCACAAA	TRCN0000022470	Limk2	10.1622	10.1494	10.0493	10.0915	#NUM!	10.3465	10.2653	10.4128	10.284	10.2808	10.5214		10.1558	10.0704	10.3416	10.3621	-0.185757	-0.291668
GTGAGATCATTGGGCAGGTAT	TRCN0000022471	Limk2	7.226	7.00969	6.88155	7.06286	#NUM!	8.02574	7.8977	7.62935	8.42288	8.40229	8.77155		7.11785	6.97221	7.85093	8.53224	-0.733084	-1.56003
GCCAGTGTGAAGCATGATATA	TRCN0000022485	Ripk2	9.83884	9.89833	9.78258	9.80593	#NUM!	7.20751	7.92024	7.56821	8.74369	9.47011	9.23348		9.86859	9.79426	7.56532	9.14909	2.30327	0.645163
GCATGATGTCACTCTCTCAAT	TRCN0000022487	Ripk2	10.3945	10.4563	10.3595	10.4452	#NUM!	9.66223	9.94517	10.0802	10.3709	10.117	9.84411		10.4254	10.4023	9.89587	10.1107	0.529547	0.291677
GTGACCATTGAGGGAATGATT	TRCN0000022576	Acvr1b	9.60339	9.35614	9.30373	9.32849	#NUM!	7.62839	6.79527	7.39585	6.85962	7.17817	7.52727		9.47976	9.31611	7.27317	7.18835	2.20659	2.12776
GCAGGAAGATGTGAAGATTTA	TRCN0000022578	Acvr1b	10.4008	10.4666	10.4465	10.4162	#NUM!	9.52776	9.55214	9.62829	11.1987	10.7727	10.6468		10.4337	10.4313	9.5694	10.8727	0.864323	-0.441384
CGTCTTCACGAGGGATGATTT	TRCN0000022648	Ankk1	11.4181	11.213	11.2204	11.2475	#NUM!	11.3629	12.4512	11.9067	11.2114	11.3984	11.137		11.3155	11.234	11.9069	11.2489	-0.591366	-0.0149813
GCTGAGATTGTGTCTGCTTTA	TRCN0000022736	Pdpk1	10.1639	10.0899	10.0294	10.0625	#NUM!	7.56324	7.8083	7.90298	7.70513	8.20853	7.35809		10.1269	10.046	7.75817	7.75725	2.3687	2.2887
CGACAGTTATTACTCACAGAA	TRCN0000022738	Pdpk1	10.9588	10.9551	10.9285	10.9435	#NUM!	7.67579	8.18004	8.06219	8.26298	8.96739	8.96778		10.957	10.936	7.97267	8.73272	2.98429	2.20325
GATCAGCAAGACTGTGGAATA	TRCN0000022825	Rps6ka1	9.50848	9.4533	9.49387	9.53642	#NUM!	7.15852	7.6207	7.66362	8.27045	8.598	8.45973		9.48089	9.51515	7.48095	8.44273	1.99995	1.07242
CTACATACTCTGCTCTCAATA	TRCN0000022827	Rps6ka1	11.5946	11.7174	11.6952	11.693	#NUM!	10.3597	10.4236	10.5229	10.139	10.0996	9.89526		11.656	11.6941	10.4354	10.0446	1.22061	1.64948
GCAGAGTAGAAGAGATGATTT	TRCN0000023765	Csnk1g3	10.4716	10.5972	10.5494	10.5411	#NUM!	7.84355	8.31516	8.17182	8.05762	8.21216	8.21735		10.5344	10.5452	8.11018	8.16238	2.42421	2.38287
CCAGCAAGTCATTCATATCAT	TRCN0000023767	Csnk1g3	7.79373	7.93642	7.96557	7.9004	#NUM!	7.15165	6.15454	7.20051	6.18877	6.16393	5.48978		7.86507	7.93299	6.83557	5.94749	1.02951	1.98549
GCTCTGGAGTATCTCCATGAA	TRCN0000023786	Vrk3	9.95441	9.91787	9.9286	9.95579	#NUM!	9.7048	8.96414	9.19356	10.7282	10.4374	10.3974		9.93614	9.9422	9.2875	10.521	0.648637	-0.578795
CAAGTACAGGTTCCTAGTATT	TRCN0000023788	Vrk3	10.2313	10.3374	10.3695	10.3331	#NUM!	9.47303	9.26451	9.58036	10.3219	10.3329	10.1002		10.2843	10.3513	9.4393	10.2517	0.845026	0.0996364
GCCATTAAACTGGAACCAATA	TRCN0000023799	Csnk1g1	10.3236	10.3445	10.3216	10.3298	#NUM!	9.83134	9.56537	9.56838	10.0043	9.97002	9.87168		10.334	10.3257	9.65503	9.94866	0.679	0.377052
CCAATGAATATGTAGCCATTA	TRCN0000023801	Csnk1g1	10.7736	10.9244	10.9508	10.936	#NUM!	9.58398	9.55329	8.92767	9.11938	9.2039	8.92515		10.849	10.9434	9.35498	9.08281	1.49405	1.86062
GCCTTAAACAAGAAAGCTATT	TRCN0000023939	Mtor	10.2996	10.3203	10.3207	10.2688	#NUM!	8.13502	7.89992	7.91162	7.23634	7.50776	7.27147		10.3099	10.2947	7.98218	7.33852	2.32776	2.95621
CCCAATATTTCGGGATTTCTT	TRCN0000025210	Pak2	12.1505	12.2352	12.234	12.2384	#NUM!	12.5783	12.65	12.2085	12.4996	12.6174	12.4805		12.1928	12.2362	12.4789	12.5325	-0.286118	-0.29626
CCAGATGTACTGCTTAGTAAA	TRCN0000025616	Pik3ca	10.7048	10.8525	10.8406	10.8147	#NUM!	8.41996	8.53319	8.64222	9.60773	9.34847	9.33639		10.7787	10.8276	8.53179	9.43086	2.24689	1.39678
GCCTTTCAATCTGCTCTGTTA	TRCN0000025618	Pik3ca	9.91539	9.7913	9.71684	9.72719	#NUM!	9.48966	9.16838	9.20359	8.8354	9.62732	9.09051		9.85335	9.72201	9.28721	9.18441	0.566137	0.537605
GTGAAGTATTTGAGGCCATTA	TRCN0000025664	Csnk2a2	9.75959	9.57854	9.57297	9.65604	#NUM!	9.24814	9.27126	8.89075	9.57772	9.40489	9.64117		9.66906	9.61451	9.13672	9.54126	0.532345	0.0732477
GTATGATTATAGCTTGGACAT	TRCN0000025666	Csnk2a2	10.2251	10.2194	10.1876	10.254	#NUM!	8.49102	9.025	8.71847	9.16377	9.18439	8.80432		10.2222	10.2208	8.74483	9.05083	1.4774	1.16997
GCAGAGCAGTTACGAATAGAA	TRCN0000025669	Wee1	11.0885	11.046	10.9732	11.0164	#NUM!	10.2591	10.4638	10.61	9.79715	9.93253	9.93688		11.0673	10.9948	10.4443	9.88885	0.62296	1.10592
GCAACATGAAGTCACGGTATA	TRCN0000025672	Wee1	9.96269	9.88865	9.84046	9.85863	#NUM!	8.46944	7.82325	8.97838	8.26216	7.37695	7.59803		9.92567	9.84955	8.42369	7.74572	1.50199	2.10383
CCCATTTGGTTCCAAGCAGAA	TRCN0000025884	Smad1	0	0	0	0	#NUM!	0	0	0	0	0	0		0	0	0	0	0	0
TCCTATTTCATCCGTGTCTTA	TRCN0000025933	Smad1	0	0	0	0	#NUM!	0	0	0	0	0	0		0	0	0	0	0	0
GCAGCCAAATTAGCTGTTGAT	TRCN0000027026	Eif2ak2	10.0415	9.82214	9.7642	9.84847	#NUM!	9.69325	9.5052	9.14953	9.97107	9.77511	9.79542		9.9318	9.80633	9.44933	9.8472	0.482478	-0.0408631
CGCCAGGTTTAACAGCGATTT	TRCN0000027041	Eif2ak2	9.48413	9.10409	9.03678	9.13213	#NUM!	9.83535	10.1935	9.75843	9.04989	9.697	10.2575		9.29411	9.08446	9.92908	9.66812	-0.634972	-0.583659
CCTTTGTAATAGGAACAACAT	TRCN0000027687	Plcl1	4.51451	3.97352	4.50499	4.5037	#NUM!	1.1785	0.943228	1.93218	2.58517	3.17073	3.39462		4.24401	4.50435	1.3513	3.05017	2.89271	1.45418
CCTTACGAGAAGCCATAGATA	TRCN0000027719	Plcl1	9.81341	10.0653	9.90452	9.86313	#NUM!	8.5884	9.30455	8.92487	8.90375	8.64731	8.84298		9.93935	9.88382	8.93927	8.79802	1.00008	1.08581
GCTGCTTCTAAGAAACTTTAT	TRCN0000028221	Mctp1	7.84124	7.81587	7.8961	7.77725	#NUM!	5.66778	6.15732	6.181	7.22902	7.42378	6.87241		7.82855	7.83668	6.00203	7.17507	1.82652	0.661604
CCACTGAGATACATTGTTCTT	TRCN0000028249	Mctp1	10.5878	10.7309	10.717	10.6971	#NUM!	10.562	10.2714	10.4548	10.3982	10.0942	10.2036		10.6593	10.7071	10.4294	10.232	0.229957	0.475074
CCAATGTGGATTACTTGCTTT	TRCN0000028758	Stk31	12.3853	12.475	12.5046	12.4795	#NUM!	13.2413	13.1469	13.2359	12.9397	12.6825	12.6572		12.4302	12.4921	13.208	12.7598	-0.77784	-0.267735
GCATCCCAACATTGTGCATAT	TRCN0000028805	Stk36	8.83403	8.82527	8.83889	8.8071	#NUM!	8.29702	7.99489	8.35251	8.82528	9.18237	8.82226		8.82965	8.82299	8.21481	8.9433	0.61484	-0.12031
GCCGTATAGTTGTGGCTTCTA	TRCN0000028810	Stk36	6.98916	6.70823	6.86192	6.72061	#NUM!	6.35083	6.72958	5.67127	7.40172	7.72831	7.96834		6.8487	6.79126	6.25056	7.69946	0.598139	-0.908193
CCAGGAGTACATCAACCTCTT	TRCN0000030529	H13	10.4849	10.5095	10.5679	10.5437	#NUM!	9.89871	9.41345	9.96936	10.1485	10.4542	10.1333		10.4972	10.5558	9.76051	10.2453	0.736708	0.31045
CTATGACATCTTCTGGGTATT	TRCN0000030533	H13	10.4138	10.4981	10.4744	10.47	#NUM!	9.06724	8.89312	9.26794	9.87526	9.64097	9.51573		10.4559	10.4722	9.0761	9.67732	1.37981	0.794878
GCACGATTTAGTGGAACAAAT	TRCN0000031156	Nln	10.419	10.4444	10.3656	10.4216	#NUM!	7.67291	7.73579	7.25199	8.92027	8.99292	9.08849		10.4317	10.3936	7.55356	9.00056	2.87815	1.39301
GCGAACTTACTTCCATGAGTT	TRCN0000031158	Nln	10.1245	9.99068	9.84015	9.98495	#NUM!	10.0051	9.64202	10.1655	10.2314	10.252	10.4369		10.0576	9.91255	9.93755	10.3068	0.120064	-0.394226
GCAGTCTACCTCTGAAAGATT	TRCN0000031201	Yme1l1	10.2417	10.2824	10.1836	10.2197	#NUM!	10.503	10.5557	10.596	9.59852	9.4819	9.42463		10.2621	10.2017	10.5516	9.50169	-0.289468	0.699967
CCTGAGAATGACAGATGGAAT	TRCN0000031202	Yme1l1	10.9025	11.003	11.0215	10.9755	#NUM!	10.7408	10.4651	10.6601	9.91406	10.0084	10.0243		10.9528	10.9985	10.622	9.98224	0.330772	1.01625
GCTTGGGTAATAGCAGCCATT	TRCN0000039399	Hdac1	8.88723	8.7557	8.79945	8.80165	#NUM!	9.60157	9.40986	9.64279	9.51823	9.55618	9.51205		8.82146	8.80055	9.55141	9.52882	-0.729943	-0.728272
CCTTGCAGTCTCTCTGAAGTA	TRCN0000041513	Hadh	10.1109	10.1118	10.1425	10.0982	#NUM!	9.96025	9.94591	10.0767	9.1219	9.44187	9.25959		10.1114	10.1204	9.99427	9.27446	0.117096	0.84591
CGTCTTCTTTGCAGATCACAA	TRCN0000041516	Hadh	7.72266	7.55095	7.51602	7.49794	#NUM!	4.44453	5.57882	5.58619	5.23667	5.72647	4.75281		7.63681	7.50698	5.20318	5.23865	2.43363	2.26833
GCCATTAGAAACGGTGCAGAA	TRCN0000041618	Ndufb3	10.0932	10.0706	10.0217	10.0867	#NUM!	9.82811	9.85633	10.1511	9.85827	9.63053	10.0359		10.0819	10.0542	9.94517	9.84157	0.13671	0.21263
CATCACCTTCCCGAGTGTAAT	TRCN0000041621	Ndufb3	9.81097	9.87966	9.86716	9.90513	#NUM!	8.85304	8.71692	8.72675	9.2173	8.95878	9.3014		9.84531	9.88615	8.76557	9.15916	1.07974	0.726988
GAACTTCTTCAGGCAGATAAA	TRCN0000041840	Ndufa8	10.2676	10.085	10.0545	10.081	#NUM!	8.20353	8.51073	8.51909	9.0514	9.15608	9.29987		10.1763	10.0677	8.41112	9.16912	1.76518	0.898596
CCGTTATCATGGACACAGTAT	TRCN0000041923	Pdha2	9.82163	9.94829	9.92003	10.0293	#NUM!	9.33352	9.45093	9.73209	9.894	9.90325	9.98272		9.88496	9.97465	9.50551	9.92666	0.37945	0.0479905
CAGATCCACATCATAGACTTT	TRCN0000042491	Tssc1	12.1603	12.1565	12.1443	12.1294	#NUM!	13.6875	13.9839	13.8691	13.5992	13.3956	13.4753		12.1584	12.1369	13.8468	13.49	-1.68847	-1.35315
GCAGCAAGCATAATACCATTA	TRCN0000042519	Nf2	10.1035	10.2333	10.1506	10.2194	#NUM!	12.9236	13.181	12.9992	12.5842	12.3449	12.5827		10.1684	10.185	13.0346	12.5039	-2.86623	-2.31894
CGCTATGAAGAAGTTTATCTT	TRCN0000042546	Rb1	10.9195	11.0525	10.9851	11.0197	#NUM!	15.0682	15.0446	15.1255	14.2149	14.0597	14.1561		10.986	11.0024	15.0794	14.1435	-4.09342	-3.14111
CGACAAGGAAATAGTGAAATT	TRCN0000042598	Cdkn2b	10.7489	10.9009	10.9006	10.8953	#NUM!	15.1838	14.6781	15.0347	15.61	15.5644	15.5804		10.8249	10.898	14.9655	15.5849	-4.14061	-4.68697
CGAATAGGAGATCAAGAATTT	TRCN0000042603	Crk	10.8598	11.0066	10.9479	10.9875	#NUM!	8.80216	8.75533	8.91444	8.53195	8.0963	8.4097		10.9332	10.9677	8.82398	8.34598	2.10924	2.62174
GCTGGTAAAGGTTACGAAGAT	TRCN0000042604	Crk	10.1732	10.2095	10.188	10.1512	#NUM!	9.05575	8.88183	9.12468	8.83922	8.81219	9.04293		10.1914	10.1696	9.02075	8.89812	1.17061	1.27153
GCTTAAGCAGAAAGTCATGAA	TRCN0000042695	Jun	10.1336	10.2032	10.1597	10.1546	#NUM!	9.7971	9.98326	10.1173	10.5109	10.563	10.5428		10.1684	10.1571	9.96588	10.5389	0.20255	-0.381757
CCTCTCTCTTAAACTTGATAT	TRCN0000042724	Tsc2	10.6092	10.7543	10.7352	10.7286	#NUM!	13.2173	12.9479	13.1413	14.493	14.5231	14.2817		10.6817	10.7319	13.1022	14.4326	-2.42044	-3.70068
GCCATTGACGTAGATTCATTA	TRCN0000054411	Mtif2	9.96792	10.0261	9.94677	9.95088	#NUM!	10.5778	10.4583	10.3964	9.43116	9.14283	9.17012		9.997	9.94882	10.4775	9.24804	-0.480498	0.700782
ACAAACACGTTTCTCCAAGAA	TRCN0000054496	Dap	10.4079	10.4924	10.4434	10.4455	#NUM!	10.4365	9.36679	9.63539	9.60181	9.86028	9.83091		10.4502	10.4444	9.81288	9.76434	0.637285	0.680091
GTGTTCATCTCTGGCGTTATT	TRCN0000054497	Dap	9.93685	9.76468	9.70552	9.77009	#NUM!	9.14347	8.90254	9.03516	9.96136	9.8772	9.81515		9.85077	9.73781	9.02706	9.88457	0.82371	-0.146765
GATGGAGTTCATCGACAACAA	TRCN0000054593	Srf	10.0932	10.0278	9.96241	10.0249	#NUM!	8.79996	9.3258	8.83709	8.99308	9.12562	8.70205		10.0605	9.99367	8.98762	8.94025	1.07287	1.05342
GCCATGTGTATACCTTTGCCA	TRCN0000054597	Srf	9.9031	9.85042	9.77342	9.85036	#NUM!	9.30272	9.38499	9.1636	9.0947	9.24521	8.9014		9.87676	9.81189	9.28377	9.08044	0.59299	0.731451
GCCAGAATCCATCCATTCATT	TRCN0000054979	Mtor	9.79652	9.81979	9.78193	9.82141	#NUM!	6.01946	6.13493	6.01665	5.36607	5.6113	5.43981		9.80816	9.80167	6.05702	5.47239	3.75114	4.32928
GCTTGATCTTAGGGATGATAA	TRCN0000055188	Rac1	10.0932	10.1627	10.1046	10.0861	#NUM!	8.31989	7.99308	8.05709	7.96652	8.51766	8.19822		10.128	10.0954	8.12335	8.22747	2.00461	1.86791
CTCATCAGTTACACGACCAAT	TRCN0000055190	Rac1	10.6651	10.7785	10.7122	10.7036	#NUM!	9.66272	9.43632	9.52394	9.77972	9.81751	9.86437		10.7218	10.7079	9.54099	9.82053	1.18079	0.887367
CTACGCCAACCTCAGCAACTT	TRCN0000055205	Jun	10.0806	9.8935	9.88794	9.94947	#NUM!	9.89467	10.1958	9.5081	10.054	9.85512	10.0976		9.98703	9.9187	9.8662	10.0023	0.120831	-0.0835504
GCTAGTGATTGATCCAGACAA	TRCN0000055276	Mapk9	9.30328	9.34257	9.29735	9.33282	#NUM!	8.59753	8.92717	8.08432	8.61317	8.61479	9.10261		9.32293	9.31509	8.53634	8.77686	0.786586	0.538231
CAGACCAAAGTACCCTGGAAT	TRCN0000055277	Mapk9	9.94608	9.82683	9.86686	9.88612	#NUM!	8.67243	8.77084	8.78841	9.4531	9.37445	9.4725		9.88645	9.87649	8.74389	9.43335	1.14256	0.443136
GCGATTCACAACCCAAATTTA	TRCN0000055286	Klf5	9.8747	9.7359	9.61864	9.67661	#NUM!	6.43324	7.34004	6.43493	7.70824	7.83141	7.64462		9.8053	9.64763	6.73607	7.72809	3.06923	1.91954
GCAGTAATGGACACCCTTAAT	TRCN0000055287	Klf5	10.0268	10.0944	10.1614	10.1099	#NUM!	8.55978	8.8601	9.05807	10.5715	10.6423	10.3147		10.0606	10.1357	8.82598	10.5095	1.23461	-0.373819
CCCGAAGTCTACTCCATCATT	TRCN0000066104	Tnfrsf1a	10.3298	10.4193	10.3227	10.3593	#NUM!	9.82668	10.1459	9.74687	10.3033	10.3227	10.0872		10.3745	10.341	9.90647	10.2377	0.468074	0.103255
CCTCGTGCTTTCCAAGATGAA	TRCN0000066106	Tnfrsf1a	9.64516	9.61647	9.66999	9.588	#NUM!	6.27189	7.02968	6.10775	7.5399	7.43059	7.8221		9.63082	9.62899	6.46977	7.59753	3.16105	2.03146
CGAGAAATGTAACACGGTCAA	TRCN0000066558	Psme3	9.63276	9.47037	9.49068	9.53079	#NUM!	7.91022	7.59769	7.7365	8.36212	8.58432	8.4501		9.55157	9.51073	7.74814	8.46551	1.80343	1.04522
CGCACTGTCACAGAGATTGAT	TRCN0000066560	Psme3	7.15451	6.97914	6.93419	7.03658	#NUM!	5.16035	5.45027	6.12642	5.3292	5.2473	6.21224		7.06683	6.98539	5.57901	5.59625	1.48782	1.38914
CTTCTCCGTTCCAAGATCCTT	TRCN0000067120	Il23a	10.1942	10.1811	10.2066	10.1779	#NUM!	9.20286	9.17502	9.54438	9.05621	9.31956	9.33671		10.1877	10.1923	9.30742	9.23749	0.880263	0.9548
GCCCTTAGTGCCAACAGCTTA	TRCN0000067122	Il23a	3.4656	3.39979	3.6721	3.40855	#NUM!	1.70457	1.3838	3.01464	1.85098	2.50776	2.84208		3.43269	3.54032	2.03434	2.40027	1.39835	1.14005
CCCACATCACTGGCAAACATT	TRCN0000067229	Ghr	10.361	10.4793	10.4249	10.4162	#NUM!	9.68224	10.077	9.60577	9.83452	9.70052	9.69882		10.4202	10.4206	9.78833	9.74462	0.631855	0.675936
GCTTTAACCAAGAGGACATTT	TRCN0000067232	Ghr	10.2239	10.2793	10.2233	10.3358	#NUM!	8.4711	8.3909	8.824	9.17965	9.33204	9.02265		10.2516	10.2796	8.562	9.17811	1.68962	1.10144
GTCATCCAATAAGAACATCTA	TRCN0000067575	Cd55	10.3026	10.4055	10.3702	10.3884	#NUM!	9.74432	9.12195	9.72988	10.5566	10.232	10.4308		10.3541	10.3793	9.53205	10.4065	0.822032	-0.027188
GTCACAGGAAATACTGTTGAT	TRCN0000067577	Cd55	9.75641	9.82761	9.82755	9.82218	#NUM!	10.0582	9.6294	9.78899	10.3058	10.0959	9.9068		9.79201	9.82486	9.82553	10.1028	-0.0335196	-0.277969
GTAGACAGTTTCCACTTCCTT	TRCN0000067693	Inha	11.2837	11.2946	11.3318	11.3312	#NUM!	12.4319	12.3765	12.549	12.3557	12.3916	12.3877		11.2891	11.3315	12.4525	12.3783	-1.16332	-1.04685
GCCCTGCTCTTCTCCACGCTA	TRCN0000067794	Csf2ra	9.03912	8.74088	8.77211	8.80632	#NUM!	8.72138	9.1073	9.19079	9.19074	9.54	9.32944		8.89	8.78921	9.00649	9.35339	-0.116491	-0.564182
GCGCTCCTGTATGCAGTGACA	TRCN0000067797	Csf2ra	8.87674	8.37653	8.21223	8.41672	#NUM!	9.33595	9.53604	9.51165	8.92841	9.13504	9.29395		8.62664	8.31447	9.46121	9.11913	-0.834575	-0.804656
GCCACTTCTGAGCATGAACTA	TRCN0000068000	Cd274	9.73593	9.68131	9.5958	9.60956	#NUM!	7.20308	7.59223	7.73011	8.54192	8.73818	8.2848		9.70862	9.60268	7.50847	8.52163	2.20015	1.08105
GTTTACTATCACGGCTCCAAA	TRCN0000068002	Cd274	10.2397	10.2546	10.2355	10.2156	#NUM!	10.8967	10.9583	11.0301	10.9678	10.8694	10.7978		10.2471	10.2256	10.9617	10.8784	-0.714564	-0.652783
GCCACTTCTTTCTGGCTTCAT	TRCN0000068439	Slc20a2	8.93965	8.87212	8.82438	8.83634	#NUM!	8.87644	9.08898	9.10069	9.07683	9.10306	9.18868		8.90589	8.83036	9.02204	9.12286	-0.116148	-0.292499
GAGTTACACAAGAAGCTGCTA	TRCN0000068442	Slc20a2	9.81829	9.65651	9.57937	9.67107	#NUM!	8.07137	8.98371	8.68314	8.59218	8.8085	8.50713		9.7374	9.62522	8.57941	8.63594	1.15799	0.989281
CCTTTGGCTACCTACAGACAA	TRCN0000070130	Slc22a18	8.0578	7.96078	7.97474	7.98116	#NUM!	7.38326	7.54101	7.56582	9.41769	9.31925	8.69191		8.00929	7.97795	7.4967	9.14295	0.512592	-1.165
GCAGTTCTCCATCCTACCATA	TRCN0000070131	Slc22a18	-1.39238	-0.441517	-2.3279	-2.05088	#NUM!	0	0	0	0	0	0		-0.91695	-2.18939	0	0	-0.91695	-2.18939
GCTATGCCAATACTGGTTATA	TRCN0000070228	Bet1	6.79991	6.94219	7.11089	6.9378	#NUM!	5.89987	4.5022	5.2336	5.4394	6.39853	5.5934		6.87105	7.02435	5.21189	5.81045	1.65916	1.2139
GCTGAAATGGATTCACAATTT	TRCN0000070230	Bet1	10.7314	10.8284	10.7826	10.7891	#NUM!	8.87727	8.92092	8.96975	9.50286	8.68174	9.06782		10.7799	10.7858	8.92264	9.08414	1.85726	1.70171
GCAGTCAGCATGTAAGCAGAA	TRCN0000070998	Top3a	10.4152	10.3445	10.2625	10.3152	#NUM!	8.28869	8.8441	8.67951	9.58438	9.97566	9.64039		10.3798	10.2888	8.6041	9.73348	1.77573	0.555332
GCCAGAATGTTACTATGATAA	TRCN0000070999	Top3a	10.5616	10.7497	10.6761	10.7138	#NUM!	8.82854	8.8863	8.5436	9.55282	9.66931	9.48189		10.6557	10.695	8.75281	9.56801	1.90288	1.12696
GCAGGTACACAGCCTTCTAAA	TRCN0000071415	Acp6	6.91823	6.8894	7.10255	7.10899	#NUM!	4.44753	3.90846	4.52279	5.69163	5.6113	5.50048		6.90382	7.10577	4.29293	5.60114	2.61089	1.50463
CCCAACTTACAGAACCAGCAA	TRCN0000071604	Sp1	6.5734	6.45734	6.45673	6.46087	#NUM!	3.48884	3.3058	3.07738	5.47359	4.77722	6.36564		6.51537	6.4588	3.29067	5.53882	3.2247	0.919983
CCTTCACAACTCAAGCTATTT	TRCN0000071606	Sp1	8.75291	8.7937	8.86686	8.7685	#NUM!	5.77185	6.1055	6.72001	6.67801	5.90986	5.98177		8.77331	8.81768	6.19912	6.18988	2.57419	2.6278
GCTACCTAAGTTCCGCGAGGT	TRCN0000071779	Wnt7b	8.32272	8.07812	8.06763	8.15979	#NUM!	9.54744	9.05697	9.267	9.13121	8.99215	9.47967		8.20042	8.11371	9.29047	9.20101	-1.09005	-1.0873
GCAGCTACGCAGCTACCAGAA	TRCN0000071781	Wnt7b	9.53169	9.42628	9.36733	9.38374	#NUM!	9.01341	8.96454	8.64449	9.21713	9.79723	9.43931		9.47898	9.37554	8.87415	9.48456	0.604837	-0.109022
GCAGATATGTAACTGGTTCAT	TRCN0000075524	Tgif2	10.7017	10.819	10.7434	10.7983	#NUM!	9.63678	9.40344	8.74875	9.70968	9.6078	9.5377		10.7604	10.7709	9.26299	9.61839	1.49736	1.15247
GCTCTCAGAATCCTGGGTATT	TRCN0000075715	Lss	9.07165	9.06165	9.04877	9.0995	#NUM!	7.75351	7.8441	7.97194	8.82605	8.88838	8.71014		9.06665	9.07413	7.85651	8.80819	1.21014	0.265943
GCACTGAAGCATTTCCATGAA	TRCN0000075717	Lss	10.172	10.2421	10.1724	10.1911	#NUM!	9.23671	9.21391	9.36268	10.0608	9.3793	9.66277		10.207	10.1818	9.2711	9.70094	0.935933	0.480829
GCAAGTTTATGTGACCTTAAA	TRCN0000076045	Hmgcs1	7.9114	7.94937	7.94356	7.95474	#NUM!	6.08057	5.63572	6.52771	6.5705	6.36574	6.47745		7.93038	7.94915	6.08134	6.47123	1.84905	1.47792
CCTTCACAAATGACCACAGTT	TRCN0000076047	Hmgcs1	8.02019	8.04632	8.12845	8.0044	#NUM!	7.03896	6.6847	7.17743	7.20887	7.52165	6.98721		8.03326	8.06643	6.96703	7.23924	1.06623	0.827183
CCCTTTGACCAGATGACCATT	TRCN0000076103	Atp5h	8.04433	7.95936	7.93067	7.91634	#NUM!	6.52262	7.10646	6.48785	6.64239	6.6341	6.13093		8.00185	7.9235	6.70564	6.46914	1.2962	1.45436
CCAGATGACCATTGATGACTT	TRCN0000076104	Atp5h	10.2161	10.3741	10.3148	10.3168	#NUM!	9.53385	9.42676	9.31873	8.91717	9.07961	8.78381		10.2951	10.3158	9.42645	8.92686	0.868673	1.38895
CCCACTTCTATGACTTCATAA	TRCN0000076188	Atpaf1	11.1402	11.3001	11.2324	11.1996	#NUM!	9.16491	8.79988	9.02039	9.70573	9.83857	9.64099		11.2202	11.216	8.99506	9.72843	2.22509	1.48757
GCTCCACTTCACTGCACTTAT	TRCN0000076189	Atpaf1	10.5993	10.5711	10.4917	10.5871	#NUM!	9.79078	9.90295	10.1949	10.012	9.90783	10.0094		10.5852	10.5394	9.96287	9.97641	0.62234	0.562978
GCTGAATGAACCACTATCTAA	TRCN0000076391	Ywhah	10.2878	10.2957	10.3184	10.2611	#NUM!	10.499	11.2063	10.2513	8.74393	8.94259	8.41638		10.2917	10.2898	10.6522	8.70097	-0.360441	1.58882
GCCAAACAAGCCTTCGATGAT	TRCN0000076392	Ywhah	10.3156	10.1009	9.97731	10.1178	#NUM!	9.8772	10.0637	9.74249	9.93737	10.1627	10.4352		10.2082	10.0475	9.89447	10.1784	0.313779	-0.130883
GCGGTGATGGAATGAACAGTA	TRCN0000076411	Plod2	9.07471	8.86454	8.83071	8.82333	#NUM!	7.82495	7.676	7.92634	9.21948	9.63533	9.41598		8.96963	8.82702	7.8091	9.4236	1.16053	-0.596577
GCCCATAATTGATGCCTGCAA	TRCN0000076569	Aox1	9.76654	9.56504	9.46936	9.59747	#NUM!	9.81135	10.0836	9.47162	10.0791	10.2269	10.2566		9.66579	9.53341	9.78887	10.1875	-0.123072	-0.654121
GCTGTTTGGATCAAGAAATAA	TRCN0000076572	Aox1	10.3715	10.4386	10.3751	10.416	#NUM!	9.102	9.02195	9.06268	8.82627	9.16018	8.66481		10.405	10.3955	9.06221	8.88375	1.3428	1.51179
GCCAGAATACTACTACATTCA	TRCN0000076587	Nox4	10.7631	10.8125	10.8548	10.838	#NUM!	9.04578	8.58106	8.80574	10.5138	10.4471	10.6001		10.7878	10.8464	8.81086	10.5203	1.97694	0.326084
GCTGCCTACATCCATGTAATA	TRCN0000076818	Pld1	6.61605	6.69803	6.64364	6.52654	#NUM!	4.71206	5.37109	6.41077	6.33665	5.22397	4.80555		6.65704	6.58509	5.49798	5.45539	1.15907	1.1297
GCTGTCTTTGTCTACATAGAA	TRCN0000076911	Plcb1	10.2895	10.3966	10.3096	10.2973	#NUM!	9.11431	9.42906	9.27444	10.0691	10.4181	10.2184		10.3431	10.3035	9.2726	10.2352	1.07047	0.0682617
CGCATGATAACTGTGGTGTAT	TRCN0000076912	Plcb1	10.6836	10.6493	10.5906	10.643	#NUM!	11.1577	10.9331	11.0646	11.4145	11.4485	11.3366		10.6664	10.6168	11.0518	11.3999	-0.385385	-0.783066
GCGGTTTCTGAGCATTGATTT	TRCN0000077594	Rasgrf2	7.33213	6.99866	6.93184	6.9378	#NUM!	7.70988	7.86578	7.84387	8.30741	7.83654	8.7568		7.1654	6.93482	7.80651	8.30025	-0.641114	-1.36543
GCCTCCCAGATAATGAATTAT	TRCN0000077597	Rasgrf2	9.65372	9.67786	9.67245	9.69185	#NUM!	9.66215	9.38024	9.37805	9.17533	9.50642	9.36491		9.66579	9.68215	9.47348	9.34889	0.192308	0.333263
CATGGAGGATAGTGAATGATA	TRCN0000077830	Ccnc	10.7957	10.9554	10.973	10.9294	#NUM!	13.3915	13.0808	13.5212	14.0741	13.8987	13.7756		10.8756	10.9512	13.3312	13.9161	-2.45557	-2.96491
GCCATATAGATGTATGTACTA	TRCN0000078858	Fgfrl1	10.5477	10.7512	10.6959	10.7693	#NUM!	10.2465	9.93596	9.90339	9.536	9.40791	9.34733		10.6495	10.7326	10.0286	9.43041	0.62086	1.30216
GCCAGACATCATGTGGATGAA	TRCN0000078861	Fgfrl1	10.4395	10.4872	10.3667	10.3691	#NUM!	10.3711	9.61414	9.94879	10.6836	10.9712	11.0483		10.4634	10.3679	9.97801	10.901	0.485377	-0.533166
CCGCAGATTGAGCCTACAAAT	TRCN0000078873	Tpr	7.42939	7.34856	7.2132	7.37748	#NUM!	6.4852	7.24004	6.53192	7.29041	7.55787	6.45953		7.38898	7.29534	6.75238	7.1026	0.636591	0.192732
GCTGACTAATCTACAGACAAT	TRCN0000078877	Tpr	6.91596	6.91896	6.95287	6.97426	#NUM!	6.45276	6.10837	6.27684	5.61304	5.44636	6.42383		6.91746	6.96356	6.27933	5.82774	0.638135	1.13582
GCCCTTTGGATGATGTGTTAA	TRCN0000079268	Slc12a9	9.92588	9.86454	9.78356	9.82371	#NUM!	8.58891	9.01826	9.01251	9.33037	9.20804	9.46939		9.89521	9.80364	8.87323	9.33593	1.02198	0.467704
CCATCATTGCAGTCGCCTATA	TRCN0000079272	Slc12a9	9.71549	9.75979	9.83701	9.83367	#NUM!	9.40818	9.95838	9.286	9.35641	9.33507	9.19528		9.73764	9.83534	9.55085	9.29559	0.186785	0.539751
CCTCACAATCTCTCCACTCAT	TRCN0000079363	Slc7a1	13.4334	13.5468	13.5169	13.4979	#NUM!	13.8988	14.068	13.8086	13.9398	13.8808	13.775		13.4901	13.5074	13.9251	13.8652	-0.434999	-0.357784
GCTGATAGGTTTCACCATCTA	TRCN0000079367	Slc7a1	10.22	10.2488	10.2248	10.246	#NUM!	8.47404	9.1274	8.32995	8.88831	9.19859	9.3289		10.2344	10.2354	8.64379	9.1386	1.59061	1.0968
CCCTACAGAAATATAGACAAA	TRCN0000079758	Slc35a3	13.7885	13.9624	14.0195	13.9295	#NUM!	14.0408	13.7705	13.8258	13.9215	13.9822	14.0531		13.8755	13.9745	13.879	13.9856	-0.00356358	-0.0111144
GTGGATACACTGCACAAGGTA	TRCN0000080951	Nudt1	6.86265	6.8894	6.93184	6.8409	#NUM!	6.44078	6.72708	6.99954	6.00696	6.361	6.45875		6.87602	6.88637	6.72247	6.27557	0.153556	0.610801
GCCGGATGACAGCTACTGGTT	TRCN0000080952	Nudt1	7.09747	6.66701	6.7328	6.68043	#NUM!	6.77484	6.08521	6.20403	7.9319	7.35862	8.36836		6.88224	6.70662	6.35469	7.88629	0.527543	-1.17968
GCCAGGAATTGGATTCAGTTT	TRCN0000081058	Ppp3ca	10.2727	10.2432	10.2662	10.2357	#NUM!	8.7294	8.92826	9.36268	9.09735	9.52563	9.33051		10.258	10.2509	9.00678	9.31783	1.2512	0.933102
GCTGGAAGAAAGTGTTGCATT	TRCN0000081059	Ppp3ca	8.48567	8.46337	8.44194	8.48633	#NUM!	9.41786	8.66335	8.99891	8.54861	8.52431	8.62501		8.47452	8.46414	9.0267	8.56598	-0.552186	-0.10184
CCAGATCATTTCCATCTACTT	TRCN0000081253	Ppp5c	10.9656	11.1718	11.1545	11.1329	#NUM!	11.418	11.5454	11.361	11.0739	11.1724	11.292		11.0687	11.1437	11.4415	11.1794	-0.372765	-0.035702
AGCTCCTGTATCCAGATCATT	TRCN0000081255	Ppp5c	9.86883	9.58915	9.5673	9.58029	#NUM!	9.79041	10.1376	10.3966	9.93859	9.89383	9.66107		9.72899	9.57379	10.1082	9.83116	-0.379214	-0.257368
ACAAGTTGAAATGCCCTCATT	TRCN0000081885	Zbtb10	4.88374	4.85616	4.72738	4.84393	#NUM!	3.08923	2.93462	2.27768	4.45888	3.97963	5.84927		4.86995	4.78566	2.76718	4.76259	2.10278	0.0230642
GATTTCAAGTATGGGTTGCTA	TRCN0000081886	Zbtb10	10.794	10.8046	10.7899	10.8063	#NUM!	9.84596	10.5803	10.2418	9.99338	10.0576	9.98687		10.7993	10.7981	10.2227	10.0126	0.576654	0.785498
CTTAGCTGTTGGGCTCTGATT	TRCN0000082023	Gpank1	5.62999	5.2864	5.08995	5.45691	#NUM!	4.40192	3.54526	2.62082	2.238	2.26519	3.36815		5.45819	5.27343	3.52267	2.62378	1.93553	2.64965
GCGATATGATCTGTCCCGAAT	TRCN0000082050	Gtf2b	10.3923	10.3044	10.2535	10.2515	#NUM!	10.4305	10.8719	10.4923	10.362	10.3304	10.2556		10.3483	10.2525	10.5982	10.316	-0.249885	-0.0634754
CAGCAATGACAAAGCAACAAA	TRCN0000082051	Gtf2b	10.9851	10.8736	10.8233	10.8786	#NUM!	10.7512	10.6827	10.6533	10.3753	10.355	10.3919		10.9294	10.8509	10.6957	10.374	0.233644	0.476875
CGCAAGTGTATCCAGAAATAT	TRCN0000082219	Phf7	10.6919	10.6813	10.6567	10.7192	#NUM!	8.71377	8.98489	8.69725	8.91748	9.15745	8.98612		10.6866	10.6879	8.79864	9.02035	1.88798	1.66758
AGACAATCTTTGTGTCCATTA	TRCN0000082222	Phf7	10.707	10.6459	10.6746	10.6687	#NUM!	9.86255	9.9433	10.1359	9.88514	9.67983	9.38712		10.6765	10.6716	9.98058	9.6507	0.695879	1.02094
GCAAACCTCATGTACCACCTT	TRCN0000084578	Mxd1	6.77252	6.68433	6.72738	6.71399	#NUM!	7.01392	6.50801	7.74257	6.64939	6.7647	6.82271		6.72843	6.72068	7.08817	6.7456	-0.359739	-0.0249153
CCACCAAATAGACCAGCTTCA	TRCN0000084582	Mxd1	10.4623	10.4986	10.5378	10.5273	#NUM!	11.1783	11.3162	10.9416	11.1733	11.3378	11.3117		10.4804	10.5325	11.1454	11.2743	-0.664973	-0.741719
GCAGTCATAACAGAGCATCTT	TRCN0000084603	Gtf2h3	10.4605	10.4465	10.4643	10.4875	#NUM!	8.9174	9.00611	8.73377	9.20446	9.3252	9.10886		10.4535	10.4759	8.88576	9.21284	1.56774	1.26307
CTACATTCACAGAGTGAACAA	TRCN0000084605	Gtf2h3	11.283	11.3768	11.3773	11.3704	#NUM!	11.9715	11.5505	11.7839	11.2459	11.3726	11.3266		11.3299	11.3738	11.7686	11.315	-0.43872	0.0588034
GCGGTGTAGCAAGTGCAAGAA	TRCN0000084850	Tcea3	6.97394	6.70823	6.60284	6.74353	#NUM!	6.2685	6.94644	6.5242	6.27595	6.70041	6.88938		6.84109	6.67318	6.57972	6.62191	0.261369	0.0512704
GAAGCTGAACAGTTGCCAGAT	TRCN0000084851	Tcea3	6.62999	6.18297	6.08995	6.17312	#NUM!	5.75623	6.38538	6.44909	5.97072	6.21742	6.32062		6.40648	6.13153	6.1969	6.16959	0.20958	-0.0380502
GATCCCATTGGTGAAGTCTTA	TRCN0000085631	Klf6	6.43099	6.2773	6.34453	6.31544	#NUM!	4.97343	5.84553	5.70146	6.47753	6.52165	6.74447		6.35414	6.32998	5.50681	6.58122	0.847336	-0.251236
TGATGAGTTGACCAGACACTT	TRCN0000085632	Klf6	6.7599	6.49316	6.64077	6.53408	#NUM!	6.26001	6.36229	7.20051	7.05743	5.93083	4.84208		6.62653	6.58742	6.6076	5.94344	0.0189281	0.643978
GCTTGGTTGAACTATCCTAAT	TRCN0000085863	Tead1	6.70302	6.67049	6.54862	6.67363	#NUM!	3.316	3.00212	3.91511	4.05442	4.60328	4.22797		6.68675	6.61112	3.41108	4.29522	3.27567	2.3159
CCTCACTTGTTTGCCGTGTTA	TRCN0000086218	Asb8	7.81341	7.69803	7.78062	7.66679	#NUM!	7.98147	8.42455	7.71847	7.24989	7.59976	7.53659		7.75572	7.72371	8.0415	7.46208	-0.285772	0.261629
GTCAGCATCCTTCTTGATTAT	TRCN0000086220	Asb8	10.5861	10.4907	10.5303	10.4781	#NUM!	10.495	10.6382	10.4981	11.2325	11.2929	11.1452		10.5384	10.5042	10.5438	11.2235	-0.00533439	-0.719377
GCAGCTAATCTTGCTGCACAA	TRCN0000086304	Pnpla7	12.3957	12.238	12.2319	12.271	#NUM!	13.4603	13.4101	13.5172	13.2541	13.2278	13.2128		12.3169	12.2514	13.4625	13.2316	-1.14562	-0.98016
CCGTACCGAATCCTTTATCAA	TRCN0000087770	Tbc1d9	10.5358	10.5615	10.6478	10.5199	#NUM!	9.18412	8.61565	8.89048	9.6412	9.4571	9.32159		10.5486	10.5838	8.89675	9.4733	1.6519	1.11055
GCTCTGTAAGACCATGTACAA	TRCN0000087771	Tbc1d9	10.4296	10.4924	10.4567	10.4685	#NUM!	8.70237	8.33493	8.61125	7.86478	8.45585	8.27147		10.461	10.4626	8.54952	8.19737	1.91149	2.26525
GCAGAGAAATTTCACAGCAAA	TRCN0000087863	Gspt2	10.7401	10.7154	10.7173	10.7038	#NUM!	10.119	9.83059	9.35855	9.75138	9.93133	10.056		10.7278	10.7106	9.76937	9.91291	0.958397	0.797666
GCCTTAGATACAAACCAGGAA	TRCN0000087866	Gspt2	4.06705	3.70144	4.04714	3.47268	#NUM!	1.342	1.63837	5.09265	2.20582	4.30032	5.74512		3.88425	3.75991	2.69101	4.08375	1.19324	-0.323844
CGACAGCAAGTCAGAACCTTA	TRCN0000088224	Evi5	9.86736	9.73715	9.66291	9.77487	#NUM!	9.35223	10.0811	9.59216	8.98945	8.97556	8.66922		9.80225	9.71889	9.67515	8.87808	0.127103	0.840815
GAAGCCATTATGGGTTTGAAA	TRCN0000088227	Evi5	9.84781	9.56831	9.53047	9.62419	#NUM!	8.21104	8.38736	8.13704	8.102	8.40114	8.5001		9.70806	9.57733	8.24515	8.33441	1.46292	1.24292
ACCAGGAAGGATTGGGTTATA	TRCN0000088285	Gpank1	10.8569	10.8802	11.0154	10.8885	#NUM!	9.18726	9.27841	9.34964	9.75138	10.1454	9.93646		10.8686	10.952	9.27177	9.94442	1.59678	1.00755
GCTCATTACCTCAGCTACTTA	TRCN0000088406	Anapc5	10.5662	10.6444	10.5486	10.5728	#NUM!	10.1346	10.1581	10.1347	10.5602	10.6061	10.6427		10.6053	10.5607	10.1425	10.603	0.46283	-0.0422886
CTGAAGGATATGGAACAATTT	TRCN0000088407	Anapc5	11.0136	11.1409	11.1616	11.1306	#NUM!	9.42091	9.5517	9.34087	9.97768	9.91027	9.88742		11.0772	11.1461	9.43783	9.92512	1.63942	1.22095
CCAATCGCAAGGATTCTTCTT	TRCN0000088436	Ciz1	10.5849	10.6888	10.64	10.653	#NUM!	10.418	10.2787	10.6736	11.1532	10.8961	11.1357		10.6369	10.6465	10.4568	11.0617	0.18011	-0.415149
CCCAATCGCAAGGATTCTTCT	TRCN0000088437	Ciz1	9.75609	9.85157	9.83952	9.75808	#NUM!	9.4988	9.07276	9.38968	10.1622	10.2238	10.4711		9.80383	9.7988	9.32041	10.2857	0.483419	-0.486887
CCAACCTCATTGACAGGCATT	TRCN0000088793	Baiap2l1	8.22325	8.15716	8.19664	8.15857	#NUM!	6.70582	7.00058	6.26594	6.89369	6.6133	6.71655		8.1902	8.17761	6.65745	6.74118	1.53276	1.43643
GCCAGTCACATACACTACTAT	TRCN0000088796	Baiap2l1	7.81097	7.76631	7.74758	7.73048	#NUM!	5.23508	4.70066	5.90865	5.3167	5.17884	4.83243		7.78864	7.73903	5.28146	5.10932	2.50717	2.6297
GCCCTTCCATCAGGATTAAAT	TRCN0000088798	Tab1	9.82951	9.73632	9.70518	9.71606	#NUM!	10.0518	10.0149	9.96392	10.5295	10.3579	10.3985		9.78291	9.71062	10.0102	10.4286	-0.227316	-0.718012
GCGATGATTGACACCGAGTTT	TRCN0000088799	Tab1	10.7343	10.5646	10.4322	10.5504	#NUM!	10.9814	11.1229	11.119	10.6921	10.7577	10.9019		10.6494	10.4913	11.0744	10.7839	-0.42498	-0.292575
CCAGGAGAATACCAACACATT	TRCN0000088805	Akap12	11.0972	11.2514	11.3156	11.2694	#NUM!	9.56574	9.56833	9.40534	9.65486	9.53856	9.83515		11.1743	11.2925	9.51314	9.67619	1.66117	1.6163
GCAGAGTCCATCCCAATAATA	TRCN0000088807	Akap12	10.6071	10.5653	10.5716	10.6147	#NUM!	7.54796	8.53675	8.91993	8.33541	8.82043	8.88209		10.5862	10.5932	8.33488	8.67931	2.2513	1.91385
GCCTTAAAGGAGTTGGAGCAA	TRCN0000088810	Ikbkg	10.5947	10.5662	10.5248	10.5509	#NUM!	10.5123	10.7724	10.5171	10.3251	10.4317	10.6294		10.5805	10.5379	10.6006	10.4621	-0.0201455	0.0757986
GTAGCCAAACAGGAATTGATT	TRCN0000088811	Ikbkg	10.6634	10.5585	10.5386	10.55	#NUM!	12.4945	12.0128	12.5946	11.2603	11.2926	11.3711		10.6109	10.5443	12.3673	11.308	-1.75634	-0.763697
GCACTACCTGTGTGGAAGATA	TRCN0000089560	Cldn6	10.2823	10.3688	10.3608	10.3959	#NUM!	10.7526	10.7281	10.7232	10.7702	10.8263	10.5896		10.3255	10.3784	10.7346	10.7287	-0.409123	-0.350366
CAGACATTACATGGCCTGCTA	TRCN0000089561	Cldn6	10.0425	10.0295	10.0016	10.0864	#NUM!	10.0974	9.90633	10.1679	9.25792	9.60842	9.31066		10.036	10.044	10.0572	9.39233	-0.0211994	0.651687
GCTGCTTAGATCCCTCAGCTT	TRCN0000090068	Tubb5	9.98021	9.8596	9.79945	9.85488	#NUM!	10.0798	10.4175	10.1477	9.98624	9.85216	9.4691		9.9199	9.82716	10.215	9.76917	-0.295096	0.0579949
GACCGAATCTCTGTGTACTAT	TRCN0000090070	Tubb5	10.7218	10.4865	10.4784	10.5277	#NUM!	10.2776	10.7503	10.327	9.7338	9.89537	9.94271		10.6042	10.5031	10.4516	9.85729	0.152538	0.645796
CCGTCAGGTCTATGGCTTAAA	TRCN0000091074	Evl	7.5849	7.47337	7.65936	7.57482	#NUM!	6.57287	6.68918	6.47262	8.888	8.60052	7.81936		7.52913	7.61709	6.57823	8.43596	0.950907	-0.818864
CCTCATGGAAGAAATGAACAA	TRCN0000091075	Evl	10.7545	10.8702	10.8938	10.8199	#NUM!	10.7873	10.4976	10.6674	10.9937	10.7917	10.6329		10.8124	10.8569	10.6508	10.8061	0.161613	0.0507213
CCAATGAATATCTCCTAGCTT	TRCN0000091095	Katnb1	11.2864	11.5163	11.4623	11.4425	#NUM!	11.5837	11.3793	11.387	11.3755	11.4422	11.5617		11.4014	11.4524	11.45	11.4598	-0.0486576	-0.00739052
GCGCAGTAATTTCTACATTAA	TRCN0000091203	Epb4.1l2	10.5055	10.6311	10.5502	10.5601	#NUM!	9.5163	9.42147	9.18979	10.1956	10.477	10.4377		10.5683	10.5551	9.37585	10.3701	1.19241	0.185072
CCGATTGTCATCATCAAGCAA	TRCN0000091315	Scin	10.8031	10.7889	10.6793	10.7309	#NUM!	11.4025	11.0302	11.1836	11.2789	10.937	11.1514		10.796	10.7051	11.2054	11.1224	-0.40941	-0.41734
GCTACATTATCCTCTACACTT	TRCN0000091316	Scin	10.9077	11.0266	11.0032	11.0294	#NUM!	10.3877	10.739	10.7136	10.5264	10.6224	10.6889		10.9671	11.0163	10.6134	10.6126	0.353725	0.403725
GCATACAATTTACAGGCATTT	TRCN0000091688	Mkln1	10.7894	10.9026	10.937	10.8856	#NUM!	8.78138	8.9134	8.93985	10.5626	10.1528	10.1473		10.846	10.9113	8.87821	10.2876	1.96778	0.623724
GCATGACAAATTGGTGTTAAA	TRCN0000091691	Mkln1	10.6243	10.6563	10.7298	10.6904	#NUM!	9.49319	9.4256	9.74287	10.1621	10.0432	10.5627		10.6403	10.7101	9.55389	10.256	1.08639	0.454073
GAGATTCAAGAGAAGGGCTTT	TRCN0000091729	Ivl	9.19633	9.08921	8.97474	9.02793	#NUM!	10.1168	10.1488	10.4517	9.95068	10.0047	10.1012		9.14277	9.00134	10.2391	10.0189	-1.09635	-1.01752
GCCAGAATTACACCTAGGAAA	TRCN0000091730	Ivl	11.0946	11.0641	11.0726	11.1159	#NUM!	11.3376	11.136	11.4487	11.2994	11.4116	11.3007		11.0794	11.0942	11.3075	11.3372	-0.228106	-0.242973
CGTTAGTTAGAATGAGGGTTT	TRCN0000091813	Tmod3	12.6846	12.6907	12.7495	12.7262	#NUM!	13.542	13.6564	13.5408	13.3957	13.4006	13.452		12.6877	12.7378	13.5797	13.4161	-0.892049	-0.678273
GCCATCACCAAGGCTCAGAAA	TRCN0000093051	Hist3h2ba	9.50433	9.39243	9.30237	9.39723	#NUM!	8.66296	8.46604	8.07282	8.74171	9.19876	9.27158		9.44838	9.3498	8.40061	9.07068	1.04777	0.279116
GAGCTACTCCATCTACGTGTA	TRCN0000093052	Hist3h2ba	7.58919	7.21907	7.29598	7.24603	#NUM!	7.67291	8.95312	8.06001	7.63687	7.61927	7.47318		7.40413	7.27101	8.22868	7.57644	-0.824553	-0.305434
GCACAAGTTCTGGATAAGTTT	TRCN0000093430	Asap1	11.2615	11.2552	11.2417	11.2156	#NUM!	9.60098	9.60348	9.60236	9.27353	9.65703	9.54206		11.2583	11.2287	9.60227	9.49087	1.65604	1.73779
CCTGAATGTATCCGTGATCTT	TRCN0000093501	Sypl	12.4806	12.5834	12.5502	12.5689	#NUM!	12.689	12.6521	12.7077	12.4523	12.4921	12.5687		12.532	12.5596	12.683	12.5043	-0.150937	0.0552576
CCACACAGTGTTTCACTCAAT	TRCN0000093612	Vapa	11.0247	11.2017	11.1821	11.1057	#NUM!	10.6561	10.7106	10.296	10.52	10.6984	10.3866		11.1132	11.1439	10.5542	10.535	0.558988	0.608922
ACAGATGTAGTCACTACAAAT	TRCN0000093613	Vapa	10.9332	11.0259	11.054	11.0695	#NUM!	10.3133	10.1747	10.494	11.0088	10.7679	10.9131		10.9796	11.0618	10.3273	10.8966	0.65223	0.16518
CCTGTCCATCTCACAGTCAAA	TRCN0000093809	Dpm2	9.72883	9.79808	9.82185	9.77646	#NUM!	8.50331	8.50946	8.65545	9.07674	9.10271	9.18513		9.76345	9.79915	8.55607	9.12153	1.20738	0.677626
GCATGTCATCCACAAATACTT	TRCN0000093812	Dpm2	11.2441	11.3234	11.2977	11.2856	#NUM!	10.0402	9.94959	10.0976	9.81259	9.80435	9.59313		11.2837	11.2917	10.0291	9.73669	1.2546	1.55497
CGTCACATTTCGCTCTCTGTA	TRCN0000094379	Pcdhb22	10.2379	10.0547	10.0799	10.088	#NUM!	10.2074	10.3611	10.3189	10.6961	10.3955	10.2421		10.1463	10.084	10.2958	10.4446	-0.149543	-0.360613
GCCTATGATGAACCTTGGTTA	TRCN0000095087	Setbp1	12.7989	12.8318	12.8003	12.792	#NUM!	11.6729	11.7472	11.7773	12.3125	12.3674	12.3371		12.8154	12.7961	11.7325	12.339	1.08289	0.457176
GCTGGATAAGAAGACCATCAA	TRCN0000095088	Setbp1	10.7996	10.817	10.8324	10.8356	#NUM!	10.0054	10.2063	10.3721	10.7979	10.6827	10.7804		10.8083	10.834	10.1946	10.7537	0.613728	0.0803474
GTGTTCGCTTTGAACCAGGAA	TRCN0000095177	Npas1	9.71091	9.40554	9.38935	9.4584	#NUM!	10.363	10.1152	10.5067	10.5587	10.2632	10.8026		9.55822	9.42387	10.3283	10.5415	-0.770106	-1.11763
GCAATGCTGAAGGTAGTCAAA	TRCN0000095178	Npas1	10.916	10.9193	10.9211	10.9413	#NUM!	10.3803	10.3016	10.1812	10.4985	10.6645	10.8719		10.9176	10.9312	10.2877	10.6783	0.629972	0.252926
GTTCTTGAACAACACCACTAA	TRCN0000095427	Tfap2b	10.2515	10.2549	10.2296	10.2792	#NUM!	9.07125	9.25989	9.71493	10.5764	10.5703	10.2238		10.2532	10.2544	9.34869	10.4568	0.904482	-0.202433
GCAACTTTGCACGCTTCATTA	TRCN0000095451	Setd1b	10.9322	10.7421	10.6716	10.7125	#NUM!	8.56427	8.63306	9.06074	10.4201	10.3419	10.3795		10.8372	10.6921	8.75269	10.3805	2.08448	0.311537
CCAGATTGATTCAGACATCGA	TRCN0000095453	Setd1b	10.4797	10.5327	10.534	10.567	#NUM!	10.1964	10.569	10.2303	10.7497	10.9535	10.668		10.5062	10.5505	10.3319	10.7904	0.174301	-0.239922
GCACATTCAATGGCAGGAAAT	TRCN0000095474	Zfp810	11.2153	11.2038	11.199	11.2261	#NUM!	10.2802	10.6709	10.4181	10.2938	10.0959	10.17		11.2096	11.2125	10.4564	10.1865	0.75317	1.026
GCTTTCTACTGTAATTCACAA	TRCN0000095478	Zfp810	11.5256	11.5457	11.5569	11.5502	#NUM!	11.5847	11.9765	11.7215	11.5916	11.489	11.5324		11.5357	11.5536	11.7609	11.5377	-0.225182	0.015892
GCTCTTTCAGCACAAGAAGAT	TRCN0000095802	Zfp422	10.5565	10.525	10.4421	10.4663	#NUM!	8.58211	8.95246	8.46512	8.59348	8.5856	8.82104		10.5408	10.4542	8.66656	8.6667	1.8742	1.78751
GCCAGGTAAAGGGAGCCACTT	TRCN0000095803	Zfp422	9.57448	9.39032	9.45673	9.42536	#NUM!	8.2759	8.60144	8.49505	9.871	10.4801	10.1034		9.4824	9.44105	8.45746	10.1515	1.02494	-0.710425
CTCCAGATACCCAATGGATTT	TRCN0000096053	Smad7	9.20334	9.24031	9.32181	9.24431	#NUM!	7.43097	8.24592	7.48026	8.67459	8.93163	9.09405		9.22182	9.28306	7.71905	8.90009	1.50277	0.382969
GCACTGCTAGTGCAAGAACTT	TRCN0000096165	Sra1	10.2306	10.2191	10.2071	10.1782	#NUM!	8.08947	7.94591	7.73772	9.6341	9.48122	9.9923		10.2248	10.1927	7.92437	9.70254	2.30046	0.490143
GCTGTTGTTAAGACCAATGCA	TRCN0000096791	Ddx19b	9.84841	9.7933	9.79072	9.77686	#NUM!	9.33635	8.86351	9.07786	9.67054	9.67303	9.9243		9.82085	9.78379	9.09257	9.75596	0.728281	0.0278298
GCGATGTGTCTTGAGCTAATA	TRCN0000096809	Eif4g1	10.3947	10.3674	10.2771	10.325	#NUM!	6.2106	6.50365	6.46531	6.03471	6.65557	5.81048		10.3811	10.301	6.39319	6.16692	3.98789	4.13412
GCTGTATGAAACACTAGAATT	TRCN0000096811	Eif4g1	10.6553	10.8096	10.794	10.7826	#NUM!	8.09974	7.87397	7.90461	7.20446	7.55164	8.05491		10.7324	10.7883	7.95944	7.60367	2.77297	3.18461
GCATCAATGAACTGATGGATA	TRCN0000096839	Eif3c	10.6391	10.7236	10.7467	10.7356	#NUM!	6.86444	6.61633	6.46677	6.03623	6.40662	7.1888		10.6814	10.7412	6.64918	6.54388	4.03219	4.19728
GTACTACAAGTTTGACTACAA	TRCN0000096842	Eif3c	11.3298	11.4159	11.4624	11.4055	#NUM!	7.25745	7.0671	6.974	7.47416	6.32733	6.90385		11.3729	11.434	7.09952	6.90178	4.27335	4.53218
CCGCATCTATGACCTCAACAT	TRCN0000097165	Nck2	9.882	9.84041	9.81421	9.84583	#NUM!	9.22442	8.5833	8.65111	9.11144	8.98773	9.14098		9.8612	9.83002	8.81961	9.08005	1.04159	0.749963
CCCTGAATGGTGGAAATGCAA	TRCN0000097166	Nck2	9.81798	9.88604	9.97274	9.86649	#NUM!	8.99702	8.99657	9.23629	9.43138	9.43625	9.82735		9.85201	9.91961	9.07662	9.56499	0.775385	0.354621
CCTGGACACTACCACCTTAAT	TRCN0000097200	Crkl	11.1341	11.2213	11.3192	11.2121	#NUM!	10.1584	10.1382	10.3569	10.1116	10.4621	10.3402		11.1777	11.2657	10.2178	10.3046	0.959879	0.961026
GCGTTTGGAGAAGGACAGATT	TRCN0000097211	Cryab	9.52163	9.2977	9.25142	9.32741	#NUM!	8.22943	8.63705	8.02189	9.14878	8.98831	8.9883		9.40967	9.28941	8.29612	9.0418	1.11354	0.247618
TCACTGTGAATGGACCAAGGA	TRCN0000097212	Cryab	10.1961	10.214	10.3606	10.2342	#NUM!	10.137	9.87185	10.763	10.985	10.7852	11.0718		10.2051	10.2974	10.2573	10.9473	-0.0522213	-0.649938
GCTGGTAATACCAAACCTCAT	TRCN0000097370	Nsun4	10.5291	10.5979	10.6301	10.5914	#NUM!	9.99695	9.89895	10.1486	9.97356	10.146	10.1077		10.5635	10.6108	10.0148	10.0758	0.548654	0.534998
GCGGAGATATCGATATAAGAA	TRCN0000097371	Nsun4	12.503	12.6034	12.557	12.5676	#NUM!	13.6348	13.3591	13.4083	13.1483	13.1707	13.2308		12.5532	12.5623	13.4674	13.1833	-0.914202	-0.620963
GCTGTCAGATGTCCACCTGTA	TRCN0000097457	Mettl22	9.9114	9.8143	9.81548	9.80787	#NUM!	9.87143	10.144	10.2134	10.2508	10.5462	10.6275		9.86285	9.81168	10.0763	10.4748	-0.213427	-0.663136
CACACCGTTTATTGTACAGAT	TRCN0000097458	Mettl22	10.8767	10.9492	10.9649	10.9717	#NUM!	10.2442	10.0252	10.1596	10.6277	10.7897	10.6772		10.913	10.9683	10.143	10.6982	0.769954	0.270073
CCGTCTCTTGAGGATACATTT	TRCN0000097656	Mbtd1	10.036	10.0443	10.1049	10.0229	#NUM!	9.57039	10.1469	9.75596	9.23899	9.67912	9.46169		10.0401	10.0639	9.82442	9.45993	0.215721	0.60398
GAGATCAGATATTACGAAGAA	TRCN0000097658	Mbtd1	10.6542	10.627	10.5938	10.6612	#NUM!	9.61213	9.77567	9.72239	9.72306	9.56214	9.85911		10.6406	10.6275	9.70339	9.71477	0.937241	0.912714
CCAGATGTACTCTACTACATT	TRCN0000097981	Qrich1	10.6621	10.8596	10.8612	10.8279	#NUM!	9.81447	10.2412	9.94997	10.6878	10.66	10.9391		10.7608	10.8445	10.0019	10.7623	0.758932	0.0822561
CCCAGATGTACTCTACTACAT	TRCN0000097983	Qrich1	11.226	11.4161	11.4362	11.4149	#NUM!	11.4096	11.4336	11.1228	11.5318	11.4017	11.5236		11.321	11.4256	11.322	11.4857	-0.000934255	-0.0600944
GAGAACGTGTTCGAGTCTCTA	TRCN0000098773	Mrpl24	10.9394	10.664	10.6144	10.6751	#NUM!	9.08563	9.11208	9.3862	10.0672	9.91199	10.3918		10.8017	10.6448	9.19464	10.1237	1.60703	0.521109
CCGATACATTGGCAGAACCAA	TRCN0000098774	Mrpl24	10.8263	10.9068	10.9221	10.8982	#NUM!	10.6043	10.8024	10.3507	10.2644	10.1474	10.4673		10.8666	10.9102	10.5858	10.293	0.280797	0.617125
GCAGATCCTGAAAGCCAAGTT	TRCN0000098852	Mrpl42	9.58203	9.38662	9.4734	9.44447	#NUM!	8.32784	8.5539	8.3541	7.41263	7.65218	7.38392		9.48433	9.45894	8.41195	7.48291	1.07238	1.97603
CCAGATCTTCTGCATAATAAT	TRCN0000098854	Mrpl42	10.916	10.9663	11.0266	11.008	#NUM!	9.47578	9.54677	9.5507	9.30409	9.32733	9.34129		10.9411	11.0173	9.52442	9.32424	1.4167	1.69305
GAGTTCTATGTTGGAAGCATA	TRCN0000099001	Mrpl19	10.1739	9.96504	9.91854	9.99043	#NUM!	9.33473	10.1294	9.85119	10.17	10.0598	10.1039		10.0695	9.95449	9.77177	10.1112	0.297703	-0.156749
GAAGCTGCATTGTGGGAAGAA	TRCN0000099004	Mrpl19	11.1396	10.8321	10.8313	10.8951	#NUM!	9.29068	9.90005	9.5007	10.3741	10.1893	10.343		10.9858	10.8632	9.56381	10.3022	1.42204	0.561071
GCTTGACAATCAACCGCTTTA	TRCN0000099066	Mrpl16	12.2058	12.1604	12.1217	12.1512	#NUM!	11.3067	11.423	11.6029	11.3868	11.6549	11.631		12.1831	12.1365	11.4442	11.5576	0.738903	0.578878
CCCTGAAAGGTCCAAGCTTAA	TRCN0000099067	Mrpl16	9.6286	9.63218	9.67808	9.6286	#NUM!	7.43664	7.90819	7.40773	8.24775	8.46251	8.03217		9.63039	9.65334	7.58418	8.24748	2.0462	1.40586
CCCTACACCAACGGAATCATT	TRCN0000099247	Agpat6	9.9031	10.02	10.0612	9.98735	#NUM!	8.42832	8.7926	8.50507	10.1188	9.79844	9.89657		9.96153	10.0243	8.57533	9.93795	1.3862	0.0863217
TCTGGATTACATCCGATTTAA	TRCN0000099253	Fmo9	12.706	12.8085	12.8978	12.8488	#NUM!	13.9559	14.0414	13.9683	13.673	13.5718	13.5389		12.7573	12.8733	13.9885	13.5946	-1.23124	-0.721311
CCTGAGATAGATGAGACCATT	TRCN0000099465	Mrp63	10.3793	10.4721	10.5574	10.513	#NUM!	10.9704	11.1057	11.7945	10.7428	10.9393	10.9822		10.4257	10.5352	11.2902	10.8881	-0.864495	-0.352884
GCATAGATACATTGCAGACCA	TRCN0000099467	Mrp63	11.45	11.513	11.5157	11.5173	#NUM!	11.3893	11.4032	11.3242	10.7991	10.9917	10.7944		11.4815	11.5165	11.3722	10.8618	0.109286	0.654767
CGCAAGCACAAATTCTTCTAA	TRCN0000099578	Med1	12.066	12.0161	11.9667	12.0039	#NUM!	12.6925	12.5724	12.7696	12.8566	12.7465	12.794		12.0411	11.9853	12.6782	12.799	-0.637088	-0.813725
GAGAGAGAAGACATACACTTT	TRCN0000099597	Rpp38	11.8968	11.9129	11.9083	11.893	#NUM!	10.0101	10.7375	10.4138	10.1943	10.459	10.2916		11.9049	11.9006	10.3871	10.315	1.51775	1.58564
GCTCATTCCCAACCCTAGTAA	TRCN0000099598	Rpp38	9.92814	9.96999	9.98583	9.98941	#NUM!	8.8985	9.06809	9.19908	10.4743	10.5293	10.5768		9.94907	9.98762	9.05522	10.5268	0.893842	-0.539169
GCCTCTTTACAGTACACTAAT	TRCN0000099640	Wasl	10.3531	10.3906	10.4102	10.4405	#NUM!	9.40712	9.96103	9.99377	10.0962	10.1219	10.4385		10.3718	10.4253	9.78731	10.2189	0.584524	0.206456
AGATTAACCAAGGCAGATATT	TRCN0000099643	Wasl	10.2331	10.2727	10.2324	10.2831	#NUM!	8.26808	8.24723	8.49002	8.03966	8.76784	8.28192		10.2529	10.2578	8.33511	8.36314	1.91781	1.89463
GCACACACAGATGAAGCTCTT	TRCN0000099812	Bcap29	11.095	11.1309	11.1207	11.1363	#NUM!	10.0481	9.84244	10.193	10.4705	10.4984	10.334		11.1129	11.1285	10.0278	10.4343	1.08508	0.694217
TCAGAACTTCAGAACCGTTTA	TRCN0000099813	Bcap29	10.256	10.2836	10.2329	10.2506	#NUM!	9.32774	9.5631	9.69561	9.8266	10.0757	10.2788		10.2698	10.2418	9.52882	10.0604	0.740955	0.181381
GCCTCTGATGGATTCTGCATT	TRCN0000100176	Ly6c1	10.1102	9.97317	9.9793	10.0088	#NUM!	9.61646	9.79951	10.0831	10.5891	10.5049	10.2649		10.0417	9.99405	9.83303	10.453	0.208655	-0.458919
GAATTGATTGAGGACTCTCAA	TRCN0000100177	Ly6c1	12.347	12.3387	12.3404	12.3536	#NUM!	11.1898	11.3315	11.2213	12.1916	12.1445	12.0241		12.3429	12.347	11.2475	12.1201	1.09533	0.226905
GCTTTCTAATTCCACACAGAT	TRCN0000100790	Sar1b	10.6139	10.5751	10.573	10.6149	#NUM!	8.84426	10.0595	8.50614	8.37031	8.75298	8.70684		10.5945	10.5939	9.13664	8.61004	1.45786	1.98389
TGCAGTTTCTAGGATTGTATA	TRCN0000100794	Sar1b	7.93965	7.96929	8.00637	7.94912	#NUM!	7.14705	7.33104	7.49541	7.58099	7.49699	7.71491		7.95447	7.97774	7.3245	7.59763	0.62997	0.380116
GCTGCTTGTAAGTCCACATAT	TRCN0000100845	Ap4b1	0	0	0	0	#NUM!	0	0	0	0	0	0		0	0	0	0	0	0
CCAAGACTTACACAGATCAAT	TRCN0000100849	Ap4b1	11.2937	11.4669	11.4474	11.4111	#NUM!	10.7283	10.5481	10.6161	11.5178	11.6316	11.4579		11.3803	11.4293	10.6308	11.5358	0.749459	-0.106524
GAAAGCTACATCAGCACAATT	TRCN0000100862	Rab1	12.597	12.4131	12.4084	12.4846	#NUM!	14.354	14.1747	14.1823	13.7668	13.769	13.8943		12.505	12.4465	14.237	13.81	-1.73197	-1.36351
CGTCACAGAAAGTATAGTGAA	TRCN0000101247	Nktr	10.6183	10.6679	10.6444	10.647	#NUM!	11.0137	10.6962	11.1761	10.9045	10.8648	10.711		10.6431	10.6457	10.962	10.8268	-0.31892	-0.181134
GCCAGTTAAGACAGAACCTTT	TRCN0000101248	Nktr	10.4002	10.4201	10.3689	10.4256	#NUM!	9.22235	9.19668	9.05989	9.5676	9.96299	10.0694		10.4101	10.3972	9.15964	9.86667	1.25051	0.530559
CTCCACAATAACCAACATCAT	TRCN0000101286	Ifi27l2b	11.9587	12.0655	12.0669	12.0523	#NUM!	9.63637	9.81337	9.91853	10.4266	10.2994	10.257		12.0121	12.0596	9.78942	10.3277	2.22265	1.73194
CTCCACATCAACCAATATCAT	TRCN0000101289	Ifi27l2b	10.5678	10.6464	10.6603	10.6024	#NUM!	7.8307	8.15407	7.65272	8.46682	8.58229	8.45404		10.6071	10.6313	7.87916	8.50105	2.72793	2.13028
GCCCTACTGATGAATTATCTT	TRCN0000101668	Nsf	11.5562	11.6285	11.564	11.5539	#NUM!	6.57425	8.16585	6.30743	8.60984	8.77745	8.34585		11.5923	11.5589	7.01584	8.57771	4.57649	2.98123
GCCAGAAATCCTTAACAAGTA	TRCN0000101669	Nsf	10.4805	10.5484	10.5964	10.5634	#NUM!	6.7938	6.03775	6.00459	8.02109	8.58687	7.44219		10.5144	10.5799	6.27871	8.01672	4.23571	2.56314
CCACTTATCCACACTGAAGTT	TRCN0000101729	Atp13a5	12.49	12.6041	12.6217	12.5962	#NUM!	12.5787	12.8868	12.7192	13.3422	13.3744	13.1598		12.5471	12.609	12.7282	13.2922	-0.181184	-0.683194
ACTACTATGTATGGCGTGATA	TRCN0000102107	Tspo	10.895	10.9895	11.0269	10.9794	#NUM!	9.54561	10.1967	9.37229	9.99534	9.8201	10.0079		10.9422	11.0032	9.70488	9.9411	1.23737	1.06207
TGGCTCCTACATAGTCTGGAA	TRCN0000102108	Tspo	9.24605	8.85463	8.8961	8.95964	#NUM!	10.5148	10.8189	10.5585	10.6945	10.7674	10.408		9.05034	8.92787	10.6307	10.6233	-1.58038	-1.69545
GAGCATAAACAGAGGCGGCAT	TRCN0000102312	Alyref	11.6193	11.1562	11.1057	11.255	#NUM!	12.9385	13.0622	12.9761	12.9698	12.9091	13.049		11.3878	11.1804	12.9923	12.976	-1.60452	-1.79559
CCAAGGCTTACACAGAAAGTA	TRCN0000102390	Iars2	12.3055	12.4043	12.412	12.4068	#NUM!	11.4061	11.5552	11.2662	11.5821	11.9367	11.5753		12.3549	12.4094	11.4092	11.698	0.945749	0.711376
CCGATAAAGTGTCTCCTCTTT	TRCN0000102394	Iars2	11.0788	11.1761	11.2261	11.1653	#NUM!	11.1552	11.0831	11.1269	10.993	11.3544	11.2336		11.1274	11.1957	11.1217	11.1937	0.00573013	0.00199963
GCAGAAATCATCGTCAAGATT	TRCN0000102600	Puf60	14.1135	14.1103	14.084	14.1032	#NUM!	14.8348	14.6504	14.6936	14.6559	14.4814	14.6083		14.1119	14.0936	14.7263	14.5819	-0.614372	-0.488319
GCTGAACAACAATGACGGAAA	TRCN0000102971	Chrnb1	10.2515	10.2321	10.2276	10.1982	#NUM!	9.97324	10.3335	9.79236	9.87553	9.89711	9.94823		10.2418	10.2129	10.033	9.90696	0.208749	0.305981
CTGAACCACATCACTCTCTTT	TRCN0000102974	Chrnb1	9.97175	9.89425	9.83983	9.87504	#NUM!	9.6824	9.93347	9.57434	9.98244	9.79195	10.2103		9.933	9.85744	9.73007	9.9949	0.202929	-0.137468
GCCTCAAGAGTGACTTTGAAT	TRCN0000103546	Grhl3	9.39266	9.2898	9.27665	9.32524	#NUM!	8.59128	9.46931	8.6269	9.06249	9.07671	9.35188		9.34123	9.30095	8.89583	9.16369	0.445403	0.137252
CGACTACTATATGGGTCCCAA	TRCN0000103547	Grhl3	9.7841	9.7655	9.79201	9.85111	#NUM!	10.264	10.4188	10.1032	9.95411	10.1569	10.3124		9.7748	9.82156	10.262	10.1411	-0.487214	-0.319584
GCATTGTTCATTGTAGCACTA	TRCN0000103580	Cnot2	10.4903	10.5484	10.5511	10.5301	#NUM!	10.2896	10.2627	9.83184	10.1724	10.3078	10.3335		10.5193	10.5406	10.1281	10.2712	0.391252	0.269378
CGGCAACCCAACTCCATTAAT	TRCN0000103584	Cnot2	9.59914	9.11499	9.16295	9.25973	#NUM!	6.12336	5.79289	6.45722	7.13709	7.44075	7.69308		9.35706	9.21134	6.12449	7.42364	3.23257	1.7877
GCCATTGAGCTTCCAATAGAT	TRCN0000103641	Hnrnpab	12.6866	12.6749	12.6525	12.6365	#NUM!	13.1825	13.2166	13.2476	12.7195	12.6941	12.787		12.6807	12.6445	13.2156	12.7335	-0.53484	-0.0890434
GCTGTGATTCTCCACTGAAAT	TRCN0000103750	Ddx3x	10.7794	10.6929	10.7857	10.6988	#NUM!	9.95782	10.2359	10.9098	10.4932	10.724	10.5477		10.7362	10.7422	10.3678	10.5883	0.368342	0.1539
ACGTTCTAAGAGCAGTCGATT	TRCN0000103754	Ddx3x	11.4759	11.38	11.3774	11.4117	#NUM!	11.6874	11.755	11.7696	11.8561	11.8566	11.9484		11.4279	11.3946	11.7373	11.8871	-0.309405	-0.492485
GATCTATGACATATTCCAGAA	TRCN0000104076	Eif4a1	10.9709	11.0758	11.0608	11.0819	#NUM!	8.91767	9.04452	9.32884	10.0871	10.1116	10.1087		11.0234	11.0714	9.09701	10.1024	1.92637	0.968921
GCGAGCTATTCTTCCTTGTAT	TRCN0000104077	Eif4a1	9.94914	9.86682	9.83606	9.90585	#NUM!	9.48274	9.18957	9.21486	9.81232	9.96671	10.017		9.90798	9.87096	9.29572	9.93201	0.612256	-0.061049
CGTAGAGCTTTATGCAGAGAA	TRCN0000104305	Rps3	10.0937	10.0873	10.1091	10.1752	#NUM!	4.54027	4.7628	4.48569	1.80875	4.14887	3.56746		10.0905	10.1421	4.59625	3.17502	5.49423	6.96713
CAACCAGGACAGAAATCATTA	TRCN0000104309	Rps3	7.50395	7.64595	7.58349	7.6286	#NUM!	2.82004	2.44573	1.42968	-0.2645	1.8968	0.935188		7.57495	7.60604	2.23182	0.855831	5.34313	6.75021
CCCACTTGTTAAGACAGTGTT	TRCN0000104365	Mrpl39	10.5757	10.6972	10.6995	10.7023	#NUM!	9.60803	9.67034	9.95128	10.3082	10.4478	10.5247		10.6365	10.7009	9.74322	10.4269	0.893246	0.274
GCGCTGGAAATATTTCAACAT	TRCN0000104369	Mrpl39	11.0811	10.9519	10.8955	10.9156	#NUM!	10.7698	11.0507	10.6777	10.7501	10.8849	10.9815		11.0165	10.9056	10.8327	10.8722	0.183734	0.033405
CCAGCATTCATTGTCAACTTA	TRCN0000104461	Mrpl20	12.8814	12.9835	12.9638	12.9671	#NUM!	13.0364	13.0737	13.0832	12.9513	12.9019	12.8822		12.9324	12.9654	13.0644	12.9118	-0.131979	0.0536412
CCCAGCATTCATTGTCAACTT	TRCN0000104462	Mrpl20	11.6233	11.6723	11.7077	11.653	#NUM!	11.646	11.2562	11.5858	10.3894	10.5218	10.469		11.6478	11.6803	11.496	10.4601	0.151823	1.22025
CGACACCATTCAGATTGATTT	TRCN0000104500	Rps4x	10.9678	10.8702	10.8794	10.9225	#NUM!	6.14105	6.05474	5.56582	5.36243	5.21611	4.69541		10.919	10.9009	5.92053	5.09131	4.99847	5.80962
GCTTTGCTGTTCATCGTATTA	TRCN0000104504	Rps4x	11.299	11.2303	11.1665	11.2036	#NUM!	5.70331	5.85469	5.36042	4.49705	4.6815	4.6384		11.2647	11.185	5.63948	4.60565	5.6252	6.57936
CGACTCCATGTGGACTTATTT	TRCN0000104592	Gca	13.6356	13.4183	13.4766	13.4409	#NUM!	11.6055	11.8376	11.866	12.0561	11.9102	12.2188		13.527	13.4588	11.7697	12.0617	1.75723	1.39703
GACGACTCCATGTGGACTTAT	TRCN0000104593	Gca	9.00101	8.77037	8.71649	8.76129	#NUM!	9.18737	8.98019	9.1227	9.79507	9.66475	9.74431		8.88569	8.73889	9.09676	9.73471	-0.211066	-0.995817
CCCTTACTGGACACACAAGAA	TRCN0000105002	Cln8	11.3901	11.5141	11.5045	11.4801	#NUM!	10.3076	10.3288	10.3888	10.7795	10.9449	10.8787		11.4521	11.4923	10.3417	10.8677	1.11038	0.624611
CACCACCTCTTTGCCTTTCTT	TRCN0000105004	Cln8	10.5534	10.4793	10.4933	10.5025	#NUM!	8.90397	8.74413	8.69146	8.40143	8.63729	8.55889		10.5164	10.4979	8.77985	8.53253	1.73653	1.96536
GTCACTTTCTTTCAAGACCAA	TRCN0000105763	Stac	13.1128	13.0228	13.0563	13.034	#NUM!	13.6931	13.8659	13.7271	13.3682	13.2861	13.3914		13.0678	13.0452	13.762	13.3486	-0.694215	-0.303389
GCACCCATTCACGCCTTGGAA	TRCN0000106105	Sipa1l1	10.0722	9.88341	9.9123	9.90658	#NUM!	10.7009	10.527	10.6093	10.4153	10.5096	10.5822		9.97779	9.90944	10.6124	10.5024	-0.6346	-0.592932
CGCCACTAGCAAATATCTGAT	TRCN0000106109	Sipa1l1	10.2996	10.0573	9.97588	10.0752	#NUM!	9.78805	9.9286	9.77109	10.8865	10.3117	10.346		10.1785	10.0255	9.82924	10.5147	0.349212	-0.489219
GCAAGATGTGTATGTCCATTT	TRCN0000106402	Rnf125	11.5301	11.5974	11.5989	11.5787	#NUM!	11.0034	10.5976	10.9748	10.7437	10.9695	10.9586		11.5638	11.5888	10.8586	10.8906	0.705167	0.698199
AGTACCTTCAATGGCAGTTTA	TRCN0000106404	Rnf125	10.1087	10.0183	10.1012	10.0976	#NUM!	9.55302	10.0223	9.60028	9.16045	9.17817	9.2526		10.0635	10.0994	9.72521	9.19707	0.338275	0.902346
GACGGAAATTGGTAATATGAT	TRCN0000108720	Ipp	10.472	10.4659	10.4883	10.4638	#NUM!	9.85847	9.84194	9.78165	10.4139	10.5688	10.4811		10.4689	10.4761	9.82735	10.4879	0.641582	-0.011869
GCTGTGAGATGCAAGGTTTAA	TRCN0000108724	Ipp	10.6632	10.6337	10.6424	10.6474	#NUM!	8.95183	9.17147	9.30814	9.30512	9.38135	9.44842		10.6485	10.6449	9.14382	9.3783	1.50467	1.26659
GCCCTAATCCAGAATCTTGTA	TRCN0000108782	Diap2	9.38898	9.40136	9.4249	9.44747	#NUM!	8.34401	8.7672	8.98376	8.31434	8.86196	8.87785		9.39517	9.43618	8.69832	8.68472	0.696844	0.751465
GATGGAAGATATGAACCTTAA	TRCN0000108784	Diap2	10.3969	10.4689	10.4881	10.4878	#NUM!	8.00632	7.88853	8.1054	9.00832	8.95937	9.15048		10.4329	10.4879	8.00008	9.03939	2.43283	1.44855
TGGCATTAACACCACGGACAT	TRCN0000108867	Tagln2	10.4568	10.1627	10.1285	10.2182	#NUM!	8.91294	8.87115	9.11642	8.24939	8.49048	8.25102		10.3098	10.1733	8.96683	8.3303	1.34294	1.84305
GAACGTGATTGGGTTGCAGAT	TRCN0000108868	Tagln2	10.0524	9.77442	9.72637	9.80008	#NUM!	8.37994	8.47238	8.55982	8.46964	8.62917	8.39953		9.9134	9.76322	8.47071	8.49945	1.44268	1.26378
GCTGTATGAACAAGTGAATAT	TRCN0000109121	Snrpe	11.2455	11.3945	11.3728	11.4114	#NUM!	6.81831	7.03775	7.74347	6.50534	6.28035	5.17359		11.32	11.3921	7.19984	5.98643	4.12017	5.40563
TGCGGATAGAAGGTTGTATTA	TRCN0000109122	Snrpe	10.2324	10.135	10.121	10.1429	#NUM!	7.27358	6.89076	6.92207	6.72655	6.52165	6.02794		10.1837	10.132	7.0288	6.42538	3.15489	3.70659
GCAAGATCCGATTTCTGATTT	TRCN0000109191	Snrpd3	10.7119	10.6942	10.6234	10.6802	#NUM!	6.73982	8.57864	7.84922	6.38416	6.58407	6.15145		10.703	10.6518	7.72256	6.37322	2.98048	4.27858
GCACAGCTGGAACAGGTATAT	TRCN0000109194	Snrpd3	9.95164	9.9851	9.983	9.9203	#NUM!	3.97343	4.47572	3.4476	2.55993	3.11544	3.08899		9.96837	9.95165	3.96559	2.92146	6.00278	7.03019
GCTAACATGAAGAAACTTCAA	TRCN0000109946	Ppfia3	11.3336	11.4519	11.4258	11.4397	#NUM!	12.0999	12.1282	12.266	11.4057	11.3771	11.0945		11.3928	11.4328	12.1647	11.2924	-0.77195	0.140366
CGGTTACAGCTTCACCTCAAA	TRCN0000109948	Ppfia3	10.4578	10.1897	10.1836	10.2264	#NUM!	10.1554	10.032	10.2656	10.4021	10.5367	10.2593		10.3237	10.205	10.151	10.3994	0.172725	-0.194371
GAGCTTTACATTCCCAACAAT	TRCN0000110097	Cyth2	12.0907	11.7592	11.6777	11.7721	#NUM!	12.4159	12.6581	12.5026	12.2433	12.3793	12.4349		11.925	11.7249	12.5255	12.3525	-0.600561	-0.627569
GAGAAAGATGAGTGGATCAAA	TRCN0000110099	Cyth2	10.1287	9.97774	9.98129	9.99419	#NUM!	9.57099	10.143	9.75701	9.87484	10.1407	9.77226		10.0532	9.98774	9.82367	9.92926	0.229563	0.0584849
GCTGAAATTGTGGCCACACTA	TRCN0000110687	Letm1	10.4168	10.2306	10.1739	10.2518	#NUM!	9.96829	10.4171	10.0511	10.5127	10.4633	10.5083		10.3237	10.2128	10.1455	10.4947	0.178204	-0.281901
GCCTGTAGTTGTGAAGCTCTT	TRCN0000110688	Letm1	11.3	11.2622	11.2461	11.2667	#NUM!	10.9945	11.1018	11.1194	10.3426	10.4027	10.4896		11.2811	11.2564	11.0719	10.4116	0.209204	0.844763
CCTACCGTATCAAGGAGAGAA	TRCN0000110780	Arpc3	10.2818	10.4006	10.5	10.3985	#NUM!	9.07307	8.76523	9.15033	8.26802	8.54929	8.28591		10.3412	10.4493	8.99621	8.36774	1.34498	2.08154
GAGACCAAAGACACGGACATT	TRCN0000110782	Arpc3	9.28886	8.90942	8.91765	9.00981	#NUM!	6.90533	8.06143	7.51715	8.37152	7.91796	7.72015		9.09914	8.96373	7.49463	8.00321	1.60451	0.960522
GCCGAATATGTTGGAAGGAAA	TRCN0000111082	Abcb1a	11.6546	11.6516	11.6164	11.6308	#NUM!	12.185	12.2567	12.4564	11.5805	11.6549	11.8114		11.6531	11.6236	12.2994	11.6823	-0.6463	-0.0586318
CCCACTTATGATGCTGATCTT	TRCN0000111083	Abcb1a	10.4945	10.5942	10.5884	10.5467	#NUM!	9.28869	9.27628	9.32934	9.26639	9.23843	9.22693		10.5443	10.5675	9.2981	9.24392	1.24622	1.32361
CCTAAATTGAATCCCAGAGTA	TRCN0000111245	Chi3l3	13.959	14.0719	14.1143	14.0838	#NUM!	14.8075	14.7534	14.6766	14.7409	14.7982	14.7		14.0155	14.099	14.7458	14.7464	-0.730361	-0.647363
CCATGATGTAGACTTCCTTAT	TRCN0000111387	Polm	10.5298	10.7384	10.7657	10.7057	#NUM!	10.3698	10.2423	10.6671	10.5268	10.355	10.2804		10.6341	10.7357	10.4264	10.3874	0.207752	0.348268
GCGATGAAACACCAAATAGTA	TRCN0000112231	Dnajb4	11.9987	11.9795	11.9426	11.966	#NUM!	11.565	11.7345	11.6155	11.7106	11.8012	11.8331		11.9891	11.9543	11.6383	11.7817	0.350752	0.172637
GCCAACAATGGACGGAAGAAA	TRCN0000112234	Dnajb4	10.3886	10.4011	10.3947	10.4057	#NUM!	10.6692	10.9049	10.5961	11.2603	11.1994	11.2999		10.3948	10.4002	10.7234	11.2532	-0.328583	-0.852975
GCCACCAACAAACTATGTTAA	TRCN0000112325	Sema6d	10.3646	10.4191	10.4055	10.3837	#NUM!	8.63891	9.44573	9.23284	9.64151	9.66631	9.75289		10.3918	10.3946	9.10583	9.68691	1.28599	0.707736
GCCACCAAACACGGATACAAA	TRCN0000112329	Sema6d	9.9458	9.88116	9.94502	9.90549	#NUM!	8.09688	8.1274	8.05271	8.80931	8.89147	9.15375		9.91348	9.92526	8.09233	8.95151	1.82115	0.973749
GCATTGTCTGAAAGAGAACAT	TRCN0000112735	Magee1	10.8521	10.9585	10.8964	10.9284	#NUM!	11.3394	11.427	11.2701	10.6098	10.5433	10.557		10.9053	10.9124	11.3455	10.57	-0.440213	0.342349
GCTAGATGCTTCTGGCTCAAA	TRCN0000112739	Magee1	10.2003	10.2185	10.1438	10.1368	#NUM!	9.36812	9.45225	9.65481	10.1868	10.5299	10.1917		10.2094	10.1403	9.49173	10.3028	0.717666	-0.162494
CGCTGATTACTTCTCCAACTA	TRCN0000113256	Otud5	10.0785	9.88903	9.87177	9.99624	#NUM!	8.86486	8.48902	8.68707	9.5929	9.62336	9.39359		9.98378	9.93401	8.68032	9.53662	1.30346	0.397388
CCGTCATTTAAGCCAGGGTTT	TRCN0000113257	Otud5	10.2175	10.061	10.0641	10.0784	#NUM!	9.80581	9.73253	9.65481	9.62602	9.77978	9.79068		10.1392	10.0713	9.73105	9.73216	0.408186	0.339115
GCCAGAATTGTGCTGACGAAT	TRCN0000113540	Zmym5	9.21402	9.06165	8.95229	8.97495	#NUM!	8.55006	8.31744	8.38097	8.33882	8.41923	8.46657		9.13783	8.96362	8.41615	8.4082	0.72168	0.555415
CTCCAGCAATACCTAATGAAA	TRCN0000113544	Zmym5	11.7237	11.8472	11.8652	11.8175	#NUM!	10.3638	10.3364	10.4056	11.0703	11.1861	11		11.7854	11.8413	10.3686	11.0855	1.41687	0.755829
CTGCTAGGTAACCCTCTCTAT	TRCN0000114431	Car14	11.7566	11.7822	11.8121	11.8155	#NUM!	12.7215	12.5834	12.7193	13.707	13.6138	13.7851		11.7694	11.8138	12.6747	13.702	-0.905325	-1.88816
GATCACATTCTGAGTCGTCTA	TRCN0000114435	Car14	10.2564	10.1848	10.2074	10.2348	#NUM!	9.41604	9.3835	9.35281	10.4023	10.2547	10.9234		10.2206	10.2211	9.38412	10.5268	0.836493	-0.30571
GTGGCTCAGGAGTATTATGAA	TRCN0000115183	Aip	9.47064	9.09181	9.16345	9.16889	#NUM!	9.36892	9.20856	8.97181	8.66931	8.85142	8.90889		9.28123	9.16617	9.1831	8.80987	0.0981307	0.356297
GCTCATCGTTGGCAAGAAGTT	TRCN0000115184	Aip	0	0	0	0	#NUM!	0	0	0	0	0	0		0	0	0	0	0	0
GCAATCAAATGTGAGGACAAA	TRCN0000119868	Eif2s1	13.2381	13.2956	13.3053	13.2754	#NUM!	13.922	13.9772	13.9762	14.1191	14.0564	14.0074		13.2668	13.2903	13.9585	14.061	-0.691659	-0.770646
GATCACTTTAAGTCTACAGAT	TRCN0000119941	Rpa2	10.7872	10.751	10.8023	10.7687	#NUM!	9.11514	8.83602	9.50979	9.49164	9.36055	9.39308		10.7691	10.7855	9.15365	9.41509	1.61545	1.37043
CCAAATGATGTGGAGTTTGAT	TRCN0000119959	Xrn2	10.9898	11.1376	11.0902	11.0795	#NUM!	10.8135	10.4739	10.668	10.5212	10.8806	10.6629		11.0637	11.0849	10.6518	10.6882	0.411939	0.396636
CAACGATACTACAAGAACAAA	TRCN0000119960	Xrn2	10.8786	10.9812	11.0147	10.9775	#NUM!	11.2408	10.8078	11.1181	10.6388	10.6276	10.5982		10.9299	10.9961	11.0556	10.6215	-0.125644	0.374593
GCTGACGTGATTGTGTTATTT	TRCN0000120066	Hacl1	15.2302	15.2556	15.2042	15.2177	#NUM!	16.0934	16.0803	16.031	15.2562	15.2349	15.2877		15.2429	15.2109	16.0683	15.2596	-0.825371	-0.0486564
GCAGTGGTACAGGAACAGTTT	TRCN0000120139	Clybl	9.44564	9.45027	9.48908	9.46728	#NUM!	8.92776	8.69891	8.91296	9.69834	9.84899	10.0296		9.44795	9.47818	8.84655	9.85897	0.601408	-0.380793
CCTGAAGAAATCCGATGGTTT	TRCN0000120140	Clybl	9.78784	9.80601	9.88612	9.82563	#NUM!	11.1124	10.6814	10.9216	9.80372	10.0048	9.99277		9.79693	9.85587	10.9051	9.93375	-1.10822	-0.077876
CCAGTCTATCATCTACAGCAT	TRCN0000120153	Cdhr5	10.4712	10.6192	10.6379	10.6138	#NUM!	9.46399	9.62514	9.42573	10.087	10.2947	10.3922		10.5452	10.6258	9.50495	10.2579	1.04025	0.367885
GTTGGAGAGGTATTAGAATTA	TRCN0000120165	Pet2	12.0164	12.0981	12.1595	12.123	#NUM!	13.6508	13.7051	13.5153	12.6924	12.4777	12.6175		12.0573	12.1413	13.6237	12.5959	-1.56646	-0.454595
GAGCCTTATGACTATAAGTTT	TRCN0000120415	Ccbl2	9.94524	9.72674	9.75158	9.73334	#NUM!	9.36931	9.62413	9.68628	10.5074	10.5054	10.8252		9.83599	9.74246	9.55991	10.6127	0.27608	-0.870203
GTGAAGTGGATGACGAAACAT	TRCN0000120416	Ccbl2	10.5259	10.3861	10.3249	10.3884	#NUM!	10.4248	10.4265	10.6174	10.3645	10.4104	10.488		10.456	10.3567	10.4896	10.421	-0.0335693	-0.06431
CCAGATTAAATCCTTAGCAAT	TRCN0000120777	Gabarapl2	12.4657	12.6442	12.6348	12.6052	#NUM!	12.2985	12.1931	12.4088	12.6825	12.6313	12.5495		12.555	12.62	12.3002	12.6211	0.254832	-0.00108929
GCCTAACTATGGGACAGCTTT	TRCN0000120781	Gabarapl2	10.6568	10.6192	10.5945	10.6582	#NUM!	10.6967	10.8524	10.7319	10.7634	11.0513	10.965		10.638	10.6263	10.7603	10.9266	-0.122346	-0.300223
GCTGTGAGTTACCATGTGGTT	TRCN0000121002	Mdp1	9.90367	9.84543	9.8193	9.86798	#NUM!	8.79747	8.93758	8.47244	8.52395	9.01914	9.45207		9.87455	9.84364	8.73583	8.99838	1.13872	0.845257
CTTTGAGAGGTTGCACCACAA	TRCN0000121006	Mdp1	11.3444	11.3004	11.2615	11.263	#NUM!	9.60132	9.91566	9.80298	10.1079	10.3742	10.16		11.3224	11.2623	9.77332	10.214	1.54909	1.04823
CCCAGAGTGAAGAGGGATAAA	TRCN0000123520	Gpatch1	10.6979	10.7935	10.8509	10.7671	#NUM!	10.8932	10.7937	11.0623	11.4608	11.2874	11.1973		10.7457	10.809	10.9164	11.3152	-0.170705	-0.506188
CCAGAGTGAAGAGGGATAAAT	TRCN0000123522	Gpatch1	12.0822	12.2285	12.2403	12.209	#NUM!	12.5832	12.492	12.7172	11.9038	11.9217	12.0244		12.1553	12.2246	12.5975	11.95	-0.442125	0.274686
CGCTATGACAACTACAAGAAA	TRCN0000123705	Sppl3	10.7757	10.7823	10.7456	10.7484	#NUM!	9.87296	10.021	9.82586	10.9119	11.011	10.6659		10.779	10.747	9.90661	10.8629	0.872368	-0.11593
TCCTCTACTTGGTGCCATTTA	TRCN0000123708	Sppl3	10.1052	10.1707	10.2441	10.1809	#NUM!	10.4709	11.1545	10.9981	10.1683	10.3901	10.2691		10.138	10.2125	10.8745	10.2758	-0.736518	-0.0633343
GCATTTGTAAAGGTGCAGTTA	TRCN0000124105	Rad52	12.3114	12.3058	12.2909	12.3298	#NUM!	12.1578	12.1169	12.1412	12.2028	12.1119	12.3213		12.3086	12.3104	12.1386	12.212	0.169959	0.0983778
GCAGAGACTCTGAACCTCATA	TRCN0000124106	Rad52	0	0	0	0	#NUM!	0	0	0	0	0	0		0	0	0	0	0	0
CTATTGAAGTTGGAACCAAAT	TRCN0000124139	Mcm6	10.7599	10.7458	10.8582	10.8057	#NUM!	7.22595	7.33841	7.44575	7.16421	7.72277	7.34966		10.7529	10.832	7.3367	7.41222	3.41617	3.41976
GCTGAGAGCATTAAGAACCAA	TRCN0000124142	Mcm6	11.7343	11.7571	11.6916	11.7047	#NUM!	9.74752	9.89555	9.85308	9.05442	9.19942	9.35557		11.7457	11.6982	9.83205	9.20314	1.91368	2.49503
CCTCACTAGAGAACAGATGTT	TRCN0000124876	Whsc2	10.377	10.4941	10.471	10.4616	#NUM!	9.44275	9.26355	9.50757	9.91323	9.88197	9.81224		10.4356	10.4663	9.40462	9.86915	1.03097	0.597144
CCTGTTCAGCAGCAACCTAAA	TRCN0000124877	Whsc2	7.3167	7.435	7.46976	7.42687	#NUM!	7.03499	7.26086	6.44686	7.31607	7.45084	7.74769		7.37585	7.44832	6.91423	7.50486	0.461616	-0.0565468
GCCAAGTACCAACACTATGGA	TRCN0000124988	Rai1	10.0604	10.044	10.0804	10.0576	#NUM!	9.04083	9.32745	9.20809	8.2114	8.67267	8.45246		10.0522	10.069	9.19212	8.44551	0.860055	1.62352
CCCATTGTAAAGCAACTTCAA	TRCN0000126574	Xpo1	10.4774	10.636	10.6051	10.5792	#NUM!	9.68248	9.99819	9.91913	9.65082	9.63606	9.51101		10.5567	10.5921	9.8666	9.5993	0.690086	0.992806
CCAGTTAACAACCAAATGTTT	TRCN0000126578	Xpo1	12.7967	12.9536	12.9525	12.9199	#NUM!	11.497	11.2162	11.3193	11.639	11.6125	11.6553		12.8752	12.9362	11.3442	11.6356	1.531	1.30061
GCTGGATTGGAAGAAGATGTA	TRCN0000126922	Fbxo32	11.2859	11.3139	11.3011	11.3143	#NUM!	10.3555	10.3799	10.6703	11.4222	11.169	11.1454		11.2999	11.3077	10.4686	11.2455	0.83133	0.062197
GTGCTTACAACTGAACATCAT	TRCN0000126923	Fbxo32	9.84543	9.73839	9.66787	9.69815	#NUM!	6.48593	6.4151	6.24645	8.21679	8.79866	7.89808		9.79191	9.68301	6.38249	8.30451	3.40942	1.37849
GCTGAGAATCATGCACATCAT	TRCN0000126962	Vps11	11.1375	11.1089	11.0911	11.0978	#NUM!	9.61596	9.65919	9.59702	10.3161	10.3132	10.0942		11.1232	11.0944	9.62406	10.2411	1.49917	0.853296
GCCAACTGTTGTGTCTTGTTT	TRCN0000126963	Vps11	10.8123	10.7891	10.7209	10.7669	#NUM!	10.5643	10.8549	10.9042	10.1124	10.266	10.3414		10.8007	10.7439	10.7744	10.2399	0.0262744	0.503974
CCACACACTACAGACAGATTT	TRCN0000127182	Spryd4	10.6792	10.7833	10.7721	10.7979	#NUM!	9.59837	9.43604	9.57204	9.63303	9.11421	9.32493		10.7313	10.785	9.53548	9.35739	1.19578	1.42763
GCGCTGATGATCTCGCTCATT	TRCN0000127390	Wrb	8.38816	7.89089	7.80396	7.8635	#NUM!	7.23595	7.39444	7.13474	8.38506	8.93103	9.16052		8.13953	7.83373	7.25504	8.82553	0.884483	-0.991804
GTTGCTTTCTACATACTACAA	TRCN0000127393	Wrb	10.8894	10.9153	10.9069	10.9078	#NUM!	9.35133	9.97081	9.71839	8.9602	8.92722	8.82819		10.9024	10.9074	9.68018	8.9052	1.22218	2.00218
CCAAACACTTAGGTCTCAGAT	TRCN0000173172	Zfp36l2	9.82315	9.86264	9.93125	9.91526	#NUM!	8.64757	8.28879	8.83978	9.4659	9.851	9.77274		9.8429	9.92326	8.59205	9.69655	1.25085	0.226712
GCATCAGAGATTACCTCACTT	TRCN0000173377	Tmem33	10.2732	10.3335	10.2845	10.3527	#NUM!	9.16263	9.18232	9.45094	9.45025	9.57948	9.3334		10.3034	10.3186	9.2653	9.45437	1.03806	0.86421
GAGCAATCAATGGACAGTCAT	TRCN0000173401	Klhl10	10.3493	10.0176	9.95635	10.0736	#NUM!	9.58738	8.98358	8.98043	9.09269	9.25404	9.68137		10.1834	10.015	9.1838	9.3427	0.999637	0.672257
GCTCTCAAGGAAGTGGTATTT	TRCN0000173610	Cry1	11.4428	11.4622	11.4992	11.4492	#NUM!	11.9075	11.8787	11.8775	12.5639	12.6573	12.5573		11.4525	11.4742	11.8879	12.5929	-0.435386	-1.11864
CAATCTGTGTCCTCTACTCTT	TRCN0000173643	Smug1	10.3039	10.4019	10.4216	10.4221	#NUM!	10.1724	10.2839	10.2606	10.1319	10.313	9.74761		10.3529	10.4218	10.239	10.0642	0.113943	0.357628
GCTTGGAGAGGAGGGAAATTT	TRCN0000173879	Setd6	11.0319	11.0037	11.0641	11.0167	#NUM!	10.3875	10.4729	10.4699	11.1453	11.1856	11.2205		11.0178	11.0404	10.4434	11.1838	0.574365	-0.143395
GCTGTTTGTTGGAGAACCTGT	TRCN0000173921	Adi1	9.49636	9.3919	9.39576	9.36169	#NUM!	10.1695	10.0509	10.1192	9.55322	9.70146	9.75217		9.44413	9.37872	10.1132	9.66895	-0.669073	-0.290227
GCAACTGGAGATTGACCAGAA	TRCN0000173938	Nudc	10.7528	10.7148	10.7151	10.6878	#NUM!	10.8699	11.6519	11.057	11.5767	11.534	11.5435		10.7338	10.7015	11.1929	11.5514	-0.459173	-0.84992
CGAAATCAATACCAAGAAGAT	TRCN0000174362	Nudc	11.3184	11.3431	11.3399	11.3906	#NUM!	7.83299	8.45178	8.28434	8.69224	8.87033	9.14354		11.3308	11.3653	8.1897	8.90204	3.14107	2.46322
GCATGTGGAGATTCACTTATT	TRCN0000174596	Lass5	10.1322	10.2391	10.1816	10.1839	#NUM!	10.0621	9.78438	10.3457	9.61598	9.59295	9.54511		10.1856	10.1828	10.064	9.58468	0.121598	0.598103
GCAAAGATACACTTCCCAATT	TRCN0000174668	Adi1	13.0922	13.1941	13.1482	13.1692	#NUM!	12.7696	12.9641	12.8995	12.6653	12.6672	12.6429		13.1432	13.1587	12.8777	12.6585	0.265409	0.500229
GCCAATGAACTTGTAAACCTA	TRCN0000174691	Cse1l	10.7196	10.7407	10.7313	10.7017	#NUM!	4.78494	4.82237	4.52279	5.9245	5.48613	5.12896		10.7301	10.7165	4.71004	5.5132	6.02008	5.20329
GCAGATCTTCATTCTACTATT	TRCN0000174952	Cse1l	11.0116	11.0843	11.05	11.0837	#NUM!	6.38092	6.69621	6.19522	7.20616	7.15505	7.44773		11.0479	11.0668	6.42411	7.26965	4.62383	3.7972
GCAATTCATGATGACCAATAA	TRCN0000175156	Tmem33	11.5414	11.6019	11.5311	11.5716	#NUM!	10.9499	10.5968	11.0491	11.4847	11.6629	11.5547		11.5716	11.5513	10.8653	11.5674	0.706361	-0.0160567
CTTCCAAAGGATCAACAGGAT	TRCN0000175444	Ift52	10.1914	10.2391	10.3332	10.2694	#NUM!	10.1177	10.3716	9.76745	10.225	10.044	10.0545		10.2153	10.3013	10.0856	10.1078	0.129702	0.193485
GCTTATGAACAACCTCTCTAA	TRCN0000175756	Smug1	11.5404	11.6236	11.6308	11.6276	#NUM!	10.1178	9.90364	10.2627	10.5696	10.2116	10.3458		11.582	11.6292	10.0947	10.3757	1.48726	1.25355
GCACCACAACTCAATATGAAA	TRCN0000175839	Zfp36l2	11.3293	11.386	11.3575	11.3465	#NUM!	9.52953	10.0804	9.91108	9.77059	9.68933	9.83832		11.3576	11.352	9.84034	9.76608	1.51727	1.58594
GCTCAAACAGTGTAAAGACAA	TRCN0000175889	Slmap	12.6138	12.6549	12.6137	12.6138	#NUM!	12.1821	12.1089	12.1829	12.2666	12.1717	12.2455		12.6343	12.6138	12.158	12.2279	0.476353	0.385833
GAAGAAAGTGTCTGTGACTAT	TRCN0000175950	Nob1	13.1507	13.0735	13.0504	13.1054	#NUM!	13.7261	13.8626	13.7991	13.44	13.4056	13.5678		13.1121	13.0779	13.7959	13.4711	-0.683828	-0.393255
GCAAGCAGACTGAATATTGAA	TRCN0000175971	Cry1	10.8412	10.903	10.875	10.8834	#NUM!	9.39912	9.57847	9.65569	10.3094	9.86521	9.62178		10.8721	10.8792	9.54443	9.93212	1.32767	0.947051
GCTGTTTGTGTCAGAACCTAT	TRCN0000175987	Ift52	11.4022	11.3787	11.3295	11.3792	#NUM!	11.8584	11.8966	11.7674	11.2371	11.2813	11.442		11.3904	11.3544	11.8408	11.3201	-0.450359	0.03423
CCCAACTTAGACTACTACAAA	TRCN0000176628	Tbc1d5	11.1452	11.3413	11.3127	11.2741	#NUM!	10.5568	10.3734	10.4474	10.7452	11.0487	10.8568		11.2433	11.2934	10.4592	10.8835	0.784074	0.409864
CCATGCCATTACTGTAACATT	TRCN0000176687	Ndrg3	10.9311	11.0848	11.0824	11.1058	#NUM!	9.22584	9.68622	9.69068	9.5202	9.73692	9.51912		11.008	11.0941	9.53425	9.59208	1.47371	1.50204
GAAGCAGAACAAATATCCCAT	TRCN0000176815	Gpcpd1	12.4486	12.2991	12.3274	12.3243	#NUM!	12.6831	12.6019	12.4289	12.5914	12.6054	12.5296		12.3738	12.3258	12.5713	12.5755	-0.197466	-0.249604
GAGAAGGAGAATTACCATTAT	TRCN0000176847	Nudt15	10.8114	10.874	10.9664	10.9147	#NUM!	9.24232	9.86861	9.28973	9.1448	8.9744	9.13511		10.8427	10.9406	9.46689	9.08477	1.37583	1.85581
GAACAACTGAAGGAAACCAAA	TRCN0000177033	Ccdc82	13.5269	13.4469	13.4728	13.4755	#NUM!	14.3817	14.4097	14.4438	13.9097	13.918	13.9817		13.4869	13.4741	14.4117	13.9365	-0.924791	-0.462325
GCTAGTTTCAATCCTTTGTAA	TRCN0000177038	Fam96a	11.1758	11.2734	11.2304	11.2567	#NUM!	10.538	10.8683	10.976	10.7579	10.4649	10.6173		11.2246	11.2436	10.7941	10.6134	0.430546	0.630199
GAGAGAACATTGAACAAAGTA	TRCN0000177481	Ssx2ip	10.3059	10.2661	10.2502	10.3017	#NUM!	8.50798	8.45442	8.68408	9.39965	9.40992	9.38763		10.286	10.276	8.54883	9.39907	1.73718	0.876905
CACAAGTTGGAAATCTACATT	TRCN0000177506	Fam96a	12.6025	12.7052	12.6987	12.6854	#NUM!	12.1365	12.1255	12.057	12.1608	12.093	12.1031		12.6538	12.692	12.1063	12.119	0.547533	0.573056
CCATATCTCTGTCTACATCCA	TRCN0000177773	Mzt2	10.5578	10.7205	10.7552	10.7225	#NUM!	7.82322	8.24505	7.81195	8.72265	9.43371	8.96944		10.6391	10.7389	7.96007	9.04193	2.67906	1.69692
CGTATGAAGAGCTCCATTTAA	TRCN0000177930	Ccz1	9.87558	9.88641	9.95837	9.94735	#NUM!	10.2044	10.0179	10.0411	9.71433	9.81013	10.0725		9.88099	9.95286	10.0878	9.86565	-0.206799	0.0872087
GAAAGCCTAAGTGTAGTCAAA	TRCN0000177959	Ccz1	11.1279	10.846	10.8452	10.9394	#NUM!	10.9417	11.2957	11.0964	11.8009	11.5576	11.6759		10.9869	10.8923	11.1113	11.6781	-0.124345	-0.785851
GCGTGAACTGAACTCCAATAA	TRCN0000177960	Tnrc18	9.77848	9.73756	9.67808	9.71647	#NUM!	8.69404	8.03925	8.32793	8.32187	8.38457	8.28613		9.75802	9.69727	8.35374	8.33086	1.40428	1.36642
GAACCTGCTATTTGCTGCATA	TRCN0000177991	Gls2	10.3189	10.0669	10.0844	10.1358	#NUM!	12.0552	11.9677	11.801	11.4483	11.5052	11.5978		10.1929	10.1101	11.9413	11.5171	-1.74838	-1.40702
GAGCAAGGTTATGACCCATTT	TRCN0000178335	Nudt15	11.0729	10.7643	10.6933	10.8579	#NUM!	11.5622	11.7091	11.51	11.6714	11.8615	11.934		10.9186	10.7756	11.5938	11.8223	-0.675185	-1.04674
GCTACTGTCTTCAGTTGCTTT	TRCN0000178426	Slx1b	9.88491	9.87099	9.91884	9.87689	#NUM!	9.95025	9.40918	9.84971	9.15967	9.23357	9.0967		9.87795	9.89787	9.73638	9.16331	0.141564	0.734554
GAATTGCCAGAGAAGGAATAA	TRCN0000178479	Fam36a	9.98916	9.9131	9.96586	9.95017	#NUM!	8.85135	9.33943	8.84232	8.27175	8.18153	8.06499		9.95113	9.95802	9.01103	8.17276	0.940098	1.78526
CCTCCAGATTCTGAACATCAA	TRCN0000178660	Fxn	11.4278	11.51	11.5795	11.5015	#NUM!	9.10876	9.121	9.22637	9.98866	10.0878	10.1494		11.4689	11.5405	9.15205	10.0753	2.31686	1.46522
CGTTTACGTTGGATTCACTGT	TRCN0000178669	Slx1b	11.648	11.6356	11.6371	11.6749	#NUM!	9.93365	10.1459	9.99935	10.5083	10.7924	10.71		11.6418	11.656	10.0263	10.6702	1.6155	0.985769
CGAACTCAATCTCAACCAGAA	TRCN0000179028	Lrrc57	10.513	10.4016	10.3531	10.4091	#NUM!	8.77633	8.99178	8.89416	9.72099	9.93153	10.2906		10.4573	10.3811	8.88742	9.98105	1.56989	0.400035
GTTAGCAATACTCCTCGTCAT	TRCN0000179166	Fam20b	10.0914	10.1229	10.1189	10.1281	#NUM!	9.97875	10.0633	10.3396	10.1989	10.1129	10.1498		10.1072	10.1235	10.1272	10.1539	-0.0200478	-0.0303712
GCTTTGAACTTCCTAGTCTTT	TRCN0000179601	Athl1	10.0165	10.0537	9.95779	9.99248	#NUM!	9.1407	9.2767	9.09502	9.94022	9.90325	9.74696		10.0351	9.97514	9.17081	9.86348	0.864268	0.11166
CATTGATGACCTGGATTCCAA	TRCN0000180138	Ydjc	11.5861	11.6493	11.6948	11.6512	#NUM!	9.99035	9.57882	9.75371	9.95305	10.3436	10.1488		11.6177	11.673	9.77429	10.1485	1.84336	1.52452
CAGATGCGTTCTCTTGTTCTT	TRCN0000181035	Ydjc	11.6397	11.5582	11.5404	11.5831	#NUM!	10.5348	10.5142	10.2156	11.7308	11.6004	11.6686		11.599	11.5618	10.4215	11.6666	1.17742	-0.104795
CGAGACTGTTACTTGCTGGAA	TRCN0000181325	Ssx2ip	12.219	12.0188	12.019	12.1168	#NUM!	13.2025	13.1784	13.2214	11.7293	11.6734	11.7481		12.1189	12.0679	13.2008	11.7169	-1.08187	0.351012
CCAGTTGGTTACCCTTTGTGT	TRCN0000181396	Rwdd3	10.6864	10.6974	10.715	10.75	#NUM!	9.05759	9.19747	9.40658	9.95522	10.0864	10.2113		10.6919	10.7325	9.22055	10.0843	1.47137	0.648207
GCACCATGAAACCTGAACCTA	TRCN0000181586	Tnrc18	9.34951	9.19933	9.26596	9.25859	#NUM!	9.74272	9.792	9.62477	9.91955	9.95642	10.0811		9.27442	9.26227	9.71983	9.9857	-0.445412	-0.723421
GCAGTTGTTCACCAACCATAT	TRCN0000181946	Ildr1	10.3015	10.2552	10.2023	10.2532	#NUM!	7.68057	8.74613	7.9438	8.72537	8.29598	8.25621		10.2784	10.2277	8.1235	8.42585	2.15485	1.80187
GTCGAAGTTTCTCCACGAGAA	TRCN0000182287	Fads6	12.3599	12.0903	12.0165	12.092	#NUM!	11.8837	11.9127	11.7853	11.5953	11.7141	11.6514		12.2251	12.0543	11.8606	11.6536	0.364534	0.400683
GCCCATATCTCTGTCTACATC	TRCN0000182403	Mzt2	9.85762	9.88865	9.82534	9.84469	#NUM!	9.59989	9.91066	9.52763	9.59069	9.75716	9.83061		9.87314	9.83501	9.67939	9.72615	0.193744	0.108859
CATCGATTTATCCAACAACAA	TRCN0000183417	Lrrc57	10.4075	10.4444	10.438	10.448	#NUM!	8.29806	8.6299	8.43512	8.64439	8.762	8.66651		10.426	10.443	8.45436	8.69097	1.97161	1.75202
GATTAGACAGTGTCTGAAATA	TRCN0000183541	Mrps27	10.866	10.9416	10.988	10.9309	#NUM!	9.12523	9.15222	8.96871	8.82605	8.64048	8.92713		10.9038	10.9594	9.08205	8.79789	1.82179	2.16152
GCTTTACTGATTCTTGAAGGA	TRCN0000183707	Fam20b	9.79868	9.83422	9.84015	9.81832	#NUM!	8.74759	8.34106	8.66458	9.54205	9.69665	9.89642		9.81645	9.82923	8.58441	9.71171	1.23204	0.11753
CCATCGCTCAGAACTTTGTGT	TRCN0000183938	Mrpl14	10.4085	10.45	10.4543	10.4274	#NUM!	9.38502	10.0159	9.48451	9.85714	9.98079	9.93166		10.4293	10.4408	9.62848	9.9232	0.800786	0.517631
GTTTGACTCCAACAACGTGGT	TRCN0000184351	Mrpl14	10.6159	10.3658	10.3481	10.4162	#NUM!	10.6227	10.5207	10.408	10.2147	10.4916	10.316		10.4909	10.3821	10.5171	10.3408	-0.0262472	0.041367
GTAACAGTCTAGATGTTGATA	TRCN0000185684	Olfr1156	13.7133	13.7942	13.8202	13.8082	#NUM!	13.7718	13.8781	13.7956	13.8401	13.7622	13.7398		13.7538	13.8142	13.8152	13.7807	-0.0613836	0.0334885
GCTATCTTCTTTGGTTCCCTT	TRCN0000187524	Olfr972	12.5212	12.5931	12.5811	12.5931	#NUM!	13.3511	13.3838	13.3276	13.5742	13.6726	13.5491		12.5571	12.5871	13.3542	13.5986	-0.797044	-1.01153
CCACAGACTTCCCAAGAAAGA	TRCN0000189578	Thap7	10.0529	10.1513	10.1856	10.1791	#NUM!	7.35562	8.14056	7.11712	7.65312	7.94199	7.79596		10.1021	10.1824	7.53777	7.79703	2.56431	2.38533
CCCTCACAAACTGCACATTGT	TRCN0000189579	Mrpl30	8.40528	8.41439	8.36472	8.42079	#NUM!	6.84752	6.96454	7.1662	7.54768	7.15024	6.96475		8.40983	8.39275	6.99275	7.22089	1.41708	1.17186
GAGAAGCTGAAGGCGGAAATA	TRCN0000189843	Rabep1	10.6621	10.2125	10.1083	10.2741	#NUM!	9.63078	9.04664	9.35162	9.43782	9.47794	9.67404		10.4373	10.1912	9.34301	9.52993	1.09427	0.661284
GCCTACTTTGCACCTCGTTTA	TRCN0000189921	Mrpl21	10.7585	10.6036	10.561	10.6013	#NUM!	10.4479	10.4525	10.2212	10.8665	10.7314	11.0249		10.681	10.5812	10.3739	10.8743	0.307164	-0.293124
GCTTAGTGAGTGAGACGGAAT	TRCN0000190015	Rabep1	10.1808	10.1906	10.1562	10.1854	#NUM!	7.01088	7.27201	7.39739	8.19936	8.2373	8.25305		10.1857	10.1708	7.22676	8.22991	2.95892	1.94089
GATGCAGAGAGCCATAAGAAA	TRCN0000190737	2310033P09Rik	10.0482	10.049	10.0884	10.0202	#NUM!	9.44435	10.1006	9.87256	9.86687	9.81848	9.98646		10.0486	10.0543	9.80585	9.89061	0.242767	0.163699
GACAAACTCAGGGCAGCATTA	TRCN0000190869	Mrps26	10.8772	10.6293	10.5733	10.6717	#NUM!	11.6144	11.5741	11.5343	11.2392	11.2932	11.4434		10.7532	10.6225	11.5743	11.3253	-0.821025	-0.702739
CCTGGATACATTTGAGATATT	TRCN0000191136	Gsdmc	13.9396	14.1288	14.1683	14.132	#NUM!	13.9476	13.916	13.8567	14.3559	14.4167	14.1571		14.0342	14.1502	13.9068	14.3099	0.127398	-0.159721
CCAAGGATGATGACTTTGAAT	TRCN0000191157	2810021B07Rik	11.4471	11.5966	11.6033	11.5784	#NUM!	10.6402	10.6218	10.7914	10.6418	10.6581	10.7526		11.5219	11.5908	10.6845	10.6841	0.837375	0.906699
CCCAGGTTTCTATGATATGAT	TRCN0000191166	Slain2	11.5386	11.6324	11.6838	11.6006	#NUM!	11.4105	10.9169	11.2474	11.67	11.4777	11.489		11.5855	11.6422	11.1916	11.5456	0.39393	0.0965953
CCACATAAGCAAGTTACAGAA	TRCN0000191231	Oxnad1	12.8837	13.0581	13.0231	13.0112	#NUM!	12.5523	12.5225	12.4492	12.3486	12.4189	12.3915		12.9709	13.0172	12.508	12.3863	0.462859	0.630813
GATGGCTATAACTGAGTATAT	TRCN0000191846	Mrpl10	10.2758	10.376	10.3853	10.358	#NUM!	9.09641	8.644	8.75701	9.49053	9.50521	9.44368		10.3259	10.3716	8.83247	9.4798	1.49345	0.89182
GAGAAGTACAAGCCGATCATA	TRCN0000192151	1810026J23Rik	10.5573	10.3308	10.2787	10.3704	#NUM!	9.48155	9.38123	9.4309	9.93394	10.2214	10.2041		10.444	10.3246	9.43123	10.1198	1.0128	0.204724
CGACTACTTCGCAAACAGAAT	TRCN0000192395	Mrpl54	10.1468	10.1362	10.0772	10.1722	#NUM!	9.54587	9.53016	9.40391	9.59685	9.72854	9.75241		10.1415	10.1247	9.49331	9.6926	0.648191	0.432127
GCTGAAAGTGGTTAAACACTT	TRCN0000192587	Mrpl30	12.4969	12.5441	12.4903	12.5129	#NUM!	10.657	10.8947	10.7888	10.199	10.2438	10.1		12.5205	12.5016	10.7802	10.181	1.74035	2.32063
GAAAGAGAAGATGGCCTTTGA	TRCN0000192589	Spata24	10.4204	10.2884	10.2767	10.3614	#NUM!	9.77841	9.53034	9.7437	9.44666	9.74742	9.62597		10.3544	10.319	9.68415	9.60668	0.670243	0.712352
GCGGAAACACAAGATCTTCAT	TRCN0000192693	Mrpl10	9.81127	9.73174	9.68088	9.74637	#NUM!	9.01392	8.86889	8.77176	9.16587	9.41222	9.24954		9.77151	9.71363	8.88485	9.27588	0.886654	0.43775
GAAAGAGCAAGAAGTGCTCAA	TRCN0000192903	Mrps26	8.73883	8.57343	8.50894	8.57482	#NUM!	7.50726	7.19251	6.99142	6.99171	7.22397	7.43503		8.65613	8.54188	7.2304	7.2169	1.42574	1.32498
GCTACATTAACACAAGCTGAA	TRCN0000192992	8430406I07Rik	10.5975	10.6757	10.6618	10.6694	#NUM!	9.91976	9.83067	9.93072	9.93869	10.1241	10.1946		10.6366	10.6656	9.89372	10.0858	0.742901	0.579802
GCTATGAGATAGGGACAGTAA	TRCN0000192996	Oxnad1	10.5651	10.6633	10.6941	10.7005	#NUM!	9.13374	9.28837	8.67935	10.5629	10.6635	10.7048		10.6142	10.6973	9.03382	10.6437	1.58037	0.0535485
GTATGAGATGGTGAAGAAGAT	TRCN0000192997	Lemd2	10.327	10.4089	10.3883	10.3751	#NUM!	10.4207	10.7092	10.5333	11.1514	11.0943	11.1478		10.368	10.3817	10.5544	11.1312	-0.186446	-0.749484
GCAGACATACTAAACCACATA	TRCN0000193449	Setd6	10.0029	10.096	10.164	10.1448	#NUM!	8.56978	8.94444	8.33015	9.44343	9.20523	9.44219		10.0495	10.1544	8.61479	9.36362	1.43467	0.790758
GACTGGATTCAATTCTTTCTT	TRCN0000193464	Gfral	12.0361	11.9397	11.9703	11.9456	#NUM!	12.5215	12.5566	12.6209	12.4208	12.3199	12.3779		11.9879	11.9579	12.5663	12.3729	-0.578458	-0.414926
CTATGAGAGCTACAAGAAGAA	TRCN0000193919	1810055G02Rik	10.7408	10.8924	10.8812	10.8641	#NUM!	10.9381	10.8251	11.0757	10.4637	10.5428	10.5976		10.8166	10.8727	10.9463	10.5347	-0.129724	0.337947
GACTTGTAAAGCCACTGGCAA	TRCN0000194648	Lass5	9.2191	8.92335	8.83889	9.02526	#NUM!	10.0646	9.5273	10.0155	10.3429	10.2373	10.2576		9.07123	8.93208	9.86915	10.2792	-0.797921	-1.34717
CCAGTTTCTCTCCCTCTATGT	TRCN0000195971	Mrps27	10.2913	10.328	10.3316	10.3334	#NUM!	9.80967	9.59505	9.65706	9.29814	9.78256	9.81867		10.3097	10.3325	9.68726	9.63312	0.622397	0.699383
CAAACTGGACTTGTCTTCATT	TRCN0000197534	Fxn	10.1475	10.1787	10.1675	10.1622	#NUM!	7.7294	7.93596	7.83709	9.13371	9.23	8.82424		10.1631	10.1648	7.83415	9.06265	2.32895	1.10219
GAACATAGACTGTGAAGTATT	TRCN0000197955	Podxl2	12.5725	12.642	12.6246	12.6588	#NUM!	12.943	13.0086	13.1192	13.1484	13.1377	13.1412		12.6073	12.6417	13.0236	13.1424	-0.41637	-0.500713
CCATCAGTTCATCTCCAAGTA	TRCN0000197996	Tbc1d5	10.0513	10.1466	10.1841	10.1318	#NUM!	8.64382	8.68164	8.42158	9.33231	8.81046	9.68623		10.099	10.158	8.58235	9.27633	1.51661	0.881628
CAACATCAAGGAGTACCTGAT	TRCN0000198092	Rwdd3	10.1482	10.2182	10.2269	10.2365	#NUM!	9.99491	9.81909	9.99307	10.2016	10.371	10.2298		10.1832	10.2317	9.93569	10.2675	0.247519	-0.0357383
CATCATGCCAACAAGCAACTT	TRCN0000198217	Gls2	10.2935	10.3437	10.3252	10.3412	#NUM!	9.28598	9.49398	9.65127	9.12172	8.85818	9.07103		10.3186	10.3332	9.47707	9.01697	0.841489	1.31619
GACTGGACTTGGACATTTCTT	TRCN0000198552	Fam36a	10.504	10.3148	10.3339	10.3564	#NUM!	10.3644	10.3019	10.4504	10.5159	10.7728	10.7871		10.4094	10.3451	10.3722	10.6919	0.0371143	-0.346791
CCATTATACACTCACCGTCAA	TRCN0000198738	Fads6	11.1576	11.2817	11.2328	11.2258	#NUM!	9.47835	9.74243	10.0281	10.7305	10.7949	10.86		11.2197	11.2293	9.74963	10.7951	1.47005	0.43418
GAGAAGCTTGCAAGACGAGTT	TRCN0000198964	Mrpl52	8.82497	8.25313	8.24101	8.40033	#NUM!	8.22245	8.20689	8.01289	7.63511	7.7914	7.73641		8.53905	8.32067	8.14741	7.72097	0.391639	0.599693
GAAGCTTGCAAGACGAGTTGT	TRCN0000198965	Mrpl52	9.47605	9.06694	9.00526	9.12029	#NUM!	10.4208	10.2793	10.5479	9.2642	9.57064	9.43901		9.2715	9.06277	10.416	9.42462	-1.14451	-0.361844
CCACAGCATCTCTCTCTAGTA	TRCN0000200080	Ndrg3	10.4142	10.5481	10.5656	10.5527	#NUM!	9.84802	9.45958	9.60577	9.89632	9.87596	9.71154		10.4811	10.5592	9.63779	9.82794	0.843348	0.731229
CGCACAGTTACAGAGCTCATT	TRCN0000200175	Rc3h1	10.4212	10.2952	10.2618	10.2948	#NUM!	9.13048	9.15245	9.16868	8.91406	8.80828	9.09695		10.3582	10.2783	9.15054	8.93976	1.20765	1.33851
GATTTAGACACCAAGAGTAAA	TRCN0000200691	Mtif3	10.2566	10.3607	10.3381	10.3819	#NUM!	8.60945	8.6903	9.03677	9.0124	8.86762	8.77832		10.3087	10.36	8.77884	8.88611	1.52985	1.4739
GTCTAATGAGTTGGAAAGTTA	TRCN0000200745	2810021B07Rik	10.8219	10.8806	10.913	10.9113	#NUM!	9.38375	9.42887	9.55733	9.70038	10.0351	9.70511		10.8513	10.9122	9.45665	9.81351	1.39462	1.09865
GAGGACACAGAATTACCATTT	TRCN0000200887	Mia2	10.3057	10.1044	10.1752	10.1944	#NUM!	7.87449	8.17685	8.36337	8.43015	8.95721	9.01374		10.205	10.1848	8.13824	8.80036	2.0668	1.38441
CTCTATCCGGGAATATGCTAA	TRCN0000200953	Mrpl54	9.63966	9.72757	9.73212	9.67704	#NUM!	10.4553	9.79051	9.6191	9.27053	9.23714	9.4939		9.68362	9.70458	9.95496	9.33386	-0.271341	0.370722
CAGAAGAGAATGGGAGAATTT	TRCN0000200989	Ccdc99	10.4814	10.5305	10.5732	10.5814	#NUM!	8.44116	8.60382	8.38291	9.1346	9.41766	9.29658		10.506	10.5773	8.47596	9.28295	2.03001	1.29435
GCCATGATAGAACAGAAGAAT	TRCN0000201236	Ccdc99	10.6355	10.7875	10.7156	10.7713	#NUM!	9.47238	9.44696	9.49371	9.99735	9.87741	9.82568		10.7115	10.7435	9.47102	9.90015	1.2405	0.843317
GCAGAGGACCTGATTCTAATT	TRCN0000201705	Mrpl21	9.95745	10.1022	10.0175	10.0498	#NUM!	8.82624	8.97731	9.20732	8.40424	8.97168	8.74093		10.0298	10.0336	9.00362	8.70561	1.02618	1.32803
GCAGCTGGAGAAAGAGAAGAT	TRCN0000201737	Spata24	9.93264	9.84041	9.78649	9.79969	#NUM!	10.1899	10.3924	10.4229	9.46668	9.77366	9.7611		9.88653	9.79309	10.3351	9.66714	-0.448565	0.125948
GCTGTTCGAGGAGAAGTACAA	TRCN0000201867	1810026J23Rik	10.2003	10.1249	10.0984	10.0982	#NUM!	10.2918	10.2055	10.1642	9.89158	9.94705	9.84905		10.1626	10.0983	10.2205	9.89589	-0.0578948	0.202402
CCGAACACTGAGCTCCATAAA	TRCN0000201897	Rabgap1	10.4077	10.4185	10.4155	10.3889	#NUM!	8.30551	8.28308	8.12015	8.80092	9.41623	9.07972		10.4131	10.4022	8.23625	9.09895	2.17688	1.30325
CGCACTTGGTTACAAGAACGT	TRCN0000201947	2310033P09Rik	10.3423	10.0493	10.042	10.1782	#NUM!	10.768	10.6397	10.7437	10.1511	10.293	10.3688		10.1958	10.1101	10.7171	10.271	-0.521313	-0.160883
CGCTAGGGTTTGGGTATCTAT	TRCN0000202040	8430406I07Rik	9.26404	9.12517	9.1197	9.14141	#NUM!	8.67962	8.54562	9.10423	8.07794	7.83612	8.39441		9.19461	9.13055	8.77649	8.10283	0.418119	1.02773
GCTGCACGAACTGTACAACTT	TRCN0000202490	Lemd2	9.96076	9.84041	9.81229	9.86984	#NUM!	7.61513	7.32364	7.49577	7.21663	7.57999	7.78819		9.90059	9.84107	7.47818	7.52827	2.42241	2.3128
GCCGGGTGAAATGCTATAAAT	TRCN0000220443	Ptprk	10.0053	9.92881	9.90392	9.87058	#NUM!	5.48593	5.52102	5.286	6.08349	5.9935	6.09203		9.96705	9.88725	5.43098	6.05634	4.53607	3.83091
GCCCAGACTAAGAACATAAAT	TRCN0000220444	Ptprk	10.3512	10.3513	10.352	10.3182	#NUM!	9.36565	8.76523	9.05624	9.26094	9.43286	9.47764		10.3512	10.3351	9.06238	9.39048	1.28886	0.944615
TGAAGACTCCAGCTCTCATTG	TRCN0000305329	Abhd14b	6.52051	5.89833	6.29049	6.20178	#NUM!	2.36753	0.872839	2.82657	2.86478	2.93562	3.53212		6.20942	6.24613	2.02231	3.11084	4.18711	3.13529
TGCTGCATGGTATCCGCTTCT	TRCN0000305330	Abhd14b	9.14726	8.46838	8.66362	8.69227	#NUM!	5.99817	5.49782	5.67887	6.10036	6.50884	6.42303		8.80782	8.67794	5.72495	6.34408	3.08287	2.33387
GACCTGCTGCAGAACCTTATA	TRCN0000305648	Asap1	7.82315	7.12073	7.44028	7.28897	#NUM!	4.79438	3.9216	4.52842	4.52992	4.39157	6.78068		7.47194	7.36462	4.4148	5.23405	3.05714	2.13057
CAGACCTGCCTTACGACTATG	TRCN0000305732	Sod2	7.67908	6.97352	7.2132	7.21824	#NUM!	4.01846	3.05076	3.82657	3.74299	4.57077	3.75281		7.3263	7.21572	3.63193	4.02219	3.69437	3.19353
GCTTACTACCTTCAGTATAAA	TRCN0000311411	Sod2	11.339	11.0681	11.2391	11.1829	#NUM!	7.63793	7.66758	7.63881	8.18138	8.34996	9.23119		11.2036	11.211	7.64811	8.58751	3.55546	2.62349
ACCATCTCGTGCTCCTATAAA	TRCN0000328334	Rai1	7.5235	7.08466	7.29598	7.08354	#NUM!	3.72447	4.34857	3.67761	3.33045	4.54171	6.11709		7.30408	7.18976	3.91688	4.66308	3.38719	2.52668
CTTTGAACTTCCTAGTCTTTG	TRCN0000328754	Athl1	8.72396	8.18297	8.41272	8.45988	#NUM!	5.19285	5.02867	5.31721	5.12064	5.63114	5.84448		8.45347	8.4363	5.17958	5.53209	3.27389	2.90421
AGAAAGAAGTTCTCGTTTATG	TRCN0000341671	Fam102b	9.26628	8.64595	8.8955	8.88575	#NUM!	7.0275	6.95765	6.09265	7.48927	8.02796	7.3744		8.95611	8.89063	6.6926	7.63054	2.26351	1.26008
GCTGGGCTTTGCAGATCTAAA	TRCN0000341672	Fam102b	9.30372	8.54527	8.72195	8.80632	#NUM!	5.77782	5.58983	6.20579	5.62018	5.24215	5.34627		8.92449	8.76413	5.85781	5.40287	3.06668	3.36127
GCTACCATACGAGCAATTATA	TRCN0000341884	Ythdc2	10.4077	10.0775	10.2891	10.1592	#NUM!	7.5923	7.25827	7.09217	8.39475	8.38223	8.06499		10.2426	10.2241	7.31425	8.28066	2.92834	1.94349
ACCTAGTACCAGCCAATATAA	TRCN0000346185	Cep350	11.9845	11.607	11.9804	11.8391	#NUM!	8.78568	8.65895	8.20227	8.49844	8.07798	8.47454		11.7957	11.9097	8.54897	8.35032	3.24676	3.55941
GAACAGTACCAACCCTATAAT	TRCN0000346186	Cep350	11.0018	10.5688	10.8294	10.7703	#NUM!	7.69577	7.29069	7.74226	9.18499	8.39593	8.5039		10.7853	10.7999	7.57624	8.69494	3.20905	2.10493
GCTGACATACTTAGGATTAAG	TRCN0000346746	Slc39a9	9.96929	9.52619	9.76056	9.7115	#NUM!	4.61945	5.01034	5.04439	6.28111	6.54694	6.12303		9.74774	9.73603	4.89139	6.31703	4.85634	3.419
AGGCTGTGTCTTCCGATATAG	TRCN0000346780	Katnb1	9.55927	8.55189	8.64364	8.73865	#NUM!	8.02173	8.11244	8.60876	6.85401	7.31205	7.82697		9.05558	8.69115	8.24764	7.33101	0.807937	1.36014
ACACGATCTCTGTATCCAAAT	TRCN0000348086	Arl4c	11.0459	10.5873	10.8249	10.7603	#NUM!	6.86163	6.7567	6.68455	7.97788	7.24602	7.92501		10.8166	10.7926	6.76763	7.7163	4.04897	3.07627
GCTAGTCAGGCTCTTCGATAT	TRCN0000350676	Ick	9.83614	9.27673	9.46326	9.44647	#NUM!	8.42053	6.63837	7.28973	6.82914	7.10838	6.86059		9.55643	9.45487	7.44955	6.9327	2.10689	2.52216
TAATCATGCCAATATCGTAAA	TRCN0000353179	Ick	10.1147	9.84273	10.1343	10.0088	#NUM!	7.75713	7.22378	7.63099	8.22267	8.14818	8.07397		9.9787	10.0716	7.5373	8.14827	2.4414	1.9233
CCCTTTGCTGTGACCTATTAA	TRCN0000360327	Atm	10.3585	9.86264	10.1241	10.0108	#NUM!	6.52262	6.33718	6.19433	7.53019	7.62423	7.53659		10.1106	10.0675	6.35138	7.56367	3.75921	2.50379
CGCTTAGCTGGAGGCTTAAAT	TRCN0000360328	Atm	10.2935	9.53481	9.8517	9.83099	#NUM!	8.20153	8.93245	8.05928	8.02878	8.41523	8.49246		9.91414	9.84135	8.39776	8.31215	1.51638	1.52919
AGACACTACTGGGAGGTAACA	TRCN0000367021	Spryd4	8.89821	8.33327	8.54477	8.55922	#NUM!	5.67163	5.66074	5.81281	7.9749	7.37165	7.419		8.61574	8.552	5.71506	7.58852	2.90068	0.963478
GTGTATTTGAAGTCTCGAATA	TRCN0000374164	Tead1	10.2562	9.74707	10.0258	9.96488	#NUM!	6.06407	6.00315	5.86264	6.20717	6.67959	6.85703		10.0016	9.99534	5.97662	6.58127	4.02501	3.41407
ACCACGATGCCTCAACCTTTA	TRCN0000374481	Plod2	8.56979	8.00419	8.2914	8.12029	#NUM!	4.82696	4.36469	4.41458	6.05517	5.36337	5.33265		8.28699	8.20585	4.53541	5.58373	3.75158	2.62212
GCTGAAGACCTACCCTTTAAA	TRCN0000376981	Crkl	9.03178	8.43909	8.73953	8.62595	#NUM!	6.99305	6.65616	6.29593	5.71373	5.8968	6.80432		8.73544	8.68274	6.64838	6.13829	2.08705	2.54446
CCAAAGCGATGATTCGAATTT	TRCN0000380301	Arl4c	13.758	13.2797	13.4613	13.4126	#NUM!	10.292	10.0294	10.3785	10.6996	10.809	10.9225		13.5188	13.4369	10.2333	10.8104	3.28551	2.62658
