# Supplementary material for: Altered Mitochondria Functionality Defines a Metastatic Cell State in Lung Cancer and Creates an Exploitable Vulnerability
Source: Oxford University Press journal article supplement (doi:10.1158/0008-5472.can-20-1865), 2020-11-25
Supplement: 00085472can201865-sup-244539_2_supp_6715425_qjmwr9.xlsx [file 00085472can201865-sup-244539_2_supp_6715425_qjmwr9.xlsx]

## Sheet: Data Table 9
Supplementary Data Table S9
	These tables show the change in shRNA abundance upon in vitro (left tabel) or in vivo (right table) proliferation of the candidate shRNAs screened in this study. Each value represents the reads for that shRNA/total reads from that sample per million (log2). The shRNAs are ranked according to their effect in the respective screen on Met cells. The ranks correspond to the order of genes depicted in…
	Figure 3A gene table							Figure 3B and S3A gene table
	in vitro secondary screen							in vivo secondary screen
shRNA	368T1 Non-meta	394T4 Non-meta	238N1 metastasis	482N1 metastasis	404M1 metastasis	2691M1 metastasis		shRNA	238N1 metastasis	482N1 metastasis
Rps3_1	9.74406	8.25643	11.6055	9.55854	11.2876	8.65725		Snrpd3_2	6.00278	7.03019
Rps4x_2	8.86126	9.62212	9.5258	10.8939	8.81808	10.8449		Rps3_1	5.49423	6.96713
Snrpd3_2	10.4741	6.42037	9.46119	9.95001	11.1377	10.016		Rps4x_2	5.6252	6.57936
Eif4g1_1	7.18037	8.48131	10.4924	8.82863	7.55816	10.28		Rps3_2	5.34313	6.75021
Cse1l_1	7.74649	8.44151	9.98336	8.93836	6.87615	7.61138		Cse1l_1	6.02008	5.20329
Rps4x_1	7.25332	7.33208	10.2043	8.04076	5.91203	8.20507		Rps4x_1	4.99847	5.80962
Snrpe_1	7.95365	6.62162	7.49222	10.1544	3.99191	7.85141		Snrpe_1	4.12017	5.40563
Mtor_2	5.76575	6.87913	8.5307	8.25325	6.49391	9.72615		Eif3c_2	4.27335	4.53218
Mcm6_1	6.20512	5.92388	9.21363	7.13809	5.65763	9.11969		Cse1l_2	4.62383	3.7972
Cse1l_2	5.84922	7.16169	9.36681	6.46534	2.07903	7.38196		Ptprk_1	4.53607	3.83091
Rps3_2	7.58156	9.00602	7.57495	7.81491	6.75278	7.56582		Slc39a9_1	4.85634	3.419
Eif3c_1	5.48799	6.81508	7.05196	7.8153	5.66164	7.7925		Eif3c_1	4.03219	4.19728
Nsf_2	5.22436	4.74378	8.59426	6.08192	5.67107	5.35104		Eif4g1_1	3.98789	4.13412
Mtor_1	3.28764	3.85006	6.96271	7.42511	5.36404	6.58431		Mtor_2	3.75114	4.32928
Eif3c_2	6.35639	6.39088	7.54903	6.10375	5.77385	8.51978		Nsf_1	4.57649	2.98123
Snrpe_2	5.23375	4.18987	3.681	9.45203	2.54573	4.40957		Tead1_2	4.02501	3.41407
Tead1_1	1.1447	0.573803	7.01824	6.06271	6.93641	6.25021		Abhd14b_1	4.18711	3.13529
Snrpd3_1	5.15556	5.25611	7.76687	5.16306	7.41351	5.58842		Snrpd3_1	2.98048	4.27858
Abhd14b_2	3.86857	4.37417	6.8694	5.59972	4.47837	4.32541		Arl4c_1	4.04897	3.07627
Plod2_2	2.71566	3.31705	7.13431	5.16593	3.76943	4.93364		Sod2_1	3.69437	3.19353
Sp1_2	2.45234	2.71868	6.43121	5.74706	6.51107	5.60576		Snrpe_2	3.15489	3.70659
Rai1_2	4.38477	4.08092	6.2969	5.84886	3.54064	6.54091		Mcm6_1	3.41617	3.41976
Slc39a9_1	1.85807	2.44488	8.40564	3.65721	3.80556	4.65189		Cep350_1	3.24676	3.55941
Eif4g1_2	4.54118	4.57309	5.83262	6.1327	6.37897	5.58745		Nsf_2	4.23571	2.56314
Tead1_2	2.59424	3.58688	6.19812	5.61924	4.53473	4.77111		Fam102b_2	3.06668	3.36127
Bet1_1	1.72104	2.05839	7.38607	3.69481	2.75043	2.00656		Plod2_2	3.75158	2.62212
Abhd14b_1	3.65074	3.36403	4.77854	6.24613	0.945832	4.95794		Atm_1	3.75921	2.50379
Atp5h_1	0.580735	1.30121	6.37417	4.54455	1.97299	5.46842		Sod2_2	3.55546	2.62349
Nsf_1	4.64323	3.40071	7.09617	3.77418	5.11048	3.71515		Athl1_2	3.27389	2.90421
Ywhae_2	1.92052	2.94627	4.99552	5.71868	5.66333	5.26702		Eif4g1_2	2.77297	3.18461
Sod2_2	3.29293	3.93349	5.51163	5.11739	3.70922	2.74739		Rai1_2	3.38719	2.52668
Sod2_1	1.3637	2.37895	5.28968	5.31431	5.11086	5.07928		Arl4c_2	3.28551	2.62658
Hadh_2	1.69367	2.99524	6.4059	4.14461	0.572777	4.51853		Nudc_2	3.14107	2.46322
Fbxo32_2	2.69315	3.66593	6.72322	3.78541	3.53109	4.0699		Tead1_1	3.27567	2.3159
Mcm6_2	4.66898	5.40186	5.50018	5.00144	4.39614	6.20686		Abhd14b_2	3.08287	2.33387
Tbc1d9_2	1.64592	1.72415	4.99802	5.24679	1.32509	1.3947		Cep350_2	3.20905	2.10493
Mrpl42_2	1.42092	2.36531	4.71097	5.45682	1.9985	3.80459		Mtor_1	2.32776	2.95621
Sp1_1	1.56292	1.4681	5.90642	4.23513	-1.00613	1.77478		Sp1_2	2.57419	2.6278
Asap1_2	2.13437	3.33071	5.59957	4.40932	2.53035	3.76273		Tnfrsf1a_2	3.16105	2.03146
Athl1_2	1.81032	2.3402	5.57781	4.39411	6.46188	6.16706		Asap1_2	3.05714	2.13057
Atm_1	2.78316	2.35223	5.28532	4.64599	3.79524	2.52752		Pdpk1_2	2.98429	2.20325
Pdpk1_1	3.45657	3.02586	4.83133	5.09065	-0.05658	3.26555		Ywhae_2	1.99566	3.1765
Mrps27_1	3.06489	4.01829	4.24388	5.58233	2.37515	5.39465		Baiap2l1_2	2.50717	2.6297
Phf7_1	1.54029	1.98619	5.10967	4.70136	3.83961	3.04631		Cnot2_2	3.23257	1.7877
Nudc_2	2.03425	3.43235	5.62949	3.9437	3.68216	4.21033		Klf5_1	3.06923	1.91954
Pdpk1_2	4.34948	4.86103	5.23875	4.29361	4.64814	3.97592		Thap7_1	2.56431	2.38533
Hmgcs1_1	1.38233	3.74255	4.47268	5.05051	1.28814	2.24162		Rabep1_2	2.95892	1.94089
Gpank1_1	3.19837	3.84036	3.2846	6.22666	5.77916	6.214		Ythdc2_1	2.92834	1.94349
Atp5h_2	1.1289	1.83571	3.50597	5.80856	1.63148	4.33508		Ifi27l2b_2	2.72793	2.13028
Mrpl30_2	2.49582	2.23515	3.76267	5.32619	2.32297	5.59328		Csnk1g3_1	2.42421	2.38287
Akap12_2	2.08935	3.41867	5.67728	3.39191	0.636699	0.661514		Fbxo32_2	3.40942	1.37849
Acvr1b_1	2.00837	2.46152	5.16848	3.86482	4.54495	5.89507		Lemd2_2	2.42241	2.3128
Tnfrsf1a_2	1.1444	1.56776	5.06237	3.92099	2.54422	4.62886		Crk_1	2.10924	2.62174
Psme3_2	3.55998	5.0457	1.90891	7.01297	2.42663	3.92347		Hadh_2	2.43363	2.26833
Csnk1g3_2	2.67935	2.60132	4.27172	4.51721	2.49889	3.81012		Pdpk1_1	2.3687	2.2887
Arl4c_1	2.84298	3.4358	3.49876	5.24762	5.7533	4.80772		Crkl_2	2.08705	2.54446
Klf5_1	0.734252	0.832371	6.16701	2.54313	0.996741	2.75398		Ick_1	2.10689	2.52216
Ildr1_1	-0.437799	0.876277	4.14619	4.55534	2.88679	3.03867		Gpank1_1	1.93553	2.64965
Mzt2_1	1.17568	1.05119	5.17259	3.4691	3.45697	2.82172		Mcm6_2	1.91368	2.49503
Rabep1_2	1.92772	2.62976	4.63598	3.9685	3.33649	4.47753		Mzt2_1	2.67906	1.69692
Nudt1_1	1.56425	1.25502	5.1176	3.44466	0.388436	1.22469		Ick_2	2.4414	1.9233
Zbtb10_1	0.654354	0.522087	4.86995	3.66849	1.02667	2.02854		Plcl1_1	2.89271	1.45418
Rps6ka1_1	1.61897	2.13589	4.58453	3.89644	2.81423	2.53974		Acvr1b_1	2.20659	2.12776
Mdp1_2	1.43423	1.31816	4.94288	3.52809	1.74328	2.69819		Nln_1	2.87815	1.39301
Fxn_2	1.86329	2.37045	5.46388	2.97524	2.33794	2.0263		Tbc1d9_2	1.91149	2.26525
Cln8_2	1.33803	2.21629	4.32334	4.09396	3.15626	2.38854		Akap12_2	2.2513	1.91385
Csnk1g3_1	1.96389	1.23818	4.22268	4.09323	0.555066	3.77127		Sp1_1	3.2247	0.919983
Crk_1	2.403	1.93112	4.55592	3.72869	4.22374	5.05516		Acp6_1	2.61089	1.50463
Slc20a2_2	0.912765	0.763776	4.63711	3.61328	3.40522	1.53044		Mrpl30_2	1.74035	2.32063
Lrrc57_2	1.86712	1.48618	4.47877	3.61855	2.93289	3.41719		Mrps27_1	1.82179	2.16152
Cep350_2	2.73967	1.66485	4.89738	3.16978	3.19796	1.81821		Ildr1_1	2.15485	1.80187
Sar1b_1	2.02019	2.34555	3.34182	4.63044	2.92412	2.31494		Ifi27l2b_1	2.22265	1.73194
Nln_1	0.928125	1.62468	3.57415	4.35237	2.71978	1.65458		Diap2_2	2.43283	1.44855
Ythdc2_1	1.09051	2.15685	4.38803	3.4961	-0.240075	0.384103		Rac1_1	2.00461	1.86791
Mrpl42_1	0.796895	1.60868	3.05483	4.82456	3.60188	7.6163		Spryd4_2	2.90068	0.963478
Mrpl21_2	0.949168	1.07433	3.97794	3.87349	1.65211	4.02275		Wasl_2	1.91781	1.89463
Wee1_2	3.9832	3.59117	4.20414	3.63723	5.10247	8.28878		Fxn_1	2.31686	1.46522
Setd1b_1	1.54132	2.83024	5.11762	2.70285	2.17985	1.70835		Lrrc57_2	1.97161	1.75202
Baiap2l1_1	1.47522	2.41527	4.47448	3.31088	2.41818	3.50982		Atpaf1_1	2.22509	1.48757
Mrpl16_2	1.31179	1.59959	4.68078	3.10116	2.97791	3.92883		Cln8_2	1.73653	1.96536
Acp6_1	1.7111	1.71101	2.42698	5.31464	2.96045	1.71352		Zfp422_1	1.8742	1.78751
Iars2_1	1.07165	1.4237	3.73834	3.85819	1.22826	0.247718		Pik3ca_1	2.24689	1.39678
Zfp36l2_2	1.5908	2.03176	3.86102	3.69301	4.02882	5.1407		Wee1_2	1.50199	2.10383
Hmgcs1_2	1.32778	1.35482	3.12191	4.40312	1.35654	4.62058		Bet1_2	1.85726	1.70171
Rac1_1	1.80105	1.57888	3.56408	3.95359	3.70331	4.14988		Phf7_1	1.88798	1.66758
Top3a_2	1.06453	1.55419	3.84149	3.64894	0.209979	-0.0190973		Fam102b_1	2.26351	1.26008
Nck2_1	0.384511	1.29866	4.43749	3.0524	0.378145	1.65012		Rabgap1_1	2.17688	1.30325
Wasl_2	2.61466	1.88962	5.85506	1.61993	2.64587	1.45798		Raf1_1	2.01762	1.45617
Lss_2	2.19642	2.10156	3.83807	3.6079	2.45503	3.69112		Mrpl16_2	2.0462	1.40586
Crkl_2	0.831721	1.77004	2.77594	4.61542	5.10407	2.66683		Mia2_1	2.0668	1.38441
Lemd2_2	1.62063	1.99133	4.34207	3.04391	3.4744	3.37367		Sar1b_1	1.45786	1.98389
Plcl1_2	1.24032	0.921292	3.72114	3.64099	1.70574	3.15343		Fxn_2	2.32895	1.10219
Rc3h1_1	0.933686	1.11519	4.66621	2.59379	1.90859	4.7968		Arpc3_1	1.34498	2.08154
Cd274_1	0.83943	1.37953	4.25129	2.99627	2.21508	2.15517		Asap1_1	1.65604	1.73779
Sar1b_2	1.42743	1.78405	4.61237	2.56039	1.63092	1.85512		Ydjc_1	1.84336	1.52452
Ccdc99_1	1.7851	1.525	4.61772	2.53962	3.16149	3.23219		Csnk1g1_2	1.49405	1.86062
Rai1_1	1.40985	0.969512	3.60587	3.55	-2.65753	0.699638		Hmgcs1_1	1.84905	1.47792
Tbc1d9_1	1.47734	0.569989	3.99572	3.14918	2.88944	3.82266		Ccdc99_1	2.03001	1.29435
Wrb_2	2.39736	2.04947	3.51685	3.60863	-0.126119	2.06519		Cd274_1	2.20015	1.08105
Fxn_1	1.74988	2.52747	4.47968	2.64104	3.2692	3.98737		Akap12_1	1.66117	1.6163
Spryd4_2	3.32029	2.4311	4.32918	2.70026	3.20035	2.37477		Nudt15_1	1.37583	1.85581
Srf_1	0.675695	1.58778	3.95818	3.01294	0.910541	3.62037		Wrb_2	1.22218	2.00218
Slx1b_2	1.12103	0.99266	4.05893	2.83517	2.20528	2.97669		Tagln2_1	1.34294	1.84305
Ywhae_1	1.61207	3.38296	3.57657	3.30802	2.4116	3.56318		Gca_1	1.75723	1.39703
Plcl1_1	0.315103	0.703082	4.24401	2.62825	3.28287	2.02128		Mrpl42_2	1.4167	1.69305
Thap7_1	-0.311467	1.36965	4.86221	2.00778	2.65298	1.98425		Rpp38_1	1.51775	1.58564
Ddx3x_1	-0.322786	0.665438	4.15066	2.71405	0.21007	0.643275		Zfp36l2_2	1.51727	1.58594
2810021B07Rik_2	0.85424	0.981001	3.59807	3.19034	1.01492	1.47411		Rps6ka1_1	1.99995	1.07242
Ghr_2	1.48081	2.29202	3.07152	3.69681	1.52784	3.58619		Mrpl42_1	1.07238	1.97603
Ick_1	2.23409	3.04015	4.22914	2.53905	3.53525	2.79689		Atm_2	1.51638	1.52919
Diap2_2	1.10414	1.33816	3.04959	3.69766	1.43574	2.0353		Top3a_2	1.90288	1.12696
Tagln2_1	2.12662	1.54962	3.15351	3.58113	1.63819	3.19577		Csnk1g3_2	1.02951	1.98549
Bet1_2	2.29633	2.49201	2.74135	3.97923	2.74205	4.24996		Mtif3_1	1.52985	1.4739
Rpa2_1	0.874619	0.557731	3.65849	3.036	3.75948	2.5406		Rpa2_1	1.61545	1.37043
Mia2_1	1.34086	0.700557	3.24385	3.44716	0.977939	2.57586		Ndrg3_1	1.47371	1.50204
Cry1_2	2.203	1.2459	4.48067	2.17177	1.99562	2.82594		Baiap2l1_1	1.53276	1.43643
Ndrg3_1	1.1802	1.68711	2.71957	3.92604	2.49808	2.64228		Ripk2_1	2.30327	0.645163
Ssx2ip_1	-0.0186292	1.08071	3.14798	3.39996	1.45873	2.93091		Eif4a1_1	1.92637	0.968921
Pld1_1	0.390385	0.4451	2.72693	3.80696	-2.96543	-0.139773		Psme3_2	1.48782	1.38914
Vps11_1	0.593132	1.2924	3.31647	3.16431	-1.61087	0.353156		Bet1_1	1.65916	1.2139
Tagln2_2	0.760117	1.14586	3.31443	3.1651	1.30667	2.7763		Rps6ka1_2	1.22061	1.64948
Anapc5_2	-0.392474	0.166459	3.20683	3.27179	1.22299	0.356989		Anapc5_2	1.63942	1.22095
Ppp3ca_1	0.929484	1.0572	3.2426	3.23181	3.32847	3.87576		Aox1_2	1.3428	1.51179
Evi5_2	0.623926	0.410009	2.86125	3.56662	1.94548	2.52014		Psme3_1	1.80343	1.04522
Setd6_2	0.0571601	0.897424	3.36758	3.02029	-0.0270652	1.76982		Xpo1_2	1.531	1.30061
Arl4c_2	2.47177	2.89783	4.20294	2.16944	-0.02545	2.02153		Gtf2h3_1	1.56774	1.26307
Cep350_1	1.36229	1.7415	3.56889	2.80042	4.94423	5.49665		Dpm2_2	1.2546	1.55497
Mrpl10_2	0.60868	0.368003	2.79204	3.57128	1.27363	4.03448		Sema6d_2	1.82115	0.973749
Top3a_1	0.503715	1.6839	3.92116	2.39616	2.40059	0.802619		Ghr_2	1.68962	1.10144
Mrpl10_1	1.86341	1.67061	3.02775	3.27993	2.66246	3.43243		Sra1_1	2.30046	0.490143
Ptprk_1	1.73881	1.56974	3.96509	2.33417	-0.208896	1.47265		Ipp_2	1.50467	1.26659
Ifi27l2b_1	1.2472	0.536364	3.44501	2.80565	2.37818	3.14536		Tnrc18_1	1.40428	1.36642
Smug1_2	1.08902	1.31353	3.46208	2.74866	2.31079	2.58826		Tbc1d9_1	1.6519	1.11055
Smug1_1	-0.358865	0.639434	2.99662	3.2105	-0.798698	1.81514		Mrps26_2	1.42574	1.32498
Wrb_1	1.23624	2.15294	3.17686	2.98694	1.58318	3.71592		Atp5h_1	1.2962	1.45436
Letm1_2	1.73644	1.95382	2.96357	3.18747	2.22827	3.8288		Smug1_2	1.48726	1.25355
Baiap2l1_2	-0.246602	1.01609	4.32077	1.80787	0.897619	3.1853		Fam36a_1	0.940098	1.78526
Mtif3_1	0.669696	1.62029	4.4381	1.68482	1.86808	4.39609		Tagln2_2	1.44268	1.26378
Akap12_1	1.29038	0.978943	2.48209	3.63691	1.61588	2.64529		Evi5_2	1.46292	1.24292
Crkl_1	0.327031	0.0481443	2.72078	3.39654	1.11909	1.66784		Slc7a1_2	1.59061	1.0968
Fam36a_1	0.661105	1.70949	2.32956	3.76979	0.313414	4.11412		Ndufa8_1	1.76518	0.898596
Gtf2h3_1	0.823656	0.173838	3.81264	2.26015	0.66009	3.68577		Tgif2_1	1.49736	1.15247
Mdp1_1	0.71842	0.988078	3.06002	2.98321	1.0339	0.954815		Csnk2a2_2	1.4774	1.16997
Mrpl52_1	1.00635	1.4777	2.48951	3.54747	0.817373	4.00198		Spryd4_1	1.19578	1.42763
Raf1_1	1.86889	1.89792	4.01405	2.01983	2.8322	1.11833		Ssx2ip_1	1.73718	0.876905
Atpaf1_1	0.762671	0.825822	3.14417	2.88124	1.51155	1.6298		Gpank1_2	1.59678	1.00755
Tubb5_2	2.43384	2.41155	1.38693	4.61082	2.49356	6.69245		Slx1b_2	1.6155	0.985769
Qrich1_1	0.492281	1.43859	3.59419	2.39891	1.64353	1.02079		Mdp1_2	1.54909	1.04823
Eif4a1_1	0.590462	1.68181	2.71138	3.25957	1.75121	2.16878		Mkln1_1	1.96778	0.623724
Mrpl30_1	0.398297	0.682358	3.66775	2.25027	0.323008	2.05821		Mrpl30_1	1.41708	1.17186
Cldn6_2	-1.60182	0.435244	3.26046	2.62888	1.36509	2.61792		Abcb1a_2	1.24622	1.32361
Fads6_2	0.85264	0.437253	3.17624	2.71132	1.61508	2.12573		Arpc3_2	1.60451	0.960522
Rps6ka1_2	1.32352	1.06851	2.27667	3.58697	-0.688168	1.71553		Rc3h1_1	1.20765	1.33851
Nfkb1_2	0.183491	0.802708	3.81776	2.0425	0.0750769	3.46682		Il23a_2	1.39835	1.14005
Zfp36l2_1	0.886917	0.931559	2.88155	2.97053	1.47736	2.59806		Nfkb1_1	1.45739	1.04654
Mrpl24_1	1.24681	2.16883	3.48125	2.35687	2.51019	2.77779		2810021B07Rik_2	1.39462	1.09865
Ly6c1_1	-0.408078	0.0448883	3.07522	2.63696	1.11245	2.33289		Mctp1_1	1.82652	0.661604
Mrps26_2	-1.25479	0.265959	3.36662	2.34352	2.11136	3.81378		Rai1_1	0.860055	1.62352
Rac1_2	1.51865	1.60433	3.29356	2.41076	1.74821	2.65557		Crk_2	1.17061	1.27153
Aip_1	0.841149	1.78721	3.65684	2.02102	0.885732	3.03264		Tbc1d5_2	1.51661	0.881628
Bcap29_1	0.92394	0.14795	3.02478	2.65068	2.63354	2.32381		Setd1b_1	2.08448	0.311537
Anapc2_1	0.5759	1.19346	2.36418	3.29781	0.924431	2.49033		Mrpl10_1	1.49345	0.89182
Zfp810_1	1.08984	1.66124	2.48712	3.15932	2.12121	2.6892		Mrpl21_2	1.02618	1.32803
Mapk9_2	0.815934	1.90666	3.95851	1.67411	1.80601	1.45583		Vps11_1	1.49917	0.853296
Sema6d_1	0.861485	0.943382	2.07433	3.54019	1.68716	1.9629		Top3a_1	1.77573	0.555332
Mkln1_1	1.56184	2.39083	3.32548	2.27938	2.12573	3.10644		Nox4_1	1.97694	0.326084
Klf5_2	-0.203312	0.0498778	3.12948	2.42959	-0.44811	0.00308301		Tspo_1	1.23737	1.06207
Klf6_2	1.294	1.66116	2.8167	2.73812	0.182816	1.20056		Ndufaf4_2	1.53648	0.761429
Zfp422_1	0.881611	1.28999	4.51736	0.999371	3.536	5.25406		Pld1_1	1.15907	1.1297
Tspo_1	0.599364	0.88447	3.15989	2.34408	1.21115	1.43077		Cry1_2	1.32767	0.947051
Klhl10_1	0.264277	1.48146	2.42536	3.05438	0.391523	2.96777		Atp5h_2	0.868673	1.38895
8430406I07Rik_2	0.883813	2.1176	3.00733	2.45136	2.67689	1.64226		Ptprk_2	1.28886	0.944615
Fam102b_2	1.34113	1.19838	3.62356	1.83173	2.88419	4.3133		Setd6_2	1.43467	0.790758
Gspt2_2	1.87157	2.3424	1.8463	3.55217	3.8583	3.59824		Nfkb1_2	0.961768	1.22948
Slc7a1_2	-0.0258389	0.655697	2.6579	2.73254	1.9507	-0.656092		Ppp3ca_1	1.2512	0.933102
Ick_2	1.05118	1.6499	2.78149	2.60557	3.52699	1.82743		H13_2	1.37981	0.794878
Pik3ca_1	1.75744	1.94408	3.04869	2.29501	3.20953	3.14681		Zmym5_2	1.41687	0.755829
Rnf125_2	1.01065	0.121331	2.2098	3.09882	1.83549	1.94869		Katnb1_2	0.807937	1.36014
Vapa_2	0.53585	1.33386	3.08316	2.20843	1.5003	3.02483		Gls2_2	0.841489	1.31619
Rwdd3_1	-0.981886	-0.770331	3.21933	2.06112	0.0678435	-1.34827		Slc20a2_2	1.15799	0.989281
Tpr_2	0.649895	-0.346068	4.2659	1.00911	4.29256	4.58393		Mrpl24_1	1.60703	0.521109
Lrrc57_1	1.42892	2.25587	3.3576	1.91378	1.56233	4.14526		Srf_1	1.07287	1.05342
Ndufa8_1	1.46476	1.4792	2.56491	2.68539	2.09205	1.33662		Zbtb10_1	2.10278	0.0230642
Sema6d_2	0.328407	0.525845	2.54555	2.69105	0.569745	1.61446		Rwdd3_1	1.47137	0.648207
Zfp422_2	1.53189	1.64909	3.9156	1.30834	2.55045	2.36544		Plcl1_2	1.00008	1.08581
Spryd4_1	0.283234	0.128409	2.48009	2.74047	2.64565	2.73471		Ccdc99_2	1.2405	0.843317
Mrpl20_2	0.638611	1.16886	2.61025	2.59624	1.1061	4.12005		Rac1_2	1.18079	0.887367
Ndufaf4_2	0.859491	1.10996	3.23067	1.93826	0.79158	2.28982		Sema6d_1	1.28599	0.707736
Qrich1_2	1.19449	1.55884	2.97962	2.17754	1.88192	0.327412		Mdp1_1	1.13872	0.845257
Aox1_2	1.34455	0.726657	2.53786	2.56986	2.60665	3.13758		Mrpl19_2	1.42204	0.561071
Mrpl24_2	2.02255	2.27217	2.34109	2.75966	2.05566	1.65634		Lrrc57_1	1.56989	0.400035
Vrk3_2	0.287769	-0.285197	2.90009	2.19825	0.968252	2.25432		Fgfrl1_1	0.62086	1.30216
Limk2_1	1.36257	1.65906	2.92725	2.16592	0.59504	0.807862		Crkl_1	0.959879	0.961026
Ghr_1	0.80571	1.45242	2.39966	2.68282	2.01174	2.06923		Fads6_2	1.47005	0.43418
Il23a_2	-0.928907	1.49085	1.66278	3.40716	3.62061	2.84832		Tmem33_1	1.03806	0.86421
Dap_1	0.496332	-1.2766	2.83555	2.22388	2.26684	0.994754		Hmgcs1_2	1.06623	0.827183
Xpo1_1	1.43243	1.64766	2.41685	2.63765	1.90163	1.93176		Ywhae_1	0.8691	1.0213
Mrpl39_2	0.86449	1.21228	3.16628	1.88758	-0.464457	2.14428		Smad7_1	1.50277	0.382969
Pkn2_2	0.462573	0.633203	2.26269	2.78448	0.576961	1.2385		Dpm2_1	1.20738	0.677626
Wnt7b_2	0.25883	1.1787	3.74127	1.28133	1.84251	2.19858		Mbtd1_2	0.937241	0.912714
Letm1_1	0.716723	1.52275	3.03242	1.97928	-1.59033	2.11446		Il23a_1	0.880263	0.9548
Abcb1a_2	1.21491	1.48274	2.04507	2.94989	2.54137	2.26076		Ndufb3_2	1.07974	0.726988
Dpm2_1	0.552516	1.08893	3.27681	1.71244	1.76475	0.664675		Nck2_1	1.04159	0.749963
Ifi27l2b_2	1.66225	1.67107	3.54324	1.4452	3.56961	4.51487		Nktr_2	1.25051	0.530559
Csnk2a2_2	2.01884	2.23279	2.86279	2.11389	4.54095	5.42071		Bcap29_1	1.08508	0.694217
Evl_1	0.169313	-0.266232	3.48533	1.49063	0.219317	-0.443356		Zfp810_1	0.75317	1.026
Otud5_1	0.372611	-0.201991	2.33777	2.62806	1.16456	0.626315		Tpr_2	0.638135	1.13582
Ipp_2	0.0776839	-1.87387	2.3067	2.65893	2.11095	4.24683		Gspt2_1	0.958397	0.797666
Ly6c1_2	1.27593	1.62862	2.8062	2.13949	1.13069	0.756228		Rabep1_1	1.09427	0.661284
Mapk9_1	0.966802	1.04389	2.95603	1.98002	1.72227	2.14132		2810021B07Rik_1	0.837375	0.906699
Tbc1d5_2	0.746181	-0.370823	3.12048	1.80114	2.37186	2.3449		Cln8_1	1.11038	0.624611
Rnf125_1	0.687603	0.894968	3.04064	1.87879	1.13702	0.192435		Wee1_1	0.62296	1.10592
Mrpl39_1	0.850083	1.02547	2.87945	2.03477	-0.402153	2.12004		Phf7_2	0.695879	1.02094
Ptprk_2	0.665649	0.317864	3.47452	1.42861	2.01857	2.47734		Otud5_1	1.30346	0.397388
Xpo1_2	-0.28247	0.428528	2.62396	2.27377	1.53184	2.07711		Xpo1_1	0.690086	0.992806
Fam20b_2	1.10026	1.00649	2.70995	2.17562	2.63895	1.72094		Klhl10_1	0.999637	0.672257
Fam96a_2	0.916458	0.432829	2.72044	2.11161	1.42662	1.64325		Iars2_1	0.945749	0.711376
Epb4.1l2_1	0.512081	-0.16754	3.65439	1.14514	1.45675	-1.68158		Oxnad1_2	1.58037	0.0535485
Wee1_1	3.61789	4.35866	2.78936	2.00951	3.88112	4.04938		Whsc2_1	1.03097	0.597144
Tgif2_1	1.19288	1.03745	2.27212	2.46509	1.36269	0.244902		Mapk9_2	1.14256	0.443136
Hist3h2ba_1	0.848555	1.29221	2.34439	2.33262	1.07747	1.23187		Ndrg3_2	0.843348	0.731229
Ripk2_1	0.299901	0.754258	2.70955	1.96309	0.484122	2.08335		Pkn2_2	0.794653	0.74957
Atpaf1_2	1.03662	1.3293	2.58114	2.08957	0.399691	1.21348		Mkln1_2	1.08639	0.454073
Rabep1_1	0.86893	1.82549	3.16239	1.48028	3.14119	2.72174		Setbp1_1	1.08289	0.457176
Phf7_2	0.66225	0.501022	1.21484	3.42086	1.13444	1.61301		Slc12a9_1	1.02198	0.467704
Sra1_1	-0.964365	-0.819012	2.94835	1.6818	0.56868	1.80524		Zfp36l2_1	1.25085	0.226712
Gca_1	1.20425	1.16541	2.63999	1.97339	1.85254	2.47463		Lss_1	1.21014	0.265943
Ppfia3_1	0.902258	-0.36418	2.77308	1.82775	2.60042	4.1746		Agpat6_1	1.3862	0.0863217
Slc12a9_1	-0.111893	-0.0941003	2.40402	2.19032	-0.200457	1.44847		Diap2_1	0.696844	0.751465
Rabgap1_1	0.700218	0.763618	2.39238	2.19007	0.523123	0.868778		8430406I07Rik_2	0.418119	1.02773
Zmym5_1	0.487401	0.730691	2.78707	1.76681	-0.319049	1.38597		Lss_2	0.935933	0.480829
Sppl3_1	0.582426	1.20993	3.12921	1.40765	2.40948	1.12669		Cdhr5_1	1.04025	0.367885
Ciz1_2	0.0700673	0.522912	2.71743	1.80329	0.779537	0.676031		Rnf125_1	0.705167	0.698199
Asb8_2	-0.164937	-0.358508	3.23446	1.28155	1.44706	-0.173438		Spata24_1	0.670243	0.712352
Scin_2	-0.723645	-0.0595617	1.88924	2.61126	-0.782956	0.919492		Epb4.1l2_1	1.19241	0.185072
Mettl22_1	0.34326	0.519456	2.62973	1.85509	-0.576443	1.11661		Mrpl20_2	0.151823	1.22025
Npas1_2	-0.149161	-0.880152	2.61402	1.86627	1.83563	3.26901		Zbtb10_2	0.576654	0.785498
Tubb5_1	0.759726	-0.225477	1.79801	2.66737	3.20125	3.68543		Cryab_1	1.11354	0.247618
Whsc2_2	1.4773	2.12136	1.58664	2.87607	2.68671	3.89732		Ndufaf4_1	0.788808	0.563542
Jun_2	0.562834	-0.0286476	2.24199	2.21888	-2.58566	-1.09675		Fam20b_2	1.23204	0.11753
Nck2_2	-0.536711	-0.0925934	2.19776	2.25177	1.69072	2.02705		Yme1l1_2	0.330772	1.01625
Csnk1g1_1	0.615934	0.695433	2.15709	2.27984	1.93445	1.19307		Hist3h2ba_1	1.04777	0.279116
Tmem33_1	0.438434	0.993752	1.94157	2.47471	3.48114	3.21902		Mapk9_1	0.786586	0.538231
Mrps27_2	-0.130102	0.546171	2.00306	2.40003	1.61148	4.1224		Srf_2	0.59299	0.731451
Fam102b_1	1.66588	1.97858	1.92823	2.45342	2.55604	1.74451		Mrpl10_2	0.886654	0.43775
Ddx19b_1	-1.02529	-0.840158	3.14317	1.22732	-0.623211	-1.67826		8430406I07Rik_1	0.742901	0.579802
Nfkb1_1	0.398448	0.459682	1.85377	2.51575	-3.44107	0.311833		Ly6c1_2	1.09533	0.226905
Mrpl19_1	0.565291	0.535533	2.65296	1.70251	1.52674	1.72581		Mrps27_2	0.622397	0.699383
H13_2	0.864526	0.445492	1.80008	2.55211	2.08928	0.647766		Mrpl14_1	0.800786	0.517631
Mrpl54_1	0.231335	0.973429	1.58939	2.76063	1.02126	2.9305		Mrpl16_1	0.738903	0.578878
Oxnad1_2	1.39174	2.18789	2.43256	1.91051	0.319187	0.440245		Dap_1	0.637285	0.680091
1810055G02Rik_1	-0.518276	-0.132626	2.76228	1.56633	1.385	3.01639		Ghr_1	0.631855	0.675936
Ndufb3_2	0.278212	1.30911	1.0586	3.26814	0.241877	1.8567		Zmym5_1	0.72168	0.555415
Mctp1_1	0.823567	-0.719297	2.46093	1.84511	2.6368	4.22645		Rnf125_2	0.338275	0.902346
Tmem33_2	-1.06098	-0.209827	1.96211	2.34005	0.418934	3.25888		Ywhah_1	-0.360441	1.58882
Vapa_1	-0.0449962	0.241447	2.17559	2.10598	1.61556	2.81322		1810026J23Rik_1	1.0128	0.204724
Rpp38_1	1.29311	0.133586	2.95341	1.30722	-0.507227	0.598876		Tbc1d5_1	0.784074	0.409864
Mrpl19_2	1.13072	1.26678	1.51088	2.73035	1.46828	1.18001		Atpaf1_2	0.62234	0.562978
Fgfrl1_1	1.67828	0.811459	0.773037	3.46245	1.22215	2.29591		Vapa_1	0.558988	0.608922
Sppl3_2	0.889442	0.861571	2.07547	2.15859	-0.497793	2.0763		Mrpl39_1	0.893246	0.274
Asap1_1	1.84848	1.09934	1.88214	2.29521	3.11188	3.17813		Plcb1_1	1.07047	0.0682617
Ccdc99_2	-0.225816	-0.0670338	2.0375	2.11581	0.619151	1.64603		Nck2_2	0.775385	0.354621
Tnrc18_2	0.379899	0.335037	2.74916	1.37164	0.250195	1.70103		Fam96a_2	0.547533	0.573056
Anapc2_2	0.0199794	0.418253	1.87385	2.22916	0.271945	0.776646		Pik3ca_2	0.566137	0.537605
Mrp63_2	0.626627	1.08036	0.991472	3.10376	0.858194	3.48265		Oxnad1_1	0.462859	0.630813
Tbc1d5_1	1.25428	1.87609	2.18756	1.8898	2.12246	2.74476		Nsun4_1	0.548654	0.534998
Grhl3_1	0.804234	0.78428	1.77702	2.28048	-0.181807	0.359748		Mrpl54_1	0.648191	0.432127
Ywhah_1	0.472813	-0.000754694	1.48039	2.55637	-1.2978	1.19247		Ydjc_2	1.17742	-0.104795
Mrpl16_1	0.730483	1.28595	2.06295	1.97365	0.508395	2.66755		Fam96a_1	0.430546	0.630199
Ikbkg_1	0.667477	0.840737	1.77218	2.23375	0.175939	1.78401		Csnk1g1_1	0.679	0.377052
Ndrg3_2	-0.187791	0.684995	1.47658	2.47851	1.20758	0.297415		Letm1_2	0.209204	0.844763
1810026J23Rik_1	-0.057208	0.416568	2.9429	1.00981	1.12696	1.23835		H13_1	0.736708	0.31045
Nudt15_1	1.17723	1.06773	2.39955	1.5189	0.434909	1.69215		Mettl22_2	0.769954	0.270073
Nox4_1	-0.627313	0.605949	3.29837	0.611947	1.37568	0.740567		Sar1b_2	0.62997	0.380116
Zmym5_2	1.05776	0.419655	2.02464	1.86634	2.54549	1.08155		Mrpl52_1	0.391639	0.599693
Fam36a_2	-0.14036	0.743877	2.00673	1.80431	-0.0853997	1.69001		Athl1_1	0.864268	0.11166
Clybl_1	-0.745464	0.271704	2.31676	1.48901	0.0941879	-2.36423		Evi5_1	0.127103	0.840815
2310033P09Rik_2	-0.698439	-0.342657	2.33879	1.45148	1.34637	3.4791		Hadh_1	0.117096	0.84591
Evi5_1	0.514459	0.387337	1.56236	2.22711	1.35567	2.60283		Vrk3_2	0.845026	0.0996364
Bcap29_2	-0.121487	-0.113613	1.64984	2.13518	0.462745	0.979885		Bcap29_2	0.740955	0.181381
Dap_2	-0.0484558	0.774116	2.47587	1.29279	0.880932	0.228302		Mrpl24_2	0.280797	0.617125
Csnk2a2_1	0.308923	0.556169	1.26016	2.50781	1.4915	1.88806		Fbxo32_1	0.83133	0.062197
Yme1l1_2	0.256725	0.961762	1.43351	2.29238	0.327797	2.27049		Npas1_2	0.629972	0.252926
Ywhah_2	0.904845	0.573516	2.33004	1.3509	1.05335	0.972941		Slx1b_1	0.141564	0.734554
Setd6_1	0.0439851	0.868485	1.20149	2.47188	0.314151	-0.387697		Gspt2_2	1.19324	-0.323844
Ripk2_2	1.60735	1.42472	1.87401	1.78485	1.68614	2.03661		Slmap_1	0.476353	0.385833
Mtif2_1	0.420722	0.151799	1.64897	1.99087	1.73249	2.51531		Klf5_2	1.23461	-0.373819
Otud5_2	0.360868	0.379565	1.17009	2.4104	0.990339	2.65618		Qrich1_1	0.758932	0.0822561
Lss_1	0.373627	0.0519376	1.8715	1.70451	0.982818	1.44673		Tpr_1	0.636591	0.192732
Vps11_2	1.4206	1.74348	1.17232	2.39867	0.804906	2.18458		Ripk2_2	0.529547	0.291677
Csf2ra_1	-0.00176585	0.803295	1.31361	2.257	-0.0710623	0.254856		Mbtd1_1	0.215721	0.60398
Smad7_1	0.944183	0.63643	1.59797	1.967	0.725347	1.40644		Vapa_2	0.65223	0.16518
Slc12a9_2	1.15169	0.467727	1.62102	1.94001	1.56441	2.04083		Xrn2_1	0.411939	0.396636
Atm_2	2.04248	2.9672	1.29364	2.25814	2.70934	2.59775		Tubb5_2	0.152538	0.645796
Pik3ca_2	2.47801	1.40346	1.66709	1.88458	2.19709	3.00429		Cd55_1	0.822032	-0.027188
Mkln1_2	0.884695	1.05402	1.97975	1.55572	2.9057	3.07458		Wasl_1	0.584524	0.206456
Slc22a18_1	-0.0830769	-0.423694	1.81191	1.66159	1.46804	0.334434		Adi1_2	0.265409	0.500229
Il23a_1	0.254273	-0.184027	1.7842	1.68035	1.10118	3.11255		Fads6_1	0.364534	0.400683
Arpc3_1	1.38474	0.289423	1.04519	2.41872	3.19796	2.94455		Nudt1_1	0.153556	0.610801
Mettl22_2	0.401238	0.936142	1.30737	2.12452	1.20056	0.401722		Mrp63_2	0.109286	0.654767
Gls2_2	0.0724984	0.849406	1.53476	1.88543	2.39076	2.3184		Scin_2	0.353725	0.403725
1810026J23Rik_2	2.04711	2.10167	2.14617	1.26684	0.325019	2.6784		Sppl3_1	0.872368	-0.11593
Rasgrf2_1	-0.368383	1.50694	2.05158	1.35601	0.210555	0.157346		Ddx19b_1	0.728281	0.0278298
Fam96a_1	0.173765	0.078898	2.40231	0.971641	0.506199	1.26624		Otud5_2	0.408186	0.339115
Arpc3_2	0.891927	0.609715	2.81698	0.555459	1.98309	3.35657		Slc12a9_2	0.186785	0.539751
2810021B07Rik_1	0.92971	0.818907	1.81024	1.54108	2.02705	1.21484		Lass5_1	0.121598	0.598103
Cd55_1	0.468423	0.216001	1.53355	1.80711	0.380121	0.150588		Gtf2b_2	0.233644	0.476875
Mbtd1_1	-0.593345	-0.749219	1.68557	1.63258	-0.485562	0.433504		Mctp1_2	0.229957	0.475074
Gtf2b_2	0.00731753	1.02578	1.6046	1.68355	-0.677125	1.37165		Tfap2b_1	0.904482	-0.202433
Nktr_2	0.203149	0.446338	1.17443	2.09256	2.03349	3.15045		Setbp1_2	0.613728	0.0803474
Tnrc18_1	-0.801951	-0.754069	1.89719	1.35772	2.06267	3.12787		Tmem33_2	0.706361	-0.0160567
Gpatch1_2	1.2447	1.52066	1.53464	1.65289	2.13479	1.94955		Dap_2	0.82371	-0.146765
Ift52_2	0.0862761	0.325341	0.847824	2.32688	-0.310775	1.28042		Klf6_2	0.0189281	0.643978
Mrps26_1	0.156398	0.946299	1.65808	1.51442	1.89834	2.91377		Cnot2_1	0.391252	0.269378
Setd1b_2	-0.00875404	-0.535372	1.73858	1.42391	0.365094	1.2394		Ap4b1_2	0.749459	-0.106524
Cldn6_1	-0.0758193	-0.652683	1.36117	1.79462	-0.192166	-0.623304		Anapc2_1	0.896455	-0.265491
Csnk1g1_2	-1.13002	-0.71302	-0.0678577	3.19589	-1.1565	0.677742		Cldn6_2	-0.0211994	0.651687
Lass5_1	-0.0887543	0.906628	1.16952	1.9557	1.24676	1.10271		Ipp_1	0.641582	-0.011869
Dpm2_2	0.357429	0.637399	1.18795	1.91812	1.64471	1.96057		Csnk2a2_1	0.532345	0.0732477
Ppfia3_2	-0.350849	-0.665491	1.83075	1.25557	0.557633	2.71717		Klf6_1	0.847336	-0.251236
Acvr1b_2	0.228449	0.463323	2.8189	0.204534	1.77885	2.93058		Grhl3_1	0.445403	0.137252
Magee1_2	0.0450503	0.477073	1.13602	1.88167	-1.12534	-0.134328		Tnfrsf1a_1	0.468074	0.103255
Ydjc_1	0.890545	1.23056	2.53023	0.451454	2.18336	1.68611		Plod2_1	1.16053	-0.596577
H13_1	0.632203	0.760639	1.9967	0.983588	1.3195	2.24057		Polm_1	0.207752	0.348268
Agpat6_1	-1.30259	-1.52138	3.00574	-0.0330074	-2.05703	0.198031		Magee1_2	0.717666	-0.162494
Cd55_2	0.497435	0.97622	2.71271	0.235498	1.91291	1.33296		Eif4a1_2	0.612256	-0.061049
Fads6_1	-0.476842	-0.306915	1.70652	1.23528	-0.369251	0.368795		Car14_2	0.836493	-0.30571
Asb8_1	-0.130533	-0.401676	0.539567	2.3992	0.534451	-0.476958		Vps11_2	0.0262744	0.503974
Cryab_2	-0.34977	-0.909733	2.59665	0.309453	0.452584	1.02685		Rasgrf2_2	0.192308	0.333263
Srf_2	0.414224	0.927304	1.46484	1.44107	1.53196	1.80342		Dnajb4_1	0.350752	0.172637
Tnfrsf1a_1	-0.310556	-0.59491	1.05635	1.82422	0.551864	0.197259		Ddx3x_1	0.368342	0.1539
Zbtb10_2	0.399194	0.823435	0.926435	1.9515	1.20139	2.30698		Chrnb1_1	0.208749	0.305981
Xrn2_1	0.573727	0.453468	1.68586	1.19003	0.796698	-0.380338		Wnt7b_2	0.604837	-0.109022
Magee1_1	0.124774	0.19409	1.32446	1.53666	0.558176	1.70001		Stk36_1	0.61484	-0.12031
Ndufaf4_1	0.336866	0.11472	1.46561	1.39317	1.06508	2.02025		Slain2_1	0.39393	0.0965953
Nsun4_1	0.373843	0.73781	0.94066	1.90836	2.2633	3.94929		Smug1_1	0.113943	0.357628
Ap4b1_2	0.268891	0.415981	0.984136	1.86236	-0.233513	-0.599277		Aip_1	0.0981307	0.356297
Katnb1_2	1.69579	2.40922	0.6125	2.20533	3.76495	3.02687		Eif2ak2_1	0.482478	-0.0408631
Tfap2b_1	-0.000273084	-1.16269	2.32638	0.472542	-2.76272	1.53938		Setd6_1	0.574365	-0.143395
Nln_2	-0.774062	-0.00511889	1.37119	1.41592	0.755494	1.61539		Pdha2_1	0.37945	0.0479905
Chrnb1_2	-0.312149	-0.0124381	2.27565	0.460794	1.06203	0.765246		Acvr1b_2	0.864323	-0.441384
Setbp1_2	-0.585407	-0.569113	1.67382	1.06232	0.502063	1.76841		Anapc2_2	0.236824	0.184722
Evl_2	0.685727	0.0413017	1.49494	1.23744	1.66522	2.15766		Anapc5_1	0.46283	-0.0422886
Raf1_2	1.0321	0.272141	2.02317	0.685128	0.711896	0.444982		Yme1l1_1	-0.289468	0.699967
Cryab_1	1.22834	1.45571	1.12121	1.57105	0.466609	2.44814		2310033P09Rik_1	0.242767	0.163699
Mrpl14_2	0.00938187	0.231036	1.11801	1.56532	0.950828	3.72348		Whsc2_2	0.461616	-0.0565468
Tab1_2	0.183288	0.51248	1.37617	1.27084	1.04878	0.231324		Rpp38_2	0.893842	-0.539169
Fgfrl1_2	0.179498	-0.11565	1.54122	1.09856	-0.666685	-0.166457		Ndufb3_1	0.13671	0.21263
Ciz1_1	-0.483309	-0.879518	1.58056	1.01421	0.628472	0.721797		Ift52_1	0.129702	0.193485
Car14_2	0.351845	0.42746	2.09014	0.500199	0.461895	-0.281281		Zfp422_2	1.02494	-0.710425
Cdhr5_1	0.561843	-0.269588	2.16191	0.380322	1.37611	2.06533		Tcea3_1	0.261369	0.0512704
Plcb1_1	-1.29667	-1.68297	1.63996	0.880401	1.14987	0.582988		Mzt2_2	0.193744	0.108859
Gpank1_2	0.352014	-0.149712	0.632207	1.87438	2.01602	0.312659		Cyth2_2	0.229563	0.0584849
Vrk3_1	0.489895	-0.220076	1.86373	0.612843	0.825822	0.939619		Rad52_1	0.169959	0.0983778
Dnajb4_1	-1.12279	-0.322759	1.57161	0.902572	-0.592741	0.737272		Gabarapl2_1	0.254832	-0.00108929
Whsc2_1	-0.844489	-0.608042	1.2584	1.16	-0.0559836	1.78296		Xrn2_2	-0.125644	0.374593
Gca_2	-1.27753	-0.453692	1.22595	1.16229	0.22212	0.995391		Clybl_1	0.601408	-0.380793
Hadh_1	-0.737415	-0.738458	0.723094	1.65717	-0.170186	0.661891		Mtif2_1	-0.480498	0.700782
Diap2_1	0.415886	-0.0733274	1.55783	0.816488	1.87182	2.41818		Mrpl39_2	0.183734	0.033405
Ydjc_2	-0.7224	-0.466136	1.21313	1.10879	0.102131	1.26209		Evl_2	0.161613	0.0507213
Pdha2_1	0.370934	0.872165	0.136155	2.18559	1.19747	1.2182		Rwdd3_2	0.247519	-0.0357383
Oxnad1_1	0.423003	0.824844	1.15923	1.14828	1.07642	0.433355		1810055G02Rik_1	-0.129724	0.337947
Mrpl20_1	0.260192	0.199582	0.771003	1.51492	0.420043	1.62628		Ywhah_2	0.313779	-0.130883
Ppp3ca_2	0.263234	1.20172	0.728836	1.52283	0.575714	1.87132		Tcea3_2	0.20958	-0.0380502
Eif4a1_2	-0.156176	-0.854343	1.39234	0.855357	1.70276	1.33433		1810026J23Rik_2	-0.0578948	0.202402
Ccbl2_1	-0.202581	0.863223	1.1772	1.04601	-1.64933	0.139042		Mrpl19_1	0.297703	-0.156749
8430406I07Rik_1	-0.0333924	0.23239	2.02425	0.182247	0.5269	2.37993		Evl_1	0.950907	-0.818864
Rwdd3_2	0.0246141	-0.307202	1.17314	1.02445	-1.05429	0.829745		Mrpl54_2	-0.271341	0.370722
Yme1l1_1	-1.06487	-0.937392	0.0181641	2.17144	1.79354	2.77133		Vrk3_1	0.648637	-0.578795
Tpr_1	0.490022	0.886546	0.359627	1.80417	1.16496	2.56754		Chrnb1_2	0.202929	-0.137468
Spata24_1	-0.00665862	0.307707	1.46459	0.696512	1.88232	0.877465		Ikbkg_1	-0.0201455	0.0757986
Rpp38_2	-0.213738	-0.819708	1.98237	0.167597	0.949396	0.171487		Jun_2	0.120831	-0.0835504
Slc7a1_1	0.0226279	-0.192431	1.54009	0.575991	-1.13104	-1.67386		Mrpl14_2	-0.0262472	0.041367
Spata24_2	-0.0847139	-0.0141349	1.18875	0.900497	0.251642	2.38994		Mrpl21_1	0.307164	-0.293124
Slmap_1	-0.0172773	0.179286	1.25303	0.818884	0.236725	0.484958		Iars2_2	0.00573013	0.00199963
Hist3h2ba_2	-0.54396	-1.04442	0.864307	1.1954	-0.0996309	0.821435		Pkn2_1	0	0
Ccz1_2	-0.106456	-0.00547479	1.44762	0.607564	0.0316895	-0.383616		Smad1_1	0	0
Mrpl14_1	-0.049961	-1.09521	2.00917	0.0193614	1.05641	1.8669		Smad1_2	0	0
Mzt2_2	-0.312401	-0.274586	0.700175	1.30791	0.947872	1.99296		Ap4b1_1	0	0
Ndufb3_1	0.0230284	0.512672	0.0962652	1.9111	1.04856	1.07359		Aip_2	0	0
Mctp1_2	-0.235348	-0.21492	0.26031	1.70121	2.11742	1.84343		Rad52_2	0	0
Pcdhb22_1	-0.386935	-0.0479637	0.365782	1.54575	-1.20994	1.02031		Ciz1_2	0.483419	-0.486887
Athl1_1	-0.182438	-0.8478	1.68137	0.208405	1.46935	2.53319		Slc35a3_1	-0.00356358	-0.0111144
Polm_1	-0.0241951	0.46678	0.874295	1.00297	-0.977647	1.87066		Ppfia3_2	0.172725	-0.194371
Ccbl2_2	-0.238219	0.458684	0.890904	0.970842	0.566765	0.883479		Asb8_1	-0.285772	0.261629
Rasgrf2_2	-0.0207791	-0.159133	0.930564	0.926839	-0.612262	2.1358		Olfr1156_1	-0.0613836	0.0334885
Nsun4_2	0.0367228	0.994369	0.704856	1.12387	0.438445	1.16255		Gsdmc_1	0.127398	-0.159721
Cnot2_2	-2.23367	-1.76834	1.54822	0.233894	0.722157	3.37549		Fgfrl1_2	0.485377	-0.533166
Pak2_1	0.679126	0.427988	1.11302	0.634569	0.61179	0.343579		Fam20b_1	-0.0200478	-0.0303712
Ift52_1	0.335491	0.161689	0.857933	0.880677	0.826573	0.463185		Katnb1_1	-0.0486576	-0.00739052
Tab1_1	-0.0838847	0.228993	1.10473	0.63197	-0.281115	-0.400547		Qrich1_2	-0.000934255	-0.0600944
Anapc5_1	0.242762	0.770301	1.03082	0.694157	0.613561	1.07623		Setd1b_2	0.174301	-0.239922
Adi1_2	0.838068	0.787967	0.813169	0.899242	0.4906	1.14263		Mrpl20_1	-0.131979	0.0536412
Crk_2	-1.47759	-1.65519	0.978854	0.730744	2.10904	4.40901		Sypl_1	-0.150937	0.0552576
Katnb1_1	0.643227	0.501982	0.0659436	1.63762	0.311175	1.27003		Magee1_1	-0.440213	0.342349
Sipa1l1_2	-0.94807	-0.0114124	1.02598	0.673239	-1.23949	0.709458		Ccbl2_2	-0.0335693	-0.06431
Gspt2_1	0.739301	0.665517	0.438211	1.23873	1.62756	2.10663		Letm1_1	0.178204	-0.281901
Gabarapl2_2	0.256806	0.927636	0.64569	0.994414	0.618167	0.759509		Wrb_1	0.884483	-0.991804
Cyth2_2	1.13632	1.32605	1.95456	-0.322227	1.44622	3.16054		Ccz1_1	-0.206799	0.0872087
Psme3_1	0.180453	1.03815	0.676694	0.945759	-0.338787	2.77766		Sipa1l1_2	0.349212	-0.489219
Slx1b_1	1.24428	0.859183	0.762629	0.851682	2.45249	3.72978		Gpatch1_2	-0.442125	0.274686
Clybl_2	0.0499725	-0.182728	0.0273069	1.57869	0.800913	1.61668		Jun_1	0.20255	-0.381757
Cln8_1	0.977105	0.648894	1.1482	0.455509	1.54811	2.36702		Zfp810_2	-0.225182	0.015892
Jun_1	-0.385811	-0.236325	1.80561	-0.209775	-0.55733	-0.440938		Ciz1_1	0.18011	-0.415149
Iars2_2	0.0506202	-0.766459	0.887055	0.685531	0.427611	0.83503		Tubb5_1	-0.295096	0.0579949
Lemd2_1	-0.0339638	-0.423472	0.555992	0.995585	0.530553	2.33123		Ly6c1_1	0.208655	-0.458919
Wasl_1	0.896267	-0.190439	0.832381	0.702292	1.72975	1.62697		Nln_2	0.120064	-0.394226
Zfp810_2	1.10105	0.826422	0.855002	0.650038	0.922398	0.367049		Fam36a_2	0.0371143	-0.346791
Scin_1	1.06229	1.00977	1.74411	-0.267746	1.70917	2.2679		Stk36_2	0.598139	-0.908193
Setbp1_1	0.52285	0.471443	0.90461	0.503874	0.730339	1.37461		Cd55_2	-0.0335196	-0.277969
Stk36_1	-0.229931	0.178785	0.273092	1.11544	1.70987	1.43101		Gtf2b_1	-0.249885	-0.0634754
Ivl_2	-0.550546	-0.277987	0.931628	0.448318	-0.530163	0.548484		Spata24_2	-0.448565	0.125948
Ppp5c_1	-0.302535	-0.367184	-1.00393	2.36468	-0.00781614	1.24866		Gtf2h3_2	-0.43872	0.0588034
Eif2ak2_2	0.494993	1.32482	0.605137	0.736942	0.673203	1.47424		Mxd1_1	-0.359739	-0.0249153
Eif2ak2_1	-0.422622	0.0584521	1.42524	-0.0972254	0.609524	1.7943		Ppp5c_1	-0.372765	-0.035702
Chrnb1_1	0.43136	0.686819	1.10872	0.212936	0.901616	1.35855		Slc20a2_1	-0.116148	-0.292499
Cnot2_1	-1.51829	-0.794351	0.187583	1.10598	-0.720328	0.284893		Ift52_2	-0.450359	0.03423
Tcea3_1	0.290014	0.524823	1.00713	0.261764	-1.37552	3.41098		Gabarapl2_2	-0.122346	-0.300223
Plod2_1	-1.56982	-0.784919	0.419379	0.825738	1.15666	1.2361		Gpcpd1_1	-0.197466	-0.249604
Ipp_1	0.667851	0.226389	1.38593	-0.223923	2.47178	1.21367		Ivl_2	-0.228106	-0.242973
Xrn2_2	0.0455179	-0.0443373	0.498804	0.626446	1.09968	1.91433		Limk2_1	-0.185757	-0.291668
Klf6_1	0.470377	1.40923	1.70764	-0.619397	3.14261	2.15337		Nktr_1	-0.31892	-0.181134
Lass5_2	0.212247	0.121113	0.397555	0.64975	-0.0128563	0.501832		Pcdhb22_1	-0.149543	-0.360613
Nudt1_2	0.0580158	0.442049	1.128	-0.12185	1.92454	1.93322		Pak2_1	-0.286118	-0.29626
Mxd1_1	-0.627244	-0.41762	-0.0938451	1.05169	-0.156965	0.623695		Ccbl2_1	0.27608	-0.870203
Tcea3_2	-0.472606	1.92703	-0.212038	1.12205	1.32606	2.15347		Ankk1_1	-0.591366	-0.0149813
Abcb1a_1	-0.173802	-0.0204823	0.304482	0.604247	0.496427	0.191364		Hnrnpab_1	-0.53484	-0.0890434
Hdac1_1	-0.401392	-0.716767	0.379754	0.528678	-0.0418902	0.783289		Ppfia3_1	-0.77195	0.140366
2310033P09Rik_1	-0.894973	-1.14756	-0.17836	1.042	0.202099	1.72354		Ppp5c_2	-0.379214	-0.257368
Tspo_2	-1.1945	-1.54576	0.961527	-0.106961	-1.29569	0.129729		Nudt1_2	0.527543	-1.17968
Gtf2h3_2	-0.393406	0.157372	0.185946	0.641964	0.640667	1.9992		Slc22a18_1	0.512592	-1.165
Fbxo32_1	0.870564	0.481858	1.49371	-0.692663	1.33337	1.72848		Ppp3ca_2	-0.552186	-0.10184
Mrpl54_2	0.181967	-0.0856339	0.265727	0.525914	1.37991	0.406388		Gpatch1_1	-0.170705	-0.506188
Inha_1	-0.658784	-0.197339	0.358355	0.328303	-0.26535	-0.0621026		Csf2ra_1	-0.116491	-0.564182
Hnrnpab_1	0.241966	0.106627	0.418523	0.265464	1.7223	3.37982		2310033P09Rik_2	-0.521313	-0.160883
Ssx2ip_2	-0.180694	-0.277348	-1.30319	1.97453	1.51254	0.935067		Cryab_2	-0.0522213	-0.649938
Cry1_1	-0.292703	-0.00975851	0.828807	-0.207938	1.50059	1.01961		Abcb1a_1	-0.6463	-0.0586318
Olfr1156_1	-0.00702975	0.0845012	0.0277141	0.567529	0.424529	0.300542		Tab1_2	-0.42498	-0.292575
Mrpl21_1	-0.0131943	0.403302	0.125479	0.454662	1.61388	1.04818		Asb8_2	-0.00533439	-0.719377
Gtf2b_1	-0.245945	-0.112878	-0.429004	1.00801	0.514643	1.11526		Ssx2ip_2	-1.08187	0.351012
Rad52_1	0.029818	-0.527379	-0.05127	0.595067	1.08641	0.977096		Cldn6_1	-0.409123	-0.350366
Limk2_2	-0.700513	0.0471123	0.174505	0.356254	-0.71186	0.256017		Aox1_1	-0.123072	-0.654121
Plcb1_2	-0.0110466	-0.605274	0.185934	0.270545	0.764569	1.64722		Slc7a1_1	-0.434999	-0.357784
Slain2_1	0.169569	-0.293494	0.727537	-0.297853	0.650702	0.346246		Sppl3_2	-0.736518	-0.0633343
Gpatch1_1	0.247145	0.0563748	1.24301	-0.823042	1.36429	2.25229		Ddx3x_2	-0.309405	-0.492485
Mrpl52_2	-0.119083	0.636945	-1.09141	1.45804	0.52013	2.74726		Grhl3_2	-0.487214	-0.319584
Sipa1l1_1	0.0576381	0.201254	0.115694	0.196744	-1.86475	1.44858		Scin_1	-0.40941	-0.41734
Mrp63_1	0.0125346	-0.136199	-0.00200867	0.279882	0.074082	0.288071		Raf1_2	-0.0162536	-0.813917
Mbtd1_2	-0.70142	-0.856108	0.0813912	0.185259	-0.679617	1.49925		Atp13a5_1	-0.181184	-0.683194
Sypl_1	-1.217	-0.52666	-0.250303	0.462925	0.505571	2.18921		Hacl1_1	-0.825371	-0.0486564
Stk36_2	0.261058	0.49159	-0.651325	0.846218	1.10302	0.0614296		Mettl22_1	-0.213427	-0.663136
Fkbp8_1	0.250112	-0.0486407	-0.341209	0.478265	0.748706	1.64245		Ccz1_2	-0.124345	-0.785851
Ivl_1	-0.190235	-0.0619838	0.0684575	0.0574378	-0.223931	-0.0734509		Podxl2_1	-0.41637	-0.500713
Gabarapl2_1	0.0264309	-0.103925	0.538975	-0.448509	0.345804	0.783242		Lemd2_1	-0.186446	-0.749484
Nktr_1	-0.088744	-0.616453	-0.0796861	0.14648	0.0934615	1.14234		Tab1_1	-0.227316	-0.718012
Fam20b_1	0.036869	-0.500412	0.165321	-0.115076	0.373474	2.12762		Adi1_1	-0.669073	-0.290227
Aox1_1	-0.294032	0.170963	0.626151	-0.586131	0.820509	1.51122		Gfral_1	-0.578458	-0.414926
Cyth2_1	0.214708	0.638556	-0.0585311	0.0813438	0.131237	2.01114		Stac_1	-0.694215	-0.303389
Pkn2_1	0	0	0	0	0	0		Stk31_1	-0.77784	-0.267735
Smad1_1	0	0	0	0	0	0		Nob1_1	-0.683828	-0.393255
Smad1_2	0	0	0	0	0	0		Puf60_1	-0.614372	-0.488319
Ap4b1_1	0	0	0	0	0	0		Hist3h2ba_2	-0.824553	-0.305434
Aip_2	0	0	0	0	0	0		Plcb1_2	-0.385385	-0.783066
Rad52_2	0	0	0	0	0	0		Tnrc18_2	-0.445412	-0.723421
Adi1_1	-0.419826	-0.701613	0.139199	-0.161899	-0.419604	0.105605		Dnajb4_2	-0.328583	-0.852975
Slc20a2_1	0.208265	0.746463	0.891364	-0.945669	0.42972	-0.441135		Clybl_2	-1.10822	-0.077876
Nob1_1	-0.504424	0.0831348	-0.429739	0.293097	0.504147	0.784325		Gca_2	-0.211066	-0.995817
Ccz1_1	-0.597405	-1.61707	0.653405	-0.87977	-1.11553	0.59012		Mrp63_1	-0.864495	-0.352884
Podxl2_1	-0.72583	-0.0671516	-0.422342	0.161558	0.14365	-0.419518		Eif2ak2_2	-0.634972	-0.583659
Ankk1_1	0.557909	-0.0100876	0.363207	-0.624669	0.79075	1.72992		Sipa1l1_1	-0.6346	-0.592932
Ppp5c_2	-0.610475	-1.00799	-0.325223	0.0406131	0.816591	2.42417		Cyth2_1	-0.600561	-0.627569
Nudc_1	-0.953455	-0.266983	0.283354	-0.702203	-0.913897	1.10184		Nudc_1	-0.459173	-0.84992
Csf2ra_2	-1.23077	-0.906272	-0.258024	-0.174296	-0.448408	-0.469536		Fkbp8_1	-0.788016	-0.547468
Mxd1_2	-0.198858	-0.350165	-0.922081	0.463372	-0.317498	0.492946		Cd274_2	-0.714564	-0.652783
Nudt15_2	-0.385898	-0.850971	-1.08566	0.563715	-0.603515	1.5347		Chi3l3_1	-0.730361	-0.647363
Gsdmc_1	-0.0862338	-0.360438	-0.137487	-0.396754	0.355119	-0.515357		Ccdc82_1	-0.924791	-0.462325
Grhl3_2	-0.916924	-0.189348	0.361007	-0.913289	-0.351418	-0.0874985		Mxd1_2	-0.664973	-0.741719
Cul2_1	-0.0850609	0.255253	0.293814	-0.901729	0.725199	1.1863		Cul2_1	-0.506308	-0.904162
Car14_1	-1.9234	-1.18412	-0.0540518	-0.617801	-2.95184	-4.69386		Med1_1	-0.637088	-0.813725
Stac_1	-0.117464	-0.453136	-0.498953	-0.206017	0.322896	0.471464		Hdac1_1	-0.729943	-0.728272
Slc35a3_1	-0.327942	-0.494459	-0.27657	-0.444259	0.432326	0.136118		Eif2s1_1	-0.691659	-0.770646
Wnt7b_1	-1.019	-1.41965	0.773984	-1.52513	-0.378157	-1.75461		Mrpl52_2	-1.14451	-0.361844
Npas1_1	-0.386247	-0.844952	-0.00913091	-0.814452	-0.163	-0.286523		Mrps26_1	-0.821025	-0.702739
Atp13a5_1	0.0132744	-0.493777	-0.157687	-0.679492	-1.7288	-1.07612		Nsun4_2	-0.914202	-0.620963
Dnajb4_2	-1.30698	-1.74065	0.358098	-1.23392	-0.60813	0.89702		Cry1_1	-0.435386	-1.11864
Ikbkg_2	-0.179236	-0.279144	-0.815659	-0.109397	0.347208	1.12903		Tmod3_1	-0.892049	-0.678273
Gls2_1	-0.948811	-0.0331216	-0.717468	-0.225571	-1.05067	-0.341686		Csf2ra_2	-0.834575	-0.804656
Gfral_1	-0.143756	-0.261105	-0.507841	-0.483326	0.500648	0.753593		Nudt15_2	-0.675185	-1.04674
Tmod3_1	-0.407122	-0.604657	-0.494041	-0.534313	-0.327491	-0.420429		Olfr972_1	-0.797044	-1.01153
Tssc1_1	-0.284997	-0.265485	-0.746978	-0.428649	-0.539725	-1.70649		Npas1_1	-0.770106	-1.11763
Cd274_2	-0.774063	-1.2977	-0.740172	-0.442421	-0.984487	0.129159		Fmo9_1	-1.23124	-0.721311
Puf60_1	-0.101982	-0.075907	-1.17717	-0.166855	-0.449098	-2.23166		Rasgrf2_1	-0.641114	-1.36543
Gpcpd1_1	-0.795795	-0.30802	-0.719558	-0.644152	0.720603	0.512582		Pet2_1	-1.56646	-0.454595
Ddx3x_2	-1.26774	-0.927432	-0.779092	-0.607836	-0.0183691	0.658005		Ivl_1	-1.09635	-1.01752
Fmo9_1	-0.92384	-0.396728	-0.980729	-0.436591	0.118133	-0.0688263		Pnpla7_1	-1.14562	-0.98016
Rab1_1	-0.534699	-0.0672789	-0.399933	-1.22095	-0.977793	-0.526101		Lass5_2	-0.797921	-1.34717
Stk31_1	-0.137628	-0.323205	-1.53705	-0.237868	0.802776	0.71885		Wnt7b_1	-1.09005	-1.0873
Ccdc82_1	-0.182685	-0.283759	-1.12636	-0.765801	-0.397833	-0.0724123		Inha_1	-1.16332	-1.04685
Eif2s1_1	-0.243917	-0.197314	-2.26357	0.352688	0.421918	0.478376		Limk2_2	-0.733084	-1.56003
Pet2_1	-0.249449	0.299183	-2.02841	-0.0228239	-0.233444	0.422497		Ikbkg_2	-1.75634	-0.763697
Hacl1_1	-0.354506	0.0430156	-1.43991	-0.660615	0.258274	0.583699		Car14_1	-0.905325	-1.88816
Pnpla7_1	-0.278058	-0.0685586	-1.04911	-1.08326	-0.124124	0.379499		Tssc1_1	-1.68847	-1.35315
Med1_1	-0.713352	-0.596607	-0.674341	-1.79163	1.73513	0.940138		Rab1_1	-1.73197	-1.36351
Chi3l3_1	-0.751891	-0.916772	-0.927132	-1.8525	-1.23505	-0.534902		Slc22a18_2	-0.91695	-2.18939
Slc22a18_2	-1.13174	-1.5173	-0.91695	-2.18939	-1.21928	-0.250315		Gls2_1	-1.74838	-1.40702
Nf2_1	-1.12496	-1.07338	-2.39583	-0.826678	-3.41207	-2.5471		Tspo_2	-1.58038	-1.69545
Olfr972_1	-0.655154	-0.721525	-1.48878	-1.90747	-0.382977	0.0387036		Alyref_1	-1.60452	-1.79559
Alyref_1	-1.07066	-1.29691	-1.6095	-2.38584	-0.921578	0.0558692		Nf2_1	-2.86623	-2.31894
Tsc2_1	-2.78294	-3.6214	-4.43951	-3.84366	-4.06178	-4.97359		Ccnc_1	-2.45557	-2.96491
Rb1_1	-2.38441	-2.43302	-4.63223	-4.42832	-4.16552	-3.21885		Tsc2_1	-2.42044	-3.70068
Ccnc_1	-4.80342	-5.14111	-5.16342	-5.13975	-3.18642	-2.18322		Rb1_1	-4.09342	-3.14111
Cdkn2b_1	-3.64236	-5.03377	-5.49341	-6.44764	-3.86604	-5.40653		Cdkn2b_1	-4.14061	-4.68697
