# Supplementary material for: Altered Mitochondria Functionality Defines a Metastatic Cell State in Lung Cancer and Creates an Exploitable Vulnerability
Source: Oxford University Press journal article supplement (doi:10.1158/0008-5472.can-20-1865), 2020-11-25
Supplement: 00085472can201865-sup-244539_2_supp_6715454_qjmwr8.xlsx [file 00085472can201865-sup-244539_2_supp_6715454_qjmwr8.xlsx]

## Sheet: Table S3
Table S3: Drop off Screen (hairpin drop in metastasis) analysis by Weighted Sum (WS) algorithm
Gene	Hairpins	# Hairpins	Hairpin ranks	NES	Gene rank	p-value	p-value rank	# Hairpins 500	# Hairpins 1000	# Hairpins 5000	# Hairpins 10000
Klf5	CGTATCCACTTCTGCGATTAT, GCAGTAATGGACACCCTTAAT, GCCGCTACAATTGCTTCCAAA, GCGATTCACAACCCAAATTTA, TCCGATAATTTCAGAGCATAA	5	12157, 68, 85375, 15, 18514	0.00124	1	0.0001	1	2	2	2	2
Krtap3-3	CCAGAGTCTTTGGTAATGCAA, GAAGTTGGAGTTGAGTGATAT, GAGTCTTTGGTAATGCAACAT, GTCTTTGGTAATGCAACATTT	4	59875, 30366, 465, 101	0.007227	2	0.0002	2	2	2	2	2
Olfr1418	CCTTTCTGTAGCAGTAAGGAA, GATCTTCTATTCTTCTACCAT, GCACAAGTCTCATCTACTTGT, GCAGTATGGATGCACAAGTCT, GCCTGGAGATCTTCTATTCTT	5	90905, 39332, 137, 433, 37730	0.008133	3	0.0002	5	2	2	2	2
Mdp1	ACTCAAGGATTAGAGACATTT, ATACTTTATTCAGCGGGAAAT, CTTTGAGAGGTTGCACCACAA, GCTGTGAGTTACCATGTGGTT, GTCTTCTTTGATGATGAGAAT, TCAAACGTTAACTCAAGGATT, TGCCACCGTATGGGTTGTTTC	7	2374, 7872, 168, 358, 59592, 44612, 40813	0.00917	4	0.0003	6	2	2	3	4
Otud5	AGAAGACTTCACCACCTATAT, ATCCTAACAAGGCCACTATTG, CCACATTGAAATGCAGGCTAT, CCGTCATTTAAGCCAGGGTTT, CCTTCCTTAAAGATCAGATAA, CGCTGATTACTTCTCCAACTA, GATGCCACCCAAACTTCTTTG, GCACAGAACCTATCAACACAT, TGTCAGCTACCACCGGAATAT	9	39294, 5968, 47111, 326, 278, 253, 10094, 51463, 67466	0.009883	5	0.0007	10	3	3	3	4
Spata24	GAAAGAGAAGATGGCCTTTGA, GAAATAGAGAAGAAACTGGTG, GCAGCTGGAGAAAGAGAAGAT, GCCAAGGAAGAAGAGAAGTTA	4	134, 53883, 671, 9368	0.01037	6	0.0002	4	1	2	2	3
Olfr338	CATCTCATATGCTGGGTGTAT, CCGCATTGGAGTAACCATTAT, CTATCTCACTTCAGAAACAAT, CTGGGCCTTATCTTCTGCAAA	4	690, 150, 45608, 66435	0.01072	7	0.0002	3	1	2	2	2
Vmn1r95	CCAGTCTTGACTGGTTCTAAA, CCATAATTTCTCTCCAGTCTT, CCTCACTATATTTCCAAACAA, CTTGACTCTATTCCTCACTAT, GACAATAACACTGACTCTAAA, GCCTTGACTCTATTCCTCACT, GCTCTTCAGATCCTCTTGCTT, GTCACTCTTGTTCCTGTTAAT, GTCCTGAGTATCCATCAGTTT, GTGGTCACATTTGTTAGCTTT, GTTCCTGTTAATAGAGGTAAA, GTTCTGTTCCACTTCTGGATT, GTTGATCTTCAGAGATCCTAA, TCCACAGATAACAGACAATAA	14	91485, 37995, 51397, 76652, 165, 71230, 41055, 218, 36484, 41638, 6224, 32142, 10089, 8262	0.01084	8	0.0009	16	2	2	2	4
Gspt2	ATGTTCAGATAGTGATCATTG, ATTGGAGCAGTGAGCGATATG, CAGGACTGACTGGAGCAAATA, CCTAAGAAAGAACACGTAAAT, CGGATTACCATTTATTCCGTA, GAAGAATCTTGGGAGCTTAAA, GCACCTGTAGAACCTTCCAAA, GCAGAGAAATTTCACAGCAAA, GCCTTAGATACAAACCAGGAA, GGTACACCGGATTACCATTTA, GGTGCCTCTCAAGCCGATTTA, TACTTTGTGAACCCAGTAATC, TTGATGCCTCTGCACCATAAT	13	2655, 66429, 69372, 32201, 52946, 21489, 60866, 29826, 87, 348, 39548, 47240, 15583	0.01391	9	0.0016	31	2	2	3	3
Dnajb4	CCTCCCATTATTCATGAACTT, GAGGTCGAGATTCTGAAGAAA, GCATGGTTGTAATGTTCGTAA, GCCAACAATGGACGGAAGAAA, GCGATGAAACACCAAATAGTA	5	81899, 6247, 33456, 725, 687	0.01621	10	0.0007	12	0	2	2	3
Slamf7	CCCTTGATGGATCTGTGACAT, GCCCAGAACATAAAGCATCTA, GCGTTACATCACAAAGTAGTA, GCTCATCCTATTTGCTGTCTT, TGTGACATTCACTCTGAATAT	5	4131, 29200, 914, 87709, 121	0.01621	11	0.0007	11	1	2	3	3
Ciz1	ACAGCCTATGGTGAGGATTTC, ATGGGCTATGTCTGTCAAATC, CAAATCTGCAGCAGTTCTTTC, CCAATCGCAAGGATTCTTCTT, CCCAATCGCAAGGATTCTTCT, CCTCGGGACATCCTGGAGAAA, GAGCCCTTTGAGACATTGGAA, GCAACTCAGAATTGCGGCTTT, GTAACCTCCGTGCTTTCAATG	9	89052, 21145, 50581, 488, 340, 48641, 75328, 19290, 57538	0.0164	12	0.0011	20	2	2	2	2
Slc7a1	CCCGGACATATTTGCTGTGAT, CCGGACATATTTGCTGTGATT, CCTCACAATCTCTCCACTCAT, CCTCCAAATTCTCAGGGCTAA, GCTGATAGGTTTCACCATCTA	5	82820, 9609, 821, 77057, 498	0.01677	13	0.0007	9	1	2	2	3
Pld1	CAGTGGTCACCCTGATATAAG, CCCAATGATGAAGTACACAAT, CCCATCTCAAAGATTGTTGAT, GCTCGAAACGCTACCATATAT, GCTCTCCATGAGAACACGTTA, GCTGCCTACATCCATGTAATA, GCTTGGTAATAAGTGGATAAA, TATGGACTTCGGATCGATAAT	8	67703, 81623, 48974, 18377, 70149, 323, 22788, 575	0.01686	14	0.0012	22	1	2	2	2
1700009J07Rik	CAATGACCACAGGAACAAGGT, CAATGACCACAGGACCATAGT, CACAGGATCTCACTTGGCAAT, GATCTCACTTGGCAATGACCA, GATGACTACAGGACCACAGTT	5	484, 75565, 50747, 835, 39471	0.01693	15	0.0008	13	1	2	2	2
Upb1	CAATGATTTCTGGACTTTCAA, GAGGGTAGAATAGGCACTTAA, GATCAATGATTTCTGGACTTT, GCAGGATTGCAGTGAACATTT, GTGGAGTCAATATCATCTGTT	5	930, 45343, 9201, 425, 42767	0.01821	16	0.0009	14	1	2	2	3
Tpr	AGCGTGACATGTACCGAATTT, CACGGAACCAGCAACTAATAA, CCCACTAATAAGGCTCCAGAA, CCGACTACTTCATGATCAAAT, CCGCAGATTGAGCCTACAAAT, CGCAGGTACAAGACTCAGTTT, GAGTTACCCAGGGAGATTATA, GCTCACATAAAGCTCTCTAAT, GCTGACTAATCTACAGACAAT, GGCGGAGTCTGAAGGTATTAG	10	79825, 74373, 596, 61640, 6180, 72168, 61930, 1993, 111, 50632	0.01839	17	0.0026	49	1	2	3	4
St8sia4	CCACCAGATTCTGTGATGAAA, CCTGAAGTTTCACCAATGAAA, GCCTGAAGTTTCACCAATGAA, GCTGACTAACAAAGTTCCTAT	4	82358, 1053, 667, 91133	0.01848	18	0.0003	7	0	1	2	2
Npas1	CGTGCGTCTTAGCGTCACCTA, GAGCAGAGTTAGCGACCATAT, GCAATGCTGAAGGTAGTCAAA, GCACGGACACATGATTGTCTT, GTGTTCGCTTTGAACCAGGAA	5	76328, 48717, 224, 28281, 1050	0.01911	19	0.0011	19	1	1	2	2
Ppfia3	CCTGAAGGAATTTGCTACGAA, CCTGGACCAAACCATAAGAAA, CGGTTACAGCTTCACCTCAAA, CTATGGTATTATGTGCCTGAA, GCTAACATGAAGAAACTTCAA	5	58225, 85711, 1059, 26231, 329	0.01986	20	0.0011	21	1	1	2	2
Zfp114	CCAGAAGCTGTCATCAGCATT, CCCAGAGCACAGGGCTTAGTA, CCCATTCAACAAAGTGTTCAT, CGGCATCTGCTGTAAGGGCTT	4	508, 1219, 31402, 48667	0.02012	21	0.0004	8	0	1	2	2
Ick	CACAACCACGAGGCGGTGTAA, CCAGCTCATTAAAGAAAGAAA, CCAGTGAAATTGACACAATTT, CCCAATAACTTAAAGACTCTA, GCCAAGGCATATACGCTGATT, GCTAGTCAGGCTCTTCGATAT, GGAATATAATGTACCAGATAT, TAATCATGCCAATATCGTAAA, TCGGGAGGTTAAGTCTTTAAA	9	47882, 67469, 46478, 58612, 57421, 59967, 643, 374, 64732	0.02094	22	0.0019	39	1	2	2	2
Baiap2l1	CCAACCTCATTGACAGGCATT, CCGGAATGTGATGGAACAATT, GAGCACAAAGAAATTGAGTAT, GCACTCAAATACGAGCACAAA, GCCAGTCACATACACTACTAT	5	12942, 1031, 10365, 67166, 815	0.02213	23	0.0013	23	0	1	2	2
Mzt2	AGAACGTGGAAGCCGTGAAAG, CATTCTTGGCAATGTGACCAT, CCATATCTCTGTCTACATCCA, CGATGTGTTCAAGATCCTGGT, GCCCATATCTCTGTCTACATC, TCTTGGCAATGTGACCATATC	6	2934, 82919, 1047, 11928, 283, 71624	0.02214	24	0.0018	37	1	1	3	3
Ndrg3	CAGGCCAATTTGGACCTCATT, CCACAGCATCTCTCTCTAGTA, CCATGCCATTACTGTAACATT, CGACCCTATAAATACAACTTT, GCTCAACCATAAGTCCTGCTT	5	69366, 467, 1158, 78641, 77907	0.02232	25	0.0013	24	1	1	2	2
Olfr1044	CCTCTACTCTATATGGTCCTA, CTCTGCTACTGTCACTCCAAT, CTTGGGAATTTCTTGTACAAA, GACTGATCCTAGTCATTAGAA, GTTCTAATCACTCTCTAGATA	5	60512, 5157, 79608, 1225, 294	0.02248	26	0.0014	27	1	1	2	3
Mrpl10	CCTCAAATTCTCAAAGTAGAA, CGTCAAGATATAGTAGCAGTT, GATGGCTATAACTGAGTATAT, GCGGAAACACAAGATCTTCAT	4	1450, 37591, 4745, 317	0.02255	27	0.0009	17	1	1	3	3
Tspo	ACTACTATGTATGGCGTGATA, CCGTGCTCAACTACTATGTAT, GTGGTATGCTAGCTTGCAGAA, TGGCTCCTACATAGTCTGGAA	4	1386, 79543, 82074, 526	0.02263	28	0.0009	15	0	1	2	2
Eif4a1	CCTAGTCACCTCGTTCCTAAA, CGAGAGTAACTGGAACGAGAT, GATCTATGACATATTCCAGAA, GCCTCATTTGCTGGACCAAAT, GCGAGCTATTCTTCCTTGTAT, GCTATTAACATGGTGACCGAA, TCTCCTTAGTCATCAACTATG	7	81406, 7995, 826, 43147, 593, 73922, 35914	0.02267	29	0.0021	41	0	2	2	3
Smug1	CAATCTGTGTCCTCTACTCTT, CCTCTCTTCCTACACTTCATT, GCACTGCTTTGTCCACAATCT, GCTTATGAACAACCTCTCTAA	4	1334, 41468, 40361, 720	0.02281	30	0.001	18	0	1	2	2
BC051628	CCGTACCTACAAGTTCACTAT, GAGCACGAAGATGCCAGTTAT, GATGATACTTTGGGCCTGTTT, GCTCAAGAAGTGCTCCTACTA, GTGCTCCTACTACATTGAGAT	5	86599, 24355, 12614, 1243, 312	0.02289	31	0.0014	28	1	1	2	2
Crk	CATCCTGAGAATCCGGGATAA, CGAATAGGAGATCAAGAATTT, CGCCTCAGTATCGGCTCTGAT, CTGGATCAACAGAATCCCGAT, GCCTGCTTTACTGGAATTCTA, GCTGGTAAAGGTTACGAAGAT	6	63129, 14127, 1190, 20410, 40211, 97	0.02371	32	0.0018	36	1	1	2	2
Usp26	CCTGACCACATCAGTCTTATA, CGCAAGATTTAGACAGAAGTT, CGTGATCTTAATGATCTCATT, GCACATATAGTTGGGTCAGAA, GCACTGGAAAGATTAAGACTT	5	1160, 729, 28335, 57755, 51580	0.02384	33	0.0014	25	0	1	2	2
Parvg	CCAGTCTGTCTACTAAGGCTA, CCCTGTCAACCCTGAAGATAT, GAGCACACTGAGGATACTTTA, GCAGGCCACTCATAAGTGTTA	4	1531, 68266, 372, 10026	0.02399	34	0.0014	26	1	1	2	2
Cyp7a1	CACTTGTTCAAGACCGCACAT, CCAAAGTTACTCTTCCCGTTT, CTGTCATACCACAAAGTCTTA, GCAACCTTCTGGAGCTTATTT	4	32778, 75568, 1194, 1278	0.02429	35	0.0015	29	0	0	2	2
Tnrc18	GAAATACATGGCCGGTCTCAA, GACGAAGACTTCCTGAAGAAT, GCACCATGAAACCTGAACCTA, GCGTGAACTGAACTCCAATAA	4	81364, 9326, 1078, 1346	0.02472	36	0.0015	30	0	0	2	3
Gpatch1	CCAGAGTGAAGAGGGATAAAT, CCAGGAGAACACCTGAATCTT, CCCAGAGTGAAGAGGGATAAA, CCTCCATGATGCACATCCATT, GCTCACGTACTTCAGGTGTTA	5	18029, 1214, 734, 35663, 13477	0.02478	37	0.0017	33	0	1	2	2
Plcl1	CCAGAGGACTTCGTGAATTAT, CCCTACTCTGAAGGAATCTAA, CCTTACGAGAAGCCATAGATA, CCTTTGTAATAGGAACAACAT, CGCTTGGAATATTACGGTATT	5	57389, 52334, 1313, 478, 84302	0.02502	38	0.0017	32	1	1	2	2
Mrpl14	CCATCGCTCAGAACTTTGTGT, GCAGAAGAAGAAAGCACTCAT, GCATCCACGTCTATAACAAGA, GTGCATCCACGTCTATAACAA, GTTTGACTCCAACAACGTGGT	5	260, 64574, 67059, 42672, 1402	0.02529	39	0.0017	34	1	1	2	2
Cry1	ACATCAGTGTTTGATCTAATT, CAGCCACCTCTAACATATAAA, GCAAGCAGACTGAATATTGAA, GCCAAGTGTTTGATAGGAGTT, GCTCTCAAGGAAGTGGTATTT	5	998, 77998, 25659, 59855, 1189	0.02585	40	0.0017	35	0	1	2	2
Olfr901	CATTCATGTATCTTAAGCCTT, CATTTCTCATGCTGAGTGCAT, CGCACATAATAGCTGTTTCTA, GATAGGACCTACATTGATCAT, GCTGCCTTTCTTCTTCCTGTT, GCTTGATTGTTCTGATTGTTT	6	10400, 10141, 1010, 975, 84583, 63087	0.0259	41	0.0021	43	0	1	2	2
Klf6	ACAGGGAATCTTCTCAACTAT, GATCCCATTGGTGAAGTCTTA, GCCTCTCTTTGGAAGGTCTTT, TGAGTTGACCACCAATCATTT, TGATGAGTTGACCAGACACTT, TGGTTGTGTTGAGGATCTATT	6	84922, 16519, 86534, 1242, 289, 65134	0.02597	42	0.0021	42	1	1	2	2
Gja10	CCTTTATAGACTCAGGGACTT, CGTCCATCATCTGCGTTAGAA, GAGTCAATATACCACGGTCTA, GCGCACCTATGTCTTACACAT, GCTCACGGTCTCTGAATAGTT	5	88227, 39162, 824, 64066, 1279	0.0264	43	0.0018	38	0	1	2	2
Cldn6	CAGACATTACATGGCCTGCTA, CCACTCTATCATCCAGGACTT, GCAAGGTGTATGACTCACTGT, GCACTACCTGTGTGGAAGATA, GCTGCTGGCATTTCTCACTTT	5	12392, 1229, 53527, 1179, 25736	0.02756	44	0.0021	40	0	0	2	2
Fads6	CCATTATACACTCACCGTCAA, CGCTACGTTTACATGTTCCTT, GCCAAATTCAACCACGTGAAT, GCCTTACAATGAAGACTCATA, GTCGAAGTTTCTCCACGAGAA	5	739, 85529, 8224, 55327, 1397	0.02792	45	0.0022	45	0	1	2	3
Katnb1	AGCAAGCCTCAGAGGGTAAAG, AGGATGCCATGTCGCAGATAC, AGGCTGTGTCTTCCGATATAG, AGTCAACCTGTGGTCCATAAA, CCAATGAATATCTCCTAGCTT, CCAGAGTAATGTCTCCTCTTA, GCAGAGCAAGTATGAGAGCTA, GCGGAGGACTACAATGAGATT, GCTGTAAATTATCAGGCAGAT, TGTAAATTATCAGGCAGATTT	10	32221, 25996, 19284, 89590, 10628, 295, 20067, 87961, 42340, 880	0.02843	46	0.0052	95	1	2	2	2
Nln	CGCGAGCGAATACGCTAAATA, GACGACTTCATTGACAGTTTA, GCACGATTTAGTGGAACAAAT, GCCAGTATTATGGATATCTTT, GCGAACTTACTTCCATGAGTT	5	74613, 65955, 407, 35023, 1539	0.02845	47	0.0023	46	1	1	2	2
Tead1	CAGAAGGAAATCTCGTGATTT, CCATTCTTACAGTGACCCGTT, CGCTCGCCAATGTGTGAATAT, CTGTGGACATTCGTCAGATAT, GCTCGCCAATGTGTGAATATA, GCTTGGTTGAACTATCCTAAT, GGCGTCTGGAGTCCTGATATT, GTGTATTTGAAGTCTCGAATA, TCAAATTCTGGGCGGACTTAA	9	22715, 75487, 37128, 61524, 26978, 974, 50735, 220, 13202	0.02857	48	0.0031	64	1	2	2	2
Nudt15	GAGAAGGAGAATTACCATTAT, GAGCAAGGTTATGACCCATTT, GAGGTGGATATGACTCATGAT, GTTGAGAAGGAGAATTACCAT	4	1234, 1580, 7897, 69615	0.02886	49	0.0022	44	0	0	2	3
Slc12a9	CCACGGTTCTGTCCATGTTTA, CCATCATTGCAGTCGCCTATA, CCTTTGTGGATCTCACCCTAT, GCCCTGCTTCAAGAAGACTAT, GCCCTTTGGATGATGTGTTAA	5	1475, 5307, 90221, 65638, 758	0.02935	50	0.0028	50	0	1	2	3
Vps11	CCAGCAGTATAGATTCTTCTA, CCCACTTGTTTGTCGTGACAA, CCTGTCTATCATCCGAGATTA, GCCAACTGTTGTGTCTTGTTT, GCTGAGAATCATGCACATCAT	5	11190, 54368, 51286, 1666, 197	0.02942	51	0.0029	52	1	1	2	2
Atpaf1	CCCACTTCTATGACTTCATAA, CCCAGAACCAAGATAAGACTT, CGCAGTTATTCCTAAAGAGAA, GCAGAAATGGACTCCACATTT, GCTCCACTTCACTGCACTTAT	5	1546, 88756, 9882, 2067, 568	0.02948	52	0.0029	51	0	1	3	4
Idi2	CCAGATTTCCATAAAGGACAT, GACAAGCAGGATCAGATCATT, GAGCCTTCAGTGTGGTCCTTT, GCAGATGCCAAGTACACATTT, GCCTCCTAGAACTGTGACAAA	5	29911, 1706, 51828, 130, 20407	0.02972	53	0.003	58	1	1	2	2
Atp5h	CCAGATGACCATTGATGACTT, CCCTTTGACCAGATGACCATT, GAAGTATAATGCCCTGAAGAT, GTGCTGAGTTTGTGTCTGGAT, GTTGGCTAGTCTGTCTGAGAA	5	915, 1466, 91764, 17842, 22971	0.03009	54	0.003	57	0	1	2	2
Nsun4	GACACCTATGATAGGGTGTTA, GCCCATAGTTTAAGCTGTAAA, GCGGAGATATCGATATAAGAA, GCTGGTAATACCAAACCTCAT, GTCACGTTGTCTATTCAACTT	5	4227, 42153, 900, 1501, 12082	0.0306	55	0.003	60	0	1	3	3
Zfp36l2	CCAAACACTTAGGTCTCAGAT, CGCATGAAGAAACCATGCAAT, GCACCACAACTCAATATGAAA, GCTGAAATGTTGGTGGTACAT	4	1710, 17509, 1274, 18630	0.03094	56	0.0025	48	0	0	2	2
Cyth2	ACCACATGGTGTACCGAATCT, AGAAGAGCTAAGTGAAGCTAT, AGAGCTAAGTGAAGCTATGAG, AGCTTTACATTCCCAACAATA, ATCCGGAACGAGCCCTTCAAA, CAGAACACGCCTGAGGAAATT, CCTGACTCCTTATTTGTAATT, GAGAAAGATGAGTGGATCAAA, GAGCTTTACATTCCCAACAAT, GCAGCAAGAAAGAAGCGAATT, GTTGTCCTTTGCCGTGATCAT, TTGCCCAGAGATACTGCTTAT	12	120, 82943, 24202, 862, 53806, 91869, 91353, 23545, 16536, 47838, 54054, 75469	0.03109	57	0.0043	78	1	2	2	2
Rai1	ACCATCTCGTGCTCCTATAAA, AGCCTGAAATCCGACTCAAAT, ATAAGAGGCTGCCGTTGTAAT, CGAGATGCTTACACCACCATA, CTCGCCAAGTACCAACACTAT, GCCAAGTACCAACACTATGGA, TCCCTACCTCCTCCACTTATG, TGAGGCCTAGGTTGCGAAGAA	8	549, 4839, 54810, 41541, 68728, 1102, 29135, 47272	0.03174	58	0.0047	89	0	1	3	3
9130401M01Rik	ACAGAATGTAGTGACGATATT, ACAGTTACCATCTACTAATTT, CAGTCTCAGCAAACATCATTC, GAACAGTTACCATCTACTAAT, GACAGAATGTAGTGACGATAT, GACGACAGGAATACGAGAAAG, GACTTCAACTTTAGGGAAGAT, GCTCAAATAAAGAGGATTCTT, TTGCGTCCTCCAAAGAGTTTG	9	51265, 209, 59444, 13481, 81797, 1096, 19836, 51324, 79257	0.03179	59	0.0047	88	1	1	2	2
Ces4a	CCACAATAGCACGAAGGTCAT, CCGGACAGTGTAACACTATTT, GACTGGAAGATGTTCCGAAAT, GCAGAGTTCGAGTGGAACTTA, GCGTATGATGAACCAAACCAA	5	13751, 45967, 39483, 657, 1660	0.03193	60	0.003	56	0	1	2	2
Top3a	CCTGTCTCAACCTCTGGTTAA, CGAGTTCATTGTTCGCCATTT, GCAGTCAGCATGTAAGCAGAA, GCCAGAATGTTACTATGATAA, GCTTTGAGATTATCCACGTAT	5	71637, 63948, 1227, 1471, 32252	0.03194	61	0.003	53	0	0	2	2
Magee1	CCATCATAATGGAGGGATGTA, CGTAGCAGAATTGTTGCAGTT, CGTGATTACCTGTCGGTATTT, GCATTGTCTGAAAGAGAACAT, GCTAGATGCTTCTGGCTCAAA	5	17295, 90181, 55435, 1720, 494	0.03202	62	0.003	59	1	1	2	2
Xrn2	CAACGATACTACAAGAACAAA, CCAAATGATGTGGAGTTTGAT, CCAGAGGATAACGTCAGGTTA, CCATTCCATTATGCACCATTT, GAACCTAACTTCACCATAATC, GAGATGTGTATGGCATAATAC, GCTATTACATAGCTGATCGTT, TACATAGCTGATCGTTTAAAT	8	1054, 744, 81559, 41304, 88178, 31509, 11265, 34553	0.03216	63	0.0049	91	0	1	2	2
Rhag	CCACCTGATGAATACTGCTAT, CCCTTATTCCAAGATGTGCAT, GCCACCTGATGAATACTGCTA, GCCTGGTCTATAAAGTGAGTT, GCTAATAAACTGATGATCCAT	5	45546, 1516, 1132, 27465, 68590	0.03217	64	0.003	63	0	0	2	2
Prf1	AGGGTGAAATTCTCCTACCAT, CCACTCCAAGGTAGCCAATTT, CGGTGTCGTGTGGAACAATAA, CTATGCATAGAGAGGCCACTA, GCCCATTTGGTGGTAAGCAAT	5	42761, 864, 72250, 1612, 22502	0.03228	65	0.003	55	0	1	2	2
Il25	CCACAACCAGACGGTCTTCTA, CGTCCCACTTTACCACAACCA, GAGTTGGACAGGGACTTGAAT, GCCACACCCACCACGCAGAAT, TCTACCGAGTCTCCTTGGCTT	5	1838, 49649, 27755, 198, 9788	0.03235	66	0.003	54	1	1	2	3
Nudc	CAATAAGATGGAATGGTGGAA, CAGATCAAGGAGTTGACTGAT, CGAAATCAATACCAAGAAGAT, CTGATCACACAGACTTTCAAC, GATGAGCAGAAGAAACAGGAA, GCAACTGGAGATTGACCAGAA, GTTGATGGAGAACTCTACAAT	7	37526, 39705, 308, 68232, 30698, 1384, 23109	0.03293	67	0.0045	84	1	1	2	2
Wdr62	ATGTTTGGCCATTCGGAAATT, CCTCGATGCCTGCTGACAAAT, CTCAGAGACTGAGGACTATTT, GAACAAGCAGCAGCATATATT, GGGATGCACAGGGAGTATTAT	5	12714, 23524, 1490, 1394, 89784	0.03321	68	0.0034	65	0	0	2	2
Vmn1r197	ACTAGTTGTAAAGCTGTTGTT, AGTCTGAACATAACACAGTTT, CAGCATGAACTTACCCTATTA, CCGAAGACAATAGAAGCATTT	4	668, 39000, 46249, 2073	0.03327	69	0.003	61	0	1	2	2
Vmn2r49	CCTACCAGTAAGACAGACATA, CCTTGTATCAGGGACACTAAA, CTGTAACACCTACACCATATT, TGGATGAAATAACGGATGAAT	4	66744, 52286, 529, 2122	0.03331	70	0.003	62	0	1	2	2
Car14	CCTTTGGATCTACACAATAAT, CTGCTAGGTAACCCTCTCTAT, GAGACTGAGAATCCAGCTTAT, GATCACATTCTGAGTCGTCTA, GCTGTTTATTTCATCGCTCAA	5	32807, 33, 51702, 1951, 48073	0.03334	71	0.0034	66	1	1	2	2
Csf2rb	ACTCATTCATTGAGCACACAT, AGAACCTAGATCGAGCCCATA, CAATGACTACACCAACCACAT, CATCACAAACGAAGACTACTA, GAGCGAAGAGTACACTTGGAA	5	87830, 46713, 53, 1977, 31196	0.03389	72	0.0037	69	1	1	2	2
Snph	ACACACTATGCAGCGACAATC, ATGGAGCTGATAGTGGATATG, CAGTATCTGACTCCACTGCAA, CCAGACAGACTTTGTGCAGTA, CCCAACCCAAGATGTCAATAG, GATGGAGCTGATAGTGGATAT, GCCAGCCCATTTACAACATCA, GCTCCATGAAGTACACACTAT	8	10023, 20637, 490, 54360, 78180, 1217, 89071, 26121	0.03409	73	0.0061	109	1	1	2	2
LOC100047429	ACATCTGTGGTCAGGCCCTTT, CCCTGTACTCTGCTGCATCTA, CGCTGTTCTCTCTGAGTTAAA, GAGTCCAAACCAAATACTGAA, GCCAACCTCATGAATTTACTT, GCTTCCTGAGTCCAAACCAAA, TGAGTTAAAGACGGTGCTGAA, TGTTCTGAATCCCTACATCAA	8	27614, 44966, 4217, 196, 1325, 7765, 28884, 82233	0.03434	74	0.0061	108	1	1	3	4
Chst9	CGTCCAGTAGGAATGGATATT, GCAAGAAATATGGTAGAGTAA, GCCGAAAGACAGCTCATCTAT, GCGTTTGAATACATATACCAA, TGCAAGAAATATGGTAGAGTA	5	3043, 88307, 796, 1763, 53857	0.03446	75	0.0039	74	0	1	3	3
Txk	CAGTTCTGCCTGCGTAGTAAA, CCAGGAACTGTTTGGTCAGTT, CCTAAAGGCCGTCCGACATTT, CGTAGTAAAGATCTCAGACTT, CGTGAGAGATTCGAGACACTT, GAAGGCATACACAGTCTTCAA, GACCATATACAGAGTGATGTA, GCCAACTTAGAAATCTATGAA, GCCCACCTGAAGTCTTTCATT, GCCTGGTAATTTGGCACTGAA, GCTTCGGGAATGAAGGCTTAA, GTGATGATGAAACTGTCACAT, TTCGAGGTTAGTTCAACTTTA	13	3154, 19950, 7092, 21630, 60241, 279, 64342, 42707, 841, 85051, 91132, 12967, 42130	0.03447	76	0.0062	110	1	2	3	4
Ghrh	CAGGACATCATGAACAAGCAA, CCATCTTCACCACCAACTACA, CTTCACCACCAACTACAGGAA, GAAAGTGATCCAGGACATCAT, GTGATCCAGGACATCATGAAC	5	28844, 1866, 39846, 495, 61798	0.03451	77	0.0039	73	1	1	2	2
Plod2	ACCACGATGCCTCAACCTTTA, AGCCGCATATCGGGTGGTTAT, AGGTCTTCGCAGGCTATTATA, CCAAGGTTACACTGGGTGTTT, GCCTGGTAATATGTTCTTATT, GCGGTGATGGAATGAACAGTA, GCTAGAGATATGGGTGTGTTT, GCTTCATTTCATCCGAGAGTT, GGCGCATCCCTGCAGATAAAT, TGATAAGTTGGATCCCGATAT	10	381, 88770, 62095, 23404, 74247, 1062, 7901, 46016, 47681, 69595	0.03455	78	0.0066	120	1	1	2	3
Sipa1l1	CGCCACTAGCAAATATCTGAT, CGGATATAAGTGGCAGTGGAA, GCACCCATTCACGCCTTGGAA, GCCATCTTACACGTTGGGAAT, GCCATTATGAACAGACATAAT	5	1199, 40588, 1646, 51881, 60464	0.03476	79	0.0039	72	0	0	2	2
Limk2	ACACAACTGTCTCATCAAATT, AGGACTACTGGGCCAAGTTTG, AGGACTTGAAGCGGTAGTATG, ATCAGTCCCAACAACCGAAAT, CAAAGGCATCTCCTCTGGAAT, CCCTCACCAACTGGTACTATG, GATGCACATCAGTCCCAACAA, GCCATCAAGGTGACTCACAAA, GCTGCAAACTAGAGCCTGAAA, GGACTTTGGCCTCAATGTTAA, GTGAAATGACAGTAGCGATTT, GTGAGATCATTGGGCAGGTAT, TGAGTTGCAAGGTGATCATTG	13	41068, 76985, 77334, 38263, 63790, 39, 41539, 3265, 14675, 4282, 74574, 936, 11034	0.03503	80	0.0064	113	1	2	4	4
Mrgpra1	CACGATTCTGATCCCAAACTT, CCAGATTGTATGTAACCATTA, CTACCCAATTACCTTTCTCTT, GCGGTTTCTTAAATACCCAAT, GTAACCATTATTCTGAGCATT	5	4774, 1080, 11496, 51511, 1739	0.03566	81	0.0041	75	0	0	3	3
Ysk4	AGGCCGATGTGTCGTTAATAA, ATGACTTCAGCCCGTTCATAT, ATTAATGGATTCCGGATATAT, CCAGGCATCTATGAGATGTTT, CCGTTCATATTGGCTAGGGAA, GCAGATGAAATCTCCAGGAAA, GCCTTGGATACTTCTGATAAA, GCGTCAGAAGAGGTTAGTGTT, GCTCATGCCAACGGGAATAAT, TGGTTCCATCTCTAGTATAAT	10	71058, 25678, 53861, 84101, 66286, 477, 1070, 40824, 73363, 1736	0.03571	82	0.0072	124	1	1	3	3
AI593442	CGAGAAATGATTGCCTCTAAT, GCAATTTGGATGACAGGACAT, GCCTGCATCTGATATACAGCA, GTGCTGGAATGCCATCTATTA	4	2307, 5708, 23257, 482	0.03576	83	0.0034	67	1	1	2	3
Ptprk	CCAATGAATACCAGGTAATAT, CCAGGATTTATACGATGACTT, CCCTATTACTTTGCCGCAGAA, CGTCACTATCTGCTACCATTA, GCCCAGACTAAGAACATAAAT, GCCGGGTGAAATGCTATAAAT, TACTTGCTGATCCAACTAAAT, TGTTACTGCACCGAGAGATTT, TTACGATCTCGGCGCATTAAT	9	597, 33042, 37840, 4068, 1121, 64611, 28713, 20993, 71298	0.036	84	0.0059	106	0	1	3	3
Wbp5	ACAAACTTATAGTGACGCGTT, AGGAGGAGAAATCCGAAGAAA, GAGCTAGATGAGATCAGGAAA, GATCAGGAAAGTGAGAAACAA, GCCCATCTTCCTACTTTGAAT	5	90392, 39544, 416, 80519, 1995	0.03625	85	0.0043	79	1	1	2	2
H2-Aa	CCTTCTGACGATGACATTTAT, GCACCTATGGTATAAGTGTAT, GTCTTGACTAAGAGGTCAAAT, GTGGGCACCATCTTCATCATT	4	35737, 93, 2478, 8089	0.03636	86	0.0034	68	1	1	2	3
Pax1	CGCACATTCAGTCAGCAACAT, CGCCTACGAATCGTGGAGCTA, CTACAATCATATCTACCAGTA, GCAGTGAATGGACTCGAGAAA, GCTGGCTTTGTTTCTACGTTA	5	438, 47138, 22146, 2004, 87829	0.03653	87	0.0044	81	1	1	2	2
Krtap13-1	CCAGTGGCTTTAGACCACAAA, CCATCCTATGTGCCCTATAGA, CTCAGGGTTATGGGTCTAGAA, CTTCCAGTCTTGTTGACCATT, GCACTGGATCTGGATTCTATT	5	2123, 70824, 16705, 35084, 100	0.03664	88	0.0044	82	1	1	2	2
2310033P09Rik	CGCACTTGGTTACAAGAACGT, GAAGAAACACAAGAAACACAA, GATGCAGAGAGCCATAAGAAA, GCGGACAAGACCAGTTCAATT, GCTGGATCTTAGGATCTATCT	5	1509, 24669, 1677, 43278, 83776	0.03704	89	0.0045	85	0	0	2	2
Dap	ACAAACACGTTTCTCCAAGAA, CCACAGAGTTTACTACATTTA, CCCACCTAAACCAACAGTGTT, GAGAGAGACAAGGATGACCAA, GTGTTCATCTCTGGCGTTATT	5	1649, 1620, 71949, 51669, 3918	0.03719	90	0.0045	83	0	0	3	3
Ap4b1	CCAAGACTTACACAGATCAAT, GCACTTGATTTCCGAGGAGAA, GCCAAGACTTACACAGATCAA, GCTCTGTGTAACCCTCATATT, GCTGCTTGTAAGTCCACATAT	5	993, 61703, 32129, 16848, 1898	0.03787	91	0.0046	87	0	1	2	2
Nox4	CCTACGCAATAAGAGTTTCTA, GCATCAAATAACCACCTGTAT, GCATTAGTCTTAACCAGACAT, GCCAGAATACTACTACATTCA, GCCAGTATATTATTCTCCATT	5	24176, 1601, 61610, 1699, 65130	0.03793	92	0.0046	86	0	0	2	2
Nrcam	ATAGATGGCGATACCATTATA, CCAGATTTAATCACACTCAAA, CCTCTCATACTACGGACATAT, CGCACGGAATAAACTAGGGAT, CGGGTTTCCCAAGGCCTAAAT, CGGTACAAGTTCTATTTCTAT, GAAAGCTCAAGTGCGGTTTAT, GATTACCTCCGGCCATAATAT, GCCTACCTACTCCAATTATTT, GGACACCCGTGAGGACTATAT, GGCCTACCTACTCCAATTATT	11	87643, 89359, 1205, 88107, 68802, 27071, 45082, 17, 23618, 44193, 69548	0.03874	93	0.0078	130	1	1	2	2
Rem1	CTCTCAGAATGTACCACAATA, CTGAGAAACTGGATGAAAGCT, GATATGACCAACTCTCAGAAT, GCACAATGTGACAGAGCTCTT	4	631, 7637, 8561, 2465	0.03877	94	0.0038	70	0	1	2	4
Mtif2	CCCACGAATGTGAACTCGAAT, CGGGAGATCAAGTCATTTGTT, GCAGAAATCTTGGAACTGAAA, GCCATTGACGTAGATTCATTA	4	64659, 70853, 2611, 242	0.03901	95	0.0038	71	1	1	2	2
Slc39a9	ATCCCGCTCATCCTATCAATA, CTAAAGACGATGGCAACTAAT, GCTGACATACTTAGGATTAAG, GTTACGTGGCCGGAATCATTC, TAATTGTGTTCGTGGCAATAA	5	83958, 51051, 1504, 70412, 1795	0.03902	96	0.0051	94	0	0	2	2
Cep350	ACCTAGTACCAGCCAATATAA, ATCTCTGGCTCAGATCATAAA, ATGTGGTATATCTGGTATTAC, GAACAGTACCAACCCTATAAT, TAGTCGGGAAGACCGGAATAT	5	119, 5751, 54523, 2267, 25390	0.03919	97	0.0051	92	1	1	2	3
Sar1b	CTGGTATTCCTTGGATTGGAT, GCATTGTATTTCTTGTGGATT, GCCTATTCTAATTCTTGGAAA, GCTTTCTAATTCCACACAGAT, TGCAGTTTCTAGGATTGTATA	5	62385, 47679, 40806, 113, 2278	0.03934	98	0.0051	93	1	1	2	2
Ddx3x	ACGTTCTAAGAGCAGTCGATT, CCACCTCATTCTTTAATGAAA, CCGTGATTTCTTAGATGAGTA, GCTGTGATTCTCCACTGAAAT, GTGGAGTTCTAGTAAAGATAA	5	3940, 23331, 52581, 1131, 1942	0.0394	99	0.0052	96	0	0	3	3
Wnt8b	CAAACCGGGAAAGAACTCCTA, CGAGACAGTGTCCAGCTGCAA, CTTCTAGTCACTTGTGTCCTT, GAGGCAATTTCCAAGCAGTTT, GCGCACTTGAAGGAGAAGTAT	5	1962, 55429, 20469, 14525, 1098	0.03955	100	0.0053	97	0	0	2	2
Fxn	CAAACTGGACTTGTCTTCATT, CCTCCAGATTCTGAACATCAA, GACTTGTCTTCATTGGCCTAT, GAGTTCTTTGAAGACCTCGCA, GCTCTTCATTTCTACAGACAT	5	1519, 1852, 49120, 55807, 13544	0.04007	101	0.0054	98	0	0	2	2
Slc22a18	CCTCTGCTTTGGCATTGGAAT, CCTTTGGCTACCTACAGACAA, CTCTGCATCTGTGCAACCATT, GCAGTTCTCCATCCTACCATA	4	19025, 1751, 28860, 2252	0.0411	102	0.0041	77	0	0	2	2
Bcap29	CCTTTATTCCTCCACAGAGAT, GCACACACAGATGAAGCTCTT, GCACTGTTGATAGTGTGTGTT, GCTGCCAAGAAATTCATGGAA, TCAGAACTTCAGAACCGTTTA	5	73280, 773, 17098, 51159, 2180	0.04142	103	0.0059	105	0	1	2	2
Trpc7	CTTACTTTGATGAAGGAAGAA, GCAAAGTACAACCCAGCGTTT, GCAACAGTCTATCGCTGTGAA, GCCAACATTGAGACTGAATTT, GCCGAATCAAACTCGCCATTA	5	2240, 35248, 59450, 629, 54043	0.04162	104	0.0059	104	0	1	2	2
Acvr1b	GAAGACTATCAACTGCCGTAT, GCAGGAAGATGTGAAGATTTA, GCTGCTATATTGACTTCTGCA, GCTTTATTGCTGCTGACAATA, GTGACCATTGAGGGAATGATT	5	52672, 275, 21223, 19687, 2373	0.04188	105	0.0061	107	1	1	2	2
Wasl	AGATTAACCAAGGCAGATATT, CAGGAAACAAAGCAGCTCTTT, GCCTCTTTACAGTACACTAAT, GCTGGAGATACTTGTCAAGTA, GCTTGTCTGGTTAAGGACAAT, TCAGGAAACAAAGCAGCTCTT	6	886, 58126, 1873, 52259, 16264, 16856	0.04207	106	0.0065	116	0	1	2	2
Olfr305	CCTTGGATCAGGAGAAGTATT, CTTTCTTGTGTCTGTTACAAT, GAGGTCATTATGAATAGTGTT, GTGATGTTCCATCACTCTTAA	4	6015, 2798, 427, 51343	0.04261	107	0.0048	90	1	1	2	3
Fam36a	CAGGAAAGAATTGCCAGAGAA, CCAGGAAAGAATTGCCAGAGA, CCAGTAGAATTAGAAGATCAT, GAATTGCCAGAGAAGGAATAA, GACTGGACTTGGACATTTCTT	5	52012, 34359, 62217, 230, 2447	0.04288	108	0.0063	112	1	1	2	2
Sppl3	CGCTATGACAACTACAAGAAA, CTCCTCTACTTGGTGCCATTT, GCACATAGATATCTGTGAGTA, GCCTACATCTTCAACAGTAAT, TCCTCTACTTGGTGCCATTTA	5	2095, 40901, 48627, 77777, 1442	0.04376	109	0.0065	115	0	0	2	2
Ascl1	CAAGTTGGTCAACCTGGGTTT, CCACGGTCTTTGCTTCTGTTT, CCGGAACTGATGCGCTGCAAA, CGGTCACAAGTCAGCGGCCAA, CTCCAACGACTTGAACTCTAT	5	2170, 4224, 50510, 58977, 1246	0.04393	110	0.0065	114	0	0	3	3
Srgn	CCAACAGATGAAAGCAATATT, CCACAGTTTGACCTAATAGAT, CCTCATTAACTCGTAAGGAAT, CTCCCATGAATAATCCTGTTT, GCTTCCTAGGTGACATGGAAT	5	697, 2353, 5204, 76506, 36650	0.04393	111	0.0065	117	0	1	2	3
Pofut2	CCGTTATAGAGTATGAGCAGT, CGCAGGACAAGCATGAGTATT, CGCTGTTGAAGACTGAAGAGT, CGTTATAGAGTATGAGCAGTT, GAGTATTACAGAGGCTGGTTT	5	89584, 772, 2332, 84650, 30511	0.04399	112	0.0065	118	0	1	2	2
Eif3a	CCACTAATTCATGCCTTTCAA, CGAGTCAAGAAACTAGAAGAA, CGCACTGATGACAGGAAAGAT, GCCTCAGTTGATGGCAAATTA, GCTATGTGACAACTTGCGAAT	5	2032, 21114, 51864, 1773, 90689	0.04457	113	0.0066	119	0	0	2	2
Xpo1	CCAGTTAACAACCAAATGTTT, CCCAAGTTAAAGCAAAGCATT, CCCATTGTAAAGCAACTTCAA, CGTGTTATCAAAGGTCCGTTT, GCAGAACATGAACACGAAATA	5	116, 57596, 2652, 55698, 26009	0.04572	114	0.007	122	1	1	2	2
Plcb1	CCCGGCTCAATGAAATCCTTT, CCTCCAGTGAGGAGATAGAAA, CGCATGATAACTGTGGTGTAT, GCAGATAAACATGGGCATGTA, GCTGTCTTTGTCTACATAGAA	5	70655, 37035, 2692, 90406, 24	0.04587	115	0.007	121	1	1	2	2
Ninj2	CCTGACTTGTCAGGATAACTA, CCTTCTTGTGTTCATCGCCAT, GCCACCATCTTGGTCTTCATA, GCTCTTTATGTCCAATGCCAT	4	22362, 611, 2990, 20035	0.04629	116	0.0056	102	0	1	2	2
Diap2	GATGGAAGATATGAACCTTAA, GCCCTAATCCAGAATCTTGTA, GCCTGTTATTCAACATTCTAT, GCTCATCAGAAATGATTACTA	4	61, 3201, 49482, 60005	0.04669	117	0.0056	101	1	1	2	2
Olfr155	CAGAACTTCCAACCTCTTCAT, GTCACAGTGCAGAACTTCCAA	2	1879, 3963	0.04716	118	0.0024	47	0	0	2	2
H13	CACCATCTTCATCATGCACAT, CCAGGAGTACATCAACCTCTT, CTATGACATCTTCTGGGTATT, GAGATCATCAACTATGAGTTT, GTGGCCGAGATGTTCAGTTAT	5	85284, 2629, 461, 10276, 60168	0.04728	119	0.0077	126	1	1	2	2
Keap1	CCAATGTTGACACGGAGGATT, CCTAAGGTCATGGAAAGGCTT, CGGAAGCAAATTGATCAACAA, GCACTGACAACAGGACAGAAA, GCCCAATTCATGGCTCACAAA	5	58866, 25492, 49682, 1212, 2385	0.04739	120	0.0077	128	0	0	2	2
Csnk1g1	CATCACAACAACAGCCTCTTA, CCAATGAATATGTAGCCATTA, CCTAGCTTGGAAGACTTGTTT, CCTTCGATATGTCAGGCGATT, GCCATTAAACTGGAACCAATA	5	12428, 1564, 3701, 70355, 2281	0.04761	121	0.0077	129	0	0	3	3
Cxcr7	CCCACTGTCTACTCAGGAAAT, CCCTCTCCTTCATCTACATTT, CTTCACTATCATTGCGATCTT, GCAAGATCACACACCTCATTT, GCCTGGCAACTACTCTGACAT	5	40048, 1947, 10844, 2166, 39505	0.04783	122	0.0079	132	0	0	2	2
Ugt1a10	AGGCTCAGCTAGAGGTTTCTT, CCAAGTATCTGTCACTCCCAT, TGCCCGAGTCTTCTTTCTTAT	3	3066, 2417, 34378	0.04792	123	0.0044	80	0	0	2	2
Tmem33	CGCAAAGGGTTCAAATAGTTT, CTGAAATTCATCGCTTGTAAT, GCAAAGGGTTCAAATAGTTTA, GCAATTCATGATGACCAATAA, GCATCAGAGATTACCTCACTT	5	2789, 89994, 15047, 102, 3991	0.04796	124	0.008	133	1	1	3	3
Rbm39	CCGAGAGATTTGGAAGAGTTT, CCGCACAACAAGCATTACAAA, CGAACTAGAAAGGACTGGAAT, GCTGCGTCTGTTCAACCTCTT	4	1918, 2715, 37100, 47411	0.04862	125	0.0059	103	0	0	2	2
Ebag9	CAAGGACATGACACCAACTAT, CCCACAAGTGTAAAGATCGAA, GCAACAGTGTTCTCGTTCCTA, GTTCTCGTTCCTAAAGAGATT	4	502, 3250, 19691, 34882	0.04953	126	0.0063	111	0	1	2	2
Tmem90b	CTACTCCAGCGACACAGAAAG, GCAGTCCTGTCCATTACTATT, GCCTTACTCTGTCCACTAAAT, GGCTTAATTAACACCAGAAAC, GTCCCACTATCGTCCCAATAT	5	64981, 71459, 1083, 2578, 16896	0.04994	127	0.0086	137	0	0	2	2
Ccdc163	CAGGTTCAAGAGCTAGTCCAA, GAGAGACTGAGCTGTACTGAA, GAGTTGTTGCTGGAACAAATA, GCGGTTCTCAGTTCAACTGAT, GTTCTCAGTTCAACTGATGAA	5	69350, 50451, 227, 2869, 17822	0.05003	128	0.0086	135	1	1	2	2
Ydjc	CAGATGCGTTCTCTTGTTCTT, CATTGATGACCTGGATTCCAA, CCAGATGCGTTCTCTTGTTCT, CCATTGATGACCTGGATTCCA, CCGCTGATGACTTTGGTTATT	5	84, 2924, 25466, 32060, 84140	0.05016	129	0.0086	136	1	1	2	2
Adprhl1	CACATGGCAGAGTACCAAGAA, GAAACCGGATAACTACCTCCT, GAACACAAAGGCAGACTAGAA, GAAGACAAAGTCACCTTTCCT, GAGAGACAAGACCTACAAGAA	5	9195, 46224, 8975, 632, 2748	0.05027	130	0.0087	139	0	1	2	4
Gm10696	ACTAACAAACCGTGTTGATAT, ATACACACATATCAGCGTTTA, ATGAGTTCTGGATCATAAATT, GCATAGTGGGAACCTTCTTTA, GTTAAGGTTCTAGTATGATTT	5	40962, 87667, 2309, 1984, 64972	0.05047	131	0.009	140	0	0	2	2
5330416C01Rik	CAAGCGTGTGTTCTTTCTATT, CATAAACTGTGCCTCTGCTAT, CTTTCTATTGTCCCATTAAGA, GCTATACACAAGCAAGATTGT, GCTCAGTATGTTTGGGAGTAA	5	2868, 47808, 70459, 349, 45053	0.05071	132	0.0091	142	1	1	2	2
Slc35f5	CCACCTAAGTAAGATGACATT, CCACTGTGAAAGACCAAGAAT, GCACAAACATTGGGACCGAAA, GCAGTACAACAAGCCATTCTT, GCTGAGTTCTTTACCTCCATT	5	89976, 219, 28228, 2913, 63016	0.05073	133	0.0091	143	1	1	2	2
Myf6	AGCTACAAACCCAAGCAAGAA, CCTTTGTATCCAGGGAGTGAT, CGAAAGGAGGAGACTAAAGAA, CGAAGTTCATTCCTGTCTAAA, TCTTCTACTTAGATGGAGAAA	5	1360, 2534, 50064, 37667, 85653	0.05076	134	0.0091	144	0	0	2	2
Apoc1	CCCGGATTTGTCCGGAACATT, CCGGATAAACTGAAGGAGTTT, GAACATATCAAACAGAAGGAA, GCAGCCATTGAACATATCAAA, GTCGTAGCCATGACCTTGGAA	5	21518, 81498, 291, 2895, 20110	0.05084	135	0.0091	141	1	1	2	2
Ywhae	CAGTTGAAGAACGAAACCTTT, CCAGACATATTTGACAGTATT, CGACGAAATGGTGGAATCAAT, CGCTGAGTGAAGAAAGCTATA, GATGGTGAAGAGCAGAATAAA, GCTGAGTGAAGAAAGCTATAA	6	60547, 42638, 81908, 1992, 26778, 1926	0.0511	136	0.0097	155	0	0	2	2
Tubb5	CGAATCTCTGTGTACTATAAT, GACCGAATCTCTGTGTACTAT, GCTATCTTGGTGGATCTAGAA, GCTGCTTAGATCCCTCAGCTT, TGAGCAGTTTACGGCTATGTT	5	89519, 2349, 48151, 1987, 79462	0.05116	137	0.0091	145	0	0	2	2
Arl4c	ACACGATCTCTGTATCCAAAT, ACCGGCTCAAGTTCAACGAAT, AGAAGCGGTAATGCGCTAGAG, CCAAAGCGATGATTCGAATTT, CCCTCCAATTTACTGGTCTTT, CGAGAAGATCAAACTGAGCAA, GAAACGCAGGAAGTCTCTCAA, GAGGGCATGGACAAGCTCTAT, GCATCATCTACGTGGTGGATT, GCTCCTGGTTATCGCCAACAA, GCTCTATGAGATGATCCTGAA, GGTGACCAAGTTTGCGGAGAA, TCAACACCGAGAAGATCAAAC	13	3929, 74166, 68593, 617, 53066, 36109, 57651, 46509, 72520, 30348, 91492, 36047, 1186	0.05136	138	0.0129	193	0	1	3	3
Tgm6	CAATCTGAGTGTGGACAAATA, CAGTTTATTCTCCTGTTCAAT, GCAATCTGAGTGTGGACAAAT, GCCATGAAGAATATGCCACTA, GCCTTGATTCAATTCAACATA	5	2768, 42608, 779, 13229, 88273	0.05144	139	0.0092	146	0	1	2	2
Ccbl2	CCTAACCATGTTCGGTACATT, CGTCAAATTGATCCAAACGAA, GAGCCTTATGACTATAAGTTT, GCCAAAGGAATTAGAAGTAAA, GTGAAGTGGATGACGAAACAT	5	17120, 16527, 581, 59692, 2841	0.05156	140	0.0093	149	0	1	2	2
Scin	CCGATTGTCATCATCAAGCAA, GCAACAAATATGAGCGTCTGA, GCTACATTATCCTCTACACTT, GCTGAGTTTGTTCAAAGACAA, GCTGTATGTTACTATACTGAA	5	2955, 54530, 258, 77973, 54858	0.05167	141	0.0093	148	1	1	2	2
Wnt3a	ACCCAACTTCTGCGAACCTAA, CCTCACTTTGAGTTGTATGAA, CGCCAGTCACATGCACCTCAA, GCCACGTTACACGTACTTCAA, TGTAGTGAGGACATTGAATTT	5	7174, 4981, 6050, 1283, 2617	0.05173	142	0.0094	150	0	0	3	5
Gtf2b	CAGCAATGACAAAGCAACAAA, CGAATCATCCAGATGCAATTT, GAAAGAAATTGGCCGCTGTTT, GCGATATGATCTGTCCCGAAT, GCTTAGTCTTCTGTATGTATA	5	666, 73379, 82934, 2831, 10153	0.05187	143	0.0096	153	0	1	2	2
Lrrc57	CATCGATTTATCCAACAACAA, CCTTTGTCAAAGGAGCACCAA, CGAACTCAATCTCAACCAGAA, GAAGGCAATCTCTTTGAAATA	4	761, 21565, 3328, 13944	0.05191	144	0.0071	123	0	1	2	2
Fcrla	CCACGAAGGTTGCTGACAAAT, CCAGCTACATTGATATTTGAA, CCGCAATAATTCCAGCTCTTT, CTCTTCAGAAACCAACCGCTT, GCCACTGACTCAGGTTATCTT	5	2407, 67063, 2896, 2010, 24019	0.05228	145	0.0097	154	0	0	3	3
Ifi27l2b	AGTTATGAGAAGTGATATTTG, ATTTGTGGGCGCTGCTATAGG, CCAAGTTGTAAGAAGCAAGAT, CCAGTTTAACTCAAAGCTTAT, CCTCCAAGTTGTAAGAAGCAA, CTCCACAATAACCAACATCAT, CTCCACATCAACCAATATCAT, GCCAAGATGATGTCTGCTGCA, GCTAGAGCTGAAGGATCCATG	9	90937, 69204, 17861, 79158, 28384, 1485, 1310, 2662, 8965	0.05241	146	0.012	178	0	0	3	4
Fam198a	CAGAGAGAAGCCACGAATCTT, CAGGATCGTGAGCTTCTATTA, GACAGCATTTCTGTGACAGTA, GAGACACATTAAGAAGCACAA	4	2474, 65755, 60439, 2830	0.05297	147	0.0076	125	0	0	2	2
Gm12541	CAGTTGAGAATGAGACATAGA, CATGCAATGATCTGTCTCATA, CCATTGCCTTTCCTGGTAATT, GCCACACAAACTGGACTTGTT, GTCACTGTAAAGAGCCAGGAA	5	31142, 24196, 1300, 2708, 16121	0.05337	148	0.0101	161	0	0	2	2
Utp14b	CCGATCACAAGCAGCTAATAA, CCTGATCTAGTAGCTCATATA, GCAGCAGTTTGAAAGGACTAT, GCCAGTAACAGACCCTTTATT, GCTCAGTTAGTTTAGATAGTA	5	21903, 2582, 80145, 1684, 90302	0.05341	149	0.0101	160	0	0	2	2
Fgfrl1	CCACCTACAAAGTGGATGTAA, CTCATCATCATGGATGATATT, GCCAGACATCATGTGGATGAA, GCCATATAGATGTATGTACTA, TGTCCACTATCAGTGCTAAAT	5	64371, 5506, 2496, 1964, 16043	0.05353	150	0.0101	159	0	0	2	3
Cnot2	CCATGTTCCATCAGAATATTT, CCTTTCAGATTTCCCAGCGTT, CGAGTTACTAACATTCCTCAA, CGGCAACCCAACTCCATTAAT, GCAATCAAACTTGGCCGATAT, GCATTGTTCATTGTAGCACTA, GGTCCTGCCTTACCAATTATG, TGACGACAGCAAATCTAATTT	8	2548, 20177, 88801, 2177, 22400, 18, 86533, 53558	0.05391	151	0.0123	181	1	1	3	3
Gtf2h3	CAGAGTGAACAAGGCAGTTAA, CGAGCTGTTGACAGTTGCAAA, CTACATTCACAGAGTGAACAA, GCAGTCATAACAGAGCATCTT, GCATTAAAGGAATCTCAGTTT	5	80853, 69346, 473, 3016, 12224	0.05392	152	0.0101	158	1	1	2	2
Tbc1d5	CCATCAGTTCATCTCCAAGTA, CCCAACTTAGACTACTACAAA, GAGCCTGGTATAGCAGTATTA, GCAGGGTTTCAGATTAGGAAT, GCGTTGAGAATAAGGTCAATA	5	2639, 1643, 42405, 73045, 4273	0.05414	153	0.0102	162	0	0	3	3
Dpm2	CCATTCATTGACAGCCAGCAT, CCTGTCCATCTCACAGTCAAA, CGCCGTTAGCTTGATCATCTT, GCATGTCATCCACAAATACTT, GTGGGATTGTTCATCACCTAT	5	16110, 5856, 895, 2907, 45813	0.05446	154	0.0104	163	0	1	2	3
Srpk3	AGCACTTCACTGAGGATATTC, CCCAGTGAAGATCGGTGATTT, CCCTGTGTTAAGAGCATTGTT, CCTCCATACTAAGTGCAAGAT, GCTCATATCGTGGAACTTCTA, GCTGTGGACAGTAGAGACTAT, GGAGACCATTGTTCAACTTAT, TTGCCCTCTCAGGCCGATATT	8	77594, 30869, 74857, 20589, 379, 63382, 2086, 46126	0.05464	155	0.0123	182	1	1	2	2
Zfp619	CCGAGGTCAGAGTTCTCTTAA, CCTTAAAGATAGAAGTTCCTT, CCTTGCTTCTGTGGGAATCAA, CTTTCCTTCAACGGCACGAAA, GCCAGATTCTTCCGTGGTTAA	5	55512, 91594, 2383, 88254, 2432	0.05482	156	0.0106	164	0	0	2	2
Rad52	ATTGTTCCACCTTGGCTCATG, CAGACTTAGAGGACATCATTA, CATTTGTAAAGGTGCAGTTAA, CCCACATGACTCGAACATTAA, GACTGGGTCCAGAGTACATTA, GATGTCACTAGACCGTCACAA, GCAGAGACTCTGAACCTCATA, GCATTTGTAAAGGTGCAGTTA, GCCAGTATACAGCGGATGAAT, GCTGAACTCTTTAGAGGACTA, TACGTGGGAGTCTGTGCATTT, TCCCTCTTGATGTGGATTTAA	12	52189, 61450, 21911, 10165, 47285, 81529, 1165, 1220, 20321, 13773, 18256, 75228	0.05543	157	0.0156	233	0	0	2	2
1700054O13Rik	CCAACATCAACAACCAGCAAA, GCTTCAAGAATGCGCCTTTCT, GCTTGATTACCTCACCGACTA, GTGAATTATGTGTACCGTATA, TGCAGCGACAACAACCAGATA	5	35638, 469, 3117, 22157, 56771	0.05562	158	0.0109	166	1	1	2	2
Csnk1g3	CCACTCAAAGAACTTGATATA, CCAGCAAGTCATTCATATCAT, CCAGGTTGTAAGTTCTACAAA, GACGAGACAAACTGCCAGAAA, GCACTCGAGGAACTGGGTCTT, GCAGAGTAGAAGAGATGATTT, TGGGTCTTCTTCATCTGGAGT	7	27905, 188, 65928, 58740, 11643, 2473, 52336	0.05617	159	0.011	168	1	1	2	2
Rorc	CACCTTGAGTATAGTCCAGAA, CGAGCTCATCAGCTCCATATT, CGGAGCAGACACACTTACATA, TGCCAGAATGACCAGATCATA	4	2635, 15073, 43988, 2999	0.0562	160	0.0081	134	0	0	2	2
Chrm5	CCATCACAAGACCACTGACAT, CCCAGTAAATCACCAGGCTTT, CTGTGGGAAGTCATTACTATT, GTCAGAAGTGTGTTGCCTATA, GTCCTAGTCAAAGAGAGGAAA	5	22395, 75597, 65764, 1484, 2818	0.05628	161	0.0115	173	0	0	2	2
Gca	CCCTCATTGTTTGTAGAAATT, CGACTCCATGTGGACTTATTT, GACGACTCCATGTGGACTTAT, GCGCCCTGACAGATTTCTTTA, GTCTGGAATTAGTGGAACTTA	5	42396, 3216, 6095, 67341, 365	0.05671	162	0.0119	174	1	1	2	3
Rabep1	CCATTTAGTAAATCGGACAAT, CCCTGATAGCAGGATTCTAAC, GAGAAGCTGAAGGCGGAAATA, GCTATTCTGAATGATACCAAA, GCTTAGTGAGTGAGACGGAAT, TACCATCTGGAGATCCATTTA	6	20215, 71995, 2561, 56402, 1105, 72780	0.05683	163	0.0119	175	0	0	2	2
Vrk3	CAAGTACAGGTTCCTAGTATT, CTATGGCTTCACCTACCGATA, CTCTGAATCAAGGACCCAGAA, GCTCTGGAGTATCTCCATGAA, GCTGAGAATGTCTTTGTGAAT	5	20, 91844, 21471, 3352, 24665	0.05707	164	0.012	176	1	1	2	2
Prnp	CCGCTACCCTAACCAAGTGTA, CGACTGCGTCAATATCACCAT, CGAGACCGATGTGAAGATGAT, GACAACCTCATGGTGGTAGTT, GCATTGTTTAAATCAGGCAAA	5	76940, 3122, 713, 43160, 51821	0.05708	165	0.012	177	0	1	2	2
Polm	ACAGCCAGCTCTGCTAGATAT, AGCTGTGAGGGTAGATCTTGT, CCATGATGTAGACTTCCTTAT, CCCAAAGTGATGAGCTGCCTA, CGAGACCTATAAAGTCCCTTT, CTCACCTCTCACACACCATAA, CTGCCCTACTTTGGAGAACAT, GAAAGCAGGGCTCCAATATTA, GAACATGTGAAGAAGTGAAAC, TGGACTGGCTCCCAGTTCTTT, TTCCGCGTCCTAGATGCTTAC	11	88973, 86840, 622, 85245, 28937, 39838, 43329, 41802, 1586, 88447, 32059	0.05739	166	0.0152	226	0	1	2	2
Olfr1101	CCTGTTTGCTATCTTGAAGAT, GCCTCCAATGTTGGTGGTATT, GCTCCATTGAGGTAGTCACTA, GCTGAACTTCAGATCAGTCTT	4	27152, 26577, 3298, 1986	0.05739	167	0.0086	138	0	0	2	2
Vapa	ACAGATGTAGTCACTACAAAT, AGATTTGTTTACCTACCATTT, CAAGCGACTCCAGGGAGAAAT, CCACACAGTGTTTCACTCAAT, CCCTCCTTCAGACCTCAAATT, CCCTTTGATTATGATCCGAAT, GCCGTGTCCTTCAGAGATAAT, GCTAATATCATGGCAGAATTT, GTTGCACATTCAGTCCTTTAT, TGGATTCTTTCTAGGGAAATT, TTTGTGTGTACAGCGTCATAT	11	301, 42435, 55013, 1712, 38386, 29422, 83122, 11166, 91859, 84944, 48179	0.058	168	0.0155	232	1	1	2	2
Rnf125	AGTACCTTCAATGGCAGTTTA, GCAAGATGTGTATGTCCATTT, GCACATAAGGACCTGTGAGAA, GCCATTCACGACCTGATGAAA, GCCCTTACATTCTTGAGTCTA	5	1366, 2982, 37544, 40843, 16761	0.0584	169	0.0122	180	0	0	2	2
Ppp5c	AGCTCCTGTATCCAGATCATT, CCAGATCATTTCCATCTACTT, CCCTATATATTTAATGGCGAT, GAGGAGAATCAACTGGACTAT, GTGGTGAAAGTGAAGCCTAAT	5	562, 3256, 72964, 38087, 78215	0.0585	170	0.0122	179	0	1	2	2
Ryr3	CCGACATGGTTCAGAGAGAAA, CCGAGCATCAAAGGAAATCAA, CGCTGGTAGAATCATCCACTA, CTGTGGTTGTTTACCTCTATA, GCAGCCATATTTAAGAGTGAA, GCAGGTTTCATGCTACCACAT, GCCCTCGTATTGAATTGCATT, GCGATGGTGTTCTTTGTTCTT, GCGCATTTCTTTGAAGAGAAA, GCGGTAAATATGAACCGAGAT	10	57431, 62029, 27428, 25514, 47656, 658, 33825, 38454, 44451, 1809	0.05894	171	0.0178	264	0	1	2	2
Iars2	CCAAGGCTTACACAGAAAGTA, CCCGATAAAGTGTCTCCTCTT, CCGATAAAGTGTCTCCTCTTT, CGTGAAGAATATGTATGTCAT, GCTGAGAGTATTCTACCAAAT	5	3021, 3134, 1347, 56680, 47067	0.05896	172	0.0124	183	0	0	3	3
Bloc1s1	GAACTTCAACCAGGCACTTAA, GAAGAGGAGGAGAGAAGCTAT, GAGAACTTCAACCAGGCACTT, GAGCTGGACATGCGCACCATT, GATTGGAATGGTGGAGAACTT, GTGGATTGGAATGGTGGAGAA	6	86168, 92360, 63351, 1433, 64993, 2573	0.05919	173	0.0131	198	0	0	2	2
Olfr945	CTTACAACCATCACGAGTGAA, GAATATCTTTGCTCCAACATT, GCTCCAACATTGATCATTATT, GCTGCATTCATGTACTTACAA, GTCCTGACAAGGATTCAGTTT	5	1250, 3074, 34709, 33408, 14307	0.05931	174	0.0126	187	0	0	2	2
Clybl	CCGAGGAAGTATGATCGACAT, CCTGAAGAAATCCGATGGTTT, CTGAATGGATACTGTGGGCTT, GCAGTGGTACAGGAACAGTTT, GCCATAGATCTTGTGTACATT	5	56029, 2851, 9774, 1936, 30964	0.0594	175	0.0127	190	0	0	2	3
Setbp1	CCACGCAAGTTCTCATGTAAA, CGGCTTTGAATCCCAATCATT, GCAGCATCTATCGAAAGTAAA, GCCTATGATGAACCTTGGTTA, GCTGGATAAGAAGACCATCAA	5	73992, 77069, 44859, 2873, 1907	0.05961	176	0.0127	189	0	0	2	2
Nkx6-2	ACTTTCGAGCAGACCAAGTAT, CCGATCACTTTGTATAATCAA, CCTGGATAAGGATGGCAAGAA, CGCTGCACAACATGGCTGAGA, TGAGATGAAGACGTCGCTGTT	5	1498, 87887, 31947, 65111, 3012	0.05966	177	0.0127	188	0	0	2	2
Hadh	CCGTTTGAGCTTCTTGACTAT, CCTTGCAGTCTCTCTGAAGTA, CGTCTTCTTTGCAGATCACAA, GCAAAGAAGAAGTTCACAGAA, GCCCAGTCCTTCCATGAATAA	5	12975, 726, 3274, 82913, 7212	0.05974	178	0.0129	192	0	1	2	3
Adi1	GAGAAGATCAAGATGTTCTTT, GCAAAGATACACTTCCCAATT, GCCAATCTTCATCTCCCAGAT, GCTGTTTGTTGGAGAACCTGT	4	43434, 3639, 5996, 1513	0.06005	179	0.0092	147	0	0	2	3
Gpr34	CCAGTACAGCACTAAGGGTAA, CCGCATAATGTATCACATCAA, CCTACTGATAATCCTCTCATA, CCTCTCATGGAATGCACTTTA, CCTCTTGTTATTGGAAGGAAA	5	17451, 90482, 3188, 1060, 33660	0.06017	180	0.013	194	0	0	2	2
Lemd2	GATGGACTAAGCCTTCCTCTT, GATGTGGTTCAGGACCACTAT, GCGCAGGAGTACATAGCTAAT, GCTGCACGAACTGTACAACTT, GTATGAGATGGTGAAGAAGAT	5	23297, 3864, 49211, 3494, 173	0.06034	181	0.013	195	1	1	3	3
Clec2g	CAGCAGTTCCAGGCACTATAT, CATGTTTGTGTATCACATGAA, GAAGGAGCTGAATTTCCTAAT, GAATGCTCAGTGCCTAAAGAA, GCGAAATGTTTCTCCACTTTA, GCTGAATTTCCTAATGAGATA	6	92416, 64949, 88655, 41737, 2975, 415	0.0604	182	0.0136	210	1	1	2	2
Tubb4a	CCACTTCTTCATGCCAGGATT, GACAACTTTGTATTTGGTCAA, GCCACAGGTGGAAACTATGTT, GCTTCACCTTTAACTCCTAAA, GTTTACGGAAGCAGAGAGCAA	5	3025, 76889, 1607, 37322, 28719	0.0605	183	0.0131	197	0	0	2	2
Ugt2b36	CCAGACATTTAGGGAGAAGAA, CCTCATTGTAAAGTGCTTCTT, CTCACTTATCACTTTACAGAA, GCTGTGGAAAGATGGACTTAT, GCTTCTTGTTTGTTTACCGAT	5	2341, 2791, 23070, 3818, 17778	0.06068	184	0.0131	196	0	0	3	3
Olfr57	CCTGCATTACATGATCATCAT, GCTGGATTATAGGTGTTATAA	2	3004, 4913	0.06078	185	0.0041	76	0	0	2	2
Zbtb10	ACAAGTTGAAATGCCCTCATT, CATTCTGGAGTAAGATCATTT, CCACACAAGAAACGTGGGAAA, GACTTCAAATTCGGATTGCTA, GATTTCAAGTATGGGTTGCTA	5	3444, 7678, 10773, 30516, 436	0.06098	186	0.0133	199	1	1	2	3
Kndc1	CTAGTGCTGCCACATCATAAG, GAATCCTGCCTGCGAAGATTG, GCTGAAATTGTGACCAGTCAT, TCGGTCTCAGAAGTCAATAAA, TGAGAAGTTCTGTGACCTATA, TGCTACGAACAGAGGAACTTT	6	70609, 18466, 2472, 90762, 2054, 65726	0.06124	187	0.0139	212	0	0	2	2
Defb38	CTCTATATTTCTTCCAGATCA, CTCTCTATATTTCTTCCAGAT, GATCCTCTCTCTATATTTCTT, TATTTCTTCCAGATCAACCAA, TCTCTCTATATTTCTTCCAGA	5	29520, 429, 25067, 6648, 3465	0.0613	188	0.0134	201	1	1	2	3
Sgip1	CCAACTTCTCTGCTGTGATAA, CCTTGTTTCTTCTTTACTCAT, GCCTTTGGAATACGGAAGAAA, GCTTCAGTTTAGTGGGTTAAA	4	3910, 47755, 25101, 972	0.06136	189	0.0095	152	0	1	2	2
Chrdl1	CGTGCAGATTGTCATCAATAA, GCAGAATTATCGTGGGAACAT, GCAGCACCTAAGAGATCATTA, GCGAATACAATGGAACCACTT	4	49735, 14064, 4222, 49	0.06143	190	0.0095	151	1	1	2	2
Rc3h1	CCTAAGAGTATTTCTGCCTTA, CGCACAGTTACAGAGCTCATT, GCAGATGTTTATTATCAGGAT, GCCAAGAAATGTGTAGAAGAA, GCCTGAATAAACTCCACCGTA	5	45257, 335, 73667, 15152, 3516	0.06164	191	0.0135	206	1	1	2	2
Tbc1d9	CCCAGCTTTCCAGAACGAAAT, CCGTACCGAATCCTTTATCAA, CGAAGTACTTTAGTGAGACTT, GCTCAGATGATGAGGTGTATT, GCTCTGTAAGACCATGTACAA	5	79663, 2480, 35647, 36113, 2807	0.06174	192	0.0135	204	0	0	2	2
Fam96a	CACAAGTTGGAAATCTACATT, CATGTTGACTAGATAGGTGAT, GAGGATTCTTTCTGAGCAAAT, GCTAGTTTCAATCCTTTGTAA, GTTATTATCAAGTTCACACCA	5	3028, 68462, 19738, 1824, 56295	0.06178	193	0.0135	202	0	0	2	2
Ndufb3	CATCACCTTCCCGAGTGTAAT, CATGGACATGGCCATGGTAAA, CCAGATTACAGACAGTGGAAA, GCCATTAGAAACGGTGCAGAA, TGCTGCGTTTGTGGTAGCTTT	5	266, 37284, 61406, 3548, 79023	0.06179	194	0.0135	205	1	1	2	2
Aip	CACCACTGCTACTCAACTATT, CCGTTATAGATGACAGCCGAA, CCTCAACAAGTATGATGACAA, GCTCATCGTTGGCAAGAAGTT, GTGGCTCAGGAGTATTATGAA	5	17099, 87802, 60935, 522, 3471	0.06193	195	0.0135	203	0	1	2	2
Kmo	CGCTTTGATTACACTCAGCAA, CTTTGATTACACTCAGCAATA, GCCCATGAAAGCCAGAATGAT, GCCTAGTGCTACTTCCTCTTA, GCCTATATGATGATCGCCCTT	5	1222, 12120, 3254, 54594, 20005	0.06221	196	0.0136	209	0	0	2	2
Snai3	CCAGTGTGACTCTTAAAGACA, CCTTATGTACACATGCGTGTA, CGGAGCTCTAAATGAACATCT, GCCGAATCACAGAGAAACTCT, TCACGTTGGTACCAAGAAGTA	5	40959, 2176, 21478, 77556, 2941	0.06229	197	0.0136	208	0	0	2	2
Akap12	AGCTAGAGCCAGCTAACATTT, AGGAGGAAACACCGGAAATAA, CCAGGAGAATACCAACACATT, CGGCTTCAAGAAGGTATTTAA, GCAGAGTCCATCCCAATAATA, GCCAGCTAACATTTCCTCTTT, GCCAGTGTCAAAGAAAGTGTT, TCGGCTTCAAGAAGGTATTTA	8	90742, 8921, 1819, 70625, 1917, 37127, 86439, 78088	0.06232	198	0.0159	239	0	0	2	3
Gfra3	AGAAAGAAATGCGAGGCTAAT, CAGAAAGAAATGCGAGGCTAA, CCACTGTCATCCTATGGACAT, GCTACCTGTCTGGACATTTAT	4	67433, 3725, 51753, 1747	0.06243	199	0.0099	156	0	0	2	2
Qrich1	CCAGATGTACTCTACTACATT, CCCAGATGTACTCTACTACAT, GCAACAGAGTTATGTGTCTTT, GCTGAATTGAATTATGGCCTT	4	2346, 3538, 65710, 29647	0.06261	200	0.01	157	0	0	2	2
Fpr-rs7	ATTGCCATGGATCGCTGTATT, CAGTGAAAGATGAAAGTGGTA, CCATTTCAGATCACCTCAATT, CCTCAGTTTCATTGTTGGCTT, GTGGTAAAGTACACTGTATAT, TCTTAGTTGTGGTCCTCTCTA	6	91655, 49891, 875, 37008, 2951, 46450	0.06291	201	0.0142	215	0	1	2	2
Prdm5	ACGGACTGAAGATGCACATTC, AGCTGAAGCGTCACATGATTA, CCCAGATTCTTCTCACCTGAT, CTTTGCTCACAGAAACGTTTA, GCAAGGGAGAAGTTCTGTATA, GCGGCCTTATAACTGTGAGAT, GCTGGAAGTAAAGGTCACCTT, GTGCCATTTCTGCCATAAGAA, TACTTGGCAGTTGATGATATA, TGTGAAAGAGCTTCTACTATG	10	19136, 87117, 1731, 33814, 86267, 57624, 58429, 1308, 30509, 49908	0.06297	202	0.0201	306	0	0	2	2
Lass5	ACATACCCTGCTGCTTATTTA, CCTGCTGCTTATTTAATGGTA, CTTCTGCTACGGAATCAGATT, GACTTGTAAAGCCACTGGCAA, GATGCTGTTTGAGCGATTTAT, GCATGTGGAGATTCACTTATT, GCCTCCAACGCTCACGAAATT, TCGTATCTGTTACTAAGTATC	8	42745, 89143, 86331, 536, 22831, 3023, 34279, 2386	0.06334	203	0.0164	245	0	1	3	3
Cstl1	CATCAACTCGACACTCCATTT, CTCTTACAACAACGCAAGCAA, GACACCTACTTGTATCAAGTT, GCTGGTGACTGTGGTCGTAAT, GTATTTGGTTACTGTGAAGAT	5	2865, 2595, 46346, 60031, 87672	0.06337	204	0.0143	217	0	0	2	2
Csf2ra	CATCACACAGTGCATTGCGAA, CGCGTCCTGTAACTCTTCCCA, GAACCCTGAGACCCTCAGGAA, GCCCTGCTCTTCTCCACGCTA, GCGCTCCTGTATGCAGTGACA	5	649, 33701, 70156, 9253, 3521	0.0635	205	0.0143	216	0	1	2	3
Pkn2	ACGACATCAAGGATCGAATAA, CCAACAAGAAGACCTCTTGAA, CCAAGGTTCTTATCTACAGAA, CCAATGATGTTTGTGCTGTTT, CGGGAAGATGTTAGTAACTTT, GCTACAGGATAGCAAGACAAA, GGTGCTGTTGGCGGAATATAA, GTCCACGCAGAACCAGTATAG, TGTAGTTCTTGGGTTGCAATA	9	8498, 10664, 6752, 2120, 73301, 630, 66679, 8015, 43186	0.06355	206	0.0182	274	0	1	2	5
Anapc2	CCACGTACAGAGATTCTTCTA, CCCATGAATACAAACAGGTTT, GCATACATCCAGGCCATGTTA, GCGACAATTATTGCCTCCGAT, GCGACGTTCTTCAGACATCAT	5	3458, 53143, 6351, 26362, 890	0.06379	207	0.0143	218	0	1	2	3
Bet1	CCATGGGAAGACTGAAGATTT, GAAGCAAAGTAACGGCTATAA, GCTATGCCAATACTGGTTATA, GCTATGCTATATGATGCTGTT, GCTGAAATGGATTCACAATTT	5	77162, 86231, 795, 5361, 3504	0.06404	208	0.0144	219	0	1	2	3
9530077C05Rik	CATGTAGACCTGAAACTATTT, CCAGTCTAATGCTCTGCAGTA, CCATGTAGACCTGAAACTATT, CGGTTCTTCAAGTCGGACTAT, GCCTGAACATGAACTTGCTAA	5	466, 90162, 3616, 78290, 4012	0.06408	209	0.0144	220	1	1	3	3
Fpgs	CCAGTTTGACTACGCTGTCTT, CGAAGTACACATCTTGCTCTT, CGGATTCGAATCAACGGGAAA, GCACTTCTGGTGCCTCTATAA, GCCTTTCCACAGACTCTTATA	5	59687, 1975, 77936, 3138, 40801	0.0645	210	0.0145	221	0	0	2	2
Sertad1	AGCCTTCTGGCTAGCTCAGAT, AGGCACACAGGCACTGGAAAG, CCATGTACGACAGTGAACTTT, GAATTGACTTGGATCTGAGTT, GACAGTGAACTTTGGTTACCA, GTACGACAGTGAACTTTGGTT, TGGTGCTTGTGGTGAACACAC	7	2493, 60769, 85879, 25376, 39279, 1303, 39102	0.06484	211	0.014	213	0	0	2	2
Evi5	AGACACAGAACCAGATCAATA, AGGATAAAGTGTTGGATATAG, CACATTGTCAGCCATCTAATA, CCCGCTAAATTCTTGTATTTA, CGACAGCAAGTCAGAACCTTA, GAAGCCATTATGGGTTTGAAA, GCAGGATAAAGTGTTGGATAT, GCTGTGAATGAGTTACAGGAT, GTGAAGGAGCTTGTTCGTAAA, TGAAGTATGCTAATTGGTAAA, TTCCACCTACAACGAAGATTT	11	61013, 15858, 34, 43806, 2044, 4583, 28395, 9287, 25315, 89993, 22210	0.06578	212	0.0202	307	1	1	3	4
Stradb	AGCTCCTAAGGACCTACTTTC, CAGGATTTACATGGATATAAT, CCACCTGCATAGTTTGCTTAA, GCAAGCAGTTTGTTGTCCCAT, GCAGTGATTCTATCTCACTTT, GCCCACTGGATGTCAGTATTT, GTATTCTTCAAGCAGATGAAA, TAAGCTGTGACTGGTACTTTC, TCGGTCCTGTTAGGTACAAAT	9	175, 55317, 28345, 83710, 78398, 40969, 2360, 51063, 8547	0.06596	213	0.0194	297	1	1	2	3
Ids	ACAGCAACTTTGATGTTGCTA, CAAAGTGAACTAAGGTATAAT, CCACAACACAATTATTGCTTT, CCAGAATCTTCAGAAGCATTT, CCTGTATGACTTCAATTCCTA	5	41242, 42110, 37307, 2801, 2984	0.06656	214	0.0159	238	0	0	2	2
Srpk2	CCAAACAAAGACATGGTAGTT, GATCTCTTCAATGGTCGATAT, GCAGAGAGTGATTACACGTAT	3	5121, 822, 29149	0.06677	215	0.0077	127	0	1	1	2
Hist3h2ba	AGAGCCACCTTCCAAGCTCAA, CAAGGCCATGGGCATCATGAA, CCGAAGAAAGGCTCCAAGAAA, GCCATCACCAAGGCTCAGAAA	4	42420, 75870, 4265, 1032	0.0668	216	0.0109	165	0	0	2	2
Slx1b	CGTTTACGTTGGATTCACTGT, GATTTGGAGTTAGAGGAGGAA, GCTACTGTCTTCAGTTGCTTT, GCTGCAAGAAATCACTACTTT, GTTGGATTCACTGTCAATCCT	5	820, 10158, 3665, 53137, 18111	0.06691	217	0.0162	242	0	1	2	2
C1d	AGAGTCTACATGAACAGAGTT, CCCGTAGAAATTCACGAGTCT, GCTGTCTTGATATTCAAAGTA, GTTTCTGCATACACCTTAAAT, TGCTTCGAGATTTGTCAAGAA	5	3390, 1650, 86864, 25393, 86080	0.06694	218	0.0162	241	0	0	2	2
Obp1a	CATGGCCCTTTAACTTCTGAA, CATGTGGTCTTGACCTTGAAA, GCTGATAGAGTAGACAAGATA, GTCACCTGAGAACTTAACATT, TGCTGATAGAGTAGACAAGAT	5	68435, 16545, 3255, 15643, 2101	0.0672	219	0.0163	243	0	0	2	2
Sub1	CAAGCTCTTCAGGCAGTGATT, CCAGATTGGAAAGATGAGATA, CTGATATAGATGACGCAGTAA, GTCAGTGTTCGGGACTTCAAA, TGACGCAGTAAGAAAGCTGTA	5	54722, 20483, 63225, 3433, 1598	0.06738	220	0.0163	244	0	0	2	2
Hvcn1	CCACAGGTTTCAGGTCATCAT, GCAGCTCTTTCAGTTACTGTA, GCTGGTTTGTACCTCTCAAAT, GTGGAATGTCAACTACAAGAA	4	6014, 3534, 18806, 3376	0.06753	221	0.0111	169	0	0	2	3
Galnt5	CCATTGTGACAACAGAAACAA, GCCATGCAAATATCCCTGAAA, GCGATACATCAAAGCAAGCAT, GCTATCATTCAAGGTCTGGAT, GCTGACTGAATTTCTCTCCAT	5	3590, 73711, 45629, 1211, 16752	0.06785	222	0.0165	247	0	0	2	2
Atf7ip	CCAGGGACTTTAGTGACCAAT, CCAGTATAACTTGTGATCTTT, CCCGGACATGTGACTGTATAC, CCTCTCAAATTTACCTCTCTT, CGAGGCCCAATACAGATGAAA, GACAGAGCCGAGTAGCAATAA, GACGAACACTTAGACCAAATT, GATAACCCAGCCTCCGATAAC, GCAGCATGGAAGTTGACCAAA, GTGCCCAGTCCTAGTAGTATT, GTTAGACCTTGGAGTCGTTTA	11	66295, 23275, 64680, 37780, 73540, 2072, 166, 86209, 15896, 51325, 88145	0.06808	223	0.0219	333	1	1	2	2
Ttll8	CCTAACCATCTGGTTCTACAA, CGATGATATCCACGATGTGAT, GAGGTCAATGACTACCAACAT, GCCTTTCTGTCCCATTGTATT, GCGGTTATACCAGAGTCCAAT	5	84432, 3147, 2598, 33297, 13531	0.06818	224	0.0165	246	0	0	2	2
Hist3h2bb-ps	CAACTAGACATTATGCCTGAT, CAATGACATCTTCGAGCGCAT, CACCAAATACACCAGCTCCAA, CATGGGCATCATGAACTCGTT, CCGTAGTACAACTAGACATTA, CCTGATCCATCCAAATCAGCT, CGCGTTTCCGTAGTACAACTA, GAGCTACTCCATCTACGTGTA, TACGTGTACAAGGTGCTGAAG	9	10461, 21724, 2784, 75346, 1850, 30792, 43881, 1895, 3964	0.06851	225	0.0208	315	0	0	4	4
4921510H08Rik	CGTCGAAGAAGATTCGCAGTT, CTAACCTTTAGTCCTGCTCTA, GAAACGAAATGGAACCGATTT, GAACTGAGAAACGAAATGGAA	4	67648, 23172, 1496, 4238	0.06865	226	0.0113	170	0	0	2	2
Phf7	AGACAATCTTTGTGTCCATTA, CAGCAAGAAATGGGAATGTAA, CCCAGGACAGTGAGATACAAA, CCGAACAAGTGTTGAGAACAT, CGCAAGTGTATCCAGAAATAT	5	66, 41067, 50005, 76544, 4039	0.069	227	0.0168	251	1	1	2	2
Aqp8	CAACCATGTATAGTGGAACTT, CCATGCTGCTAATTCCCTATT, CCTATTGGATCTCCCAGCTAT, CCTCTTTGTAGGACTGCTCAT, CTGACAATGCTGTTGGTATTG, GCTCCTGGAAACCTGGAATTT, TCGGATGTCTATCGGTCATTG	7	1688, 54572, 8806, 35173, 16689, 2574, 5501	0.06948	228	0.016	240	0	0	2	4
Ccdc99	CAGAAGAGAATGGGAGAATTT, CGACTGAAAGCTGCACACTAT, GAGAGAATTGAAGTACCTGTA, GCCAACATTGAGGTCTTACAT, GCCATGATAGAACAGAAGAAT	5	5459, 90614, 4046, 48512, 144	0.06956	229	0.017	253	1	1	2	3
Trpm2	CCTTCTCATTTGGGCCGTTAT, GCAGAGTTTCTGATCTACGAT, GCATACAATCTACAATGCCAT, GCCCAAGATAATCATCGTGAA, GCTCATGGATTCCCGAGAATA	5	8305, 1187, 3721, 76834, 91234	0.06994	230	0.0173	255	0	0	2	3
Pla2g6	CGTATGAAGGACGAGGTGTTT, CTCCATGTCCATCTGACACTA, GAGACCGAGGTCTACATCTAT, GCACACCAAGATGACAGATGT, GTCGAAAGATAACATGGAGAT	5	3269, 53522, 2560, 55654, 25305	0.07004	231	0.0173	256	0	0	2	2
Letm1	CCTGTGTACCTCTGCTTCAAA, CCTTCCAGAAATTGTGGCAAA, CGCTCTCTTGAGTTCACCATT, GCCTGTAGTTGTGAAGCTCTT, GCTGAAATTGTGGCCACACTA, TGATAATAAGGACGGCAATAT, TTCATCATTCCACGAAGATTC	7	32196, 59904, 2722, 1345, 3019, 88426, 59463	0.07022	232	0.0168	248	0	0	3	3
Cts6	CCACAGTAATGTCATCCACTT, CCCTAGCACTTGATCCCAATT, GATATTCTAATGGAAGCTGTA, GCATTGCTACATATGCACATT, TGCAGCAATAATACTGTGAAT	5	21796, 3680, 4378, 1381, 27128	0.07035	233	0.0175	258	0	0	3	3
Got2	CCAATCGTATGCCAAGAACAT, GAGCCCTAGAAGACATATCAA, GCAGACCACATTACAGAAATT, GCTCCAAGGTTATCGCTACTA, GTTCTGTTTCACCGGCCTAAA	5	3875, 35632, 808, 50774, 39421	0.07041	234	0.0177	260	0	1	2	2
Plin1	CACTCTTTCTCGACACACCAT, CGAGGCACACATCATGTCTAA, CTTTCTCGACACACCATGCAA, GCTCTTCAATACCCTCCAGAA, GTAGACACTGTGGTACACTAT	5	36370, 38690, 2433, 3334, 84445	0.07043	235	0.0177	261	0	0	2	2
Nr2c1	AGATTATATCACCAGGACATA, CCATTGAAGTTTCCCGAGAAA, GCAACTATATTAGCAACGTTT, GCAGGTGTCAACCAGTTGTTT, GCCAGTGTGGTCACATCATTA	5	2258, 50483, 3400, 12487, 30611	0.07056	236	0.0178	262	0	0	2	2
Anapc5	CAGAACAATACTGAGTCCTTT, CTGAAGGATATGGAACAATTT, GCACTGTTTGAGCTGGCTTTA, GCCAAGAACTACTTTGCACAA, GCCCAGATATTACACTGTCAA, GCCGCTTTGTTGAAGAATGAT, GCTCATTACCTCAGCTACTTA	7	27336, 2890, 10429, 23867, 24601, 83123, 891	0.07059	237	0.0172	254	0	1	2	2
Acsl6	CTTACCCATTACTATGACGAT, GAGCGGAATCATCAGAAACAA, GCAAAGGAGAAGGAGAGATAT, GCCAGAGAAGATCGAGAACAT, TGCACGGTAATCGTCGATAAA	5	9144, 3377, 6252, 10261, 2336	0.07061	238	0.0178	263	0	0	2	4
Mrpl16	CCATATGACTTGACGCAGAAA, CCCTGAAAGGTCCAAGCTTAA, CCTCAGGGTACAACTTCTCTT, CCTGAACCAAGTTGCTCACAA, GCTTGACAATCAACCGCTTTA	5	83369, 3595, 37386, 63121, 1722	0.07083	239	0.0179	267	0	0	2	2
Cd274	CAGGCGTTTACTGCTGCATAA, CCGAAATGATACACAATTCGA, GCCACTTCTGAGCATGAACTA, GCGTTGAAGATACAAGCTCAA, GTTTACTATCACGGCTCCAAA	5	70376, 19154, 215, 21699, 4103	0.07093	240	0.0179	266	1	1	2	2
Artn	CCTCTGGGAGAATCCAGAAAT, CGAGCTGATACGTTTCCGCTT, CGCATTTGTGCAGCGAAAGAA, TCTCCTTCATGGACGTGAACA, TGGTGGCCAACCCTAGCTGTT	5	3258, 60106, 83266, 2753, 68574	0.07095	241	0.0179	265	0	0	2	2
Hus1	ACTCCTTCAAATTACTCAATA, AGACGTCTCCCTTCAGTATTT, AGAGTTTAGCATGCTCATTTC, CACGAGTCAGTAACATGATAG, CCAGACTGTGACGTCAGTATT, CCATAAAGGTTCTTCCGAGAA, CCTCTGACAGTGTCTCTCAAA, CCTGGCTTGTCTGAATCATTT	8	69898, 55214, 24372, 1606, 23466, 79131, 2355, 70053	0.07138	242	0.0203	310	0	0	2	2
Hist1h1t	CCCTCAAGAGACTTGTGAATA, CTCAAGAGACTTGTGAATAAA, GCAAGGGCAAGAAATCTGCTT, GCCAAAGGCTACGCCCACAAA	4	3899, 3095, 24115, 21749	0.07146	243	0.0125	184	0	0	2	2
Krt76	CCAGCAGAGAATGGGCTTTAA, CCGAACTTCTTTGCTCCTATA, CGCAAGCAGTTAGATTCACTT, GCGCAAGCAGTTAGATTCACT, TGGCAGTAAGAGTATTTCTAT	5	15453, 3632, 1728, 28982, 21884	0.0715	244	0.0181	270	0	0	2	2
Mettl22	CACACCGTTTATTGTACAGAT, CCTGGCAGACTATATCCTGTT, GACTTAACCAACGCTCTGTTT, GCCGAAGTGTTCTACGATGAT, GCTGTCAGATGTCCACCTGTA	5	9566, 49357, 3753, 41158, 1367	0.07151	245	0.0181	269	0	0	2	3
Sln	ACTTCACAGTTGTCCTCATCA, AGTTGTCCTCATCACCGTTCT, CCTCATCACCGTTCTCCTTAT, CCTCGTGAGGTCCTACCAATA	4	17677, 15411, 4144, 2380	0.07156	246	0.0126	186	0	0	2	2
Olfr1233	CAGATTTGATGTCAGAGAGAA, GACAAGGATGAACCACCACAA, GATCACCTTCACGATGCTATT, GATGCTTCTTATCATCTACAT, GTGCCATGCATTTATACATAT, TGCTGCAAATGGTGGTGTAAT	6	46351, 2874, 44565, 79885, 2456, 30930	0.07164	247	0.0176	259	0	0	2	2
1810026J23Rik	CACTGGTTCAGTCCGATGTTT, GAGAAGTACAAGCCGATCATA, GCCGACAAATTCTACTGTATA, GCGTCTCAAATTGGATTGTTT, GCTGTTCGAGGAGAAGTACAA	5	76535, 391, 40347, 45473, 4098	0.07184	248	0.0182	272	1	1	2	2
Alg9	CGTCTCATGGACCTGATCTTT, GCATCCTGTTAGAGCTGTAAT, GCCTTCCAGATACATTGACAT, GCGCCAATGTATATTTGGTTT, GCTGCATTTCATGCACGGATT	5	64000, 63701, 782, 33122, 4002	0.07242	249	0.0182	273	0	1	2	2
Spink14	CCTGCATCTTGTGTGTTGAGA, CTATGATAATCCCTGCATCTT, GCCTACACATGGACTTATTAA, GTTCTCCATTATGCTCCACTT, TCCTGGTAACAAAGACCTGTT	5	82829, 64417, 751, 4015, 19421	0.07247	250	0.0182	275	0	1	2	2
Hhipl2	CAACCGCAAGTTCTACATTTA, CCAACGCAACCTTCACTTCTA, GAAATCTTGCTGTCTACTGAA, GAGTGCATAATGCTGTCCATT, GCCACATGGATCTATTTACAA	5	3908, 48129, 16476, 55359, 1092	0.07258	251	0.0182	271	0	0	2	2
Oxnad1	CCACATAAGCAAGTTACAGAA, CTGAGAAGATTTCTTGCAGTT, GCCACATTTCAGATTGCCATA, GCTATGAGATAGGGACAGTAA	4	1511, 86985, 10481, 4510	0.07266	252	0.0133	200	0	0	2	2
Crkl	ACTCTGTCACATGCAAGTTAC, CCCAACTTACCTACAGCAGAA, CCTGGACACTACCACCTTAAT, GAATATGTACGGACCCTTTAT, GCATTGGAGGTTGGTGACATT, GCCTACATACATACCTTGTAT, GCTGAAGACCTACCCTTTAAA	7	17342, 80851, 3186, 44874, 25386, 8261, 299	0.07278	253	0.0188	289	1	1	2	3
Ppp3ca	CACAGAGTATTTCACGTTTAA, CGCCAACCTTAACTCCATCAA, GCACAATAATTTGTTGTCCAT, GCCAGGAATTGGATTCAGTTT, GCTGGAAGAAAGTGTTGCATT	5	1921, 3649, 31784, 3815, 13120	0.07288	254	0.0183	276	0	0	3	3
Gng8	AGTGAACATCGATCGCATGAA, CTGAAGCTGGAAGTGAACATC, GAAGCTGGAAGTGAACATCGA, GCAGCTGAAGCTGGAAGTGAA, TGGAAGTGAACATCGATCGCA	5	20627, 1141, 26043, 3912, 79103	0.07293	255	0.0183	277	0	0	2	2
Spint2	ATCCGTGTGGTTCGCAGAAAG, GAAGAACACCTGTGTCTTGTA, GCTGGTACTATGACACTGAAA, GCTGTTCCTCATGGTTCTGAT, TGCTTGCGTCTGAGATCATTA, TGGTGGTACAATATCACTGAT, TGTGAAGGCAATGGCAATAAC	7	64858, 89114, 1775, 2701, 76138, 57152, 40912	0.07293	256	0.0188	290	0	0	2	2
Olfr76	CTACTCATTTAGCAGAGACAA, CTCATCAGTAACCATGTTCAT, GCATCTATCTTGTGACCTTGA, GCTGATCTCCTACAGTTACAT, GTCATTTCTCATCCTGCTGAT	5	59447, 18998, 89, 4270, 20960	0.07305	257	0.0183	278	1	1	2	2
Mtif3	CCACGTTCAAGTCACGATAAA, CGTCACTTGAGCAAGAAAGAA, GATTTAGACACCAAGAGTAAA, GCCACTTACTTTGAGCTTCAT	4	36511, 4069, 2943, 88843	0.07319	258	0.0135	207	0	0	2	2
Max	ACCATTGAGAAGACTCTTTAT, ACGTAGGGACCACATCAAAGA, CACTGGAGAAGGCAAGATCAA, CCCAAATCCTAGACAAAGCAA, CCCTCCTTTGTAAGGATTATT, GCAACAGAGTATATCCAGTAT, GCTCACCATAATGCACTGGAA, GTTTCAATCTGCGGCTGACAA, TGCCCAACTGCAGACCAACTA	9	58070, 12272, 2466, 674, 12482, 28694, 24991, 75289, 49305	0.07339	259	0.0229	349	0	1	2	2
Rph3a	CATTGGCAAGTCTAATGATTA, CCATGACAAATCCAGAGGAAT, GACATTGGCAAGTCTAATGAT, GAGATCATCAACAGAGTGATT, GTGTTTGAAGAACAAAGACAA	5	1335, 40828, 3885, 8057, 31612	0.07357	260	0.0186	280	0	0	2	3
Sema6d	CGGTTGACTATCACTATTCAA, GCAGTCTATAACAGACATAAT, GCCACCAAACACGGATACAAA, GCCACCAACAAACTATGTTAA, GCCATAGAATATGGAAACTAT	5	69045, 48698, 3960, 1146, 19475	0.07377	261	0.0186	282	0	0	2	2
Sspo	CCTGGGAGAAATGCAGTGTTT, CGACAATCTACAGTGGCACAA, GCACCAGTTTGTACCATTATA, GCCCATCTAGTCACCTATGTT, GCGATCTGCAAAGACACTGAT	5	59154, 2690, 16499, 61836, 3451	0.07387	262	0.0186	283	0	0	2	2
Mep1a	CCAAACATCTTCAGCTATAAA, CCATACATTCTGGCTGACAAT, CCCTACCATTACTACCAAGAT, CGGGATGATTATGTGAACATT, CGTCACATTCTCTACCACCAA	5	2696, 69808, 48898, 73402, 3449	0.07387	263	0.0186	284	0	0	2	2
A730085E03Rik	GAAACGAAAGCTCAGCTTGGA, GAAAGCTCAGCTTGGAATCCA	2	5732, 4405	0.07399	264	0.0054	99	0	0	1	2
Ddi2	ACTGGCTTCTTACGGTTTAAA, AGGAGCCCAGATGACTATTAT, GAGGAAATTGCAGACCAAGAA, GCACACAGAAGATTATTGGAA, GCACCAGTGTTCTATTGACTT, GCAGACCAAGAATTAGCAGAA, GCTCAGGCAAAGATAGAAGAA	7	32761, 67381, 1841, 2727, 51143, 87534, 74650	0.074	265	0.0192	295	0	0	2	2
Lipe	CCCTATCTTCTCCATCGACTA, CCTACTACACAAATCCCGCTA, CGCAGAAGACAATATGGCCTT, CGCATCATACAGAACCTGGAT, GCTAGATGACTCGGTCATGTT	5	3646, 79157, 56781, 2140, 68646	0.07407	266	0.0187	286	0	0	2	2
Zfp346	AGATGCTAGACCCAGACAAAT, AGTGAAGAGATACCTAGCAAT, ATGGCTCAGCAACATTATATG, CCTCTCTTATATCCGAAGAAT, CTCAAACTCATGGCACACTAT, GAGGCTAGACTCAGATCAGAA, GTCTCAGAAGCTGGCGCATTA, GTGCAGGCTTGCTAGGTATAG	8	2361, 37190, 68408, 66579, 90341, 1915, 77822, 75897	0.07408	267	0.0219	332	0	0	2	2
Qk	ATGTACAATGACACGTTAAAT, CCTACAGAGACGCCAACATTA, CCTAGAGGACTTACAGCTAAA, GAGCATCTAAATGAAGACTTA, GCACCAGCTACATCAATCCTT, GCCTTCAGATAGTTGAGAATA, TCAATCCTTGAGTACCCTATT, TGCCAGTCATGCCTGATATTT, TGCCTGATATTTCAGCCCATT, TTATAACACGACCAGTCAATG	10	15125, 2057, 40165, 74096, 1480, 17230, 78352, 39578, 49209, 15580	0.07411	268	0.0263	392	0	0	2	2
Nudt1	GAAATGTGAAATGTCACCAAT, GAAGAAGTTCTGTGGGCACTT, GCCCACAGAAAGTGAAGAAAT, GCCGGATGACAGCTACTGGTT, GTGGATACACTGCACAAGGTA, TCACCAATACACCAATGTTTG, TGAGCTGATGGACGTGCATAT	7	39217, 51509, 21592, 2404, 2546, 5301, 58192	0.07414	269	0.0192	294	0	0	2	3
Gm16516	CCCAAACTCTTCCATGTTCTT, GACCATGTTCTGATGGTCGTT, GCTGACTCAATGCTGTTTCTA, GCTTGCATTCCAGCTCCATAT	4	2866, 30443, 38163, 4176	0.07437	270	0.0137	211	0	0	2	2
Sltm	CCACCACCAAGAAATGAACTT, CGCATTAGAATAATTCGTGAA, GAGAGAACATTTAGTTCGTTT, GCATGATAACCCAACACTCAA, GCTACCATGACACAAGACGAA	5	77050, 57017, 48722, 2508, 3543	0.0744	271	0.0187	287	0	0	2	2
Trib3	AGAGTACACCTGCAAGGTGTA, CCGTTGGAGTTTGATGACAAT, CCTGGAAGATGCCTGCGTGAT, GATACCCATTCCACGACTCTG, GCGTCGCTTTGTCTTCAGCAA, TCTCGGCTCCTTTACATCTTT, TTGGAGTTTGATGACAATATT, TTGGGCCAAGCTAAACCTTAA	8	591, 62853, 76446, 2816, 20887, 61769, 78373, 17747	0.07441	272	0.0224	343	0	1	2	2
Dhx37	CAGTGGTGAATGCTTCAGGAA, CCCTTCTTTGTGACTGTTATA, CCGCTACAAATACTTTGCAAA, GCCTACAAGACTCCTCTTCTA, GCTGAAATACAAGGTGGTGAT	5	67959, 3510, 45876, 2645, 54136	0.07462	273	0.0188	288	0	0	2	2
Gm19505	CCACCTTTGTCACCAATTCTT, GTCCTTTGCAACCTGATCACA	2	6540, 2167	0.07463	274	0.0056	100	0	0	1	2
Aox1	CCCTTCGAATACTTTGTGTTT, CCTGTGGGTATTGGATCAGTA, CGGAAGATTCTCTTGAGGATA, GCCCATAATTGATGCCTGCAA, GCTGTTTGGATCAAGAAATAA	5	19164, 20855, 68862, 3812, 1780	0.07485	275	0.0189	291	0	0	2	2
Arfrp1	ATGCCTAGGCCTGTTAGTTAG, CCACTGATGAAGAAAGGCTGT, CCAGAAGGATGAATACTGCAT, CCATGGTGTCATCTATGTAAT, GCCTGGTTCAAAGTGGAATTT, GCTTACCTCACTTGGAGAAAG, TCCTGACATCAAGACTGCATT	7	30653, 44713, 2769, 49169, 1848, 62233, 36431	0.07498	276	0.0199	303	0	0	2	2
Mxd1	ACGGAGGAACAAGCCCAAGAA, AGTAGCAGATCAACTCACAAT, CAACTCACAATGAAATGGAAA, CCACCAAATAGACCAGCTTCA, CTGTGCCTAGAGAAGCTAAAG, GCAAACCTCATGTACCACCTT, GCACCAGTAGCAGATCAACTC, GCCTAGAGAAGCTAAAGGGAT, TATGCCTCCATGCTGCCATAC	9	89918, 73421, 5605, 36318, 45146, 2728, 83, 91180, 73096	0.07516	277	0.0242	361	1	1	2	3
Gm5460	ACAGTTGTCCCAGGCCATTTC, GACACCACAGAGGCAATATTG, TGCTGTACCTGCTATGATGTG, TTGTACTTGCATGCCAAATAT, TTTGCTCAGCACCGTGGTACT	5	7085, 50054, 3542, 2647, 55156	0.07517	278	0.0191	293	0	0	2	3
Efcab1	CTTTGAAGTGTTTGATCTGAA, GAAGGGATTAAAGATTTGGTT, GACATGATTATGGACAGAGTA, GCAGTTCACTTGTATGTATTT	4	61538, 52059, 4777, 1239	0.07522	279	0.0142	214	0	0	2	2
Moxd1	CCGTACTTTGATCTGGTAAAT, CCTTCAACAAGCTCGTTCTTA, CGGTTACTGAATCCTGAGAAA, GCACATCAAGTGGAAAGCAAA, GCCAAATGTTTAAGATTCCTA	5	582, 48215, 46167, 4237, 51642	0.07529	280	0.0191	292	0	1	2	2
Prok1	CACCCAGGAAGCCACAAGATC, CACCTGCTGCGCTATCAGTCT, GTGAACGAGATATCCAGTGTG, TCATGCTCCTTCTAGCAACGG, TCCGACTGTGCGGTCATCACA	5	59827, 3421, 60617, 88548, 3118	0.07578	281	0.0193	296	0	0	2	2
Setd1b	CCAGATTGATTCAGACATCGA, CCAGCTCAAGTTTCGAAAGAA, CCAGTGAAAGTTCTGGATCTT, CCCATCCTCTTCAGGGTTAAT, GCAACTTTGCACGCTTCATTA	5	1304, 17245, 42443, 4028, 17086	0.07582	282	0.0195	298	0	0	2	2
Klhdc7b	ACAACCCTCTGACCAATATTT, CCACATACTCTGAAGATATAC, CTCGTGCTACCCAGCCTTTAT, GGTATTGGGCAACACCATTTA, TCTGCACTATGCATAACTATC	5	21728, 4423, 77175, 139, 41670	0.07594	283	0.0197	300	1	1	2	2
Hopx	AGTACAACTTCAACAAGGTCA, CAGAAGGCTTGCCTTCGGAAT, CCTTCGGAATGCAGATCTGTT, GATCCTGGAGTACAACTTCAA, GCAGACGCAGAAATGGTTTAA	5	58426, 30301, 2770, 3551, 61017	0.07602	284	0.0197	299	0	0	2	2
Ces2h	CCTCTGATGTAGTCTATCAAA, CTCCAAGCCATCCCATGTAAA, CTTAACATCTATGCACCAGAT, GTTTCTCCAAGTGCAGTTCAA	4	4483, 69119, 2326, 88560	0.07621	285	0.0146	222	0	0	2	2
Slc5a7	CCCTGGTTATTACTCTGACAA, CCTCATTCTTTACCAACATTT, CCTTATATTTCTGGTTGGAAT, CTAACCCTCAGTTCAACTTTC, GCCATATGCATAGGAGCTATT, GCCATCTGTAAAGAGAGATTT, GGATATTCTCTGAGTCTAATT, TTATCTAGCCAAGTATCTATT, TTCTATGTTTGCTCGGAATAT	9	21136, 2412, 76388, 56014, 83627, 56059, 16967, 38569, 1153	0.07627	286	0.0249	369	0	0	2	2
C87499	GAAGTTACTATGGATGGTGAT, GATTTGTTTGACGAGAAGAAA, GCAAGTTGATTTCTCAGCTTT, GCAGAAGGAAATATGATAGAA, GCATTAAATGTCGTGGCTTCT	5	2230, 38913, 23144, 35013, 3762	0.07655	287	0.0199	301	0	0	2	2
Fastkd2	CCACCAATAACCTTGGAAGAT, CCAGCTTATCAAAGAGAATAT, CGTGAAGAACATCGTTTCTAT, GTTAGATACCTCTTTCAGGAT	4	4890, 34432, 26251, 1183	0.07659	288	0.0147	223	0	0	2	2
Dlg5	CCACAGGCTGAATCCTGATTA, CCTGAGAAACTCTCTGTGTAT, CCTTTACTGGATGTGGTGAAA, GCACTGGACAATAAGTCTCTA, GCATTGCTGATGGTCGCTTAA	5	1817, 23239, 3902, 85398, 39516	0.07659	289	0.0199	302	0	0	2	2
A830005F24Rik	CAGTTCAAAGGACAGTACGAA, CTTTCTTGTTTCACCTAGGAA, GAGCCTTTCTTGTTTCACCTA, GCCTTCAGAGTTGTACATAAT	4	42481, 35182, 2835, 4358	0.07686	290	0.0147	224	0	0	2	2
Abhd14b	CCATCATTAAGTGGCATGTAT, CCGCTAGATTTCTCTTACCTA, GAGACTCAGTCCTGATGATAG, GCATCCCTGTTACTTGGACAA, GCCATTGATCTGCCAGGTCTT, GCTCCTATCTGCACAGACAAA, TGAAGACTCCAGCTCTCATTG, TGCTGCATGGTATCCGCTTCT	8	282, 56449, 20056, 35117, 31241, 14839, 3031, 12016	0.07718	291	0.0241	360	1	1	2	2
Wrb	AGTGTTGCTTTCTACATACTA, CGTCAACATGATGGACGAGTT, CGTCTGATGTAGGTCTGGATT, GCGCTGATGATCTCGCTCATT, GTTGCTTTCTACATACTACAA	5	3943, 16754, 47081, 20049, 1804	0.07721	292	0.0203	308	0	0	2	2
Zdhhc21	ACTCTTCTATACACAACTGAT, CATCACTATGTTAGTTGGAAT, CCCTTCTTTCTCCTTCTCAAA, CCTCCTTAACTGATCCTGGAA, GCTTACTTGCTACGCACTGAT	5	1605, 16868, 30655, 71506, 4013	0.07727	293	0.0203	309	0	0	2	2
Catsper3	CCAAGATGTTATTGTCAGCAA, CCAGTCTCTACGAATCCTCAA, CCTTGCGATTATGGAGGAGAA, GCAAGATTAAGAGGAAGGATA, GCTCACTGTTTGCTACAGCAT	5	16106, 15395, 61861, 2379, 3773	0.07758	294	0.0206	311	0	0	2	2
Fa2h	CAGCCATTACCTCATCATGTT, CATCACTTCGAATACCAGAAA, CCTATGTATTGAGCTTATGTA, GCATCACTCACAAGAGAGTAT	4	73994, 79493, 4972, 1155	0.07764	295	0.015	225	0	0	2	2
Slc26a6	CCTGGCAGTTTCCATAGTCTT, CGTCTTCATCTACTTCCTGTT, CTGTCATTATTGTGAACCTAA, GACACTTCTTTGATGAATCTA, GCGAATGAAGAAAGCCAAGAA	5	76934, 61276, 25828, 3645, 2790	0.07773	296	0.0206	312	0	0	2	2
Olfr972	CTGATACTATTCAGTTCTCAA, GAGTTCAATCTTGCTGGTTTA, GATTTCTGTAACGCCAATGTA, GCCAGCATCCTCCAGATTAAA, GCCATTTGTAAGCCCTTGCTT, GCTATCTTCTTTGGTTCCCTT, GCTGTTGCTATCTTCTTTGGT	7	3316, 81218, 23973, 585, 15848, 73490, 62574	0.07777	297	0.0208	316	0	1	2	2
Tmprss11bnl	CCGGCTATTTCTGTCTTCTAA, GAGAGTAACTTCCTACCGTAA, GCAGTTATAAAGCTCACTGAA, GCCTACATGCAGCATTCTGTT, GCCTTTCAGAATTCTAACATT	5	33717, 2066, 44935, 3893, 19766	0.07784	298	0.0206	313	0	0	2	2
Ndufa8	CCTTGATTACTCCAACATGCA, GAACTTCTTCAGGCAGATAAA, GCAGTTGTCTAAGGTCACCAA, GTACTGGACTTGCCTTGATTA	4	4958, 1282, 38782, 48120	0.07805	299	0.0152	227	0	0	2	2
2810433D01Rik	GCCAGAGCTATGATACTAAAT, TCCTGCATGTTGAGGAAGGAA, TCTCAGGTCCTTACCTCATAA	3	148, 83095, 6280	0.07833	300	0.0109	167	1	1	1	2
Fkbp3	CCATTTGGTTAATGCCTATAA, CCCAAAGACTCCAAGTCTGAA, CCCTTTAAGTCTCAGATATTT, GCAGAGCATAAATTACTGGGA, GCGCTCTTGACTATGAGTAAA	5	3854, 51598, 43410, 49124, 2321	0.07863	301	0.0211	319	0	0	2	2
A530064D06Rik	CCTAGAGTCATCATCATAAAT, GATCCTAGAGTCATCATCATA, GCAAATAACACGTCAGTTTAT, GCCCAGATTAAGAACATTTAT, TGCAAATAACACGTCAGTTTA	5	37473, 3776, 90981, 2557, 43020	0.07864	302	0.0211	324	0	0	2	2
Ptpn21	CCGCTTTCTCTCAGGAACTAA, CCTCAACATTGGCAGTTCCTA, CGGAATAGAATGGGATTATAT, GCACTAGAGCTGGCAAATAAA	4	23180, 223, 48720, 5354	0.07867	303	0.0153	228	1	1	1	2
Olfr1254	CAACTCTTTGTGGAACACTTA, GCAATCTGTATGGTGGTGTTT, GCCTGTGATATGTATCCATTA, GTTATTCTGTTAGCCTCCTAT, GTTCTCTTTGTTTACGATCTT	5	1122, 31633, 4261, 39807, 26947	0.07875	304	0.0211	323	0	0	2	2
8430406I07Rik	CGCTAGGGTTTGGGTATCTAT, GCCCAGTCTTTGAATTGAGAT, GCTACATTAACACAAGCTGAA, GCTTAGCAGGTTAAACAGATT	4	14065, 26418, 4816, 1876	0.07886	305	0.0153	229	0	0	2	2
Papola	CAACAGAAGGAGTCAAGTTAA, CTATTGAAACAGCCTGAAGAA, GAAGAGGCATTTGTACCAGTT, GTCAAGTTAACAGCTCTGAAT	4	52208, 3452, 79061, 4306	0.07908	306	0.0154	230	0	0	2	2
Tas2r123	ACCTTGTATGTGGAAATAGTA, CCTAGGAGATCAGAAATGCTT, CTAGGAGATCAGAAATGCTTT, GATACTGATATTTGACCACAT, GCTCATCTTCTCACTGTGGAA, GTAACGGGAATCTTAGGACAT	6	1805, 41163, 3475, 7389, 58583, 16672	0.07909	307	0.0211	320	0	0	2	3
4931409K22Rik	CACTGTTTGAAGAGCTTGTTA, CTAGTCATATTCTACAGTCTA, GCACAGCTACTAGTACACATT, GCTCCTTCAACTTATCAAGAA	4	37634, 5039, 1263, 47935	0.07913	308	0.0155	231	0	0	1	2
Nudcd2	CAATTGCTGATGAAGGAACAT, CCTAAGTGATTATGTCAAGAA, GCAAACTGTTGGACTTCTCTT, GCAAGACCAAATGCAGAGAAA	4	4585, 44575, 2643, 26545	0.07922	309	0.0156	234	0	0	2	2
Vmn1r179	CTCTATGTGTACGCTTGATAA, CTCTCTATGTGTACGCTTGAT, CTTTACTACCAATCGACACTA, GACTAGAGCAACCAGTACTAT, GCAGCATATCTTTACTACCAA, GTCCACAGATAGCAGACAATA	6	56493, 35689, 3022, 60872, 36612, 3078	0.07926	310	0.0211	321	0	0	2	2
2810422J05Rik	ACCCTATCCCACCCAGTATCA, CACATCCCAGAGGGTTCATTC, CATAGGCAGGATTCCTAATTC, GATGATGTCAATGCCATAATC, TGAGCGCTTCATGCACCATAC	5	3817, 18649, 68186, 2562, 29082	0.07936	311	0.0213	325	0	0	2	2
Acot11	CCAAAGTTTCAGATTCCTAAT, CCTGACATTCAACAGAATTTA, CTATGTTCTCTAATCGCACAT, GACACCATCAAAGATCTCCTA, GATGACTAAGGTTTCTTACTA	5	83146, 3866, 89884, 57377, 2415	0.07936	312	0.0213	326	0	0	2	2
Capn9	CCATCTCAACATAAACGAGTT, CCGAAGCAAGACGTTCATCAA, CCTGAGAATCTTCTCTGAGAA, CGAACATCTCTTGGTCTCATT, GCCAAGCTTAACGGGAGTTAT	5	67646, 1547, 34308, 6881, 4161	0.07946	313	0.0214	327	0	0	2	3
Iqsec1	AGACATCAAAGTGCTAATAAA, AGACGCTAATTGGGATCTATG, ATTACCGAATTGGCCTAAATC, CAACTCCAATGACACCATAAA, CCAGTGTTACTGTTGGCAAAT, CCCTTTCAGATTGGAAGGAGT, CCTTTCAGATTGGAAGGAGTT, CTGTCAGCATGGCTCATCTTT, GAAAGAGAACTGATCACCATA, GTGATGAAATACGTAAGTAAA	10	30184, 52743, 80893, 18720, 2502, 27765, 65121, 49271, 4861, 709	0.07957	314	0.0291	417	0	1	3	3
Thap7	CCACAGACTTCCCAAGAAAGA, GAAGGACCATGTACAGGACTT, GCTCCAAACACTTCGAGGAAA, GCTGGCCAAATGTTACAATAA	4	468, 72385, 5335, 50977	0.07958	315	0.0158	235	1	1	1	2
1300017J02Rik	CCACAGCCTGAAACCTATCAT, GCACCTTTGGAAGGTTATTAT, GCTCTTTGGAAGAAATGGATT, GCTGTGGTTAAGAAATCGGAT, TGTTCTAGTTTCCGTGACAAT	5	3685, 88606, 3002, 85416, 74616	0.07961	316	0.0215	329	0	0	2	2
Trpd52l3	ACTGGAGGAAGAGATCTTAAA, AGGGCTTGATGAGCAACTGTT, CAACACCTACATGAAGCAGAA, CCCAACTGTTTCTCCTCAAAC, CCTCAAACCAAGGATTGGACT, GAGCTCACTAAACTGGAGGAA, GCCACTAATTGTTACTCTAAA, TGAAGCAACCTGGCTAGATAT	8	7686, 54102, 2996, 19903, 58455, 5134, 701, 8087	0.07976	317	0.0258	380	0	1	2	5
Col6a4	CCAACGAATTTCACCTGTTTA, CGGAGAAGGATTAAATTCTAT, GCCAAATGTTACGGAGACGAT, GCCTTCCTGAACCTTCTAAAT, GCTGACATCATCTTCTTGATT, GCTGTAGAAGAATGTCTAGTT, GCTTTAGACTTCCTGAGGAAA, GCTTTCAGTTTATCACCGCAA	8	29880, 24114, 54329, 2601, 35623, 12047, 39615, 1893	0.07982	318	0.0259	381	0	0	2	2
LOC665755	GCCAACTGGAACAAGATGAAT, GCCTCTCTGGAGTGCTATAAT, GTTCGTTTCTATCTTCTCCAA	3	118, 6413, 19985	0.07986	319	0.0113	171	1	1	1	2
Wwp1	ACAAGAATGGAATAGTGCAAA, CACCACACTTTAAAGGCAGAT, GAGTTTGGAGTCACCACACTT, GCAACAGTGGACTTGAAACAA, TGCTGTTAACACACAACAGAA	5	40213, 82647, 3556, 3440, 90872	0.0799	320	0.0215	328	0	0	2	2
Pmm2	CAACTGGGAAATGATGTGGTT, GAAGCTATTGTGTAAGCAGAA, GCCAAGAAGAACGAATTGAAT, GTGGTTGAGAAATACGATTAT	4	30965, 5119, 27682, 1196	0.07997	321	0.0158	236	0	0	1	2
Mrpl24	CCGATACATTGGCAGAACCAA, GAACACGCATTACCGATACAT, GAGAACGTGTTCGAGTCTCTA, TGATGAAGACTGGCACCTATT	4	4480, 39777, 3137, 31247	0.08008	322	0.0158	237	0	0	2	2
LOC100862480	CCAACATTATCCAGAGATATT, CCTGTGGGCTTCCAACATTAT, CGCATATCTTCAGTGTCACAT	3	5456, 3116, 33524	0.08038	323	0.0115	172	0	0	1	2
Rpp38	CGAAGCCAAGTTTAAATTGAT, CGTCATTTGATGACCTTACAA, GAGAGAGAAGACATACACTTT, GATATTGAGATTAGCGAGGAT, GCTCATTCCCAACCCTAGTAA	5	63527, 6278, 615, 79396, 4534	0.08052	324	0.0218	331	0	1	2	3
Athl1	ATCATGACACCATCCATATAA, CAGAACTTCCACCCTGAGTTT, CCAGAGTATCTGTCTCTGGTA, CCTGCATGGCCACGTACTTAA, CTTTGAACTTCCTAGTCTTTG, GCTTTGAACTTCCTAGTCTTT, TGGGACCCAGGAGATCCATAT	7	49896, 20857, 64399, 67434, 3633, 63, 66170	0.08094	325	0.0227	348	1	1	2	2
Olfr1112	CATTGCTCTATCCTCTCATTA, CCCACCTTATAGTTGTAGCTT, CCTGCAAACTCCCATGTACTT, GCCAAGGTTATTAACAGATCT, GTTCCCAACTTGCAAGAATTT	5	3698, 67765, 81765, 9425, 3236	0.08116	326	0.022	334	0	0	2	3
Cd93	CTCCTGTAAAGAGGGCTATAT, GCAAGCCGACACATGAAGATT, GCCCTCAGTAAGAACATAAAT, GCTCCAGGTAACAGCATTGAA, GCTTATTCAAACTGGTACAAA	5	4452, 77356, 8610, 25242, 996	0.08128	327	0.0222	338	0	1	2	3
Nfkb1	CACTGCTTTGACTCACTCAAT, CCCACTGCTATCTCTGAACAA, GCACCATAAACACCAAATTTA, GCAGGGTCACTCGATTTCATT, GCAGGTATTTGACATACTAAA	5	48242, 5985, 519, 60886, 4616	0.08137	328	0.0222	337	0	1	2	3
Ezh1	ATCACCGCATTGGGATCTTTG, ATCGTCGAGGGAAGGTCTATG, CATCGAAGAGCTGATCAATAA, CGAGGGAAGGTCTATGATAAA, CGGCACCTATTTCAACAACTT, GATGGTGGGTGTGGGATAATG, GCACTGGTTCCCATCATGTAT, GCCTAACGATAGGCTCTGAAT, GCTGTAAGACTCAGTGCAATA	9	18087, 70147, 211, 2914, 81570, 62500, 25735, 83417, 61188	0.0814	329	0.0285	412	1	1	2	2
Slc1a7	CCACAGCATGTGTGTTGGTTT, CGCTTCCGAACCATGATTAAT, GCCTCTCACCACAGGAGATTA, GCTAGACTTTGGACAGATCAT, GTGCCTTAATGAGTCTGTCAT	5	17945, 15854, 4445, 1058, 16300	0.08151	330	0.0223	341	0	0	2	2
Ceacam9	CCGTTCTGTTTGTGCATGAAA, CCTGTATTTCAATGACAGGAT, CGGAAATGGAAAGCGAATTAA, CGTTCTGTTTGTGCATGAAAT, GCTTAGGTTCTGAGTTGAATA	5	4292, 86803, 41862, 1521, 6320	0.08154	331	0.0223	340	0	0	2	3
Pdha2	ACTGCTGTCATCTCTGAAGTT, CAAGTATAAGTCCCACAGTTA, CCGTTATCATGGACACAGTAT, GCAGGTATTCGAAGCATACAA, GCTGTGGAAGATATAGCCAAT	5	3596, 29286, 3610, 78979, 30830	0.0817	332	0.0224	344	0	0	2	2
Slc16a4	ACAGACTTACACAGGCTCTTT, CCACAGCCAATCAAACAACAA, CCACTGGCTGAAAGATGGAAA, GCCTTATTTAGTGACAAGAAT, GCTCTTTAGAAACCCTTTCTT	5	3739, 92102, 89915, 7970, 3235	0.08185	333	0.0224	342	0	0	2	3
Olfr1230	AGTTGATTGTAGACTCTCTTT, CCAAGATTCCAGAGCTGAGAA, CTTATTCTCATCACTTCCTAT, GAGAATACTATTCTCTGCTTT, TGTTGTTCTTTGTACCTTGTA	5	1441, 17572, 50353, 40400, 4346	0.082	334	0.0224	345	0	0	2	2
Calm5	ACCTCTCACATGAGGAACTGA, CCAGGAACTTGGAGATGTAAT, CTCATCTCCAAGTTGGACACA, GATGGCAAGATCAGCTTTGAA, GCTCAAAGAAGGCTTGTCCAA	5	80282, 56676, 57867, 1100, 4476	0.08228	335	0.0225	346	0	0	2	2
Adamts18	CCACGTTTGAATACCAGCGTT, CCCAACAGTGTGCAGAGTATA, GCCCAAGATATGCAACGCTTT, GCCGACAGTATCTAAAGAAAT	4	41965, 5388, 887, 48542	0.08237	336	0.0168	250	0	1	1	2
Ankrd36	CCAACATAAACGCCCTGGATA, CTGCACAAAGTTACGCTGTTT, GCCAACATAAACGCCCTGGAT, GTGCAGAAGATGCTCGAATTT	4	11293, 86377, 3503, 4521	0.08245	337	0.0168	249	0	0	2	2
Mrpl42	ACAGTATCACAATCGTCGTAA, ACGGAGCTTTGTCTAGTGCTT, ATCAAACAGAACTATCTGGAA, CAGAACTATCTGGAAGCATTT, CCAGATCTTCTGCATAATAAT, CGGCAGGACAATAGTGTGCTA, CTACGAACACACCAAACCCAT, GCAGATCCTGAAAGCCAAGTT	8	42843, 5857, 92137, 21783, 1417, 71034, 35074, 2880	0.08279	338	0.028	406	0	0	2	3
Pbsn	CCTTGGCAAACAATTTACTTA, GAAGTTTACTATGCACAGTAT, GATTAGCATTACAGATGACAT, GCAACCAAGTCTACCTCTATT, GCCTTGGCAAACAATTTACTT	5	80698, 1991, 28596, 4213, 45943	0.08286	339	0.023	350	0	0	2	2
Olfr829	CAACACTCTTATTGACAACAT, CCAAACGGTTGTGTCAGGATT, CCTTGCAACAGTCATAGGAAA, GCTCAACAATTACAGAATCAT	4	29988, 25757, 1424, 5251	0.08298	340	0.0169	252	0	0	1	2
Uvrag	ACATCGCTGCTCGGAACATTG, CCAGATCAACAATCAAAGATA, CCCTAGATATAAATCCTGTTA, CCTACATTTACCCTATTGATT, CGCAACCAGAATGAAATCATT, CTGTCCTACATTTACCCTATT, GAATGAGAACAAGGATTATTT, GGCATTTGTCTGCGGTTTATT, TCTCAGAGCTGTCCTACATTT	9	2509, 78189, 68387, 89291, 44544, 62481, 1655, 12953, 20894	0.08348	341	0.0301	434	0	0	2	2
Gga2	AGTTGCTCCCAGGCTGCTATT, GCCATCAAATTTATGGCTTTA, GCCTTAGGAATCAACGATGTT, GCGGAGATTCTTCAAGCAAAT, GCGGTATAAGCTGACTTTCAA, GCTTCTGACAAGACTTCTCAA, TCATCTCTGCTGCACTCATAC	7	12981, 78650, 3036, 31066, 91373, 2214, 49654	0.0836	342	0.0246	365	0	0	2	2
Nosip	CCTGGAGTGTGTTGAGAAACT, CCTGTATGAGAGGGAAGCGAT, CTACACCTACCACGAGAAGAA, GACCAAGTTAGAGGCTTCCTA, GCTTCTGGATTCCCTCACTAA	5	47558, 1135, 4544, 39486, 23972	0.08363	343	0.0235	354	0	0	2	2
Nlgn2	CGCAGTAGTCATGACCTATTG, CTGAACGCATCACTATCTTTG, CTGATATTGACCTAGGCCCAA, GCAAGTTCAACAGCAAGGAAA, GCAGTATCTGCACATAGGCTT, GCCCATGTGAAGACATGCTTT, TTTGCCTCCTCCAAGAATTTC	7	3003, 74496, 84609, 36867, 31362, 2367, 65367	0.08399	344	0.0253	374	0	0	2	2
Foxn1	CAGTCAGTGAAATCTACAATT, CCAGTCAGTGAAATCTACAAT, CTCACCTTAAAGGTCAAAGAA, GCACTTGATGGACACTCCTTT, GCAGAGGCTTGGTGCAATAAA	5	4504, 40288, 74055, 1323, 71661	0.08402	345	0.0239	357	0	0	2	2
Ywhah	CCTCCCTTCAGCTAATGGAAA, CCTCTTAGCCAAACAAGCCTT, GCCAAACAAGCCTTCGATGAT, GCGATCTTCTTGGAGGGTTAT, GCTGAATGAACCACTATCTAA, GCTTGACAAGTTCCTTATCAA	6	14009, 73833, 4159, 17898, 558, 42017	0.0843	346	0.0234	353	0	1	2	2
Vipar	CCAAGTTCAAGGCTTTCACTT, GCATAGGCATTTCACTCTAAA, GCTACTAAGTTCAAGTGCCAT, GCTTCCATCGAGTTGTGGAAA, GTAGAACTAGACCTGGGAGTT	5	36607, 55923, 59038, 2902, 3996	0.08433	347	0.0243	362	0	0	2	2
Ccz1	CCAGTTTAAGTTCATCTACTT, CGTATGAAGAGCTCCATTTAA, GAAAGCCTAAGTGTAGTCAAA, GCCTAAGTGTAGTCAAATATA	4	41797, 73, 5804, 83424	0.08447	348	0.0175	257	1	1	1	2
Repin1	CACAGAGTGTGGCAAGAACTT, GCGAGTCTAATTGTTAGACAT, GCTCTGTTTAGGAATGGACTT	3	1373, 46003, 6399	0.08486	349	0.0125	185	0	0	1	2
Il23a	CGGGACATATGAATCTACTAA, CTTCTCCGTTCCAAGATCCTT, GCCCTTAGTGCCAACAGCTTA, GCTTGACTCTGACATCTTCAA, TCTCGGAATCTCTGCATGCTA	5	72980, 553, 4828, 92015, 69875	0.08516	350	0.0247	367	0	1	2	2
Tmem5	AGTTGTAGGAAGAACGCATTA, CCTTTAGGTGTAGCAACATAT, CTTTAGGTGTAGCAACATATA, GACAAGCACTAATGAACATTT, GCGACACAGAGTTAAGACCAA	5	9702, 4979, 13794, 107, 45671	0.0852	351	0.0247	366	1	1	2	3
Col4a1	CCAAAGGATCAGTTGGAGGAA, CCATGGATACTCTCTGCTCTA, CCTAGAATTATATCCTGTGTA, GCAATTACTACGCAAATGCTT, GCAGAGATGGTCTTGAAGGAT	5	3362, 25322, 89633, 3938, 8717	0.08595	352	0.0252	372	0	0	2	3
Fam20b	CCCTCTCTATCAGTGTTGCAT, GCTTTACTGATTCTTGAAGGA, GTTAGCAATACTCCTCGTCAT	3	69746, 5934, 3034	0.08596	353	0.0127	191	0	0	1	2
Agbl5	CAACAGGTCATGGTTCTACTT, CCAAAGCTCATCTCCTTGAAT, CCATTCCGTTTCACAGGCAAA, GCCAATAATCTCCACAATGAA, GCTATCCTTTGTTCACCGTTT	5	82185, 18506, 3437, 3931, 31226	0.08626	354	0.0253	373	0	0	2	2
Rsad1	CAGTACCCATAACTGGACGTA, CCTAGCTTGTATGGTTCAGTA, GAGAGTAGAGTCTGTGTTCTT, GCCAATATGAGGTCTCCAATT	4	51791, 41847, 5278, 2088	0.08658	355	0.018	268	0	0	1	2
Myo1b	CCACTCTCATTCAGAAGATTT, CCTGATTGAAATGGCAACCAA, GCCGGAGAAAGTGGAAGATTA, GCGTTCAGTTTCCGAACAGTT, GCTAACTGTTAGCGTCCTCTT	5	32248, 49435, 4738, 1085, 40973	0.08665	356	0.0256	378	0	0	2	2
Fam160a2	CCTCGCCTTTCTTGTTGGATA, CGGACTAAGAAACGCAGTCTA, GAAGACAATTACCTGGAGTAT, GCTGAACAGTTGAAACTATTT, GCTGGTTGATTATATTCACAA	5	53557, 39954, 989, 4794, 70380	0.08705	357	0.026	382	0	1	2	2
Fkbp8	AGGTGAATATAGTGAGGCCAT, GCAAGGATTGAGGGTCAAATA, GCTCTCAAAGCTGGTAAAGAA, GCTGAAGGTCAAGTGTCTGAA, GTACCGAAAGATGCTAGGCAA	5	85485, 63208, 4229, 2684, 53639	0.08705	358	0.026	384	0	0	2	2
2810021B07Rik	ACTTAGACTTTGAGGGTAAAT, ATCACTGGAAGTCACTTAATA, CCAAGGATGATGACTTTGAAT, GCGGAAATGATAGGACAATTT, GTCTAATGAGTTGGAAAGTTA, TCTAATGAGTTGGAAAGTTAT	6	28998, 3423, 14949, 23055, 3213, 6353	0.08719	359	0.0254	377	0	0	2	3
Rinl	CCCGAGCTGGATGCTCAGTAT, GCCATCATTGAAGATGATAAA, GCCTCATCTCAGATTCTGGAA, GCTGATCTGGAGTCCACATAT, GCTGGAGATAATCACTCAGAT	5	52111, 56327, 4906, 8862, 679	0.0872	360	0.026	388	0	1	2	3
Pcdhga3	ACACAACACTGAACCTATTTG, AGTTGACATTAGCGATATTAA, ATGCTCAAGTGTCCTATATTC, CCAGAGTACCATGTCAGTGTT, CCTCTTATAATACCTCAAGAT, CGCCTCCTATTCAGCCTATAT, CTCAATTCCAATGACTATTTC, GCCAAGGTTCTTGTAACGGTT, GGAACCCGATTCCCACTTAAA, GTGATAGTCTCGGATGCAAAT, TGAGGAGGTGTCCCAATATAA	11	2273, 39339, 74065, 48743, 1363, 11549, 64277, 84804, 57887, 73556, 74180	0.08728	361	0.0352	516	0	0	2	2
Fabp9	AGCCAAGCGTTAGTATTAGTT, CACGGAGATCTCTTTCAAGTT, CCCGGAAAGTCGCATGTTTAA, GCCAAGCGTTAGTATTAGTTT, GCTTGGCAAACAGACAACAAT	5	1621, 4608, 62399, 17836, 73194	0.08747	362	0.026	387	0	0	2	2
Gls2	CATCATGCCAACAAGCAACTT, CTCCCTCAATGAGGAAGGAAT, GAACCTGCTATTTGCTGCATA, GTTACAGTATCTGAACAAGAT	4	2172, 53894, 14557, 5312	0.08748	363	0.0185	279	0	0	1	2
Sh2d1a	ACAGGGAGAAGAGATTCTGAT, CAAGGTTACATCTACACATAT, CCCAGACAGAAACAGGTTCTT, CCTCTGCAGTATCCAGTTGAA, GCACGACTCTAGTCCTGTAAT	5	4266, 30107, 2651, 18811, 19757	0.0875	364	0.026	383	0	0	2	2
AI597468	CCACAGTATCTATGGAACATT, CCATCTTACCTTAGTGATGAA, CCCACTTGAATGACTGATCTA, CCTGAATATGTAGGTTCAAAT, GTAAACAAAGTGCCCTTATCA	5	65306, 27263, 4351, 41350, 2408	0.08756	365	0.026	386	0	0	2	2
Gm5382	CGAGAGGAAATCCATTCCAGT, CGAGTACTTAACATCGAACAT, CGCCAACTCTTCAAATCAGGT, CGCCTGAGTTCTTCCGCACTT, CTGGTGGTACAGAACAACGAA, CTTAGCCTTGTAGATCGTTTC, CTTCCTCTTAGCCTTGTAGAT, GAGTACTTAACATCGAACATC, GATCGTTTCCTACGAGAGGAA, GCAAAGGCGAAGAAGACAGAA, GCTTCCTCTTAGCCTTGTAGA, TCAGTGAATGAGCCACCAGAA, TCTTCAAATCAGGTGGCACAT	13	21407, 32684, 49875, 83441, 68663, 1877, 56138, 80356, 1492, 88517, 33436, 45480, 65782	0.08763	366	0.038	565	0	0	2	2
Vasp	AGAGGAAATCATCGAAGTCTT, AGGAGGACGCCATACAGTTTG, CCATACAGTTTGCAACAGGCA, CCCAGAGTGAACCTGTGAGAA, CCCATCGGAGGCAGCTATATA, CGGGCTACTGTGATGCTTTAT, GATCAGCAGGTGGTTATCAAC, GCTAACTCCTTCCGAGTTGTT, GCTGCCATTGCTGGAGCCAAA, GGGCTACTGTGATGCTTTATG	10	2731, 34562, 77561, 17876, 49095, 79031, 91203, 14081, 69411, 855	0.08764	367	0.0338	489	0	1	2	2
Ttpa	CCTAGAAGTATCCTTGGACTT, GAAGATTATCTCAGCAGCATT, GACATTCTTCCTCGGGAATAT, GCCTTCAACTTCTGGCATAAT, GCTGTACTTACAGATTCCTTT	5	19803, 85059, 636, 4949, 9473	0.08769	368	0.026	385	0	1	2	3
Zfp931	AGAAGCAGTCATCTCCGAATA, ATATGAGAGTCATAGTCAAAG, CAAAGCACTAATCTCCGAATA, CGAACACATACAGGAGAGAAA, GCACATATAGTTGAGAGAAAT, GCGAACACATACAGGAGAGAA, GCGTGACCTCCAAATACATAA, GGACAAGTACAGGTCAGAAAT	8	38602, 13834, 21159, 2225, 13355, 2812, 80169, 69660	0.08777	369	0.0308	451	0	0	2	2
Prorsd1	CAGTTCTTCATGATAGACAAA, CCTGAAGACTTTCTCATATTT, GAGCACATAGTAAGAACTTAT, GCTGATGAAACAGCCATGCTA	4	42637, 35187, 1540, 5553	0.08792	370	0.0186	281	0	0	1	2
Olfr1134	CCATCTTATGGCTGTGGCTAT, CGTTATGTTGCCATCTGCAAT, GAGAAGAGGATTCCTTATAAT, GCATTGTTCTTCCTTGTTTAT	4	84479, 245, 70979, 5990	0.088	371	0.0186	285	1	1	1	2
Pycr1	CATTGAGGACAGGCACATTGT, CCCAAAGTCATCCGATGTATG, GACACCAGCTTCAGGATTAAC, GCCAAGATGCTACTAGACTCA, GCTGCCATAAAGAAGACTGTA, GGCTTTCGCTCCTTGCTTATC, GTAAAGATGACTCACAAATTA, GTCACCATCAACTCCATCGAA, TCACTGTGTATGCCACAGGTA, TCTGGCTGCACACAAGATAAT	10	68317, 60867, 46681, 69713, 60811, 5594, 51057, 2350, 60806, 2040	0.08805	372	0.0343	497	0	0	2	3
Ttc3	AGAGTAAAGACACGGATATTT, CACTCCTTATTCTGAGACATT, CGAGTATGTTGTCCGAAATAA, CGAGTTAAACTACCACTAAAT, CGTTTGGTTGTATCAAGGTAA, GCTAACAAATGGAAATCTGAA, GTCGCAGTTCACTAGCATTTA, TCCCGATGTGGAGTATGATAT, TGCATCACAAAGCTAACAAAT	9	45512, 32068, 46308, 22426, 40318, 2806, 1285, 54672, 82378	0.08822	373	0.0339	492	0	0	2	2
Hyal3	AGCAAGATGTAAGGCCCATTT, CTCTACCTGTTCTGGCTTATT, GACGACCTGATGCAGACTATT, GATGCCATTGTTATTCGGGTT, GCATAAGATGGCTTCCAACTA	5	40886, 81550, 1689, 82636, 4633	0.08828	374	0.0262	391	0	0	2	2
Cts7	CCCAACTTTGGATTGGAGAAA, GACCTTATGATGCCTTCCAAT, GCTCATCTTATCCTCTAAGAA, GCTCTACTGCAAGCTCTAGTA, TGGTTTACTATTGGTTGGCTA	5	55249, 4259, 2852, 46129, 27163	0.08851	375	0.0265	393	0	0	2	2
Sp1	ACCAACAGATCATCCCAAATA, ACGAGCTTCAGAGACATAAAC, AGAGAGCCATGAGGCATTAAT, AGCCATCATGCCTTGATAAAT, CCAATGCCAATAGTTATTCAA, CCATCTGTCCAGAGGGTATTG, CCCAACTTACAGAACCAGCAA, CCTTCACAACTCAAGCTATTT, GCAGCAGTAATACCACCCTAA, GCAGGATGGTTCTGGTCAAAT	10	13946, 80936, 28635, 80673, 13776, 23249, 2009, 2389, 46723, 11571	0.08888	376	0.0351	514	0	0	2	2
Megf6	CAGCTATGGATAGTCATATAG, CATTCCTGTCTCTGCCGAAAT, GCAAACACTGTCGTAAGAAAT, GCGCAGGACTGTGTACTATAT, GGCCAGGCTGTGAACAAATTT	5	4018, 47632, 68842, 68507, 3663	0.08901	377	0.0268	394	0	0	2	2
Rab24	AGCCATGAGCAGAATCTATTA, ATCTACCTGTGTGGCACTAAG, CATACTAGGCAAGAACTATAT, CCACGTGGGCCTCACTTATAT, CCCAGTGGAATTAGATGAATT, CGTCGTGTAGACTTCCATGAT, GAGAGCCAAGTTCTGGGTTAA, GCCGATAATATCAAAGCCCAA, TCAGGACTATGCCGATAATAT	9	75750, 62096, 2823, 16328, 37895, 40922, 83278, 32616, 1348	0.08926	378	0.0347	504	0	0	2	2
Tbc1d10a	CATCGACAAGTTCGGATTCAT, CCTGGCTACTACAGTGAGAAA, CTCACGTCTTACACGGTTCAA, GAGTGAGGACACCTACTTGTA, GATTCGTCTTCGATGCCAGAA	5	88226, 74533, 5105, 447, 54271	0.08927	379	0.027	396	1	1	1	2
Mageb3	CCATGCTGAAACAACCAAGAT, CCTGAGGAGTTTATAAGAGAT, GCACACACTGAAAGATCCTAT, GCACGCCTAGAATTGGTCTTT, GCAGTAGTTAACAAGAAGTAT, GCATCCATTCTTGGCCTGTTA, GCTCTGGTATAGGTGGTAGAA, GCTGAAACAACCAAGATGAAA	8	23838, 12795, 84834, 61799, 4186, 1638, 8510, 3072	0.08936	380	0.0314	460	0	0	3	4
Crhbp	ATTTGATGGTTGGATCCTAAA, CCAAAGGAATTGCATCTGTTA, CCAGGAAATGGATTCACGATA, CCGAGTGGAAGGTTTACTTTA, CTTGCATGGCCTTCAGTTAAA, GATCCTCCTGACAGCTCTAAG, GCTCTTCAGTGCCAATCTGAA, TGGATTCACGATAACCATAAA, TGGTCTTACCAGAAGGAGCAT	9	88275, 87946, 19771, 57705, 70252, 25267, 942, 2972, 17896	0.08963	381	0.035	510	0	1	2	2
1110014N23Rik	CACGGGATGCTGAAGCTTTAC, GGGTTCATGGATCCTTCTAAT, GGTGCTGACTGGCATCATTAA, TCTCGCCTCTGCCTGGATTAT, TGGAGGACACTACAGCTATTG	5	4543, 29285, 60379, 2217, 58586	0.08974	382	0.0276	399	0	0	2	2
2012-03-08	CACTTCTGTCACACCATCCAA, CCATGAGTCATCCAAGCAACA, CCCACATAGATAGGTGGCTTT, GCAAGGTGTACCTACAGTTAT, TGCAAGGTGTACCTACAGTTA	5	50779, 4716, 80810, 1700, 74299	0.08976	383	0.0276	398	0	0	2	2
Mrps27	CCAGTTTCTCTCCCTCTATGT, CTGGCTGATCTTGCATCCTTA, GAATACCATCTGGCTGATCTT, GATTAGACAGTGTCTGAAATA, GCCTGTTAGTTCTTTATCAAT	5	1268, 55422, 76896, 4865, 13853	0.08984	384	0.0277	403	0	0	2	2
Cryab	CCATCACTTCATCCCTGTCAT, CCGGACTCTCAGAGATGCGTT, GCGTTTGGAGAAGGACAGATT, GTCCACGGCAAGCACGAAGAA, TCACTGTGAATGGACCAAGGA	5	86105, 12296, 3614, 19594, 4085	0.08987	385	0.0277	402	0	0	2	2
Casp12	CCCACATAATATTTCTTGGAA, GATCCAATCTACAAGATCAAA, GCTAGATAATTTCCATAGGTT, GCTCTCATCATCTGCAACAAA, TGCCCACTATTGAGAGAGTAT	5	77381, 160, 82821, 44567, 5257	0.09023	386	0.0278	404	1	1	1	2
Arf4	AGAATACCCAGGGTCTCATTT, AGTTATTCCCTTGATACTTTA, CCACTTGTGCTACACAAGGAA, CGTTAAATGAAGCTGGATATC, GATGTTGGTGGTCAAGATAAA, GCCCAGTATATGATAGTTCTA, GCTGTCAAATGAACTTTCAAA, GGCAGAAATTACAGCGTTTAA, GTAGATAGCAATGATCGTGAA, TATGCTTCCCTTGAACCTAAA, TCTCCGAAACAGAACATGGTA	11	52571, 55883, 10426, 18917, 56076, 37461, 1589, 2292, 22002, 28220, 31783	0.0903	387	0.0375	555	0	0	2	2
Gabarapl2	ATGAAGATGGATTCTTGTATG, CATAGACAAGAGGAAGTACTT, CCAGATTAAATCCTTAGCAAT, CGCGAAGATCAGAGCGAAGTA, CTCAGTTCATGTGGATCATCA, GCCTAACTATGGGACAGCTTT, TGGAACACAGATGCGTGGAAT, TTCCTGCTTGTGTCTCTTGTA	8	3533, 59492, 15445, 49624, 55405, 371, 5447, 68466	0.09031	388	0.0321	467	1	1	2	3
Prss21	CAACAGCATGTGTAACCATAT, CCCTGGAGTCTATACCAACAT, CCGTTACCAAATAGAAGATAT, CGTACAAGTTTGAGAACCGAA, GCCTATTCCAACCGTTACCAA	5	2992, 17936, 87082, 69790, 4325	0.09043	389	0.0281	407	0	0	2	2
Atxn2	CAGTCCTGTCATACAAGGTAA, CCATGTCTAGTGGCCTAGAAT, CGGAAGCAAGTGCTAAGGATA, CGTCAGTTGTTGGATCGAAAT	4	65612, 1914, 80443, 5618	0.09067	390	0.02	304	0	0	1	2
Vac14	CCAGACATTAACCTGCTGGAT, CCCATCTTACTTCAGACATTA, CCTCTACAATATCGTCAAAGT, GCCCTCTACAATATCGTCAAA	4	47964, 4889, 91392, 4121	0.09077	391	0.02	305	0	0	2	2
Klk12	CAGAACCATGAGCATGATCTT, CAGAATAGTCATCAGGAATAA, CCATGTGTCATGTCTCAGGAT, CTGCAAATACACGGACTGGAT, GACAGGGAGAAGATCTATAAT	5	4432, 46883, 46914, 2743, 14330	0.09084	392	0.0283	410	0	0	2	2
Kctd3	CCCTTATGATTGTGGAGTGTT, CGAGATGAAACTGGTGCTATA, CGCTGTGTGTTACAGAATCAA, GACACGATTCAGAGGGATGAT, GCAGGTGTTTACAAGCCCTTA	5	50665, 22049, 5245, 307, 23216	0.09085	393	0.0284	411	1	1	1	2
Hist1h2aa	CGCCAAGGGAACTACGCACAA, GCAGTGCTAGAATACTTGACA, GCGCATTACTCCTCGCCACCT, GCTAGAATACTTGACAGCTGA, GCTCGTGCCAAGGTCAAGTCT	5	1168, 57323, 4970, 62658, 61574	0.09106	394	0.0287	413	0	0	2	2
Mertk	CATAGTACTGTCGGAACATAA, CCGATTAAACACAGGACCCAA, CCTGGATATTAGATGGACGAA, CGTAAATTATAGAGCGAAGAA, GCATGAGAGAACCAAGCAAAT, GCTGGCATTTCATGGTGGAAA, GGAACAGCTGAGTGCTTATAT	7	1566, 24610, 63076, 21186, 3598, 45563, 10323	0.09126	395	0.03	431	0	0	2	2
Polr2g	CCCACGATACTTCGGTCCAAA, CCTTCAGAGATGGAGTTTGAT, CGTGTAGACAAGAATGACATT, GATGAGATACGCTTGAAGATT, GCTTGGTTGGATCCTGATTTA	5	88956, 4082, 73589, 3901, 72705	0.09145	396	0.0291	419	0	0	2	2
Zmym5	AGGAATTGGATATGTCCATTT, CAACAGCTGTTTGTTATTAAA, CGTACTCGAAAGACACGGAAT, CTCCAGCAATACCTAATGAAA, GCACATCAACAATAGTGTTAA, GCCAGAATTGTGCTGACGAAT, GCGTTTCAGAATGGAAGATTT, GCTCCAGCAATACCTAATGAA, GTGCAGCTACTGTACACATAA	9	63374, 2543, 2436, 2774, 37913, 26608, 60730, 47670, 69600	0.09151	397	0.0367	544	0	0	3	3
Olfr257	CACCGTAGTGATGTTGTACTT, CACTGCCATAGTCTGTAGTTT	2	7816, 3268	0.09152	398	0.0078	131	0	0	1	2
Nrg4	CAGCATCCCAAGCGAAAGTAA, CCCATTCTGTAGGTGCATTGA, CTCTACTGTTTGATTGTTCAT, GCCTGGTAGAGACAAACAATA, GCTCTGCTTCCTGTGCAGGAA	5	52652, 1411, 79542, 43864, 4916	0.09152	399	0.0291	416	0	0	2	2
Hmgcll1	CCAAGGGATGGATTGCAGAAT, CCACTGAGGATTTGATATATA, CCCTAGTCTATTTCCATAATA, CCTGTCCTTACACCTAATCTT, GCAAATATCCTAACAGCTCTT	5	2536, 20889, 49444, 4545, 77918	0.09158	400	0.0291	418	0	0	2	2
Cacna2d1	CAAGAGATTGACACCACGTTT, CCAGTTGATTCTTGGTGTGAT, CCATGACGTAACTAAGCCTTA, CCCAGGAGATATTTGCCAAAT, CGGTGGGATTACGAGAGTTTA, CTTGTCATTACTGGAACTCTA, GCCTTAGATGAAGTATTCAAA, GCTGAGTTAGAGAATGAAATT	8	11354, 67610, 2257, 64969, 70839, 66001, 2962, 71578	0.09173	401	0.0336	487	0	0	2	2
Mbtd1	CCGTCTCTTGAGGATACATTT, CGTGTAGGAATGAAATTAGAA, GAGATCAGATATTACGAAGAA, GCAATATATGTGGGTCTGATA, GCAGGATTGAAGGAAATGATT	5	5343, 23021, 185, 36969, 10581	0.09183	402	0.0291	420	1	1	1	2
Polr3d	ACCTTCTCATATCATCAACAT, ACTTGTATGTTCTCCTGATTT, ATGGACAGATGGTAGTCATAA, CATGGGAACGACCTGTTCTTT, CCGACAGACATGAGGACAATA, CTGGGACATGTGAAGCACAAA, GAACGTGACCCTGCTATTTAT, GCGATGGAACTGAAGACTTAA, GCTAAAGAATGACACACGGAA, GGCAAACTGCTCATCCGTAAG, GTGATCCAGTCCCATTCTATC, TCATCAGTCGGAAGATCAAAG, TGCCTGCCGTCAAAGTGAAAG	13	63776, 4456, 35606, 90165, 38251, 47879, 20979, 74028, 77425, 2069, 52726, 1273, 12747	0.09202	403	0.0421	637	0	0	3	3
Ank1	CCTTCCTATTGTGAAGAACTT, CGTCAACTTCACACCTCAGAA, CGTTGCTAGTAGGAGCTGTTT, CTTCCTATTGTGAAGAACTTA, GCCAATGAGTGTGCCAACTTT	5	4739, 2035, 8417, 88292, 17255	0.09204	404	0.0292	422	0	0	2	3
1700066M21Rik	CATCTAACTGTGAGTCTAATC, CATTGGATGGTGCATCGTTTA, CCGAATGCATTTGCACAAATT, CTCGTCATCCTGAGAATTATC, GCTAATTCTATGACCATTAAA, TCCGGACTTTGGAGCCTTTAA, TGACTTTGCTGAGACCTATTT, TTTCAGGGTTCACGAAGTATT	8	30501, 49135, 1537, 67872, 3226, 25664, 34761, 9567	0.09233	405	0.0342	496	0	0	2	3
Hs3st5	AGGATAAGTCAGTACAATTTA, CATTACCAAATTGCGCAAATT, GTTGCATCTGTTAAGCTATTT, TGTGAAGTGAACACGAAATAC	4	2311, 25056, 5617, 23244	0.09257	406	0.0207	314	0	0	1	2
Ift52	CTTCCAAAGGATCAACAGGAT, GAAATCACTTCTGAGAAGTTA, GCTCATCTGGAACATGATATT, GCTGTTTGTGTCAGAACCTAT, GTTTACCACCAACACTGGCTA	5	7311, 69297, 56040, 810, 5182	0.09263	407	0.0294	423	0	1	1	3
Slc24a2	CGGCATTAGTGAAGAAATCAT, CGTCCTTCTCTTCATCATGTT, GCCATCATTCTGCATGTCATT, GCCGTGTTCAATATTCTCTTT, GCTGAAGAACTTGGATCATAT	5	4644, 15268, 2424, 60538, 31286	0.09263	408	0.0294	424	0	0	2	2
Fam102b	AGAAAGAAGTTCTCGTTTATG, GCTGGGCTTTGCAGATCTAAA, GTCTGTACGGAAGGAATTAAA, TTAGTACTCCAGCGTACATAT, TTTACTGGAAGGCTATGATAC	5	5326, 389, 80894, 55953, 68405	0.09269	409	0.0294	425	1	1	1	2
Dhx58	CATTGGATGGAGTTGGAAGAT, CCAGAACCCTGTGGTCATTAA, CCCAACTTCTCGGTCTACTAT, CCTACAGCTTTGTGCGAATTT, CCTGACTTGAAGCAACAATTT, CGCTACAATGATGCGCTATTT, GCTACAATGATGCGCTATTTA, TCCATACCAGTCTTCGATATC	8	3007, 90419, 83892, 49111, 29031, 42223, 2313, 25222	0.09331	410	0.0348	506	0	0	2	2
Pcdhga6	CCGTTCATCCTACTCTGTCTA, GCACAAGTCAAGATTGCTGAA, GCCTGGTAATATGCTCCATAT, GCGAACAGGTATCTTCGTATA	4	16466, 60831, 1320, 5998	0.09331	411	0.0209	317	0	0	1	2
Nme6	AGGCCACAAACAACCTAACAA, CAGATTCAATTCGTGGAAGTT, CCAACTTTGGAGGACACTGAT, GCAGATTCTGAGCAACAAGTT, GCTGCAGTCCAGTTCTATCTA	5	38136, 4537, 68850, 2867, 62752	0.09332	412	0.03	428	0	0	2	2
Pold4	CCTAGAGGTGTACCAAGTGTT, CCTGAAGACCCTCACTTCCAA, CCTGGCAGTATGGGCCTTGTA, CTCCTATCCTGTTGTGAAGAA, GCTCATTCCAACCTTGGAGAA	5	1025, 87924, 73862, 23751, 5153	0.09336	413	0.03	430	0	0	1	2
Ghr	ATGCCCAAGTAAGCGACATTA, CAGCGAAGTCCTCCGTGTAAT, CCCACATCACTGGCAAACATT, CCCGACTTCTACAATGATGAT, GAAATTGAATGCAGATTATAG, GCTGCAAGAATTGCTCATGAA, GCTTTAACCAAGAGGACATTT, GCTTTGCCTTTGCCTGACAAA	8	80235, 67943, 1734, 33983, 5837, 86719, 3204, 89411	0.09341	414	0.0348	505	0	0	2	3
Nxph3	CCTTTGTCTCTCTCCTTGCTA, CTGCGTCTATATTGCCTTCTA, GCCTTCTATAGCACGGACTAT, GCGAGGTCATATCTCACCTAA, GCGTCTATATTGCCTTCTATA	5	42106, 6110, 4956, 53194, 1626	0.09341	415	0.03	429	0	0	2	3
Prss30	CAAGATGCTTTGGAAGGACAA, CGCTCGTTTGTTCCATCAACA, GAGAACCACTCTGATGCCTAT, GCGAATCATCCAGTCGGACAT, GTGAGGAACATCTTCGTGCAT	5	32235, 69064, 80879, 2713, 4611	0.09371	416	0.0301	433	0	0	2	2
Vmn1r193	CCACATGGCATGTTCTTGTCT, CCTAGTTCTGAGCATGAAGAT, GCAAACAATTCCAGGCCAGAA, GTCTATGTCTCTCCGTCTGTA	4	30541, 71, 6442, 37482	0.09371	417	0.021	318	1	1	1	2
Mkln1	GCATACAATTTACAGGCATTT, GCATGACAAATTGGTGTTAAA, GCCCAGCTTTAACTTTAGCAT, GCCCATCAACTCGTTTATGAT, GCGGAGACAAATCTACACATT	5	2776, 4597, 68672, 54970, 8474	0.09383	418	0.0301	432	0	0	2	3
Gpr153	CCTCTGGACTTGTGATCGTTA, CGACGAAGATTCTGACAATGA, CGCTCTCTTGACTATAGCTAT, CGCTTCATCGTGGCCGAGATT, TGCCAGAACTTCGCTACAGAT	5	32333, 44137, 2630, 4661, 62414	0.09409	419	0.0303	435	0	0	2	2
Atp6v1c2	ACAAGTTCATTGTCCGGGAAT, CCCTCGGTCAACCAAATTGAT, CCTTTGCTGAAAGCCTCATAA, GCTCAGCAACCAGGACTATTT, GCTCTGGAAAGGATGAACAAT	5	67234, 1252, 47609, 5124, 51994	0.09415	420	0.0303	436	0	0	1	2
Srr	CATTACAATTAAGGCCCTGAA, CCAGTGCTAACAAGCTCCATT, CCGTAGCTCTAGTCTACTTTA, GCTGCTAAACTGGAAGGAATT, TGCTGGAATAGCCATTACAAT	5	2233, 79644, 4800, 79165, 39021	0.0942	421	0.0303	438	0	0	2	2
Vil1	CCACAGTGTGACAATTCCTTT, CGGACGGAGAAACAAGTGGTA, CGGGATACAGATATGGAGGAT, GCTCAAGCATGAGGACTGTTA, GTGGAGTAACACCAAATCCTA	5	47826, 85757, 46717, 4980, 1708	0.09429	422	0.0303	439	0	0	2	2
Kcnj2	CCCATCACTATCGTTCACGAA, CCCTTTATATGACTTGAGTAA, CCTTTGTAGTGCCAGAGACTT, GCAAAGCCAAAGAAGAGAAAT, GCTCTTTGAAGAGAAACACTA	5	36999, 38737, 24576, 5441, 370	0.09454	423	0.0303	437	1	1	1	2
Mrpl30	ATGCAGACTGCAGACTGTGAA, CCCTCACAAACTGCACATTGT, GAAGTACAAAGAGGCGTCCAT, GCAAAGCTGAAAGTGGTTAAA, GCTGAAAGTGGTTAAACACTT	5	53006, 3670, 67426, 60854, 4344	0.09459	424	0.0304	442	0	0	2	2
Olfr907	CTTTCTGGTGATGTACGTGAT, GCTCTCACATAATCGCTCTTT, GCTTTGATCATGCTGATTATT, GTTCTTTGGATCATGTACATT	4	1827, 57318, 5938, 54975	0.09489	425	0.0216	330	0	0	1	2
Ugt1a6b	CCTACCTTCCTTACACCAGAA, CTACCTTCCTTACACCAGAAT, CTCAAGAGAGATGTGTCCCTA, GCCCAGATTCTACACCAAATT, GCTTACATTGGAGATGTTCTT	5	50379, 43657, 55956, 4336, 3760	0.09497	426	0.0306	447	0	0	2	2
Hmgcs1	CCTTCACAAATGACCACAGTT, CCTTCTCAATATGTCGATCAA, GCAAGTTTATGTGACCTTAAA, GCAGATTATGTGTTGCTTAAA, GCGTCTTTGCTTGTGTCTAAT	5	5554, 20278, 112, 13563, 51599	0.095	427	0.0306	444	1	1	1	2
Batf2	CAGCACGAATCCTTGGAGAAA, CCACTCATTGGCAGAAGTCAT, GCACGAATCCTTGGAGAAACA, GCCAAGCAACCCTCAGGACAA, GCCAAGTGCAAGAACATTGAA	5	4955, 32647, 28740, 1925, 12702	0.09509	428	0.0306	446	0	0	2	2
Gimap5	CCACTTTCATTAACTTGTGTA, CCAGAACCAAGACATGGACAA, CCCACTGTGTACAAGAATCTA, CTTGTGTATTAGCAGGTGTAA, GCAGAGTCATACTTTAGTCAA, GTTTGACTCTTCTCACCACTT	6	49787, 17850, 3088, 65557, 90409, 3877	0.09519	429	0.0304	441	0	0	2	2
Cd46	CCCTTCATTTGGCAAAGTATA, CTATCAATCAACAGTGATGTT, GCAGAAGGAAGAGCTACACTT, GCAGTAAGTTACAGTTGTGAT, GCTGGTTGTATTAAAGTTCAA	5	37924, 83565, 2514, 4766, 92242	0.09521	430	0.0307	449	0	0	2	2
Mdm1	CAAGAGAACTCGGTCTCATTC, CCAAGAGAACTCGGTCTCATT, CCCAAGAGAACTCGGTCTCAT, GACCATCTGAACCAGATTATG, GACTGAATACAAGCGAAATTT, GATAGGCATCTTCGTAAGAAA, GCCGTTGTTCCCACGAATAAT, GTCCTATTTGTCAGAGTCTTA, TCCTATTTGTCAGAGTCTTAT, TGCACTTGTCTGAGTACAAAG	10	1123, 45803, 65786, 12091, 2915, 81674, 22074, 80431, 9953, 24418	0.09558	431	0.04	596	0	0	2	3
Ugt2b35	AGTCTTTGTAAGGAAGCTGTT, CCACTGAACAGGACTATATTT, CCTTCCTGTAAAGTGCTGCTT, GCTTGGAATCAGAACACAAAT, TGACCAAGTTAGTGGATGAAT	5	3084, 42768, 17021, 89781, 4601	0.09564	432	0.0309	453	0	0	2	2
Grpel2	ACCAGAGAGCTGTCGCTGATT, ACTTCATGGCCGCACCATTAG, CTGCTAGAAGCCAGACTGAAA, GACACGTGTCGTGGCCTTTAT, GCCGTGACAATACAACTCAAT, GCGTGTAGAGAGATTTCCTAA, GCTGACATTGACATCACACTT, GTGGAAGACGCGAAGATATTT, TTAAGGCTCAAAGCTGTTAAA	9	77144, 46332, 14423, 67192, 39363, 3453, 91990, 11789, 169	0.09572	433	0.0397	592	1	1	2	2
Slc20a2	CCACAGCTCATCTTCCAGAAT, CCCATCTCCAATGGTACATTT, CGGCGTGCTGTTCATACTAAT, GAGTTACACAAGAAGCTGCTA, GCCACTTCTTTCTGGCTTCAT	5	63841, 5596, 71328, 243, 12148	0.09646	434	0.0311	455	1	1	1	2
Ndufs2	CAGGATATTGTGTTCGGAGAA, CCAACAATAGAATCTGGCGAA, CCTTGGAATGATGTGGACATT, GAGAAGATGTTCGAGTTCTAT, GAGTCACTAATTCATCACTTT	5	40418, 37293, 5499, 540, 44353	0.09649	435	0.0311	456	0	1	1	2
Psme3	AGAGCCAAATTGGTTTCTAAA, CATACTGGCACAAGCGTAATT, CCAAAGAAGTTACTAGAACTT, CGAGAAATGTAACACGGTCAA, CGCACTGTCACAGAGATTGAT, GCAGAAGACTTGGTGGCAAAT	6	28378, 75470, 4199, 5458, 2333, 56479	0.09655	436	0.0314	459	0	0	2	3
Man1c1	CGGTTCACTTTCGACTACAAT, CGTTATGCGATGGGCAAGAAT, GAGACGCTGAAATACCTCTAT, GCTACCATCATCGATTCTCTT, TCCTGGTTGATGTCAGCCAAA	5	73011, 4998, 2071, 53174, 57635	0.09665	437	0.0311	457	0	0	2	2
Pip4k2c	CGAGCGAAGATATTGCGGATA, CTCCAAGATCAAGGTCAACAA, GAGTCCTTCATCGATGTCTAT, GCATAGGAAGTATGACCTCAA	4	72152, 6288, 1150, 54502	0.09669	438	0.0222	339	0	0	1	2
Cdc23	CCAGTGTTACATCAAATACAT, CCTATCACAATATCAGAGATA, GATACCTGGCCCAGTACTATT, GCCTATCACAATATCAGAGAT, GCCTCCCTAATGATAGCATTA, GCTGTGTAATTGGCAATTATT	6	74856, 4038, 89678, 38102, 42430, 2842	0.09672	439	0.0314	458	0	0	2	2
S1pr4	CAGCCATTAATCCTCTCATCT, CTCAGCCATTAATCCTCTCAT, GCTGACATCTTTGGTTCTAAT, GTGTTCAACTCAGCCATTAAT	4	5540, 11961, 74809, 3409	0.09676	440	0.0222	336	0	0	1	2
Ap4s1	CGGCAATATGCAGCTCTCTTT, GAGATGGCTATCTATGAATTT, GCCAAGGAAGAGATCATGGAT, GCCGAGTGAGTGAATTAGATA, TGAGAATGAGATGGCTATCTA	5	35618, 4435, 3841, 74988, 60256	0.09711	441	0.0315	461	0	0	2	2
Tiam1	CATTCGATCCTGCGAGATAAA, CCAACCATCAACCAGGTGTTT, CCCACAAATTAGCCTTAGCAA, CCTCTTCAGCGTCCGAGAATA, CGGAATTTGGTGTCGGATATT, CTCAAGCTACTGCCGGAATTT, CTGGGTGGACCGAGTAGATAT, GCAAGAGATTGTGTGCGCTTA, GCCGCTGATAATTACGGGTTT, GCGAAATTGTCCACGTGAAAT	10	24109, 12483, 45069, 61727, 70623, 3130, 72917, 673, 34477, 25318	0.09747	442	0.0412	620	0	1	2	2
Hba-x	AGTTCATGTCTATCCTGTCTT, CCTCTCTAGTGCTTTGACTAA, CGACAACCTCTCTAGTGCTTT, CTGGGACAAGTTCATGTCTAT, GCCTACATCCTGCGTGTGGAT	5	4643, 9997, 3304, 50494, 32564	0.0976	443	0.0319	464	0	0	2	3
Psmb11	CCAGGGTAGAAATCTGGCTAT, CGAGAATGTAAAGAACTCTTT, CTCTTCTATGTCTACAGCGAT, GAGTATGTATCCCGCAGTGAT, GCGATAATAATGAAGACTGAA	5	51230, 4918, 2484, 75691, 90769	0.09763	444	0.0319	462	0	0	2	2
Bpifa5	CCTCTCTTGAACAACATCCTT, CGTGGAGTACAGTTTGTCATT, GCCTTCCAAGAACGAACCTAT, GCTTGCGTATCTCCTTGCTTA, TGGTCATTGGTGACTGTATAT	5	67537, 62468, 5451, 79187, 888	0.09764	445	0.0319	463	0	1	1	2
Gnat1	CACAACGTCTATCGTGCTCTT, CAGAACGTCAAGTTTGTCTTT, CCTCGAGTTCATTGCCATCAT, CGAGACTCAATTCTCCTTCAA, GAGCTTAACATGCGACGTGAT	5	5419, 88463, 46080, 87869, 1002	0.09775	446	0.032	466	0	0	1	2
Spdyb	CAGACAAGTACCTCCTGTCTA, CATGTTCCACAAACTGCGCTT, CCATCTAAATGTTATCCCGAA, CGAGTCATTAGATTCTGAGGA, GAGTCATTAGATTCTGAGGAT, GTGTGAAGAGATCCAGGCTTA	6	10486, 89674, 77616, 84991, 4888, 454	0.09777	447	0.032	465	1	1	2	2
Homez	CCCACCAGATATACGACCTTT, CCGGAGATCATTCAATGGTTT, CGGTCTCATTACTTGATAATA, CTACAGCTTGTGTGGACTCAA, GCAGAACATTCTCCCACCAAT	5	10208, 4747, 3039, 23919, 31772	0.09787	448	0.0322	469	0	0	2	2
Cml5	ACAAAGTGCTATAACCCTCTA, CAAAGTGCTATAACCCTCTAT, CCAGTGTTTGCAGACAGACAT, CCCTCTATGAGGCTATGGGAT, GTCATACAACAAAGTGCTATA	5	38405, 4235, 4366, 68320, 18246	0.09817	449	0.0325	471	0	0	2	2
Zfp740	ACAAACGGATGTGCCAAGGAT, CCCGCCTATTTGAAAGCAAAT, GACCGATTACTCAGACACAAA, TCGGAGCAGTTACCACCTCAA, TGTCTGTGATATGCGTTTCAT	5	5529, 40849, 803, 20616, 34592	0.09849	450	0.0328	473	0	1	1	2
Cd97	CCATAGCACATGGCTATCCTA, GAGTGTTTACTACCTGGATTT, GCGTCTGTAACCTGGGATATA, GTCACGTTCAAGTTCGACTTT	4	73041, 5303, 4481, 53674	0.09851	451	0.0232	352	0	0	1	2
Smad1	ACCGTGTATGAACTCACCAAA, CCCATTTGGTTCCAAGCAGAA, GCCGAGTAACTGCGTCACCAT, TCCTATTTCATCCGTGTCTTA, TGGTGCTCTATTGTGTACTAT	5	23242, 5106, 84746, 2174, 41118	0.09907	452	0.033	475	0	0	1	2
Mtmr12	CCAAAGCACAGACGTTACTTA, CCACCCTACGAGATGGTTAAA, CCAGAGTGCATACTGTAAATT, CCCTCCATAATAATGCACAAT, CGTTTCAAACATCAACGACAA	5	27704, 80430, 4705, 34204, 3395	0.09917	453	0.0331	476	0	0	2	2
Fip1l1	ACCAAGCAGTGGGACTATTAT, CCACTGAAGTAGACAACAATT, CCATCTCTTATACCAACAATA, CGTCGCCATGAAAGTGAAGAA, CGTGCAAATGAGAACAGCAAT, GCCCATAATATACTCTGTCTT, TAGTAACTAAGTGGACTATTT	7	60624, 79101, 566, 36375, 58408, 4290, 37458	0.0992	454	0.0355	529	0	1	2	2
Tns3	CCACAAAGACATGACTGATAT, CCCAAATGATAAACTCGTGAT, GAAGAGATATGACCTTACAAA, GCCAGGACTGATAAGACAGAA	4	16513, 55252, 4655, 5304	0.09936	455	0.0237	355	0	0	1	2
Ogt	CCCATTTCTTTCAGCAGAAAT, CCTCTGTTCAACACCAAACAA, GCAGCTTATCTTCGTGCCTTA, GCAGTGTTATACTCGTGCCAT, GCTCTTAATATGCCCGTTATT	5	51206, 4152, 4468, 50395, 30074	0.09943	456	0.0333	478	0	0	2	2
Il4ra	CCCATCGAACAACTTACTGTA, CCCTGCAGAATTCATAGTCTA, CCTACACTACAGGCTGATGTT, CCTGGAATAACCTGTACCCAT, GCCGGTCCAATCAGACAGATA	5	75748, 56856, 715, 36116, 5614	0.09943	457	0.0333	479	0	1	1	2
Gck	CAACTGCGAAATCACCTTCAT, CCAGAGACAGTCTCCTTCATA, GCATCAGATGAAACACAAGAA, GCTACTATGAAGACCGCCAAT, GTTGGAGACTTTCTCTCCTTA	5	49605, 2884, 27717, 6248, 4892	0.09945	458	0.0333	477	0	0	2	3
4921522P10Rik	CCAGGACAACTCAATTCTAAA, CGCCAGTGCAAACCTACATTA, GCCAGTGCAAACCTACATTAT, GCTTCAAATGCAGTAATGGTA	4	41064, 6446, 1269, 87310	0.09955	459	0.0238	356	0	0	1	2
Mcrs1	CAAGTGCTCAACTTCTCAGAT, CTCATGAAACAGTATTACCTA, GCAAGGTGTCATCAAGTTGAA, GCAGCTCATGAAACAGTATTA, GCATTCTCCAGCCTCAGTTTC	5	89844, 5038, 67544, 2470, 58780	0.09959	460	0.0333	480	0	0	1	2
Mia2	CGGGAGAAGAGATATCTGTTT, GAAGAACATATGTACCCATAT, GAAGTCGAAATGCCAACTAAA, GAGGACACAGAATTACCATTT	4	71164, 6476, 10125, 1228	0.09979	461	0.0239	358	0	0	1	2
Dad1	CCTAGCGGTTTGCCTGAGAAT, CTGGACGCCTATCTCCTTTAT, GACGCCTATCTCCTTTATATA, GCAGCTTCATCCTAGCGGTTT	4	20226, 69654, 2537, 6043	0.09984	462	0.024	359	0	0	1	2
Rag2	CCAATGAAATCCCTCCACAAA, CCACACATAGATCCAAGTAAT, CCCTGCTAACTTGTATAGAAT, CCTGCAATCTTCTCTAAAGAT, GCTCAATAAACCCGCCATGAT	5	978, 57383, 79093, 58882, 5562	0.1	463	0.0335	483	0	1	1	2
Phactr1	CCAACTGTTGTGATTGAATGT, CCACGAGTTAAGTAGACACTT, CGGAAATAAGACAAGTGCCAA, GCCATAAATAAACTGGCTCTT, GCCATTCGGAAGGAACTCAAT	5	36552, 5416, 82566, 14704, 1440	0.1002	464	0.0335	482	0	0	1	2
Pole4	AGAAGGCACTTTGGATTAATT, ATGAGCACAGACTAGAATAAA, CCAGAGGAGAGATTTGGATAA, GAGAGTAAAGGCCTTGGTGAA, GCAATAGAAGCTGTGGATGAA, GCACAGACTTTCCTCATCTTT, GCTCAACAAGGAAAGAGGAAA, GGGACAGGAAGCCATCTTTAT, GTTCGTGGAGACTATCGCAAA, TTGGAATGTGGATCGATAATA	10	55319, 20054, 22601, 3326, 73120, 25023, 83275, 377, 40252, 13932	0.1003	465	0.0428	650	1	1	2	2
Nos2	CCAGTATTATGGCTCCTTTAA, CCTATCTCCATTCTACTACTA, GCCACAGCAATATAGGCTCAT, GCTGTAACAAAGGAAATAGAA, GTATTGTACTATTGTGGACTA	5	4472, 37553, 68350, 27809, 4312	0.1004	466	0.0336	485	0	0	2	2
Gpank1	ACCAGGAAGGATTGGGTTATA, CAGATGACAGTAGTTCCTCTA, CGGGCTTTCTATGAGGCTCTA, CGTATGGTCAGAGAGAGTCAT, CTTAGCTGTTGGGCTCTGATT, GAGAGAGTCATGGAGAGACAA, GCCCTGAGAACCAGAACCGAT, GCGAGATCTAAGACTGTACAT, GCTGGAGGGAATATCAATGCT, TGAACCTATGAGGGAGAGGAA	10	443, 11884, 66105, 74248, 22972, 21870, 27186, 31184, 32748, 3310	0.1005	467	0.0429	655	1	1	2	2
Rasgrf2	CCAAAGTTACTGTGCCACATA, CCGAAATCGAAAGGCTTAAAT, GCCTCCCAGATAATGAATTAT, GCGGTTTCTGAGCATTGATTT, GCTGGCAAATTGGCCTACTTT	5	21125, 6888, 1072, 5559, 60300	0.1005	468	0.0336	486	0	0	1	3
Ccna1	AGTGTGCATCAGGACTGAGAA, GCAAGCAATCAGGGAGAAGTA, GCTACTCAAAGTCCTGGCATT, TGCTGGATTTCAACACAGTTT	4	588, 6753, 37985, 85932	0.1007	469	0.0243	363	0	1	1	2
Il31ra	CCAGGAAGAATGGAGTCCTTT, CCGTATTCAATCCAAGCTTAT, GCCGTATTCAATCCAAGCTTA, GCTCTACGATTCAGGTTCAAT, GCTGGTAGTGAACTTTGAGAA	5	59085, 4040, 5431, 48483, 4589	0.1009	470	0.0338	488	0	0	2	3
Zfp810	AGATATAGAGCAGGGTAATAC, GAAGGCTTTCTACCGCAATTC, GAAGTGTGTTTGGAAGCATTT, GACTGTAAGAAGTGTAGAGAA, GCACATTCAATGGCAGGAAAT, GCTATCACACATGCGAGAATC, GCTTTCTACTGTAATTCACAA, TGAAGTGTGTTTGGAAGCATT, TGAGTGTCAAGTATGCAATAA	9	45544, 16138, 21444, 33082, 987, 9769, 3370, 21733, 75682	0.1009	471	0.0454	696	0	1	2	3
Meox2	CCCAACGAGGAGGGCATGTTT, CTGACCAGACTGAGAAGATAT, GAAGGAAACTACAAGTCAGAA, GCAGAATTTGCCCATCATAAT, GTCTTGCATAATCGCGGGATA	5	51402, 3995, 70039, 4612, 40742	0.101	472	0.0339	493	0	0	2	2
Stxbp5l	CCATACGAAGTATGGAGAGAT, CCCACCTCAGACCATGTAAAT, CCTCCAGATTTGATTCTAGTA, CGAATTACTTACTGTCATCTA	4	50650, 2272, 6212, 10501	0.101	473	0.0245	364	0	0	1	2
Ndufaf4	CACGACAAGAACCAAAGGAAT, CCGATAGGAAATCACTTTGAT, CCGGAGTCAGTATCCAGAAAT, GCTCAAGAGTACTATTTAGAA, TGAGGGCCATAACGTTTGAAA	5	90351, 16169, 11556, 3872, 4659	0.1011	474	0.0339	490	0	0	2	2
Dlec1	GCCCAATGAGGTCGGAGATTT, GTGTCTAGACAGCAAGTTAAT, TGCATTCCTCGACCGTCTTAA, TGTTGCCCGGAGTGGATATTC, TTACGAAATTGGACCCGTTTA	5	73340, 85995, 650, 5735, 83155	0.1011	475	0.034	494	0	1	1	2
Rap2c	AGCCAATGAGAGATCAGATTG, CAACTTGTGTTGTCCAGTAAA, CAAGGTTTCATCCTGGTGTAT, CCTGTGAAATTCTAAAGGAAT, CGGGACTTTCATTGAGAAATA, CTCATCCTAGTGGGAAACAAA, GAACCAGAGAGAGAGGTTATG, GAGTGAAGAGATACGAGAAAG, GTTTGGTTAATCAACAGTCTT, TCGTCAGGCAAATGAACTATT	10	17024, 61219, 23332, 62045, 64864, 52621, 1941, 4553, 72913, 2834	0.1012	476	0.0436	671	0	0	3	3
Fabp2	CGAGAGGTTTCTGGTAATGAA, GCGATTCTTTAAGAAGGAATA, GCTATACATGAACTAGTCTTT, GCTCGGTGTAAACTTTCCCTA, TGGACCATTGAGGGAAATAAA	5	73647, 74958, 408, 78403, 5840	0.1015	477	0.034	495	1	1	1	2
Eri1	CGCAATGACAAACGGTTGTAT, CGCTAAGAAGTGGATCAATAT, GCCAGACCAAACTAACAATAA, GCTTGAAACAAGAGGAGTCAA	4	5397, 4849, 60064, 56041	0.1016	478	0.0249	368	0	0	1	2
Rfxap	ACAGACAACATACTCTCCATT, CAGCTACTAAATCAGCAAGTT, GCAACGTCAAACTGGAGGAAA, GCACCGCAACAAGATGTACAA, GCCTAAGACAGTGCTGGTAAT	5	5261, 41668, 92163, 2207, 88344	0.1019	479	0.0344	498	0	0	1	2
Nktr	CCTATGTCATATTGTCACATA, CGTCACAGAAAGTATAGTGAA, GCACAGTAGGTCATCTTCATA, GCAGCTCTTATGACCTCCATA, GCCAGTTAAGACAGAACCTTT, GGAACCGGTTGGTCGAATTAT, TCAATCCTATAGTGGATATTT	7	51416, 4148, 12799, 5285, 1361, 21633, 8652	0.1019	480	0.0364	539	0	0	2	4
Fdx1	CACATCTATGAGAAGTTAGAT, GACCAAGGCTATGGACAATAT, GAGCAGCTCAGAAGATAAGAT, GTGATTGAGAACAACTTAGAT, GTTGTGATTGAGAACAACTTA	5	66542, 3549, 4821, 23362, 24893	0.102	481	0.0347	503	0	0	2	2
Hoxc4	AGCAACCCATAGTCTACCCTT, CCGTCGTATGAAATGGAAGAA, CCTGAACACAGTCCGGAATAT, GCAGAGGACATCACCAGGTTA, TCTAACTACATCGATCCGAAA	5	64851, 47597, 3766, 4754, 62119	0.1021	482	0.0348	507	0	0	2	2
Igbp1b	CCATCTGAGACTTTCACTGTA, CGCTGACCTAAAGTACCTGAT, GCTCGATTTGTTCAGCAGGAA, GCTTCAGAAGTGTGCAACAAA, GCTTCGTAGGTGGATTAGCAT	5	34457, 4520, 4489, 13892, 60456	0.1022	483	0.0349	508	0	0	2	2
Adarb2	GACACGTTGTTCAAGGAGTTT, GAGGTCCAAGAGGAAAGACAA, GCAGCCAAAGTGAAAGCTATA, GCAGGAATCGTCATGACCAAA, GCCGACCTGGAGATCATTAAT	5	43033, 17056, 3103, 76199, 4983	0.1022	484	0.0349	509	0	0	2	2
0610007P22Rik	CACTGAAATTTGGAAAGGGAT, GAAGAGGACATCGATCCCTTT, GATTCTGAGGAGGACAGTGAT, GCTGCCAACCCTGTAAACTAT	4	54757, 4600, 41500, 5521	0.1022	485	0.0253	375	0	0	1	2
Pigc	CCCTGTAACAAATGATGTAAT, CCGTTCCCTGATAACTATGTT, CTCTGCCCTTACTACCTCATT, GCATCTTCCTTGGTTGGGTAT, GCCTTCATTATGGTGACGTTT	5	82716, 4689, 77937, 72523, 3989	0.1023	486	0.035	511	0	0	2	2
Fam92a	CCATCTGATCGACATGTAATT, CGAACAAGGAAGGACCAACAA, GATGATCTCAAAGCAACATTA, GCCAAACAGCTATCTCAGTTA, GTGAACGAAATCAACCTGTAT, TACCCGCACAAGTCGTCATTT	6	4619, 27999, 52477, 83466, 1956, 68618	0.1023	487	0.0351	513	0	0	2	2
Mrpl52	CAAAGGGAGAAGCTTGCAAGA, CTCAAAGGGAGAAGCTTGCAA, GAAGCTTGCAAGACGAGTTGT, GAGAAGCTTGCAAGACGAGTT	4	71542, 43528, 5982, 3228	0.1023	488	0.0253	376	0	0	1	2
Slc25a30	ACTTACGAACAACTGAAGAAA, CCAGACAAATGATGCCAACTT, CGGCACATTTCCAATTGATTT, CTAGATAACTGATGTACATAA, GCTATTGCTAATCCGACTGAT, GCTGTTCAAGGAGGCATGATA	6	3163, 46747, 69860, 4223, 87029, 25510	0.1024	489	0.0352	515	0	0	2	2
Npc1l1	CCACAACAGAACAGTTTCATA, CCAGAATTTATCCCTGAAATT, CCTCCTCTGTAAAGAGAATAT, CCTCCTTCAATACTTCCAGAA, CCTGATCATAACCTTCTCTAT	5	65669, 29428, 3545, 61413, 4858	0.1026	490	0.0353	526	0	0	2	2
LOC640611	CCGAACTGATCGGGACATCAA, CCTAGCTAGAATCTACAGCTA, CTCATTGGATTGCCTCCAGAA, GCCCTCAAGAGTGTGAGAGTT	4	4257, 5666, 72928, 57068	0.1027	491	0.0257	379	0	0	1	2
Ythdc2	GATCATGCATCTCCTATATAA, GCTACCATACGAGCAATTATA, GGATTTGAGGCATAGAGTATT, GTGAACCTCTTCATAAGATAT, TAATCCTTTCCACCAATATTG	5	77392, 4284, 42541, 8754, 4618	0.1027	492	0.0353	519	0	0	2	3
Elavl3	CCGAGATTTCACCACCAACAA, CCTGGCCTATACTGAGAGAAA, CGGCTGGACAATTTGCTCAAT, GCCGAATCATCACTTCCAGAA, GCTGGACAATTTGCTCAATAT	5	4143, 75563, 77056, 4671, 50512	0.1028	493	0.0353	523	0	0	2	2
Slc16a6	CCACCTTCAAACTTGCATGAA, CGCCTTGCTAAGACCAATTAT, CTTCATTTGTTACGCTTTGTT, GACAGCTTTGATGAATCCAAT, GCGCCTTGCTAAGACCAATTA	5	50967, 4957, 52306, 51583, 3356	0.1032	494	0.0353	520	0	0	2	2
Ocm	CAGAGTGGATACCTGGATGAA, CAGCCAATTGAAGGATATCTT, CAGGAAATGGTGCATTCTTAA, GCAGCGGACAACGATGGAGAT, TGCCAGCCAATTGAAGGATAT	5	38728, 2786, 5147, 46976, 87314	0.1032	495	0.0353	521	0	0	1	2
4930511M11Rik	CCCTCAAATGAGACTGTAAAT, CCCTGCTAAATGGAGTGATGT, GAGAGTCACTTATTCATCTAT, GCGTTCTTTACCATTCTGGAA, GTGTAGCAGTGACCACTTATA	5	4636, 88223, 77723, 41253, 4320	0.1032	496	0.0353	522	0	0	2	2
Inca1	CCAAGATCAATTCAAACATCA, CGGGACCCAAGATCAATTCAA, GAACAGTACATTCCACCAATT, GAAGCTGCATTTGGAAAGAAT, GCTTTGAACTCCTAAGCACTA	5	81961, 72889, 11279, 4755, 3965	0.1032	497	0.0353	517	0	0	2	2
Ptgis	CAGCTTCCTTACCAGGATGAA, CTGGAGAGTTATCTGAGACAT, GACACAGAGGTTCCTGAGTTT, GCCTGAGGTGTTTAAATACAA, GCGCTCACAGAAGCCATGTAT	5	5316, 42326, 12579, 91607, 2298	0.1033	498	0.0353	518	0	0	1	2
Arpc3	CACGCTAGGAATCACCAACTT, CCTACCGTATCAAGGAGAGAA, GACACCAAGCTCATCGGTAAC, GAGACCAAAGACACGGACATT, GATGAAGCCATCTACTACTTC, GCAAACAGGAGGACGAGATGA, GCTTTCCTCTCAACGCCATTT, TCAGAGTGATAAACCCAGCAA, TTTGACCCTCAGAGTGATAAA	9	31167, 6130, 3514, 828, 26312, 12836, 28717, 33078, 48382	0.1034	499	0.0476	720	0	1	2	3
Pdyn	CCAATACCTATTCTGAAGATT, CCTCTAATGTTATGGCGGACT, GCCAAACGCTATGGCGGCTTT, GCTGACCGGATGAATGATGAA	4	70328, 33206, 5510, 4938	0.1037	500	0.0261	389	0	0	1	2
Ankar	CCAGACTTTAATGGGATCTAT, CCATTTATTTATGGACGAGAT, CCTGCCTTAGTCAATCTATTA, CGGGTGTTATGTATGGGAAAT, GCCATTATTGATGTGGAACAT	5	5687, 57302, 31938, 68243, 1265	0.1038	501	0.0357	533	0	0	1	2
Efcab5	CAGACCTACATGCGACTATTA, CATGGATATTAAGAAGCACAT, CCAGCGGAATACGTAATAGAA, CGGAATACGTAATAGAATGTA, GCATGCATTGATGATGACCAT	5	10818, 32754, 53313, 5722, 1181	0.1039	502	0.0357	532	0	0	1	2
Ylpm1	CCGAGATATGCCTACTAATAA, CGGGATAAGGAAGTAGAATTT, CGTCCAAGTAATATAACAGAT, GCCAAGAACAAGACTGCTGAA, GCCGAGATATGCCTACTAATA, GCTATATCCAAGCAAGACATT, TCGTCCTCCTCACAATCATAT	7	3489, 82148, 79344, 80438, 3530, 37277, 51228	0.104	503	0.0383	570	0	0	2	2
E130309D02Rik	ACTCTGTGCGGCAGATCATTT, AGACACTGAAGCAGATCTTTA, CCACCTTTGGACTTGCTTGAA, CGAGGCTGATTCTCATCACAT, CTCCTACCTGGTCATATTAAA, GAAATGATTGTCAGCTGGATT, GCACGAGAGATGACCTGAGAA, GCCTCCTACCTGGTCATATTA, GGAGCTCCAGCTTCTTGAAAT, TCGCACTTGCTGTACTCAAAG	10	23054, 1836, 91304, 67015, 2970, 22418, 17417, 35793, 35153, 14220	0.1041	504	0.0465	709	0	0	2	2
Zfp758	CACATCGGAAAGAAAGATGAT, CAGTCAAAGTACACCTTATAA, CATATTGTCCATGAGGATATA, CATCCAGAAAGGTGATCTTAG, CCCTTCAGATAATGTTCAAAT, GTGCTTTATCCAAACAGTATT, TACTAACAGAAGTGATCTTAG, TGCTTCATCCAGAAAGGTGAT, TTATCTAGAAACGATCTTATC	9	50847, 49858, 78238, 3217, 51116, 48257, 1801, 87611, 88823	0.1041	505	0.0482	730	0	0	2	2
Vmn2r10	CCTACTGACGACTCTTATAAT, CGACTCTTATAATATCTCTGA, GCAGCAGTTGAGGGACCTACT	3	7377, 81861, 3167	0.1044	506	0.0211	322	0	0	1	2
Prrc2b	CGCAGACCTCACACTAAAGAT, GCATCCTTCAGGACTGATGAA, GCCAGGAAATTGCATGTGAAA, GCCGACAGTAAACAGAATGTT, TCAGCCTGTTTGACAAGTATA	5	1368, 5695, 22674, 21576, 63205	0.1045	507	0.036	535	0	0	1	2
Aga	GCAACAAACTTCCAACATTTA, GCCAGCCAAATTATTGGAGAA, GCCAGTGTGAACGGAAGTTAT, GCCATGATAATGGATGGCACT, GCTACCAAGCTGTAGAATATA	5	15629, 22507, 6005, 457, 75659	0.1046	508	0.0361	536	1	1	1	2
Olfr1135	CCTCCTATCCTGCTACTATCT, GATACACACTATAATGACCTT, GATACTGTGATACACACTATA, GCCTCTCACTTAACTGCAGTT	4	6493, 2182, 9767, 46482	0.1046	509	0.0269	395	0	0	1	3
2310061C15Rik	CCTGCTAAAGGAATGTCACAA, CGGGAAATGAGGAAGTGTTTG, GAAGAACGGAACCATAGGGAA, GCCGAAGAATATCCTTTCTTA, GCTCTGAAGAACGGAACCATA, TCCAGAGGAAGCTGGGAGATA, TTTCGGCCATTGCAACGACCT	7	82808, 71666, 26808, 4679, 154, 40758, 59087	0.1048	510	0.0391	578	1	1	2	2
Mrp63	CAAGTTCCCTAAGCATAGATA, CATCTCGAAGAAATGGTCCTA, CCAAGCGAAGGAGAGCATGAT, CCTGAGATAGATGAGACCATT, GCATAGATACATTGCAGACCA	5	7516, 4749, 46817, 5919, 4332	0.1052	511	0.0364	538	0	0	2	4
Osbp2	CCGAGGGAAATACATCTCTAT, CCGCATCACATCAAATGCTAT, GCAGTCAACAGTAGGGAGTTT, GCCACATAACTATCCTGGCAA, GCTCCTCAAGTGGACTAACTA	5	58053, 48091, 4681, 4563, 44239	0.1054	512	0.0364	540	0	0	2	2
Orai1	CACAACCTCAACTCGGTCAAA, CACACTTGTATGTACACATAA, CCAGAGTTACTCCGAGGTGAT, CCAGGGTTGCTCATCGTCTTT, CTTTGAGGCCTTGGCCTTATG, TCAATGAGCTGGCCGAGTTTG, TCTGCTGGGTCAAGTTCTTAC, TGAATCAGTCATCGTCGCCAA	8	60128, 2613, 19173, 49131, 40467, 3402, 83440, 6922	0.1055	513	0.0418	636	0	0	2	3
Dppa5a	CCTGAAAGATCCAGAAGTATT, CCTTGTGTCTCCGACCTGGAT, GCTGGTGCTGAAATATCTGTT, GTCTTCATTTACGGCTCTCAA	4	23060, 26465, 6826, 1436	0.1059	514	0.0277	400	0	0	1	2
Morc3	ACACCGTCAGATGATTAATTT, CCAGTTGGATTGTACGGGAAT, CGCTTGTCTAAAGTGGCGAAA, GATTTAGTGCATCCTACTTAT, GCATTCATGTTGACCTTGTAA, GCCTACATTGAACGTGATGTT	6	4789, 89979, 37870, 2017, 21696, 5654	0.106	515	0.0377	561	0	0	2	3
Fzd8	ACGGCCAGCTCTGTATCTTAC, ATATTCCTCTCCGCCTGTTAC, ATCGGTTACAACTACACTTAC, CATCGATATGGAGCGCTTTAA, CCTCTTCATTGGGACTATGTT, CGCGGTCTTCATGCTCAAGTA, CGTTCAGTCATCAAGCAGCAA, CTCATCGATATGGAGCGCTTT, GACCAGGCAGATGCCTTAAAT, GCATCGGTTACAACTACACTT, TACCTCTTCATTGGGACTATG	11	71175, 66494, 62454, 4844, 14022, 58966, 15742, 30790, 73805, 2751, 1681	0.106	516	0.0499	753	0	0	3	3
Thap3	CAGGTCTTACCAGATCGAGAA, CCGCAAGAACCTGAAACACAA, CGCAAGAACCTGAAACACAAT, CTTACCAGATCGAGAAGCAAT	4	56154, 6628, 2082, 7209	0.1061	517	0.0279	405	0	0	1	3
Hecw2	CCTCATTATCTTCTGGGACAT, CCTCTATACATGAAACTGCAT, CTACTTCATGGAACCGGAGAT, GACGAAGAAGACCATGAGTTT, GATTCCCTCAATGATTACTTA, GCAGGAGAGAAGGTCCACTAT, GCGATCTAACTCCATACAGCA, GCTCAAGAAAGGGATGTTCTT, GTTCTTCAATCCTGACCCTTA	9	19026, 14661, 24335, 33222, 90445, 30924, 3612, 53090, 838	0.1061	518	0.05	755	0	1	2	2
Phf5a	CAAGGCTCTGTTCTCCACATT, CCGCATATGTGATGAGTGTAA, CTATCGGAAGACTGTGTGAAA, GACCTGTTCTATGAACGCAAA, GCAAGTGTGTGATCTGTGATT	5	54090, 3301, 42467, 5152, 62274	0.1062	519	0.0372	551	0	0	1	2
Kcnj11	CCATGATTCATCTTGCCACAA, CCCAAGTTTAGCATCTCTCCA, CCTCCGAAAGAGCATGATCAT, GCGGGCAGAAACCCTCATCTT, GCTGATGATCAACGCCATCAT	5	6852, 3413, 15371, 70259, 5127	0.1064	520	0.0372	550	0	0	1	3
1700072E05Rik	CATTGATAGTATGGGCGATTT, CGTTAAGATAGACTACACGAA, CTCGTTTGTTAAGGGACAGAT, GAAACACTATACTGCTGCATT, GTTAAGATAGACTACACGAAT	5	4118, 18342, 74380, 55441, 4899	0.1066	521	0.0373	552	0	0	2	2
9930021D14Rik	CATCTGTGTGTCTGTCTGCTT, GAGTTTCAGTGCAACACCTTT, GATCTACCTCTGCATTGACAT, GTTTCAGTGCAACACCTTTGT	4	49963, 5893, 25970, 4422	0.1068	522	0.0282	409	0	0	1	2
Clta	ACTACGTCTACAATATCTTAA, AGAGCCTGAAAGTATCCGTAA, CAGACGAAGCTTTCTACAAAC, CGGAGTGATGAATGGTGAATA, GAAGCCTTTGTAAACGACATT, GAGCCTGAAAGTATCCGTAAG, TTCGCTGACCTGATTGGTTAT, TTGTTTGTGATTGCATGTTTC	8	13665, 3675, 1950, 46067, 85453, 43752, 41703, 52977	0.1068	523	0.0428	653	0	0	2	2
Kdm4a	AGCACGTTGATGAGTGGAATA, CCGCGATACAGTGAATTTGAA, CGAACATCCTACGACGATATT, CGCTTCAAACTGAAGTGTGTT, GCTCCACTTCATCTCAGGATT	5	4942, 31104, 14014, 4049, 80909	0.1069	524	0.0375	557	0	0	2	2
Prl3c1	AGTAGGATTCAGCCTGGAATT, CCACACGATATGACCGGAAAT, CTGTAGAGCTTAACTATGGAA, GCCAAACCATTTCTACACATT, TCACATCCATAGAGTTGCCAA	5	708, 59014, 90222, 6057, 83703	0.1069	525	0.0375	556	0	1	1	2
Adssl1	CGAAACAGTCTGAAGCTATTT, CGATACGCTCACATGGTCAAT, CGGAAAGAGGATTCCCTACTT, GCGATGTGTATGGTGTGGTAA, GTGGAGAATCACATGGGTGTT	5	5347, 88681, 59328, 79850, 2840	0.1069	526	0.0375	558	0	0	1	2
Ptcd3	ATATAGCTGAGCCTCATATAC, ATCCTCTACGTAAGGTATATT, CAAGAGATTTAAGCGCTATAA, CCAAAGGTTGAAGGATCAGAT, CCATCCCTCATCATCTATGAT, CCCAAAGAGTAGTGATGGATT, GCATCCACAGTAAACAGGGAT, TTGCAACATACCATCATATTA, TTTCATGGAGATGGGTTATTA	9	38318, 2664, 76825, 87236, 3035, 47734, 80579, 10092, 4042	0.107	527	0.0506	764	0	0	3	3
Noto	CGGGACCGAGAGACACACAAA, CTTTAGTTATATGGGCTAGTT, GAAGATGCTGAGTTGGGAATT, GATGGCAACATCCAGAGTGAA, GTGAAGTATCAGAAGCAGCAA	5	62558, 36481, 4982, 3988, 54973	0.1072	528	0.0378	563	0	0	2	2
Chrnb1	ATAGCGCTTGGCGCTTGTAAG, CAATGGGAGATTATCCACAAA, CCCAACAATGTTACTTCCTTA, CCTAGATGCCACGTACCATTT, CCTTCTAGGTTAATCCAACTT, CTGAACCACATCACTCTCTTT, GCCGAAGGCCAACTGATTAAG, GCTGAACAACAATGACGGAAA, GTGGACCGACTACAGGTTAAG, TGAACAACAATGACGGAAATT	10	54950, 59272, 41912, 82304, 79451, 3570, 6703, 11035, 16071, 367	0.1073	529	0.0492	748	1	1	2	3
F8	CCACCATTACTCACTCGCTAT, CCGCTATTATTCAAGTTTCAT, CCTCCAATTATTGCTCGATAT, CGACTCTTATACACAGTCTAT, GCTCCTTTAGTCAGCCCTTAT	5	5908, 66947, 55167, 6678, 1221	0.1073	530	0.0378	562	0	0	1	3
Stk36	CCTGTTGTGTAACCCTGACTT, GATTGGGCAAGGAGCTATTAA, GCAAGGTGAAAGTAGCAGATT, GCATCCCAACATTGTGCATAT, GCCGTATAGTTGTGGCTTCTA, GCCTGTAAACTCATGGCTGAA, TCAAAGGCACACCGCTCTATA, TCTACGCCTGCTGCTATATTA	8	64321, 12788, 15427, 817, 5930, 89888, 4076, 16992	0.1074	531	0.0433	662	0	1	2	3
Vwa1	CACTATGAGTTCTCAAGAGTT, CCGCACTATGACAGATTCTAA, CCGGACACAGACTATGAAGTA, GCACTGGCTTATGCCAAAGAA, GTGGATGATCTTCCTATCATT	5	6007, 961, 24794, 31436, 82162	0.1075	532	0.0379	564	0	1	1	2
Mcm7	ATCCTGCCTACGGCCGATATA, CATGCGAAGATTTGAGTTGTA, CCAGTATCCTTCTGAACTCAT, GAAGATGTAAATGAAGCCATA, GCGAAGATTTGAGTTGTATTT, GTGGTGAATAAGGATGTCTTA, TAAATGTCTGGCAGGTTAATA, TCGACTCAATTTGCGAGAATG	8	53337, 65179, 4727, 67241, 3485, 57894, 86348, 2615	0.1076	533	0.0433	661	0	0	3	3
Ndufa7	AGTCACAAGCTGTCCAACAAT, CCCTCAATCATCATGTCCTCA, GAGCTGTCCAAGGACCAGCCA, GCCGGGAAGTTGTGCCTCCCT, TGTCCAACAATTACTACTGTA	5	60387, 5845, 1503, 70724, 39134	0.1078	534	0.0382	569	0	0	1	2
6030458C11Rik	CATCATATCAGCACAGAAGAA, GCAAAGACATTTCTACCACAA, GCATTGAAGATGATGCTTCAT, GCTTGTTTGTATTGTGGAAAT	4	5820, 21775, 4904, 27919	0.108	535	0.029	414	0	0	1	2
Ap1b1	CCAGAGATCTTGAAGCATGAA, CCAGTTCAATCGTAACAGCTT, CTGCGCAACATCAATCTCATT, GCACATTTCTTCCCTCTACAA, GCCAGGATATGCTCTACCAAT, GTCCTCTGGGTGCCAATATTA, TGTCTCCTCCCAGAGTGAAAT	7	23932, 76723, 56800, 4635, 5645, 753, 60526	0.1082	536	0.0422	639	0	1	2	3
Slc28a2	AGATGCTTGAAGCCTCTGGAA, CCTGCTTGGTCTCTTGTGTTT, CGCTCCAAGACAGTTCTCATA, GCGGAAATCTTGAGCAAAGAT, TGCTGGTTTATTCAGAAAGAT	5	57384, 37952, 46402, 1940, 5724	0.1082	537	0.0384	571	0	0	1	2
Mug2	AGAATCACAAACAAGCTCATA, CAAGGGCGAAATGCCAACTTT, CCAATGTGTTTCCTTCATTAT, CCTCCATTTATACCATCTGAA, CCTGCCATTGTGAAAGTCTAT, CTCATATTTCTGAAGGCAGAT, CTTGCCTGATGGAGAAGTGAT, GATGGAGAAGTGATTGCAGAT, GATTGCAGATTCTGTAAACTT, GCAGATTCACACTTCAGACAT, GCAGATTCTGTAAACTTTGAA, GCAGTGCTTGTGAAGAACAAA, GCCAGGACAATCAGTTAAATT, GTGAAGATAAGTATCTGCCAT, TCATTGTTCCACAATGACATA, TCCATGTGAATGCAACTGTTA	16	76210, 53751, 40756, 76745, 55263, 89732, 68742, 32613, 17570, 18622, 63465, 694, 2211, 84969, 78596, 3293	0.1083	538	0.0592	886	0	1	3	3
Asb8	CCTCACTTGTTTGCCGTGTTA, GAGCTGTTGGACAGTTTGAAT, GCCCTGGATTACAACAACGAT, GCTGCCATGAAGGGAAATCTT, GTCAGCATCCTTCTTGATTAT	5	6213, 47649, 87060, 6798, 523	0.1085	539	0.0386	573	0	1	1	3
Sag	AGCCAAGTAGAGCCTGTAGAT, CCAATGTGGTTCTCTACTCAA, CCCTCAGCAAAGAGATATATT, CCTGGTGTCATACCATATCAA, GCTCAAGAAACTGGGAGACAA	5	5232, 27306, 3520, 44699, 17532	0.1088	540	0.0388	574	0	0	1	2
Hnrnpf	AGCAACGGAGAACGACATTTA, AGCATGGGACACCGGTATATT, AGTATGTTGAGTGGATCTTTA, CCATTTGGATGCACAAAGGAA, CCCACTTTGCACCATGAGTTT, GCAGGTGTTCATTTCATTTAT, GCTCAATTGAGGACGTACAAA, TGCTCAATTGAGGACGTACAA	8	55844, 51664, 48359, 3307, 3300, 75652, 32272, 87539	0.1088	541	0.0443	679	0	0	2	2
Scn10a	CCAGAAGAAGTGGAACATCTT, CCATATTTATCACTGTCACTA, CGGAGATAAGATCCACTGTTT, GTGTTGTTTGTGACCAGAGAT	4	754, 7267, 9311, 81412	0.109	542	0.0297	426	0	1	1	3
Arf5	AGAACATCTGTTTCACAGTGT, CAATGTGGAAACAGTGGAATA, CCACGAGCTGTCAAAGCGCTA, CGGGTCCAGGAGTCTGCTGAT, CTGTCCCACGAGCTGTCAAAG, GAAGCAGATGCGGATCCTTAT, GCATGCTCTCTCTTGTCGTTG, GCGGATCCTTATGGTTGGCTT, TGCTGATGAACTCCAGAAGAT, TGGCAAGACTACCATCCTGTA	10	11904, 1148, 32139, 72953, 69668, 77883, 81081, 3368, 16099, 27896	0.109	543	0.0505	760	0	0	2	2
4930468A15Rik	CACCTTTAACCGGATGTGTTA, CATTGCTCTTTGGAAATTGAA, CCACCTTTAACCGGATGTGTT, CCAGGAGTTATCGCAGGCCTT, CCGGAAGAAAGCTACCTTCAA, CCTGCATTTACCACCAGGAAA, CGAGTATGGTTCTTTCAAGAT, GCAACTCTATCCTGTTTCTTA, GCTACCTTCAATCCATTCCGT	9	26824, 385, 14038, 90291, 86210, 49847, 50717, 3870, 47394	0.1091	544	0.0522	791	1	1	2	2
Gmfb	CCCACAATGCTGCTATTATAA, CCTCGCTTCATTGTGTATAGT, CGAGCTAACCAAGGTATTTGA, CGCTTATGATAGAAACAGTTT, GCTGGGAGTAAGAACAAGCTA	5	4925, 34390, 16140, 4495, 6528	0.1091	545	0.039	576	0	0	2	3
Map1lc3b	CCCAGTGATTATAGAGCGATA, GCATCCTAAGTTGCCAATAAA, GCTCAATGCTAACCAAGCCTT	3	29945, 8719, 313	0.1092	546	0.0226	347	1	1	1	2
Kif3a	ATATTGGGCCAGCAGATTATA, CCAAAGACATTTACTTTCGAT, CCCTGGACATACAGCTTACAA, CGCCATCTTTACAATTACTAT, CTACCCTGGGCAACGTTATTT, GCGAAGAAAGCGTTCTGCAAA, GGCCTGATGTGGGAGTATATA, TCCGCCAGTTTCAGAAAGAAA, TTAACTGCAAGACCAATTATT, TTCCGTTGTTGTACGTGAATG	10	35367, 68799, 65113, 1110, 70562, 3389, 40982, 16978, 12463, 6775	0.1092	547	0.0508	770	0	0	2	3
Xpo4	CCGCTAATACCTCCAGAAATA, GCATTGGTTTAATGGAAGTTT, GCGTTGGAAGAAGTGCTTGAT, GCTACCTCTTAGCTGATGATA, GCTATGTTTGAATCCTCACAA	5	375, 59011, 6318, 26877, 13875	0.1095	548	0.0394	580	1	1	1	2
Tm4sf20	CCACCATCAATAACATGGTCA, CCATCAATAACATGGTCAGTA, CTCAGTATTTATGAGTCTCCT, GCGACGGAGTCAAATTGTATA, GTTACAGAAGTATGTGTCTTA	5	41532, 8692, 5238, 89730, 3634	0.1096	549	0.0395	586	0	0	1	3
Clasrp	CGCTTTGATGTTCGTGCACAT, CGGGAGTACTATGAGAAGATT, GAGGCCATCAAACATGCCAAA, GCTACACCTATGAAGATAGTA, GCTACAGTCGAGAGTACAGTT	5	2805, 67215, 24683, 5518, 29196	0.1096	550	0.0395	581	0	0	1	2
Asb3	CAGGTCCTTTAATTCTGTTTA, CCAGGGAAATGCTGAGACTAT, CCTTTGTTTATTGCTGCACAA, GACAATTGGCAATTACCTATT, GCAGCTAATCAGGATGGAGAA, GCTGGATTTGACCCATTGATT, TTGTTAATACCACGTACTAAC	7	80588, 75263, 69404, 2703, 4053, 30377, 24998	0.1097	551	0.043	656	0	0	2	2
Nefl	CCAGTTGAGTTCCAGATCCTA, CCGTTCTGCTTACAGTGGCTT, CTCAAGTCTATCCGCACACAA, CTTGATGTCTGCTCGCTCTTT, GAGACCATTGAGGCTACGAAA	5	5217, 19735, 51385, 65953, 3756	0.1099	552	0.0395	587	0	0	1	2
Csnk2a2	CAACAGAGATTGACCGCCAAA, CAGGACAACTATGACCAGCTT, CCAGCTTTGGTATTTGAATAT, GTATGATTATAGCTTGGACAT, GTGAAGTATTTGAGGCCATTA	5	66520, 2008, 10433, 12801, 5800	0.1099	553	0.0395	582	0	0	1	2
Sun3	CTTGGTACATTATGTGCTTAA, GACCAAATACAGTTGGCTGAT, GATATGATACTTCAGCCAGAT, GATGTTCTGAAGGCGTTGCTT, GTTGGCTGATTATGCCTTGAA	5	75494, 39158, 2003, 5803, 20448	0.1099	554	0.0396	590	0	0	1	2
Acp6	CCAAGAATCTAAGGAGTGGTT, CCACCTCAAACTCGGTTTGAT, GCAGGTACACAGCCTTCTAAA, GCCCGAAACCTCATTCTCATT	4	7447, 80447, 418, 48222	0.11	555	0.0305	443	1	1	1	2
Zdhhc5	CCTCAGATGATTCCAAGAGAT, CGCACAACCAATGAACAGGTT, GCCCATTTACAATGCAATTAT, GCCTCTATACAGAGACCCTTT, GCTCACATCATGGGTGTGTTT	5	8720, 2116, 5771, 27135, 66630	0.11	556	0.0396	589	0	0	1	3
Cd300a	CCTGAGTGTGTCATGTCGATA, GCCAATGGAGATTCTCTTCAT, GCCACCGTGAACATGACTATT, GCCACTTCTTACAACTCTTAA, TGAGCAGAATGAGTGCCAGTA	5	11983, 3879, 42830, 11011, 5185	0.1101	557	0.0396	591	0	0	1	2
Fkbp2	CTACCACAGAACCAGCCCTTT, CTAGAAGATGGGACGGAGTTT, CTCAAGATTGAGAGACGCTCA, CTGTCCTATCAAGTCTAGAAA	4	77644, 5839, 5290, 16398	0.1102	558	0.0306	445	0	0	0	2
Stx18	ACCTCTCAGGACCTGGAAATA, ACGTGCCAGCATGTGTCTCAT, ATTTCGTTGACGATTACTTAA, CAGGCCTCCTATCTCCATTAC, CATTGGGAAGCTGAGAGATTT, CATTGGTGAAATGAACAGCTT, CGAAGGGAAAGTCGTTGAAAT, CGTGAAGTGATTTCTCACATT, GACAGTGAAGACGCGGAATAA, GACCAGGATGCTCAGATATTC, GACTGAGCAGAGCAAGGAAAT, GAGCACAGGAAGGAGTATATT, GCCACACCATGTCTGACTATG, GCGACTCATTGGTGAAATGAA, TCGACAGCATTCACCAGTTAG	15	21791, 22815, 12804, 69620, 76924, 3000, 46289, 38072, 11189, 63079, 85600, 39968, 16626, 2538, 401	0.1103	559	0.0601	908	1	1	3	3
Mis18bp1	CAAGAGTTACAGAAGCTACAT, CCCTGCTATATCTATCTGATA, GCCGCTATAGAAAGGAATAAT, GCTTACAAATACTTTGCCTAT, GTCTCTCTATTGAAGGAATAT	5	6147, 59476, 45678, 87516, 1040	0.1103	560	0.0399	595	0	0	1	2
Dpep3	CCAACATTAGTGGGTTGACAA, CCTCTGCTCTTGAGAGAACTT, GCATCGTGATGGTGACACTAT, GTGAGAAAGTAGTGGAAGAAA, GTGTGACAATTTGCTGAATAT	5	5327, 41573, 45724, 3508, 73796	0.1104	561	0.0399	593	0	0	1	2
Usp42	CGTCCTGCTAAATGGTGCTAA, GAAAGGTGATACAGCTGAGAA, GCTACCTAAGATCCCGAGTTA, GCTTCTTTAGTACATACTGTA	4	56930, 13428, 6951, 2002	0.1104	562	0.0307	448	0	0	1	2
Lace1	CCTTTGTAGATCCGAGTTTAT, CGACGCCATGATTCTGAAACA, CGGGATTCATGGCTAAGTCAT, GCCATGATTCTGAAACAGCTT, GCCGTCGTGGATAAGTTGTTT, TGACTTCAAGGTGCGCATTAT	6	2854, 23877, 62905, 4751, 85937, 88880	0.1106	563	0.041	612	0	0	2	2
Rpl10	CCAAGTTTAATGCAGATGAAT, CCCGTATTTGTGCCAACAAAT, CCCTGATGCTAAGATCCGAAT, CCGAACCAAGTTGCAGAACAA, GCCATACCCAAAGTCTCGTTT	5	2395, 5715, 18436, 24962, 87191	0.1107	564	0.0401	598	0	0	1	2
Slco1a5	CACTTTATGATAAGCTGTGAT, CCAGATAAACGCATTTATCAA, CCCTGCATTCTTCATTCTGAT, GCTCACTCATTCTAGTCACAT, GCTCCAGATAAACGCATTTAT, TGGCATCCCTGCACCCATTTA	6	47174, 4101, 76110, 4340, 49219, 84689	0.1107	565	0.041	611	0	0	2	2
Trex2	AGAACCCAGAACGGGATGATT, CACCGCTACTTCCAGGCTGAA, CCAAACATGGATCCTGAGATT, GCTACATCTTTGCTCTCTGTA, GTGAGATTACTGGTTTGAGCA	5	41016, 33545, 5216, 3941, 18558	0.1109	566	0.0401	597	0	0	1	2
Zfp473	CCATCCTTCAAGTGTGACATA, CGAGGGCTTGTATGAGTGTAA, CTCCCAGATTATGGAGATATT, GATGCAGAAAGAGCTTTAATT, GCTACCTCATAACACTAATTT	5	36996, 46674, 14799, 3399, 5398	0.111	567	0.0401	599	0	0	1	2
Pcdhb13	CCAGGTATCATAGTGGCAGTA, GCCAGAGAAATGCTCCTTAAA, GCTCACGTTATACCTGGTTAT, GCTGAACTGAGAGTTATAGAT	4	3967, 6338, 37199, 87906	0.111	568	0.0308	450	0	0	1	2
Olfr295	CTCTTCTCTATGCTATGATTA, GCATATTATCAACTGTCTTGA, GCATGTGTAGAGATTCAGTTT, GTAAGCCTCTTCTCTATGCTA	4	2599, 6808, 12391, 43461	0.1112	569	0.0309	454	0	0	1	2
Cops6	CCGGAGTGACTGGGAGTGTTT, CCTATGACCAAGCACACAGAT, GACAAGTTCAAGACAGACTTT, GCGAAATATCGAAGTGATGAA, GTGCAACACAATGAACCAGTT	5	42556, 32880, 28872, 4862, 4929	0.1113	570	0.0401	601	0	0	2	2
Rasef	CCACAGAACTATTCCTATCAT, CGAGGCTTGAAGAAAGAACAA, GCACCTAACTTCAAGCATTAA, GCGCAACTCTAGGAGTTGATT, GCTCAACAGATCCTTGCGTAT	5	39212, 73234, 20306, 5026, 4590	0.1114	571	0.0401	600	0	0	1	2
Mrpl39	CCCACTTGTTAAGACAGTGTT, CCCGAGAGAATAGTCAAGTTA, CCGAACCTCATTCGCAGATTT, CGAACGGAGAAGATCGAAGTT, GCGCTGGAAATATTTCAACAT	5	4662, 45106, 67574, 8789, 5008	0.1115	572	0.0402	606	0	0	1	3
Prpf38b	CCAGTCCAGAAGAACATTGAT, CCATTGGAGAGATGCTTCGTT, CGAAGACGAGACCGAGATTAT, GAGGCATTGTTTCTACAGCAT, GCCCTATACTAAGGAGTGATT	5	2081, 84456, 44721, 5873, 9037	0.1116	573	0.0402	604	0	0	1	3
6720456B07Rik	CGCAACACTAAATGAGAAATT, CGGAGAATAGAGTACATTGAA, GAACCGGGAGTACATTGAGAT, GAACGGAGAATAGAGTACATT, GAACTACTTGTCAATGTGTTT	5	40502, 45322, 399, 62643, 6441	0.1117	574	0.0402	608	1	1	1	2
Nck2	AGGGAGAAACAAGCACTTCAA, CCCTGAATGGTGGAAATGCAA, CCGCATCTATGACCTCAACAT, CGAGGCTGTATGTAGTGAATA, GTGATTGAGAAGCCGGAGAAT	5	73035, 5064, 4557, 68162, 19209	0.1118	575	0.0402	607	0	0	1	2
Gjc1	CCATCTACTATGATGAACAAA, CCTCATAAGATAGACTGCTTT, CCTCTGCCTATTGCTTAACAT, CCTGGGATATGCTATTCATAA, GCTTTCTAATAGGGCAGTATT	5	78804, 86531, 89080, 5541, 3150	0.112	576	0.0402	603	0	0	1	2
Rpusd1	CTTCTGTTCTATGGGCTCCTA, GCACGCCTTCTACCTACGCAT, GCTATCAGAGTGGACACTAGA, GCTGCGGGCAGTGCTTATAAA, GTCCTGGAACACGGCCTATAT, GTGACGATCAACTATGCCATT, TGTGTCCAAAGTGCTGCTAAA	7	59502, 11037, 2295, 53610, 77625, 4298, 79345	0.1121	577	0.0445	684	0	0	2	2
Guk1	CTGTGTCCCATCTACATCTTT, GACGACCTGGATAAAGCCTAT, GAGATGATGCAGCGTGATATT, GATGGCAAAGATTACTACTTT, GCAGGCGCTCTCTGAGGAAAT	5	9271, 4497, 53383, 5120, 63925	0.1125	578	0.0407	609	0	0	1	3
Ccdc67	CCATTGGTTGGTGACAATGAA, GAGTTCATTATCGAGAAGTTA, GCATAGAGAACTGCTGAGAAT, GCATTCACAGTGCACATCAAT	4	45576, 7070, 62557, 2099	0.1126	579	0.0321	468	0	0	1	2
Zfp295	CCACGTATGCTACAAAGCCTT, CCAGCTACAGAGAAGCTGTTT, CCGAGCTCATAAGAACGTCTT, GCAAGTCATCAAGAGGAACTT, GCCATGTTAACATGTACCATA	5	87126, 6489, 51617, 49724, 421	0.1126	580	0.041	614	1	1	1	2
Actrt1	CCTCATGCTATCACCAAGCTA, CCTGACCATCTAGGTATTCAT, GAAGAAGCTCAGTGCATGTAT, GATGGCTTATATCTACACTAT, GCTGAGGACTTCAAAGAGTAT	5	61122, 6242, 48584, 1163, 31326	0.1126	581	0.041	613	0	0	1	2
Ambra1	GCACAGTACAAGATTCTGCTA, GCACCTTCACTTGGACGATTT, GCACTGCAATGTGACCAATAA, GCATTCGCCATGAGCTTCAAT, GCCACTGGGAACGCATTTATA	5	4349, 21151, 9650, 49296, 5187	0.1128	582	0.0411	617	0	0	1	3
Fbxl19	CGCTGGATTGAAGATGTTAAA, CTCCGCTGGATTGAAGATGTT, GAAGTTTAGTTTGAGCCTCAT, GAGAAACCAAAGCCACCTATA, GCTCTCTACACAATACTTGAA	5	5281, 67427, 71621, 4071, 85958	0.1128	583	0.0411	618	0	0	1	2
Zscan12	CCTTCACTCAAAGTGGTCCTA, GCCTTTATTCAGATGTCAGAA, GCGAACTCAGAGTACGCTAAA, GCTGAGCACTAGAGAATTCAT, TGGAGGAAGAATGTAAGTATA	5	51962, 6055, 63722, 1762, 78316	0.1129	584	0.0411	616	0	0	1	2
Cdc42ep3	CGAAGTCTCCAGCGTTATGAT, CGGACTCAATGTTCACAGAAA, GAAAGCGGCTAACAACAAGAA, GCAGAAATCCAGGCTGTCTAA, GCCTGTCATGGAAGAGAAAGT	5	6081, 44227, 84356, 7383, 1829	0.1137	585	0.0413	621	0	0	1	3
Shox2	CCTATGTCAACGTAGGTGCTT, CGCTTTCATGCGCGAGGAATT, CGGATCTCAGACTGAAAGCTA, GATCGCAAAGACGATGCGAAA, GCTTGTAGAGTTGCACCCTAT	5	32975, 19739, 3273, 35603, 5613	0.1139	586	0.0413	622	0	0	1	2
Nlrc3	GCAACCTCTTTCCAGAAATTT, GGTTGGTCCTGGCTTACTCAT, TGGCAGCTACATATTACTATA	3	8774, 1291, 26685	0.1139	587	0.025	370	0	0	1	2
Zfp358	CCAGTATCTATGATGAGGCCA, CCTACTTCTGTACTGGGTTCA, CGATCCACACTGCTCAAGCAT, CTCCAGCCTCACCAAACATAA	4	7125, 2205, 53509, 68941	0.1139	588	0.0324	470	0	0	1	2
Atad2	AGAATGAACTTGAAGAGCCTA, CCACAAGCAGTTAACAAATAT, CTTCAATTGTTCCAGATCATA, GACCACAAGCAGTTAACAAAT, GCCTAACTCAAGAGTTTAGAT	5	29449, 8388, 2058, 6031, 76232	0.1141	589	0.0415	624	0	0	1	3
Myo10	AGTATCTGCAGGGCGACTATA, CAAGCTCATGAAAGCGTATAT, CGTGGAGTTTGCGTTTATGTT, CTTAGGCTACTTGGCACGAAA, GACTATGACCAGGACGATTAC, GCAGGTCTATGACGCTTCTAA, GCCAACACGTACAAGATCGTA, GCCATTGCCAACGAATGCTAT, TGATTGTGAAGAAGCGCTATA, TGCGTCACACTGCCCTATTTC	10	43431, 89327, 79840, 71432, 3655, 76743, 827, 54165, 3904, 65024	0.1142	590	0.0553	836	0	1	3	3
Ghitm	ACAATCTACATGGATACATTA, CAAAGAACCAATGGCTCGTAA, CCCATCAATTCGATGTTGACA, GCTTGTTTAATAGGAGCAGAT, GTAATCAAACGTGCAGAAATA	5	9755, 20767, 2294, 51555, 5967	0.1144	591	0.0415	623	0	0	1	3
Olfr824	CAGACTTCATACACCAATGTA, CCTTTCCTGTACACAGTCCAT, GACTTCATACACCAATGTATT	3	7520, 33974, 5188	0.1145	592	0.0251	371	0	0	0	2
Vmn1r66	CCAATGCCTTGATAGTTCTTT, CTGCAGATTAAGTTTGTACAT, GCACACAGCTTTGATTCTCAT, GCCAAAGTTGCAAAGTATATT	4	14157, 89136, 5021, 6226	0.1145	593	0.0326	472	0	0	0	2
Slc2a12	CTGATCTTATTGGTTTGTCAT, CTGATGATTGTCACTGGTATT, GCAAAGGCGAACTATGTGAAA, GCAAGCAATAGCGATGTACTT, GCAGCCAAACATACTATTCTA	5	89211, 5931, 49301, 79328, 2438	0.1146	594	0.0416	627	0	0	1	2
Alg12	ACAGGGCATATCTTGGTGAAT, AGTACGACCACCACGAGTTTC, CCACCTGGTTATATGTCCCTA, CCACGATATAAACCAGGTCTT, CCTCAGACAGATGTCCTTCTT, GCTGTCATGTTCTGCTGGATA, TTGAGGGCACTACAGGTATAA	7	1811, 4578, 83634, 78171, 6160, 10233, 48592	0.1148	595	0.0464	706	0	0	2	3
Sf1	CCCAAGACGAATATCCAGAAA, CCGATGGAACCAAGACACAAT, GCACGGATGGATAAAGAATAT, GCGTAAAGATGGTCAGATGTT, TGTAGCATCGAGTGTCTTCTT	5	61103, 14770, 5348, 4253, 30027	0.115	596	0.0417	631	0	0	1	2
Sprr1b	CCACAGTTGCATGAGCAACAA, CCCTCAACTGTCACTCCAATA, GCCATGTGTCTCACAAGTCAA, GCCTCAATTTGCATTCTGTTT, GTCACTCCAATACTAGCCCAA	5	27643, 4360, 57838, 5314, 55939	0.115	597	0.0417	632	0	0	1	2
Lss	CCAACCTGTATCCTGACAATA, CCCGATCTCAAAGACCATCAA, GCACTGAAGCATTTCCATGAA, GCGCTTAAAGTTCTTGGACTA, GCTCTCAGAATCCTGGGTATT	5	5527, 54814, 10053, 61365, 3724	0.115	598	0.0417	630	0	0	1	2
Wbscr28	CCGGAAGTCATCATAACCTGT, CTGCTTCAAGCTGCCTTTGAA, GAAAGCCCATCACTTTAGTCT, GAAGTCATCATAACCTGTGCT, GATGCAGAAAGCCCATCACTT	5	73972, 18862, 6089, 85471, 2049	0.1151	599	0.0417	629	0	0	1	2
Neurod6	CAACTCTATCTAAGGTGTTTA, CACTTCCCTTACGACTTACAT, CCACCAAACTACGACTGGAAA, CCTCAGTTTGAAGGTCCCTTA, GCAGAAAGTTTGCTAGACAAT	5	88412, 3227, 5706, 21498, 74508	0.1152	600	0.0418	634	0	0	1	2
Robo2	CCCAACACAATCTACTTGTTT, CCCACCACTCTGAACTGTAAA, CCGGCATTTATAGCTGGCATT, CGCGTATATCATTGAGGCTTT, GCTGACAGTTGGAAGTCACAA	5	14388, 5250, 45164, 4598, 92414	0.1152	601	0.0418	635	0	0	1	2
Klrb1f	CCACACTGGAACAAATGTTTA, CCAGGGTATAAGCAAGCATCT, GCAGAACTTGATAAAGGGAAA, GCTCTATGGAAGACGCCATTT, TCCACACTGGAACAAATGTTT	5	35673, 82888, 9957, 1352, 6341	0.1154	602	0.0422	638	0	0	1	3
Med26	CCTGAAGAATCGCAACGACAT, CGCACCACTTTATGGCTGAAT, GCGCTTGAACATTCTGCCTTA, GCTACCAGTTTACTAACGATT, GCTCATCAATGATGTCCGCAA	5	28620, 52706, 6623, 543, 16477	0.1156	603	0.0425	641	0	1	1	2
Zfp277	CCTGACTTTAACCCATTGTTT, CCTTAAAGATCACATGAGAAA, GCACATGATTATCGAGCATAA, GCAGCGTGATAAGAATCAATT, GCATCGTAGGATCAATCCAAA, TGATTGTATTACAGCGTTATT	6	21164, 5655, 69256, 92388, 86198, 932	0.1157	604	0.0448	687	0	1	1	2
Nisch	CCAGCATCTCAACGTCATCAA, CGACGAATCTGTGAAACTGAT, GAAGTGTTAAGTCCAGTCCTT, GAGATCGACGAATCTGTGAAA, GCTGTGTACTTCATACTGCAT	5	26471, 6469, 15167, 32826, 1037	0.1158	605	0.0426	646	0	0	1	2
Nfat5	CCACCATGTTTCAGACACCAA, CCCAACATATTTCTTTCCCAA, GCAATGATTCTGGTCGAGTAA, GCAGAACAACATCCCTGGAAT, GCGAAATACAACTCCCTGCAA	5	6261, 39201, 1675, 7256, 67272	0.1159	606	0.0426	644	0	0	1	3
Itgb3bp	CATCATCTTGACAGCTTTGAA, CCCTAGTACCATGCTCCTTAA, GATGGATTCATGGTGTTGCTA, GCACAGAAACGGACCATCAAA, GCACAGAAGAACGTGTGTAAT	5	80494, 2242, 21886, 68924, 6073	0.1159	607	0.0426	645	0	0	1	2
Yme1l1	CCTGAGAATGACAGATGGAAT, CCTTGGATTATCTGAATTGAA, GCAGTCTACCTCTGAAAGATT, GCTCACCAAGATGCATTTAAA	4	12369, 7996, 7, 8788	0.1159	608	0.0334	481	1	1	1	3
Bmp1	CCGTTTGTGATTGGAGGGAAT, CGACAACAAACATGACTGTAA, GACACCATTGTTCCCAAGTAT, GCCGTCTTTACACACTGTATT, GTACCGTATCTCCCTGCAATT	5	56027, 3115, 5788, 79883, 71136	0.116	609	0.0427	649	0	0	1	2
Oplah	CATGTTCAGATCAACCTGAAT, CCATCCTTGTAGAACCAGGTT, CCCTGTCTTACACACCTGAAA, GCATGTTCAGATCAACCTGAA, GCTCCTGTGCAAGTCATAATT	5	2031, 16997, 33938, 6150, 68612	0.116	610	0.0427	648	0	0	1	2
Rnf167	CCAGTCTAATAAGCTGAGGGT, CCCTTGGGCTATTACCTCATT, CGAAGATTCGACTGCAACTTT, CTCTGGTGACCGTCCTATTTG, CTTACCAAAGAGCAACTGAAA, GCCATCTGTCTGGATGAATAT, GTCAATGGGTCAGTCTTTATT	7	83518, 1690, 5417, 91512, 42299, 12008, 4674	0.116	611	0.0477	721	0	0	2	3
2012-09-10	ACACGACCTCCAAGATCAATG, CAAGGCAGATACAATTTCTAA, CTCCAAGATCAATGGAGCAAT, GCAGACACATATGAGGCACTA, GCCTTATCAGTAACTCAGTTA	5	5952, 2631, 68968, 22446, 53781	0.116	612	0.0428	651	0	0	1	2
Entpd7	CCTCTTCTCAGAAGTCGCAAT, CGACTTCAACAACAGCGAGTT, CGCCTTTGAAATGGATGACTT, CTGAGTCCTGACAATCCCTTT, GTTGGCTATCTTGGCAGATTT	5	77120, 27210, 2150, 63440, 6116	0.1161	613	0.0428	654	0	0	1	2
Rbpj	CCAGACAGTTAGTACCAGGTA, CCAGTGACTTTGGTCCGAAAT, CCCTGTGCGTTTATTGGAATA, CTGTATCACAACTCCACAAAT, GCAGACTCATTGGGCTACATT, TAGGGAAGCTATGCGAAATTA	6	4524, 77223, 88449, 4412, 56116, 9442	0.1163	614	0.0456	700	0	0	2	3
Anp32e	CCAAATCTTACCTACCTCAAT, CCTACCTCAATCTGAGTGGAA, CGATAATTGCTTGTGTGTCAA, GCGATCACATTGTCTTTGTTT, GTTGGAACTTAGTGACAATAT	5	2263, 68832, 11537, 6097, 83865	0.1164	615	0.0431	657	0	0	1	2
Psen2	CCACTATCAAGTCTGTGCGTT, CCTCGTGGTACTCTACAAGTA, CCTGATATACTCATCTGCCAT, CTCCTCAACTCCGTGCTTAAC, GAGAGAAATGAGCCCATATTT, GCAGGCTTACCTTATTGTGAT, TACACTCTAGTGCCATATATT	7	90934, 45278, 4971, 76503, 854, 32493, 17830	0.1164	616	0.048	723	0	1	2	2
Lgals6	CCGAAGAACCATCATAATCAA, CCTGGAACTTCAGTCCATCAA, CGCATAGGTGACTGTTTGGTT, GAACCATCATAATCAAGGGAT, GATGTTGCTTTCCACTTCAAT, GTGAATGGAAGTCCCTTCTAT	6	4810, 61068, 81653, 81806, 3604, 26573	0.1166	617	0.0457	701	0	0	2	2
Cst13	AGTAAACATTGCCCGAACAAT, CCGAACAATGTGCAAGAAGAT, GCAAGAAGATTGCAGGAGATA, TGCCCGAACAATGTGCAAGAA	4	8017, 108, 91005, 39706	0.1167	618	0.0339	491	1	1	1	2
Nrp2	CCAGAGAAGTATCCACACAAT, CCGGATTGCTAATGAACAGAT, CCGTGAAGAGTGAAGAGACTA, CCTCAAGCACAAGGTCAAGAT, CCTCACTTTGAAATCGAGAAA	5	4717, 5299, 51216, 36548, 38014	0.1167	619	0.0432	659	0	0	1	2
Pus3	AGTCTGGTCTACAAGTATATT, CCACATTTACTCCATAAGGAA, CCAGGGAGCAATAACCAGTTA, CCTCAATATAGCATGGCTGTT, GCAGGGATTCAGAAGATTCTA, GCTTTAACTAAGACCCGACTA, TGAGCGGACTTATCGCTATTT	7	60367, 1378, 36243, 41770, 4812, 17566, 53322	0.1168	620	0.0482	727	0	0	2	2
Sart3	CCAAACATTTGGCTAGAGTAT, CGATAGATGTTGGTCCTCCTT, CGCTACAGTCAGTACCTAGAT, GCCCGTATTCAGTTGATCTTT, GCGACCTTTGTTCTTAGGAAT	5	67581, 6736, 440, 47852, 82459	0.1169	621	0.0432	660	1	1	1	2
Zfy2	CAAGCTTAATAAGAAGCGAAA, CATCCTGAATACCTTGCTAAT, CCAAACAGTACCAGTCAGCAA, CCAGTATTACATCAACCTCAT, CCATTTCTGCTTAGTCACCAT, CTCGATTTAGATACAGCTGAA, GATACCAAAGAGGCTCAGCAA, GATAGCCTAGTAGAAAGAGAA, GCAATATTTGTTGCTCCTGAT	9	55282, 4220, 41913, 229, 58453, 78713, 45190, 81174, 55424	0.1172	622	0.059	882	1	1	2	2
Gstp2	CAGAAACTATGAGAATGGTAA, CCAGATCTCCTTTGCCGATTA, CCTCACCCTTTACCAATCTAA, CCTTTACCAATCTAATGCCAT, CGGCAAATATGGCACCATGAT, GATCTACAGAAACTATGAGAA, TGGCACCATGATCTACAGAAA	7	61541, 32746, 14212, 67561, 59536, 3532, 4115	0.1172	623	0.0484	737	0	0	2	2
E2f4	AGAAGTACCAGATTCACTTAA, AGATCGCTGACAAGCTGATTG, CAAGAACAGCATCCAGTGGAA, CATCGGTCTGATCGAGAAGAA, CCACGATTACATCTACAACCT, GAAGAACTGATGTCTTCAGAA, GCCTACCATCACCTTTCCTTT	7	5369, 55574, 5159, 48677, 403, 32288, 46488	0.1172	624	0.0484	739	1	1	1	3
Chrna2	CCACTCAACATGACAACTATT, CCCAGACATTGTTCTCTACAA, CGGAACCTATAACAGCAAGAA, GCTGCTCATCACAGAAATTAT, GCTGTTCATTATCGTCTGCTT	5	9747, 73017, 87153, 2186, 6179	0.1174	625	0.0435	667	0	0	1	3
Creld2	CCAACCTATTTGAGTGGTTCT, CCTATTTGAGTGGTTCTGTGT, CCTTTAAGTTATTGAGAGGAT, GAAGCCAAACTCACCCTTTAA, GACGCTGTCTAAGTACGAATT, GATATAGATGAATGCTCACTA	6	5920, 50777, 74075, 67349, 390, 85623	0.1174	626	0.0462	705	1	1	1	2
Smarcc1	CAGTTGAAATATGCTGAACTA, CCTGAAATATACTTGGCATAT, GCCAACTCTAGGAAGAGGAAA, GCCGCTCAACAGATGTTAAAT	4	13138, 7237, 42424, 2586	0.1174	627	0.0344	499	0	0	1	2
Armcx6	AGAGCTTTAAATCCTTCACTT, CAGATTAAGATGTCCATTGAT, GCAGGATTAAGTCTGCTAATA, GCAGGTAAAGTGCATTGTAAA, GCCATTCCCTTATGAACATAA	5	9113, 21079, 37013, 911, 6609	0.1174	628	0.0436	669	0	1	1	3
Aspn	AGAAATTGAGAAGGCTATATT, CCTGCAACATTTCGTTGTGTT, CGGTTCCAAACAACATTCCAT, GCTCTGCCAAACCCTTCTTTA, GCTTCAAGTATTCACAGATAA, GGTGGAACTTGAAGATCTTAA, GTTCCAAACAACATTCCATTT	7	39918, 29899, 81271, 57893, 3502, 4137, 16003	0.1175	629	0.0484	736	0	0	2	2
Olfr272	CAATTACCATTCTGCACTAAT, CGCAGTAGTCATCCATGACAT, GCTAGTTATTGCTGTCTCTTA, GTACGCAAAGCCCAAGTCTAA	4	1178, 7715, 18661, 81647	0.1175	630	0.0344	500	0	0	1	2
Mfn1	ATGCAATGCTGTGGGATAAAG, CCCAGTGTACTGAAAGTGTAT, CGGTGTACCAATGAAGTCAAT, GCAAGATTACAGGAGTTTCAA, GCCTTGTCTTAGCATTAGTTT, GCGTTTAAGCAGCAGTTTGTA, TACGGAGCTCTGTACCTTTAT	7	40766, 26834, 38129, 8553, 3803, 4045, 57044	0.1177	631	0.0485	740	0	0	2	3
1200011M11Rik	CAGTCAAACTTGCCGCATAAT, CATCACTTATGATCGTGTATT, CCAGTCAAACTTGCCGCATAA, CGCAGACTGAAGCTGCTGTTT, GCCACATTATGCTCAACTTAT, GCCATTAAGGATTGCCCAGTT, TTGTGGGAAATTGGATCATAT	7	63690, 1902, 38231, 4680, 10840, 20006, 64100	0.1177	632	0.0485	741	0	0	2	2
Nat10	CCTCCAAGAGTCAATCCGATA, GAAGACAAAGTCACTCTTGAA, GCACCATCGTTCCATCTGTAT, GCAGTGGAGAAGTGGCTTAAT, GCTGGATTTGTTCCTGTCTAT	5	16024, 66663, 3741, 76147, 5688	0.1178	633	0.0436	670	0	0	1	2
Baz2a	CCAGGATGTAAGCAGTGACAT, CCGACCTCGAAACAATGAGAA, CCTCCTCTAAACCAATGAATA, GCACAGTTACTGAAGATGAAA, GCCTCCTCTAAACCAATGAAT	5	32345, 27241, 5568, 4106, 32309	0.1179	634	0.0436	668	0	0	1	2
Glt8d2	CCTAGTGTTCACAATGACTTA, CGGGAAGTATTCCACCATCAA, GACACTCTGTGGGATTCTGTA, GCATGAGAAAGTCATCTATTT, GCCTGGTCTATACAGTGAGTT	5	4610, 73758, 5401, 19928, 38996	0.1179	635	0.0436	672	0	0	1	2
Ap1s3	AGGAGCTGAAACTTGTTTATA, CTGATATGTTACAAGAGACAA, GCTGCCTGTATTGTAGCATTT, GCTGGATAAATACTTTGGAAA, GTGAGCTGGATATTATCTTTA	5	6026, 3745, 5712, 47884, 38792	0.1183	636	0.0441	678	0	0	1	3
Cnot4	CCCATTGACAAACCTTCAGAT, CCCTTGGAAATAGATGATATT, CGGGTTCAGTTGATAAGAATA, CGTATGTAAGTAGTAGCCATA, GCCAGTGCTTATGTAACGTAT	5	599, 30277, 69408, 6763, 91846	0.1183	637	0.0441	675	0	1	1	2
Mup9	CGTATGATGGATTCAATACAT, GATAACTTTCTTATGGCTCAT, GATAGAAGATAATGGCAACTT, GCCGAGAACCAGATTTGAGTT, TCCATGCAGAAGAAGCTAGTT, TGACGTATGATGGATTCAATA	6	5022, 43666, 3231, 14574, 15796, 7580	0.1183	638	0.0473	718	0	0	1	3
Atf7	CAGTCATCATTGCAGATCAAA, CCATCAAGTTTCTTCAATCAA, CGGTAGTTCAATCTGTGTTAT, GCAGCTACTGTTAGCTCATAA, GCAGTTCATAAACATAAGCAT	5	6322, 42158, 90003, 1934, 75206	0.1184	639	0.0441	674	0	0	1	2
Adrb2	CCCACAAGAAAGCTATCGATT, CCTCATCCCTAAGGAAGTTTA, CCTCTTTGTATGGAACTTAAA, CGGCTACTCTAGCAATAGCAA, GCCAGTCACATCCTTATGAAA	5	83359, 1422, 6499, 27959, 24552	0.1185	640	0.0441	676	0	0	1	2
Rnf20	CCTTGCTGTAACATGCGTAAA, CGCATCATCCTTAAACGTTAT, CGGAAGTTTGAGGAAATGAAT, GCGAATCAAGTCTAATCAGAT, GCTCAGAAGAAGCTCCATGAT	5	1259, 91400, 42633, 54023, 6569	0.1187	641	0.0444	682	0	0	1	2
AI480653	CCCTTGTAAAGAACTGGCTTT, CCTGAAGTATAAGACCAACAT, CCTGCTGATGATGTTCACCAA, CGTCAAGATCTACCATGGGAA, GCTTGCTGACAAGTACCACTT	5	64243, 6059, 34117, 2822, 48461	0.1189	642	0.0444	681	0	0	1	2
Mup4	CGATACAGCATTGGGTGACAA, CTTCCAAGGGACAGAACTTAA, GAGGAGCATGGAATCATTAAA, GCACATCCATGTCTTGGAGAA, GTGATGTATGATGGATTCAAT	5	2128, 44904, 71227, 59031, 6296	0.119	643	0.0445	683	0	0	1	2
Utp14a	CACTGGGTAACCAAGAAACAA, CCAGGAGGTATTATCTGAATT, CCTGACATAGTGAATGAGGTA, GCAGGATGATCTAATGGATTT, GCCATATTATCAAACCCATAA	5	5639, 27721, 61874, 37484, 4123	0.1192	644	0.0447	685	0	0	1	2
Nxf3	CCACATCGTCTACCAGTTATT, CCTGAAGATCACAAGACCTTA, GCACAAGAAATGTGACATTAT, GCAGCATAATTTGTAGGAAAT, GTGAATGTTGACAGGTCTCAA	5	34126, 912, 6721, 91829, 83005	0.1194	645	0.0448	688	0	1	1	2
Olfr1262	CGGGTCAATGTGTTTACTCAT, CTTGTATGTGAGACCAGTGAT, GACTACATTTATAGCCCAATT, GCTGAAATCATCTTGCTGATT, GCTTCCTATGTGGTCATCCTT, TGAACCGACATGTATGTATTT	6	72991, 52366, 60436, 6142, 89798, 35	0.1194	646	0.0475	719	1	1	1	2
Ubr2	CCAGAAAGACAACAGGAAATA, GACGAGGAAATCCTTTACATT, GCAGGTTTGCATGTATTGTTA, GCGTTACTTCCTGTGGTACAA	4	31149, 3129, 7199, 31351	0.1195	647	0.035	512	0	0	1	2
Irx5	ATCCGGGCTACACGAACTATG, CATACAGCACCAGCGTCATTT, CCATGGCCTTGGCAGTTATTT, CCTTGGGATATCACCCTTATG, CTACACGAACTATGGCTCCTT, CTATGAGTTGAAGAAAGGTAT, GCATACAGCACCAGCGTCATT, GCTCTCATTTCAATGGATTAA, TCCTTGGGATATCACCCTTAT	9	29937, 80063, 1499, 3881, 48208, 76410, 87959, 33193, 89921	0.1195	648	0.0606	914	0	0	2	2
Cdh12	CAGGTGTCATTAGAACAGCAT, CCAGTATTTCAATGCCTGTAA, CGATCCCATTTCCAACGAGTT, GCAGAATCACTCAGCTCCATA, GCAGCAATTCTCCTTTAGATT	5	67935, 3495, 31507, 5869, 74565	0.1195	649	0.0448	686	0	0	1	2
Mrps26	GAAAGAGCAAGAAGTGCTCAA, GACAAACTCAGGGCAGCATTA, GCAACTGAAAGAGCAAGAAGT, GCCCAAATAAGCACAGTGCTT, GTGCAACTGAAAGAGCAAGAA	5	1166, 14389, 6652, 35764, 12565	0.1196	650	0.0451	691	0	0	1	2
Ppp1r2-ps9	CAACCATGTCTACATTCAAAT, CGACAATTGAACATCTAGAAA, GAAGACACCTTAAGTGAAATT, GCAACGGAAGAAATCGCAGAA, GCAACGGCAATTTGAGTTGAA	5	480, 6882, 82601, 50416, 9645	0.1196	651	0.0451	690	1	1	1	3
Tff1	AGAAGAAGAATGTCCCTTCTA, CCAGGAAGAAACATGTATCAT, GCACGGAGAGAGGTTGCTGTT, GCCATCGAGAACACTCAAGAA, TCCTGAGAGAACTGGCTACAT	5	51080, 6837, 26697, 625, 61354	0.1197	652	0.0451	689	0	1	1	2
Supt3h	CACTTCAAGTAGTGGAAGAAA, CGACAGTTAAGTTTCTCCAAA, CGGTACAAACAAGAGACAGAA, CGTACTATGGATTCAGCTCAA, GCTCTTCTAGTGAGGCAAGAT	5	1322, 35403, 36305, 6615, 6680	0.1199	653	0.0452	692	0	0	1	3
Olfr1289	CCTCTAAGCTACACTACAGTT, GCTAATCATCTCCTATGGTAT, GCTCATATCACAGTAGTTCTT, GCTCCAAAGACTATTGCTGAT	4	7418, 90695, 2569, 42184	0.1199	654	0.0353	527	0	0	1	2
Ms4a4d	CAAAGAGTGAAGAATGGAGTT, GCTACCATCAAATTCTGCTGT, GCTTTCATAAACTTCAGCTTA, GTCTCTGCATTTGGGTGTAAA	4	11541, 5838, 30104, 6333	0.12	655	0.0353	524	0	0	0	2
Olfr414	CATGTACACCTTCAACTACAA, CCCAATATCATCAACCACTTT, CCTCACTTGTTCAGACAAGGA, GCAATTTATCTGTTGACGTTA	4	555, 59383, 8094, 84155	0.12	656	0.0353	525	0	1	1	2
Acadvl	CGGATGGCTATTCTGCAGTAT, CGGTTCTTTGAGGAAGTGAAT, CTTTGCCAAGACGCCAATTAA, GCGATCTACTACTGTGCTTCA, GCGGTTGATCATGCTACTAAT	5	27351, 57061, 40456, 1901, 6447	0.1203	657	0.0453	693	0	0	1	2
Odz4	CCGTGGGTTATGAGTATGAAT, CCTGTTACATACCTTCTACTT, CGCCATTGAATCAGTGGATAA, GCCCATTGATAATGGCCTCAA, GCTAACTTGTCTCGTGTGTAA	5	65530, 189, 38514, 7018, 49162	0.1203	658	0.0453	695	1	1	1	2
Olfr866	CATCTCTACTACCATCCCAAA, CCTTCATTACACAGTCCTTAT, CTTTGACTCAAACCTCCATAA, GTTCACATCTGTTAGTAGTTT	4	48269, 7830, 1420, 61110	0.1203	659	0.0355	530	0	0	1	2
Vmn1r214	CACAAGTACAAGACTGAATAT, CATCACAAGTACAAGACTGAA, CTTAAGAGTGATGACAACTAT, GAACATGTTTGTTTCTGTGAA, GCATTACTGATGCTTTCTTTA	5	1069, 6727, 86216, 90047, 68504	0.1203	660	0.0453	694	0	0	1	2
Ptpn2	CCGTTATACTTGGAAATTCGA, CCTGTCTTGTTCTGATGGAAA, CGGTGGAAAGAACTTTCTAAA, GCCAAGATTGACAGACACCTA, GCTAAATGAAACTGAACGAAA	5	2767, 35014, 46520, 12666, 6171	0.1205	661	0.0455	698	0	0	1	2
Nup210	CCCACAACAAATCGAGGTCTT, CCCATCTGACAACATCCGAAT, CCTTCCAAATTCTTTCGGAAT, CGCCTATCAGTATACCATAAA, GACTATCCTTGTCGCTGTAAA, GCCTTCTTACTGTGATAGTTA, GCTGACAGATAAGCAACTGAA, GGGACAGCAGTCACCATTATA, TCAATGCCTTCTGATCAATAT, TGCAATTACCATCGAAGTATT	10	28086, 75456, 76983, 63375, 11778, 25536, 63977, 38910, 3238, 2797	0.1212	662	0.0612	924	0	0	2	2
Taco1	CAAGGGCATTTATTTGCTATA, CGTTATCAAACAGTGGTCCCA, GCAGCAATCTCAGAGACTGAA, GCGCTTAACAACTATGAGGAT	4	8078, 89502, 67474, 870	0.1213	663	0.0359	534	0	1	1	2
Lamb2	CCACCTCATTATGACGTTCAA, CCTGACAGTATTGAAATGGTA, CGATCCTGACAGTATTGAAAT, GCATACTCATAGCTGCCACTT, GCTGAGAAACAACTACGGGAA	5	30899, 41911, 1863, 43149, 6518	0.1213	664	0.0461	702	0	0	1	2
Dis3l2	CCAGAGAGCAATGACAAAGAA, CCGACCTAAAGACTTTGCCAA, CCTGAAGGCAAGATCCTTGAA, GCTCGTAATAGAGCCTTAAAT, TGCTCGTAATAGAGCCTTAAA	5	79738, 5704, 23132, 4310, 26919	0.1213	665	0.0461	703	0	0	1	2
Prkab2	CATCGCTACAAGAAGAAGTAT, CATTAAGGACAGTGTGATGGT, CGCAACCCATCGCTACAAGAA, CGCTGCTGTATAAGCCCATCT, CTCTGATAAAGAGTCATAATG, CTTAACAAGGACACGAATATT, GATCTGAGGAGAGATTCAAAT, GTATGTCACCACGCTGCTGTA, TATGAGTTCACGGAGTTTATT	9	85482, 13666, 37800, 66479, 4375, 8421, 44712, 36183, 221	0.1213	666	0.0631	942	1	1	2	3
Rpgrip1	CCAGCAGCAATCCATACTTTA, CGCAAGCTACTCACGAAGAAA, GCAACCAACAAAGCAGCTCAA, GCAGGTATATGTGGAGTACAA, GCTTCTCTTCTTGTCAAGATA	5	6720, 1290, 9372, 36256, 74629	0.1215	667	0.0464	707	0	0	1	3
Thrb	CCATCCATCTTATTCCTGTAA, CCCAGCTATTTAGACAAAGAT, GCATCTATGTTGGCATGGCAA, GCCCAGTAGCAGCATATATAT, GCCTTTGAACACTATATCAAT	5	90988, 946, 32612, 40529, 6838	0.1215	668	0.0464	708	0	1	1	2
2012-03-02	CTGGTCTCTTTCCGATACCAT, GCCACCTCAATATGTAGCACA, GCTGGCTACTGGACTCTTAAA, TGGTCTCTTTCCGATACCATT	4	80963, 13194, 2741, 7476	0.1216	669	0.0362	537	0	0	1	2
Piwil2	ACTGAAGCAGGAGTATCTTTA, CAATGGAGAGGATCAACTTAA, CCAGTAGTATAGGCAGAGGAA, CCATCCTTGTAGAATTAGATT, CCTACACACTACATCTGTGTT, GACCGAATAGAGACCTATATC, GACTTGACTCAGCAGATTAAC, GCCGAGATCAGTATCAAGATT, GCGCTACAACAATCGTACCTA	9	31728, 4246, 80688, 48400, 69239, 90422, 638, 14998, 58560	0.1216	670	0.0634	947	0	1	2	2
Olfr490	CAGTCCTTAGAATTGTCCTAT, CCTACATTGCTGGGTTTCTTA, CGGAACAGTTACATTCATCTA, CTTTAGCTGAGCTCTCGTGTT, GCACAATTTCATACCTTGGAT	5	34697, 470, 15471, 7010, 75154	0.1218	671	0.0465	710	1	1	1	2
Prss50	CAGCAAGAAATGTGATCATTT, CCGTTCTTAAGACGGTTCATT, CGGTCCATCGAGTCATCATAA, TCGGATCATCAACCCTCAGAT, TCTGCTCTTCAGATGGCACAT	5	6495, 74270, 66533, 2029, 54775	0.1218	672	0.0466	711	0	0	1	2
Lrrc28	CCCATGTTTACCTTCGTCTAT, GCAGTACGTGTATGTGGATAA, GCGTCATCTTCGATTAGCTAA, GTACGTGTATGTGGATAACAA	4	46993, 8001, 40147, 1262	0.1221	673	0.0367	542	0	0	1	2
Olfr988	CCTTTGTTGATCTCTGCTATA, GCCCTATCATGCTCCAGTATT, GCTATTACTCCCAAGATGTTA	3	88863, 8192, 5011	0.1221	674	0.0281	408	0	0	0	2
Olfr890	GAAGGCTACATCATTAATCAT, GAGTTTATCCTGCTGGGCTTA, GCATCCATTCTGCAGAAGGTA, GCTCCCATTTCATAGCTGTTT, GTGGGTGTCAATGTCATAGTT	5	89097, 5356, 5403, 49821, 73505	0.1221	675	0.0469	714	0	0	0	2
Chic2	GAAACGAACAACATGATGGAA, GAAATGTGAAACGAACAACAT, GAATATGTCATCCTCATAGAA, GTATTTGGACTGAGCAACAAA, GTTATACCACAAGCTGTGCTT	5	73506, 6724, 33843, 1396, 58234	0.1222	676	0.0469	713	0	0	1	2
Gm5124	CTTTACCAAAGAAGTCCTCCT, GAAGTGAATGAGCAGAGAAAT, GCAGTGATGAGTCAGATTCAA, GTGATGAGTCAGATTCAAGTT	4	38517, 14920, 2848, 7481	0.1222	677	0.0367	545	0	0	1	2
Gtl3	CCGTATCCGAAGGGTTTACTT, CTTCATCTGTACCATGCCCAT, GCACGCAACAAACGGAAGAAT, GCCAGCAGAGTTCAAACTCTA, GTTCAGAACAAGGCCAAACAA	5	6309, 39793, 2663, 80397, 82718	0.1223	678	0.047	715	0	0	1	2
Parp1	CCTCTTAGTCTGCTGAGCTTT, CGGCCATCAAGAATGAAGGAA, GAGTACATTGTCTACGACATT, GCAAGAAATGCAGCGAGAGTA, GCCCTTGGAAACATGTATGAA, GGTTCATCTTTGCTTTAATTT, TCGACGTCAACTACGAGAAAC	7	14349, 52827, 38536, 55493, 735, 62717, 5277	0.1223	679	0.0517	784	0	1	1	2
Vill	CGTAAGGAGTTCTATCTCTCA, GACAAGTATGACATCATGTTA, GCAAATATGGATTACTGAGAA, GCTACCTTGTCCTCTACACAT, GTGTGGTACATCCAGGACTTA	5	30482, 32386, 48431, 3340, 6088	0.1224	680	0.047	716	0	0	1	2
Bpifb1	CTTGGCAAAGAATGTTATGAA, GAGGGTAACCAACTGGTTCAA, GCAAGATAAGTCTGGCAGTAT, GCACACCGTTCTGAGATACAT	4	60934, 7156, 65769, 3876	0.1224	681	0.037	549	0	0	1	2
Mal2	CAACGACAACCAGTATAACAT, CAGCTTGTTATGGTTGCAGTT, CGACAACCAGTATAACATCAA, GCTGAATTTGAGTAACAGATT, GTCTTCTACTTCGGAGCGTTT	5	5140, 17816, 8683, 5498, 42049	0.1225	682	0.0471	717	0	0	0	3
Sec22a	ACATCTCCCTTCGGATGATTT, ATGTTGTGCAGTGAGAATTAT, CCAGTGTTATTTACTTGTGTA, CCGTATTTGATAGCTCTCTTA, CGAGGCTTTCATGCCATAGAA, CGGCTTAATCTGTCTGTGCAA, GCTGTCTGCATCCACTGATTA, GTACTAAGTGTCAGATTATTG, TGTCTGCATCCACTGATTATG	9	22042, 3448, 58611, 51656, 58462, 53189, 4501, 3173, 69964	0.1229	683	0.0644	966	0	0	3	3
Serpinb6a	AGCAGTTTAACAAAGAGCATA, CCAGGTACAGTGAATTCTGAT, CCATGTTAAGACCAATGGAAT, GAGAATTACAACATGAACGAT, GCACACAGTACTTGCTCAGAA, TGACCTATATTGGAGAGATAT	6	80589, 67066, 1487, 74480, 5848, 52632	0.1231	684	0.0504	758	0	0	1	2
Gnai2	AGCAAGTTTGAGGATCTAAAT, CCTGCTCATTCTCGTAGCTTT, CTCACGAGAATACCAGCTCAA, CTTTGGCCGCTCACGAGAATA, GAGGATCTAAATAAGCGCAAA, GAGGTGAAGTTGCTTCTGTTA, GCAACCTGCAGATCGACTTTG, GCCGCTTACTACCTGAATGAT, TGTGTCGCCTTGAGCGCTTAT	9	3611, 73838, 80817, 30976, 34335, 87354, 45205, 2756, 28897	0.1235	685	0.0644	965	0	0	2	2
Pcdhgc4	CCACTTACCATTTGCCCTCAA, CCGTTCATGCTACTAGATCAT, CCTAGTGGTAACGTCACCTTT, CGTTCATGCTACTAGATCATT	4	53245, 6981, 88042, 4649	0.1236	686	0.0373	554	0	0	1	2
Tmco4	CCAGACTTCTGTATGCAACTT, CCGACATCTTTGCTCAGACTT, CGGCAGATACCGCACATTTAA, GCTACATATCACCATTGCCAT, GCTGTTATGACTTCACTGTTT	5	76712, 29863, 62654, 6949, 991	0.1237	687	0.0478	722	0	1	1	2
4931428L18Rik	CATGGCAACAAAGTAGCGGAT, CCTGCTTCAGACACTCATCTT, GATAGAGATCCTGACTCTCAT, GTTCATACTTCTTCATGGCAA	4	67430, 4606, 7003, 76615	0.1237	688	0.0373	553	0	0	1	2
St3gal2	CCAGATTTACAACCCAGCCTT, CCGAACAACTCACCATTTCAT, CGTCTGGACCAGAGATAACAT, GAATGGTTTGACAGCCACTTT, GTGCTCTTCTTTGCACTACAT	5	64228, 6503, 67253, 2396, 80628	0.1241	689	0.0482	728	0	0	1	2
Apool	CCGTACTACAACCGTGTATTA, CCTGAAACATTCAGTGTCTTT, GAGAACTGCAAGATGTACCAA, GCATCTATAAATGTGCGTCTT	4	3445, 92058, 7413, 36450	0.1241	690	0.0376	560	0	0	1	2
Epx	CAAGCCTTGAAGATGAGGGTA, CGAATCTCTTTATCTCGGATT, CTCGGATTGTATGCGACAATA, GCCTACAATCACACACAGAAA, GCTCCGTAATAGGACCAACTT	5	5696, 88085, 69047, 91739, 4831	0.1241	691	0.0482	726	0	0	1	2
Mnx1	ACACCAGTTCAAGCTCAACAA, AGAAGAGGACAACTTCCCGTA, CGCGTCTACTGCGGGCATGAT, GCCGAATGAAATGGAAACGCA, GCTTTCCTACTCATACCCTCA	5	6209, 3308, 73728, 56273, 69314	0.1242	692	0.0482	729	0	0	1	2
Unc45b	CGATGGGAATGATCGTCTGAA, CGCACCATCTATGTTGTAGAT, GCAGATCTACAAGACCACAAA, GCCACCCGATTTCAATGGTAA, GCTGACATCAAAGCATTGTAT	5	82286, 1326, 6874, 51673, 15877	0.1243	693	0.0483	734	0	0	1	2
Clec4g	CCAAGGTTCCTGCTACTATTT, CCCAATGATTCCAGAGGACAT, CGCCACCTCAACAAGATTCAA, GCGGAGTTTAAGGACATACAA, GCTCTAACTCACAAGACAGTT	5	12443, 7769, 32122, 1983, 6661	0.1244	694	0.0483	731	0	0	1	3
Cox6b2	CGAGTACTATTTCCGTGTATT, CGGTGTGTGAAGACCATGAAT, GCAGATCAAGCAGGGAACTTT, GCGTAACTGCTACCAGAATTT, TGCGAGTACTATTTCCGTGTA	5	13066, 60633, 4396, 5865, 83142	0.1245	695	0.0483	735	0	0	1	2
Ccdc101	AGATCGCAGGTCTCTACAATG, AGTATGAGGTAGACGACATTG, CCTAGCTGAAGTAGTCAGTTA, CTGTTTGAAGACACCTCTTAT, GAGAACAAGATTTCTCCTTAT, GCTGGATAAGATAGCTGAGAT, GCTTGTAAGGAGCCCAAGAAA	7	45380, 53164, 4875, 2269, 50215, 77724, 61871	0.1247	696	0.0538	814	0	0	2	2
4933402P03Rik	GATGTCACAGATGAGGCCAAT, GCCAAATCAGAACTGAGGCTA, GCCATAGACAAGATGATCTTT, GCTGCGAGCAATACCAAGAAA	4	63825, 5024, 83104, 6934	0.1248	697	0.0382	568	0	0	0	2
Pcdhgb7	CGAGGGCATCAATGCAGAATT, CGGCACTGTTGGCTAGTATTT, GCCCAGAAATAATCATCACTT, GCGGAAACAATCCATTTAAGA	4	4779, 7041, 67519, 83472	0.1251	698	0.0384	572	0	0	1	2
Hspa14	CCATTACTGTTGAGGTTGCAT, CGTGATATATTAGCTGTTCTT, GCCAAGTTTGCACAGGTTGTA, GCCAGACTGATATTCAGTAAA, GCTCAGAAATACATCTCAGAA, GTGGACCTCCTCAACTCTATC	6	6299, 87985, 455, 49122, 47045, 12817	0.1252	699	0.0513	777	1	1	1	2
Raet1d	CACAGTAAGCTTCACAATAAA, GAAAGATTTGTGCCAGAAGTT, TCCTCCATTTAAGTAACATAA	3	36427, 7844, 6851	0.1253	700	0.0292	421	0	0	0	2
Olfr209	CCTTGGCTTAATCTTTCTCAT, CTATCAATGTACTGGTAGCTT, CTATGGCACTCTCTTCATCAT, GACACCAAAGATGCTTATGAA, GTAGCTTTCATTATGGCTATT, GTATTCAGTTCATAGGTGTAT, GTGAGTACCTTTATGAGTATT	7	8149, 2963, 4692, 15976, 63022, 64740, 62426	0.1258	701	0.0545	829	0	0	2	3
Slc2a2	CCTCAGCTTTATTCTGGGCAA, GAAGTGTATCAGGACTGTATT, GCACCTCAAGAGGTAATAATA, GCTCAGATTATCAGTTAGTTA, GCTGGATAAATTCGCCTGGAT	5	89357, 12645, 49446, 1732, 6831	0.1259	702	0.0491	745	0	0	1	2
Loh12cr1	CGATCAGAATGCTCTAGTCAA, CTCTCTGATCTGTGGCTGTAA, GAGCAGATCCAGAAGGTGAAT, GCGAATCAAAGAGATGGATCT, GCTCTAGTCAAGCGAATCAAA	5	15218, 2968, 8378, 6424, 75910	0.126	703	0.0492	746	0	0	1	3
Dtnb	AGCTCCATTCAGGAGAGGTTA, GCATGTACTAGCATCCGCATT, GCCATGCAATTAGTAAATCTT, GTCCATCTACTATCAGTTGAA	4	6786, 61238, 92316, 5729	0.126	704	0.0388	575	0	0	0	2
Prmt3	CCTACGGTTGAATATATGAAT, CCTCATTGTGACCCTGACTTT, CCTGCTAGACTGAGAGTCATT, CGCACAGAAAGTTACAGAGAT, GCACAGAAAGTTACAGAGATT	5	51204, 3479, 43517, 83833, 6262	0.1261	705	0.0492	747	0	0	1	2
Slc17a6	CCACCAAATCTTACGGTGCTA, CCCTCAATATGCTGATCCCAT, CCGTCTTCATTCAGGCCATTT, CCTGCAAAGCATCCTACCATT, GCCCTATCATTGTTGGTGCAA	5	32518, 13495, 27353, 5657, 5345	0.1264	706	0.0494	749	0	0	0	2
Itih3	CCCTCAAGTACCACTTTGTAA, CCCTTTGTATAACCTGGGTTT, CGGACAGATCATCGGAGATAA, CTACTGGAGAAACGCAAGAAT	4	25907, 8085, 31799, 1913	0.1264	707	0.0391	577	0	0	1	2
Gsta4	CAAGTACAACTTGTATGGGAA, GAACAGTATGAGAAGATGCAA, GAGTCAGGATTGACATGTATG, GATTGCCGTGGCTCCATTTAA, GCAGGCATTTAAGACAAGAAT, GCTATGATTTGATACTGTCAA, GCTGCCAAGTACAACTTGTAT, GCTTTAAGGTGGCACCCACAA	8	24731, 4271, 41624, 8730, 28853, 28455, 2583, 50577	0.1267	708	0.0591	883	0	0	2	3
Psme2	ACTCTCAAAGAGAAGTGCATT, CAGGTGGATGTCTTCAGACAA, CATATCCCTGAGTCAGCTCTT, CCAAGGATGACGAGATGGAAA, CCCAAGATTGAGGATGGAAAT, GCCTTGGTGCATGAGCGAGAT, GCTGTCAAGACCAAAGTAGAA, TGCACTTTCTTGCCACGGAAA	8	1818, 77579, 66882, 4882, 84519, 56106, 4526, 61563	0.1267	709	0.0591	885	0	0	3	3
Cmah	CCCAGTTCATTAAGGCTGAAA, CCTCATTTATATCAGCCACAT, CGTGGAGTACAAAGGTCATAA, CGTTAAATGCACAAAGCACAA, GTGGAGTACAAAGGTCATAAA	5	19967, 6362, 74488, 77775, 3296	0.1268	710	0.0495	750	0	0	1	2
Hapln3	CAATGGCTTCTACTATTCCAA, CCTATTCAATGGCGTGAAGTT, CCTGCATCGTTATGATGTGTT, CGTTATGATGTGTTCTGCTTT	4	8228, 1610, 69089, 65811	0.127	711	0.0392	579	0	0	1	2
Ripply3	CCGTTTCAAAGCGTCAAGAAT, CCTGAGTTCAATTCTCAGCAA, GCATCCTGTCAGACTTTACTT	3	77242, 5770, 8345	0.1271	712	0.0299	427	0	0	0	2
Tceal5	AGCCTTTCCTTCTGGATTCTC, CTTAGAAGATGCTCCATTTGT, GAAGACGAAGGAAGTACAGAA, GAAGGAAGTACAGAAGAGGGA, GAAGTACAGAAGAGGGAGGAA, GCAGAAGACGAAGGAAGTACA, GGATTCTCTGATGGGAAATAT, GGGCCAGAAGGACTTAGAAGA, TGTTTAATGCCTTCAGCCTTT	9	42436, 4122, 91167, 86274, 20401, 18447, 20230, 25725, 1630	0.1273	713	0.0671	1011	0	0	2	2
Olfr362	CAATGTTAAACTTCCTCACTT, CGACAAATTTGTGCCCGGTTA, CTCACCTATGTATTATCTCTT, GCACAATCATTTGGGTCTATT	4	6312, 23073, 53950, 6690	0.1275	714	0.0395	585	0	0	0	2
Gsdmc3	CCAGTGGGAATAAAGATGCTA, CCTCCATTCTTGTGGAATGTT, GCAACCCATGTGTTGACCTAA, GCTCAGTGATAGCCAACTCAA	4	53086, 8481, 17217, 950	0.1275	715	0.0395	583	0	1	1	2
Akap8l	CCACAAGGAACACTTCAAATA, CCAGAACATCATACCCGAGTA, CCCACCTGTGATTATGGATAT, CCGAAACCACTTTGCAGTCTA, CGAGAACTATGGTTATGGCTA	5	7701, 3727, 6265, 76824, 28018	0.1276	716	0.05	754	0	0	1	3
4933427D06Rik	CAACATAGTCCCGTGCTTCAT, CATGAACCTGTATCCCACCTT, CCACTAGAGTATGGATAACTA, CCCTATGTTACCTTCATCCCT, GAGGAAACGATGAAGAACAAA	5	7064, 22656, 19319, 36239, 1341	0.1276	717	0.0502	756	0	0	1	2
Tdp2	ACATTCTGCGGAACGAATAAG, CAGATTCAACCACGGTTATAT, CCCATACTGTGCCTACCTAAA, GAAACCTGCTATGCGTAAATG, GATGGATTAGATGGATGCAAT, GCAATGATTAAACCCAGCTTA, GCCGTGACCAACCGTAGTAAA, GCTGTTGTATATCAGACTTAA, GTTATCAAATGTGGTGGTTTA	9	77236, 3271, 3600, 64437, 40050, 48890, 38847, 38661, 46960	0.1279	718	0.0675	1016	0	0	2	2
Uqcrc1	CAATGCCATCATAGGCCACTA, CCAGAGTTTCCAGACCTTCAA, CGAGAAGGAACGAGATGTGAT, GCACACTGCTTACCTCATCAA, GCGTGACATTTGCTCCAAGTA	5	26969, 7032, 6185, 4066, 63820	0.1281	719	0.0502	757	0	0	1	3
Gpm6b	CATCTGCAACACGAATGAGTT, GCCAGTGTTTATGTTCTACAA, GTCTTCTAACTGGGCTTACTT, GTGATCCAACTGATGCAGTAT	4	84738, 35652, 4817, 7239	0.1282	720	0.0396	588	0	0	1	2
Opn1mw	CAGCACTATCAGTGTTGTGAA, CCTACCATCCTACTTTGCCAA, GCAGTGGCAAAGCAACAGAAA, GCATCTTACATCTCTTTGGAA, GTCTTTATGAACCGGCAGTTT	5	5863, 5067, 19293, 21314, 44620	0.1283	721	0.0505	761	0	0	0	2
Vegfa	CGAGATAGAGTACATCTTCAA, GAGCGGAGAAAGCATTTGTTT, GATCAAGTTCATGGATGTCTA, GCAGACCAAAGAAAGACAGAA, TGCGGATCAAACCTCACCAAA	5	73898, 2077, 40988, 8327, 6861	0.1283	722	0.0505	763	0	0	1	3
Larp4b	CAGCAGGCTTACAAATACCTT, GAACGAGTAAAGACCCTTCTT, GATGTGGATTTGATTGTTGAA, GTTTCAGAGCTAAACCCTAAT	4	7184, 5023, 45013, 47007	0.1284	723	0.0399	594	0	0	0	2
Sdhb	CCCTGATTTGAGTAACTTCTA, GAAAGCGATTGCGGAAATCAA, GACTGGAGATAAACCTCGAAT, GCAGTTCTCATGCAGGCCTAT, TCTGAATAAGTGCGGACCTAT	5	6749, 35357, 2437, 74165, 47683	0.1285	724	0.0507	765	0	0	1	2
Pxmp3	CAGCCCTTGAAATCAGGAATT, CCAGAAGTTGAAAGCCAAATT, CCTATGGAGGTTCACCATCTA, CCTCACACTATTGGATGTGAA, CCTTGGCATTCATTCCGTATT	5	83535, 4280, 14899, 22922, 6138	0.1285	725	0.0507	766	0	0	1	2
Dnajb3	CCCTTTCTCCTTCGACTTCTT, CGTTAGATACTGGATTCACAT, GCAACTACAAGTCGGTGTCAA, GCTTCGCATCAATACTCAGTA, TCTACTTTCAGAACAACTGTA	5	78991, 6769, 17748, 2420, 37554	0.1287	726	0.0507	769	0	0	1	2
Slc7a4	CCTAGCTCACTATCCAGATTT, GCATTCCTCATAGGCTGGAAT, GCCCTATGCTATGCAGAGTTT, GCTGCCTACTTAAGGAAGCTT, TGGCTCTATCTGTGCCATGAA	5	6220, 75746, 4080, 30400, 87595	0.1288	727	0.0507	767	0	0	1	2
Cln3	CCACAACAGCTCATCTCGATT, CGTGAATACCTTCCACAACAT, CTGCTGCTAGCCAGCTATTTC, CTTCTCTCCAATGTTGCCGAA, GCCCTTCTAATAAATGCTTAT, GCTTCTTGGATCGCTGTCTTA, GTGACAAGCACCGAGAGTTTG, TCACGTCTGACTGGGATATAC, TCTTGGGTCTTTGCAACAATT	9	41115, 39755, 76999, 74421, 3750, 31130, 57754, 60498, 2927	0.1289	728	0.0684	1030	0	0	2	2
Camk2a	AGTCAGCCTGCATCGCCTATA, CCTGGACTTTCATCGATTCTA, CGCAAACAGGAAATTATCAAA, GCGTTCAGTTAATGGAATCTT, GCTGATCGAAGCCATAAGCAA, GTGTTGCTAACCCTCTACTTT, TGGACTTTCATCGATTCTATT, TGTTGGCCTAGCCTAGCTTTA, TTCGCAGAGATCCGCTCTTTG	9	50303, 58082, 53301, 3159, 61842, 3677, 29844, 80869, 74635	0.129	729	0.0685	1034	0	0	2	2
Bzw2	CCGAAACTATGCTCAGGTCTT, CGATTAGATTACCGTCGCTAT, GCATCATGAATGCGGTGGAAT, GCCACTTCAATAGTTGTGTTT, GCGATACTGAAGTGGTATAAA	5	4900, 33024, 68332, 5960, 8834	0.129	730	0.0507	768	0	0	1	3
Paqr3	CCAGACAACTAACAGAGCTAA, CCTCTACACCTATGAACAGAT, GAACGGTACTTTCCAGGACAA, GACAACTAACAGAGCTAAGAA, GTAATTGTGATGTACGTGATT	5	2019, 6925, 82691, 25139, 38888	0.1291	731	0.0509	771	0	0	1	2
Gnb4	CGACAAATAAGATGCACGCCA, GCCGAATACAAATGCGAACAA, GCGTTCAATAAGCTGTAGTTT, GCTGGTTCAGATCACGTCTAA	4	4170, 7524, 27315, 9346	0.1292	732	0.0402	602	0	0	1	3
Card14	CACAGAAGTTAGTACGAATTG, TAAGGGCCACTCTGGAGAATA, TGTGGAGTCCCTCATGAATAT	3	6505, 23516, 8272	0.1292	733	0.0309	452	0	0	0	2
Olfr350	CCTGCTCATCATCCTACTCAT, CTGTATCTTACTCGTAGCTAT, GAGTGTATAGCACAGATGTAT, GTCTCTGTATTATGGTACAAT	4	8484, 17848, 1298, 59583	0.1292	734	0.0402	605	0	0	1	2
Wnt7b	ACCCGATGCCATCATTGTGAT, CGGAGCATTGTCATCCGTGGT, CGGCTCTGTGAAATAAATATA, GCAGCTACGCAGCTACCAGAA, GCTACCTAAGTTCCGCGAGGT	5	24652, 23904, 77671, 4999, 5940	0.1292	735	0.0509	772	0	0	1	2
Yaf2	CAAGTGCATGATGTGCGATGT, CAGTCGAAGAAAGAGAAGAAA, CCAGTCGAAGAAAGAGAAGAA, GCAGTGTTATTGGTAAGTCTA, GTTGGAGATCTAACAGTCATT	5	7242, 1138, 70384, 46409, 19953	0.1295	736	0.051	773	0	0	1	2
Ltbp4	CAGATGACTTTGAGGCCCTTT, CCGGGTCCTATGTCCCTTGAT, CCTATGAATATGGCCCAGATA, CGCTGCCCATTCTTCGAAATA, GATGTACTGATGTGGATGAAT	5	84088, 78348, 5048, 5939, 28468	0.1295	737	0.051	774	0	0	0	2
Gfra1	AGATTCTTCCGGATCTTATTT, CAGATCTCGCCTTGCAGATTT, GAAGCAGAAGTCTCTCTACAA, GCAGACTCTATCTTGTACTAA, GCAGTACACATCTCTGTCTTT, GCAGTCCCGTTCATATCAGAT, TGTCTGTATCATTGGCAGAAA, TTACCACCGTGTGCTAATTTG	8	52421, 61081, 27234, 4695, 17213, 1647, 19558, 84712	0.1295	738	0.0612	925	0	0	2	2
Ngfrap1	ATGAGAGAGATCCGGAGAAAG, ATGCCTTGACTTCGGTCATTC, CATTCCCAACAGGCAGATGAA, CCACGATCACCATGATGAATT, GCCAGCTTCTAATTGGAGATT, GCTGAGAAATTGTCTACGCAT, GTGGTGAGCCTTGTGTTATTT, TGGAGATGATATGGAAATGTT	8	142, 18640, 23999, 21732, 63221, 5203, 68681, 26798	0.1297	739	0.0613	927	1	1	1	2
Ahsg	GCAGAGAGGTAATGGTCAAAT, GCCGTGGACTACCTCAATAAT, GCCTTCAACACACAGAATAAT, GCTGCCTTCAACACACAGAAT, GTCTTGAATCAGATCGACAAA	5	1590, 54534, 7106, 58025, 31181	0.1297	740	0.0511	775	0	0	1	2
Pim3	AGAACTGTGACCTTCGGCTTT, CCAGTGAAGATCCTACAGCCA, CGACGGCTTCTTGTTGGTGCT, GCAGCTTATTGAGTGGTGTCT, TGGATCCGATATCACCGATAT	5	32725, 85018, 62524, 3192, 6575	0.1298	741	0.0512	776	0	0	1	2
Rnf19b	CAGAAGAGTATGAAGTGGAAT, GCACAAGAGGAATTTGGCTAT, GCTACCACTGCAAGCAGATAT, GCTGCTGTTAGCGTTGGTATT	4	8384, 44444, 49425, 1760	0.13	742	0.0408	610	0	0	1	2
Afg3l1	CCTGGTTAGCATCCTCCTATA, GAAACACTTCGTGCAGTATTA, GCAGCTGTTCTTTGGTCAGAT, GCTTCACTGGTGCTGATATTT, TCCACTAATGTGGTAGTGTTA	5	50607, 3752, 28466, 6404, 7036	0.1301	743	0.0514	780	0	0	1	3
Wdyhv1	ACAGCTGCTATTGTGAGGAAA, CCCAGCCTCAGACATAGATAT, CCTACTTGAAGCACTTCGCTT, GCTATGCAGTCTTCATATCAA, TGAGTACATCAAGACACACAA	5	57157, 18211, 7616, 61763, 132	0.1301	744	0.0514	781	1	1	1	2
Pdzd3	CCGATGTCTAAACATAGAGAA, CCTTCTACTGTGGATACCTTA, CTCACATACAACCAGCTCAAT, GCCTTGTTAACTCTGAAGTTT, GCTCACATACAACCAGCTCAA	5	7581, 32510, 82038, 241, 15236	0.1302	745	0.0514	778	1	1	1	2
Pi4k2b	ACTTGATTCTACCCTATATTT, AGAGCGGACAGTGATAGTAAA, ATGATAACTGGCTAGTCAAAT, CCTGATGAATGGCGAGCATAT, CGAGCTCAGAAACAAATACAT, GAGGAATCAAACTGGATTGAT, GCTGTTTGTGAAAGATTACAA, GTGGACCAAGTACGTCCATAA	8	24619, 4966, 31607, 80695, 54780, 924, 87374, 80270	0.1303	746	0.0617	928	0	1	2	2
Ndufa10	CGGATCTACAACAGCTTCAGA, GCAATGTACAACCAGGGCTAT, GCAGCTGTAGTTTAGAGAAAT, GTGCTGAATTACACGACCATT, TCTTGGTGATAAGACAACCAA	5	85260, 4677, 7372, 6108, 15994	0.1303	747	0.0516	783	0	0	1	3
Ccdc61	CATTGAAGACTTGACTCATAA, CCAAACGCTACCTCATTCTCA, GAACTTTAAACAGTTCAGCAT, GAGGATTTCTCCCACTCAGTT, GTGGTATTCTGATTTCTCATT	5	3410, 14239, 67232, 30210, 6532	0.1303	748	0.0517	785	0	0	1	2
Ddx41	CCGCATGATTGACATGGGCTT, CCTTGATGTCAGTGAAGGAAA, GCATCACCTATGACGATCCAA, GCATGTCATCAACTATGACAT, GCCAAGATGGTGTACTTGCTT	5	6897, 26189, 80737, 2345, 85335	0.1305	749	0.0519	787	0	0	1	2
Fgf23	CGACCCACTGAACGTGCTCAA, CTGCTGCATTTCTACACTGTT, CTTGTCGCAGAAGCATCACTA, GACTCGAAGGTTCCTTTGTAT, GCTATCACCTACAGATCCATA	5	45449, 46473, 79266, 1565, 7158	0.1305	750	0.052	789	0	0	1	2
Rab33a	AGTACGTGCAGATTCGCATTT, CAAGGTGCTTGTGGGTAACAA, CAGTACGTGCAGATTCGCATT, CTCCAACTTAGCCCTGAAATT, GAAATTTGCTGACGCTCATAA, GACCTCCTTCACCAACTTAAA, GCCGACTTAAGGCCCAGAAAT, GCTCATAACATGCTCTTGTTT, GGCCAAGAACGCTTCCGTAAA, TGACCTCCTTCACCAACTTAA	10	34428, 47974, 30021, 45835, 22982, 1112, 81425, 88506, 8444, 4124	0.1306	751	0.0703	1054	0	0	2	3
Olfr714	CTTCCTGGCATTTCTCACCAT, CTTTCTCAGGAACTTATCCTT, GCAGCTTCCATCCTCAAGATT, GCTGTGCCACTCAGATGTATT	4	56206, 12240, 7522, 4517	0.1308	752	0.0411	619	0	0	1	2
Itga10	CCCTGAGATAGATCCAAACAA, CCCTTATAGGACTCTCCCAAT, CCTGCTGTGAATATGCACCTA, CCTGGTCAGAAGTTCAGACTT, CCTGTCACTATCTCAAGTCAT, CGAGGTTTAGACATCGAGGAA, GCGTTGGGATAGAAGATTCTA, GCTTCCAAGTAGTGTCTCAAA, GCTTCCTGTTAGAGTTTGAAT, GCTTGGCTTCTTTACCCGTAA	10	26696, 2149, 64866, 78430, 25939, 64669, 17319, 47084, 81773, 3789	0.1309	753	0.0706	1061	0	0	2	2
4930504O13Rik	CTTTATGCCCTTCTCTACAGA, GAAATGCATAACCATAGAACA, GAAATTACGATGAACGAGATA, GCTGATGAAATGCATAACCAT, GTGAAATCTGTAAGTCAGCCA	5	33674, 768, 11472, 7454, 10254	0.131	754	0.0525	795	0	1	1	2
Kbtbd7	CAGAGTTTCATCACTGAGGAA, CCGATTATTCATCTGCACAAT, CGAGTCACAGTATATGAGTAT, CGATTATTCATCTGCACAATT	4	60994, 19125, 8582, 1380	0.131	755	0.0411	615	0	0	1	2
Hrc	CCTACTACCTTTCACCATTAT, GAGGACCTATCAACTGAGTTT, GATGAGGCTGTATCCACTGAA, GCTCACAGATATCAGGATCAT, TCTGGTGAATACAGACACCAT	5	7460, 762, 63909, 80402, 52906	0.1311	756	0.0525	793	0	1	1	2
3110056O03Rik	CCACTGCTCTAAGCCAGTAAA, CCAGTCATGATCTGCGTGTTT, GCAGTCCTCCAGAATTTACTT, GCCTACTGTCACAGGTTTGAT, GCTTGTGCTTCTCTACTACTT	5	64415, 6029, 89116, 5056, 10223	0.1311	757	0.0525	794	0	0	0	2
Psmb10	AGGAGGCTTCTCTTTCGAGAA, CAATGTGGATGCCTGTGTGAT, CGGGCCACTAACGATTCGGTT, CTGCGAGAAGATCCACTTCAT, GCTTCCAAGATGGAACTACAT	5	9072, 4212, 75380, 6316, 86460	0.1312	758	0.0525	792	0	0	1	3
Tceb2	CACCATCTTTACGGACGCCAA, CAGCTCCTTGATGATGGCAAA, GAGCACCGTGTTCGAACTGAA, GATGTGATGAAGCCACAGGAT, GCCACAAGACCACCATCTTTA, GCGGCTTTACAAGGATGACCA, TTCCGAGCAGATGACACCTTC	7	30408, 9795, 57346, 311, 7399, 5825, 69231	0.1313	759	0.0581	868	1	1	1	4
Olfr452	CATGGTTTCTAGCATTGTCTT, CCATCAATTCTCTTGTGCACA, GCTGCCCATGTGCACAAATAA, GTCCTTCAAGAGAAGTTGATT	4	49853, 158, 9010, 57332	0.1313	760	0.0416	628	1	1	1	2
Zfp637	AGGTCTATGATTGCCAGGAAT, CAGAGGAGCTTCCGAAATCAA, CATGGAAGATACGCCCAGAAT, GCCCACAAGTATGATCCTTCA, GCCCTCAGTAATCAAGAGTTT	5	3974, 89957, 69830, 69502, 6408	0.1314	761	0.0526	796	0	0	1	2
Cd55	CCCAACGAAGAAACCAACAAT, CCTGGTTGGAAATGCTAGCAT, CCTGTTACCAAGACAACAGTA, GTCACAGGAAATACTGTTGAT, GTCATCCAATAAGAACATCTA	5	4830, 65466, 72890, 6127, 19811	0.1315	762	0.0527	797	0	0	1	2
Olfr1232	CAGTGGGTTGATCTGTATTAT, CCCAGAATCCAAATCTTCAAA, GCTTGTCTCCTATGGCTTTAT, TCATTTCATGTGCGACTTATT, TGTTACATTCTACTGTGCAAA	5	8043, 64664, 6045, 5116, 42254	0.1317	763	0.0528	798	0	0	0	3
ORF61	CATCCTCATGTCCAGTGTAAA, CCAACAGCTCCATCAAGTTTG, GTGGAGTACTCACTGGAATAT, TGCCTACCACTACCGCTTTAA, TGTCATCATGGTCATCTTTAC	5	84822, 31180, 7406, 61536, 1088	0.132	764	0.0531	800	0	0	1	2
Avl9	ACTTCATTCTGAGCCTAATTA, AGTCTACTTCTGACGTCTTAA, CAGTGATTCTGGCCGATATTT, CCGGCACTTTCAGAGATAAAT, TATCTCTTGTTATCGACAAAT	5	33157, 3466, 6614, 70381, 83589	0.132	765	0.0531	799	0	0	1	2
Cmtm7	CCATAGTGATAGCCTCCAAGA, CCTGATAATGATCCTCATCTT, GCACTATTTAATCGGCACGCT, GCCTGTCAATCTGGTCTTGAA, TCACCTGTATAACCCAGTCTT	5	63813, 15328, 15971, 5644, 5891	0.1321	766	0.0532	801	0	0	0	2
Cln8	CACCACCTCTTTGCCTTTCTT, CCAGTGGCTAATGATCCACAT, CCCGTGCTCTATGCCGACAAA, CCCTTACTGGACACACAAGAA, GCCCTTACTTTGTGTTCCTAA	5	4129, 81184, 38553, 6405, 16530	0.1322	767	0.0532	805	0	0	1	2
Dio1	CGATTTCCTCATCATTTACAT, GACCAGTTCAAGAGACTCGTA, GCCGAAAGATTGAAATCTGTT, GTGCAACATCTGGGATTTCAT, TGGAACTACAATCCTGAGGAA	5	6460, 19863, 34579, 69697, 3968	0.1322	768	0.0532	803	0	0	1	2
Chst1	AGGAGCCTTTATGATTGTGAT, CCGCCAAGTCTTTCCACACTT, CCTGGCCAGAAATCCAATGAA, GCAAGTACATGCTGGTACGTT, GCCGTCTTTAACTGTTGCCTT	5	1746, 8838, 39872, 7201, 74606	0.1322	769	0.0532	802	0	0	1	3
Hdgfrp2	ACAAGAGGAAAGGCTTCAATG, AGTCTGCCAATGATGACAATG, CAGTCTCTAAACGAGCTAGAA, CTATGATAAGTGCAAGGACAA, CTGCAGGTAACCTCTCAGATT, GCTGAAGAAGATTCGCCGGTA, TGAATGGAAGAGACGTGATGA, TGTCAGTCTCTAAACGAGCTA	8	42905, 55528, 62889, 4847, 59370, 73312, 1533, 44967	0.1323	770	0.0632	945	0	0	2	2
Rps19bp1	CAAGACGAAGAACAAGAAGAA, CACTGAAGAAGACTTCCAGAA, CCTGAAGTTTATGACCAGCAT, GTTTATGACCAGCATGAGAAG	4	48237, 56485, 7422, 5166	0.1325	771	0.0423	640	0	0	0	2
Mesdc2	ATATCACAGTTACCGTATAAA, CGATTACAACGATGCCGACAT, CTATGACGTTCAGAGGTTCAT, CTCTAGAGGGACAGATGTATC, GCACCTATCGACTTCTCAAAG, GCCTGTTCAACGCCAACTATG, GCTTCCAAGGAAGACAATCGA, GTGGGAGAAAGATGATGACAT, TGTTGCTCCCTCCTCCTAATG, TTGTTCAGTGAGTGAAGATAA	10	79533, 26799, 42962, 50987, 70988, 57000, 19603, 4225, 16133, 1020	0.1326	772	0.0718	1076	0	0	2	2
Lpar3	CTAACTTAGCTGCTGCGGATT, GAAGACAGTGATGACCGTCTT, GCGTCAAATATGAGCACGATT, GCTTACGTGTTCCTGATGTTT, TCCCATTTACAGTAGGAGTTA	5	6471, 4011, 67508, 38187, 79965	0.1327	773	0.0533	807	0	0	1	2
Zfp799	CCTGTCTATGAAGAAGTAGTT, CCTTCTGTAGTCGCATATCAT, CGCCCAGTATTCTTACAGAAA, CTTCAATACCACGAGTTGATT, GCTCCGTTAAGTACCATGAAT	5	2448, 91618, 29912, 49163, 6994	0.1327	774	0.0533	806	0	0	1	2
Pnkd	ACCGATTGAAGCAGATGAAAG, CAAGGACCGATTGAAGCAGAT, CCACAGCTCACCAGAATGCAA, CTCTGGAGCCACAGCTAACAA, GAAGTGGACAAGGACCGATTG, GCAACCTTGTGCTAGACTATT, GCAGATGAAAGCTCGTCAGAA, GCTAGAATACATTCCCAGAAA, GTGAGGATCACTGCAACCTTG, TGTCCAACACGGGCGAGTATG	10	4759, 2001, 3900, 60215, 27091, 46426, 61443, 23023, 54076, 80137	0.1327	775	0.072	1081	0	0	3	3
Six4	ACACAATGGAGTTATCCTTAA, AGACTATCATAAGGGTATATT, CCCGTGCAAATTAACCAGTAT, CCTCCCAGGATGTGAAAGAAT, CCTGTCTTCCTTAATGGCAAT, GATGAAGACATGCAAGACTTA, GCAGCTTCACAAGGTAATCTT, GCCACGTGGAGCCAGTATATA, TAATGATGTTAGACTCGAAAT, TTACTACACCCGTGCAAATTA	10	8010, 85186, 58971, 82021, 23368, 1267, 4149, 53478, 46424, 27373	0.1328	776	0.0721	1083	0	0	2	3
Crybb2	CAACCTGAAGGAGACTGGTAT, CCAACTTTACTGGCAAGAAGA, CCCATCAAAGTGGACAGCCAA, GAGCACAAGATCATCTTATAT, GCGAGCAGTTTGTGTTTGAAA	5	6483, 4026, 22079, 91406, 35892	0.133	777	0.0536	811	0	0	1	2
Rarres2	CTTTGTGAGGTTGGAATTTAA, GCACAATCAAACCAAACGGGA, GCACCTTTGTGAGGTTGGAAT, GCCCGAACTCAGCGAGACCCA, GCTGAAGAAGTGCTCTTCTCA	5	6139, 22309, 6000, 5486, 84009	0.133	778	0.0536	810	0	0	0	3
Gm5334	CCAATGCTGTACGGAATTATA, CCAGTTGATTGGCGTGAGGTT, CCGTGAGATCAAGAACAGATT, GCAAGGATGAAGCTGACTGTA, GCCTGTTTCTAAGAAGAACTA	5	5318, 43942, 70667, 6062, 62535	0.1331	779	0.0536	812	0	0	0	2
Wipi2	CCTGCTTATGAATTTAGCTTT, GAAGGGAACTGAGATATGCAA, GAGATTGTTCTCAAGCAGCTT, GTCGCTCTACATACACAACAT	4	78046, 78873, 2152, 8479	0.1333	780	0.0425	643	0	0	1	2
4930474M22Rik	CCACTGTTTAGATGGACTTTC, CCGATCATAGAACATATCTAA, GAGAATCAGACTGTCAGTCAA, GATTCCAGGAAAGTGGCAAAT	4	5471, 8297, 12083, 7373	0.1333	781	0.0426	647	0	0	0	3
Gp5	CATCGTGTTTGCCATGATTAA, CCAGCTGTTTCGAACATTAAT, CCCTCTCTTCAGAAGTAGCTT, CGAATGGACCAGGGCATATTG, GAACCAGAATCAGCTCTCTTT, GCACCTTCAATGACCTGGTAA, GCTCAAGTTAAGCTTGAGAAA, GGCCAGCTGTTTCGAACATTA, TAGTAGCCCAGGCCATCATAG, TGGCGTGCCATTACACTATTT	10	54053, 4184, 77027, 44889, 2819, 13584, 3650, 60950, 16725, 65058	0.1334	782	0.0726	1090	0	0	3	3
Itgb6	AGAAGATTTCTGCTAATATTG, CCCGCATAGAAGTCCTTCAAA, CCCTCCTATTATTCCACATTT, CCTGCTCTCTACAAGGAGAAA, GCCAAAGAGATGTCCAAACTA, GCCGAGAGATTCAATGAAATT, TATCGGCCAACTCATTGATAA, TCCTAATAACTACGGATAATG	8	69852, 73529, 4413, 82429, 22225, 2976, 87568, 7598	0.1335	783	0.0642	962	0	0	2	3
Ddx11	CACCTGGTTCTGGCAGAATAT, CCTCATAAACTAAGAGGCATT, GCCTACTTGAATCAGACACTT, GCGGAAGTTTCATCGAGAGAA, GTGAAGGACATGGAACAACTT	5	68790, 66949, 2254, 17799, 7108	0.1335	784	0.0538	816	0	0	1	2
Apc	CCGATGACAAACACCTCAAAT, CGGAGTGAAACTACGCTCAAA, CGTGGATACTTTGTTACACTT, GCCGAGTTAAGAAAGGGCAAA, GCTTTGACAAACTTGACCTTT	5	5019, 47079, 82019, 85253, 6190	0.1336	785	0.0538	815	0	0	0	2
Cyfip1	CCAGAATATCTTACCTCGAAT, CCAGATTCTCAACGATGAAAT, CCAGTAACTGATGGCATGTTT, CCCACCATATTGGACATAGAA, CGCTGCTCTATCAGCCAAATT	5	24467, 7699, 507, 33982, 64816	0.1337	786	0.0539	817	0	1	1	2
Ifrd1	CAGCTTTCAAAGCTCGAACAA, CAGTACCACTTGCAGACAAAT, CCAGAAGTTCTTGATGAGGAA, GCAGTACCACTTGCAGACAAA, GTCTGAATTTGATGGCTGTTT	5	26004, 7716, 48417, 31487, 491	0.1339	787	0.0541	820	1	1	1	2
Trem2	CCAAGACTTCTGTTTCTGCTA, CCTTGCTGGAACCGTCACCAT, GACCCTCTAGATGACCAAGAT, GTCATGTACTTATGACGCCTT, TGCGTTCTCCTGAGCAAGTTT	5	31827, 5707, 5981, 75028, 47747	0.1339	788	0.0541	819	0	0	0	2
Fndc4	CCATCAATCAACACCATTGAT, CCTTGTGCATACTAAGCAAAT, GATCGGATGAAGAACCAGAAC, GATGTTTGATCGGATGAAGAA, GCGTCAGTGTAACAATGTATT	5	1970, 7227, 40578, 31464, 82070	0.1339	789	0.0541	821	0	0	1	2
Slc6a14	CCAAAGAAGTTCCACAAATAT, CCAGTGAACAGTATTGGGATA, CTGCATTATTTGGATACCAAT, CTGGAATTTACTGGGTTCATT, GCTGGAATTTACTGGGTTCAT	5	6700, 59037, 60235, 12279, 3562	0.134	790	0.0542	822	0	0	1	2
Olig3	CCATCAGGAGAGTCGTCTGAA, CCTGCCGACCATTGGCACCAT, CGCTCTCTCCACCGCCAACAT, GCACAGAGATTCACACTCAAT, GCTGAAGATCAACGGACGCGA	5	38461, 52602, 6164, 83325, 5197	0.1342	791	0.0544	825	0	0	0	2
Acpp	CACTACGAACTTGGAAGTTAT, CAGGACTTTGATGAGTGCTAT, CCTGGGATTCTAAATTGGATA, CCTTTATTCTGCGAGAGTGTT, GACGCCATGATTAAGTTGAAA	5	82516, 21494, 64921, 6058, 5526	0.1342	792	0.0544	826	0	0	0	2
Wdr20a	GAAAGAGACCAGCAAGCTGTT, GAGACCAGCAAGCTGTTTAAT, GCTCTACTTCTATATCTACAA, GTAAACCTCAACGACCAGTCT	4	4168, 7875, 85716, 55674	0.1343	793	0.0432	658	0	0	1	2
Opalin	AGACTGAGATACCATGTGAAA, AGAGGACTTTGGTGGCTTGTA, CCTCTCACTCAACATCAATTT, GAACTCTATGACAATCCCAAA, GAGACTGAGATACCATGTGAA	5	1599, 77664, 41236, 7374, 13727	0.1343	794	0.0545	827	0	0	1	2
4930455C21Rik	CAGAGCCAAGCGGAGATTTAT, CGCTACATTGAACAGAGCCAA, CGGTCACTTGTCTCTGATCTT	3	9720, 3406, 13831	0.1343	795	0.0335	484	0	0	1	2
Olfr910	CCTCTTTAACTTGTCCTTCAT, GCCCAGTATTGTCATCATCAT, GTCATGTGCATTTATGTACTT, GTGCTGAACTCTCACCTTCAT	4	10662, 4111, 54074, 7909	0.1345	796	0.0433	664	0	0	1	2
Mtus1	CCCAATTAACAAGACACACAA, CGCAAGTTACAACTCATTCTA, CGGAGCCATTTGCACAGATAA, GCCTGTATTAACCAAGTCATA, GCTGTGTTAGAGATCAAGAAT	5	8713, 6049, 68527, 5604, 20270	0.1345	797	0.0547	831	0	0	0	3
Twist2	AGCAAGAAATCGAGCGAAGAT, CCAGTCGCTCAACGAGGCCTT, GAGCGACGAGATGGACAATAA, GCATTCTTGTAGAACCTGTTT	4	46894, 54959, 8919, 1087	0.1345	798	0.0433	663	0	0	1	2
Foxj3	CCAATGGATTTGTGATAACTT, CCACAGTACAACCTTCCAGAA, CCACCGAGTAAGTCAAAGAAT, CCGCAACAGGTATCCTGTAAT, GCTGAAGGAAAGCTGTCGAAT	5	14196, 6686, 82057, 3703, 30767	0.1346	799	0.0547	830	0	0	1	2
Commd10	CGCTGATAAATGCAATAGACA, CTGGAGACAATATCATTTGTT, CTTAGGAAAGACAAAGCGGAA, GCATTCTCTCTAGAGAAACAA, GCTGTTCGATTTCTACAACAA	5	46317, 59891, 84678, 7661, 783	0.1346	800	0.0547	832	0	1	1	2
Fcer2a	CCAACAGAAGTGCTACTATTT, CTCAATATGGAGGGAGAGTTT, CTGTGGATAGAGATACTGATT, GCAATTCAGAATGTCTCTCAT	4	680, 36964, 9063, 64190	0.1346	801	0.0434	665	0	1	1	2
Igfbp1	ACAGCAAACAGTGTGAGACAT, CGAGAACTCTATAAAGTGCTA, CGCCGACCTCAAGAAATGGAA, GCTTGATACATGAAGCTGGTT, TCTGCCAAACTGCAACAAGAA	5	2109, 11885, 66537, 7222, 92006	0.1346	802	0.0547	833	0	0	1	2
Chfr	CAGCACCAATGGAACAGTGAT, CCAATGGAACAGTGATCAATA, CGCAGTTCACTTGTTGCAAAT, GAATCGGACATCCTGAAGAAT, GCCATGTCATCTGGAATAATA	5	7443, 42877, 87502, 1448, 81057	0.1347	803	0.0547	834	0	0	1	2
1700001P01Rik	CACACATCGGTGTTTGGAGAA, GCCATCACTACGGGCTTAAAT, GCCTTATAATCCTCAACTGGA, GCGATATCTCAATAGGAGGAA	4	26066, 5370, 7505, 68347	0.1347	804	0.0434	666	0	0	0	2
Clcn3	AGAGGGCCCTGGATCTTATAT, CCAAAGTATAGCACCAATGAA, CCGACTAAATGGGTACCCTTT, CCTACGATGATTTCCATACTA, CGACGCAAGTCCACCAAATTT, CGTTGGAGTATATTCAGCTAT, GCACAGCATACTCCATCTCTT, GGACGCCTCCTTGGCATTATA, TACGATGATTTCCATACTATT, TTGAATTGAGCCATCTATTAA, TTGTGCCTAGCGCTCATATTT	11	47108, 78209, 16066, 17471, 21263, 48838, 3623, 13415, 6863, 1783, 29975	0.135	805	0.0762	1138	0	0	2	3
Fam111a	AGGAATTGAAGGGTACTTAAA, CTCATTTGGTTCTACGCTTAT, CTGGGCTGTATCATAGAATAA, GCTAGAAGAGTACATTGTGAA, GCTGGGCTGTATCATAGAATA, GCTTCTGGAAACTTGAACCAA, GGACCAAGCATCTACCAATTA, TGCCACATAGTGGGTTGATTT	8	37498, 70701, 58371, 4454, 15836, 91171, 15464, 3040	0.135	806	0.065	975	0	0	2	2
Zfp92	CCATGAAGTTTACAGACAGAT, CCTCACGATTTCAGGCCAAAT, CGAAGATGACAAGAAACAGAA, GACCCTCTACAAGCAAGTGAT, TCCTCACGATTTCAGGCCAAA	5	5359, 90805, 6163, 74796, 90871	0.1351	807	0.0553	835	0	0	0	2
Pla2g15	CACGCCAAACTCTTTCTACTA, GAGGAGATGTACCAGATGTAT, GCACAGAGTATCATTGCAGGA, GCAGAGTTTGTGACCATCATT, GTTATCATTGACTGCTGGATT	5	3496, 33504, 28199, 6787, 46907	0.1351	808	0.0556	839	0	0	1	2
Wwtr1	CAGCCGAATCTCGCAATGAAT, CCATGAGCACAGATATGAGAT, CCTGCATTTCTGTGGCAGATA, CCTTCTTTAAGGAGCCCGATT, GTGATGAATCAGCCTCTGAAT	5	49686, 60648, 73688, 7526, 1288	0.1352	809	0.0556	840	0	0	1	2
Slc35f2	CCAGCCAGTATTTGGCAGAAA, CCGGGCAAGATACAAAGTGAT, GCCCTGTTATTTGTGGCATTT, GCCGATGTGGAAGCCAATTAT, GCTGTGTCTAACGTGTGTGAA	5	36315, 69265, 48814, 240, 7878	0.1352	810	0.0556	841	1	1	1	2
Evx1	CAGCCTTAAACCTTCCTGAAA, CCTTCCTGAAACTACCATCAA, GAATCGGATTTCTATGAAGAA, GCAGCCTTAAACCTTCCTGAA, GCCACTGACTTCTTTCCCTAT	5	78179, 6599, 4087, 62179, 11329	0.1353	811	0.0557	842	0	0	1	2
Vps37c	CCCTTGGAGCTTGGTATGTTT, GAAACGTTCTTAGAGTCCTTT, GAAATGCAGAATGACCCAGAA, GTTACTCTTGGTCTCCACAGA, GTTCAGGACCTGCAGTTAGAA	5	65414, 6086, 14538, 5650, 30393	0.1354	812	0.0558	843	0	0	0	2
Smad7	ACAGCTCAATTCGGACAACAA, AGCAACCATGGACGGGTTTCA, AGTCGACTCTGTGAACTAGAG, CCTCCCTGGATATCTTCTATG, CTAACCTTTCCCGAGTGATTG, CTCCAGATACCCAATGGATTT, GCAAACTCTTTGGTTGGTGTT, GCACAAAGTGTTCCCTGGTTT, GCTGTGAATCTTACGGGAAGA	9	79426, 52527, 3821, 53050, 28864, 3454, 57004, 83891, 70006	0.1356	813	0.0742	1112	0	0	2	2
Olfr1036	CGCCTCATTTCTGTGCCTTAT, GATGTGTTGTTCTCCTCAAAT, GCTCATTGTAGTAGCTGTGTT	3	10699, 26563, 793	0.1357	814	0.0345	501	0	1	1	1
Nags	CCGCAGTCATTACAGCCGCTA, CCTCGGTTGCACTCGATCTAT, CGAACTAGTCAATCATGCCAA, GCGGAATAACAGTCAGAAGAT, GCTCTACCTAAGGTAACCTTA	5	29054, 25010, 44705, 1657, 7435	0.1357	815	0.0559	846	0	0	1	2
2700049A03Rik	ACCATCCCACTACTGATATTT, AGACTCATGAAGGCTTACAAG, AGCAACAGCAGATAGACATTC, AGTACCCGTGCCGAAGTATAA, CGTTGCAAGACGAGGATTATA	5	63786, 6730, 56308, 25703, 3777	0.1357	816	0.0559	845	0	0	1	2
Gc	ACCACTTCAATTGCCAGCTAT, CCAGAAGTGTTCCTCAGCAAA, GCCGAGACTATGAGAAGGATA, GCTCACAGATTGATGCAGAAA, TGCACTAGCTTGGATCTTGAA	5	80799, 7297, 2078, 47376, 53149	0.1357	817	0.0559	844	0	0	1	2
Magohb	CAGGAACTTGAAATCGTAATT, GATGTAAATCAGTCAAAGGAT, GCAGGAACTTGAAATCGTAAT, GTACAAGACTTGAAATGCTTA, TATGCCAACAACAGTAATTAT	5	76689, 49756, 7929, 235, 88987	0.136	818	0.0563	850	1	1	1	2
Emilin1	ACCACTGGCTGGACGCTATTT, CACCTTAACAACCATCATAAT, CTGCGGTTCAGGCATCCAAAT, CTTACTGCGCCTCAATCTTAC, TCAATGATGGAGGCTACTATG	5	70390, 69995, 71606, 6887, 3364	0.1361	819	0.0563	852	0	0	1	2
Dsg4	CATCCCATCAAAGACATATAA, CCAGAAATTCAAGTGACACAA, CCAGAGGATAACCTATCGAAT, CCTAACATTTACCTCAGCATT, GCCAGAGGATAACCTATCGAA	5	6018, 5980, 53224, 46874, 14810	0.1361	820	0.0563	853	0	0	0	2
Scp2	CCACTCCAACTGATAAACATA, CCCAGTACGTTTGAAGAGAAA, CCTCCCGAATAGCATGAGATA, GCCATGAAACTACAGAACCTT, GCTTCCCAATTCAGATAAGAA	5	42151, 28934, 27478, 6644, 4108	0.1362	821	0.0563	851	0	0	1	2
Zik1	CCTTTCAAGATGTGGCCATTT, CGGACTTGTAAGTGTTGAATA, CGTGGCAAATACTCCCTTGAT, GCAGAACTTTGCACTCATAAA, TGCAGAACTTTGCACTCATAA	5	47508, 70602, 70214, 1826, 7408	0.1362	822	0.0563	854	0	0	1	2
Egfl7	GATACTTGCCAGACAGATGTT, GCATGGTTTCTAGTGTTGGCA, GCCAGACAGATGTTGATGAAT, GCTGTGTCAATACTGTGGGAA	4	6237, 29900, 7319, 38082	0.1362	823	0.0441	677	0	0	0	2
Tab1	CCTCAGTACCAGAAGATCCTT, GCCCTTCCATCAGGATTAAAT, GCGATGATTGACACCGAGTTT, GCTATCCATTGGGTGAAATGA, GTTACAGGTTACACAGCTAAA	5	5817, 6085, 18091, 40346, 44115	0.1363	824	0.0565	855	0	0	0	2
Sprr1a	CAACTGTCACTCCATCACCAT, GCAGAAGACAAAGCAGAAGTA, GCTGCTGTCTATCCTGCTTAT, TCACCATACCAGCAGAAGACA, TGTCACTCCATCACCATACCA	5	40473, 47441, 7735, 41543, 872	0.1364	825	0.0565	857	0	1	1	2
Onecut3	CCGCACGCTGATTGCCATCTT, CCGTTCTTTCTCCTTGTCTTT, CGAAGAGATCAACACCAAAGA, GCCGAAGAGATCAACACCAAA, TGCAAGCGTAAAGAGCAGGAT	5	6885, 74284, 3426, 47370, 88974	0.1364	826	0.0565	856	0	0	1	2
Pcdha10	CGAAGGTTCAAATGGTCAAAT, CGAGCTTCAGAGCTTCACTTA, GAAGGTTCAAATGGTCAAATT	3	2012, 52818, 10363	0.1366	827	0.0347	502	0	0	1	1
Pcdh20	CCAGTGGATATTTCTAACATT, CCATTGGCATAAGTGACATTA, CCCTCAATCTAATATGTCTTA, GCCTTGCTTCAGACAGATTAT, GCTCTAATACACCAAGCAGAT	5	76078, 62826, 55300, 4977, 6402	0.137	828	0.0569	860	0	0	1	2
Sdr16c5	CCGGTGAGATAGTGCTCATAA, GCAAGTAAATTCGCAGCCCTT, GCAGAATCTATGTTTATCGAA, GCCTGCCATGATTGCTAACAA, GCTCTACTTGTATATGCCCAA	5	54244, 4390, 32021, 23231, 6633	0.1376	829	0.0572	863	0	0	1	2
Hnmt	CCATGGACATAACAGACTGTT, CCCAGGAATCTGTATTAACAA, CCGGGCATAATAGCAAGGATT, GCCGATGTTCAGTGTGGAATA, GCCTGAATTTAGTGTTAAGAA	5	5703, 71315, 89401, 6199, 22283	0.1376	830	0.0572	862	0	0	0	2
Pnpo	AGTCCCTGGAGTAGTTGATTC, CGAATCAGTTAGTGGCTGGAA, CTGTTCAGTGTCCGGACATAG, CTTTGCCTCTCTTGTCTTCTA, GCTAAGCCATTTCCTTTCTTA, GGACCAATGCGCAAGAGTTAC, GGCCGAGAACTACTTCCATTC, GGCTTCCGCTTCTTCACTAAC, GTATGAGAGACTTGCACCTTA, GTGTGTGGCGCTGGGTTTAAA, TGCTGAAGGGCTTTGGCAAAG, TGGATCCCATGAAGCAGTTTG	12	82872, 18203, 20905, 17973, 87198, 2876, 84652, 20635, 59342, 31357, 58027, 3041	0.1378	831	0.0807	1216	0	0	2	2
Colec10	CCGGGAAACTGAAGAGAAATT, GAGGAGAAGAACTACAGGGAA, GCAATATGTGTTCACAGATAA, GTCTGGATGTTGATAGTCGAT, GTGTCACCTTACCATGTATTT	5	35318, 19464, 6645, 4431, 17853	0.138	832	0.058	867	0	0	1	2
Pdlim3	CCCAGCCATCTGATATGTAAA, CGACTGTAACCTCAACCTCAA, GCAGCAAACATTGATGACAAA, GCTTCCTATAACTCACCAATT, TGGGCTCTATTCAACTAGCAA	5	77077, 7827, 86861, 933, 49886	0.1383	833	0.0583	871	0	1	1	2
Ky	CCAAGGTGTCAGAAACGGAAT, CCACAACTTCTACAGCTACAT, CCTATCATTCACACCAGCGAT, GCGCTACATCTTCCAGTTGAA	4	8670, 64543, 2621, 23586	0.1383	834	0.0455	697	0	0	1	2
Ccdc46	GAACTAGAAACCCGCTCTCAT, GAAGAACTGACCACCTACCAA, GCAGGAGCAGATAATGTACAT, GCGTCTCTAAGACAAGAACTT	4	7103, 7178, 75513, 10882	0.1383	835	0.0456	699	0	0	0	2
Sptlc3	CCCTGAAGATATTGACGTATA, CCTCTTTATCTCGAAAGTAAT, CGCAATGAATATCCCTGTATT, GCAATGAATATCCCTGTATTT, GCAGTCACATAGCACTACTTA	5	7217, 50744, 2778, 24821, 77815	0.1384	836	0.0583	870	0	0	1	2
Gh	CAGATCCTCAAGCAAACCTAT, CAGCGCTATTCCATTCAGAAT, CCGTGTCTATGAGAAACTGAA, CGACATGGAATTGCTTCGCTT, TGCTGACACCTACAAAGAGTT	5	9583, 25257, 3528, 6982, 39791	0.1386	837	0.0584	872	0	0	1	3
Ppl	CCAAGTTATCTGAGCTAGAAT, CCAAGTTCACAGAGGTTAATG, CCACCTCTGATGACTTAATAA, CGGCAGATTGATAAACTGCAT, GCGGTGAAGGACTATGAACTT, GCTGCTCAATATGACCGCTAT, TGGACAAGACCAGGTTAATAG	7	49385, 5192, 40859, 78786, 70382, 24031, 3199	0.1386	838	0.0643	964	0	0	1	2
Pde4dip	CTAGCACCTTTCTTACATGAT, CTTACATGATCTCAAGTTGAA, GACATTGTTGGCACCCAACAA, GATCTCAAGTTGAACCGACTT, GCCACATCATGCCTATTGAAT	5	54063, 29066, 7703, 1392, 88854	0.1388	839	0.0586	876	0	0	1	2
Ulbp1	CACCTCTCTTGGATGACTCTT, CCTGTGTTTATGCAGATTGAT, CCTTTCTCATTCTTACATGAT, CTTCACCACAATCCAGTGTAT, GCTCATAGGAACAGCATGAAT	5	10410, 3547, 90836, 27235, 6986	0.1388	840	0.0586	878	0	0	1	2
1110034G24Rik	CAAGGCTGCTACTGACTCAAT, CCAGATAGCAATTCTCTAAAT, GACTGTAATGAAAGACTCGTA, GACTTCGGAAATCCCTGGATA, GCTCTATCTTACAGCGACATT	5	52566, 23935, 2007, 89063, 7501	0.1388	841	0.0586	877	0	0	1	2
Ryr2	CCCAATAACTACTGGGATAAA, CCGCTAATGAAGCCATATAAA, CGTGATATAATCCGCAGTAAT, GCAGGAATAAAGGTTCGCTTT, GCTGCCAAAGACCTACACTAT	5	48078, 6533, 47193, 38037, 4926	0.1389	842	0.0586	875	0	0	1	2
Aldh8a1	CCACCAGGTGTGATCAACATT, CCCTTGGAATTTACCACTCTA, CGAGAGCTAACAGTGTTAGAT, CGTGTGTTGTTCCGTTTGATA, GCTACCAGAAAGTGGAAAGTT	5	7500, 64966, 62902, 70909, 2060	0.1391	843	0.0587	880	0	0	1	2
Tuba8	CAGAGATAACTAGCTCCTGTT, GACCAAGAGAACTATTCAGTT, GCCGGAGTTCAGATTGGCAAT, GCTTTCATGGTGGATAACGAA, TCAACGATGACGACTCCTTTA, TGACCATAAGTTTGACCTCAT	6	19725, 1784, 89196, 25921, 6581, 89259	0.1392	844	0.0633	946	0	0	1	2
Saa1	AGAGGACATGAGGACACCATT, AGTGATGGAAGAGAGGCCTTT, CGTCCTCCTATTAGCTCAGTA	3	25166, 8625, 7891	0.1393	845	0.0357	531	0	0	0	2
Xcr1	CCACAAAGTGATCTCCTTAAA, CCAGTGCTTTATGTCTTTGTT, CCTATTCTGTTATGTACAGAT, CTTCTGCAAGTTCTTCAACAT, GCTATGATTATCTGTCGCCAT	5	12805, 5407, 39559, 38591, 6397	0.1393	846	0.0591	884	0	0	0	2
Snx21	AGTCTCGGAACACCCTAGTTC, ATCCTTTCCTGGCACCCTTTC, CAGAAACCTGCAGCGGCAATT, CCATGTCTGCCATCTCCTTTC, CCTCACCTGCACTGGTCTTTA, CTATTGAGTAGTTCCAGAAAG, GAACTTTATTATGCCAGACAG, GCCAATGTTGTCAAAGACCCT, TCAAAGAGGTGCTGGACTAAT, TCTCGCCGATACTCGGACTTT	10	72936, 90750, 58576, 44609, 4166, 11263, 77730, 1892, 87298, 62043	0.1394	847	0.0785	1184	0	0	2	2
Pqlc1	CAGAGCATAGTCATGATCCTT, CATAGTCATGATCCTTACGAT, CTTCAAGACGGCCTACTTCTT, GCCCTTGTATGCCATAGCTAT, GCTCATCTTGAGATCATGTTA	5	69456, 32992, 6971, 46955, 3709	0.1394	848	0.0592	887	0	0	1	2
Gm1862	CCATGACAAATTCAAGCAGTA, CCCTCAACTAAGAAGAGAAAT, CCTCACGTTTCTCAGATAGTA, GCAGACATTAACCATGACAAA	4	8150, 4417, 25122, 35200	0.1395	849	0.0462	704	0	0	1	2
Pola1	CCAAACTTAGAGATGGGCATT, CCAGTTTGTATCGTTGCAGTA, CCTGGATTTCAACAGTTTATA, CGTCAGGATGATGACTGGATT, GCCAATCAGTTGGTGTAAATT	5	7461, 16795, 48344, 2280, 84516	0.1397	850	0.0593	888	0	0	1	2
Clrn3	CAACAGCATCAGCAACCCTTA, CCACACTTACGGATACTCGTT, CCCTCCATTGTAGAACACTAA, GCTTTATCCAGATACCACAAA, GTTGTTGTCATCTGCTCCATT	5	56060, 8527, 4077, 51086, 6862	0.1397	851	0.0593	889	0	0	1	3
Asgr1	ACAAAGTTGGATAAGGCTAAT, AGCACCTGGACAATGATAATG, CCCTCATTTATATCCTTAATT, CTGGCTCTAAGGCAGAATTTC, CTGTGAGACAAAGTTGGATAA, GAACTGGTAGAGCCTACCTAA, GACAATGATAATGACCATCAT, GAGACCAGAGCAGCCAGATAA, GTGGGAAGAAAGATGAAGTTA	9	75526, 61508, 4872, 72331, 46799, 45939, 752, 30787, 22257	0.1397	852	0.0775	1161	0	1	2	2
Rhd	CCTCCAATGGAACAAGATCAA, GCACTTACCTACTACTGCCTT, GCATCCAGATAGCTACCATGA, GCCCTTTCTTTGTGTCCCTTT, GCCGACGAGAAGGTCTTCAAA	5	6038, 82963, 6214, 55796, 14847	0.1398	853	0.0594	895	0	0	0	2
Lgals8	CCATTTGAAGCAAGGTTGAAT, CCCATTTAGTTCTGGGATGTA, CCCTAAAGATTCAGAAAGATT, CGGGAATTCAAGGTTGCTATA, CTAAGCAGTATTGATACACTA	5	6815, 46105, 82655, 76086, 4243	0.1398	854	0.0594	893	0	0	1	2
Tagln2	CCAACTGGTTTCCTAAGAAAT, CCCTCCATGAATGGTTAATAT, CCCTCGGAACTTCTCGGACAA, GAACGTGATTGGGTTGCAGAT, TGGCATTAACACCACGGACAT	5	70359, 9521, 50836, 7349, 2646	0.1398	855	0.0594	896	0	0	1	3
Musk	ACATGCATAGCTACCAATAAG, ATAACAACATTCCCGTCAATA, CCCAACATTGTGAAACTCTTA, CCGAGGAATAACATTGAGTAT, CCTGCACAAGACTGCCATATT, GCCCGAGTCTATCTTCTACAA, GCTACCAATAAGCACGGAGAA, TGCACAAGACTGCCATATTTA	8	38048, 34413, 9562, 5171, 68807, 84043, 1489, 81906	0.14	856	0.0701	1051	0	0	1	3
Gm270	CAATAACATCATGGCAACTTA, CATGACTGAAATCGACATTAT, CCCAGAATATGCCATTTGGAA, CGTCTGACAATGCCAAGCTTT, GCGAGAAGAACGACTCTGTTA	5	73349, 7475, 66541, 89193, 2291	0.14	857	0.0594	892	0	0	1	2
Gjb2	AGACTGTCTTCACCGTGTTTA, AGAGATAAAGAACGAGTTTAA, CAACAAACACTCCACCAGCAT, CCAAGCTTGGAGGATACATTC, GAGAGATAAAGAACGAGTTTA, GCCGTCTTCATGTACGTCTTT, GCTATTTGTTCGTTAGGTATT, GTCTGGTGAAATGCAACGCTT, TAGTTTACGTGTGCAACAATG, TGGAATTTGCATTCTGCTAAA	10	67857, 48913, 69274, 17797, 64501, 10270, 74808, 1140, 12475, 4438	0.14	858	0.0791	1192	0	0	2	2
Asah2	CCCGCTGTCATACTAGCATTT, CCCTGAAATATAATGACAGTA, CGCAGGTCTAAGCAATGTTTA, GCATTGATATAGCTCACACAA, GCGTGGAACTATGTATGATTT	5	50340, 85968, 5393, 6443, 59923	0.14	859	0.0594	891	0	0	0	2
Wnt5b	CGAGAGCGTGAGAAGAACTTT, GAGACCGGAGATGTTCATCAT, GCCGTGTATAAGATGGCTGAT, GTGTTGCTTTGTCAGATGCAA	4	84165, 18167, 3873, 8375	0.1401	860	0.0469	712	0	0	1	2
Col25a1	CCTGGGTTGATCCATACCAAA, GATGGAGAACAGGGACTCAAA, GCAGGAATTAAGGGAGAACCT, GCTCAGAAATCCTACGAACAT, GCTGCTCTTGAATCTGCTAAA	5	60255, 15852, 4771, 6655, 56962	0.1401	861	0.0595	897	0	0	1	2
Mrpl19	ATGACAACCTGCTGTACTTAC, CCTGTTAACAAGCTGAAAGTT, GAAGCTGCATTGTGGGAAGAA, GAGTTCTATGTTGGAAGCATA, GCACACATATACACATGCTTT, GCCATGGATTGAGTTTGATAT, TGCGTATGTGTACTGCAATTA	7	60160, 40536, 3828, 5050, 39185, 10694, 11490	0.1401	862	0.0659	988	0	0	1	2
Phactr2	ATGAAGAGAGTCGACAGTTTA, CGTGGAACTGCTCGGAAATAA, GCGTTGATGGACTAGACAAAG, TAGAGCAAAGAAACATCTTAA, TTCTGACACGCCTAGTCTTAA	5	53790, 61070, 7463, 33903, 2400	0.1404	863	0.0596	898	0	0	1	2
1700006A11Rik	ACATGACTGCTTACGCTTTAT, AGCAACCGGATTGGCCAAATA, CATGCCCTACAGGCAACAATT, CGTTCCTGCAACTCGGGATTA, GGAAAGTCTCTCACCATTATC	5	53284, 56188, 63505, 1390, 7800	0.1404	864	0.0596	899	0	0	1	2
Vmn1r41	CTAAGCCCATTAACCTCTATA, CTCACTTCTATCCATGAGTTA, GCCTTTCTCATTAGTCTCTTT, GCTCACTTCTATCCATGAGTT, GCTTTCTTATCTCTAACACAA	5	11979, 8860, 25436, 264, 8184	0.1405	865	0.0598	901	1	1	1	3
Nprl2	CACAAGAAGTACAGCCGCAAT, CAGTTACAACACGTTGATGAA, CCGAGATGTGTTCCAGCTATA, CCTCCAGTACTCCAATGTGTA, CGTGTGCATTGAACACAAGAA, CTGTCACAGCTATGATGAGAT, GAGTATGATGTGCCCGTCTTT, GTCACCAAGCAAGGACACAAA, TGAGAGCAGCTTTGTATCCAA	9	7448, 89322, 4968, 18571, 56570, 41360, 572, 79944, 87395	0.1407	866	0.0785	1180	0	1	2	3
Mrap	CCGTTTACAATGGCCTTGAAT, CCTGGACTACATAGACCTCAT, CTATGAGTATTACCTGGACTA, GAAAGCCAACAAGCATTCCAT, GCTCACCAGCTATGAGTATTA	5	6637, 20539, 4941, 30351, 42080	0.1407	867	0.0599	902	0	0	1	2
Slfn5	CAAAGTGCAATATGAGCTTAA, CAACATATCATCGTGGACGAA, CCCAGAGTTACTACCGTCAAA, GAGATTGAGAACGGAGACTAT, GCCTGGTTTACAGAGTGAGTT, GCCTTCTACATGACTTATTTA	6	42266, 39093, 6956, 897, 38680, 52999	0.1408	868	0.0644	967	0	1	1	2
Stat2	CCCTACACCAAGGAAGTGTTA, CCGGCCAACAGGTGAAATTAA, CGCTTCAGTGAAACTTCTGAA, GCAGCCATCAGAGTCAGATTT, GCCCAAGTCATGGAGTTACTT	5	52071, 75000, 6595, 5079, 18979	0.1408	869	0.0599	904	0	0	0	2
Olr1	ACAGCTATATTCATCAGGCAA, AGAAGCCTAAAGGTCTGCATT, CCGTTCTGGATTGGATTGCAT, GCCAGGTATCTGACCTCTTAA, GCTATGTAGATGTGAAGAATT	5	63630, 66985, 39574, 8079, 644	0.1409	870	0.06	906	0	1	1	2
Skiv2l	CCGCCTCACATATACCATGAT, CCTCACATATACCATGATCCT, CCTCACGACAAGCTCGGAGAA, CGCATCATGGAGTCTGTGAAT, TGCGCAAACATGATGGCTCTA	5	67845, 23859, 6935, 7746, 4078	0.1409	871	0.06	907	0	0	1	3
Eif3h	CCAGGACATAATCAAATACAA, GCGTACAGACTGACTCCTAAA, GCGTTGAGTAGACAGACTGTT, GCTAGAGATTACCAACTGCTT, GCTGGTATCAGTCCACATATT	5	70836, 5776, 21745, 59262, 6376	0.141	872	0.06	905	0	0	0	2
Olfr172	CCTGAAATGAAGGGCCTTCTA, GCCTTCTATTTGCAGTATTCT, GCTTGGTGATTCTGATTTGCA	3	5822, 9457, 76684	0.1411	873	0.0368	546	0	0	0	2
Siglecg	CCCACTTTATGGCTACTGGTT, GAGGATTTGAGAGATTCAGTT, GTGACCGTTGTCTGCTTGTTT	3	12777, 6393, 9267	0.1411	874	0.0368	547	0	0	0	2
Kcnmb2	CCCTGCTGAATGTGTCAATCA, CCTATATTCCTAAGTGTGGAA, GAGACCATGAAGATCAATCAA, GCAATCGTTGCTATGGTGAAA, GCTCCAATGTGCTGTTCCATT	5	82835, 82390, 456, 8151, 51451	0.1411	875	0.0602	909	1	1	1	2
Cenpk	ACTAAGATCCGTGGGATAAAG, AGTACATCCAGATACTATTAC, CATGGAAGATTGTCAGAATAA, CCACTTCTCCGTTGGTAATTT, GCCTGAAGCAAGTACTCCAAA, GCTGTTATAGATACAGAGGAA, GCTTTGAGACATCCAGAAGAT, GTGATCTTGAAATGGTACTAT, TACTTCTGCGTTACGGAATTG, TGGACACTCTTAACGTATTAA	10	65689, 3759, 71863, 3297, 72591, 72697, 72710, 72752, 85151, 38541	0.1412	876	0.0804	1208	0	0	2	2
Hoxa2	CCTACAGCATCTGAATTACTA, CCTGTCGCTGATACATTTCAA, CGTACACCAACACTCAGCTTT, CTTGTCAACAATGGGCCAGAA, GAGGAAGAGAAGTCACTCTTT	5	42960, 50234, 968, 73675, 7989	0.1412	877	0.0603	911	0	1	1	2
Sema3e	CCAGTGATATTTGGACTGTTT, CCATCCATTCTGAGGCTTGTT, CCTTGTCTATTCCCTGAACTT	3	7683, 9592, 8850	0.1412	878	0.0369	548	0	0	0	3
Setmar	CCCACATTCAACTCAGCAATT, CCCTACCTACATAGGAAATAT, CGACCCTACCTACATAGGAAA, CGCCATGAGAATAACTACGAT	4	7557, 6582, 20256, 47154	0.1413	879	0.0481	725	0	0	0	2
Nutf2-ps1	CCCAACTAGGCGCAATTTATA, GAAGCTATCTAGCCTTCCGTT, GATCCAGCTTTATTCAACATT, GCGCAATTTATATTGATGCAT, GCTCCAAATATCATACACAAA	5	62038, 287, 28319, 59514, 8226	0.1414	880	0.0604	912	1	1	1	2
Terf2ip	ACAGGCAATGCCTTGTGGAAA, CTTCATCTCCACGCAGTACAT, GAGGCAGACAACAAGCTGTTT, GCCCTGACTTTGAAATACATA, TCCACTCTGTTCGTGAGAGAA	5	5444, 61036, 55504, 6524, 89118	0.1417	881	0.0605	913	0	0	0	2
Pnpla6	CCCGCCTTATTCATCTGCTAA, CCTATGAACGTGGACGGATAT, CCTGTATTGGACCTCACATAT, CCTGTTCCTAGACTGGGTTAT, GCCTGTATTGGACCTCACATA	5	59658, 19052, 7565, 40879, 2323	0.1417	882	0.0606	916	0	0	1	2
Gjd4	CAGAGTGACAACAGCAATGTT, CCTATCTATGAGGATGAACAA, GATGAACAAGAGAGGTTTATT, GCTGATTCATAGGATAATCAA	4	89821, 7763, 6040, 23215	0.1417	883	0.0483	732	0	0	0	2
Zfp458	CCATCATTACTTTCTGCACAT, CCCTACAAGTCTGAAGATTAT, CCTTCAGATGTGAAGAGACAA, CTGGTCACATTTCTGGAACAA	4	2145, 55279, 9066, 67875	0.1418	884	0.0483	733	0	0	1	2
Tmem71	ACAATGCAAACAAGCTTATTA, CAAGGAGAACTTAGTTAGAAT, CAGTAGCAAATGACTCCAGGT, GAGAAGTTGACTCACTCCCAA, GTGCTAGATTTGACAGCACTT, TCATTGGTTCAGGACAATAAT	6	56186, 4473, 5818, 39645, 63590, 29241	0.1418	885	0.0652	977	0	0	1	2
9030224M15Rik	CCTTGAGTTGGGTGAATACAA, CTTGGGTGATTGTCTCCTGAA, GAATGAATTTGGGCACCACAA, GACTTAACGAAACCTCAGCTT	4	12340, 67569, 4943, 8140	0.1419	886	0.0484	738	0	0	1	2
Ibsp	CAACGAATACAACAATGAGTA, CGAATACAACAATGAGTATGA, GAGACTTCAAACGAAGAGGAA, GCCACGCTACTTTCTTTATAA, GCGCAAACATACCCTGTATAA	5	67818, 4189, 22127, 59300, 6969	0.1421	887	0.0606	915	0	0	1	2
Olfr74	GATACTCTCATCAGTCAATTA, GCCCTTTCTTCCTCTGATACT, GCTGGTGAACCTTGTTGCAAA, GTTTCTCGTCATTTACAGCAT	4	82120, 6065, 7786, 9635	0.1421	888	0.0486	744	0	0	0	3
Vps39	CCACGTCTTGAAGGACACAAA, CGCTGTTATGTTGCAGACAAT, CGTTGGTTTCAAGAGAGACTA, GCCAGCAAACACTCAGATCAA, GTTTGAGGTAACACTAGAGAA	5	60890, 46081, 40641, 5042, 6694	0.1423	889	0.0609	918	0	0	0	2
Tmem126a	ACAGGAATCTGCTTGAATATG, AGCTCGATTAGCTTCTAGCTT, ATCAGCATATATTGGACTTAA, CCTACCAAAGTCTTGTAAGTT, CGAATCTTGAACGTGACACAA, CTACTGGATTACAGTTTCTAA, GCCTAATAGCAAACAGTCTAT	7	5885, 35546, 27220, 25700, 63055, 1623, 7952	0.1423	890	0.0675	1017	0	0	1	3
Gprin3	CCTAGGAGTAAACGCAACTAT, CCTTGTGTCTATTTGTGTCAA, GAAGGGCAGAAAGTCATCAAT, GCATTGTACCACAGGTGCATA	4	7384, 14993, 66251, 7315	0.1424	891	0.0486	743	0	0	0	2
Gtf2ird1	CCAGTGTACATGGTGGACTAT, CGTCCATGACAAGTCAGAGAA, GAGATGCTGTTCAACACGAAA, GCTGTGGAAATTGTGGGTATT, GTGCCCTACAAGAGAATCAAA	5	10302, 6398, 90466, 78567, 5947	0.1424	892	0.0611	922	0	0	0	2
Ssr2	CCGTTGTCACTGAAGCCATAT, CCTGCAGTATAACATCTACAA, CTCCGGTATGCTCAATGTCAA, CTGCATTAGATGTGGAATTAT, GCGCTGCATTAGATGTGGAAT	5	42911, 45386, 49753, 2685, 7491	0.1425	893	0.0613	926	0	0	1	2
Stk32b	AGAACGAAGAAGTCAACTTTG, CATCATATTCAACCGAGAGAA, CCTGAAGTCTTCCAGGTGTAT, CGAGACACAAAGAAGATGTAT, CGGAAAGAGTTCATCATATTC, GCCCAATAAAGGGAGACTGAA, GCGGAAAGAGTTCATCATATT, TCAGACCTGGATGGCCGAATA	8	4721, 53959, 33100, 34280, 34805, 3151, 47038, 38023	0.1425	894	0.0722	1085	0	0	2	2
Rhpn1	CCTACTATAGCCAGCTCTGTT, CGAAGGGATTACTATTCCCAT, CGCAAGGGCTATGGCTCCTTT, GAAGGGCAGTGTACTGTTTAA, GTGGCAACTGAATATGGGCTT	5	6819, 4731, 80421, 52009, 21548	0.1427	895	0.0618	929	0	0	1	2
Ing3	ATACTAGAGAGGCGATCTTTG, ATGGAGCTGGAAGCCGATAAT, CCTCGGTATTGCATCTGTAAT, CGATTGGACTTACGACCCAAA, CGGCACTCATGACAACCTTAA, GAACAATCACCACGCTCATTC, GATTGGACTTACGACCCAAAT, GCTGGGTTGTCGGAACAATAA, GCTGTTATGTTACACTGTATA	9	32264, 23015, 25655, 4805, 75293, 20300, 37336, 1292, 63244	0.1428	896	0.0806	1214	0	0	2	2
Six6	CCAGTAGACAAGTACCGAGTA, CCTTAACAAGAATGAGTCGGT, CGAACAGAAGACTCACTGCTT, GAGCTTTATCATATCCTGGAA, TGGTACCTTCAGGACCCATAT	5	1744, 26902, 50281, 7824, 85329	0.1428	897	0.0618	930	0	0	1	2
Usp40	CCGACTGGTTAAAGCAGCAAA, CCTCTGCTGTTAAACATTCTT, GCACAGATGAAAGTACAGTTA, GCCAATCAAATTCCTGTTGAT, GCTTCCAATATCTAGCTGGAA	5	7650, 79592, 85009, 2285, 77763	0.1429	898	0.062	931	0	0	1	2
Sell	CCAGTCCAAGTGTGCTTTCAA, GCATCTGTGATGCAGGGTATT, GCCAAGAGACAAACAGAAGTT, GCTAGAAAGTTCTGCAAGCAA, GTGGAGAATGTGTGGAAACTA	5	8310, 41700, 14460, 23145, 309	0.1429	899	0.062	932	1	1	1	2
Arhgap10	AGAAAGAAAGAAGTTCGAGTT, CCGAGTTAATGCCATCCACTT, GCCATCATGGATTTGAAGTTT, GCCGTGTACAACCTTTGTCTT, GCTGTCCTTCTTTCAGGGAAT	5	77095, 29201, 6924, 4479, 38146	0.143	900	0.0622	933	0	0	1	2
Cdnf	CCAACCAATGAACCAACCAAA, GACTACGTGAACCTCATTAGA, GATTTGTGAGAAGCTAAAGAA, GCAGAGCTAAAGCAGATCCTT, GCTAAGCAGAGGCATAGACTT	5	7369, 3171, 13001, 57590, 89944	0.1432	901	0.0623	935	0	0	1	2
Ipo5	CCTGATTGGAAATACAGGCAT, CGTCTCATTCACTCCTCAATA, GCCCATGATTAAGGAACACAT, GCTGCCTTCATACTTGCCAAT, GCTTCATTTAAGTATGCAGAA, TGACTAAAGTGTCGGATATTT	6	65947, 6515, 6193, 15146, 80709, 3566	0.1432	902	0.0661	990	0	0	1	3
Myst4	CCACAGTCAGTTTCCATTAAA, CCATTAAGTAACACAGGGCTT, CCCACAGGAATATGCAAGATT, CCGTGTAATGATCTACGCAAT, CCTGTGATAGAGGATTCCATA	5	2011, 91822, 20033, 27197, 7764	0.1433	903	0.0623	934	0	0	1	2
Fbxo2	CCAAGATGACAGCGTTAAGAA, CCACTGGCAACAGTTCTACTT, CCCAAGATGACAGCGTTAAGA, GCGTTAAGAAATACTTCGCCT, GCTTTACTGTAGGATGGCTTT	5	49927, 38916, 6764, 37004, 5047	0.1435	904	0.0625	937	0	0	0	2
Zfp946	CCAGTTCATACAAGAGGGAAA, GAGATACAACTGTTGAATCAT, GCAGCTAATATACCTCTCAAA, GCCAACTTATAATTCATCAGA, TCACCCAGCTATGCGATCTTA	5	21493, 48811, 6776, 5013, 32439	0.1435	905	0.0625	938	0	0	0	2
Nrip1	CAGTTGCTGCTCGGCCATAAA, CCGATAACAACCCGAGCTTTA, CGGTCTGATTGATAGATTAAA, GATGTGCATCAGGATTCTATT, GCAGGAATGAGCTCGATTATA, GCCATACCACTTTGGGTCTTT, GCCGTAGATACTGCCAATCAT, GCTGCTAATAACAGTCTGCTT, GCTGTCTGATTCCATCGTGAA, TAAGTGGGTCATCGCAGATAT, TTACCTCGAAGGGTTACTAAT	11	16538, 39141, 80725, 25089, 1139, 42057, 48977, 28315, 4105, 8604, 7137	0.1435	906	0.0848	1278	0	0	2	4
Zdhhc7	CACTCGATATGCAATGATGAA, CCATGTACATAGCTCTGTCTT, CTCCTGACTGACAATGACAAT, GCAGACTTCGTGGTGACCTTT, GCCTACTATGAATGTATCCTA	5	70281, 3837, 46655, 7175, 90672	0.1436	907	0.0626	939	0	0	1	2
Zbtb32	CAGATAGAAACGTCTGGGCAA, CCAGCAATCAGAAGACTTCAT, CTTGACAAAGAGTCCAAAGAA, GAGATGTCACACAAGCATAAA, GCATCAGATGGAGACACATTA	5	45125, 8165, 68177, 18644, 876	0.1437	908	0.0627	940	0	1	1	2
Olfr816	CACAGTGGAAAGTTGTGTTAT, CCACAGTGGAAAGTTGTGTTA, GCAGAGAATATCTATTTCCAA	3	11349, 839, 34155	0.1439	909	0.038	566	0	1	1	1
Hoxa4	CAACTACATCGAGCCCAAGTT, CCAACACCAAGATGCGATCTT, CCACAAACTTCCCAACACCAA, CGAGCCCAAGTTCCCTCCTTT, CGCCGTCAACTCCAGTTATAA, CGGAGAATGAAGTGGAAGAAA	6	89006, 6950, 18076, 56348, 60739, 1408	0.1439	910	0.0666	993	0	0	1	2
Cbl	ACCAACTCCTCAAGATCATAT, AGGCGAAACCTGACCAAATTA, CCCACACAATAAACCGCTCTT, CCTCGGAGAATCAACTCAGAA, CCTGACCAAATTATCCCTGAT, CGCACTGTCTTGTCAAGATAT, GACACTTTCCGGATTACTAAA, GCAGACTATCAGCCTCTTCAA, GCTGTGCTGTGGCCCTAATTA, TGATCTGACCTGCAATGATTA	10	2235, 26640, 54096, 50095, 46535, 38524, 4214, 32917, 82529, 43066	0.1441	911	0.0841	1262	0	0	2	2
Wee2	CATATTTGCCTTAGGATTAAC, CCACCATTGTTATTATCAGAT, CCAGAGACTATCTTGAGGAAA, CCAGAGATGAACTTCATACTT, CTCCCGAAGCTCTAGACATAT, CTCTTTGTCTCTGGTCAATAT, GCAGAGTCTTTACCCATCAAT, GCGTCCAATAATCACTTCCAA, TACTTTGGCCTATGGATTAAG	9	11456, 61523, 3587, 85688, 7747, 4090, 82937, 40868, 18693	0.1442	912	0.0824	1234	0	0	2	3
Slc35b3	CCATCGGTGTACAACATGATA, CCTAGCAATGTTCTGAACATT, CCTGTTATGCTAGGAGGAGTT, CCTGTTCTTTGCTAAGCCGTT, GCACAATTGCACCAAACTTTA	5	86701, 7130, 85305, 4070, 88333	0.1442	913	0.0631	944	0	0	1	2
Tmem208	CAGAGGGAAGAAACAGATATT, CCTACTGACAGCCATTGTTCA, CCTTGGTCTTCTTCTATTCCT, GAACAAAGAAACTCTCAAGTT, GCACCAGAGCTCAATGAGAAA	5	26128, 1400, 86099, 38428, 8022	0.1442	914	0.0631	943	0	0	1	2
Ctsk	AGCAAGCACTGGATAATTAAA, CACGGCAAAGGCAGCTAAATG, CCAGGATGAAAGTTGTATGTA, CCCTCTCGATCCTACAGTAAT, CCTCTCTTGGTGTCCATACAT, CGACTATCGAAAGAAAGGATA, CGGCGTTTAATTTGGGAGAAA, CGGCTATATGACCACTGCCTT, GACCGTGATAATGTGAACCAT, GACGCAGCGATGCTAACTAAG, GAGGGCCAACTCAAGAAGAAA, GAGGTGTGTACTATGATGAAA, GCCACGGCAAAGGCAGCTAAA, TGAAATCTCTCGGCGTTTAAT, TGCTCTCTTGGCTCGGAATAA	15	82201, 57191, 56464, 2660, 2516, 89494, 66091, 50264, 42805, 57827, 17215, 3085, 36848, 24397, 22154	0.1444	915	0.0919	1371	0	0	3	3
Cyp3a44	CAGACACTTTAGTTTCATCAT, CATCTCATTGTCTCTGCTAAT, CCAGATGAATAATGGACTTAA, CCTCTGAAATTAAGCAGACAA, CTCAAGGAGTTCTTCTGAGTT, GTCTGTAAGAAAGATGTTGAA	6	1524, 7866, 82750, 67416, 63328, 6937	0.1444	916	0.0676	1019	0	0	1	3
Mfsd3	CTGGTTAACACTCAGCACACT, GCAGGCTACACATTACAGCTT, GCTAAGCCTATGTCTACAACA, GCTCCTATCTTCTACAAGATT	4	32685, 76362, 449, 9821	0.1445	917	0.0504	759	1	1	1	2
Olfr539	CACTGGTCTAATGACACGCTT, CCATCTCCTTCAAGGGATGTA, GTGAATAGCATTCTGACTCTT	3	10545, 3403, 69836	0.1445	918	0.0381	567	0	0	1	1
Zfp870	AGCGTTAAGAAGCCCTATGTA, CCAATTCATAGTAGAGCAGAA, CCCAATTAAATGCCTTCTCTT, CCTTATGAAGACCAAGAACAT, GCGTTAAGAAGCCCTATGTAT	5	30012, 35686, 1388, 8046, 54467	0.1446	919	0.0636	948	0	0	1	2
Lpp	AGGACGCTATTATGAACCTTA, CCCACTTTAGTCTGCAACTAT, CCTATATCACAGACCCTGTTT, CGAACACTTGACCAAGAAGAT, CGCTATTATGAACCTTACTAT	5	36750, 785, 92336, 8260, 66842	0.1448	920	0.0636	949	0	1	1	2
Amhr2	CCTGGGAATGTTTCTCGTGTT, CTGCGTTTCTCCCAGGTAATC, GACCATATCGTTCGCTTTATC, GCATGACCATATCGTTCGCTT, GCCTTGGTACTCCCTGGTCTT, GCTGCGTTTCTCCCAGGTAAT, GTTTACTCTCTGGCGCTACTA, TCTCCAGAGAGCGGATGTTTA, TGACTTCTGCAATGCCAATTA	9	66564, 68516, 48704, 32271, 5081, 38655, 70276, 57166, 695	0.1449	921	0.0834	1252	0	1	1	2
Tmc6	CACAGTTATGTACTACGGCTA, CCATGAACTCTAGTTGGCATA, CGGACTCTGAACACCATGTAT, CTGCTAGTAAAGGAGCTTCAA, GCTGGCTGTCATCTACTTCAA	5	66555, 38928, 6781, 5244, 65194	0.1449	922	0.0637	951	0	0	0	2
Wasf3	ATGCTTCCAGCACAGATAATT, CAACCCTGTTGCTGACATTTA, CACCAGGAAACTCGCAGTATT, CATCCGATGTCACCGATTATT, CCAACCCTGTTGCTGACATTT, CCCTGTAGCTTTAGTCCCTTT, CCCTGTTGCTGACATTTATAA, CCGATTATTCTTATCCTGCTA, CTTCTACATCAGAGCAAATTC, GAGTGGAATATGATGGCGTAT, GCACCCTCACAGTGGTATTTC	11	41986, 3827, 58577, 30512, 2108, 60477, 13939, 28296, 45917, 17401, 59128	0.145	923	0.0863	1298	0	0	2	2
Olfr1390	CAACTGGAACTCCTTCTCTCT, CCAGGGATATGACAGAACCAT, GATACCTAGTCTCCTGAAGTT, GCAGCCATGTACACATACTTA, GTCCGAGTTGTATTCTTGATT	5	11434, 7720, 2458, 76314, 18417	0.1451	924	0.0638	957	0	0	1	2
Rab19	ACGCAGCTATCATCGCTTATG, CACGCAGCTATCATCGCTTAT, CAGATGAGAATGTGGACTATT, GCAGCTATCATCGCTTATGAT, GCATTTCAAATCTGGAGTCTA, GCCCTCAAGGACTCCATTAAA, GCTCATGGCGAAGGAGTTAAT, TCGAGATAGACGGCAAGAAAG	8	27772, 79889, 6811, 30881, 80788, 5264, 45280, 1846	0.1452	925	0.0748	1127	0	0	1	3
Svep1	ACGGTGCCATGATCATCTATA, CCACATACAGTATCAGTGTTT, CGACTCATTAAGACATTGGAA, CGCAAATCCTTCGTCACTCTA, GCAGTTTGTAAAGACCAAGTT, TCGTGTCCGCTGGGTACTTAT, TTACATGTGTGCGTTGTTTAA, TTGCCCATCAGGGACATATAA	8	46005, 25630, 11405, 89024, 1584, 58068, 5352, 82130	0.1452	926	0.0748	1126	0	0	1	2
Vkorc1l1	CATTCTGTACTTTGTGCTGAA, CCTCAGAATCTTAAACTGATT, CCTGCTCTCCATCTACGCCTA, CGTCACCACATATGTGCTGAA, CTCCTCATCATCAATTACAAA	5	3751, 85942, 7301, 53716, 16322	0.1453	927	0.0638	952	0	0	1	2
Dpep1	CGGAACCTCCTCCAGTGCTCT, GAGGAGATTATGATGGTGTTA, GCAACTGCTAAATTTGTTCAA, GCCGTGAAGAGAATACTGGAA, TCAGCAACTTTGTGTCCTGTT	5	7499, 4978, 70095, 6892, 17545	0.1453	928	0.0638	953	0	0	1	3
Pigw	CCAGGAACATTCTACCGAGTA, CCTGGATTATACTCCACTCAA, CTGACTGTATTGTCTTCCTTT, GCATGGCTGTTGTATCAGATA, GCTTCCAGTCTGATGCTTCTT	5	43907, 6260, 25400, 34242, 6466	0.1453	929	0.0638	954	0	0	0	2
Slc27a4	CCTTTGTGTACCCTATCCGTT, CGGCCTGATGACATTGTCTAT, GCAATGTAGTTGCCCTCTTTA, GCAGGTATTATCGTATGGCTT, GCTGCACAAGACAGGGACCTT	5	7402, 43689, 3488, 76948, 75962	0.1455	930	0.0642	961	0	0	1	2
Zfml	CCAGGAAGTTACATTGAAGAT, GAACTAATTGACCAAGATGAT, GCTGAACTAAAGGATTCAGAA, GTCCAGTTGATTTGTGTATTT	4	19492, 1134, 9682, 19565	0.1458	931	0.0515	782	0	0	1	2
Bag5	CCGAACTGATAAGAACTACAT, CCTGTCGGATGACAAGAACTA, GCCCTTGTGAAAGACAAGATT, GCGTACAGAGATCAGAAATTA, TCTCAGCTCATGGAGCCTAAA	5	4037, 64367, 55014, 15839, 7241	0.1459	932	0.0646	968	0	0	1	2
Olfr633	CACTCAGATCTAATCCAACTT, CAGTCTTACACTTGGATTGAA, GATCCTGTACACGGTACTAAA, GATGTTCTCCATACATTCATT	4	7614, 7386, 20554, 13332	0.146	933	0.0519	788	0	0	0	2
Vit	CAGATCCACCTCAAAGCCATT, CGTTTGGTGTTACTATTCTTT, CTGTTTAAACTCTGCGGACAT, GCTGGATAATTCAGGAGGGAA	4	9640, 1312, 22076, 73999	0.1461	934	0.0519	786	0	0	1	2
Trnt1	ACAGGAGGTTGGCAGATATTC, ACGAAGAGATCTCACTATAAA, AGGTGTAGTTGGAGTAGATTG, ATTTGATCCACCTGATCTATG, CACATAGGTTTACCTGCTAAT, CGAATTGATGTTACCACTGAT, GCCCTGTGTTTATCTCCTTTA, GCCTGACAGAATTATTTGCCA, GCGATACCTGTTTACAATGAA, TCAATGGTTATGCAGATTTAA	10	37804, 31018, 84106, 89598, 84340, 63554, 56549, 86479, 4951, 226	0.1461	935	0.0861	1294	1	1	2	2
Hmgb4	CCAAATACCTACCTTGGCTTT, CCACAACTGACGAAGCAGAAA, GATCCATCTCAAAGCACGAAA, GCAAGAGAAGAAAGAGAAGAA, TGTGTCTTCTTACATCCATTT	5	2160, 12759, 7888, 51871, 78722	0.1463	936	0.0648	971	0	0	1	2
Med1	CCAGAGGAGAAACTAATGATA, CCAGGATTTCTCAACCCTTTA, CCCAAGATTACCATTCAGATT, CGCAAGCACAAATTCTTCTAA, GCCAGCAATGACTGATCGTTT	5	2344, 33827, 7828, 71354, 23816	0.1463	937	0.0648	969	0	0	1	2
Inmt	AGAGCAGGAAATCGTAAAGTT, CCCTGGGAAAGTTATAGCAAT, CCTCCATAGTGCAACATGCAT, CTGCCCTGATATAGATACCTA, GAGCAGGAAATCGTAAAGTTT	5	70642, 82083, 4157, 67208, 7225	0.1463	938	0.0648	970	0	0	1	2
Olfr1427	CCAGTCTCAAGAACTGAGCTT, CCTTGTATCCTACACAGTCAT, CTATGGTTTGTTCTTCTCCTT, GCTCCTGATGATCTCAAACAA, GCTTCGAAACCTCTCTGTGTT, GTTGGTAAATGTCACCATCAT	6	3666, 85022, 6319, 28300, 16183, 26701	0.1463	939	0.0695	1048	0	0	1	2
Ugt2a2	CAAATGTGTGATGGTGTACTA, CCAATACAAGACTGTTTGATT, CTTATTCTCTGCAAGACTATA, GCTACTTTCTACACAACCAAT, GCTCTGTGTTCATCCATTATA, GTGGTAGTTTGGCCTACAGAT	6	5983, 65053, 11975, 12724, 89734, 4690	0.1464	940	0.0695	1047	0	0	1	2
Nr2f1	CACATCCGCATCTTTCAGGAA, CCTCAAAGCCATCGTGCTATT, GAGCAGTTTCAACTGGCCTTA, GCAACTCTTCTTCGTACGTTT, GCTACCTGTCTGGCTACATTT	5	30652, 1715, 8049, 61529, 52181	0.1465	941	0.0649	972	0	0	1	2
Sh3gl2	CAAGGCAAGATTCCAGATGAA, CCCATCAACTATGTAGAAATT, GAGAAATTCGATGAGTCTAAA, GATATCATCACACTCACTAAT, GCCCTCAATGAGGACCAAATA, GCCGACGCTTAGACTTTGATT, GCCGAGCTCTGTATGACTTTG, GCTCAGTATGATCAACACCAT, TGGGTGATGATTGCAACTTTG	9	22776, 82533, 474, 9019, 5349, 42752, 46403, 5213, 77464	0.1465	942	0.0852	1284	1	1	1	4
Lmod2	ACCCTGATACGACAGAAGTTA, CCCTGATACGACAGAAGTTAA, CCTTGTGGAAATCCCACTGTT, CGAGCACATTACCAGCGTAAA, GCAGTATAAGACAGCTACGGA	5	3253, 7543, 83130, 39552, 84774	0.1466	943	0.0649	973	0	0	1	2
Fam117a	CAATCACAGCTACGTCTTCAA, CATCGGAAGAGTCTGTGCTTT, CTTGACTTCCTGTCCTGACAA, GATCACCAAGTTGAAGCAGCA, GCATCCATCCACGGTAACAAA	5	74484, 6526, 46130, 6349, 28052	0.1468	944	0.0652	978	0	0	0	2
Plscr2	CCTGGGCTAGAATACTTAAAT, CGTCTAGACCTTTCACTTTAA, CTTCACGGATTCGGATAACTT, CTTGATGAAGTGACTAGAATT, GACGAAGAGAAGTGTATGTTT, GCCAAAGCTCACTCTTCAGAA, GGCCTTCACGGATTCGGATAA, TGCACCTGCTGTTCAGATATT	8	34109, 76776, 16098, 55256, 87740, 4640, 3921, 9155	0.1469	945	0.0767	1145	0	0	2	3
Fgfbp3	CCTTTGCAACTTCTTTGTCAA, GAAGTGGCATTCCCTTTGCAA, GACTGGATTATCAGGACAATT, GCAACTTCTTTGTCAACTTCT, GCATTCCCTTTGCAACTTCTT	5	74258, 35800, 7427, 3671, 25830	0.147	946	0.0653	979	0	0	1	2
Fam19a1	CAACAAGAAACCGACCTTCCT, CGGTCACAAACAGTGAAGTGT, GATGTGTGCTACAGGCAACAA, GTGGATAAGTGCTTGTGCGAT, GTGTTGTAACAAGAACCGCAT	5	63391, 82768, 76122, 6953, 5156	0.1473	947	0.0658	986	0	0	0	2
Arhgef40	CCAAGTACATTGCCTCCAGAA, CTTCGTTTACAAGCAGGCTTT, GCCCTGTTCAATTGCCTTTAT, GCGTCTAGTGTCTGAACTGAT, GCTCTTATTCAGCAAGCTCAA	5	82296, 67893, 8126, 37101, 1687	0.1476	948	0.066	989	0	0	1	2
Fbxo32	ATTTGCAAGCAAGACTATAAA, CCCTCAAGACTTTATCAATTT, CCTATGAAGATGCCACACAAT, CGCCATGGATACTGTACTTTG, CGTTTGATCTTGTCTGACAAA, CTGTGCTGGTGGGCAACATTA, GCGCCATGGATACTGTACTTT, GCTGGATTGGAAGAAGATGTA, GTGCTTACAACTGAACATCAT, TTTAAGCTTGTACGATGTTAC	10	10140, 4811, 19907, 48524, 21231, 72343, 30715, 4114, 2910, 74443	0.1477	949	0.0872	1316	0	0	3	3
Spata1	CCTGTAATAGATCACTTAGGA, GATCTGACTTTGCTCATCGTA, GCACGCAATTGACCAACTTAA, GCTCATCGTAAGACATCACAA, GCTGATCTGACACAGAAGAAA	5	7559, 54666, 8659, 52675, 3420	0.1478	950	0.0662	991	0	0	1	3
Fzd2	CACAGTCTACATGATCAAATA, CACCACCTATTTAGTGGACAT, CACCTAGCCTGCTCGCTATTT, CCGTCCTATCTCAGCTATAAG, CGCTTCTCAGAGGACGGTTAT, CTTCACGGTCACCACCTATTT, GCCGTCCTATCTCAGCTATAA, GCTCTTCGTATACCTGTTCAT, GCTTCTCAGAGGACGGTTATC, TCACAGTCTACATGATCAAAT	10	99, 68820, 39426, 29982, 46983, 87033, 9286, 66641, 73172, 5055	0.1478	951	0.0873	1317	1	1	1	3
Ndor1	CCCTCCTGACAACATGAAGAA, CTCCAAGTTCATCTTTCAGTT, GCTGTGGTAAAGTACCAGACT	3	85840, 9550, 7188	0.1478	952	0.0395	584	0	0	0	2
Tfam	AGGATTCGTTACGACAATGAA, CCTCAGATTAAGTGCTGAGAT, CGGAGACATCTCTGAGCATTA, CGTCTATCAGTCTTGTCTGTA, GCTGAGTGGAAAGCATACAAA	5	8630, 54219, 239, 33539, 37297	0.148	953	0.0664	992	1	1	1	2
Chchd10	CAGTGCAAATACAATCACGGT, CCCTCAAACAGTGCAAATACA, CCTCAAACAGTGCAAATACAA, CTCAAACAGTGCAAATACAAT	4	90579, 9944, 804, 27159	0.148	954	0.0532	804	0	1	1	2
Vmn1r63	CACCAGAGAATGAACCACATA, CATCCTTCTGTTTGTCCATAA, CCAAGGTTGTAAGCTATTGTT, CCACCAGAGAATGAACCACAT, CCCATGACATCATATTCCTAA, GCCATTACAGAGGGACAGTAA, GCGCATCATGTCAGTATGGAA	7	24940, 55052, 3166, 40089, 53112, 5629, 12220	0.1481	955	0.0734	1100	0	0	1	2
5033414D02Rik	CACCTTTGAAAGCCTTGAGAA, CCAGCCTTTCTCGTTCCTATA, CTTTAGCAACTGGAGCACTAA, GACAAATGAAGTCACAGTTAT, GAGGACATATTGGAAACAGAA, GCACAAAGTTGTTGGCTTGAA, TCATCTTCACCTACCAGTATG	7	9714, 57430, 24709, 21616, 5653, 3094, 46113	0.1481	956	0.0734	1101	0	0	1	3
Alad	CAACCTCATCTATCCCATCTT, CTCCTGTTTCTACGGTCCTTT, GTCACGGATGTTCCTGATGAT, TCCTGATGATGTCCAGCCTAT, TGATGAGCTATAGTGCCAAAT	5	62003, 32931, 564, 84977, 8532	0.1482	957	0.0667	994	0	1	1	2
Serpinb12	CCCAGTTCAACCTGGAAGATA, CCTGGAAATGAAGTATGCCAT, CTGCTACAGTTGTTCACGGAA, GAACGAGAAGAAGACTGTAAA, GAGGCATTACATTTCAATGAA	5	6846, 85908, 44272, 22680, 5642	0.1483	958	0.0668	995	0	0	0	2
Lasp1	CCAGGACCAGATCAGCAATAT, CCTTACTGCAATGCACACTAT, GAACTACAAGGGTTATGAGAA, GCCTGGTCAATCCCTTTACTT, GTGCGCTACAAGGAGGAATTT	5	7265, 4391, 60420, 27451, 62181	0.1483	959	0.0668	997	0	0	1	2
Efha2	CCCATATTCTCCTGCGGTATA, GAATTTCTTTCCTACTCTAAT, GATTTGTCCTGGGCCCTTAAA, GGATACCATTCTCCTACTAAT, TTCGTTTATTTGCATCTATAG	5	7363, 81602, 25599, 4102, 91562	0.1483	960	0.0668	996	0	0	1	2
6330503K22Rik	CCAAGCCTTAATAAGTCAAAT, CCGTTCATAGGCTACTTAGTA, GCATTTAGTAATTGCCTTGTT, GCTCAAAGTTTGTGTGTATTA	4	6475, 8090, 20991, 55080	0.1485	961	0.0534	808	0	0	0	2
Sox15	CCAGGGTACACAACTACCCAA, CCGCGACTATCCCGACTACAA, GCCTGCATCCTCGGGCTTCCA, GCGATGAAGAGAAGCGACCCT, TGCCTGGCAGTTACACCTCTT	5	34058, 6898, 56989, 5548, 34751	0.1486	962	0.0669	1003	0	0	0	2
Icosl	CCACCAGAACATCACTAGCAT, CCATGTTTCTAGCGGGTTCTT, GCAGAAAGTTTCACTGGAAAT, GCAGAATAACACTGTCTACTT, GCCCAACCTGTATTGGATCAA	5	13438, 69095, 20752, 2387, 7955	0.1487	963	0.0669	1005	0	0	1	2
Epas1	CCTCCCTTGAATTACTTCTAA, CGACAGAATCTTGGAACTGAT, CGTGAGAACCTGACTCTCAAA, GACAGAATCTTGGAACTGATT, GCCTCATGTCTCCATGTTCAA	5	46571, 17313, 8328, 28208, 1271	0.1487	964	0.0669	1006	0	0	1	2
Ccl1	AGCTGTGGTATTCAGGCTGAA, CTGCTGCTTGAACACCTTGAA, GCATGCTTACGGTCTCCAATA, GCCGTGTGGATACAGGATGTT, GTTTATCCAGTGTTACAGAAA	5	51647, 46108, 2564, 71455, 7903	0.1488	965	0.0669	1002	0	0	1	2
Mrpl54	CGACTACTTCGCAAACAGAAT, CTCTATCCGGGAATATGCTAA, GAGCAAGAACAAGAAGCTGTA, GATTCTCTATCCGGGAATATG	4	9079, 3567, 22062, 31117	0.1488	966	0.0535	809	0	0	1	2
Uros	CCACCGCTTCTCTAGTGAATA, CCAGATTAAGTTTATAGCCAT, CCAGGTCCTCTGAAAGAATAA, CCTTAAATACAGCCTCGAGTA, GCTACTATGAAGATCAGGGTA	5	7884, 2626, 42578, 34352, 25592	0.1488	967	0.0669	998	0	0	1	2
Pnp	ACAAGGTTGTCATGGATTATG, CCTCCCACACTTGAGATATAT, CTTAGTTGCCTTCTCAAATTA, GACCAAAGATCAACCCAATAC, GCACAGACATTGGAAAGGTTT, GCCTTCAAACAGTACCTTCTA, GCTTCAGGATTCTAGCATATA	7	91881, 81378, 83077, 4416, 6371, 5253, 81573	0.149	968	0.0739	1104	0	0	1	3
Eif2c3	CAAGTTGAAATCCCAAAGATT, CCCGATTCAAACCTACTCGTA, CCTGCCACTAGAAGTCTGTAA, CCTGGAATAACCTACATTGTT, CCTTTCCTTTACAGCTAGAAA	5	4050, 7863, 70681, 7419, 84945	0.149	969	0.0669	1004	0	0	1	3
Spred1	CCTTACAGAAGCTCAGACATA, CTAAGGAATGTGGGAGCCTAA, GCACAGATGTAATTGTCTAAT, GCGATGACAAGTTCTGCCTAA, GTCCCTCATCAGGAAGAGAAT	5	7666, 50298, 63675, 20694, 3331	0.1491	970	0.0669	1000	0	0	1	2
Gp6	CCAACCATGGAAAGAAGTAAT, CCTATGAATATCACTGCCTCT, GATCAAGACTTTCTCTTCATT, GCAACACAGGATGAGAGCTTT, GCTGTGTGTACTGCAAGTGAT	5	57922, 42283, 82287, 8303, 1428	0.1492	971	0.0669	999	0	0	1	2
Krt33a	CCACAACCAATGCTTGTGATA, CTTCTCTAAATGTGACTGTAA, GATCTTGTGTGGCAAATCTGA, GATGTGGACCTTGCAACACTT, GCATGAACTGAGAAACTCTCT	5	42350, 32467, 8752, 27156, 81	0.1492	972	0.0669	1001	1	1	1	2
Ccdc81	CAACGAGCACAACGGAATTTC, GATTGAAGATGAGCGACTTAT, TAGTGCAGAGGCCGGTGTTTA, TATCCCTGGAGGGTCCATTTA, TCAACGCTTGAACCTACTATT	5	21644, 6064, 71145, 76246, 6766	0.1493	973	0.067	1009	0	0	0	2
Syce2	CAGGAAAGACTACAAGAATTT, CCATGCACTTATGACCAACTT, CTCTAGCATTGAAACCCTGAA, GCAAAGATCAACCATCTGGAA, GCTTCCATCTCAATGTGAGAA	5	26023, 6090, 70018, 6758, 88749	0.1493	974	0.067	1010	0	0	0	2
Zfp661	CAAAGTTCTCTATGCCCTAAA, CGTTACGCCAAACAAGGGATA, GCACACTGAGAGAAATCCATA, GCCCTAAACGAGAAATCCAAA, GCCTGTTATCACTGCACTTTA	5	28399, 75312, 1859, 56704, 8171	0.1494	975	0.067	1008	0	0	1	2
Cd79b	CCAACCATAATGTCACCGACA, CCACCTATGAAGACATAGTGA, CGGAACTTCTAGTCTTAGGAT, CTCTGTCTACACCCTCACTAT, GAAGTTTCACTGCTACACAAA	5	36822, 17602, 6737, 6162, 35223	0.1494	976	0.067	1007	0	0	0	2
Elovl3	CGTAGTCAGATTCTGGTCCTT, GCACACACAAACACTCAATAA, GTAGTCAGATTCTGGTCCTTT, GTCAACATGATCTTGAGGATT	4	41820, 369, 31527, 10189	0.1495	977	0.0539	818	1	1	1	1
Rnf41	CGAAGACTTTAGCACCTCTTT, GAGGACCTTATCTGCCCTATT, GCCAAACCACAATTGCATTAA, GCCCAAAGATGAACTGCCAAA	4	651, 10109, 60015, 55471	0.1497	978	0.0542	823	0	1	1	1
Cotl1	CAAGCTCACCAAGCATCATTC, CCAAGTTTGCCCTCATCACAT, CTACGACGCTCAGTCAGAGTA, GAAGGAGGTGGTCCAGAATTT, GAGCAGATTACCAGCACTTCA, GATCCAAGTTTGCCCTCATCA, GTTTGCCCTCATCACATGGAT	7	51629, 82153, 27158, 9711, 18422, 5784, 2928	0.1497	979	0.0747	1125	0	0	1	3
Olfr1205	CTACCTGCACATCTCATATAA, CTCTACCTGCACATCTCATAT, GCTGTGACTTACAGCCCTTAT, TGCAATTTGCTCAAGCAGTTT	4	90234, 30056, 9539, 2381	0.1498	980	0.0542	824	0	0	1	2
Pppde1	CATTCTGGAATTGAAGTATAT, CCGCACCTCATAATAGAGATT, CTTCAGTCTAGTGTCAGCCAA, GAATGAATACACCTCATCTAT, GCAGCTTTAGATACGTGATTA, GGCGTCACACTAAACTATAAG	6	58471, 82651, 66082, 140, 7673, 34659	0.1498	981	0.0719	1080	1	1	1	2
Lmtk2	AGTCATAGTGAAGGAGTTAAA, CCAGAATTAGTGACCAGCTTT, CCCATCATTGTCAGTAACGAT, CCCATCCTTGTGAATGATATT, CCTGTCTTACTCCAGCATGTT, CGACCTTCAAACAGAACTCAA, TATTGTACAGCATCGTAAATT, TTCGATGATGTCACCGTTTAT	8	48281, 6482, 5148, 54679, 65960, 23557, 83458, 2764	0.1499	982	0.0791	1193	0	0	1	3
Tbc1d1	CCGAGCAGATATGAAGATTAT, CGCACTGATTGACGAGTGTAT, CGTGTCTTAAAGAAGTCACTA, GAGGCAGAGAAGAGAGAACTT, GCCACGGTAGAGAAACTTCTT	5	8020, 42092, 74099, 46086, 2434	0.15	983	0.0675	1018	0	0	1	2
Abpb	GAATGCCTACCTTTCGATGTT, GAGGAACCATTAACCACCAAA, GCCTACCTTTCGATGTTTCAA, GCTTCAATGAGGAACCATTAA	4	8992, 26068, 4117, 26694	0.1502	984	0.0545	828	0	0	1	2
Rilpl2	CCATTATGAAGAAGCTGTTCT, CCTTGACTGATATTTGATGAA, GAGAGAGACAACCTCAAGCAA, GTCTACTTCCACCCAGAGAAA, GTGACCCTCTTGACTTGAGAA	5	7892, 79237, 2870, 18485, 86749	0.1503	985	0.0676	1021	0	0	1	2
Rnf217	ACAACTGTTGTCTACAATTTA, AGCAGTTGTAATCGGTTTATT, CACATCAAACCTCAGTATATT, CCTTGGCATGAAGGTGTTAAC, GTCACTTTCGTTAACTATATA	5	2940, 7885, 54351, 19965, 85923	0.1506	986	0.068	1024	0	0	1	2
Hexb	CCAAGACTCTTTCGGGACTTT, CCCTTATCAGAGTACCACTTT, CGGCGATATTACAACTATGTT, CTCTCTATACTGGATACTGTA, GCATCAAATCCAAACATCCAA	5	8735, 39425, 44950, 395, 87454	0.1506	987	0.068	1023	1	1	1	2
1500010J02Rik	CCAACATTGTTTACTGTTGTT, CCACTGTGATTTCTAGTTATT, CCGTTCTTGTACCCAAACCAA, CGGCAGATCACAGCATGATAA, GCTGTTCTTACTGTCCCACAA, GGCCCTCATGAAACGTAATTT	6	74656, 86661, 54137, 1407, 34070, 7299	0.1507	988	0.0732	1096	0	0	1	2
Dhrs7b	CATTAGTGATACCATAGTGGA, CCAGGCATTCTTTGACTGTCT, GAAATAAACTACTTTGGCCCT, GACAGACTTTGTGCCATCCAT, GCTACATCCATACCAACCTCT	5	38547, 85328, 8762, 30671, 328	0.1507	989	0.068	1022	1	1	1	2
Ssbp3	AGCTTTATACGTCTACGAATA, CCTTCTTATCAGAGATTCGAT, CGACAATTATTCTCCGAGCAT, CTCCTTCCAGAACGACAATTA, GCAACCAAACAGACACTGTTT	5	6192, 41152, 6810, 11626, 84344	0.1508	990	0.0681	1026	0	0	0	2
Gm5087	CCTTTGTTGATGCTCTTAAAT, CGTATGTTCCAAATCCAACTA, GAGAGTATTCTGATGGTCATA, GCAACCTGATTATGTGTATTT, GCCTAGCAATTCTTGAGCATA	5	88063, 62540, 77832, 4736, 7305	0.1509	991	0.0682	1029	0	0	1	2
Pank1	ATAAGCTGGTGAAGGACATTT, CAGAATCAATATGGTCTCAAT, CCCGTGGTTTGGTATGGATAT, CCGGAAGTATTTAACTTCTAA, GCAACATGATGAGCAAAGAAA, GCTCTTAGCTTTCAAGCTTAT, GTACCCTATGTTGCTGGTTAA, TACTGATCAGTGTGGTAATTT, TCAATGAAGTTGCTAGCATAT, TTTGGAACATGAGGGTTATTT	10	75405, 2043, 65903, 48009, 4514, 13919, 89329, 25028, 28983, 24641	0.151	992	0.0908	1360	0	0	2	2
Asap1	AGATGTGTGAATATCTCATTA, CAGTACCGACTCCTAACAATG, CCAGGGACTTACTTGCATTAA, CCATTTGACAAAGCCTGGAAA, CCTGAAAGGAAGGGTGTCTTT, CCTGAGATATTACCTCATTAT, GACCTGCTGCAGAACCTTATA, GCACAAGTTCTGGATAAGTTT	8	88828, 51782, 25753, 54259, 87754, 21194, 510, 5946	0.151	993	0.0796	1198	0	1	1	2
Arl13a	GAGGCAAGACAGCGCTTAATA, GATCATCTTAACTCGCATAAT, GTGACTAAGCAGACGACTAAA, TACAAGTTCACGCACACTAAC, TCGACAACAAATACCCAATAT	5	69460, 7768, 22284, 50370, 3394	0.1512	994	0.0685	1032	0	0	1	2
Krtap2-4	CCCAGTTCACCCAACCGTAAA, CTATCAAGTTCTCCATATATA, GGAGCAGAGAGACACCACTTT, TCTGCATAGCTCTAGACATAT, TGAACAGAACTCGTCCTACTC	5	7711, 22561, 78329, 3574, 19734	0.1513	995	0.0686	1036	0	0	1	2
LOC100861711	CCTACTGGAACCTCACTGTTA, GAGGATGCAGTGACTTATGAT, GTGACTTATGATGATGTGCAT	3	11974, 766, 17916	0.1514	996	0.0415	626	0	1	1	1
Olfr136	GCATACATAAACTGGATCATT, GCCATTGTGTGGCATACATAA, GCTGTTCCTCTGTGCTTAATT	3	62246, 9561, 8011	0.1514	997	0.0415	625	0	0	0	2
Tpte	CCTGGAAGTACAAATCATAAT, CGAATTGGATAATACCCATAA, GCCTGCAAATATTTACAAGAT, GCCTTCAGAATATTTGGAATT, GCGTATTATTGCCATGTCATT	5	50998, 8614, 917, 11587, 33192	0.1515	998	0.0687	1038	0	1	1	2
Ccdc144b	CAGTATAAATGGGAAATCGAA, CCACTTGTCCTAGAGACAGTA, CCAGAATGCAATTCATTCATA, CCTGAGAACAGCTTGACCATA, GCAGCGTATGAAGACAAGCTA	5	86771, 2544, 16015, 8073, 71574	0.1516	999	0.0687	1037	0	0	1	2
Slitrk1	ACGTTAACTTCGCACAGTAAA, ATTCCTCTGCGTCCGAAATTA, CCCTGGTACTTTCAATGCCAT, CCGAAACTGAGGATTCTTATT, CCGATGGACATGAGTAAATAA, CCTGCTAATGTATTCCAGTAT, CTTGGCTGATTTGAAGCCTAA, GCCGAAACTGAGGATTCTTAT, GCTCTACATGGATAGTAACTA	9	21051, 36603, 66102, 24891, 39466, 18298, 80488, 1351, 5107	0.1516	1000	0.0905	1357	0	0	1	2
9530008L14Rik	CATCCCACAGATTGGAAGGAA, CCCACTGGGTATTATCATCTT, CGCAATGCATACCTCCATATT, GCAGAGTAAGACCCTGTCATT, TGCCATAGCAAAGCCACAGAT	5	83949, 84896, 7856, 7304, 4874	0.1517	1001	0.0689	1042	0	0	1	3
5730403B10Rik	CAAAGCCTACATCTGCACATA, CACCCACCTATGGGCTATTAT, CGCAGTTTGTAGTTTCATTAA, CGGCCACAGTATTGGTCCCAT, GATGAACTTTGTGCTGGGTTT	5	7569, 66458, 4089, 80860, 84765	0.1518	1002	0.0689	1043	0	0	1	2
Ankrd34c	CAGGCAAAGGACCTTTAGATA, CATCACCCAAAGTGGAAGATA, GACTGATGGAAACTCTCTCTT, GCTCTGGTTTATGCAATAAAT, GCTGTTGTTGTGCATACTAAA	5	32294, 8077, 20816, 91012, 2581	0.1518	1003	0.0689	1040	0	0	1	2
Man2b2	CCCGTGATGAATGACTGCTAT, CCGGACCTTCTTCATTAAATT, GCACACTGGTAACGGACATAA, GCAGTATTTCTACAGGTACAT, GCCCATCTCATCTCTCGTATT	5	57454, 12074, 1281, 63436, 8516	0.1519	1004	0.0689	1044	0	0	1	2
Vars	CCCATCGTCTTCGATGACTTT, CCCGACTGTTTCTTGGAAGTA, GCAAAGAAACGGGAGAAACTA, GCATTCTTGGATGGACAACAT, GCCTACTTTATCACCGTCCAT	5	49137, 32600, 7002, 5830, 81424	0.152	1005	0.0689	1041	0	0	0	2
Asb11	CAAGGCATCAACGTCAATCTT, CCAGACACTTGTGCTGAACAA, GAGAGTTGATTGTGTGAAGAA, GCAAGGCATCAACGTCAATCT, GTTAACATTGAGCAAGAGGTT	5	78112, 8041, 2733, 62041, 14458	0.1521	1006	0.069	1045	0	0	1	2
Lyn	CGCGAGAGTCATCGAAGATAA, GACATGATTAAGCATTACCAA, GAGTCACTCATGTGCAAGATT, GCCAAGGTCAACACCTTAGAA, GTGGCCTTATACCCTTATGAT	5	59330, 5669, 49165, 29130, 7065	0.1521	1007	0.0691	1046	0	0	0	2
Vmn2r52	CCACAAATATGCTTTGGCATT, CCTTGGGATTAAGGTGAAGTT, GTTAGGAAAGTTCAGCCCATA	3	5734, 30573, 10389	0.1522	1008	0.0417	633	0	0	0	1
Rbbp8	ACGGCTGTTGTAGTCTATAAT, ACTTAAGCAAGCCACTATTTA, ATCCGACAGCAGAACCTTAAG, GATAGCAGTCACTCACGATTA, GCAAGGTTTACAAGTCAAAGT, GCATCCAATGACTTCAAGGAA	6	45621, 183, 43074, 49355, 70272, 7791	0.1523	1009	0.0741	1109	1	1	1	2
H2-D1	ACACACTCCAGCAGATGTCTG, AGTGGTGCTGCAGAGCATTAC, CCCTCAGTTCTCTTTACACAA, GACTCTTACATGGTGATCGTT, GGTACATCTCTGTCGGCTATG, TCTGGGTGTCCTTGGAGCTAT, TGAAATGTCTCTCCGAGATTG	7	53130, 91297, 2068, 6201, 90088, 55650, 83807	0.1526	1010	0.0764	1141	0	0	1	2
Ftcd	CATCGACATGAGCAAGCACAA, CCAGTATTCCTTACCTATCTT, CTGAAGGACATGACGGATGAT, GAACGGATCATCGAGTACCTA, GCATTCAATATCAACCTGCTA	5	834, 8708, 11518, 12517, 10624	0.1527	1011	0.0697	1049	0	1	1	2
Triml2	AGGAACTGGCAGCCTACAAAG, CAAGAAGCTGCTGAGTATTAC, GATGATCGAGGCTGAGTATAA, GGAGCGATTAAACCAATATTT, TGATGACCAAGTCATAGTTTG	5	52587, 5025, 54713, 36003, 7313	0.1527	1012	0.0697	1050	0	0	0	2
Ppp1r12c	CCTGGCTGAGTCAGATGCCAT, GAAGAAGAATTGCTGCTTCAT, GATGAGAACCTGGAAGTCGTT, GCTGAAGAAGAATTGCTGCTT	4	21931, 8450, 47942, 6301	0.1529	1013	0.0562	849	0	0	0	2
Ube2n	AGCACCTAAAGTACGTTTCAT, CAGAACCAGTTCCTGGCATTA, CCTGGCATTAAAGCAGAACCA, GATCCATTAGCAAATGATGTA, GCTTTGTTAAGTGCTCCTAAT, TGTAGACAAGTTGGGAAGAAT	6	61566, 7465, 59949, 63774, 1253, 16299	0.1529	1014	0.0744	1119	0	0	1	2
Ccdc109b	CATCATTAACAAACTACGGTA, CCAGTTTGTAGTCAAGCCGAT, CTGATAGCTTACCAACTGGAT, GTCCTTGGTTCACAGACTATT, TAACAAACTACGGTATGATAT, TTGTCGACAGTAGGCTCATTC	6	54954, 41896, 6755, 3383, 42614, 69555	0.1529	1015	0.0744	1121	0	0	1	2
3632451O06Rik	GCACAAGAATATGCAGAGAAA, GCTGCAATTTAGAAACTCATA, GTCAACTCCTTCAACCTGTTT	3	6999, 10027, 10947	0.153	1016	0.0425	642	0	0	0	1
Ttc5	ACATTCTCGCCACGTCATGGA, CCAGAAGACATTAACAACATT, CGCTCCTGGTGTGAGTGTTAG, CTCACCCACTGCAAGAACAAA, GACTCCTGATTATAGCCCTGA, GAGACACATAGTGTCGAAGAT, GCAGGATGTACAGGAAGAGAT, GGAGAACATCTCCTGGTTTGT, TCTTAGATCTCTTGATTTAAG, TGAGTGTTAGGAGAACATCTC, TGGATGCCAGAAGACATTAAC	11	71054, 51138, 46704, 2815, 47023, 9111, 29635, 3843, 36266, 22485, 41751	0.153	1017	0.0936	1397	0	0	2	3
Tcerg1	CCCGATATAAAGCGGTGGATA, CCTCGGTACTTGCTTCTCAAT, GCAGTTTCTGAGTGGACTGAA, GCCTATGTTGATGACCTGGAT, GCGGAAGAGAGATGATAATAA	5	68249, 46505, 18711, 586, 8815	0.1531	1018	0.0701	1052	0	1	1	2
Fam54b	AGCCCTCAATGAACGACTTAA, AGCTGGATTACTCGCTGTTTC, CAAGACCTGAGCCGGAGTTTA, CCTCCACTCTACAACTTCCTT, CTCCACTCTACAACTTCCTTT, CTGATTGTCATGCAACGTAAT, GACGCAGCTTCGGCTTCATTA, GCCCTCAATGAACGACTTAAT, GTAAGAAGAATTGGGACCAAT, TACACGCCCTCTGAGACATAC, TCGAATGTCTCTTCGCCTTTG, TCTCTGACCTGTGTTTGAAAG	12	28570, 3834, 20938, 25255, 81815, 38584, 88059, 60351, 44555, 6670, 1833, 68729	0.1532	1019	0.099	1470	0	0	2	3
Mctp1	CCACTGAGATACATTGTTCTT, CCAGTAAGTTTCAGACCCAAA, CCGGAATGTACCAGTTGGATA, GCAATTTGATTTCCATCTCTA, GCTGCTTCTAAGAAACTTTAT	5	9021, 22857, 27537, 29024, 3	0.1533	1020	0.0703	1055	1	1	1	2
Tmtc1	CCAGAAATACAGAAACTCAAA, CCAGATTATCACTAAGCACTT, CCTTACAAGGTTCCTTACCTA, GCTGAAGGAATCCATTAAATA, GTCAGACCAAAGAAGCTGAAA	5	8203, 50080, 13161, 2462, 15331	0.1533	1021	0.0703	1053	0	0	1	2
Pum1	CCAACTTATGGTGGATGTGTT, CCCTGCTGTTTACTGGTGTAT, CCTGCTGCTTACTATGACCAA, CGCTCTATGGATGAATTGAAT, GCTGGGCATATAATGGAATTT	5	30172, 55737, 89153, 7692, 4017	0.1534	1022	0.0704	1056	0	0	1	2
Gpr81	CATCTTGTTCTGCTCGGTCAA, CCCTTGTATATTACTTCTCAA, CCTCTGGACTTTGGTCATCTT, CCTGGAAGTCAAGCACTATTT, GCTGTGGATAGGTATTTCAAA	5	825, 91249, 59573, 27362, 8758	0.1535	1023	0.0705	1058	0	1	1	2
Frk	CCAACATTTGAGACCCTGCAT, CCCACAGCAATTCTACAGCAT, CCGAAGCCATTCGTACTAATA, CCTGAATGAATTCGTGAACTA, GCACTTTAGAAGATCCCATTT	5	52933, 2809, 53437, 61656, 8097	0.1535	1024	0.0705	1057	0	0	1	2
Mccc1	AGTCATAGCTGTGACGTATAA, CCTGGTATTAATCCTGAAGTA, GAGGCGAAGAAGTCTTTCAAT, GCAGATTGACAACAAGTCCTT, GCAGTGAACTGTGTCCAGAAA, GCATACCATAAAGGCTCCAAA	6	55866, 25509, 7653, 91741, 812, 87141	0.1537	1025	0.0754	1130	0	1	1	2
Gpr139	CTTAACGGTTGACAGGTATAT, CTTCTTTCTCTACTGCTTCAT, GACAAGATCATAGAAGTTCTA, GTTTACCATTACCTCCATCTT	4	3573, 87914, 33880, 9417	0.1537	1026	0.0568	858	0	0	1	2
Cd244	GCAAGCCTTCTGATTCCACAT, GCAGTTACAGTTCAGCCCTAA, GCCCTAAGGAACCTTTGACAA, GCTGGAGATGATGTAGTTTAT	4	8355, 84993, 28546, 6762	0.1538	1027	0.0569	861	0	0	0	2
2012-03-01	CCCTTGCATTAGAAACTACAT, CGAAAGAAAGATGACCACATT, GAGAAGAACTTCCCGTGTAAT, GCAAGTCGATCAAGTAACATA	4	9450, 3483, 44621, 62780	0.1538	1028	0.0569	859	0	0	1	2
Golph3l	CAGTGGGAACAAGACTAATTT, CCACTCATCCAGTGACCAATA, CCCTCTAAATTGTGTCTTCTT, CCCTGGAGACTCTAAGGATAT, CGAACCAAGGACCTAGTAGAA, GACAGAGAAACAGCGACTAAT, GAGACATGGAACCCTTTCAAA, GATAAGATGCTATCATCATTT, TGCTGGATGAGACGCTCAAAC	9	86811, 34299, 75578, 5355, 18469, 79715, 853, 18953, 17090	0.1538	1029	0.0926	1377	0	1	1	2
H2-M10.2	CGAAAGACTTCTTAGGTACAT, CGCTTGTCACTGACAAACGAA, CGGCTATGAGTTCATCAACCT, CTATGAGTTCATCAACCTGAA, CTGACAAACGAAAGACTTCTT	5	24638, 7838, 73695, 3669, 16561	0.154	1030	0.0711	1066	0	0	1	2
Akap6	AGGATATTTGCGAGGATATTT, AGTTGGTTGACATCCTATAAG, CCAAATTGATGGTCCATTAAA, CCCTTGATTTGATTGTAGTAT, CCTCAAACAAACGGAGGTGTT, CGCCGAGAAACAACTCCAATA, GCCTGGTCCTTGTGAAATGAT, GCCTTTCACTACCAAATGATA	8	4878, 4075, 29884, 54148, 65780, 89026, 68905, 27470	0.154	1031	0.0835	1255	0	0	2	2
Vmn1r48	CAACATCTTACTCTATCCATA, CCAGTCTTTCCCTCAAAGCAT, CCCTTGAGTTACCTCATGCAA, CCTTCTTCTCTTCCATATCAT, CCTTGAGTTACCTCATGCAAA, GCGCAAATCTTCTCATAACAT, GCTCTCTTCTACCCTTGAGTT	7	3643, 9117, 31444, 68248, 5742, 49410, 42915	0.1541	1032	0.0776	1164	0	0	1	3
Ndufs7	CACTACTCCTACTCGGTTGTT, CAGGCTGATGTGATGATTGTA, CGCAGAGTTCATCAGAGTGTA, GCGCTATGACATGGACCGCTT, TGGCACGCTTACCAACAAGAT	5	9336, 66611, 27752, 7459, 4850	0.1542	1033	0.0711	1067	0	0	1	3
Hhip	AGGTTGTATAACAGAAGGATT, CCGAACAAGTGCCTCTGTAAA, CCTGAAAGAGATGTCCTGGAT, CCTGGCATTCCATCCCAATTA, GCTGGATCTCACAAGTTACAT	5	7131, 5870, 26204, 56780, 89959	0.1544	1034	0.0713	1068	0	0	0	2
Olfr742	CCTCTTCATCATGGGAACTTA, CCTCTTTGTGACCTTCTTCAT, CTGTGTTTAGACTTCCTTCAA	3	10371, 6343, 40605	0.1545	1035	0.0439	673	0	0	0	1
Zfp566	CCGGAGAATGTCGAAACAGTT, CCGTATGAATGTAAGATTTGT, CCTATTCAGCATCAGAACTTA, CGGTGGGAAGAACTTTATCTA, GCCTATTCTCAGAGTTCACAA	5	22484, 7612, 4464, 17175, 62139	0.1546	1036	0.0716	1073	0	0	1	2
Srf	ACTGGCTTTGAAGAGCCAGAT, AGCAGCAACCTCACCGAGCTA, GATGGAGTTCATCGACAACAA, GCCAGCATTCACAGTCACCAA, GCCATGTGTATACCTTTGCCA, GCTCAATTTGCTATGAGTATT	6	34354, 26689, 7978, 20892, 19371, 5	0.1548	1037	0.076	1136	1	1	1	2
LOC100862477	GCCCATTTAACGGTGAAGAAA, GCTTTGAAACCACAGATGATA, TGCCCATTTAACGGTGAAGAA	3	11840, 67370, 2027	0.1549	1038	0.0444	680	0	0	1	1
Xrcc4	CCGGCTTTGTTATTACACTTA, CCTTCAACCTAGACAAAGTTT, GAGCTTGCATAAATTGCTAAA, GCACTGGTGTTCAATGAACTA, GTCTTTAGAAACCCTGAGAAA	5	74461, 8202, 7655, 4415, 38420	0.1551	1039	0.0718	1079	0	0	1	3
Cdkn2d	CGCCCTGAACCGCTTTGGCAA, GCCATCTAAACGGTTCAGTTT, GCTCAGAACCTCATGGACATT, TCAGCTTCCTAGCTCCTGAAT, TGGCGATAAGAGAGGGCCATA	5	41963, 36798, 79139, 6197, 7071	0.1552	1040	0.0718	1077	0	0	0	2
Slc5a4b	CCAGTAACTGTCCCAAGATTA, CGGATAGACTTGGATGCAGAA, GCAGACTTTCATCATGCTGCT, GCCGGGACTGATATTTGGAAT	4	3640, 87745, 9501, 85722	0.1553	1041	0.0577	866	0	0	1	2
Ncf1	CCCATCATCCTTCAGACCTAT, CCGAGATCTACGAGTTCCATA, CGGCTATTTCCCATCCATGTA, GAACCGTATGTAACCATCAAA, TGTGTACATGTTCCTGGTTAA	5	5795, 32638, 64682, 7221, 12041	0.1555	1042	0.0721	1084	0	0	0	2
Khk	AGCTATGGTGAGGTGGTGTTT, CATCATCAATGTGGTGGACAA, CCGTACCATTATACTCTACGA, GCAGCGGATAGAGGAGCACAA, GTGGACAAATACCCAGAGGAA	5	8400, 38789, 2275, 53985, 40624	0.1556	1043	0.0722	1086	0	0	1	2
Etv5	ACAACTATTGTGCCTACGATA, AGGAAGTTTGTGGACACAGAT, CAGTCTGATAACTTGGTGCTT, GCCAGCCATGAACTATGACAA, GCGACCTTTGATTGACAGAAA	5	6789, 43460, 85349, 24743, 6909	0.1558	1044	0.0724	1088	0	0	0	2
Lgsn	CCACATGCTTCAATAGTGATA, CCTAAGGACAATGAGGTGAAT, CCTGTAGAGATATGATGAGTA, CGCCTCAACTTTCTGCTAGAA, GCCTTGTAATTGAGACTGGAT	5	29036, 7600, 65011, 56755, 4742	0.156	1045	0.0727	1091	0	0	1	2
Rab1b	ACACCACGGCCAAGGAATTTG, AGTCCTACGCCAACGTGAAAC, CATGGCATCATTGTGGTGTAT, CCACGCACCTTTCTTTGGAAT, GACCATCACTTCCAGCTACTA, GATTTCAAGATTCGAACCATT, GCCAAGAATGCCACCAATGTT, GCGGTTTGCTGATGACACTTA	8	29624, 4883, 19210, 29532, 45915, 5060, 82242, 4317	0.1561	1046	0.0857	1291	0	0	2	3
Bdnf	CCAAGTGTAATCCCATGGGTT, GAAGTAAACGTCCACGGACAA, GCAGTATTTCTACGAGACCAA, GCCCTTACTATGGATAGCAAA, TCCTAGAGAAAGTCCCGGTAT	5	14060, 3447, 49390, 8044, 24478	0.1562	1047	0.073	1094	0	0	1	2
Pdik1l	CCAAATGTGATTCACTTGGAA, CCACACTCAAAGTGGCTGATT, CGGAGGAGATATGAATGAGTA, GAACTCAGATTAGTCCAAATT, GCGAATGAAACAACTGATAAA	5	85475, 12283, 54728, 8957, 712	0.1562	1048	0.073	1095	0	1	1	2
Olfr154	CCAAATCTCATCAATCACTTT, CCATCTCCAAATTGTCCTCTT, CCTGCTCCTCTTCTGTCATAA, GAGTTCTTCTTCACTGGATTA, GCCAGTTTGTAGTGACAGAAT, GCTTTGTTTATTTAGCCAGTT	6	78187, 22095, 3373, 6929, 18851, 82869	0.1562	1049	0.0769	1147	0	0	1	2
Pask	AGCAGTGTGGACACGTGTAAT, CCAGTCCTTAAAGAACATTTA, CCTGAGGTTCTCATTGGAAAT, CCTGGGCAAGAATATCACTTT, CGAGCAGAACTGTCTAACATT, GCGAGTTTCATCTTTCGACAA, GCTGCCAGATGGCACAATTTA, GTGAGGGCGAGTACGACTATA	8	65252, 5720, 20587, 40899, 77542, 37612, 91484, 1823	0.1563	1050	0.0857	1292	0	0	1	2
Pls1	CAGTGGATATGTTAGTGACTA, CCAGCCGTTAAGTATTTATTT, CCAGGACATCAAGGATTCAAA, CCCGTACATCAATCACCTGTA, GCTGGATTTATGCTCCAGGAA	5	8661, 56805, 10032, 61646, 1629	0.1564	1051	0.0733	1097	0	0	1	2
Gm9746	CCATCCTGATTGCTTACAGAT, CCTGATTGCTTACAGATCAAA, CCTTCCTAAGGAATGGGTATT, GAGTCCTTGTATGCCTTGGTT, GCAAGTTTCTCTCCACCTCTT	5	77913, 60209, 3808, 24498, 7941	0.1565	1052	0.0733	1098	0	0	1	2
Aym1	CATTATCTCTTAGAGAGAGGA, CTCAGGTAGTTCAGGGAATAA, GAGGATGCTCTAGTTCCATTA, GATGCTCTAGTTCCATTATCT	4	44736, 10798, 64848, 12	0.1566	1053	0.0582	869	1	1	1	1
Tdgf1	CATTTCCAGTGCGTTTGAATT, CGAGTTACATTCCTAGCCTAA, GAACAGTAAGTCGCTTAATAA, GCCGTCTGTGACGACCACTTT, GCGTTTGAATTTGGACCCGTT	5	4334, 82421, 18888, 7771, 58052	0.1566	1054	0.0734	1099	0	0	1	2
Yipf5	CCACAATTATTGGATGGTGTA, CCCAATTAACTCTGCTGTGAA, GATTGGATGTTTAGGAATGTT, GCCATTCTATGGAGACAGCTT, GCTTTGTTGTATGGAGTCTTT	5	39539, 7919, 53191, 3906, 70863	0.1567	1055	0.0736	1102	0	0	1	2
Ikbkap	AGTATGACAGAGTGGATATTA, ATATCTGCGAGGTCATCTAAA, CCTCAGTTCCTGTTGTTCATA, CGCATCAAATATCACGTCATT, CGCTGAGTGAAGTGGTACAAA, CGGAAGTAGATCCTGTGAGAA, GCATCAAATATCACGTCATTT	7	46770, 86327, 36959, 17353, 1093, 38887, 6717	0.1569	1056	0.0805	1210	0	0	1	2
Rrn3	AGAAGTTCATTGATCCTATTT, CCCAACTTTGAGGCGTGAAAT, CCTATTTATCAGATTTGGGAA, CCTGAATTTCATTCTGTCTAT, GAGAGTGGTGGAGGAGTATTT, GCAAATTATATTGGGAGCTTT	6	57648, 1628, 83626, 7545, 90238, 89350	0.1569	1057	0.0777	1167	0	0	1	2
Vmn1r235	CCATTGTCATTTCTGGGTGTT, CCCAAGCTGGTTACTCATAAA, CCCTAGGTATAATCTTCTTAT, TCTTTGTTGCACTCTGAACAT	4	10763, 23637, 59416, 202	0.157	1058	0.0585	873	1	1	1	1
Spata2l	CAGATTCTGGTGGAAGACTTT, CAGGTGGATAACCTGCTCTAT, CCCGACTCATTCACTGCGCAT, GAGAAAGGAGTTCACCACTAT, GCAGCTAACCAGGAAGAAGTT	5	8966, 70551, 75517, 843, 9080	0.1571	1059	0.0739	1105	0	1	1	3
Olfr1245	CCAAGTTGATTGTGGATTTAT, CTCCATTATTGGTACTTGCAT, CTTATTGTGGTGACAGTCATT, GCCCGACCAGTTTACAACTTT	4	9614, 89923, 3684, 72569	0.1571	1060	0.0585	874	0	0	1	2
Itm2a	CCAAAGAATCTGGTGGAACTT, CCCTCAATACTTCCATTGTTA, GATGTTAGTAACCTTGGTATT, GCAGCATGAATGTGTCATCTT, GCGGCAATTATTCACGACTTT	5	40530, 6671, 11435, 37309, 7031	0.1572	1061	0.074	1106	0	0	0	2
Fbxo24	CAGAGAACACTGTGTGTACAT, CCAGAGCAGTACCCTCTATAT, CGCTCCTATACAGTGCAGTTA, CGGATCTTTATGCAGGGAAAT, GAGCTGCCATTCTTAACTATA	5	27843, 1786, 8666, 9474, 87350	0.1574	1062	0.074	1108	0	0	1	3
Tmem25	CCATCCAACCTTCAGCTCAAT, GCCCTCTTAAGTTCAGGTCAA, GCCTATTATATGTCCTACCTT, GCTCCCAACATGAGCTTAACT, GTGCAATTCAAACCAGAGATT	5	7587, 18425, 5041, 81112, 75740	0.1575	1063	0.0741	1110	0	0	0	2
Defb41	CAGAAGTCATATTGACATCAA, GAAGTACTACTTACTGTCCAT, GAGGAATGTGTAAGACCGTCT, GAGTATGATTATGGATACTGT	4	3323, 74365, 16847, 9764	0.1576	1064	0.0589	881	0	0	1	2
Oit3	CATCGAAGGTTGTCACAACAA, CCACTCATACATCTAAGTAAA, CCCACTGCAAAGATGGATGAA, CCTAGATCCTTGTTCCGCTTA, CGACTCACTCTACTTTGGCAT	5	85361, 49439, 18669, 5659, 7391	0.1576	1065	0.0742	1111	0	0	0	2
Srek1	ACAGGAGTAGATCCCATAATA, CGAAGGTAAAGTACAGCACAA, GCAGCTAAGGAGTTAGAAGAA, GCCTTCTACAATGTGTGGTAT, GCTGATCAACTACTTGAATTT	5	5665, 17912, 51692, 22615, 7392	0.1577	1066	0.0742	1115	0	0	0	2
Best3	CCAGCTCCCTACTTTACATAA, CGTTGATCTACAATCACTGAT, CTGGGAAACTTAGGTCCAGAT, GCTGCTGTACAGGGAATTTAT, TGGTGGAACCAGTTTGTGAAT	5	7397, 48460, 75927, 5670, 35721	0.1578	1067	0.0742	1113	0	0	0	2
Neurl3	ACATCTTCAAAGACACGGCCA, CATTGAGCTTCTGGATCCCAA, CCAGAGTCTGAAGTCATATCA, GAACCGTAGAGGGTGGCTCTT, GTTCCACGATGGTATCGTGTT	5	84284, 4127, 14994, 17375, 7913	0.1578	1068	0.0742	1114	0	0	1	2
Ceacam14	CTCTACGGATACTTGATGCAA, GAAGTCCAAGTAAACAGTAAA, GTGGGTCTTTCAGATGCCAAA, TCGGACTTTCACATAGTGGTA, TCTACGGATACTTGATGCAAA	5	4373, 90553, 25861, 41228, 7834	0.1579	1069	0.0742	1116	0	0	1	2
Gm4937	CACCAGAGTATGTTACCAATA, CACCATTATTGCTCTTTCGAA, CCACCATCTTTCAATTTGCCT, CCAGAGTATGTTACCAATACA, CCAGGAAAGATAATGAGTATT, CCTGCAATCCATTTAGACTTT, CCTTCCCACCATCTTTCAATT, CGATGGCTCCATTCATTTATA, CTTTCTACTAAGTGGCACAAT, GCACTATGAAGATCCTGTGAT, GCCACGGCTTTGGCAATTATA, GCCAGGAAAGATAATGAGTAT, GCTTTCTTTACCTTGCTGTTT, TGCCACGGCTTTGGCAATTAT	14	37956, 37856, 33475, 35197, 67105, 83623, 9146, 73590, 49055, 64633, 10828, 3073, 2732, 19842	0.1581	1070	0.1036	1535	0	0	2	3
Rbfox2	CCCTCTAATCAGTCTCCCTTT, CCTCTAATCAGTCTCCCTTTA, CGACTACATGTCTCTAATATT, GCCATTAAAGAGTGTGTAGAA, GCTGTGTATGGTCCTGAGTTA	5	4202, 19941, 30063, 71209, 7908	0.1582	1071	0.0745	1122	0	0	1	2
Gm14446	AGTAACTTGGAAGATCATATT, CCTATCGCCTGGATCACATTG, GCCATAAGAAACGACTGATTC, TGGCACTTCGCTCCAACATTT, TGGCCTTTATTCATTACTAAG	5	8840, 92333, 1415, 16209, 78975	0.1582	1072	0.0746	1124	0	0	1	2
Cyp2b13	AGATGAACAGTTCCTGCGTTT, CCAGTGTGTTACAGCCAATAT, CCCGCAACGAATTGTTCCTTT, GCTCACATCTTTCCTCCTATT	4	38177, 10458, 58990, 1389	0.1583	1073	0.0594	894	0	0	1	1
Jun	ACGCAGCAGTTGCAAACGTTT, AGCGCATGAGGAACCGCATTG, ATTCGATCTCATTCAGTATTA, CAGTAACCCTAAGATCCTAAA, CCTATCGACATGGAGTCTCAG, CGGCTACAGTAACCCTAAGAT, CGGTGCCTACGGCTACAGTAA, CTACGCCAACCTCAGCAACTT, CTCAACTGTGTATGTACATAT, CTGAACTGCATAGCCAGAACA, GAAGCGCATGAGGAACCGCAT, GCGGATCAAGGCAGAGAGGAA, GCTGGCATCCACGGCCAACAT, GCTTAAGCAGAAAGTCATGAA, GGATCGCTCGGCTAGAGGAAA	15	55051, 45295, 22614, 49998, 30206, 69083, 61546, 982, 11907, 80188, 32990, 41117, 54811, 5455, 3522	0.1589	1074	0.1078	1600	0	1	2	3
Zfp708	CCACAGTTGTTCATTGACAAT, CCTTTAGTGTTCACTCAACAT, CTGTTCCGATTATCTTGTTAA, TCCCATCTTAAACAACACAAA, TCCGATTATCTTGTTAAGCAT	5	8093, 3796, 76367, 80959, 50976	0.159	1075	0.0755	1131	0	0	1	2
Klhl5	CCCTTAACCATGCAGAGCAAA, CGGAAGGATCTCAGTAGACTT, CTCAGATTATTTCGCTGCTAT, GCTCACAATTACACGATGGAA	4	8831, 26620, 6429, 66069	0.159	1076	0.0599	903	0	0	0	2
Vcl	CCAGCCTTTATTAAGGTTGAA, CCCTGTACTTTCAGTTACTAT, CGATACTACAACTCCTATCAA, GCTCGGAAGATTGCAGAATTA, GCTGGTTCATAATGCCCAGAA	5	91247, 7310, 6157, 34781, 21071	0.1591	1077	0.0758	1134	0	0	0	2
Pdgfa	AGAAGTATTGAGGAAGCCATT, AGGACGGTCATTTACGAGATA, AGTGGAGTATGTCAGGAAGAA, CAAGACCAGGACGGTCATTTA, CATTCGCAGGAAGAGAAGTAT, CCATGGGTCCCATGCCATTAA, CTCTTGGAGATAGACTCCGTA, GACATTCCTGAACATACTATG, TCCAGCGACTCTTGGAGATAG, TTCGCAGGAAGAGAAGTATTG	10	90140, 59957, 47380, 60741, 4051, 42491, 30747, 4125, 78034, 75170	0.1591	1078	0.0983	1460	0	0	2	2
Plekhg3	GCAAGACAAGCAACAAGCTAA, GCGCAATGACAGAACTTTCTT	2	15308, 560	0.1592	1079	0.0221	335	0	1	1	1
Smc1a	ACTCTATCTTCTTGTCTGGAT, CCAGAGAACATCCAGTATCTA, GCAGGCATTTGAACAGATAAA, GCGTCGTATTGATGAGATCAA, GCTTCAAATGCGGCTGAAGTA	5	8574, 37676, 2411, 50133, 52108	0.1593	1080	0.0759	1135	0	0	1	2
Cmas	CCAAGCCACATCTCCATGTTT, CCAGAAAGTTGCAGAAATGAT, CGAGGTAATTACCGAGGGATT, CTGAACTTGAATCCAGCGAAA, GCCCTAAAGCTGGACTGTAAA	5	29418, 7350, 66184, 6087, 73358	0.1594	1081	0.076	1137	0	0	0	2
Hilpda	AGTTCATGCTGAACCTCTATG, CCAGACCATCCATCCCGAGGA, CCTAAGTATCTTCTGTTGGTT, GAAGACAGAGGGTGGACTATC, GCCTCCTAAGGGCCTGCCAGA, GCTGGGCATCATGTTGACCCT, GCTTTCCATCTTTGTTAGAGT, GTCCAACCACACGTTCCATTT	8	39616, 14532, 56450, 29836, 765, 12823, 11122, 6198	0.1594	1082	0.0882	1326	0	1	1	2
Wdr48	AGACCTCCAACCGGCCTATTT, CACCATACAGACTGGGTAAAT, CGACACATATTAACCAAAGAT, CGGACAGTAAAGCACTTCATA, GCACCATACAGACTGGGTAAA, GCCGTCTTTCTAACAGTCAAA, TTAACCAAAGATACGAATAAC, TTCGAGCCTCTGGTGATTATG	8	75378, 14505, 11688, 86759, 1021, 86363, 6113, 88674	0.1594	1083	0.0882	1324	0	0	1	2
Spatc1	CAGTCAAATGACTAGTCCCAT, GATGGAACAGTCTCGGAAGAA, GCAACCAACTGACCAATCCTA, GTCTGGCCAAATACCCTTGTT	4	28763, 64029, 3517, 9829	0.1594	1084	0.0602	910	0	0	1	2
Zfp788	CCCTCCTTACTTAAACTGCAT, CCTATGAATGTAGGCTGTGTA, CGGGTCCATGAAAGAAACCAT, CTAGGAGAAGTCAAAGAATAT, GTATGAGTATAAAGTGGGATA	5	8344, 23945, 71712, 37852, 3219	0.16	1085	0.0764	1140	0	0	1	2
Mab21l3	CACGTTCACAATTCCAGAGAA, CCACCTGCTAACCACAGAAAT, CCACTGAAGAAAGTGCCATTA, CCTGCCAATGACAGAGAGAAT, GCCTATAACTTGCTTCCATTT	5	7957, 9575, 20650, 59959, 4381	0.16	1086	0.0764	1139	0	0	1	3
Scn2b	CAGCTAGAAGACGAAGGCATT, CCTCCAGTTCCGAATGAAGAT, CGTGTCAGTGACTCTAAAGAA, CTGTACCTTCAACTCCTGCTA, GCAGGTAGATAGGTGGAAATA, GCATTTACAACTGCTACATTA, GTCAAATGTGTGAGGAGGAAA, GTGTCCTCAATGGGTCCGATA, GTTCCGAATGAAGATCATTAA, GTTCTCTCTTAACTGGACTTA	10	92319, 43582, 77788, 8106, 2168, 7368, 57870, 69952, 5918, 4784	0.16	1087	0.0991	1471	0	0	2	5
Mum1	AGACAAGTCTCAGGATGATTC, AGTCCTGAAAGTCATCCAATA, ATGTTGCCCTGGCATTCATTG, CAGCCGAGCAGAAGTACATTC, TACCCTGTGCGCAAGTCTATC	5	5738, 20786, 84631, 74240, 7506	0.16	1088	0.0764	1142	0	0	0	2
Syt14	ACCTTGTTCTTCTACCTATAA, AGATGAAGCACTGGGTAAATA, ATCTTGGTTCAGGATACAATA, CCACGTTGAATCCGAGATGAT, CGGAAACTGCATTCAGAGAAT, GCAGTTAGGTTTAGACTATAT, GGCCGAGAGCTATCACAATAA, GTCACAGACATTCCAACATAT	8	55644, 42156, 5258, 16130, 33286, 9779, 77609, 3686	0.1602	1089	0.0889	1331	0	0	1	3
6330409N04Rik	CCTCTGTTAATGGACTACTTT, GAAAGTTAACTTGAACCAGAT, GATGAGAAATGACGGAGCCTT, GCTGATCTATTTCCTCTGTTA	4	69286, 642, 10842, 28746	0.1602	1090	0.0609	920	0	1	1	1
Gtf2a1l	CAAAGCCTTAAAGACAGTATA, CACCTTTACAAAGTCAATGTA, CAGATGGAAATTCTACTTGAA, GCGTATCGAATGAAGATTCAA, GCTCTGGGAAACCAAAGTGTT	5	91917, 48882, 11579, 217, 9360	0.1603	1091	0.0765	1143	1	1	1	2
Lipf	CAGCTTTGATGAAATGGCTAA, CCACAACTACTTAGATCAATT, GATGTGTATCTAGGGCATAAT, GATTACAAATCTGCCAAACAA	4	77751, 4634, 9513, 90168	0.1603	1092	0.0609	919	0	0	1	2
Ap1m1	ACAATGTAGAGATCCATATAC, CGATGCTGATTCACCCAAGTT, CGTTCGTTTCATGTGGATTAA, GCGTTCAGAAGGCATCAAGTA, TGGCGTTCGTTTCATGTGGAT, TGGTCTGTATGCCGGATAGTT, TTTGAGAACGACCGCACTATC	7	58211, 82745, 2737, 6324, 15613, 46755, 75498	0.1603	1093	0.0834	1253	0	0	1	2
2410004B18Rik	GATCAAATGGTCGAATATCTA, GATGAGCGGGCATCTAAGATT, GCCTCAAGACTTTCCACTGTA, GCCTCCAAAGGAGTTCAAGAT	4	9828, 64473, 3713, 14926	0.1604	1094	0.061	921	0	0	1	2
Gpx2-ps1	CCACCTTTAGTCTTACCCAAA, CCGATCCCAAGCTCATCATAT, CGTCACTCTGAGGAACAACTA, TCCTGTCTTTGCCTACCTGAA	4	10212, 77713, 2576, 38513	0.1604	1095	0.0611	923	0	0	1	1
Osbpl10	CGAAGAAGAACAGAGCGACAA, CTGAAGTGAAACACAACCCAA, GAAGAGCCAAGAGTCAGTATT, GCCTGTGTATCCTAAGAAGCT, GTCATTAGCTTCGTGGAGTAT	5	59628, 3143, 33473, 57090, 8401	0.1605	1096	0.0768	1146	0	0	1	2
BC028528	GAAGAGGGTGATTACTATCAA, GATAGGTTGAACAGGTTGAAT, GATTACTATCAAGTGGCATAT	3	8282, 10220, 14611	0.1607	1097	0.048	724	0	0	0	1
Cldn15	AGTGACATCAGCTTCGGTAAA, CAAGCCTTCTACGGTTGTGAT, CGTCAACATCACTACTGACTT, GCAGCATGTGACTCCATATAA, GTTGACCCTTTCAAACAGCTA, TGACATCAGCTTCGGTAAATA	6	32930, 3197, 85576, 7215, 87585, 53302	0.1607	1098	0.0831	1247	0	0	1	2
Tpst1	CCAGTCTTTAATTTCAAGGAA, CCGGTCCAGTAAAGAGAAGAT, CCTCGACATCAAAGCCAACAA, CGTCAGTACATTCAATGATTT, CTCTTAAAGTTCCTCCATATT	5	68240, 52947, 8667, 70003, 2375	0.1607	1099	0.0769	1149	0	0	1	2
Taf13	AGAATTGAAACGGGCTAGAAA, CCTGTCTTTATCTGACCATAT, CGAAGACCTTGTCATAGAGTT, CGAGTGCAAGTTGAAGATATT, CGCTGTATGATGTATGGGTTT	5	91786, 7279, 46995, 6546, 91530	0.1607	1100	0.0769	1148	0	0	0	2
Pla2g4c	CCCACAACATATCTAAGGATT, CGCTTCAAGAAGACACAAGAA, GCAAAGTATGTTCTTCAGATA, GCACTTTACTCTGTTCAACAA, TGTGCGTGAAACTCACCTCAT	5	51732, 1887, 53463, 8839, 79197	0.1609	1101	0.077	1150	0	0	1	2
Rnf219	CAGTCCAAAGTAGAACAGTAT, CCACGAGATGAGTGAAGATTT, CCCTCGAAATGAATCGAACAA, CCTGTGTTTCTTAGAACATTT, CTGGCCGATAATCCAAGTAAA	5	9150, 977, 10156, 43092, 75027	0.161	1102	0.0771	1154	0	1	1	2
1700011H14Rik	CAGAATGCCTTGGGCTTGTTT, CAGGTAGTAACGGCACAGAAT, GCAGAACAAAGTCCAACACAA, GCATTGAATCGGAACCTGGAA, GTCACACCTTTACAAAGCCAA	5	4316, 69416, 8038, 68806, 29234	0.161	1103	0.0771	1152	0	0	1	2
Actr1a	ACCCATGCAGTCCCGATTTAT, CAGAAGTCAGACATGGATTTA, CCTTGCTTACACTAATGTTTA, CGATTTATGAAGGCTTCGCCA, GAGATTGTCAAGGCCATAAAG, GCCCGATCCATCCACAGGAAA	6	6804, 43917, 70160, 24573, 4527, 54842	0.1613	1104	0.0834	1251	0	0	1	2
Myo18b	ACTCCAAAGCACTGGAGAGAA, CAGACCAAAGTGGACTTTGAT, CCTGGAGAACAAGACCGAATT, GACGACGATGTGGAAAGCATA, GCAACTGTACAGGTTGCAGTT	5	72927, 85204, 8273, 3661, 69924	0.1613	1105	0.0775	1159	0	0	1	2
Olfr971	CATCCTTATGTCCTACATCTT, CCGCTATGTTGCCATCTGTAA, CGAATTTATCTTGACTGGATT, GCCATCTGTAACCCTTTGCTT, GCTATCATGCTCCAGTATATA	5	56985, 602, 32004, 9294, 23319	0.1613	1106	0.0775	1160	0	1	1	2
Mtap1a	CCAGGAGAAACCAGCCTTAAT, CCGCAATAAGTCTGCAGAGAA, CGAGACCATCATCCTAGTCAA, GCCAACTTGAAACCCAGCAAA, GCGGAAATACTCCTTGCTCAT	5	47909, 89547, 41961, 4147, 8115	0.1614	1107	0.0775	1158	0	0	1	2
Cd3e	CTCAGGAACCAGTGTAGAGTT, GACCTGTATTCTGGCCTGAAT, GCAGTAGCCATAATCATCATT, GCCGAGAACATTGAATACAAA, GCTGCCTCAGAAGCATGATAA, GCTTGCTGATGGTCATTTATT	6	62642, 6306, 81083, 6100, 41934, 73575	0.1618	1108	0.0841	1263	0	0	0	2
Cdh2	CCAGGACTATGACTACCTGAA, GAACAGTTTCACCTGATATTC, GAACGAAACAACCAGATTAAA, GCAGGCAAAGTTCCTGATATA, GCAGTGGACATCAATGGCAAT, GCCATGACTTTCTACGGAGAA, GCTGTAGTTAGAATACTCAAT	7	46596, 7147, 13915, 61212, 80497, 483, 10975	0.1619	1109	0.0848	1275	1	1	1	2
AU021034	CAGAGTCTTCAGCCATGCAAA, CCAACAGCATCTGGGTTACAT, CCACATAAATGCTGCCAATAA, GTACAGCATCATGAGGATTTA, GTTGCTCCTCAAAGGACTATT	5	47175, 567, 9339, 70931, 50365	0.1619	1110	0.0775	1156	0	1	1	2
Gm4477	ACTTCACCTCTCTGTGTCATT, AGTTGTCCTTTCCACCAGCAT, CCACAGGAGTGTGGTGGATTT, CTGGTTCTTCTGTCCATCCTT, CTGTCCATCCTTACCCTCTTT	5	9220, 74862, 931, 27798, 13816	0.1619	1111	0.0775	1157	0	1	1	2
Vmn1r46	CATCACCCTTAGTCCAAGAAA, CGACACAAACATGAAAGTCAT, CGATTACTGCTTCTCTGAATT, GTCTCTTAGCAGTGAACTCTT, TCTACCACATGCACATTTCTT	5	3113, 79811, 8499, 23204, 13016	0.162	1112	0.0776	1163	0	0	1	2
Scd4	CCGTTGTCTTAGCCAGGATTA, CCTTCGTTTCAATGGCATCTT, GCGGTATGCTGTGCTTCTAAA, GCTCTCATAGTGATTGGGTAA, GTCTCGAATTTCCTGCGGTAT	5	8566, 26259, 2917, 91540, 30013	0.1621	1113	0.0776	1162	0	0	1	2
Ifitm7	CCTGATTATGTGGTCTGGTCT, CGGGCTTGCTATGTGTTCTAT, CTTCTTCGACAACCACCATAA, GAGATCTCCAAGCCTGATTAT, TCATCACTTTCTTTGCCACTA	5	71565, 70486, 17568, 7197, 7034	0.1621	1114	0.0776	1165	0	0	0	2
Cep135	CCAGTATGTTCACAAGGTCAA, GCAGATGTCAAACGAGAAGTA, GCGCGTTATCTGAGTTGAGAA, GCGGAGATCTTGTGCGATTAA, GCTTTAATAATCTGTGCCTTA	5	27810, 50487, 7861, 5065, 53358	0.1622	1115	0.0778	1172	0	0	0	2
Syvn1	CCACCAATTCCTGAAGCAGAA, CCGCAACATGAACACACTGTA, CCTCAAATGTTTCCATTGGTT, GCCTTCAAAGTAGAAGCTGAA, GCTGGTATTTGGCTTTGAGTA	5	62042, 1082, 52327, 72598, 9191	0.1623	1116	0.0778	1170	0	0	1	2
Mr1	CAGTGGTAAGAACAACTCGAA, CCACCACTAATAACAAACAAA, CCTCAGAGCAATGATGTTTAT, GCTTCACACCTACCAGAGAAT, GTCCCTGAATTTATCTCTGTT	5	55306, 75076, 8478, 3229, 86147	0.1623	1117	0.0778	1173	0	0	1	2
Herc2	ACCGATAGGACCTAGTGTTTA, CCACAGAATTTGGGCAGTCAA, GCCTCCAGAAACATTGTGAAA, GCCTGCTCATTAGTAAACTTT, GCGCTACTTCATTGCCTTGAA, GCGTTATTAACTTACTGCAAA, GCTGCGCAGAGACCCATAAAT	7	12355, 48552, 6832, 85825, 1493, 79075, 89909	0.1624	1118	0.085	1280	0	0	1	2
Lctl	CCACTCGATACATCACTCAAA, CCCTATTTACGCTGGTGACTA, CTCTCCACCTTCATCTGTCAA, GATAAGTTTGAATGGGAGAAA, GCCTGTGACAGCTACTATAAA	5	16877, 40754, 41574, 7259, 6896	0.1624	1119	0.0778	1169	0	0	0	2
Tmem218	CCTCGGAGCTCTGATCATTAC, CCTGCTTCTTACTCATCATTT, CTGGAGCCAATCTATGCCAAA, GCGGTTATTGACCATTCCTTA, GCTAGGTTCTCCATCGTCTTT, GGTCCTGCTGAGCATAGTAAC	6	16652, 64037, 83700, 8236, 411, 92057	0.1624	1120	0.0846	1272	1	1	1	2
Rxfp1	CCACCGAACATATTTAAGGAT, CTCTGGCACAACTACAGACAA, GCCTATCAACAGTGCTTTGAA, GCTCCGTAACAGTAACCGAAA	4	80503, 76786, 8889, 6961	0.1625	1121	0.0629	941	0	0	0	2
Ddx25	CAAGACCACTTCAATAGCAAT, CAATGTTATCAAGTTGCGAAA, CCAATGTTATCAAGTTGCGAA, CCTTTGTCTTAGCAATGCTAA, GCCTTCGTTGTTTGTGGGCTA	5	34272, 5922, 91098, 16357, 7611	0.1629	1122	0.0782	1178	0	0	0	2
Zfp57	CCAACACACTCAGAATGCAAA, CCGACGTGCTCATTTAGGTTA, CCTGACATTTGTCGGAAGCAA, CGACGTGCTCATTTAGGTTAT, GCTGCCAAAGACCAATCAGAT	5	9275, 21915, 67260, 55067, 1003	0.1633	1123	0.0785	1181	0	0	1	2
Acads	CCTGGATTGTGCTGTGAAGTA, CCTTTCACCAATGGTGACAAA, CGCATCACTGAGATCTACGAA, CGTCAACAATTCTCTCTACTT, GCGACGGTTACACACTGTTTA	5	68368, 9793, 8930, 20868, 2042	0.1633	1124	0.0785	1183	0	0	1	3
Krt26	AGCCGGTATTTCTCAGTCATT, CGACTTGGAAATACAACGGGA, GCAGCTTAGAAGAAGGTTTAA, GCTATGAAACAATCCTACGAA, GCTGAAGAGCTAGATCAACTT	5	22155, 89619, 7316, 57876, 6893	0.1633	1125	0.0785	1182	0	0	0	2
Tbc1d23	CCCAAACTGTTGTATTTCATT, CCGGACATCAAGCATCACTTT, CCTCGCACACTTCTTACAGAA, CCTGAGCAGAACACTATTCAT, CGGGATAGAAATCTTGGCTAT	5	8619, 89304, 58557, 2997, 54294	0.1634	1126	0.0785	1179	0	0	1	2
Olfr560	GCCATGATCTCTACTGTTGGT, GCTATGGCTTATGATCGTTAT	2	12371, 10622	0.1635	1127	0.0231	351	0	0	0	0
Rassf3	ACCGGGAAGACCAAGTGTATG, AGAGAAGGAAACGCACAATTA, CATAAATACAATTCAGCCGTT, CCCACCAAGTTTGCGCTTTAT, CCCAGCTCTTAGCCTTTCTAT, CTTCACATCAGCAGTACAAAC, TGGCTTCATTAAGGTGCAGAT	7	69774, 921, 48516, 50557, 7082, 73083, 26867	0.1637	1128	0.0865	1302	0	1	1	2
Lhcgr	CCAGTGAACTTTCTGTCTATA, CCCATTTCTGTACGCAGTGTT, CCTCCTCAATCTGTCTGAAAT, CGAAGGCATTTCAGAGAGATT, GCACAGTTAGAGAAGCGAATA	5	35307, 25557, 8243, 44453, 4181	0.1637	1129	0.0789	1188	0	0	1	2
Brsk2	ACAGCGTTATTTCCCAGACAA, CTACTCAGTCACATTCACTTT, GAGAGGAACAACATCCGTATT, GCAGAGCTAGAGTTTGTGTTT, GCCTCAGCCACAGCGTTATTT, GCGAGAGATTGCCATCTTGAA, GCTGGGCTGAGACCAGTATTA, TGAAGGTGGAGCGAGAGATTG	8	82262, 9384, 16982, 48473, 1790, 6033, 56992, 39224	0.1637	1130	0.0925	1376	0	0	1	3
Gm6265	CATGAAAGATTTCGAAGAGAT, CGTATGCAGAATTCTACAGAA, GTTGCCGCTGCCTATAAGTTT	3	28407, 576, 13040	0.1638	1131	0.0497	751	0	1	1	1
Commd3	CCAACCAACTTCATAAGATGT, GAACAATGATTCCCAATCCTA, GCACCGAGTATCAGAACAATA, GCGCTTGGAGTACCAGATAAA	4	9704, 39889, 15857, 4797	0.1638	1132	0.0638	955	0	0	1	2
Zfp36l3	CTCAACACTAATGTGGCTGAT, GAGAGACCTGAACAGCTACAA, GAGCGCTATAAGACTGAGCTA, GTTGCTATTGCTCCAGGAGTT	4	41148, 71553, 5828, 9361	0.1638	1133	0.0638	956	0	0	0	2
Rnase4	CATCTGCAGTACCACCAATAT, CCAACTGTAGATACAGGGCAA, CCACGAAGACATCTGGAACAT, CCCAGTGCACTTTGACAGATA, CGAATGTACCAACGGTTCCTT, CGTGCCTTATACTCACATATA	6	34646, 6608, 32998, 5531, 18401, 72268	0.164	1134	0.0856	1290	0	0	0	2
E4f1	CACCAGATCATCGTGCAGAAT, CCACTGTGACAATGGTGTCAT, CTGATACCCAAGAGTACATTA, GATACCCAAGAGTACATTATT, GCTATGTCACAAGACCTTCAA	5	7874, 16245, 23338, 5340, 73431	0.164	1135	0.079	1190	0	0	0	2
Klri2	CCTGGTTTAATGTGTTTGTAT, CGGAACACCCTAATGAATGAT, CTTCTTGATTCCAAGCTTATT, GAACAAACAAGCAGGAGATTA, GCTTCTTGATTCCAAGCTTAT	5	67355, 7658, 16660, 54323, 5988	0.164	1136	0.079	1191	0	0	0	2
Ifne	CACAGGAAGAATTTCCTGCTT, GAACCTTAGGTTACAGATTAA, GCAGAACCTTAGGTTACAGAT, GCTCTTGGTTTCTTCCACTAT	4	57989, 9925, 4197, 9959	0.1641	1137	0.064	958	0	0	1	3
Vmn1r212	CCTTCCATTCTTGTCATTCTT, CGCTCATTTACCTGTTCAATA, GATGGAGTTCTGACTGGATTT	3	10647, 70071, 7850	0.1642	1138	0.0498	752	0	0	0	1
Ctbs	CAGAGAGCAAACACAAGAAAT, GAACTTATGTGCTATGCTCAT, GACTACATCAAGATGGGCATT, GCCAACAAGAACTATGTGTAA	4	4274, 78744, 9909, 38773	0.1643	1139	0.0642	963	0	0	1	2
Hars	CCAACATTAAACGCTACCATA, CCCGAAGTTACTAAACCAGTT, CCTGTGTTTGAACTAAAGGAA, CGCATCCTAGATGGGATGTTT, GATGTCATCATCCGCTGTTTC, GCTGCTCTTTGAGTATCTAAT, GTACTTAAACAGTCTGCATAT, TGAATAAACTGACCAACATTA	8	56550, 53158, 18736, 7626, 65899, 56335, 3355, 5533	0.1643	1140	0.0931	1382	0	0	1	3
Mmp12	CAAGCTGATTTCCACACACTT, CCCATGAATGACAGTGAATTT, CCTCACTTACAGGATCTATAA, CTTACGAAATTGAAAGCAGAA, GAATGGTACTTGTCAAGATTT, GATAAACACTACTGGAGGTAT, GCAGCATTCCAATAATCCAAA, GCCACCAACATTACTTCTATT, GCTCACGGAGACTTCAACTAT	9	41404, 89808, 54409, 4582, 29723, 43352, 39226, 22643, 4347	0.1645	1141	0.1024	1520	0	0	2	2
Ubxn2b	CATCGGCTTTATTCAGGTGAT, CCAAGTAAAGAACTAACAGAT, CGTCTCGTACAGAGATTCAAT, GCAGCTGTTCTTATTGATGAT, GCGACTACTGACTTTATTCTT	5	54929, 3905, 9898, 8385, 40313	0.1646	1142	0.0792	1194	0	0	1	3
1700052N19Rik	CAAGTGTGTTGACACCCACAT, CTTACGATTAAGGACAGAACA, GATACATTGCATCGACATAAA, GCCATCTCTCTTCTTTCTAAA, GTTTGTAGAGTGCTACATGTA	5	26428, 8418, 62093, 26599, 3820	0.1647	1143	0.0793	1196	0	0	1	2
Gbx1	CCCAAGATTGTAGTGCCCATA, CCTCCCTCCTTATGAGCGAGA, TCCGCACTTCTCTGAGACTTT, TCTGAGACTTTCCCGAGTCTA, TGGGACCTAAACCGAAGCTAA	5	16263, 19509, 8592, 3305, 48961	0.1647	1144	0.0793	1195	0	0	1	2
Serpina7	CCAACATTTGATCTGTTCATT, CCACTCTCTATAAGATGCCAT, CCCTCTATGAAACTGAAGTCT, CCGATTGGATAGAGCATTCTT, GCTGTGCTACACATTGGTGAA	5	7843, 54457, 5576, 20275, 85764	0.1648	1145	0.0794	1197	0	0	0	2
Stap2	CCAGGGTTTAGCCATCTGTTT, CCCGTGGTCAAACACTACAAA, CCCTGAGCTGTATAGTGAGTT, GAAGACAAGTTGCCTCAACTA, GCCGAATACATGAATCAGGAT	5	4455, 65235, 65436, 8222, 91524	0.1649	1146	0.0796	1199	0	0	1	2
Sars	CCAGACTTACTTACTAAGCCT, CCATATGCTTAATGCTACAAT, CCCAGAGAACGTGCTGAATTT, GACAACAAAGTAGAACGTATT	4	46304, 43498, 6207, 9318	0.165	1147	0.065	974	0	0	0	2
Slc40a1	CAGACATGAATGCTACCATTA, CCTCCATGTATGAAGGTTATA, CCTGATCATCACTATTGCAAA, CGGTTGGAATTTGGTGTCCAT, GCAATGGGACATCTTATGTAT	5	3191, 35890, 8650, 73356, 64103	0.165	1148	0.0797	1200	0	0	1	2
Tmco7	CAAGTTCACTACAGAACACAA, CCTGAAGAAATCTTGGTTGAT, CGAATTACCATCTCCACTCAT, GAGTTTCACCTCTCAAACCTT	4	10472, 20362, 2761, 26940	0.1651	1149	0.0651	976	0	0	1	1
Pde4c	AGAGTGGTATCAGAGTAGGAT, GAGTTGTCTTACCTGTCGGAA, GCATGTGCTATACACGACGTA	3	7531, 10832, 31807	0.1651	1150	0.0505	762	0	0	0	1
Mylip	AGAGGACTTTAGCCCTATTAA, CCCTATTAACAGGATAGCTTA, CCGAAACACATGCATTCTATA, CCTTGGTAAGAAATACGTCTT, CGACATCAAGAGAACATCCAA, CTGGCACCTTACCGCCTTAAA, GCACATTAAAGAGTCCCTCTT, GCTGAATCTGAGAAACCGGAT, GGGATCATCGAGGTTGATTAT, TGCAGTATTGTAAACTATAAG	10	36671, 62138, 1296, 23340, 26397, 71039, 38238, 20143, 33431, 5259	0.1654	1151	0.1052	1564	0	0	1	2
Cdh8	CGTAAGGATATTAAACCAGAT, GCACTGAGCATTCTGTAATAT, GCATCCGAATATGAGGCATTT, GCTGGCACAATCTTTCAAATA	4	3553, 66056, 90960, 10230	0.1654	1152	0.0654	980	0	0	1	1
Brf2	GATAGTGAAATAGAGCAGTAT, GCACCTACATGCAGATGGTAA, GCGATGAGGATATTTCAGATA, GCTCGTGGAAGATTCGCATTA, GCTGTCTCGAACCTTGCTGTT	5	3281, 8647, 47216, 84477, 30146	0.1655	1153	0.0798	1201	0	0	1	2
Ube2g1	ACAGAGATTTGGCACCCAAAT, CGTTGGGAAGTCCTTATTATT, GCAAATGTAGATGCTGCGAAA, GCAGGTTTAATAGACGACAAT, GCCAGAAAGTTCTCAAATCAT, GGGAGGATAAATATGGTTATG, GGTGATGTTTGCATTTCTATT, TCTATGCTGGCAGATCCTAAT	8	5641, 84197, 63368, 3212, 30720, 81846, 41604, 75508	0.1658	1154	0.0947	1408	0	0	1	2
Il21	AGAAGGCCAAACTCAAGCCAT, CCCATTAACTAAGCAGACATT, CCCTGGAAACAATAAGACATT, GATCGCCTCCTGATTAGACTT, GCCATCAAACCCTGGAAACAA, TCCTGTGATTCGTATGAGAAA, TGATTAGACTTCGTCACCTTA	7	35296, 35109, 6217, 37298, 3810, 20045, 54551	0.1658	1155	0.0889	1332	0	0	1	2
Nckap5	CCGATGACAATGAGACCCTAA, CCGTATCAAAGAAAGCCACAT, CCTCTTGTGCAAGTCAAGCAT, CCTGGGTACTCTTTGCCATAT	4	10821, 1890, 85915, 56681	0.166	1156	0.0656	981	0	0	1	1
Lmod3	CCCACAGGAAACTTCAACCAT, CCCAGAATGGTGGTAACGAAT, GACACATCAGAGACCAAAGAA, GCCTACCTTAAACCTGTGCAA, GTTCACAGACAACACGTTCTT	5	8942, 24400, 2481, 89990, 59613	0.166	1157	0.08	1202	0	0	1	2
Adamts17	CGCTGCAAAGTAGTGACAGAA, GAGCATCTGATCAGACGCAAA, GCAGTGGTGGTTGATGATAAA, GCGTTCACAAAGATGAACCTT, GCTGTTATTTCATGACCAGAA	5	61350, 8130, 16956, 8264, 4931	0.1661	1158	0.08	1206	0	0	1	3
Hoga1	CCACTCCCTAAGCATTTATAT, CGCTTGGATTTCAGCAACAAT, GCACCCAAATATCATCGGCTT, GCAGAGGTAGACTATGGGAAA, GCGCTTGGATTTCAGCAACAA	5	8446, 3993, 41191, 42418, 16899	0.1661	1159	0.08	1203	0	0	1	2
2700060E02Rik	CCACTGATCAACTTGGATGTA, CCTGTTGCTTTAGAGAAACAT, CTGATCCAAAGACAGACCACA, GCAGTTGCTAAAGCAAATCAA, GCCTAGTGATGGGAACCATTA	5	31366, 8922, 82486, 39760, 2570	0.1661	1160	0.08	1204	0	0	1	2
Galntl6	ACCAGCATCATTATCCCATTT, CCATGCCAACTGTAAGCACAA, GCAGAAATCATTCTAGTCGAT, GCGGACCATACACAGTATAAT	4	9167, 30194, 20744, 6917	0.1663	1161	0.0657	985	0	0	0	2
Mylk2	CAACAGAACAGACACCTAAAG, CAGCTAGAAAGACTTGAGTTA, CCAATGAGAAACTGAAGGTGA, CCTACCTCATGACTACAGAAA, CGATGACACGGAGACCTTAAA, CGGAAATGTCAACAGTGAATT, GACAACAGACCTCGTCTTTAC, GATCCTCTTCATGCACAAGAT, GGTGGTGAACTACGACCAAAT	9	5366, 2201, 89276, 72046, 44875, 75847, 79706, 49018, 12664	0.1664	1162	0.1039	1537	0	0	1	2
Kcnj5	CACCAGTTCTCACCTTGGAAA, CTCGATTGTTAATGCCTTCAT, GACCACAAGAAGATTCCCAAA, GCAGACCAAAGAAGGAGAATT	4	1136, 76248, 43631, 11111	0.1665	1163	0.0657	983	0	0	1	1
Arhgdig	AGGAGTATGAATTTGTGACTT, CCGAGTCCTCTTGGCTGACAA, CCTATCATCATGGACCTTACA, GCTGGACGAAATTGTACCAGA	4	10343, 3463, 36353, 54450	0.1666	1164	0.0657	982	0	0	1	1
Nrap	CCAGCTTATCAGATAGCCAAA, CGAGAGAAACAAGCTGAACTA, GCCAGTGATTTCCGGTACAAA, GCTTTGAAGTTTACCAGTATT	4	3363, 88947, 56613, 10381	0.1667	1165	0.0657	984	0	0	1	1
Abcg4	CCCAAGTTGATGCAGTTGGTA, CCGCAAGATGTCCTGCTACAT, CCGCCTTAGTTGCCCAGTCTT, CCTGACCATCTATGGTATGGA, GCTTAGATGAACAGTGCCCAT	5	1257, 81875, 69939, 21712, 9399	0.1668	1166	0.0805	1211	0	0	1	2
Fxyd4	GCAAATGTAGGCGTACCCATA, GCAAGTGCAAATGTAGGCGTA, GCCAGTGACCCAGTTGATAAA, GCCCAGTTCCTTACCTGGAAA, TGATAAAGACAGTCCCTTCTA	5	85336, 30147, 43893, 8423, 4195	0.1669	1167	0.0806	1212	0	0	1	2
Epha5	AGTCTAAAGAGACCAGTATTA, CCTACAGATCAGTAGGTGAAT, CCTATATTGATCCGCACACTT, GCACTTTCATAACGGGCACAT, GCAGATTCATCACAGTTGTTA, GCCTTAACCTTTGAGTTTATA, GCTGGACAAACTGATACGAAA, TCTGTCCGTGTCTACTATAAA, TTGCCCATCCAAGCCTAATAT	9	31446, 86844, 5635, 54784, 27405, 15645, 32765, 1456, 37801	0.1669	1168	0.1042	1546	0	0	1	2
Orc3	CCATACTATTACCTGAAGAAT, CCTGCATGTTTACCATATCAA, CCTGGCACTTACTAGATATTT, GCCCTGAAGAAGACAAATTAT, GCTCGATTTATTCGAGCTGTT	5	2969, 28660, 66526, 8846, 60397	0.1671	1169	0.0806	1213	0	0	1	2
Ppp2r5a	AGATTCTTGGAGAGTCCTGAT, AGCTCAAAGATGCCACTTCAA, CAGCTCAAAGATGCCACTTCA, CCCAGCTCAAAGATGCCACTT, CCCTCTCAAGTTGTAGCAGTT, CCTCACATACAGTTGGTGTAT, CTCAAAGATGCCACTTCAAAT, GCACTGTACTTCTGGAATAAT, GCAGAGCATAAGCAGTTTCTA, GCCACTTCAAATGAACAGCAA, GCGAAAGAATTATGGACTAAA, GCTCAAAGATGCCACTTCAAA, GCTTACAACATGCACAGTATT	13	26983, 39477, 26466, 40694, 18604, 63906, 4138, 75264, 87864, 1170, 41975, 41493, 7054	0.1671	1170	0.1178	1757	0	0	2	3
Usp22	CGGCGGAAGATCACCACATAT, GACAACAAATACTCCCTGTTT, GACCTGATGTACGGAGGTATT, GCACTGCAAAGGTGATGACAA, GCTTGGAAGATGCAAGGTGTT	5	62773, 92181, 84195, 2878, 8886	0.1673	1171	0.0807	1215	0	0	1	2
Gas2	CCAACCCTGAAGGACATGAAT, CCGAGAAGTGTGTCTCTGTTT, CCTTGTGGTTAACCAATCTAT, CTCAAATGGTAGCACTATTTA, GCCATAATACTTAACTGGAAA, GCTGCCGATGAAAGAAGACTT	6	11207, 7194, 4335, 23305, 79690, 63692	0.1676	1172	0.0887	1330	0	0	1	2
Anpep	CCTGGTTAACTATGATGAGAA, CCTTTCTGTTATCCCTGTCAT, CGCTTGCCTAAGACTCTTATA, CGGTCTACTGTCTACTGCAAT, GCTCAGGAGAAGAATAGGAAT	5	45782, 8917, 19243, 2858, 37351	0.1677	1173	0.0811	1219	0	0	1	2
Fbxl14	GCACAAATGTATGGGAGAAAT, GCCAGAAACTCACGGATCTTT, GCCTGCCTTCACTTACACTTT	3	2107, 12847, 26350	0.1677	1174	0.052	790	0	0	1	1
Chka	AGGCCGACTGGAGCAGTTTAT, AGTGCTGACTTAGGATATTAA, CTCTCTTACAACCTGCCTCTT, GAATTTGGGTACATGGAATAT, GAGTTACGTTTACCAGATATT, GCCATTCAATAAGGAACCAAA, GGCGGAAGCTGATGCTTATTG, GTTACTTGACTACATTCCAAA	8	78756, 5579, 63361, 71122, 7852, 7770, 23951, 3642	0.1678	1175	0.0962	1428	0	0	1	4
Cabp7	CACTGACTTTGACACGGTCTT, CCTGGGTTACATGCCCAACGA, GAGGTTATCATCCAGCGGCTA, GCGGCTTCTCTATGACACCTT, GTCCATGAAGGACATAGAGAA	5	4638, 68102, 8334, 89375, 14593	0.1679	1176	0.0812	1220	0	0	1	2
Celf2	CAACAAGATGAACGGAGCTTT, CAGGTATTCAATGAGGGAGGT, CATAGGAATGGTTTCCAAGAA, CCAGAGTAAAGGTTGTTGTTT, CGAGAATGATATCAGAGTGAT, CGTTCCTGATAAGTGAATAAA, GCGGTAAGTTTCACTCTTTAT, GCTGCCCTCAAAGAGTATTTC	8	33923, 71683, 6046, 43612, 23414, 75429, 2261, 17326	0.1679	1177	0.0963	1429	0	0	1	2
Arid3c	CAGTGGCATCAGCAGTATCAA, CATGAAGTATTTGTACCCATA, GAACAGTTCAAGCAGCTGTAT, GAATCCAACCACATGAGTGGA, GCTCCGTACACAGTACATGAA	5	53138, 74558, 4376, 69576, 8436	0.1681	1178	0.0816	1223	0	0	1	2
Svs4	CAGTCGGAAGAAACTGTCAGA, CTAATATGGAAGGTGAGAGTT, GCTGAACATCTGGACCAATAT, GTAGTAGTAGTAGTAGAAGAA	4	27395, 68268, 1056, 11255	0.1682	1179	0.0672	1012	0	0	1	1
Pik3cg	CAAGATCAGAGGCATTGATAT, CCACAGTCCTATCCAACGAAA, CCCAAGTTATTTCACAGCTTA, CCTGCATTACTGGAAGTTGAT, CTCGTGTGTCCACCATGTATT, GCTGTTAATAGACCACCGTTT, TACGCATCATGGAGTCCATTT, TGCCACAACGATCGCTCAAAT	8	3200, 17674, 41645, 86640, 69270, 16773, 81552, 5748	0.1683	1180	0.0966	1432	0	0	1	2
Fhl2	CCTCACAGAGAGAGATGACAT, CGACTGCTATTCCAATGAATA, CGGCAAGAAGTACATTCTAAA, CTGTGACTTGTACGCTAAGAA, GATGGGAAGATGGTTTGGAAT, TATCACCACAGGAGGTGTTAC, TGGCACAACGACTGCTTTAAC, TTGAGGAACTCTATGCCAATA	8	1293, 30280, 19737, 29398, 76482, 36262, 6386, 59102	0.1684	1181	0.0966	1433	0	0	1	2
Ncam1	CCAAGCTCCAACTACAGCAAT, CCTCCAACCATCATCTGGAAA, CGTGCCCATTCTCAAGTACAA, CGTTGGAGAGTCCAAATTCTT, GATCTTTCTTCCAATACTATT	5	12998, 49995, 61008, 9490, 1266	0.1684	1182	0.0818	1225	0	0	1	2
Rgnef	CCACACCATTAGACTTAGCTT, CCTCTGATTGTGTGGCCATTT, CGGAACAAATCTAAGATGAAA, GCCAAGATTCAGCAATGTCAA, GCCTCCGTGTACCAAGAAATT	5	8410, 67604, 20037, 4508, 30052	0.1684	1183	0.0818	1227	0	0	1	2
Ddhd2	ATAGTTTAGGTTCGCTTATAT, ATTTGACCCTGTGGCATATAG, CACTACGGGTGGGAGTATAAG, CGAGGCGATGCATCAACATTA, TGCTGATCCCACACCATAAAG	5	58929, 3795, 64573, 70352, 8651	0.1685	1184	0.0818	1228	0	0	1	2
Glt25d2	CCAGAGTCTTACCCTGATGAA, CCCTGATGAAATCGGACCAAA, CCTGTGCAACAAGGAACACTA, GCCTGGCTTTAACTGTGTATT, GCGCATCTGAATTGCCTGAAT	5	49238, 68366, 8464, 88356, 4368	0.1685	1185	0.0818	1226	0	0	1	2
Slc29a1	CCTCGGACACTGATCAATCAT, GAGACCAAGTTGGATCTCATA, GATCTCTCAATCTGTTCGGAT, GCTGTGTTGTCCTTCTTGTTA	4	22725, 11488, 86462, 434	0.1686	1186	0.0676	1020	1	1	1	1
Ccdc124	GAAACAGAAGGAGCTGGAAGA, GAAGGAGCTGGAAGATGCTTA, GCCACTGGAAGAGAACCTTAA, GCTGATGCCAAGAAACAGAAG, GCTGGAAGATGCTTACTGGAA	5	35063, 7552, 7132, 13942, 92395	0.1687	1187	0.0821	1230	0	0	0	2
Slc7a11	CATTAGCAGTCCCGATCTTTG, CCAAGTGGTTCAGACGATTAT, CCCTGCATATTATCTCTTCAT, CCCTGGAGTTATACAGCTAAT, CCGGAAATCCTCTCTATGATT, CTCTTCATCCCGGCACTATTT, GCAAGCTAATATGCAAGTCAT, GCCCTGTCCTATGCAGAATTA, TGGAGTTATACAGCTAATTAA, TGGGTGGAACTGCTCGTAATA	10	34610, 52994, 5308, 84770, 77752, 92307, 58236, 1495, 85252, 63600	0.1687	1188	0.1093	1618	0	0	1	2
Epdr1	ATAAGGAGGGAGTGATGTTTC, CACCAAACAGTGTGCAAAGAT, CAGGAACTACACTGTGGTCAT, CGAAGTAATGATTCCTCTAAA, CGGTTCTTTGATGTGCAGCTA, GAAGAACAGCAAGATCCTATG, GCGTTTATACAGCCAAGGATT	7	68326, 35974, 57994, 5849, 72252, 5321, 76649	0.1688	1189	0.0916	1369	0	0	0	2
Spz1	CAGCCCTGCTAGAGAATGAAT, CCCACCACCAAAGAATAGCAT, CCCGGATGTTTGCTTTACTAA, CGCCAGAAGCAGATACAACTT, GCCAGAACGAAACCCAAGAAA	5	7727, 64097, 58046, 15992, 6632	0.1688	1190	0.0821	1232	0	0	0	2
Sall2	CCCACCGGTAATGGTGATAAT, CCCTTCCCTTATGTGCTAGAA, CGGAAGAAAGAAGAAACTATA, GCCACTCTTCACTTGTGTCTT, GCTCCCTACTTTCAACAAGTT	5	9194, 68175, 84522, 2241, 21953	0.1689	1191	0.0821	1231	0	0	1	2
Col27a1	CCAGAGCATTAAGACACCCTT, CCCTACTACTGGCTTATCTAA, CCTCTGTTCACATCGTGTGAA, GCCCTACTACTGGCTTATCTA, GCCGGTTATAATGGACACAAA	5	63957, 8230, 57895, 5180, 25808	0.1692	1192	0.0824	1235	0	0	0	2
Nudcd3	CCATCCGTGAGAACTACATCT, GAAGAAAGAACTAGAAGAGAA, GAAGCTCACTCACAAGATCAA, GCTGGTTCATTGTAGGCATTT	4	9810, 5595, 12244, 63021	0.1692	1193	0.068	1025	0	0	0	2
Lin28a	CAAAGGAGACAGGTGCTACAA, CACCTTTAAGAAGTCTGCCAA, CATCTGTAAGTGGTTCAACGT, CCAGCCCAAGAAGTGCCACTT, CCCAGTAAGAATGCAACTTAA	5	8185, 61245, 77677, 37723, 5351	0.1694	1194	0.0826	1238	0	0	0	2
Pdcd4	ACTTTCTAAGTGCCATGTTTA, AGACTCTAACACCAATTATAC, ATTTCCGCATCTACTATTAAT, CCTGTCAATCACCTTGTTAAA, CGAGCTTGTATATGAAGCCAT, GCGGAGATGTTAAGAGACTTA, GGAACTGGAAGTACCTCATTT, GGGTGAGTGAAGCTACTAAAC, TCTTACAGTCTTAGGTGTTAC	9	5088, 3365, 71570, 5651, 74328, 64224, 66455, 56615, 12623	0.1694	1195	0.1059	1575	0	0	1	3
Aadat	CCCTAAGACCTTGATACAGAA, CCGGTTTGAAGACGACTTGAT, CCTAAGACCTTGATACAGAAT, GCAACTGACAAAGCATTAAAT, GCTCATATTGACAGAACTATT	5	27546, 33461, 9370, 34287, 1798	0.1694	1196	0.0826	1240	0	0	1	2
Ociad1	CCCATCATTGGACCTACTGAA, CGATAACTGATAGTGCATGTT, CTTCCTCGTTATGAGCCAATT, GAGAGTCCTATGGAGTAACTT, GCTGCCACAAGTATGCTGATT	5	2246, 48003, 40122, 9221, 86928	0.1694	1197	0.0826	1237	0	0	1	2
Sar1a	ACTTCAGAAGAACTGACAATT, CCAGTTCCTAGGACTCTACAA, CCGTGAAATATTTGGGCTGTA, GCCAATTCTTATCTTGGGAAA, GCTCTTTGTGAAAGTGGTTTA	5	9605, 1094, 25827, 11864, 55524	0.1694	1198	0.0826	1239	0	0	1	2
Fam13c	CGAAGTTCTGAAATGGATGAA, GACGATGGGAAGGGAACTAAG, GAGTCCACAAAGCAGCATCTT, GCATCTTTCTTAATGTTCCAA, GCGAGAATTTGAAGAACAATT, GCTACCTGCTAGCGAAGATTT, GCTGTAACTGAGTGTGACGAA, GCTGTTTATGAATCAGAGTAA, TAGACCAGAGGGCTACCATTT	9	52041, 3593, 35958, 37148, 14347, 26111, 86417, 85113, 5014	0.1694	1199	0.1059	1577	0	0	1	2
Hcn1	CCTCCAATCAACTATCCTCAA, GCACTTCGTATCGTGAGGTTT, GCGCCAGAAGATACATGATTA, GCTGGGTTTCTCTGAATGAAA, GTGGCCTACATGCAAATGTAA	5	9949, 86671, 36637, 92, 77337	0.1696	1200	0.0827	1241	1	1	1	2
Olfr1440	CATTGGCACAATCCTGAATAT, CTCATCATCTTGATTAGGATT, CTGTCATTGTTATCCTGATAT, CTTCCAGAAGTCTAAATCTAT, GAAGTCTAAATCTATCTCCTT	5	435, 15280, 9837, 49468, 49976	0.1696	1201	0.0828	1243	1	1	1	2
Efcab8	CACAACAGTGAAATCAACCAA, CACCAGCCACAACAGTGAAAT, CTTTGTCACTTGGCAGAAGTA, GCTGACCTACAGAAGGTGTTT	4	34897, 29268, 10122, 4740	0.1696	1202	0.0682	1027	0	0	1	1
Apex2	CCTGCCTATGAAGGCTTCTTT, CCTGGCTATTGTTGAGGGTTA, CCTTCTGTAAGGACAGTGCTA, GCCACCCTGAATGGAGATATT, GCGATGCAAGTAGTCTGGAAT	5	67360, 63378, 26750, 7914, 6211	0.1696	1203	0.0829	1244	0	0	0	2
C130073F10Rik	GAAGAGTAGTCTGTGCTCTTA, GCAGAGGAAACCAATAACTGT, GCCTTCACTAAGAGACGACAT, GTGTTTACAATGGAGTAGATT	4	17371, 361, 37887, 11588	0.1697	1204	0.0682	1028	1	1	1	1
Zfp192	CAGACTTTGGAAAGGATTGAA, CATTAGAGAAACCATGTACTA, CCTCCAAGTATTCACGTACAA, CCTGAAGAGGATCTTGTCATT, GACGACATAAATGTGATGAAT	5	86125, 376, 9863, 38112, 88325	0.1697	1205	0.0829	1245	1	1	1	2
Ppa1	CAACGACCCAATCGATGTTTG, CAGTACATTTCTCCATTTCAT, CCACGATTATTGGAAAGCATT, CCTGGAAGCATTAGATGCAAA, CGCAGCCAATTATAAAGATAT, CTCTGGAACACGAGCTGTTAC, GATTGGTTTAGAAGGTATAAG, GCGAATCTGTTCCCTTATAAA	8	80146, 537, 47051, 73196, 45841, 34650, 6695, 34527	0.1698	1206	0.0978	1451	0	1	1	2
Harbi1	CCCAAAGATAGCTGGCTTCTT, GAAAGGGTCTGCATTCTCTAA, GCGGTCTTCTTTAACCAGTCA	3	1652, 20971, 13168	0.1698	1207	0.0537	813	0	0	1	1
Mink1	CCATCGCAATATTGCCACCTA, CCCAGGCTCAAGTCAAAGAAA, CGACCTGGTAAAGAACACAAA, CGGATTAAGTTCCTGGTCATT, GCTTGCTGATAGCAATGGCTA	5	11118, 86487, 8734, 3783, 20486	0.1698	1208	0.0831	1246	0	0	1	2
Fndc3a	CCCACAGGTTATCGAAGACAA, CCTGCCATTGTGACTTGTCTT, CCTTCAGTTAAAGGGAAGATA, CGGAAAGCTTTACGACCTTAA, GCCGTCAGAATTTCTAATCAA, GCGACATGGCAACGCAGTATA	6	7183, 74758, 4711, 69479, 33683, 90784	0.1698	1209	0.0911	1366	0	0	1	2
Thumpd1	CATTAAGGCTTCTACAGAGAA, GACAAGGGTTATTCTACGAAT, GACGCTAAACCTGAACCTGAA, GCCACATATCCTAGTACCAAA	4	21787, 82924, 11578, 475	0.1701	1210	0.0684	1031	1	1	1	1
Kcnt1	CCACTGCAATTTGAAGAGCTT, GCACGAAGTATAACTACACTT, GCATAGCATCATCGCCTCTAT, GCTGACTTCATTCTTGTTTAT, GCTGGTCAAGAACCGAATGAA	5	68374, 5311, 47941, 8241, 27240	0.1701	1211	0.0836	1256	0	0	0	2
6030446N20Rik	CCAGCAGTACTTAAACTATAT, CCATTGAACATGGGTAGATTA, CCGTCTTATATGCTGAACCAT, GTCGATGTTGCTGTTTGATAT	4	2351, 10960, 31570, 85761	0.1702	1212	0.0685	1033	0	0	1	1
Ranbp9	ACGAAGAATGGACATAGTTTA, CCAATCATATTGCCATAGTAA, CCGGAGCTAAACAGTCTCAAT, GATGTAGACATGGAAACAGAT, GCACTACAAAGGTCATGGTAA, TCACACTCACATTGTGGCAAA, TCACCGACTTACCGCCAAATT	7	6980, 17315, 69673, 2118, 86245, 32128, 60376	0.1702	1213	0.0932	1383	0	0	1	2
Tmem106b	CCACAGTTATTGCAGAGGAAA, CCTATTATTCATGGAGAACTT, CGTGATTGGAAAGGCTCGTTT, CGTTACATCGACAGACAATAT, CTTGATATGAAGCAGATTGAT	5	37408, 63254, 43833, 8062, 5875	0.1703	1214	0.0838	1257	0	0	0	2
Dhx8	CAGTGCTCTCTTCAACAGACA, CTCAAGGCCATGGGTATTAAT, GCAGATCAGAAGAAAGCCAAA, GTTAGGCATAATGGACAGGCA	4	35401, 7120, 9392, 53817	0.1705	1215	0.0686	1035	0	0	0	2
Mad2l1	CCAGGATATAAAGAAGCGTTT, GACCGCAATTTATTACCAATT, GCAGAAATATGGACTCACCTT, GCTCAGTGATTAGACAGATTA, GTGGCATTTATCCGTCGGAAA	5	9687, 1051, 38495, 60973, 82453	0.1705	1216	0.0839	1258	0	0	1	2
Psmg3	CATGGCTGTGAAAGACAAGAG, GCAAAGAACCTGGTAGCATTT, GCAATGTGGCCAATGACATCA, GCATTTGTGTCGCAAGAAGCA, GTAGCATTTGTGTCGCAAGAA	5	64434, 9870, 16010, 506, 31318	0.1706	1217	0.084	1260	0	1	1	2
Olfr348	CCCTCATCAAATGACACTAAT, CTAGTCATTGAATCCTGGTTT, CTGGTTTCATATGGACGCATT, GAGTCAGAGTATCTGTATCTT, GCTACATACCTGACCACAGTA	5	52975, 45040, 50839, 9892, 442	0.1706	1218	0.084	1261	1	1	1	2
Myog	CCCACAATCTGCACTCCCTTA, CCCAGACGAAACCATGCCCAA, CGCAGCGCCATCCAGTACATT, GCACATCTGTTCTAGTCTCTT, GCCCACAATCTGCACTCCCTT	5	22558, 21102, 20017, 315, 9937	0.1706	1219	0.084	1259	1	1	1	2
Glmn	AGTTGAACATGGAGCATATTG, CCCTTTGCTGACAGCACAATT, CCGTTGGACTAGCATTGTCAA, CGCTCTCTTCACATTTGACTT, GCACATTATGAAGCAGAAATT, GCCACTTCATATAGGACTTAA, GCCTTGATAGAGTTCACGAAA	7	17308, 59650, 6509, 11186, 51129, 3584, 55985	0.1706	1220	0.0935	1394	0	0	1	2
Cd24a	ACCCACGCAGATTTACTGCAA, CAAATCCAAGTAACGCTACCA, CCAAACATCTGTTGCACCGTT, CCCGTACAGTAGTCTTGATAA, CGCAGATTTACTGCAACCAAA, CTCTTCTACATCTCTACTGTT, GTAACCAGAATATTTCTGCTT	7	86877, 21677, 62600, 1889, 92280, 7079, 82868	0.1707	1221	0.0935	1395	0	0	1	2
1190002H23Rik	CCTTCAGTGATGAGAAGCTGA, CGAAGACTTCATTGCCGATCT, CTCGAAGACTTCATTGCCGAT, GCCAAATTAGGTGACACTAAA	4	9657, 48492, 77771, 6391	0.1708	1222	0.0687	1039	0	0	0	2
Bpifb6	CCAGACCTTCTGGCTATCAAT, CCTCAGCAATATGAAGGTAAA, GCCTGTTATCACATTGAACTT, GTCACCTCTATGGACAGTTTA, TCACCTCTATGGACAGTTTAT	5	20412, 14588, 5003, 8403, 60385	0.1711	1223	0.0842	1265	0	0	0	2
Rasal1	CCCAGTCTTGTACTGACCAAA, CCCTCAACCATTGTTCGAGAA, CCTCCAGTGTAAGAACGTGAA, CCTTTCCTAGAGCTGAGGATT, GCAACCATAGTTTGGAAACTT	5	1555, 52635, 9555, 59465, 50506	0.1712	1224	0.0842	1266	0	0	1	2
Ubc	AGACGTACCTTCCTCACCACA, AGGTCAAACAGGAAGACAGAC, CACTTAGTCCTTCGCCTCAGA, CCATAGAGAATGTCAAGGCAA, CCATTGAGAATGTCAAGGCAA, CCTGTCAGACTACAACATCCA, TCAGACTACAACATCCAGAAA, TGACACCATAGAGAATGTCAA, TTACCACCAAGAAGGTCAAAC	9	57571, 5603, 40809, 70313, 12982, 88131, 24097, 2034, 82816	0.1713	1225	0.1078	1601	0	0	1	2
Gnl3	GCAGTGTCATTAATAGCTTAA, GCCCTCATTTAACTAATAGAA, GCCTAATTATCTCACCTTGTA, GCCTCAGACATTGTGTTAGAA, GCTCCCTTTAAAGAGGCTCTT	5	9692, 59856, 27835, 12711, 1177	0.1713	1226	0.0842	1264	0	0	1	2
Gtf2e1	ACTGACCTAGAAGCCAATCAA, CCTCATCATCATCGCGATGAA, CCTTGTATAAAGTGATGACAT, CGTATGTTTGAGGATCTCTTT, GAAGCCAATCAACTGTTTGAT	5	82875, 9160, 52138, 2779, 63972	0.1714	1227	0.0843	1267	0	0	1	2
Ctbp1	CCATACGAGTGACCAGTTGTA, CGGGTTTGACAATATCGACAT, CGTCCTCTTCTATGATCCATA, GCTAATTCTATCACGAATGTT, GCTCTTAGAATCATCGTCCGA	5	17745, 66106, 3418, 8948, 46692	0.1714	1228	0.0843	1268	0	0	1	2
Fam58b	ACCTTACCAAGCCAATCATTG, ACGTGTCGCACAGGTACTTTA, GCACCATTTACCATAAGTTCT, TCCATGTGGGCAGGACATATA, TTCCGAGTAACCCGGTTTATC	5	1406, 81334, 32837, 9624, 75142	0.1715	1229	0.0843	1269	0	0	1	2
Nedd4l	AGCTCGCCAACAGTAACTTTA, CCAGAGAGTTTAAGCAGAAAT, CCTCGCCAAGAAGGACATATT, CGCATCCGGTTACTACAGTTT, CGGAGGCACATTAGTGAAGAT, GACAATTTAGGCCGAACTTAC, GCAGGCAAAGCCCTTAATAAA, GCTCGCCAACAGTAACTTTAT, TGCCTTCTTGGAGGGATTTAC	9	48889, 82753, 6169, 16230, 65304, 380, 36619, 60888, 13518	0.1717	1230	0.1084	1609	1	1	1	2
Mif	CATCAACTATTACGACATGAA, CCAGAACCGCAACTACAGTAA, CCGGGTCTACATCAACTATTA, CGCACAGTACATCGCAGTGCA, CGCTGCCAACGTGGGCTGGAA, GACCGGGTCTACATCAACTAT, GCAACTACAGTAAGCTGCTGT, GCACCGCTGTTCTTTGAGCCT, TGGTGCCCAGAACCGCAACTA	9	37672, 9731, 69163, 5933, 83690, 12330, 1095, 59341, 22427	0.1718	1231	0.1084	1610	0	0	1	3
Prkg2	ACGTCAGATCAGCCAATATAA, ATGTCGCATGCCTCGTGATAG, CCAATATAATTGCGGAAGAAA, CCCGAGGTCATTCTTAACAAA, CCGAACCTATGACCTCAACAA, CGTGAAGTTGTATCGTACTTT, GAACGGGATCAACGACATTAA, GCCTCGTGATAGATCGAGAAA	8	6273, 30980, 81751, 48657, 2050, 37583, 62341, 47226	0.1718	1232	0.0999	1480	0	0	1	2
Rfx2	CAACTCAAAGTACCATTACTA, CATCACCAGCAGTACATAGAT, CGCATCCTTTGGCAAACTCAT, GAAGCTCATCTCTCTGTGTAA, GCAACTAAGATGGTCACTCAA	5	46938, 83323, 1321, 9694, 40598	0.1722	1233	0.085	1282	0	0	1	2
Deptor	CGCAAGGAAGACATTCACGAT, CGCTGTTTGAATGTGGAAGAA, GCAAGGAAGACATTCACGATT, GCATGGCTGAAGTCCTAGTTA, GTCGGAAATCTACCAGCTTTA, GTTTAGAGTTCTCAATCATTG, TGACCGAGAGACGGCGATAAA	7	5551, 5932, 55426, 54901, 41852, 17613, 66053	0.1724	1234	0.0949	1411	0	0	0	2
Ccdc32	CGATTCCTCCAGGAGAAGTTA, CGTTCCAAATTAGACTTGTAA, GAGAAGTTAGCATCAGAGTTT, GAGCACCTTGGAACATTTCAA, GCTTCTGCTTGTAGGAACTTT	5	9979, 28690, 28821, 517, 76459	0.1725	1235	0.0852	1285	0	1	1	2
Plcz1	CCAAGATATGAATCATCCATT, CCAGTTCTTTGCATGAACAAA, CCCTCGACATTGAGTGGAATA, CCTTATCTGATCTTGTCATTT, GCAATAAACAAGTATGCCTTT	5	35065, 6028, 54825, 8152, 66878	0.1726	1236	0.0852	1283	0	0	0	2
Dppa4	ACTGTAAAGACTTGGCTTATA, AGGGCTTTCCCAGAACAAATG, CGGAGACAGATAATGGTTGTA, GAATTGCAGATGTCTAGTCAA, GCAGCAAAGGCCAGAAATTAG, TGCTTATAAACGACTCCTTGC, TTCGTCCTCATCAGAAGTCAA	7	3086, 54634, 20964, 76906, 51754, 6771, 22757	0.1728	1237	0.0955	1417	0	0	1	2
Eras	CGGAGGCTACATTCTAAATGT, GACTCACCAATGCTTCGTGAA, GCTTGGGCACAGTGCAAAGAT, GTCTCATGTCAAGGTGACAAT, TGTGGCCGAATCAAGCAAGAA	5	7868, 51018, 68072, 6916, 72845	0.1729	1238	0.0853	1287	0	0	0	2
Npy6r	CCAGAGTAGCTCATGCCTATT, CCCTCTGGGTTTCATTCTTAT, GCCACTTGATTGCTATGGTTT, GCCAGACTTAAACACATAATA, GTGATCCTAATCATGGGCATT	5	8874, 37145, 3928, 27299, 88764	0.173	1239	0.0855	1289	0	0	1	2
Olfr1436	CAATGGGACTGAGTGAATCTT, GAAGCTACACAGCTGGATTTA, GCTGGATTTATAGGTTCTGTA	3	5977, 11997, 47566	0.1731	1240	0.0555	838	0	0	0	1
Pcdhga5	CCAGATGTACTGACTGACTTA, CCCAGATGTACTGACTGACTT, CCGTTCTTGATGCAAACGATA, CGCAAAGTTGACCTTCTCTTT	4	10889, 60630, 3179, 40066	0.1732	1241	0.071	1064	0	0	1	1
Ppp1r1b	AGATGGAAACTCTGAGGACCA, CATTAGCAACTTGAGTGAGAA, CCCAAAGTCGAAGAGACCCAA, CCTCCTTTGTACCCTGTCTTT, TGGAAGGCAGAGCAACACTAA	5	49567, 50046, 8350, 35006, 5532	0.1732	1242	0.0855	1288	0	0	0	2
Wdr91	CAAGAGGCATTGACTGTATTT, CCAGACAAACCGAAATGACAA, GAGACTAGAACCGTGGCTATA, GCTCAGAGTTCAGCCAAGAAA	4	13704, 1084, 63167, 11593	0.1733	1243	0.071	1063	0	0	1	1
Ccdc137	AGAAGTCTGAGCGCAAGAAAG, GAACCAGGATGAGCAAGAAAT, GAGATGCTCCTGGCAAGAAAT, GGAGCCTGTCCACCATTATAT, TTTCGGCTCCGAGAAATTATG	5	9400, 41696, 2413, 65725, 36592	0.1734	1244	0.0858	1293	0	0	1	2
Vmn1r38	CAACTCCGCTTTGTTGGCAAA, CAGCATTAACAGGATCTTCTA	2	12245, 12791	0.1734	1245	0.0262	390	0	0	0	0
Bsn	CCCACCAATTACGAGGTGATT, CCTAACGCTTTCCTCTGACAT, CCTTTGGTTATCAACCTCAAT, GCCAGAGAACAACTTCTCCAA	4	18206, 58515, 2680, 11072	0.1734	1246	0.0711	1065	0	0	1	1
6330407J23Rik	AGATGTTCCAGCCCATCATTC, ATGGACAAAGTCTCATAATTA, GCACGCATCTACGTGGCTAAT, GTGCCAGCTACAGTTCGTTAA	4	55942, 9570, 7244, 19433	0.1737	1247	0.0714	1069	0	0	0	2
Asf1a	ACCGAGGTCAAGAATTTATTA, ATACACTGAAACAGAATTAAG, CAAATCTACAGTCCCTTCTTT, CCAAATCTACAGTCCCTTCTT, CCGAACTTACAAGGGTAATTT, CCTACCGAGGTCAAGAATTTA, CTAAGCTTCAAAGGAATATTT, CTACCGAGGTCAAGAATTTAT, GCATTACCGTCAGCGTCAAAG, TGAGCAAATTGTGGATTATAA	10	71068, 2364, 50903, 92207, 11996, 19921, 5191, 63667, 88997, 16448	0.1737	1248	0.1154	1721	0	0	1	2
Mrgpra8	CAGATTATTCGTGACCATCAT, CCCAACATTATCTTGGACCAT, GATCGTTTCATTGTACTAGAT, GATCTCTATTCTCAATGGATA	4	2497, 15776, 29970, 11161	0.1738	1249	0.0715	1070	0	0	1	1
Myl10	CAGGAATCTGTGCTACGTCAT, CTGCACGCCTTCAAAGTGTTT, GAGGAGGTCAAGCAGATGTTT, GCCAGATGTCTGTGGCAACTT	4	30349, 14906, 691, 11767	0.1739	1250	0.0716	1074	0	1	1	1
Atat1	GAGACATTAAGCCATACTCTT, GCAGCAGCAAATCATGACTAT, GTGAACAACTTTGTCATCTTT, GTTCCTGAATAAGCACTACAA	4	82, 92116, 11972, 19462	0.1739	1251	0.0716	1072	1	1	1	1
Exoc3l	CACAGATCCATCCGGTTTCTA, CAGCGTAACTATTCCCTGGAA, CCAACCTGATTAGTGACTCAT, CCAGGCCCATCACTTACTAAA, GATAGACTCTGAGCGACTCTT	5	9923, 20681, 55459, 77531, 943	0.1739	1252	0.0862	1296	0	1	1	2
Kalrn	CATTTGGACATAAAGCCCGAA, CCACATCCTACATCCTGATTT, CCAGGGATTTCATCAACGTAA, CCCTTCTTAGATGAGAGCAAA, CCGTTTCTCTATTGTAAAGAA, GCACCGGAAACTGCACTATTT, GCATCCACATCTGCTACAGTT, GCCACCATTTCTTGGAAGGAA, GTTCTGACATATGTCATGCTT, TCGAGTGAAGCTCATCGACTT	10	58978, 30685, 22093, 5389, 53467, 46298, 57433, 62307, 12040, 1792	0.174	1253	0.1155	1722	0	0	1	2
Scamp5	CCAGTCAACTTCCTGTCCTAT, CCCAACTACACGTACTCCAAT, GCCATGTTTCTACCAAGACTT, GCCCATTTACAAGGCCTTCAA, GCGGCTGGATTGCCACCATTT, GGTGATGAGCCTAAGCTATTT, TGCTCTTAGCATGGTTCATAA	7	36833, 39820, 7057, 34683, 63412, 50608, 2392	0.174	1254	0.0968	1434	0	0	1	2
Zbtb24	CAAAGGAAGAAGGGCTTTCTT, CCAGTGCATGTCATCACACTT, CCATAGAGTATGGTCTTGTTT, CCATCATCTTACAGATCCTTA, GAAGCCATTTACTTGTGAAAT	5	49899, 54039, 20170, 9770, 1409	0.174	1255	0.0863	1297	0	0	1	2
Ube2l3	CCACCAAGACTGACCAAGTAA, CCACCCAAGATCACATTTAAA, CCAGCAGAGTATCCATTCAAA, GCTGAAGAGTTTACAAAGAAA	4	1686, 25604, 11447, 22729	0.174	1256	0.0717	1075	0	0	1	1
Vmn2r-ps159	GCAGCTGATACACCAGTTGAA, GCTGTTGGAGTGAACCAAGTT, GTGATGATAATGACGGAGATT, TGGAGGATAAAGAATAGTGAT	4	9585, 59877, 7291, 76987	0.1741	1257	0.0718	1078	0	0	0	2
Tgfbr1	CCCATAGAGATTTGAAATCAA, GCACTTATGCTGATGGTCTAT, GCAGAGATTTATCAGACTGTA, GCCTTGAGAGTGATGGCTAAA, GCTGACAGCTTTGCGAATTAA	5	83706, 36772, 1403, 9783, 60089	0.1742	1258	0.0863	1300	0	0	1	2
Nab1	ACTCTGCATTCACCTTGGAAA, CCATCATAGATTAAGCCTTAA, GCAATAGTTATGAAAGGAGTA, GCTTTCTTACTTTGATGCCTT, GTGGTGAAAGAGATGAATTAT	5	8373, 5640, 89320, 14646, 10672	0.1742	1259	0.0863	1299	0	0	0	2
Cald1	AGGAGTTTGATCCGACCATAA, CGTCCGCAATATCAAGAGCAT, GAAAGGATTTACAGAAGTGAA, GCAGCAGTAGTCTCCAAGATT, GCCGCATTAACGAATGGCTAA, GCCTGTTTCTAAAGAAACCAT, GGAAGAGAAGAGGAGGTTAAA	7	15842, 56192, 7811, 176, 23245, 85974, 42194	0.1743	1260	0.0972	1439	1	1	1	2
Chst5	CCAGACTTGGATCCACAATAT, CCTATGCGACATGGACGTATT, CTATGCGACATGGACGTATTT, GCGCTTCTTTAACCTACAGGT, GCTATAACATTAGGGTCTATT	5	32663, 53740, 9075, 3569, 89098	0.1744	1261	0.0864	1301	0	0	1	2
Dcun1d5	ATTGATACTGCGAAGTCTATG, CAAGAAAGAAGTGCCTGGCTT, CCTGTTCTTCTTGATGAATTT, CGTGAAGACAATGCAAACCTT, CTCAGCTGAATGACATCTCAT, GATACTGCGAAGTCTATGTTA, GCAATCAAAGTATCGTGTTAT, GTTAAAGGGAATGACCTCATT, TACCAAGGAAGAATGGTTAAA	9	91644, 5269, 22193, 43080, 87138, 28649, 91066, 7527, 3387	0.1745	1262	0.112	1660	0	0	1	3
Mybbp1a	CCAAGCGTAACAGCTCACTTA, CCCAATGATTCGGAGATGAAA, CCGGAGTGTATTTGGTCATAT, CCTGATGAAGTCCGTGCAATT, CCTGCCCTAGAGACTCCTATT	5	2960, 70015, 90033, 27964, 9295	0.1747	1263	0.0865	1306	0	0	1	2
Mrpl27	AGGCAAACACTACGGCATCAA, CCGCTACACGAAAGATGTCTA, CCTGAGGGAACCTTCAAACTA, GCACTCAGCGTCAGTTTAGAT	4	10013, 67011, 70183, 6145	0.1748	1264	0.072	1082	0	0	0	1
4933400A11Rik	GCAGCTGGTTAATAATGACAA, GCTAGGGCTTACAGATGGAAA, GCTCAAGTCTCACGTTCATTA, GCTTCCAATTACCTACCACAA, TGCTCAAGTCTCACGTTCATT	5	7288, 57273, 81109, 61719, 7862	0.1749	1265	0.0865	1305	0	0	0	2
Oas1d	ACTTTCTTTACGAACCATGAT, CCTCCTCTTCTGTAAGACCTT, CGCCAGCATGAGTTGGAATTT, CTGGATAGATTCGACTTTCTT, GCCCTTTGACTCCAGTAACTA	5	8668, 64721, 4881, 77543, 67883	0.1749	1266	0.0865	1304	0	0	1	2
Krtap9-1	CCAGGTGCTGTATCTCCAGCT, GCTGGAGACCAAGCTGTGTGA, GCTGTCAGTCTAGCTGCTGCA	3	33774, 11103, 9114	0.175	1267	0.0561	848	0	0	0	1
Hist1h4d	CCGCAAAGTTCTGCGCGACAA, GCTAAGCGCCACCGCAAAGTT, TCTTGGTAAGGGTGGTGCTAA	3	9358, 11022, 55736	0.175	1268	0.0561	847	0	0	0	1
Fam126b	CCCAGGAATGATTGATATTAT, CCGGTTTGAAGTCCTAAGTTT, GCATCATCTTACCAATCTCTT, GCCAGTGCTTCCTCAAGTAAA	4	61919, 9619, 32965, 7375	0.175	1269	0.0722	1087	0	0	0	2
Actr6	CCAAGCAGTATTAAGAGTAAA, CCGTGGTTCATTACTTAGTTA, CGCACATTGTTCCTTACTGTA, GCCATTGTCTATTCAATCCAA, GCCTGACTTCAGCACAATTAA	5	82008, 36317, 57342, 7738, 7728	0.1752	1270	0.0865	1303	0	0	0	2
Ankrd61	AGACTACTTTACCGCACTTAT, CCAGACTACTTTACCGCACTT, CCTAAGGGAAACCCTAGTAAA, CGCAAGCCACAAAGTTTGCTT, GCCCAGGTCAATGCTACTAAT	5	22551, 9185, 3408, 81732, 53091	0.1754	1271	0.0867	1308	0	0	1	2
Elovl6	ACTGGATGCAGCATGACAACG, ATGTACTCTTACTACGCCTTG, CATTAACTACCTGGTCTTCAA, CCATCCAATGGATGCAGGAAA, CCCATGTAGATCAAGTCATAA, CCCGGAAGTTTGCCATGTTCA, GCTGTCTTTATGAGACCGATT	7	38105, 36422, 6697, 46724, 3668, 65795, 73960	0.1754	1272	0.0984	1463	0	0	1	2
5730508B09Rik	CACCAGACATTTGATAGCCAT, CAGACATTTGATAGCCATGTA, CAGGATATTGAAGAACCACAA, GCCATGTATGTAACTGATATA, GTCATTATTTATGTACAGCAG	5	27013, 9038, 3888, 75699, 69562	0.1756	1273	0.0869	1311	0	0	1	2
Rab4b	AGACTGTGAAACTACAGATTT, CATACAACTCACTCGCTGCTT, CATTCAGTATGGCGACATATC, CCACCAGTTTATTGAGAATAA, GCAGTGCTGGAACTGGCAAAT, GCATTCAGTATGGCGACATAT, TCCACCAGTTTATTGAGAATA	7	1182, 22170, 67983, 7537, 39308, 89387, 15846	0.1757	1274	0.0986	1464	0	0	1	2
Amelx	ACAGACAAGACCAAGCGGGAA, AGCATGATAAGGCAGCCGTAT, CCCAACACCATCAGCCAAACA, GCCCTGGTTATATCAACTTAA, GCCGTATCCTTCCTATGGTTA	5	2892, 45011, 16420, 9376, 13933	0.1757	1275	0.0869	1312	0	0	1	2
Ptprh	GATGGACTTGATCCTGGGTTT, GCAAGCTTAGTTTATGAGAAT, GCATCTTCAACTCTTCCATAT, GCCAAAGACTTTGCTGACCAT, GCCAGTCTCAAATAACGGCAT	5	2130, 19152, 74957, 30902, 9630	0.1757	1276	0.0869	1313	0	0	1	2
Cd207	CCTACGTCCAAACAACTGAAT, GCAAAGTAGGAGGTTCTGGAT, GCCAATGATCAGCTCCAGATA, GCTCAAACAACAGAGTGACAT, GCTGAGGTTCAGATGCAGATA	5	81439, 42857, 8438, 5713, 78553	0.1757	1277	0.087	1314	0	0	0	2
Naf1	ATATGCATAACTTTCCACTTC, ATGAGAATTGGAATGCTTATA, CTCAGTTGTAAGCTCATATAT, TGGTGAAGTGCATGAGAATTG, TTATAGCTCTTCAGAACATTC	5	3089, 60919, 9314, 64460, 64259	0.1757	1278	0.087	1315	0	0	1	2
Abcb1a	AGTGTAGGAAACGTCTCTAAA, CCCACTTATGATGCTGATCTT, GACCACGTACGCCTACTATTA, GCACACATTAACCAACGACTA, GCCATAATAAATGGAGGCTTA, GCCGAATATGTTGGAAGGAAA, GTATATTCTGTGCCATAATAA, TCTGTTAGTATTCTCAGCTAT, TGAAACTGAGCATTCATATTT, TGGACTGTCAGCTGGTATTTG	10	12760, 8525, 26648, 42221, 65900, 4285, 4621, 11949, 48082, 8124	0.1758	1279	0.1175	1750	0	0	2	4
Csnk1a1	CCACCAATATGACTACACATT, CGAATTTATCGTCGGTGGAAA, GCAGAATTTGCCATGTACTTA, GCGTCACTGTAATAAGTTATT, GCTGTACGAGAGCAAACTGTA	5	44597, 8865, 4449, 87027, 21533	0.1758	1280	0.0874	1318	0	0	1	2
Olfr243	CAGTACTTGCATCTTACCAAA, CCACTGTTGTTTCCCATTCAT, GATTCACACATTCCAATGTAT, GCCTTCAGTATTCTTGGACTA	4	25377, 11296, 16813, 2528	0.1759	1281	0.0729	1093	0	0	1	1
Adam1a	AGCTAAGCTAACACCTCACAT, CCGCTAACTTCAGATATGAAA, CCTCTCATGGATCATTGCTAT, CTGAAGTACAAGAAGTAGTAT, GCACACAGTGTGATAGGATTT	5	1733, 84595, 59745, 59990, 9781	0.176	1282	0.0876	1321	0	0	1	2
Mpp5	AGACTCTGTACGACAAGTAAT, CCACCTTCACAAGAGAGACTT, CCGTTTCCTCTTATCGCCAAT, GCTGGCAAGTTCATTGAACAT, GCTGGGAGAGATTACCACTTT, GCTGTGAACATATTAGACGTT, GGAATCAGACAGCGGAATAAA, TCAGATTTGAAACCATATATC, TGGAATAGATAACCCTATATT	9	5899, 9973, 51927, 7336, 1683, 45043, 39368, 25323, 27265	0.1762	1283	0.1145	1706	0	0	1	4
Nptx2	CTACCTGTATGGCAAGATCAA, CTTCATAATGAGACCTCGGCT, GAAGACATTGCCTGAGCTGTA, GAAGATGAGAAGTCCCTGCTT, GATGCATTCAAAGTGTCCCTT	5	3723, 26721, 37377, 9132, 25662	0.1762	1284	0.0876	1320	0	0	1	2
Inadl	CCATTGTGTCAGTCAGCACAT, CCCATATTTATTGCCATGATT, CCTCGCAATGAACTATTCATA, GCCGGGAGAACTACACATTAT, GCCGTTAATCTACTGAAGAAT	5	2864, 73485, 9423, 52268, 66513	0.1763	1285	0.0877	1322	0	0	1	2
Hdac7	CCATGTTTCTGCCAAATGTTT, CTTCGGCAACTTCTCAATAAA, GCTGAAGTGATCCTGAAGAAA, TGCAGATCATTCTACAGCCAT, TGCGCTACAAACCCAAGAAAT	5	28457, 49496, 352, 10278, 31969	0.1766	1286	0.0881	1323	1	1	1	1
Tcf4	CCAACGGAACAGACAGTATAA, CCCAGTACTATCAGTATTCAA, CCGAGATATCAACGAGGCTTT, CGTCAGCTAGTGTTTCTAATT, GCCTCGTCATCTCCCAATTAT, GCTGAGTGATTTACTGGATTT, GGAGCAGCAAGTTCGAGAAAG, GTTTCAGCATTCCCAATTATC, TCGTAGTGGCACAAACCATTA	9	59509, 27533, 63861, 13813, 4547, 80239, 69747, 4962, 44645	0.1767	1287	0.1146	1707	0	0	2	2
Ppargc1a	CCAGAACAAGAACAACGGTTT, CCCATTTGAGAACAAGACTAT, CGTGTGATTTACGTTGGTAAA, GCCATTGTTAAGACCGAGAAT, GCGACTTCAGTAATGAACAAT	5	9235, 41227, 69833, 70021, 3493	0.1767	1288	0.0882	1325	0	0	1	2
Tnfsf14	CAGGTCCTATTTCGGAGCTTT, CTGAGACTGCATCAACGTCTT, GAGAAGCTGATACAAGATCAA, GCCAGCTTGATAGGTATTGGT, GCCCGGTTACTACTATGTGTA	5	61388, 16115, 641, 10191, 90052	0.1768	1289	0.0883	1327	0	1	1	1
Matn4	GCACCAGATAACAAGAATTGT, GCCATTGACTACTGCAGCTTT, GCTACAAGCTAGCACCAGATA, GTGATCCAGTATTCTAGTCAA	4	10557, 70677, 4922, 61470	0.1768	1290	0.0736	1103	0	0	1	1
Psmd9	CCAGGATCTGATGCGACGCAA, CCGAACAGCAAGGCACAACAT, GAGATGACTGTTTCCTGGGAT, GCAACATTATTCCTCTCCAGA	4	6010, 50278, 10204, 34608	0.1769	1291	0.074	1107	0	0	0	1
Egfr	CCAAGCCAAATGGCATATTTA, CCTCTGCAATATGGATACTAT, CCTGTCCAACTATGGGACAAA, GCAAACACAATAAACTGGAAA, GCAGTGGATCTTAAAGACCTT, GCATAGGCATTGGTGAATTTA, GCCAATAATGTCTGCCACCTA, GCCTATCAAGTGGATGGCTTT, GCTGGATGATAGATGCTGATA, GCTTTCGAGAACCTAGAAATA	10	3719, 48937, 44507, 51863, 62497, 57438, 45735, 10894, 58708, 4852	0.177	1292	0.1192	1772	0	0	2	2
Has3	CCAGGAAGATACCTACATGTT, CCGATCTGAAACGCAAAGAAT, CGTGAACTTCATTGGCCTAAT, GCAAGTCTTACTTTCGGGAAT, GCAATGTATTAGTGGGCCTTT	5	201, 10356, 53408, 12944, 42855	0.1771	1293	0.0885	1328	1	1	1	1
Ifng	CAGTCATTGAAAGCCTAGAAA, CCTTTACTTCACTGACCAATA, CGTCATTGAATCACACCTGAT, GAGCCAGATTATCTCTTTCTA, GCAGAGCCAGATTATCTCTTT	5	8743, 5044, 31990, 60984, 53346	0.1771	1294	0.0885	1329	0	0	0	2
Kat2b	ATGGAACATGAGAGTTTATTT, CAGTAATCAGTCCTCCTGTTA, CCGGGATATTATGAAGTTATA, CTCTTGAGAAACGCACGCTTA, GCACGCTTATCCTCACACATT, GCAGGTGAAGAACCATCCAAA, TCCCGAGAGCGAGTACTACAA, TTGCACACAGTACCAAGATTT	8	15027, 5294, 63827, 14794, 87665, 65257, 57501, 5412	0.1772	1295	0.1056	1568	0	0	0	2
Pabpc2	CGGTTTAAGTCTCAGAAAGAA, CGTTGACTACTGTAAGACCAA, GCAGAATTGATAACTGAGCAA, GCATCAGATATCAGGGCATTA, TCGCAGTAAAGGATTCGGTTT	5	66995, 81668, 16064, 7602, 7902	0.1773	1296	0.0889	1333	0	0	0	2
Abhd15	CCGAATGGAAGAGAGAATGAA, CGAATGGAAGAGAGAATGAAA, GATGAACTTGTGAGAGTCAAT, GCCACTATTTCCTGTCATCAA	4	46347, 79335, 11458, 2337	0.1774	1297	0.0742	1117	0	0	1	1
Snrpb2	CACAAATGCTTTGAGACAGTT, CCCTGATTATCCTCCAAATTA, GACAGTTACAAGGATTTCCAT, GCAGCTAATGATACAGAAGTT, GTCCCTGATTATCCTCCAAAT	5	60311, 1777, 36313, 9849, 53736	0.1774	1298	0.0891	1338	0	0	1	2
Mup8	CCAATTCCAGTCTATCCACAT, CCCTTCCTATCCATACAGCAT	2	2929, 16291	0.1774	1299	0.0273	397	0	0	1	1
Tspan11	ACTTCAAATGCTGTGGCAGTA, CCAGAGTATTTCTACCTATTT, CCCTCCAACATCTACAAGGTA, CCTGAAGTACCTGCTCTTCAT, GCGTACATCTTGTCTCAGGAA	5	91182, 9718, 35092, 46065, 2188	0.1775	1300	0.0891	1337	0	0	1	2
Vmn1r9	CACTAAATCCTGCTCACTCTT, CATCTCATTCACCTCAGACAT, CTGACCTTTGTTCACATAATA	3	604, 56857, 14147	0.1776	1301	0.0573	864	0	1	1	1
Olfr69	CATTACCACATTTCCATTGAT, CCATTGATATTGCTCATCAAA, GAGGTCTCTCATTACCACATT, GCATTACTGAGGTCTCTCATT, GCCATCTTAGGGTTTGACATA, GCTACTATCTTCTCTCCACAA, GCTATGATTGGGAACTCCCTA, GCTCGATTCAAAGCCTTCAAT, GTTCTACCTTCTGGCCTTCTT	9	14585, 37891, 9818, 25597, 82667, 14386, 882, 6219, 34316	0.1776	1302	0.1155	1723	0	1	1	3
Zfp319	ACAAGACGGAAGAACCCTTTA, CACCTCCACCTGCTAACATAG, CGCACACACAAGACGGAAGAA, GACTGCCCAGCTAGGACAAAT, GCAGATGTAAACAGGTCCCTT, GCATGGTCAAGTGCTCCATTT, GCCTTCAAGCAGCGAGAGCAT	7	33108, 55294, 37556, 64151, 46090, 6714, 3923	0.1777	1303	0.1005	1491	0	0	1	2
Isoc2b	ACTTCGAGATAGAATCCTCTA, CAGGTTCATGTAGCAGTGGAT, CCAGACGTTGATGGATGACTT, CGTGGTTCTGTCTTCCGATTG, GTAGCCCAGATGCTAGAAATC, GTCACAGACATCGGACTGTTA, GTTAGGCTTCTTCCAAGGCAA	7	51150, 36213, 4502, 69245, 6521, 6677, 79134	0.1777	1304	0.1005	1492	0	0	1	3
Prg2	CCACAGTTTCAGTGTTAACTT, CCCATTGATGGATGAGAACTT, GATGGGTTGATGGAAGTTCTT, GCCGATGCAAACGCTTTCGAT, GCGTCTATCTCACTGTGTCAA	5	9032, 48943, 25006, 65994, 4279	0.1777	1305	0.0893	1342	0	0	1	2
Mill2	CGCTATAATGTCAGAGCCCAT, CTGTGCAAGAGAGACTAACAA, CTGTTGAAGGTGGAAGAGAAA, GCAGTCCTACTGTTGATCTTA	4	1026, 58786, 11921, 59839	0.1777	1306	0.0744	1118	0	0	1	1
Gm19587	AGGACTAGATTGGCTGTCTAA, GATGCTGTTCTCTTGGTGTTT, GCAGGGAAGACAACAATTCTA	3	80288, 10193, 10969	0.1778	1307	0.0576	865	0	0	0	0
Gja8	AGAAGTCCCTCCACTCCATTG, CCCAATGTGGTAGACTGCTTT, CGTATCACACTATTTCCCTTT, CTTCATCCTCTTCATGTTATC, GAAGATCGTATCACACTATTT, GAATGAGCACTCCACTGTCAT, GACCTATGTCTGCCACATCAT, GATGAGAAAGAAGAGCTGCAA, GCAGATATGTCACGGAGTTAC, TCATCGTGGGCCATTACTTCC, TCATCTTCAAGACCCTCTTTG, TCTCCACTCCATCGCTGATGT	12	26901, 29711, 11491, 69589, 1596, 4630, 23792, 68152, 53386, 67362, 14725, 85546	0.1779	1308	0.1251	1853	0	0	2	2
Klk1	GCAGCATTACACCCGTCAAAT, GTCAAATATGAATACCCAGAT	2	458, 17162	0.1779	1309	0.0277	401	1	1	1	1
Pcx	CCCTTCAGCTATTTGTCCTTT, CCGAGGTGTAAAGACCAACAT, CTTTCGCTCTAAGGTGCTAAA, GCACTACTTCATCGAGGTCAA, GCGTCTGGAGTATAAGCCTAT	5	54660, 11766, 5672, 8589, 27114	0.1781	1310	0.0895	1345	0	0	0	2
1110003E01Rik	AGTCCTACTGCACCGACACAG, ATGCTCCTCTTCCTTCTGAGG, CACGAACATGCTATGAGGAGG, TGTTGGTTGGCCTAAGCTTAA	4	24273, 9230, 9168, 26035	0.1781	1311	0.0744	1120	0	0	0	2
Srl	CACAGGACTATAAGCCTGATA, CCAGTCTACAAGGCTTCCTTT, CCCAGCTTGATGTGGAAGATT, CCTCTCATCAATGTCACGGAA, GCACGGAAGATGTTGGCAATT	5	8183, 62405, 6923, 35402, 50517	0.1782	1312	0.0895	1346	0	0	0	2
Atad1	CATCTAGTAGACCCTCTTAAT, GCATGTTACTTGGAGTGATAT, GCCAAGAAACATATCCTGTTT, GCCTACACGATTTCATATTAA, GCGATGATGAAAGCTCAGTTT	5	1665, 81730, 25209, 9942, 22030	0.1783	1313	0.0895	1344	0	0	1	2
Rragd	ACAAGGACTCAACAGCCATTA, CAAGGACTCAACAGCCATTAT, CCCTACCTTTGACTATGAGAT, CTTTAGCAAAGTGGTTCAGAA	4	10367, 5819, 13569, 40146	0.1784	1314	0.0746	1123	0	0	0	1
Morn5	CCCTACTGACACGAGATACAT, CCGGAGGTTCTACACCGAGAT, CGCTTTCTGAGAAATGCTGAT, CGGAACCGCTTTCTGAGAAAT, GATGACGAACATGAGTGGATT	5	9988, 78620, 1541, 14194, 57199	0.1784	1315	0.0896	1348	0	0	1	2
Rin1	CCTGAGAAATAATGCACGCTA, CTCCTGTTAGAAGCTGAGTAT, GCAGCCACAATGCTAATGCAA, GCCACTATATCGAAGAGAGTA	4	11769, 43568, 35905, 1662	0.1786	1316	0.0749	1128	0	0	1	1
Tshb	CGCACCATGTTACTCCTTATT, GAGTATACAATGTACGTGGAT, GCCCGCACCATGTTACTCCTT, GTATTGTATGACACGGGATAT, TGGCAAGTGTAATACTGACAA	5	10112, 79416, 81469, 32729, 1202	0.1786	1317	0.0899	1349	0	0	1	1
Tspan32	ATGTTGAGGTCAACCAATTTC, CTGTGGACACACTACAGTATT, GACACCTATGACTTCGTGTAT, GATCCTCAAAGGAGTAGATAA, GCCCACAGAGATGAAGTCTTT, GCCGTCATCCAGGACACGTTT, GCTGCGGGTTTCCTGTGCTTT, TCTATGGCATCAGGAACATAA	8	73268, 15054, 2005, 73803, 38468, 44571, 84227, 6564	0.1786	1318	0.1072	1594	0	0	1	2
Sec11a	CGAACCGAGTTGAAGATCCTA, CGAGTCCTGAAGATCCATGAA, CTCGGCACTAATGATCTGGAA, CTGTACTACCAAGTCCTAAAT, GTACTGTTTCTGCTCGGTTTA	5	1636, 59740, 70948, 23791, 9978	0.1788	1319	0.0901	1351	0	0	1	2
Gsr	CCCAAATTCTAAGGGCCTGAA, CGCCTGAACACCATCTATCAA, GAGGGTAAATTCAGTTGGCAT, GCTGTTCATAAGTATGGGAAA, GTGTTGAAGTTCACACAGGTT	5	7854, 35789, 7906, 66346, 92092	0.1788	1320	0.0901	1350	0	0	0	2
BC048502	CATCCTAACAGCTTCAAGTCT, CTTCATTTGTTCTTGAGACTT, GATGGCTAACTGCAAATATAA, GCTCCAAAGAAGCTAGTTTGT	4	1724, 62891, 11764, 14957	0.1788	1321	0.075	1129	0	0	1	1
Fus	AGCAGCTATGGTTCTTCTTAT, CAACAGAGTTACAGTGGTTAT, CCAACAGAGTTACAGTGGTTA, CCCAGTGTTACCCTTGTTATT, CCTAGGCGAGAATGTTACAAT, GCGAGAATGTTACAATTGAAT, TCGACTGGTTTGATGGTAAAG, TGGGAATCCTATTAAAGTTTC	8	31684, 32312, 42563, 5496, 44688, 5241, 85332, 45153	0.1789	1322	0.1074	1595	0	0	0	2
Ranbp17	CCCAACAGTGTTCATTACTTA, CCCGAATCAATCCTTTACCTA, CGCATGTACTACTCCAATCTT, GCCATTGTTGTGAGAGATAAT, GCTGTGAAATTCATGCTGAAA	5	6639, 48644, 8321, 19611, 87282	0.179	1323	0.0902	1352	0	0	0	2
Fasn	CCCTTGATGAAGAGGGATCAT, CGTCGTCTATACCACTGCTTA, CGTCTATACCACTGCTTACTA, GCTGCGGAAACTTCAGGAAAT, GCTGGTCGTTTCTCCATTAAA	5	19923, 88328, 6042, 75290, 8528	0.1791	1324	0.0903	1354	0	0	0	2
Mob3c	ACAGCGCTTTGAGCTATATAA, ACCGTATCAACCTCATCTATG, CCGCTATATGGCATTGCTCAT, GAGATGACAGAACGGATCTGT, GAGCTATATAAGAAGGCACAA, GCACATGTCAACACCTGCTAT, TGGATAGATGATGGATGTATA	7	59178, 10588, 16755, 7783, 91464, 916, 29236	0.1792	1325	0.1022	1512	0	1	1	2
Cxcl15	CCAATTACTAACAGGTTCCTA, CCCAATTACTAACAGGTTCCT, CCTGAGAACAAGAGAATATTT, CGTTCTCATTCTTATACTCTA, GACCATTTACTGCAACAGAAA	5	2209, 65072, 9809, 22531, 40791	0.1792	1326	0.0905	1358	0	0	1	2
Tiam2	CGACAGAACATCTATGAGAAT, CGGGTGTTTAAGAGTCGAGTT, GCCACGAGTGATTTCAGCAAT, GCTAAGAAAGACACCCTCAAA, GCTTGGGAAAGTTGTGATTAA	5	9832, 73225, 2146, 37180, 40462	0.1792	1327	0.0905	1356	0	0	1	2
Gm6581	CAGCTACTGCATTTCTTACAA, CATTTCTTACAAGGAACTCAA, GCTGGATAATGATGCGGGATT	3	12147, 7042, 37063	0.1794	1328	0.0586	879	0	0	0	1
9430076C15Rik	CCCTTCAATAAAGACAGACAA, GCACGAGATGACTTTGAAGTT, GCCCACAAGATTCCTGAAGAA, GCCGGAATTTGGTTCGAGGAA, GCTGTGACTAATTCAGGGTTT	5	80276, 2919, 20760, 9589, 60615	0.1795	1329	0.0907	1359	0	0	1	2
Mier2	ACGGATACTGAACAGGACCTA, CCGTGTTCATGGGAAGAACTT, CGACATTGTGACAAGATCTAT, GCTTCAGAACATGGTGGGATT, GGCGAGTGTGTGGAGTATTAT, GTCACTGAATTTGGACTCATT, TGAGCTCGTGAAGTGTAATTT	7	6182, 68615, 52720, 5761, 65094, 21583, 32486	0.1795	1330	0.1024	1519	0	0	0	2
Xpo6	CCAGTTCTTCAGGACAATTTA, CCCATGTTCTACCATGACTTT, CGATGAGAGTTACATTGAGAA, GCCCAGGAGAAATTCGACATT, GCCCATGTTCTACCATGACTT	5	16648, 31692, 1754, 9982, 89100	0.1795	1331	0.0908	1361	0	0	1	2
Lime1	ACGTCCTATACTCTAGGGTTT, ACTAGCTCTGAGGCCACTTAT, CCTATACTCTAGGGTTTGCAA, CTGCCAAGAATTGCAGCAGAA, GTCTTTAACATGAGTTAGGAA	5	82564, 8277, 6910, 32314, 29403	0.1798	1332	0.0909	1365	0	0	0	2
Sh3tc2	CCATGAGTTCAGTACGAAGAA, CCTGGAGGAAATCTGGAAGTT, GCCTACTTGGTTCTCCAGAAT, GCTGACAAGGAAGGAGAATAT	4	3977, 23360, 19046, 11079	0.1798	1333	0.0757	1132	0	0	1	1
Fech	CCTCTTGGTTCCAATAGCATT, GACGCTCTACGAACTGGATAT, GCACACAAATTCTACACTTAT, GCACCTCACAAATACTATATT, GCGGAGTCTCTTAATGGAAAT	5	18752, 10035, 1641, 28488, 37432	0.1798	1334	0.0909	1362	0	0	1	1
Sema4a	CCTGGCCTTGAATATCCAGAA, CCTTCATTGAACTCCAAGATT, CGGACATTGAGCGAGTCTTTA, GCCTGTTCTCAAGACTGACAT, GCTTATCTCGTGGAGGAGATT	5	39036, 133, 10541, 11763, 89842	0.1799	1335	0.0909	1364	1	1	1	1
Tmod4	CCCTTTATTCAGCCTAAGAGA, CCTCAATAATATCCAGGACAT, CCTGAACATTGAGTCTAACTT, CCTGACAAGTATAAGCCAGTA, GAGCCTGAACATTGAGTCTAA	5	45721, 71107, 8687, 5714, 43929	0.18	1336	0.0909	1363	0	0	0	2
Dclk3	AGGAAGCTATAGCGCGGAAAT, CCAAAGATCTGGTGAGAAATT, CTGAAGGGTAAGGAGGACATT, GTCCACATGCACGACAAGAAT, GTGGAGAAGCACTATGACATA, GTGTGTGGGACGCCAACATAT, TATGTGGTGAGGCCTATATTT, TGCAGAGCAGATGCCATAATC	8	73557, 85392, 28133, 28515, 83062, 3069, 44459, 6279	0.1803	1337	0.1088	1614	0	0	1	2
Car10	CAAAGAGCACTTGGTCAATAT, CCACAGACTATAAGAATGGAA, CCACTATAACCACGAGCTATA, CCACTCAATAATCGCTGTATT, GCCAATTTCATCGTCTGCATA	5	764, 66119, 47176, 19668, 10370	0.1805	1338	0.0918	1370	0	1	1	1
Arf1	CCCATCTCCATGTGTGAAGTA, GAGACTGTTGAATACAAGAAT	2	17430, 460	0.1807	1339	0.0291	415	1	1	1	1
Olfr25	CCATTTGTAAGCCTTTACTGT, GCTGAACCATACTGTTATAGT, GTGTCATATTTGATAGGGTTT	3	2185, 50326, 13884	0.1808	1340	0.0596	900	0	0	1	1
Ypel3	CAACCACATGATCAAAGACAA, CATCCACTGTGAGAACTGCAA, GCCTACCTCTTCAACTCTGTA, GCTGGAAATATGAGCAAGCCT	4	66992, 42907, 4093, 11117	0.1809	1341	0.0765	1144	0	0	1	1
Dctpp1	CAGAACTCTTCCAGTGGAAGT, CCAGTGGAAGTCTGATACAGA, CCTCATCTACCTGGTAGCATT, CTCATCTACCTGGTAGCATTA, GTGGATTTACCTCAAGCAGTA	5	35119, 21617, 5481, 40510, 8822	0.1809	1342	0.0923	1374	0	0	0	2
Pts	ACCTGGATGTGCCGTACTTTG, AGTGTTTGAAACCGACAACAA, ATAGGTCTTAGGGTTGCTATT, CAGTCCTCTCAAGGCTATTTA, CCGAGCATTAAAGTAATGTAA, CCTCAAAGAATACATGGAGGA, CCTGTTACAGGAATGGTTATG, CGACAACAACATCGTAGTCTA, CGTAGTCTATAAAGGAGAATA, GCCTGTATTTAGATGTATTTA	10	42852, 46836, 42527, 44789, 29796, 5961, 20974, 84131, 18392, 798	0.1809	1343	0.1234	1829	0	1	1	2
Srp9	AGACCAAGCGCAAGACGTAAA, CAGTCAGTTAATGCGACTTAT, CCCGCAATGTCACTATGGAAA, GATGGGAATTTGTGTATCAAA, GCTTCCTAATAAACCACAAAT, TGATCTAGTTTGTTTGGTGTA	6	28513, 5959, 61506, 7352, 18465, 63526	0.1812	1344	0.102	1510	0	0	0	2
Lcor	CCAATAGCACAAAGAACCAAA, CCAGATGTTTCTGTAAAGATT, CCATTCATCTCCTGTAGATTT, CCTCACAAAGACCAGATACAT, GCACTTAATCTTATCCAGGGA	5	83890, 9595, 83284, 3205, 31984	0.1812	1345	0.0928	1379	0	0	1	2
Qpct	CAAGTCTTTGTGTTGGAATAT, CCATGTGCAATGATGTTGGAA, CCATTGCTGATAGAACGATAT, CCCAAGACTACCAGATGGTTT, GCATTTCTGAAATGTGGCAAA	5	27554, 2973, 83119, 9680, 50213	0.1813	1346	0.0928	1380	0	0	1	2
Ptprd	ACCACTTAGTGGGACTATTAC, CAGAACCTGAATCTGAAACAA, CCACTAAACTTCAAAGCAGAA, CCAGAAGATGATATGCCGATA, CCGGAATGGAGCTCGAATTTA, CGGGTTCTCTTATCAGCAATA, GAAGTCATATTCCTTTGTGTT, GAGAAGTTGAATTAAAGCCAT, GCCAACTACATAGATGGCTAT, GCCAGTTTCCTTGATGGATAT, TAAGTCCCTACTCGGATTATG, TCTTGGAACTTGCAGATCATA	12	15662, 4896, 64948, 14189, 37352, 77602, 50889, 89086, 49491, 45842, 18924, 1124	0.1816	1347	0.1297	1920	0	0	2	2
Ush1c	GACTGGATAGACCTTGTGGTT, GAGTCCCTCAAATGGCAGTAT, GCTGGTCATCAATGAACCCAA, GTAGGGTTCCATCTCCCATTT	4	12278, 16410, 780, 48420	0.1817	1348	0.077	1151	0	1	1	1
Ppp2r5d	AGACCCTAGAGAGCGGGATTT, CATCGCATCTATGGCAAGTTT, CCAGCCAAATATAGCCAAGAA, CCTGAAACTGTTCTGAGAAAT, GCATCGCATCTATGGCAAGTT, GCCCTCTACTACTGGAACAAT, TCATGTTTCCTGCACTCTATA	7	89699, 65752, 41049, 67907, 6886, 3966, 65230	0.1818	1349	0.1049	1556	0	0	1	2
Dgkz	CCCAAGATTCAGGACCTGAAA, CCTGGATGTCTTTAACAACTA, CCTGTAAGATCGTGGTGCATA, CGAGGCTCTACATTATGACAA, GAGAAGTTCAACAGCCGCTTT	5	4837, 9092, 76881, 71703, 80686	0.1819	1350	0.0933	1385	0	0	1	2
Prr5	CAGTATCCATAACGGAGTGAT, CCATTCCTGTATCCTCGAGAA, GAAGGGATATTCATTGACTTT, GCCTGAGACTAGTTCATGTTT	4	7932, 55465, 9908, 10412	0.1819	1351	0.0771	1153	0	0	0	2
Cxcl12	CAAGAGTACCTGGAGAAAGCT, CATCAGTGACGGTAAACCAGT, CTGAAGAACAACAACAGACAA, GATCCAAGAGTACCTGGAGAA, GCCAACGTCAAGCATCTGAAA	5	8081, 7907, 45438, 26503, 43236	0.1821	1352	0.0934	1391	0	0	0	2
Tmprss9	ACACTGTTTGTGAGTAGTTTC, ATCCGTTTCACCAGTTCTTTG, CACAGCTGCTGGCCTCATTAT, GCTAAGAAGCCTGGCGTATAT	4	68270, 10722, 78124, 5575	0.1823	1353	0.0772	1155	0	0	0	1
Slc25a29	CAGTCACTGTGGTGCTTACAT, CTTCATCAATGCACTGGTGTT, CTTCCTCACCTATGATGTAAT, GCCGTTCTTCAAATCCTCCAT, GTGGTTAAGTCACGACTGCAA	5	90127, 87842, 9746, 67881, 2961	0.1824	1354	0.0934	1392	0	0	1	2
Npl	CCAAGCTAAAGAGCCTGGATT, CCAGTTTCGTATCCAGAGATT, CTCTACTTATACAGATGCAAT, GAAATCAACTTTCCTGTCATT, GCTGTCATTGCGCCTTTCTTT	5	46659, 47907, 52267, 2164, 10015	0.1824	1355	0.0934	1386	0	0	1	1
Ssr4	CAACTTCAGATGCCGTCATTT, CAGAGAAATAATGAGGACGTT, CGGGCACCTATGAGGTCAGAT, GACTGTATTCATCGTGGAGAT, TGGCTCTTTATGCCGACGTTA	5	5547, 82921, 71708, 8893, 72837	0.1825	1356	0.0934	1388	0	0	0	2
Olfr1225	CCAATGTACTTCTTCTTGATA, CCACAGCTCTGAAGGGAAATT, CCCATATTATTGTTGTGGTTT, GCAAGCCTCTTCACTACTCTT, GCACGACCTATATCTGCATTT, GCCTCTTCACTACTCTTCCAT, GCTCTGTGGCAATCTTGTGAT	7	31093, 4992, 6576, 34626, 13722, 91630, 86222	0.1825	1357	0.1053	1567	0	0	1	2
Atm	ACAGATTACAACCCGATTAAT, CCACCATATTTGGACAGGAAT, CCCTTTGCTGTGACCTATTAA, CCGTGGAGATTTCTCAATCTT, CGATGGAAGTTATGCGGAGTT, CGCTTAGCTGGAGGCTTAAAT, CTATTACCTTTCGTGGTATAA, CTTACTAGAATACGGACATAT, GCTGAGACAAATAATGTCTTT	9	36587, 47075, 1162, 42771, 15798, 6308, 29267, 18073, 68390	0.1826	1358	0.1204	1781	0	0	1	2
1810030O07Rik	ATCTACCTGGCTTCGAGATTT, CGAAATGAGATAATGCACTCT, GAACGAGATGGGTGTGAATTT, GAGGTGATAAAGTGTCGAAAT, GCAGTATATTCCAGAATAGAA, GCTTATTTAATCTTCCAGGTT, GTAGCAGTATATTCCAGAATA, GTGAGCCAAATCCACGAAATT, TCACCTCTGGACGTTACTATG, TTGCCAGAAGAGATCTCAAAT	10	77535, 3276, 61854, 39532, 5194, 11238, 6037, 41185, 16120, 62538	0.1827	1359	0.125	1851	0	0	1	3
Idh2	CCTCAGCAATGTGAAGCTGAA, CGTGGATGTTCAGCTCAAGTA, GAAGAGTTCAAGCTGAAGAAA, GCTCTACTTGAGCACCAAGAA	4	10989, 69532, 88569, 4855	0.1827	1360	0.0777	1166	0	0	1	1
Ctif	CGCCAATACCTTTGATTCCTT, GCAGTACTACAACAGGACCAT, GCTGGCAAATTACAACCAAAT, GCTGTTCTATGGAGCTACAAA	4	70778, 11842, 50857, 2297	0.1827	1361	0.0777	1168	0	0	1	1
Mmachc	CAAGTGTCTCACCACCTGTAT, CCTAGCACTACATCTGAGCTT, CTTGAAGGTTTCAATTTCCAT, GCCAAATTTGCCACCCAGAAA, GCTTATTACTACCAACGACAA	5	66315, 79020, 66749, 10686, 208	0.1827	1362	0.0934	1387	1	1	1	1
Tob1	AGGTAGTAGTACCAATGGAAT, CCAGGAGACGTGTCAACATTT, CCATACAAAGGCTCAGGGTTT, GCACTAATAAGTGGGTTTATT, GTTTGAGGTTTCCTACCAGAT	5	9610, 65022, 91637, 44618, 3438	0.1828	1363	0.0934	1390	0	0	1	2
Serpinb2	AGATCCTAGAACTTCCGCATA, CCACAGTTTGTGGCCGATCAT, CCCGAAGGTTCTGTAGATGAA, GCAGTTATGGTATCACCACAA, GCTTTATCCTTTCCGTGTGAA	5	7261, 16808, 78040, 8336, 49994	0.1828	1364	0.0934	1389	0	0	0	2
Ceacam20	CCATAGTCTTTACTGCAAGAT, GCACTTTAGAATCCAGCCATT, GCTTGTGTTGAATGAGCGCAT	3	45528, 10351, 11321	0.1828	1365	0.0606	917	0	0	0	0
Abhd11	AGACTGAACTTGGATACGTTA, CCGCTGTCTTATAATCTTCTA, CGATTGGTTGTTGTAGACATA, GCAGCTTAGTTCGGTTGTCAA, GCTTGGTGGAAATTCTACATA	5	3337, 32946, 17953, 9648, 72704	0.1828	1366	0.0934	1393	0	0	1	2
Gm6026	AGCCGTGTAGATCGTTTCCTT, CAATTTCCTGTTAGCCGTGTA, CGAGTACTTAACACCCAACAT, GCACTTGTATTCCTTGTGGGT, GCTCGAGTACTTAACACCCAA, TCCTTGGAGAGGGAATCTATT, TGAGCTCTTCTGCACTTGTAT	7	6432, 54318, 44959, 38861, 35628, 5467, 70810	0.1828	1367	0.1056	1573	0	0	0	2
Rnd3	ACCGGAAAGATGGAGTCAAAT, ATTACGTCCCTACGGTGTTTG, CAGAACGTGAAATGCAAGATA, CTTACATAGAATGCTCAGCTT, GCACATTAGTGGAACTCTCAA, GCGTGTGTAAATAAGACAAAT, GTGAGGCTTCGCCGTCTATAA	7	80932, 44651, 261, 53526, 8169, 47837, 58561	0.1829	1368	0.1056	1574	1	1	1	2
Rhot2	ACCATCGTGGCTACCAGTTTG, CCCACTCATATCGTGGATTAC, CCTGATTCTGTGTGAAGTGAA, CTACCATATACAAGCGTTATT, GCCCACTCATATCGTGGATTA, GCTACCATATACAAGCGTTAT, TACCATATACAAGCGTTATTA, TCTCAGAGCTGTTCTACTATG, TTCGGCCTGTTGGAGTAATAT	9	20470, 20316, 55782, 1847, 61394, 20264, 6096, 21500, 70441	0.1831	1369	0.1206	1788	0	0	1	2
Lcp2	CAGTAAGTTGAGTCAAGATAT, CCATCGTTTCTTATTTGGTTT, CCCTTAGATGAAGAGTGGTAT, CCCTTCATACTAGGAAAGAAA, GCTGTGAAGAAATACCACATT	5	25265, 38145, 33442, 1461, 10291	0.1831	1370	0.0936	1396	0	0	1	1
Svs5	CTAGTAGTCACATGGGTATAA, GAACTCTTGGAGTAACTTTAA, GAGAACTCTTGGAGTAACTTT, GATGTCTTCAGGATTCAAGTT	4	3292, 31266, 11546, 45237	0.1832	1371	0.0778	1171	0	0	1	1
Dos	ACGAGAAGACGGACGCTCTTT, CCATGCCGACTTCATTCAGTA, CCGACTTCATTCAGTACATTG, CCTACTTCAAGGTCAAGAAAT, CTTCAAGGTCAAGAAATGGAA, GCTTCAAGTTTCCCAAGCTTT, GGACTCTCCGGTCCATATATG, TCATCCCAGGTGCTGATTGTC	8	42376, 71375, 37488, 73978, 5234, 32720, 5676, 41460	0.1833	1372	0.1119	1656	0	0	0	2
C1s	CAAGTGCATCAGAGGATATTT, CTCTACAGTAAACGTGTCTTT	2	15632, 6621	0.1833	1373	0.0304	440	0	0	0	1
Prl2a1	CCTACTGAAATTAGCAAGCAA, CTCAAGATGGTGAAATGCAAA, GACTGAAGATATTCGCCTCTT, GCCCATATGCTCAGTAAGGAA	4	84052, 3674, 30423, 11425	0.1833	1374	0.0778	1174	0	0	1	1
Rab11b	CAAGACCATCAAGGCTCAGAT, CCTAGAGAGCAAGAGTACCAT, CCTATTCAAAGTGGTGCTTAT, CCTCACAGAAATCTACCGTAT, CCTGTCTGCAAGTGAAGCAAT	5	9699, 47018, 3288, 60746, 91131	0.1834	1375	0.0941	1400	0	0	1	2
Gjc2	CCATCTATTCAGATGAGCAAT, CGTGGTTAGCTGTCTATGCTT, GCAATCCAAGTTCACCTGCAA, TCAGGAACAACTGGCCACTAA, TCTGTCATGTACCTGGGCTAT	5	71929, 80609, 22570, 6321, 8690	0.1834	1376	0.0941	1399	0	0	0	2
Gm5647	CCAGTTAAGAAAGAAGCCCTA, CCCAGCATGTTTCCAAACAAT, GCAGCCTTTGTACCATTATTT, GCTTCATTTGCAGCCTGTTAT	4	40131, 82805, 12453, 635	0.1836	1377	0.0781	1177	0	1	1	1
Rgs12	CCTTTGGAAGATCTAGGAGAT, CGCCTTTCAAAGAGAGAAGAA, GCATGACAGTTTACAGGCTAT, GCTTTCGGAATGCAGAACCTT	4	11187, 27712, 54211, 4450	0.1836	1378	0.0781	1175	0	0	1	1
Lcn8	CACTGTGAAAGCCGTGTACAA, CTTCTGGCTGTTCCGGGAAAT, GAAACTTCCATGTGCTCAAGT, GAAAGTTCACTGGGTTCAGAA, TACCAGAGAAGATTGCAGGAT	5	8493, 62590, 6968, 19068, 82692	0.1838	1379	0.0942	1401	0	0	0	2
Lrit2	CCAACCATTGCATGGAAGTAT, CCTATTAAACTATGCCTGATA, CCTTCATTACTTTGGGTTCTT, GATCTCAAACACAACCGGATT, GTTTGTATGAAGCCAACTATT	5	82269, 36513, 64252, 10645, 513	0.1838	1380	0.0942	1403	0	1	1	1
Pank4	CCATTGATATAGGTGGATCAT, CCCTACCTCCTAGTCAACATT, CCCTCATAAATGTGCCTTAAT, CCTACCTCCTAGTCAACATTG, CGCACAATCACCTACAGCATT, CGCCTGCATTTCATCAAGTTT, CTGTGTTCACACCGGAGTATT, TGACCAAGTTGGCATACTATT	8	76705, 86190, 6674, 63672, 40384, 91677, 66653, 2302	0.1838	1381	0.1126	1677	0	0	1	2
Olfr317	CCCATGTACTTCTTCCTCACA, CCTCACCCTCTTCTACAACAT, CGGAAATATCATCTACATGTA, GACGGCAGAAAGCATTTAATA	4	37326, 11843, 2513, 41657	0.1838	1382	0.0781	1176	0	0	1	1
Pik3ca	AGAATATCAGGGCAAGTATAT, CCAGATGTACTGCTTAGTAAA, CGAATCCTAGTGGAATGTTTA, GCAACCTTTATCTTGGGAATT, GCCGATTGATAGCTTCACCAT, GCCTTTCAATCTGCTCTGTTA, TATAGGTCTGAGTAAGCTAAA, TTCAACTTGTACAGGTCTTAA	8	8092, 6035, 10939, 7429, 28398, 4221, 9845, 66168	0.1838	1383	0.1126	1676	0	0	1	5
Sntg2	CGTCACCATCACTGTTGAGTA, CTACAGGTTAATGGCATTAAT, GCAGATTGAAACGAAGGAGCT, GCGTTCAATCTCAACCAACAT, GTTGCGTTCAATCTCAACCAA	5	80026, 9258, 4723, 11471, 63982	0.184	1384	0.0942	1404	0	0	1	2
Med8	CAAGGTCTTAAAGCATGAGAA, CTATCTAATTGGCGACCTTCA, GAATCAAGTGGCCGATCTGAA, GAGTTGAGCAATGACATGATT, GAGTTTCATTTACAAGTTGGA	5	8175, 25713, 7981, 43405, 84021	0.1841	1385	0.0942	1402	0	0	0	2
Thnsl1	CGTAAGACTGTACTATAAGAA, GACGGACAGTTAATGGCAAAT, GCACGTAAGACTGTACTATAA, GCCTCTAATCAGAACCACGTT, GCTAACAAAGACGGACAGTTA	5	13879, 3135, 44735, 28774, 9791	0.1841	1386	0.0942	1405	0	0	1	2
Flot1	AGCGTGGTTAGCTACACTTTG, ATGATGACCAGGATTACTTAC, CAGGATTACTTACACTCGTTA, CCAGGATTACTTACACTCGTT, CCTACCCTGCATTCAGCAAAT, GACTGTGGAGGAGATCTATAA, GCACACCTCTCCTTGCCAAAT, GCACAGTGCCTCAGTGAAATA, GTAAATCACAACAAGCCTTTA, TCGTGCTGAGGCTGAGCAAAT	10	61332, 29145, 29990, 12887, 6105, 41830, 43867, 27025, 716, 51829	0.1843	1387	0.1275	1889	0	1	1	2
Klf12	CCAGCAGTTCTTGCACATCAT, CCCAGCTTTCTGTGGCAAATT, CCGAGGAAATCGAATGAATAA, GCCCTTGAGAACAGAATGCTA, GTCCGAGGAAATCGAATGAAT	5	21600, 4427, 13757, 9378, 65738	0.1844	1388	0.0946	1406	0	0	1	2
Nsfl1c	AGCTACCAAGACCCATCCAAT, CCAGAGGAAGAGTCTGCCTAT, CCCAGGTATTAAACACCAGCT, GATATGGAGGATCATCGGGAT, GTAGTGCTAAAGCTCTGGAAA	5	80147, 84270, 5615, 45922, 8987	0.1845	1389	0.0946	1407	0	0	0	2
Zfp354a	CATCCCTGTATAAACATCTAA, CCCTGTATAAACATCTAAGAA, CGGATAGCACATCAGCGAATT, GCCCAAAGTCACATAGAGAAA, GCTGGACTTCTCAGTAGCAAA	5	64694, 6508, 13629, 8691, 32192	0.1845	1390	0.0947	1409	0	0	0	2
Rps6	CCCAAGATTCAGCGACTTGTT, CCGACGTATTGCTCTGAAGAA, CGCTAATCTCAGTGTTCTCAA, GCACCCAAGATTCAGCGACTT, GCCCTTAAACAAAGAAGGTAA	5	78965, 1845, 80029, 47947, 10258	0.1847	1391	0.095	1414	0	0	1	1
Mrgpra5	CAAACTTCTTTACTAGAGCAT, CTTTACTAGAGCATACCTGAT, GCCCTTTGTCATCTACTACTT, GTCTGCATTCTGAATAGGTAT	4	60080, 12379, 35349, 1117	0.1848	1392	0.0786	1185	0	0	1	1
Gm5755	GAAGGAGATAACTTTGTGAAA, GAAGTATCACACCACAGTTAA, GAGAAGTATCACACCACAGTT, GCTCCTTTGAGAAAGATCTTT, GTCTTCAACCAACTCTTCAAA	5	62806, 8174, 14624, 86280, 8110	0.1848	1393	0.095	1412	0	0	0	2
Gpn3	CCGCTCTTTCAGGAGACTTTA, CCTCCATGTTTGATGAGTATT, CCTGCTGAGTAAGAAAGCCAA, GCATGGAGTACTTTGCCAATA, TGCGGAGTGTTCCTTGTTGAT	5	3717, 89113, 53791, 9653, 29803	0.1851	1394	0.095	1413	0	0	1	2
Vps36	CAAACAGCTGGCTGGAATATT, CAAGATGCTGGAAGCGCTAAA, CCAGTCACTACAAACAAATAA, GAAGAATAATGAGTGCTGCAT, GCAAGCTGATGATTAAGGCTA, GCTGAGTATGGGAATAGCCAA	6	66602, 5767, 27626, 35861, 89036, 7620	0.1851	1395	0.1066	1584	0	0	0	2
Ada	CAAGCCAGAAACCATCTTATA, CGAGGATGAAGCTCTCTACAA, GACTACTACATGCCTGTGATT, GCGGTTGTTCGCTTCAAGAAT, GCTGGCTAGGATGCTAAGAAA	5	4029, 65796, 39514, 9560, 63656	0.1852	1396	0.0953	1415	0	0	1	2
Ubtd2	CACAGACACAGTGTTTCACAT, CCAATCAACATGATAGAGGAA, CCAGCCTCTGATACTCTTATA, GTTTCACATGAAGAGGCGCTT	4	9404, 47145, 55229, 9649	0.1853	1397	0.0789	1186	0	0	0	2
Kcnb2	CCACAACTGTAGGCAAGACAT, CCCACGAACATCTGAACAATA, CCTTACACTAAGCAGAGATAA, CGCCAGGAGAAAGCTATTAAA, CGGAGAGTTAAGATCAACGTA	5	38314, 89106, 31963, 4791, 9310	0.1853	1398	0.0955	1416	0	0	1	2
Sox17	AGCGGTCTACTATTGCAACTA, CCCACAATCACTGTCCAGTTT, CGCACGGAATTCGAACAGTAT, CTTTGTGTATAAGCCCGAGAT, GCTAAGCAAGATGCTAGGCAA	5	54514, 387, 10783, 48845, 48899	0.1854	1399	0.0956	1418	1	1	1	1
Golm1	GCAGCAGGATATCTTCCAATT, GCAGGGAATGACAGAAATATA, GCCTACAAACTCCTACCTGAT, GCTAGGCTTCAACTACTGGAT, GCTGAAACCAACAACCAACAT	5	87220, 249, 10841, 57822, 13940	0.1856	1400	0.0958	1421	1	1	1	1
Nucks1	CAGCATCTAAAGCAGCTTCTA, CAGCGATGAAGATTTCCTAAT, CTTCGAAGAAATCAAAGGAAA, GCCACCAGAATCAGTCTTAAT, GTTGTGGATTACTCTCAGTTT	5	9122, 61148, 76055, 5409, 25191	0.1856	1401	0.0958	1420	0	0	0	2
Spink5	CCACTATTAGTACCTCTAATT, CCAGGAAGAATGGACAACTAT, CGTCAGACTAATACACGCATA, GCAAGTGTATTCCTACTAGAA, GCGTGAAGCTAATGAAAGAAA	5	6208, 47368, 48938, 8859, 23066	0.1857	1402	0.0958	1422	0	0	0	2
Gna13	CCTTACAGAATCTCTGAACAT, CCTTGTCTCTTCAAGTGAATT, CGCGATCAACACAGAGAACAT, GCAACCTTACACTAGGTGTTT, GCTGGGTGAGTCTGTAAAGTA	5	232, 10859, 26163, 73554, 30082	0.1858	1403	0.0959	1424	1	1	1	1
Entpd1	CCAAGGACATTCAGGTTTCAA, CCCATGCTTTAACCCAGGATA, CCGAACTGATACCAACATCCA, CCTTGGTTTCACCTCTATCTT, GCTCCTGGGAACAGATTCATT	5	24549, 16353, 3051, 9920, 56983	0.1858	1404	0.0959	1426	0	0	1	2
Nfasc	CCCTCGAGATAACATCCTGAT, CCTGAATCTAATCCCAGTGAT, CGATGGTTTAAGAATGGGCAA, GCAACTGCAGACCTACCATAA, GCCAAGTTCGAGAACTTTAAT	5	66271, 40281, 91090, 2102, 10237	0.1858	1405	0.0959	1423	0	0	1	1
Lmbr1l	ATCCAGGTTGTGCTGATATTT, CATCGATGACACAGATCATTG, CGCGAGTGCATCATCTCAATA, CGCTTCAACTGGCTAGGCAAT, CTCGTCTTCCTTATGCCCTTT, CTCTACATCCTCTGCCATATC, GCAGCTCTGACTCGAAGAATC, GCATCCGCCATTGTAGACAAT, GCCATGTTTACATGATTTGAT	9	33040, 5449, 48486, 73914, 75387, 55443, 4097, 76077, 15959	0.1859	1406	0.123	1822	0	0	1	2
Ptpn6	ATGATCAGGTGACTCATATTC, ATGCATCAGCCTTGATCCCTG, CCACCTTAAGTACCCACTGAA, CCGGAACAAATGTGTCCCATA, GAATACAAACTGCGAACATTA, GAGGAGTTTGAGAGTCTACAA, GCTAGACTGTGACATTGATAT, TACTACGCTACTCGGGTAAAC, TTCCACCCGATAGACTGAGAC	9	53029, 30450, 20248, 42428, 48090, 6348, 43247, 1404, 38733	0.1859	1407	0.123	1826	0	0	1	2
Il12rb1	CCTCTGTACTTGACGATCTTT, CGATCTTTGGAGGACCCATAA, GAGGTGCAGATTTCCCGTTTA, GAGTTGCTACAGGGTTTCCAA, GCCCACAACGAATTGGACCTT	5	92279, 24755, 9210, 5201, 67874	0.1859	1408	0.0959	1425	0	0	0	2
Lbp	CCGCAAGGACTTCTTATACTT, CCTGGGCATTGACTACAGTTT, CCTTAACTACTACCTTCTCAA, CGCAAATCCTTCCTGAAACTT	4	8721, 19701, 22759, 9929	0.186	1409	0.08	1205	0	0	0	2
9130017N09Rik	CACAAGAATCTCTTGGCGGAA, CCAGACCAGATGTAAAGAGAA, CTGAAATGATAATCCACCGAT, GCTTGGTACTGGATGAAGATA, GTGTGGTGAGATTAGGGAATT	5	45287, 4551, 16927, 9433, 85185	0.186	1410	0.0961	1427	0	0	1	2
LOC675521	CGCTTTGAGCAGTTTGAATTA, GATGCCAATGAAGACTACGAA, GCAACAGTGATGAAATCCAAT, GCCTCCAACGTTCCTGTTAAA, GCGCTTTGTATCATCTGCCTT, GCTGTGTCTAAGATTCTCCAA, GTGTCTAAGATTCTCCAAATT	7	27348, 35539, 34900, 8193, 22988, 47932, 621	0.1861	1411	0.1093	1619	0	1	1	2
Vsig1	CCATCAACAGTCTTGGCAATA, CCCAACAAAGTGAGGCAATTT, GCAACATTTGAGCATAGCATT, GCAATTCAAAGACCGAATAAT, GCTTTCAATTCAATGGTCTTT	5	41808, 8658, 6918, 81847, 57577	0.1863	1412	0.0965	1431	0	0	0	2
Fam102a	CCTGGACTTCAAATTCTATAT, GACTTGAACCTAGCCGAGTTT, GACTTGACACACCGCAGAAAT, GCATCTATCAGATCGCTCTTT, GTAGATGACACTCGAATTGAT	5	45244, 46139, 10000, 2903, 21294	0.1863	1413	0.0965	1430	0	0	1	2
Rbpms2	AGGAGGTCCGCACACTGTTTG, ATGAAGGGTCCCTGATCAAGC, CGTCCATTCAAGGGCTATGAA, CTACCTGCTCTTCCGTCCATT, GCAAACTAATAGCGACACCAA, GCATGTCTGTGCTTTACCTTT, GTGGATATTAAACCTAGAGAA	7	7948, 1401, 87245, 88294, 66155, 60817, 70828	0.1864	1414	0.1097	1625	0	0	1	2
Ntn5	ACCCACAGTGTCAAGGCTATT, CTACTGTGACCACGCCCATTA, GAACTAAAGTGAGCTACTAAT, GATACTGTCAGCAGGATTATG	4	90035, 40965, 595, 12663	0.1864	1415	0.0803	1207	0	1	1	1
Sv2c	ATAGATGAGCTGATCGAAATT, CACCGAACTGTACGGAATTTG, GAGAAGGTCTTCACGGTAAAT, GTAACGTGTAGCTGCGTATTG, TTCAAGAACTGCACGTTTATT	5	21309, 60239, 4713, 85379, 9403	0.1865	1416	0.0968	1435	0	0	1	2
Efcab2	CCCGAATCAAACACCATTAAT, CCTAAGAGATAATGAGCTAAT, GAGGCACTAATTGCAGAACTT, GCGTGTATTCATCTGTTGTTA, GTGAGAGAGATTGGGACAATT	5	9617, 22548, 14396, 74688, 4086	0.1865	1417	0.0971	1437	0	0	1	2
Usp9y	CCAGCCATTGAGAGAAGTGTA, GCACCACAAGATAGAACATTT, GCAGCCCAGATACATATCTTT, GCTCTTACTTTACAGGATCTT	4	64876, 6664, 10656, 48660	0.1866	1418	0.0804	1209	0	0	0	1
Mrpl37	CCACGTTTATGAAGTGAAAGA, GCTCCTGTTTGCTTTCGCAAA, GCTCTGTACTTGCATGGTGTT, GCTGTGTAAATCCCAGATTCT	4	675, 12670, 60009, 28088	0.1869	1419	0.0809	1217	0	1	1	1
BC005764	CCCTTACATCACACAGGACAT, CGATGTACTTCAACGCGGTTA, GAGTCCATGTATCAGCAGAAT, GATGTACTTCAACGCGGTTAT, GTCCATGTATCAGCAGAATAA	5	59644, 24985, 15142, 6506, 8835	0.187	1420	0.0972	1438	0	0	0	2
Olfr204	CAGATCCATCTCTTAATGGAT, GAGTTTGTTCTCAGAGGAATA, GCGATTTCTTGCACAGATCCA, GTGACTATCGTAGTCTCTTAT	4	9623, 57982, 34872, 9695	0.187	1421	0.081	1218	0	0	0	2
Heph	CAGGATATGCAGTGGAACTAT, CCATAACTAAATAGAGGACAA, CCTGGGTTCCAAATATAAGAA, GAGGACAAAGAACATAAGTAT, GCCTGAAGATATCTTCAGAAA	5	9011, 26357, 12376, 5994, 26624	0.187	1422	0.0973	1440	0	0	0	2
Calb1	CTCATGCTGAAACTATTTGAT, GACCTCATGCTGAAACTATTT, GATTGGAGCTATCACCGGAAA, GCAACGGATACATAGATGAAA, GCCAACAATAAATCCTAGAAT	5	14549, 1354, 70070, 10565, 84326	0.1872	1423	0.0973	1441	0	0	1	1
Fam161a	CCAATGCTTTGTGAAGAGTGT, CCAGCTTTCTGTTTCTCAGTA, CCCTTTATGAGGATCTAGTCA, GCTTTCTGTTTCTCAGTACTT	4	36710, 12674, 736, 21306	0.1872	1424	0.0813	1222	0	1	1	1
BC020535	CCTAGAGACCTCTCTTCAATT, CCTGCACTCTATGCCTCTTTA, GCCGACATCACTCATGACATT, GCTAAGAAACTGAAGAGACTT	4	62694, 6354, 59323, 10802	0.1873	1425	0.0813	1221	0	0	0	1
Smc1b	CCAGTCTCTGTTTAGACCCAT, CCATTGTTGTAGCCTCAGAAA, GCCTCAGTACATTAAGGCTAA, GCTCCATTCTTTGTATTAGAT, GCTGAAGAAGATGCACAATTT	5	10919, 78140, 82501, 22804, 319	0.1873	1426	0.0975	1442	1	1	1	1
Tnpo2	AGGAGTCAGTGGGACCTAAAT, CCAGTGCCTGTCAGATAAGAA, CCTTTGGCAAATACCAGCATA, GAACGTGGAGACCACCAGGTT, GCAACAGTTCTCAGAGCAGTT, GCACAGCATCATCCAGTACAT, GCTCAACTCAGAGGATTATAA, TGATCCCTATCCTCGTGAATG	8	34741, 4404, 82112, 18372, 6117, 26665, 12177, 73739	0.1873	1427	0.1162	1729	0	0	1	2
Fam192a	AGAAGAAGCTGGCCGTGAAAC, AGTATGAGGAGCAATTCAAAT, ATCTCAACAAGGTTGGAATTT, CATCAATGCTACAGGGAAGAT, CCAAACCTGTCCCATTGATAT, GCAATAGTGTGAAGAGACTGA, GCACCCTAGCTCCTGATATTA, GCTGTGAAACATAAGAGCTCA	8	61114, 20034, 2525, 7317, 24254, 6745, 47832, 53690	0.1874	1428	0.1163	1732	0	0	1	3
Sv2b	CACCAATATGAGACCATCATT, CCCAAATCTAAACCAAACTAA, CGCCACGATCAACTTTACCAT, GCCTGGATGATTCTCAAACAA, GCTCTGAAGTTCATGCCAGAA	5	40073, 54570, 6807, 8759, 9689	0.1874	1429	0.0976	1445	0	0	0	3
Ovol1	CCCACGTTACTGATGTCATAA, CCTCTGCACTTACTGTGGGAA, CTTTCTACGAACCAAGATGAA, GCAGCAGAAGTATGCATACAA, GCCTTCGAGACTCCAGCTATA	5	9424, 15774, 4815, 36231, 62801	0.1874	1430	0.0976	1447	0	0	1	2
Ripk2	CCAGATGAAAGACCATCCTTT, CGACAGTGAAAGAAATGATAT, GCATGATGTCACTCTCTCAAT, GCCAGTGTGAAGCATGATATA, GCTGCTAGATACGTCTGACAT	5	81768, 10613, 10970, 1249, 15034	0.1874	1431	0.0976	1444	0	0	1	1
Vmn1r171	CCCAATCAGAAGCTCAGAGTT, GCTGTAAGCTTCCCTACCTTT	2	13862, 13131	0.1874	1432	0.0328	474	0	0	0	0
Rnaseh2a	CCCAATGATCCCAAGACCAAA, CCCAGTTTGTACGGTTCAGTT, CGGGTCGTTGTCGTCTGAGTT, GCTCGATTACAACAGCACTTT, GCTGTGAAGAACTGGCAGTTT	5	6693, 8802, 73709, 91279, 26935	0.1875	1433	0.0976	1446	0	0	0	2
Gdf7	CCACTTCATGATGTCGCTTTA, CGACTGGATCATCGCGCCATT, CGCAAAGGAAAGAGAGTCTGT, GAAGCCGATGAGGTGGTGAAT, GCCATTAGACTACGAGGCATA	5	32708, 61473, 31406, 6512, 8871	0.1876	1434	0.0976	1443	0	0	0	2
Map3k12	ACCTGCACCTGCACAAGATTA, CAGAGTCGTTGCTACCTAAAC, CCACGAAATCGCCCATCATTC, CCCATCATTCCGACAGATCTT, CCTAAACTAGATGCAGCCCTA, CTACTCTAAGTGAGGCTTCTA, CTGGAGAGATTCCCTACAAAG, GCGTCAGTCACTATCTACATT, GCTGTGAAGAAGGTTCGAGAT, GGGCTTTGTGTCTACTCTAAG, TCCATGAAAGACACTCTTATT, TGGAACAGCAAACCACGAAAT	12	84083, 30805, 56840, 40137, 49602, 44535, 71363, 92411, 67760, 69669, 2747, 4532	0.1877	1435	0.1357	2000	0	0	2	2
Slc17a1	CCAGCATGAAATATGGGTCAA, CGGAAACTCTTCACCACACTA, GCACTTCTGTAACATTGCCAT, GCCTAGACTAATGTCTCTGAA, GCTCCCAGATATTATGGATTT	5	13134, 5656, 53798, 9169, 21131	0.1878	1436	0.0977	1448	0	0	0	2
Ndn	CCCGAAGAACGGATAGAAGAT, CCTGAGCCTCATCTATGTGAA, CGGAGACGTGAGGAAGATAAT, GCCAGAGTCTTCAAGAAAGAT, GCTGTGCTAAACTTGTGAAAT	5	84395, 57641, 9222, 5508, 25178	0.1879	1437	0.0978	1450	0	0	0	2
Cadm2	CCATCCATAATGCAGGACATT, GCCATGCAGGTGCTAGAAATT, GCCGAGTATGTCCTCATTGTT, GCTGATATAAGATGGTTCAAA, TGTTACACTGTGCTCCATATT	5	3456, 34738, 14332, 83491, 9907	0.1879	1438	0.0978	1449	0	0	1	2
Agmo	CATTGGTACATTTGAGCCATT, CCTTGAAGTGACCAGTTATAT, GCACTCTTATTATTTGGGATA	3	11534, 10949, 51492	0.1879	1439	0.0641	960	0	0	0	0
Slc5a9	CAGTACCTGAAGAAACGATTT, CCAGAGTTGGATGCTCCAATA, CGCGATCATCATTGTCGTAAT, CGTCGGAATACTGCGTATGAT, GCCCTGTAATCCTACCTCAAA	5	81720, 2738, 59493, 10149, 11744	0.1879	1440	0.0978	1452	0	0	1	1
Xlr5b	CAAGAACTCAGATGAAGTTAA, CTGAGACACTGTTAATCATTA, TTGGTGGTCAGCAGACTATTG	3	1145, 37064, 14806	0.188	1441	0.0641	959	0	0	1	1
Wnt8a	ACTGCAACTTTCAGTGGTGTT, CACGAGAGAGACATCCTTCAT, GATTGGCATCGAAGAGTGTAA, GCAGATGGGAAATTACCTAAA, GCGCAGTTACTCTTGGACTTA	5	91129, 86241, 28221, 9554, 4529	0.188	1442	0.0979	1454	0	0	1	2
Suz12	CCAGTAATGAATTTGAACCTA, CCTCAGGATATACATCGCCAA, CGAAACTTCATGCTTCATCTA, CTCATCGAAATTCCAGAACAA, GCTGTCTTAGAGATGGAGAAT	5	10651, 79557, 26999, 1245, 64118	0.188	1443	0.0979	1453	0	0	1	1
Cgrrf1	AGCCGGAAAGTGTACTTTCTA, CAGTTACCAAGTGATACTGAA, CCAAGTGATACTGAAATTGAA, CTATGAATACTCGCCGCTCTT, GCTTGGAGATCACTAATTCAT	5	59796, 87400, 9852, 63789, 3654	0.1881	1444	0.0979	1455	0	0	1	2
Dut	CGAGGATTACAGAGGAAACGT, CGGATTTCTTATCCAGACTTA, CGTGCTGTTTAACTTTGGGAA, GCCATCGTGAAGACAGACATT, GCTGGAAGTATCTCGCTGTTT	5	38059, 8465, 76698, 7825, 64810	0.1881	1445	0.0982	1456	0	0	0	2
Dnajc11	CAAGATGCTTTGTGACGACAA, CCCGCAGATTGAGATTAATAA, CGTTATGATGAGGAATATGAA, GCTGGACAATGAAGACTATTA	4	41005, 53323, 7840, 10376	0.1883	1446	0.0819	1229	0	0	0	1
Hmgn2	CCCTGCGAAGAAGGGAGAGAA, GATGCGAATAATCCTGCAGAA, GCATTGAATGAAGACTTCATT, GCCGGGAAGGATGCGAATAAT, TCTGCGAGGTTGTCTGCTAAA	5	10184, 28405, 2695, 89482, 45178	0.1883	1447	0.0983	1458	0	0	1	1
Fbxo28	CCAGATCATAGGCGAACAGAA, CCTGTGTCAGAAGCAAGTTAA, CGAGAACATCCTCAGCTTTAT, CGAGGTTGTCACTGTTGAATA, GGCGATGTGTTAAGGTTATTT, TCGAGCAGACCCAGATCATAG	6	20818, 56463, 1090, 26839, 85268, 9344	0.1883	1448	0.1094	1622	0	0	1	2
Elmo1	CCAAATCACAAGGTCTTACAT, CCATCTTATACGACTCAAATT, CCTCTCATTATATCCAGCTAT, CGACTCAAATTGCCAACTGAA, TCCATCTTATACGACTCAAAT	5	10395, 2100, 34067, 30304, 14085	0.1885	1449	0.0983	1457	0	0	1	1
Ube2o	CAAGGGTTTCATCAAGAGCAT, CCAACCCGAGAGAAGAAGTTT, CCAGAGGTTTACAAGTTTCTA, CCCTTCATGTATGGAGACTAT, CGCATTGGTAACACGGAGGAT, CGTCTGTTGAAGAAGCAAGTT	6	7700, 24263, 90211, 80511, 6054, 23296	0.1885	1450	0.1095	1623	0	0	0	2
Col6a2	CGGTACACTTGGGTCTTTCTA, GCACTCTATGCGTAAGCAGAA, GCAGTTCGTACCGCAGTTTAT, GCCACCTACCTCAATTCCTTT, GCTGGCAAGAATGGAACAGAT	5	56560, 16737, 3775, 68811, 9842	0.1886	1451	0.0983	1459	0	0	1	2
Olfr1419	CCACAATGAAATCTACCACTT, CTGTCTCTCCTATGGTTGCAT, GCTGTATCTAGGAAGTCTCAT, GCTTGGCTATTCCACCAACAT, GTATGGATGTTGCACCCTCAT	5	10991, 8112, 78946, 48471, 8399	0.1886	1452	0.0983	1461	0	0	0	2
Apoc3	CACCGGCTTCTGGGATTCTAA, CGGTCCAGGATGCGCTAAGTA, GAGCAAGTTTACTGACAAGTT, GTACAGGGCTACATGGAACAA	4	61030, 64868, 10419, 7793	0.1887	1453	0.0822	1233	0	0	0	1
H2afy	AGTTTGTGATCCACTGTAATA, CAGCTACTTTGTCTCCACGAT, CATCAAGAAAGGCCACCCTAA, GCCATAATCAATCCTACCAAT, GCCGAATATCCATCCTGAGTT, GGTAGCTGGAGCTGCTATTAG, GTTTGTGATCCACTGTAATAG, TCTAAGAAGAAGCAGGGAGAA	8	10968, 1231, 59762, 85705, 7234, 89585, 55951, 81537	0.1888	1454	0.1181	1763	0	0	1	2
Gpd1l	CAAGATCTTCTGTAAGGGCCA, CCACAAGATCTGCGATGAGAT, CTGCAGTGTATCAGATCTGCT, GAAATTCTCCTCCACCGTCAA, GCTTTCGCCAAGATCTTCTGT	5	38178, 10746, 77258, 48686, 1152	0.1891	1455	0.0989	1467	0	0	1	1
Olfr1506	CATGCACTTCTTTGGTGGCAT, CATGTCACTGTGGTTGTCATA, CCCAATATCATTGACCATTAT, CCTTGTAGGAATGGCATGGAT, CTCATTGGTCTGCTGATTGTT, CTGGGACTCTCTTCTAATCAA, GCACCCTGTGTCTTCATCTAT, GCAGAGAGTTTGCTTTGTGAT, GCCATTGTGCTTGGGAATCTT, GTGATGTGCTTCCTGTGCTTA, GTGCTTCCTGTGCTTAAACTT, GTGGTCCTCTTATCATCCTAT, TCATCTTGTTTCACCTGAGAA	13	86197, 47005, 940, 34616, 49428, 71149, 91267, 36025, 4814, 48825, 64631, 60461, 10922	0.1892	1456	0.1477	2180	0	1	2	2
Mpzl2	CAGGTGAAGAATCCACCTGAT, CGGGACAGATGTTCGGTTAAA, GCGCAAATCTAAGCACAATAA, GCGCTAACTGTGACGTGGAAT, GCTAACTGTGACGTGGAATTT	5	63172, 69410, 9831, 73801, 3922	0.1892	1457	0.0989	1468	0	0	1	2
Trim32	CCCAAGTTTGTCACCTGTGAT, GCATTGATAGCTTCGTGCTAA, GCCGCAAGGAAATTCTCCATT, GCTAGAATGTCCCATCTGCAT, GCTATCATCTGAGAAGATATT	5	13960, 9776, 66283, 4095, 88566	0.1893	1458	0.099	1469	0	0	1	2
Gigyf1	CGATGGCTTTGAAGATGACAA, CTTACGATGTCCATGATTATA, CTTCGACTCAGGGTCCAATTC, GAACTACAGGACAAGGAGTTT, GAATTGTTGCTGAAGCTGCTA	5	24754, 10750, 68179, 83851, 1197	0.1894	1459	0.0992	1472	0	0	1	1
Olfr1307	CCAAAGATGCTTTATGACTTA, CTTACACTCTCCCATGTACTT, GACTCACCAACTCTTGGAGTA, GCCATATGTAAGCCTCTCCAT	4	2872, 42026, 14840, 12114	0.1894	1460	0.0832	1249	0	0	1	1
Eif4h	CTATCTTTAAGGATCTCAGCA, GAGACAAAGACACAGACAAAT, GCTGTTAACAAGTGGTTTCTA, GCTTCATCCTTTGCTTTCTTT	4	1328, 12643, 51282, 41550	0.1897	1461	0.0832	1248	0	0	1	1
1500009L16Rik	ACACAACAGAAGACTCGATAA, ACGACAAGAGGAGAAACTATG, CAACATGGCGTCTAGTCAAAC, GGTCCAACAGGAGCAGTTAAA	4	12525, 28271, 1692, 47306	0.1897	1462	0.0833	1250	0	0	1	1
Tex11	CAGTGGAGAGTCATAATGATT, CCAGAAGTGTTAAGGTCCAAA, GCAGATGAAGTATGGAATATA, GCAGCTAAACTGTGTTATATT, GCCATAGCAGAAGTTGAGCAA	5	5179, 75944, 25967, 86497, 9439	0.1897	1463	0.0996	1476	0	0	0	2
Ubr3	CAATCCCTGGCCTCCGTATAA, CACCTCAGCATTGCATATATT, CCAGCAGAACTACAAAGACCT, GCACCAAAGATCAATCCATAA, GTCACGAGAAGTACCTTATAG, TACTTAAGAGAAGGCTATAAT, TTCATTACTGCAGCGTTATTT	7	62857, 39459, 34434, 3422, 84610, 49190, 7425	0.1897	1464	0.1123	1671	0	0	1	2
Slc12a7	AGGTGTAGTCCTGCGAGATAA, CGGCTGCATCTACAAGTACAT, CGTGACTACATCTTTCATTTA, GCATCTACTTCCCGTCTGTAA, GCTTGGAAGGAGGCAGATAAT, TGAACAAGCTGGCCAACTATA, TGGACGAAAGAGAAACTCATT, TTGTCGGCAATGGTAGGTATA	8	6964, 68619, 57243, 69247, 38863, 37892, 2162, 62647	0.1898	1465	0.1192	1773	0	0	1	2
Mfrp	CCAGACAATACAGCTCAAGAT, CCAGGACTTTAGAATGCAGTA, CCTGCCACATTAAACACCAAT, CGCCTCTTTCTTCCAGTATTT, CGTCTACTACTTTGCTGTGCA, CGTGGGTGATTACATTGGCAT, CTGCAATGGATGTGTGACTTA, GACAGTACCTTCTCTGGATTT, GCTAAATGAGCAGGGCCATTA, GCTGTAATCTTCAAGACGGAT	10	29515, 42216, 74669, 3659, 28302, 67489, 5317, 72394, 11886, 9794	0.1899	1466	0.1343	1990	0	0	1	3
Ahnak	GTGATTGTTCTTTGGAGCATT, GTGGTTCTGAACACGGTACAA, TGCCACCATCTACTTTGACAA, TGGACTGCAATGACCAGAATA, TGGCTTGAAGTTGCACCGTAA	5	62018, 40702, 9517, 56125, 5020	0.1901	1467	0.0999	1479	0	0	0	2
Adat2	CCCAATACTGGAAGACCGTTT, GACCTTCTACAAACAGGAGAA, GCTCCTAAAGACCTTCTACAA, GCTGAAATGGTGGCCATTGAT	4	12933, 61273, 561, 73429	0.1902	1468	0.0834	1254	0	1	1	1
Tlr5	AGATAACTCTCCACGCTTTAT, ATCACCCTTGTAGTCATAAAG, CCTGAGTAATAACTACCTTAA, CGGCTTTATCTTCTCCTTGAA, CGGGCAGTTTACCTGCTAATT, CGGTTACTTCAGAAATCTATA, GCTTTCAGAAACCTGCCCAAT, GTTGGCTGGTTTCTCGATAAA	8	27860, 1306, 89653, 49146, 70177, 20223, 85327, 7266	0.1902	1469	0.1199	1778	0	0	1	2
Camkk2	CCATGATTCGAAAGCGCTCAT, CCCTTTCATGGATGAACGAAT, CGGTGTAAGCAACGAGTTCAA, GCTGAATCAGTACACCCTGAA, GTATCCACTTGGGCATGGAAT	5	64055, 10904, 49680, 884, 92140	0.1903	1470	0.1002	1484	0	1	1	1
Zic5	CCATGTCCTAACCTGAAACAA, CCTGAAGTCATGCGGACGATA, GATCGAAAGAAACACTCCCAT, GCTTCAGAATATGACAGGCTT, GTAAGATTCGAGGCTGTGATA	5	10735, 16825, 55413, 50958, 1393	0.1903	1471	0.1002	1482	0	0	1	1
Lrrc4	CCACAATAACCTCTCATCTTT, CCACAATACATGACCATATTA, CCCACAATAACCTCTCATCTT, CGGGAGTATATCCCAACCAAT, CGGTATCTCAACCTCATGGAA	5	9612, 92182, 4782, 70063, 21108	0.1904	1472	0.1003	1487	0	0	1	2
Klhdc4	CGCAATGGTTTCACCATCACT, GACTACATCTACTACAGTGAT, GATGATGCAGTTCAAGACATT, GCAGAGAGTCAAGAAAGATGT, GCATAGCCATCTATGGAGGTT	5	10502, 2114, 86564, 20188, 88651	0.1904	1473	0.1003	1485	0	0	1	1
Vmn1r29	CATGCTGACTACAAGCACATA, CCAAAGAACTACATCATCAAA, CTTAAGTGAAACCAACCAGAT, GCATCTTCATAGCATCAGCTA, GCTCTACAGTAGTAACCAGAT, GCTGACTACAAGCACATACAT	6	65249, 57125, 9098, 65165, 9412, 2154	0.1904	1474	0.1111	1648	0	0	1	3
Gsto1	AGACCTACCGCGAGTACTTAA, AGAGGAGGGCATGGATAATTA, ATAAGCCCGAGTGGTTCTTTG, CCCTCACTGATTGAATATCAT, CCGCCTTTGATTGCAAGCTTT, CCGCGAGTACTTAAATCTCTA, CCTTCTATGGTTGATTATCTT, TACCCAGAGAAGAAGTTATTT, TCCGGCACGAAGTCATCAATA, TGGCTCCTTTCTCATAATTTG	10	64193, 70768, 23214, 590, 81156, 6358, 18039, 82641, 65164, 69962	0.1905	1475	0.1345	1992	0	1	1	2
Zfp617	AGCCTATACTACCTACAATAC, ATTATCACTTGACCGTCTAAA, CCCTGTGAAAGCCATGTGTAT, CCTGCATGATATAGGACAGAA, CGTTCCACTTCCCTTCACATA, GCCCTGTGAAAGCCATGTGTA	6	46405, 29085, 34525, 30695, 9071, 2320	0.191	1476	0.1116	1653	0	0	1	2
8030411F24Rik	CCCAGAAGAGAACACATACAA, CGCACAATTTGTAAGAAACAT, CTATATATAGTATTCTCCCGT, GCACTCATATATGGACCATTA, TCCAAGTAGATGCGAGACCTT	5	9966, 17689, 39380, 33133, 3832	0.191	1477	0.1006	1493	0	0	1	2
Socs7	CCCAGGTTGACAAGAACTCAA, CGAAAGTTCTACTACTATGAT, GACAAGAACTCAAAGTGCCTT, GCACTCCAAGAACGGGAAATT, GCTGTTGAACATGAAGGCATT	5	54392, 7410, 20268, 8778, 84812	0.1911	1478	0.1007	1494	0	0	0	2
Sgcg	AGCCAGCACTTTCAGATCAAT, CCATTTCAAGACCTTAGGTTA, CGCTGCCTATACCTATTCGTT, CTGACCCATTTCAAGACCTTA	4	9993, 9602, 18760, 50297	0.1912	1479	0.0844	1270	0	0	0	2
Usp18	CAGGTTCTGAAGCTGACTCAT, CCGTTGTTTGTCCAGCACGAT, GATGGCTGACTTTGGTCATTA, GCTGCATTTCAACGAGAATAA, GCTTCAAGTGTTCATGATGAA	5	63558, 20495, 9710, 4639, 73310	0.1913	1480	0.1009	1495	0	0	1	2
Zfp748	CCTACCTTACTCAGCACAAAT, CCTTTGAATGAGAAGAGACAA, GCCAGGTGTTTAGCTGTAATT, GCTCCCATAGAACTTTCTAAA	4	54739, 12089, 14454, 3354	0.1914	1481	0.0846	1273	0	0	1	1
Ott	AGCATACGTACATTCATATAA, ATATCTAGAAGCTGCTAATTC, CCTCTCAGATAGACCACACAA, CTCCATGCTAGATACACTATA, CTGAGCCAGAAATTGACAGAT, CTTAGGATTAAATGTCAGGAT, CTTCAACTGTATGAGTATTAC, CTTCCTAACAACTCAGGGATA, GAAGAATACAATGAGGAGAAT, GAGAGAGATAATCAAGTCCAA, GATATCTAGAAGCTGCTAATT, GCTTCATGAAAGAGAAAGATA, GGTCACGGAGAGATCGTTATC	13	32243, 37564, 4187, 19138, 40971, 30333, 69026, 81890, 47194, 69741, 62143, 3001, 29625	0.1915	1482	0.1504	2218	0	0	2	2
Slc5a4a	CATCAATAATGCTGCTGACAT, CCCATAGTAGAAGTATCTCAA, GCCTATTACAGCTTTGTGGTA, GCGTTTGAATCACATTCGTTT, GCTGATGATAGAACTGAAGAA	5	89565, 22762, 11123, 28419, 439	0.1915	1483	0.1009	1496	1	1	1	1
Arhgef25	ACCTAAGCGATGCAATGATAT, AGTGTTTGAAAGATCCCGATT, CCAACTTTAACCACAGGACAA, CGTGACTTTCTCAACGCATTA, GCATGATTCCTCAATGAATTT, GCATTACAGTCACCCATTGAA, GTGACTTTCTCAACGCATTAC, GTGGTGTACTGCCAGAATAAA, TGTCTTCCTGTTCGAGCAAAT	9	84266, 29060, 1960, 65564, 6368, 37419, 88452, 23866, 42105	0.1915	1484	0.1284	1902	0	0	1	2
Zmym1	AGGTCTGGACACGGTATTAAA, CAATCTTGTCTTACATCATAT, CCTATGATAGTGCCACAAATT, CGTGTGACAATTCATCTGTTT, GCAACTACTATATGCCAGATA, GCACTTAAAGTCACTGCAATT, GCAGCATGTGTCAGAAGACAT, GTTGAGCAGGAACTGGTAAAT, TTGCAACTTTGAGCTTAATTA	9	87421, 5428, 27217, 87496, 9303, 38565, 4785, 69339, 61229	0.1916	1485	0.1284	1904	0	0	1	3
Stard4	CCCGAGAGAGTTTGTTGATTT, CGGTTAATGACCTCCCTGGAT, GAGTCTTCTTACAGGCTATAT, GCCTCTATTTCAACTAAACTT, GCTATGTAAATAGGGCATTTA, GTCTATTCACATGGGTCAAAT, GTCTGATGTTGCCTCTATTTC, TATGGATGACGTGGTCAATAA, TTGGACTGGGACCGGTTAATG	9	28941, 73471, 6779, 746, 49033, 64838, 56079, 25689, 34488	0.1917	1486	0.1284	1903	0	1	1	2
Hagh	CGCTGGGACAGGGACTTCTAA, CTGTGTTCACAGGTGACACAT, GCTGCCATTCAAGAGAAACTA, GTGGTCATGAATACACCGTAA, TGGTCATGAATACACCGTAAA	5	27597, 82263, 6573, 9094, 51811	0.1917	1487	0.1009	1497	0	0	0	2
Slc35e3	CCTCACCTACACCCACTTTAA, CGGAGGATACATTCTATTTAA, GAAGAGATTCTCCGTCAGAAT, GCTGTCTGGAATAATCGCTTT	4	32602, 15189, 7472, 10739	0.1917	1488	0.0846	1274	0	0	0	1
Pthlh	CCAATTATTCCTGTCACTGTT, GAAACGCAGAGAACAGGAGAA, GATACCTAACTCAGGAAACCA, GTACAAAGAACAGCCACTCAA	4	66424, 10232, 64461, 8997	0.1918	1489	0.0846	1271	0	0	0	1
Morn2	CCTGAAACTAAAGCTCTACAT, GCAGTGGTGTGGTAACTTCCA, GCTGTGTATGAAGGACAGTTT, GTACACTGGAAATTTCAATGA, TGAAGGACAGTTTAAGGACAA	5	29158, 49548, 8924, 7115, 92156	0.1919	1490	0.1011	1499	0	0	0	2
Nusap1	CGATGGAAGAGACAAGAGCAA, CTGTGCTATATCTGAGAATAT, GCCACTGAAAGGACTTCTATT, GCTGTAAGAATTACTGTCATT	4	45148, 12678, 1705, 79695	0.192	1491	0.0848	1277	0	0	1	1
Trappc2	GACAGGAAAGTCCAGTTTCTT, GAGTGGTTTGTATCAGCCTTT, GCAGGGCATATGAGATTTATT, GCCGAAGATAATATGATCTTA	4	16276, 255, 13163, 20025	0.192	1492	0.0848	1276	1	1	1	1
Adad1	GCAGATAAACTTGGACCATAA, GCCAGTTTATATCAGCAGTAT, GCCCAGATTAAGTCACAGTTA, GCTGCAATGTTAAGTCGATTT, GTCACTTTATACAGCCAGTTT	5	70227, 36222, 2846, 41494, 10357	0.1921	1493	0.1012	1501	0	0	1	1
Klra33	CCCTGGCAGTTCATTGTGATA, CTAGACAATGATAACTGTGAT, CTTGCCTTGAACACAATGAAA	3	8518, 12692, 64800	0.1922	1494	0.0673	1014	0	0	0	1
Fam82b	GCAACAACATACCTAATACTT, GCAATCTGCATTAGTGATGTT, GCCACAGCCAAAGTTGAAGAA, GCGAGGTGATAGGAAATACAA	4	990, 87680, 12934, 67978	0.1922	1495	0.085	1279	0	1	1	1
Zfp131	CAGGTCTGTAACAGTGTATTT, CCAGGTCTGTAACAGTGTATT, CCATACAAATAAGAGTGCTAA, GCCAAGTGCATGATTCACAAA, GCCACTTAATTGAGTTCACAT	5	74559, 10753, 53504, 1691, 20965	0.1923	1496	0.1013	1503	0	0	1	1
Fam113a	CACTGTTTCGACGTCCTAGAT, CTTTGTACGAATGGACCAGGT, GATTGAGGACTGGTCAGAGAT, GCCACGTTGTGTTCTGAACAA	4	32499, 10283, 8958, 42473	0.1923	1497	0.085	1281	0	0	0	1
Sra1	CAGACTCACTTCACCTGACTT, GCACTGCTAGTGCAAGAACTT, GCTGGAGGGAAGTTGTCAATA, GCTTCCAACAGCCATCATAAT, GTCACACAAAGAAACAGGTAT	5	62553, 31, 88644, 83997, 11312	0.1924	1498	0.1014	1505	1	1	1	1
Kti12	CAGAGGAAATCCTGCCATCAA, CCAGTTTATTTCCTACACCAA, CCGTCGCCAGTTTATTTCCTA, CCTGAGTGTGTAGTTAGCATA, GCCAACATGTTTCTTCAGTAT	5	6123, 61912, 89339, 9284, 32324	0.1924	1499	0.1014	1504	0	0	0	2
Olfr1110	CCATGATTCATACAATAGGTT, CGACAGAAGTAATCCTCCTGT, GCTCAATTTCTTGTCAGAACA, GCTCCAAAGATGCTGCTCAAT	4	76548, 4748, 11694, 80653	0.1924	1500	0.0852	1286	0	0	1	1
Gm9839	CCTTGATATTACAGAGGACAT, CGAGGCATCAATCTCTTTGAA, CTCAATGATGAGGTCATCAAT, GAACTCATCTTGGTGCCTATT, GAAGTCTATCTGTGAGACCAT, GCAAATCACCAGAGGAGATAT, GCCTGGTGGTAATCGATTTAA, TGTGAGACCATCTTCCAATAT	8	2158, 54639, 7074, 8580, 21923, 48304, 76772, 29186	0.1925	1501	0.1223	1812	0	0	1	3
Snrnp48	CAGTACTTGAGATAGGTAAAT, CCCAAATCATCACTAACAAAG, CCGAGGATGAAATCGCCATAT, CTGGGAAAGATGGTGATTGTT, GAGCTAAGAATGTTCACATAA, GCATGCCCAAATCATCACTAA, GCCGAGGATGAAATCGCCATA, GCGGTAGGTATGTTTAAGTTA, GCTGCTAAAGTCAATCAAGAT, TCGCCTTGCCCTGTATGATTT	10	25345, 3382, 48147, 68216, 9157, 49936, 59764, 60898, 63160, 5497	0.1925	1502	0.1368	2026	0	0	1	3
Pcgf2	ACCCTCTCCTTCCGCAGCCAT, CGCTACTTGGAGACCAACAAA, GCAAAGTTCCTCCGCAACAAA, GCTGAGCATCAGATCAGACAA, TGACTGTTAATGGCGCTCCTT	5	89743, 89868, 10012, 3952, 63592	0.1925	1503	0.1018	1506	0	0	1	1
Olfr1434	CTGTTAAATCTATCCTGCAAT, GCTCCACTTCTGTGGATCTAA, GCTGTTAAATCTATCCTGCAA	3	13533, 36940, 6070	0.1925	1504	0.0674	1015	0	0	0	1
Ndufs5	ACCGGCACTTTATGTTCCTAA, CGAATGCATGATATCAAGAAA, GAGTGCAAGATAGAGTTCGAT, GAGTGCTTGCTTCGGTACAAA, GCTAATGAAAGAGGGCAAATA	5	73670, 13638, 23238, 8196, 8600	0.1925	1505	0.1018	1507	0	0	0	2
Ptprs	CCACGGCCATATTGGTAAGTT, CCAGCTTTATCGACGGCTATA, CCTTCCTCATTCCCTTCTGAT, CGAAATCACAATTCATGCAAA, GCAGAACTACTTCATTGTGAT	5	87370, 51666, 14510, 955, 11018	0.1926	1506	0.1019	1508	0	1	1	1
Rdh12	CCATATTCTAAGACAACAGAT, CCATCCATCAGGAAGTTCTTT, CCTGTCTGACACCAAATCCAT, GCGGCTCTTCTCACCCTTCTT, GCTAGTGAAATCCGAGCAGAT	5	21177, 74814, 4835, 9728, 57052	0.1927	1507	0.102	1509	0	0	1	2
Cd247	CCAATCCTGTGCCAGCGTCTT, CCTCTTCATCTACGGAGTCAT, CGTATACAATGCACTGCAGAA, CTCTACAATGAGCTCAATCTA, GCTAGATGGAATCCTCTTCAT	5	43128, 32794, 46965, 4869, 9719	0.1927	1508	0.1021	1511	0	0	1	2
Mob3b	CAAACGTGGAGCTACCATATA, CATCACTTTGACCGTGTCATT, CCAGTACATGAATCTGCTTAT, GCAGGATGACCTCAAGTATAA, TAACTTCTCTGTCACTTATTT, TCATCACTTTGACCGTGTCAT, TGGACTTCTTCAATCGCATTA	7	86024, 6848, 47518, 17387, 5567, 55146, 38030	0.1928	1509	0.1162	1730	0	0	0	2
Sc5d	CCCAGCTTGAAGTGTGTCATT, CGCATACATAAACCACATCAT, GACTATAACTATGGACAGTAT, GCATACATAAACCACATCATA, GCTGGATTCATCTCATGGTTA	5	75443, 8531, 8467, 43127, 74052	0.1929	1510	0.1023	1516	0	0	0	2
1110020G09Rik	ACTACTTGAGCGACATCATAT, CGACAAGGAAATCTGACTCTT, CGACATCATATTCACACCAAA, CGCAGGCTGTTGAAGATGTTT, CTCTTTAGAGGCAGGTTAAAT, GCCGAGCCTTTAACATCGAAA, GCTGTAGCAGTGGACAATTTA, TTCACCGTGAGACGGACTAAA	8	56403, 88031, 60448, 6419, 43674, 77311, 4182, 34251	0.193	1511	0.1228	1817	0	0	1	2
Fos	CACTACTTACACGTCTTCCTT, CCGAAGGGAACGGAATAAGAT, CCGTCTCTAGTGCCAACTTTA, CCTGTCAACACACAGGACTTT, GACCTTACCTGTTCGTGAAAC, GCGGAGACAGATCAACTTGAA	6	42208, 78396, 8864, 87399, 16614, 3248	0.193	1512	0.1136	1689	0	0	1	2
Hiat1	CCCTAAACATACATTTCTGAT, CCTCAACACTTGAATACATAA, CCTTGGCATTCTGTCCATTAT, CGGAACACACTAATTTAAGTT, GCTGATCTGTATCACGGTGTT	5	49181, 2672, 64601, 89528, 10483	0.1932	1513	0.1026	1521	0	0	1	1
Sla	AGACTGACTCCAACTCGAAAT, AGGAGAGAAACTGCGTGTAAT, CATTATCGAATCTTCCGTCTT, CCAGAAGACCTTTGACTGGAA, CCCAGTACTTTGAAGATTAAT, GAGAGAAACTGCGTGTAATTT, GAGTGAAACAAAGAAAGGTTT, GCATTATCGAATCTTCCGTCT, TGAAGTGGCTGATGGTCTATG	9	20305, 6464, 1868, 16951, 20790, 89046, 43165, 26517, 31132	0.1933	1514	0.1307	1937	0	0	1	2
Mrpl49	CCTTGCTTTCATAAAGTACAA, GAGTCTGTGGATGAATACCAA, GCACATACAAATGCGCCTGTA, GCAGATATTAACTGCTGTATA, GCTACTTTGATGAGCAACTTA	5	10500, 2632, 32213, 91625, 15386	0.1933	1515	0.1027	1522	0	0	1	1
Gm5570	CACAGATTGTTCCAGCCCTAA, GTGTATTTAAACCTTGGGCCT	2	16895, 5757	0.1933	1516	0.0354	528	0	0	0	1
Tgfbrap1	CAACTCTATAACCCTGGTTAA, CGCAGGACTGTCCAAATGTTT, GAAGAGTGATTGTTGCCACAA, GTCCACTTGTTGAAAGAGAAA, TGAACCATCATGCCAGGGAAT	5	5663, 19935, 45016, 83680, 9495	0.1934	1517	0.1029	1524	0	0	0	2
Tbc1d2b	CCAGGTTGAAAGTAAATACTT, GCAAGATTCGATGTCCATATT, GCAGTAAAGGAGTCGCTAGTT, GCCCAGTGATTGGAAACGAAA, GCGTTACTTCACTCGGACTAT	5	82490, 20680, 20079, 4903, 9750	0.1934	1518	0.1029	1523	0	0	1	2
Zdhhc18	AGACGGAACTACCGCTTCTTT, CCTGACAACTAACGAAGATAT, GACAACTGTGTGGAACGGTTT, GCAGACAGTGAAACTCAAGTA, TGACCCTTCTTTCTCAAGGAA	5	56836, 33111, 10378, 3020, 90118	0.1934	1519	0.1029	1525	0	0	1	1
Crebbp	CCGGGAATGAAGTCAAGGTTT, CCTCACAATCAACATCTCCTT, CGCGAATGACAACACAGATTT, CGGAGTCATCTAGTCCATAAA	4	27784, 64963, 12435, 2817	0.1938	1520	0.0866	1307	0	0	1	1
Mgll	CCATGAAGTAAACTCGTGGGT, CGTTATGATGAGCTGGCTCAT, GACCGGCTTTGCGACAGCAAA, GCATCGACTTTGAAGGTCCTT, GCCCTCATCTTTGTGTCCCAT	5	1837, 10801, 58501, 50734, 21606	0.1939	1521	0.1033	1527	0	0	1	1
Prss16	CCCAAACAAGGGTGGTTAGAA, CCCAGATAAGAACCTGGCTTA, CCCTTCTAATTCCTAGTGCTT, GCCCAGACAAACTCCTATTAT, GCCTCCTCAATGTGTCTTCTT	5	55981, 16887, 5030, 9740, 81976	0.194	1522	0.1033	1530	0	0	0	2
Gli3	CCAATGAGAAACCGTATGTAT, CCACATAATCTGTGGAAGGTT, CCTTGGTTACAATCCTCAATA, GATGCTAACTTGAATGATGAA, GCAGAATTATTCCGGTCAGTT	5	82326, 10539, 2640, 54468, 23673	0.194	1523	0.1033	1529	0	0	1	1
Anxa10	CCACCATCTTATGATGCTCAT, GCGTGCTGTATTCACACTGAA, GTTCGTTGTATCCAGGACAAA, TCAGTTCTGAAGGAACAACTT	4	11081, 65168, 82780, 6921	0.194	1524	0.0868	1309	0	0	0	1
Bcat2	CAAGGTCACTATGAAGGAATT, CCACATACCTACCATGGAGAA, CCCTTCCAGAACCTCACGCTA, GAGACTCAAGAGAAGTGCAAT, GCCTGGAGTAGTTCGACAAAG, TGGCTTCTATGTGGGTCCAAA	6	8030, 17741, 35788, 5915, 14125, 35242	0.194	1525	0.1149	1708	0	0	0	2
Dag1	CCACCTCATCAACCTTTCTTT, CCGTTATTACTCCTCCAACAA, CCTGCTCATTGCTGGAATCAT, CGCCTTCAACTGATTCGTCAA, CGCTCATTTCGAGTGAGCATT	5	10776, 62992, 38415, 10478, 2855	0.1942	1526	0.1033	1528	0	0	1	1
BC048562	CAATACCACCTACCAACACAA, CAGCAGTGTTCCTACAGAGAT, CCAGTTACTGAAACACTGCCT, CTATGCCAATACCACCTACCA	4	6788, 27463, 11143, 63387	0.1943	1527	0.0869	1310	0	0	0	1
Cytip	CCTCATTAAACATTCCACATA, CCTTGTTAGCTGTGCTTGTAT, GAGCAATTACTCAAGCGTGTT, GATGGAAGACAACCGAAGGAT, GCAGTGACCTTTAAGTTCTTA	5	33041, 19496, 10139, 3891, 57292	0.1943	1528	0.1033	1526	0	0	1	1
Rnaseh2c	ACGGGAAACAGCGTATTCACC, CAGCTTCAGCCATTTCACCTT, CCCGGTAGATCGCTTCTTCAC, GATAGGGAAACTGAACTTCTC, GCTTCAGCCATTTCACCTTGT, GTCCAGATGCCAAAGTGCATA, TCCAGATGCCAAAGTGCATAG	7	70091, 51963, 71085, 6742, 69910, 23660, 6099	0.1944	1529	0.1174	1749	0	0	0	2
Rps25	AGTAAATAAATCTGGTGGCAA, CCCAAGTAATTTACACCAGAA, CCTGTTCGACAAAGCGACATA, CGGGACAAGTTGAACAATCTT, GCCATGAAGTCAGATGCAATT	5	77229, 4465, 73123, 68171, 9961	0.1945	1530	0.1035	1532	0	0	1	2
Rqcd1	GAAGATCTATCAGTGGATCAA, GCACTGTTTACAAGTCTGTTA, GCTGAGCTGAAGTCTTTCATT, GTCTGGAAGTGAACTCTCTAA, TGACACTGGTTTAGCTTATAT, TGGCATTCATTTGGTACTATT	6	7255, 8133, 25410, 7609, 9518, 69355	0.1945	1531	0.1153	1715	0	0	0	4
Egr1	CACTCCACTATCCACTATTAA, CATCGCTCTGAATAATGAGAA, CCCAGGACTTAAAGGCTCTTA, CCTGACTATCTGTTTCCACAA, CTACTCCCAACACTGACATTT, GACTTGATTTGCATGGTATTG, GATAATTTGCATACTCTATTG, GCTCTTAATACCACCTACCAA, GGACAATTGAAATTTGCTAAA, GTTGCCTCCCATCACCTATAC	10	823, 6427, 39911, 65624, 49969, 82728, 9091, 35569, 27198, 75774	0.1947	1532	0.1402	2076	0	1	1	3
Igf2	CAAAGAGTTCAGAGAGGCCAA, CTGATCGTGTTACCACCCAAA, GCTTCTACTTCAGCAGGCCTT, GCTTGTTGACACGCTTCAGTT, GTGGGCAAGTTCTTCCAATAT	5	9123, 56123, 88525, 18535, 7022	0.1948	1533	0.1035	1534	0	0	0	2
Tbl1xr1	CCTTTGGTATAGAGAGCCATA, CGTAGATAAGACCACCATCAT, GCACATACCATCGCAAATAAT, GCATCCTTTGATTCTACAGTT, GCATGAAGTAAGGGAGTGAAT, GCTGTCCTCGAACTCAGAAAT	6	88540, 2423, 42951, 15472, 9232, 91737	0.1948	1534	0.1157	1726	0	0	1	2
Tox3	AGGAATCTGGTGGAGCAAGAT, CAGGCTGCAATTAAGGGTCAA, CTTAACCATGAGACTACCCAT, GAGGCAAACAACGCCTTCTTT, GCCCATTATGTTCATTCCAAT	5	10159, 70429, 35662, 10440, 3933	0.1949	1535	0.1037	1536	0	0	1	1
Mxd3	AGAGAGGCAGAGCACGGTTAT, CCACATGTTGAAGAGACTAAA, GATGTGGAGAGCCTGGTGTTT, GTACCCGATACACTACACTAA, TCAGACTCAGACCAAGAGGAT, TGTACCCGATACACTACACTA	6	5270, 8289, 61994, 92263, 29356, 82155	0.1949	1536	0.1157	1725	0	0	0	2
Ddx39b	CCTGAACCTCAAACACATTAA, CGCAAGTTCATGCAAGATCCT, GCCATCACATTTGTGTCAGAT, GCGTGTGAACATTGCTTTCAA, TCTAGCCCTGGCTCGAAATAA, TGCCGCAAGTTCATGCAAGAT, TGTGAACATTGCTTTCAACTA	7	8287, 1552, 48089, 63808, 23702, 80140, 50094	0.195	1537	0.1183	1765	0	0	1	2
Tmem108	CCATCACAATGGACTACTTCA, CTTCCAAATCTACAAGGGTAA, GAACAACCTGAGCTACTGGAA, GCCAGGCTTTATCAGATCCAA, GCTACTCTGGAAACTACAGTA	5	28035, 84856, 9214, 8896, 7756	0.1951	1538	0.104	1538	0	0	0	3
Sult1c2	CAAACAACTGTAAGTTCCTTT, CCAAGGATATTAAGGACCCAT, GCAGATCATGTCCAATGTATA, GCAGTTTATGGGCAAGAATTT, TGGTGGGAAATTCGAGACAAA	5	81691, 9896, 29127, 4757, 67419	0.1951	1539	0.104	1539	0	0	1	2
Cenpm	ACGTTTGCTGCCAGTTCCAAA, CAGCAAATACAGTCTCCAGAA, CCAAGGAGCTGTGAGCATTAC, CCTGATTGTGTTTGTGATTAA, CTGATTGTGTTTGTGATTAAC, GCAAATACAGTCTCCAGAAAG, GCGGAGTCGATGCTCAAAGAT, GTGATTAACCTGCACAGCAAA, TCCAAGGAGCTGTGAGCATTA, TGCACCTGTCTAACATCATAA	10	26976, 5372, 54167, 51029, 77855, 4036, 59996, 36536, 88980, 68301	0.1952	1540	0.1414	2092	0	0	1	2
Cd300ld	CAGAGATCATGTGATATTCTT, CTGATGGTCTTTGTGGAGTTA, GCAGTGCAGATATTCCTCATA, GCCAGTTGATTGACCAAATAT	4	87258, 84830, 13374, 285	0.1952	1541	0.0876	1319	1	1	1	1
Cacna1c	CCACGGTGAATCAGGAGATAT, CCAGAGACAATGTGTGGAATA, CGCCATGAATATACTCAACAT, GCCCAGTAACTTGTTCCAATT, GCGTGCATAAGCATTGTTGAA	5	86496, 9027, 90865, 68955, 7390	0.1952	1542	0.1041	1542	0	0	0	2
Katnal1	ACGATCTTCATCGACGAAATT, CAGCACTTTAGAAAGCTTTAA, CCACGATCTTCATCGACGAAA, CCCTCAAATCAGGCGTCCAAA, GCAGGAACTCTTGGAAGAATA	5	7518, 8985, 23182, 39303, 34708	0.1952	1543	0.1041	1544	0	0	0	2
Hic1	ACCCACTGCGCTGAGCTATAT, AGCAGACGGCGACGACTATAA, ATAATGTGAAGTTCCTCATTT, CCCGAATTGGCGCGATATAAC, CCTCTACCCGCTGGCTAAATT, CGGAACCATGACACGCCATAT, CGGGACTGATAATGTGAAGTT, CTGGGTAGTTATGGCGATGAA, GAGGAAGAAGAGGCGTTATAT, GCGCAACCTCATCAGCCATAT, GCTGGCTAAATTCACTGCTGA, TGATATCAGCTTTGACCAAAG, TGGCGCGATATAACATATAAA	13	91708, 61246, 1994, 85870, 42891, 63080, 70899, 71241, 47485, 24032, 39284, 4627, 51983	0.1953	1544	0.1557	2280	0	0	2	2
Sdhd	AGCACATTCACCTGTCACCAA, CCCGCTTATGTGTCAGCATTT, GCTGGGCTTTGCTACTTCAAT, GTGGTTACCGACTACGTTCAT, TGCTACTTCAATTACCACGAT	5	48853, 84778, 28518, 9050, 7339	0.1953	1545	0.1041	1540	0	0	0	2
Rspo1	AGAAGTCAACGGTTGCCTCAA, CACTCACATCAGTAGGACCTA, CCCATCCAACTATCCATCCAT, GACATGAACAAATGCATCAAA, TGGATACTTTGATGCCCGCAA	5	11175, 30753, 32691, 971, 75867	0.1954	1546	0.1041	1541	0	1	1	1
Higd2a	CGCCATGGAAACCATTACAAA, GAGAACCCAATGGTGCCTATA, GCACAGGGTTTCACGGTCGTA, GCATCTGCTATGAAGTCTCAA, GTTAGCGGCATCTGCTATGAA	5	32669, 4541, 9987, 31736, 64726	0.1954	1547	0.1042	1545	0	0	1	2
Tm9sf1	CCATTGGTTGTCCATCATCAA, CCCTCAGGAAACTTACCACTA, CGTGGAGCTGTACTACATCTT, CTGATGAATTGCTGGGCCTTA, GCCACAGAACTCTGGCTCTTT	5	69887, 37916, 67882, 9029, 7439	0.1955	1548	0.1043	1547	0	0	0	2
Gzmm	CCCAGCAAGAATGTCAAACCA, CCTGGCTACAACCACAAATAT, CGCCCATACATGGCCTCTCTA, GCAACAGATTTGAGACCCAGA, GCTGGATACCCAAATGTGTAA	5	91197, 56170, 21543, 8913, 7789	0.1955	1549	0.1043	1548	0	0	0	2
Odf1	CAAGTCAAAGTGCGCGTGAAA, CAGTGTTAGGAGGGACATAAA, CGCAGTTTAGAGAGACTCAGA, CTGCCTGTGTGACTTATACAT, GCAGTTTAGAGAGACTCAGAA	5	10901, 25430, 1828, 29783, 26296	0.1956	1550	0.1044	1550	0	0	1	1
Cpne1	CCTACAGGAGTCAACGAGTAT, CCTAGGGAAATCTGACCCATT, GACAAGCTATTTCCTGCATTT, GCAGATAGAATACCACTTTGA, GCCTGGAGTATAGTCTTGATT	5	5538, 33388, 27973, 42231, 9665	0.1956	1551	0.1044	1549	0	0	0	2
LOC100047082	CCAGACAATAGACATCTGTAA, CCTGAGTACATGCAAGTCAAT, CCTGTGTAGATCGCAATGAAT, CGTGTTTCACTCAAGTCAATA, CGTTAATGAATGCGAGGTGTT, GCCTGAGTACATGCAAGTCAA	6	83001, 5662, 35491, 54872, 61159, 8194	0.1956	1552	0.1169	1744	0	0	0	2
4930432E11Rik	CAAAGTCAACTAGCAGAGCTT, CCAGGAAGATTGTTAGAAGAA, CCAGGTAGAGACATTGCTGAA, CCGGTTACTTAAAGACTTCTT, CGTGGGAAACTCATAACTCAT, CTGCTAGAGAGTATCAGAGAA, GAGGACTCACAGAAACTGATT, GCAGACATACATCCACCACAA, GCTCTCATATACACAACCAAA, GCTTCTCAAACACTTCGAGGT	10	57329, 34621, 5329, 13604, 83702, 33574, 4232, 47291, 60195, 46939	0.1958	1553	0.1421	2100	0	0	1	2
Olfr644	CCCATGTACTACTTCCTATCT, CCTACAGTTCTGGGAGTGTTT, CCTTGTGGTGACACTTCCATT, GCCATGAGCTTTGATCGCTAT, GTGGTGACACTTCCATTAATA	5	36039, 81680, 20084, 10385, 3427	0.1959	1554	0.1046	1552	0	0	1	1
Abtb1	CAGACATACAGTGCCATTGAA, CCAGACATACAGTGCCATTGA, CGCAGCAAGATGGCATTACAA, CTTCTGGATGACCACTTTCAA, GCGGGATTACTATGACGATTT	5	10214, 43775, 36325, 3944, 60960	0.1959	1555	0.1046	1551	0	0	1	1
Snupn	CAGAAATCCAAGCGGTTGGAT, CCCTAGCAAGAAGTTACCAAA, GAGGACAGTGATGATAGCCAT, GCTCCAACAGATTATTGAGCA	4	11969, 4672, 79026, 68508	0.196	1556	0.0889	1335	0	0	1	1
Slc7a6	CACAGCTCTTTGTAGTTTAAA, CCCGGAGACCACTCTTTATTA, GCACACGAGTACAAGACACAT, GCACTTTCAGGACGCCTTTAA, GCCAAAGCAATAGGCGTGAAT, GCCATCATTATCATGGGCCTT, GCTAGATGTAACTGAAGAGAA, GTAACTGACATGGGATCAATG, TCAGGTTGGGACACCCTTAAT, TGATCCATATTGAGCGCTTTA	10	1520, 29182, 24686, 17171, 45133, 41927, 57700, 76085, 8628, 6240	0.196	1557	0.1425	2106	0	0	1	3
Olfr531	CACTGTCATCTACACCTACAT, CCTCAGCTTCCTATGCCTATA, CCTGCTCATTATGGTGACAAT, GCTGCCCTCTGCATTATAGTA	4	10864, 7990, 87990, 36874	0.1961	1558	0.0889	1334	0	0	0	1
Gys1	CAGCAAGGGTTGTAAGGTGTA, CCAGACCACTTCACCTATGAA, CCCATGTCTTCACTACCGTAT, CCGGACCAATAATTTCAACGT, CCTGGACTTCAACCTAGACAA, GCAAGGGTTGTAAGGTGTATT, GCCAATACAGTCAAGGAGAAA, GCCCATGTCTTCACTACCGTA, GCGGTGATACACATCTGTAAT, GCTTCTTCGTTTGATCCTATA	10	6350, 16273, 92394, 46038, 57137, 1192, 81531, 35465, 24124, 55452	0.1961	1559	0.1425	2109	0	0	1	2
Sars2	CCCATCCCAGATTTACAATAT, CCTGCCAGTGAATTATTGTCA, CCTTCCTGCTTATCGCAAGTT, GCAAACCAAGACAGTGACCAA, GCTTATCGCAAGTTCGACATT	5	7181, 40152, 72118, 18866, 9152	0.1962	1560	0.1052	1562	0	0	0	2
Rac1	CCAATGTTATGGTAGATGGAA, CGAGGACTCAAGACAGTGTTT, CGCAGACAGACGTGTTCTTAA, CTCATCAGTTACACGACCAAT, GCTTGATCTTAGGGATGATAA	5	85414, 73800, 21060, 9064, 7446	0.1962	1561	0.1052	1560	0	0	0	2
Slc16a7	CGCACCTGAGTTGTGATGAAA, CGCTTGGATATCGTCCATCAT, CGTGTTAGTATCAGGTACTTA, GCTGGTAAATTGCTTGATATA, GTCTCCTCTTTGAATGCCTTA	5	5099, 9848, 27379, 15263, 60457	0.1962	1562	0.1052	1561	0	0	0	2
1520401A03Rik	GATTCGGAAACGGGAATGGAT, GTTCAGCAATGGGAATGGAAT	2	7799, 16497	0.1962	1563	0.0366	541	0	0	0	1
LOC100048483	AGAGCTACAAGAAGCGGGAGT, CCATTGGGCTCACTTCCTGCT, CTGCTTCGTGTGTTGTCTTCT	3	10895, 13673, 12228	0.1963	1564	0.0705	1059	0	0	0	0
1700007B14Rik	GAAAGATCTGCAACCTATAAA, GGAGCCACATGTGTCGAATAT, TCAGCACAGTGCTCCATTAAA, TTCGTATCATGGGCCAAATTT, TTGCTGACAGGACGCTTTATG	5	86458, 11249, 934, 50230, 82595	0.1964	1565	0.1053	1565	0	1	1	1
Pcsk7	AGTTATGACCTCAACTCTAAT, CAGTGTCTTCTGGACTATTTA, CGCAGTATCCACTTCAATGAT, CGGGATGTACAGCACATAATT, GCTGGAATTAGCCATCTTCTT, TATGCAGCAAGTCCCTATATA	6	22290, 34302, 8867, 60039, 3780, 46532	0.1965	1566	0.1174	1747	0	0	1	2
Gm2904	GCAGTGTTGAGCTGAAATGTA, GCTCTGATTTGTGCTTTGAAA	2	18584, 1648	0.1966	1567	0.0367	543	0	0	1	1
Frmd4a	CCCACTATGTTCATTCCACAA, CCTGTAGAAGAGAACAAGAAA, CTTCTGTGTCAGATTCTACAT, GTTCACTATTATGCAGTGAAA	4	4507, 24033, 12067, 33054	0.1967	1568	0.0891	1336	0	0	1	1
Timd4	CATTGTAATTTCCGTTTAAAG, CCATCTTTATTTAGGATTAAG, CCTGCATCCAATCACTCTCAA, CCTTCACTACAGAATCAGAAA, GCAAAGGTTCATGTCCCAATT, GCTGCCTCAGAGGATACAATA, TTAACAACAAGTGAGTCTTTG	7	8155, 7643, 20706, 61718, 82847, 22969, 3715	0.1967	1569	0.1196	1774	0	0	1	3
Ptch1	CCGAATATCCAGCACCTACTT, CCTGCAATTCTCAGCATGGAT, CCTGTCCTCTTATCCTTCTTT, GCAATGGAAGTTGGAACATTT, GCTCCTTGATTGGCATTTCTT	5	32099, 10635, 30740, 2839, 79083	0.1968	1570	0.1056	1570	0	0	1	1
1190007F08Rik	GGAAGAAGCCTCATGCTATAG, GGCCCTCTTCTGGATCATCTT, TAACGACTGTGGCTCCTATTT, TACGTGCACAAGTGCAAATAA, TGAAGTCAGCATGACCGCCAT	5	50443, 21216, 4917, 38160, 9954	0.197	1571	0.1056	1569	0	0	1	2
Pitpnc1	CAGCTGTATATGATCAGCAAA, CCGAAATTCTCCATCCACATA, GCCGAAATTCTCCATCCACAT, GCGCCAGAATTTCTGTCCATT, GTCCGAGACATCTTGCTGATT	5	14126, 45806, 6691, 77551, 9364	0.197	1572	0.1056	1572	0	0	0	2
Tmem146	GACATAGCTGACAAGACACTT, GAGTATGTCATCTCGGAGATA, GCCAAAGAAATGGGATCTATA	3	9486, 90570, 12761	0.1971	1573	0.0708	1062	0	0	0	1
Dmrt3	CAGTCCATCTACACAGAGGAT, CCACTAATACTGTATACTCTT, CCTCGGATTCTAGAATACTCA, GCGGCCATATCTTTGAACACA	4	44187, 2377, 85953, 12809	0.1971	1574	0.0892	1340	0	0	1	1
Itga9	CCCAGAAGAATCAGACAGTTT, CCGCACCATCAACCTATACAT, GCAAGAATGTACCAGGAGAAA, GCGATTATGAACAGACGGTAT, GCTGTTACCTTGTGGTATAAT	5	9637, 5902, 49614, 29071, 22684	0.1972	1575	0.1059	1576	0	0	0	2
Nxph1	ACCGTGATTGATGCTAAAGAT, CCACTGGTCAAGGGAATGTAT, CCGTGATTGATGCTAAAGATT, GAGCAGCAAATCCACGCTAAA	4	62009, 9323, 15041, 10507	0.1973	1576	0.0894	1343	0	0	0	1
Ugdh	ATACTAGCTATATGGGTATTA, CCCACCTAACAAGAAACCCAA, CCTATTTATGAGCCTGGATTA, CCTGGTGAGATTCCGAAGTTT, CGGATCATAGATAGCCTGTTT, CTGGTGAGATTCCGAAGTTTA, GAGAAGCCGATCTAGTATTTA, GCATATTTGATGCCAACACAA, GGATTACGAACGGATTCATAA, TCAACGAGGCAAGGATCAATG	10	14265, 17592, 3790, 51724, 89516, 67813, 13410, 5528, 63577, 11730	0.1973	1577	0.1444	2132	0	0	1	2
C1ql3	CCACGGAGGAAACAACAACAA, CCTGTGATCTTGCTGCTTTAT, CGTGGTAACCAATCTCGGAAA, GCACATTCTCTGGATTTATTA, GCTAGTGCAATTGCTCAAGAT	5	80668, 85709, 73545, 7153, 9231	0.1974	1578	0.1063	1579	0	0	0	2
Gria3	CCGTGTGATACGATGAAAGTT, CCTGGAGTCAAGGAATTGATA, CGCTACATACAGAGAAGGCTA, CGTAGGACAAATTATACCATT, GAGCCAGATTTCACTCTCCTT	5	70935, 53213, 31392, 9327, 6869	0.1974	1579	0.1063	1581	0	0	0	2
Cops7a	CAAAGTCAAGTGTATCCCATA, CAGAAGAATAAGCTTCGACAT, CCAAAGTCAAGTGTATCCCAT, GAACTGCTGGATATGCCTAAT, GCAGGTCATGTTCTGTTGGTA, GGACCTATGCGGACTACTTAG, TCAGCGGCTAGAGGTTGATTA	7	6635, 6702, 79718, 28012, 63621, 49304, 73572	0.1974	1580	0.1205	1785	0	0	0	2
Il1b	ATCAACCAACAAGTGATATTC, CAACAGTGGTCAGGACATAAT, CCACCTCAATGGACAGAATAT, CCTCAAAGGAAAGAATCTATA, CGGTTTGTCTTCAACAAGATA, GCAACCACTTACCTATTTATT, GCAGCACATCAACAAGAGCTT, GGGCAACCACTTACCTATTTA	8	36118, 3746, 6746, 88385, 63604, 89240, 91531, 38354	0.1974	1581	0.1286	1905	0	0	1	2
F830005K03Rik	CAGATCTTTGTGGAGAGACAT, CCACACAAAGATAATACTGTT, CTTATGTGCAACTCATAACAA, GCTGTAATGAAAGAGACAATT, GTTCCTTCTAGGTTTGCTCTT	5	60117, 62053, 13050, 3133, 10577	0.1975	1582	0.1063	1580	0	0	1	1
Dnajb12	CAAGTTCCATCCAGACAAGAA, CGACCAGTTTGGTGATGACAA, GCCACAGTGATGGACTGTATA, GTACCACAGAGCACAGAAGAT, GTGGAACGGAATGTAGAGGAT	5	61402, 7309, 20521, 58187, 9190	0.1975	1583	0.1066	1586	0	0	0	2
Pilrb1	ACGTGACCCAAGCACTCAACA, AGCAAAGGCCAGCACACTAAA, ATGAAGTTGTGGCAGTCAATT, CAGTACTTTAGTCGAGTTAAT, CCAGCAAGAATCAGAGCTCAT, CCAGTACTTTAGTCGAGTTAA, CCCAGTACTTTAGTCGAGTTA, GAAATTCAGAAAGATACAACA, GGGAAGTCATCTACAACTCCT, TTTGGTCATAGTCCTAGTCTA	10	55967, 81241, 48303, 8004, 61999, 39449, 22140, 1538, 76484, 6286	0.1976	1584	0.1448	2139	0	0	1	3
Lhx9	CCAAGGTATCATGGAGGAGAT, CGGACCATGAAATCCTACTTT, GAATTACAACTCAGGTTGTAA, GCTATCAACCATAACCCAGAT, GCTGCTTCACTTGTTCCACTT	5	76088, 9312, 6957, 23072, 31205	0.1976	1585	0.1066	1585	0	0	0	2
Celsr3	CCCAATATCATGCTCAGCATT, CCTCTTTGTTTACAAGTGAAA, CGCTCATATAATGTACCAGAT, GCCAATGGTTTGGTGCATTAT, GCTCATATAATGTACCAGATT	5	76383, 87422, 2127, 16616, 10932	0.1978	1586	0.1069	1587	0	0	1	1
Gm4759	GAACACACTGAAGGACCAAAT, GACACTGATAGTTCCATGCAA, GAGAAACAGGACGGAGAATTT, GAGGCCTTAGATAGTTACATA	4	22890, 12833, 2463, 33638	0.1979	1587	0.0903	1353	0	0	1	1
A730017C20Rik	CATTGCTACTCAGCGAATCAA, CGCTTAAGTTAAAGGCGGATA, GAAACGCAACAAGCGATCAAA, GTCTTCAGTTATGAAGAACAA	4	10259, 61144, 10194, 30989	0.1979	1588	0.0903	1355	0	0	0	0
Ccl22	GCCATCACGTTTAGTGAAGGA, GCTACTCCATAAACTGTCCTA, GCTCAGAATCAGATTTCTTAA, GTGCCAATGTGGAAGACAGTA, TGGGTGAAGAAGCTACTCCAT	5	11448, 43964, 75704, 608, 52082	0.198	1589	0.1071	1592	0	1	1	1
Sec14l4	GCATACCAAGAAGGTCGGCTA, GCCATCTTGGAAGCAAATTAT, GCGTATCAAAGTCTGTGAGAT, GCTGAACAGATGTCTTCATTA, GTTTGACATCATTGGGACAAT	5	38915, 48673, 9594, 27098, 6174	0.198	1590	0.1071	1590	0	0	0	2
A1bg	CACAAGAAGCACCTCAGCTTA, CCGGAATTAGTTGTGGTGCAA, CCTGTGGAGGTTATAGTAGAA, GCTGAGTCAATGAAGCCATTT, GTAGAGTTAATGTGGAGTGAT	5	9341, 6958, 56127, 62357, 81819	0.1981	1591	0.1071	1591	0	0	0	2
Hspb9	AGCGGGTAGGAAGCAGTTTCT, GCAACCAAGTTTCCAAATAAA, GCAGAGTGTTCACCGACAAAT, GCCCTTGCTGAACGGAATCAA, GGGCCTAAGAGCTCCTTACAA	5	69763, 8636, 35024, 8783, 55539	0.1981	1592	0.1071	1593	0	0	0	2
Klhl13	CCATCTGACAGAAGTGGATAA, CCTTCAGTAATTGATACAGAA, CGTCGATACAGTGTTTAGATT, GCAGGAAGTACACGCATCTTT, GCTGTGAATACTACTCACCTA	5	6494, 88939, 9504, 10503, 59426	0.1983	1593	0.1074	1596	0	0	0	2
Usp43	CGTTCTTGATTCGGGAAGATA, CTTACCCAAGATGAAGTCTAA, GACTTCCTCTACGACTTGTAT, GCAGAGGGTGACAATGTGTAT, GCAGAGTTCAAGAATGCTGTT	5	9530, 51623, 6435, 47522, 89741	0.1984	1594	0.1075	1597	0	0	0	2
Cyp2j9	CATCAATGATGTGCCAACTTT, CCAAAGGGTATTATGGTTCTT, CTGCAATTGTTTGTTTCCGAT, CTTTACTCAAATGGAGCACAA, GAAAGTATGAAGAAATGGCAT	5	10971, 36196, 25020, 2132, 53893	0.1985	1595	0.1079	1602	0	0	1	1
Polrmt	CCAGTGCTTTACCATGTGTAT, CCCAGTGCTTTACCATGTGTA, CCTTATCCAGTTGGCCCATAA, GCTGCAGATCTTTAGAGACAA, GTCCAGCATCAAGTCCCTAAA	5	11357, 1008, 85136, 80456, 84392	0.1987	1596	0.108	1604	0	0	1	1
Rad54l	CCCAGAATGCAAGCCAGAAAT, CCTCTCTAAAGAAGCTGTGTA, GCAGTCAACATGAAGCATTTA, GCCCATGAATTCAAGAAGCAT, GCTGGTCTGGATGTAGTTGTT	5	37131, 36155, 6294, 9597, 63688	0.1987	1597	0.108	1605	0	0	0	2
Usp13	CCATTATGTTTGCCATATCAA, CCTTTCATCTATGCCTCAGTT, CGTACTTGTTTGATTGATCTT, GCAACAGTTGCTACCTCAGTT, GCAACGAATCATAACCTGGAA	5	43463, 11145, 77071, 1659, 54413	0.1988	1598	0.108	1603	0	0	1	1
Pag1	CAAGTCCACTTCTGCCTTGAA, CCATGTATGAAAGGGCCAGAA, CCTTCCAAACAGAGCCTTAAT, GAGAGTGACTACGAGAGCATT, GATCAAGGAAGTGGCAGACAA	5	30150, 9897, 5429, 41959, 75749	0.1989	1599	0.1081	1606	0	0	0	2
Zkscan5	GACCTTCTCATAGTGAAAGTA, GCAGACCTTCTCATAGTGAAA, GCAGTAGACATAAGCTCATTT, GCCTGTCACTTATGTGGGAAA, GCGACAGAAGAAGTAAGAACA	5	83557, 11176, 68297, 14008, 1593	0.1989	1600	0.1082	1607	0	0	1	1
Cyp2c68	CCCAATTTCCAGATGTGCTTT, GCAATGAAAGAAGCCTTCATT	2	15778, 10754	0.199	1601	0.0376	559	0	0	0	0
Rfc2	CAGCTAGAACATGCTCACTTT, CCGATGGCTGAATACTTGAAA, CCTGGAACTCAATGCCTCAAA, CCTTCTCAGGATTTGGCTATA, GCGTGTAATGCTTCAGACAAA	5	8316, 8944, 58198, 33329, 58325	0.1991	1602	0.1084	1611	0	0	0	2
Bcl11b	CCTGATGAAGATGACCACCTA, CGGTGAACACTTGCTGACTAA, GAGAACATTGCAGGTAAAGAT, GCAGGAGAACATTGCAGGTAA, GTCGGAACATTCCTCTGAGAA	5	4377, 88696, 10269, 33641, 44526	0.1993	1603	0.1086	1612	0	0	1	1
Olfr832	CCTGTTTGGTATTCTTCCACT, GCGTCTGTCATTCTGCACAAA, GTATCACATTTAGTAGTGGTT, GTTGTCCTTCTTGCTAAGTAT	4	12731, 3054, 81565, 48884	0.1993	1604	0.0914	1368	0	0	1	1
Vmn1r64	CAGAATGCATTACCTGCATAA, CCTGCATAATCCTAATCAGAT, GAATCTCGTCTTTGGTTAATA, GCATATTCATATGACCTGATT	4	47507, 13658, 90823, 284	0.1993	1605	0.0914	1367	1	1	1	1
Zfp687	CCGGTTCATTAGCCACAAGAA, CCTGTGGGAATATCACAAGAA, CCTTTCTGAATCCAACACTAA, GCCTCTGTTTACACGTGCTTT, GCTGATCTATAAGTGTGCCAT	5	30284, 84798, 8900, 8503, 59137	0.1994	1606	0.1088	1613	0	0	0	2
Obox5	CAAGTCTTTCAGTCCCTGAAA, CCACAAGAATACCTGCTTGAT, CCACTGTCAGATAAATATGTT, CCAGTACCCAAACGAGAAGAA, CCCAATGGCTTCAAGAAAGTT, CGGTTTCTGAGTCAACCCATT, GCCAGGAATCTTCCCTGTATT, GCGGATGAACCTCCAGAATAT, GTTCAAGAACAACCGAGCTAA	9	32019, 2824, 67853, 40438, 23041, 84321, 22365, 31208, 6370	0.1994	1607	0.1388	2052	0	0	1	2
Gata5	ACCGGACACTATCTATGCAAT, GAGTTCAAGTTCGAACCTGAA, GCATACATGAGTTCCGACGTA	3	15543, 10091, 12753	0.1995	1608	0.0715	1071	0	0	0	0
Usp46	CCAGAGCAGTTTCCGATCAAT, CCCTCCATGAAGCATATTTAT, GCATTACATCACCATCGTAAA, GCCGAGAACAATAAGCCAGAA, GCTCACGAGTTCTTAAATTAT	5	60354, 13173, 3732, 10511, 81547	0.1997	1609	0.109	1615	0	0	1	1
Dmrtc2	CAACTCTGATACTCCAGTCCT, GCAGTTTAAGATGACCCATAT, GCCAGGGATCCCTTCTGGAAA, GCCTCACACATGTTCAACTCT, GTGTCACAAATGTGTCCTCAT	5	29593, 64403, 4267, 61775, 10333	0.1997	1610	0.109	1616	0	0	1	1
Atp5s	CCCATCTGCTTCAAACAAGAA, CGATTCTTGTATCATGGACAT, GATAAAGAATACCTTGCCCAA, GCCTATTGGAACTGGAAATAA, GTCATGTGACTCCAGATACTT	5	40617, 90588, 2335, 10981, 11271	0.1998	1611	0.1092	1617	0	0	1	1
Olfr715	CAGCAACAGTATTGCTCACTT, CCCTTTACATTACTCTAGCAT, CTTATACCTGTCTCCCTAATT, GCTCTCATCCATCTCCTTTCA, GTAACCCTTTACATTACTCTA, TATCGAGGCAGCAACAGTATT, TCTTATTTCTGGGCATCTATA	7	89226, 26349, 92081, 7420, 4806, 72788, 91806	0.1998	1612	0.1236	1833	0	0	1	2
Myd88	CCTTGTTAGACCGTGAGGATA, CCTTTCACGTTCTCTACCATA, CTTCATGTTCTCCATACCCTT, GCCAGCGAGCTAATTGAGAAA, GCGACTGATTCCTATTAAATA	5	67953, 10475, 3892, 53319, 67018	0.2	1613	0.1094	1621	0	0	1	1
Exog	CCTGTCTTACGATCAGGCAAA, CGGAGAGATTTGAAGATGTTT, GCACCTTTACAAGGTGATCCT, GCATTGTGTTTGCCTCCGATA	4	37645, 9884, 79005, 10521	0.2002	1614	0.0921	1372	0	0	0	1
Igfbp6	AGACTACAAAGGAGAGCAAAC, AGATGGTCAAGGAAGCACTCA, CGCAGACACTTGGATTCAGTA, CGGCCCAATCCTGTTCAAGAT, CTCAGAGGCTTCTACCGAAAG, GCTGTATGTGAAGCAATGAAT	6	48506, 65640, 534, 63447, 10147, 38487	0.2003	1615	0.1212	1799	0	1	1	1
Zfp365	CATCGAGAAGAGAATCGACAA, GAGAATCGACAAACTCACCAA, GCAGAAGTCGAGCTATGTTAA, GCGGGTAACTTCTTAAATAAT	4	52980, 13448, 1125, 39551	0.2003	1616	0.0922	1373	0	0	1	1
Zfp105	CATAACCTACTGCTCCTAATA, CCTACTCATTCATCAAAGAAT, CCTAGAGTTATTGATTCCTAA, GCAAATCTTGTTGTGCATCAA, GCCTTTACTCAGAGTGCAAAT	5	9420, 87572, 13151, 44690, 7138	0.2005	1617	0.1096	1624	0	0	0	2
Gpx3	AGAGCAGAAATTCTACACTTT, CCCAGATTCTCTTTCTTATTA, CCTTCCAACCAATTTGGCAAA, CTGAATGCACTACAAGAAGAA, GCAGGCAAATATATCCTCTTT	5	9721, 30497, 21340, 6250, 35926	0.2006	1618	0.1097	1627	0	0	0	2
Gm4876	CCAGGCAATGAAGCTACTTAA, CCCATTTCCCTTCTAAATATT, CCCTTACATTTGGGCCTATTT, CCTTTCAAGATACAGAAGTAT, GCAATTCCGAGCTCGTTTCTT	5	11600, 70825, 28331, 623, 78434	0.2006	1619	0.1097	1626	0	1	1	1
Dmwd	CATCGATCTCAACAAGCCCAT, CCACTTTGACAGCATGCTTCT, CCTGGCATACCATTCAGCATT, CGTGTGCAAGAAGATTGCTCA, GTTCTCTGAAACATCAGTGTT	5	35889, 8988, 8459, 65642, 35952	0.2006	1620	0.1097	1628	0	0	0	2
Ap2b1	CCAGTCATCTTGTGCTGACAT, CCCAACAAGTATGAAAGTATT, CGCAAACACTTGCCAATTCAT, GCAGCTATGATTTGGATTGTA, GCCATCCAGTTTAACAAGAAT	5	1813, 60813, 11210, 42765, 75899	0.2007	1621	0.1098	1630	0	0	1	1
Epsti1	CAGAGAATTGCTGAGCAAGAA, GAGGCTGAAGTCAGACAGAAA, GCAACAGATGCGTTCTAAATA, GCTTGTGTTTGTTCCCAACAT	4	6586, 14932, 11658, 67221	0.2008	1622	0.0924	1375	0	0	0	1
Slc34a1	CCTGAGGAATCACAGTCTCAT, CCTTATCACAAGAGCCACCTT, GCAACCATATCTTCGTGGATA, GCCTTTGTGGTGCTTGTTAAT, GCTGGCTTTCCTTTACCTCTT	5	65797, 27854, 6740, 9571, 13392	0.2008	1623	0.1098	1629	0	0	0	2
Samd9l	ACACAATGATCACGAAGTATT, AGCCGGCTTCTTCGGAGAAAT, ATGGGTTACTGAAGATCTTAA, CAATGTTAATTTGCATCTATC, CGTATCATTCACCCTCTAATT	5	3786, 12108, 50841, 75896, 10559	0.2008	1624	0.1099	1631	0	0	1	1
1700129C05Rik	CCTTTCGTACCAACCCTCTTT, GAACTGAACAAGATTTCTCTA, GAATCAATGTTACCTATGGAT, GATGCTCAATCCCTGGATGAT, GCTCAATCCCTGGATGATCTT	5	9165, 69693, 31962, 43507, 7968	0.2008	1625	0.1099	1632	0	0	0	2
Atp5g3	CAATTTCTGCATCAGTGTTAT, CAGTGTAATCAGCAGAGACAT, GAGTTGCATATAGACCAATTT, GCCAAATTCATTGGTGCAGGT, GTTGCGTTCTTGATCTTGTTT	5	11247, 70104, 1723, 16800, 83578	0.2009	1626	0.1099	1634	0	0	1	1
Mef2c	CCAGCTTTGAGATGCCAGTTA, CCATCAGTGAATCAAAGGATA, CCCTATGAATCTAGGAATGAA, GCCTCAGTGATACAGTATAAA, GCGTAACAGACAGGTGACTTT	5	54822, 62518, 7004, 77657, 9487	0.2009	1627	0.1099	1633	0	0	0	2
Parn	CAAGTTTCTTTCCCTCAGATA, GAGAGATATCAGAAGCTTAAA, GCGTGTGTGTTATTAACTAAT	3	11085, 12548, 77624	0.201	1628	0.0729	1092	0	0	0	0
Spryd4	ACTCTGTAAGAGCTAGGTATA, AGACACTACTGGGAGGTAACA, ATGTGGCCAAGACCCTGAATC, CACCAAGGTGGCCCTGAATTT, CACGGGTGTCAAATATGGCTT, CCACACACTACAGACAGATTT, CCTTAGTGTCTAAAGCGATTT, CGTTGGTGCTGATGATCGTTC, GCTGGACTATGAGGCAAAGAA, GGCGACACGGGTGTCAAATAT, TCAGTTTCAAACTGGAAGAAA	11	64698, 6266, 51126, 21951, 66930, 51, 20175, 83277, 49044, 24759, 51877	0.2011	1629	0.1496	2206	1	1	1	2
Cpt2	CCAGCGGATAAACCACAACAT, CCTGGATATGTCCCAATATTT, GCCTCCATTCTTCCTCATGAA, GCTGGTTTGATAAGTCCTTTA, GCTGTTCACGATGACTGGATA	5	52315, 5874, 37778, 63072, 9878	0.2011	1630	0.1103	1640	0	0	0	2
Mgst1	CCCACCTGAATGATCTTGAAA, CCTCATGCACTTCAGAATCTT, CGCATTCCAGAGGATAACCAA, CTATGGAGTTACTTTGTCAAT, GCGTGAAAGGAGCAGAGAAAT	5	20273, 5243, 10093, 66830, 44774	0.2012	1631	0.1103	1639	0	0	0	1
Hsp90b1	ATTATACTCTCGCTATGAATC, CCATAGCCAAATCTGGAACAA, CCATGATATGATGCCCAAATA, CGGCGGATTAAGGAAGATGAA, GCCCTCAAGGACAAGATAGAA, GCTATTCAGTTGGATGGGTTA, GTGATTGAAGACCACTCAAAT	7	346, 89688, 90968, 66161, 21989, 8970, 83920	0.2012	1632	0.1254	1861	1	1	1	2
Pmpca	CCCGACTGACAGATGAAGAAA, CCCTGTAGAGAACATAGCGAA, CCTAGTAGAATGTGCCAGAAA, GCAACAGTTGATGGACAGGAA, GCCCAGATCATACCGGCTGTT, GGTAGAACCACTGGCATAAAT, TCACGATATGAAGCGAAATAT, TTTCGTCCACTGCTCGATTTG	8	7670, 44673, 30500, 1457, 24140, 53196, 55232, 63739	0.2014	1633	0.1335	1974	0	0	1	2
Cnp	CCCAGATGCATCCAAGAACTT, CGACACTTTATTTCTGGAGAT, CGAGTGCAAGACGCTATTCAT, CGCTGATGCTTACAAGATCAT, GACTAAGAAGATGGAGGTCAA	5	2368, 37769, 34771, 11069, 49770	0.2015	1634	0.1105	1642	0	0	1	1
Sgpp2	AGATTGGTTGTGATATGGGTT, CCCTAATTTGTCCAGAAGATT, CCCTGCAAGTATTATTCTCAT, CCGTTCCTCTTGTGCTACAAT	4	58686, 552, 20624, 13720	0.2015	1635	0.0927	1378	0	1	1	1
Olfr1294	CCACATTACAGTCGTGCTAAT, CCTTAAGAGATGCAGCAGTTT, GACTGTATGTAAGAGCTCTAA, GCAGCAGTTTGGTGTTGACTT, GCATGCATGGATTATCATTAT, GCTCTAAAGCTGGTGCATCTA	6	4729, 52387, 55074, 8811, 76941, 11270	0.2015	1636	0.1224	1813	0	0	1	2
Efs	CCCGAGGAACTCCTGGCAAAT, GCAGGCCCTCACAATGAATAT, GCAGGGTATTGTCCCTGCTAA, GCTAACAGAGTGAAGCTCCTT, GCTGAAGATGACAATGTAATA	5	69117, 6340, 91808, 9754, 28938	0.2016	1637	0.1106	1645	0	0	0	2
Acad10	CCATGCCATAGAAAGGGAATT, CGACAACTGGAACTTCTACAT, GAGTTTGGCATGGTCTGCTAT, GCAGTCCTCACCAACAACTTT, GCTTTAGACATTGCAATGATT	5	27821, 6902, 33132, 9598, 84744	0.2022	1638	0.1111	1647	0	0	0	2
Esrp1	CCACCTGTAAATAAGAAGAAA, CCGGTACATTGAGGTTTACAA, CCTCCCATTATCCCTGTACTA, CGGTACATTGAGGTTTACAAA, GCTGCCACAATAGAAGACATT	5	77728, 9142, 8284, 15095, 79559	0.2022	1639	0.1112	1649	0	0	0	2
Pbp2	AGCACAGACCCGGAAGCATTT, CAAACAGCTGTCTGGGAAATA, CACGTGTTACCAGGCAGAATG, CAGTAGGAAGAAACCCGTGTA, CCCTAAAGATTCCAAATAGTT, CTGTGATGGACTCGTTATATT, GACCATCGTGGGAAGTTCAAA, GTACAGGGAATGGCACCATTT, TGGCCACTCCTGCCATATTAT, TGGGAACGTCCTCTCGGATTA	10	6484, 9086, 28491, 1435, 25535, 66139, 53794, 65346, 19891, 42308	0.2023	1640	0.1513	2220	0	0	1	3
Mrpl46	CGAAAGCTAGACAGAAACCTT, GACCAAGATGTTTGGATGCTT, GACCTTTATGATGAGGAACAA, GCAGACTCAATTCGAGAATTA, GCTGACCTTTATGATGAGGAA	5	10188, 78573, 89218, 5172, 43420	0.2024	1641	0.1113	1651	0	0	0	1
Olfr1009	CCTGTTGTATTCAGTAGCCAT, GCAATGGTTCTTTGGGTTCTT, GCGCTGTATTGATTGTCAGTA, GCTGACATACGGATCAACAAA	4	8121, 11260, 66234, 29567	0.2024	1642	0.0929	1381	0	0	0	1
Trim61	CCTCTGAAGATTTGCACAGTT, GACAGAATTATCAAGCGATTT, GCCTTACTTCTACACTGGATA, GCTGTTCTGTCTGTAAGGAAT, GCTTACAGTCTCAAAGGATAA	5	49262, 2971, 10929, 14068, 66837	0.2025	1643	0.1113	1650	0	0	1	1
Ly6c2	GAATTGATTGAGGACTCTCAA, GAGTGCTATGGAGTGCCAATT, GCCTCTGATGGATTCTGCATT, GCTTTCAAATCTGTACTTCTT	4	13979, 34949, 1, 50315	0.2026	1644	0.0933	1384	1	1	1	1
Tnfrsf8	CCTGACTACTACGTCAATGAA, CGCAAGACACTTACTAGCCAT, GCAGAAGTTTCACCTGGACTA, GCTACTGAGTTGGTGAAGGTT, GCTGAACTAGAAGTGGACCAT	5	81595, 83749, 10600, 34508, 3975	0.2026	1645	0.1116	1652	0	0	1	1
Emp1	CCAGCTCTTCACTATGGAGAA, CCTACGGCAATGAAGATGCTA, GCACTCAATGTATCTTGTATA, GTGTCAATCTACACTCATCAT, TGTCAATCTACACTCATCATT	5	69332, 11684, 51307, 84135, 745	0.2027	1646	0.1118	1655	0	1	1	1
Tmcc2	ACTGCTTTCAACCGGGTGTTA, CCAGAATGAAATGACCAACCT, CCAGCGAACTAAGGCTGCCAT, CCAGGGCTGCATTATTTGAAT, CCGAGATCCAACACTCTTTAT	5	89181, 9542, 80779, 83133, 7172	0.2027	1647	0.1118	1654	0	0	0	2
Ube2t	CCGATTTCTAACTCCAATCTA, CCTGACGTTCAGAGAGTCTAT, CTGTGTCAAGGTGGTCTCTTT, GCCACTGTATTGACCTCTATT, TCCCTCAACATTGCCACTGTA	5	5373, 36951, 62242, 10151, 56210	0.2029	1648	0.112	1658	0	0	0	1
Ppil3	CCACACTTGGACATGAAATAT, CCTCTTAATGATGTACACATT, CCTGGACAGATACTTGGTGAA, CGGCTGTGTGTTTCATAGAAA, GCCACACTTGGACATGAAATA	5	82145, 710, 35167, 47127, 11708	0.2029	1649	0.112	1659	0	1	1	1
Mag	CGTCATTTGTACCTCCAGGAA, CTGGTATTTCAATAGTCCCTA, GCAGTGTCTATGTGTGGTAAA, GCTCCCTTTCTCTTGAGAGTA, TGCTACACTTCGTGCCTACTA	5	9043, 84085, 81514, 8718, 42582	0.203	1650	0.112	1661	0	0	0	2
Arhgdia	AGCTTCAAGAAACAGTCGTTT, CAGTCGTTTGTCTTGAAGGAA, GAGTGGAATCTCACCATCAAA, GCCTGGCCTGTCAGTATTTAT, TCCGGCATGAAGTACATCCAA	5	11084, 2602, 13634, 87402, 57055	0.2031	1651	0.1122	1664	0	0	1	1
Slc26a7	CCAGCCATCATTTATGCTATA, CCGCCTCATTTGCTTGCTATT, CCTAAAGGAAAGTGACAGCAA, CGCAGTACAATCTGAAGGAAA	4	80056, 13804, 8645, 11129	0.2031	1652	0.094	1398	0	0	0	1
Adipoq	CCCAATGTACCCATTCGCTTT, CCGAAGATGACGTTACTACAA, CGACTCTTACATGGTAGCAAT, CGGGACTCTACTACTTCTCTT, GCTTAGTTTGAGAGATTGATT	5	1998, 11286, 63582, 56366, 65772	0.2031	1653	0.1122	1666	0	0	1	1
Ddx19b	AGGGAGTCTATGCTATGGGTT, CCAACCTATGAGCTTGCTCTT, CCCAAGAAGATCAAGGTGTTT, GCTGACATTCTTTCCAGGAAA, GCTGTTGTTAAGACCAATGCA, TGTTGTTAAGACCAATGCAAA	6	17440, 82337, 89459, 51637, 27, 10463	0.2032	1654	0.1242	1842	1	1	1	1
Zfp280c	CCCGAAATGCAGACTACAATT, CCCTTATATGAATCACTACAT, CCGTAACTTCTGAATCCGCTT, CGACCCAAGATATACCGTCTT, GCTCGCATTATCCAGCTCTTT	5	10244, 13927, 5149, 24136, 24292	0.2032	1655	0.1122	1667	0	0	0	1
Naaladl1	CCCAGTTAGAGAAACAGAACA, GAGCTTGCCTAATGAAACCTT, GCCCAATGTATTGCAACCTTA, GCCTAATGAAACCTTCCCAAA, TCGATACGTGATCTACGGAAA	5	5829, 10019, 28026, 42657, 48235	0.2032	1656	0.1122	1665	0	0	0	1
Vmn1r215	AGAAACCTGTCGACCTTATTG, GCCAAATTATTCCCTTTATTC, TTATTCTACTGGGCAGATTTC, TTGTGGGAAATATGCTAATAT, TTTGTACAACTGGGATCAAAG	5	10666, 3889, 36041, 87717, 78607	0.2032	1657	0.1122	1668	0	0	1	1
Rbbp9	ACATCAGACTTGGGAGATGAA, CAAGGCCAACTGCCCTCACAT, CTCTCGTATTGGTGTCTGCAT, CTGTGACGAGAAGACCATCAT, GACGAGAAGACCATCATCATA	5	35245, 1664, 29308, 13840, 11415	0.2034	1658	0.1123	1669	0	0	1	1
Fam19a2	CAACCATCACAAAGCTCACCA, CGCTGCACAGATGCTGTAATA, GAGCTGTTCCTCTGGAAACAA, GATGCATCCATAGTGGAACAA, GCTGTAATAAGAACAAGATAG	5	14755, 61047, 5162, 10249, 46242	0.2034	1659	0.1123	1670	0	0	0	1
Serpinb10-ps	CAGCCAGAGTAAAGCTGATTT, CCTGGAAATTCTTACGTTCTT, CTGCATCTCTCATTTAATGAA, GAGGGTAGAAACATCTTCTTT, GTGCAAATGATGTCAATGAAA	5	31709, 70007, 8968, 76153, 8981	0.2034	1660	0.1124	1673	0	0	0	2
Cdyl	CCGTTATGTTTCCCAAGATTA, CGAGTGTTACTTGCTAAGTTA, CGTCAGAGAATAACTCACTAA, CGTGAATACTTTCATTCAGTT, GCTTGGTTTCAAACACCCTAT	5	9449, 7572, 62705, 49811, 16469	0.2034	1661	0.1125	1675	0	0	0	2
Micu1	ACAGACCAAACGAAGATTGAT, CCCTCAAGTCTGGCTTATGTT, CGCAAACTTCAGCATGACGTT, GCTCTGGATTCAGAGACAGAA, GCTGTGGATTTATAGTAGCAA	5	7515, 73299, 9470, 49813, 20424	0.2035	1662	0.1125	1674	0	0	0	2
Vmn2r123	CATACAATCTGAGCATGGGAA, CCACAAAGGTAAATTGCTTTA, CCCTTTATTGACAGAGACATA, CCTTGATGTTTCACTTTAGAT, GCTGTTTGACTGAACCAAGTT, GTCAGGATTTATTGAGAGTTA	6	47762, 78428, 6814, 89016, 8217, 72738	0.2035	1663	0.1244	1843	0	0	0	2
Arhgef7	AGAGACACATGGAGGATTATC, CAGATCCTGAAGGTTATCGAA, CCTGAAGGTTATCGAAGCTTA, GAAGTCTATGACGGCCTTCAA, GATACGGTGTATGCGTTAAAG, GCCCTCCCAAAGGGTTCGATA, GCGAGAATAAAGCAATACAAA	7	91408, 16351, 4194, 19271, 44663, 90887, 7797	0.2037	1664	0.128	1897	0	0	1	2
Lef1	AGCCGACATCAAGTCATCTTT, ATCCCGAGGACATCAAATAAA, CATATTAAGAAGCCTCTGAAT, CCAGTTACTCTGGCTACATAA, CCCAAGGAACACTGACAGCAA, GCCGACATCAAGTCATCTTTG, GCGACCCGTACATGTCAAATG, GCGAGACAATTATGGCAAGAA, TCTGGAGATGGAAGCTTGTTG, TGGTGGTAAGAGAAGCTCCTT	10	28230, 67103, 47072, 5462, 59699, 4645, 85893, 12167, 80485, 88667	0.2037	1665	0.1531	2238	0	0	1	2
Lrrc33	CGACATGAGTCACAATCAGAT, GAGACTGGACTTGTCTGGAAA, GAGATGGACTTCTCTGCGTTT, GATCTCACTTTGTCCTCAGAT	4	13679, 9187, 74846, 10998	0.2038	1666	0.0948	1410	0	0	0	1
Asxl2	CCCAGTCAGTACAAATGGAAA, CCTCAAGTGATCCCAAAGCAA, CCTGCCAGTCAAGCAATGAAT, GAAACCCATCAAGAGCCCTAA, GCACATAAACAGATGACTCAT	5	7737, 9416, 58935, 50194, 43995	0.2038	1667	0.113	1680	0	0	0	2
Stk3	CCCATGATGGAACGAGAAATA, CCGGGAATATTCTCCTCAATA, CCTGAGGTAATTCAAGAAATA, CCTTCTTTCATGGACTACTTT, CTGCAAGAGAACTAATCTAAA, GCAATTAAGCAAGTACCTGTT	6	55534, 9678, 34534, 65862, 54555, 2482	0.2038	1668	0.1249	1850	0	0	1	2
Hist1h2br	CAAGGAGAGCTACTCGGTGTA, CATCATGAACTCGTTCGTGAA, CCAGAAGAAGGACGGCAAGAA, CCAGAGTTCCAGTCTCATCAT, CCCAGAAGAAGGACGGCAAGA, CCCGAAGAAGGGCTCCAAGAA, CCTGGTGTTTCCTGTCTCAAA, CGACACCGGCATCTCCTCCAA, CGGCATCTCCTCCAAGGCCAT, CGTCACCAAGGCCCAGAAGAA, CTACTCGGTGTACGTGTACAA, CTCCAAGAAGGCCGTCACCAA, CTCGTTCGTGAACGACATCTT, GAACGACATCTTCGAGCGCAT, GAACTCGTTCGTGAACGACAT, GAAGGACGGCAAGAAGCGCAA, GCATCATGAACTCGTTCGTGA, GCTCCAAG…	22	84203, 40818, 70731, 1444, 75001, 39504, 73441, 81032, 48604, 43921, 28573, 71489, 64974, 17835, 48325, 27873, 11208, 84973, 2923, 13741, 83192, 63385	0.2039	1669	0.1785	2638	0	0	2	2
Birc5	ACCGAGAACGAGCCTGATTTG, CAAAGACTACCCGTCAGTCAA, CCCGATAGAGGAGCATAGAAA, CCTACCGAGAACGAGCCTGAT, GAAGAACTAACCGTCAGTGAA, GCAGCTGTACCTCAAGAACTA, TCTATTGTGACGTGGACTTAA	7	38207, 85315, 4239, 46214, 83088, 57597, 7794	0.2039	1670	0.1281	1899	0	0	1	2
Fut2	CCAGCAACGAATAGTGAAGCT, CGGTTCAAATGTCCTCACCAA, CGTCTTATCATCTGTTAAGAT, CGTGGTTACAAGCAACGGTAT, GCAGGGCATATTCACGATCAA	5	85462, 69806, 9089, 80491, 8744	0.2039	1671	0.113	1682	0	0	0	2
Fgf20	AGGATCACAGTCTCTTCGGTA, GAACTTTATGGATCAGAGAAA, GAGAACTGGTATAATACCTAT, TGAATGACAAAGGAGAACTTT, TGCATCTTCAGGGAACAATTT	5	14326, 20597, 90254, 8382, 9213	0.204	1672	0.113	1681	0	0	0	2
Mtmr4	AGGTCCCAAGATGATTCATAA, ATACTACTGGATCCATATTAC, CCAGTTATTCTGGGCTGTGAA, CCGAACTGTGAGGTCTTGTTT, CGGATGATTGACAGTGTGGAA, GAGGATGACTTTACGTGTTTA, GCAATAGAAAGGCTTACTTAT, GCCAGATCAGTGAGTTCTCAT, GCGCAATGCTGATGATGAATA, GCTTCAGATGAGGCTAGACAT, TAGCAAGAGGCCGAGCAATAA	11	54699, 84669, 12389, 919, 77508, 55561, 48247, 6071, 38963, 92246, 41810	0.2041	1673	0.1532	2241	0	1	1	2
Eral1	CCTCTCTGTGAAACTCCTCAA, CGAAGAGATCTGTGCCAATAA, GCCGTAAAGTGTTTCCTGTTT, GCTGATCTTGTTGTAGTTCTT, GCTGGCTATCTCTACATAGAT	5	88577, 6304, 53246, 9911, 27414	0.2041	1674	0.113	1684	0	0	0	2
9230104L09Rik	CCCACCACAAGGATCTACTTA, CCTCATCTGTTCCTTCAGCAT, GAACCTGACATAGTGAAGTTT, GACAAGAACCATCTGTATGAA, GCTGACAAGAACCATCTGTAT	5	79483, 76876, 43835, 2237, 11267	0.2041	1675	0.113	1683	0	0	1	1
Gimap7	AGGATTGTTCTGGTAGGGAAA, CCAGAGCTTAAGCGACTTCAT, GCAGAACAATGGTGGTCTCTA, GCAGATTTAAGAGATAGCAAA, GCTCTTCGACACCAAGGTAAA	5	5117, 10311, 14687, 56645, 30614	0.2042	1676	0.1131	1686	0	0	0	1
Chrne	CATCTCTTCGACAATTATGAT, CGGCAATACCATCAACAAGAT, GACAGCAATGTTCTAGTCTAT, GCCACGCTCATTGTCATGAAT, GCCCAGACTGTCTTCTTGTTT	5	11168, 38539, 2563, 28142, 86214	0.2043	1677	0.1131	1685	0	0	1	1
Adam19	CCTCCTTATTTCTGACTCATA, CGCAGAATGAAACGGGAAGAT, CGCTACAGCATGAACTCATAA, GCATCAGTTCAGTTGTCCCTT, GCCATGACAATGCTCAGCTAA	5	15342, 9385, 90505, 91105, 7927	0.2044	1678	0.1131	1687	0	0	0	2
2310007L24Rik	AGCATAACCGGGTCAAGGAAG, CTCCAGCTTCAGACTACTATG, CTTGTCACCTTCTGCACAGTG, GAGCCTGCCATGAAGATAGAT, GGAGCAAGAGCCTTTGGTTTA, TAGATGTACACCAGGCCTTGT, TCCCTTGGACAGTCCCATCTT, TCTTCTCAGCCTCAGCATAAC	8	6698, 46448, 71286, 11615, 55320, 8685, 85114, 4744	0.2045	1679	0.1365	2018	0	0	1	3
Nostrin	CGCTTGATAATGAAGTGGAAA, CTTTGCACATTCTGTAAACAA, GCAATTGAGTTGGAAGCGATA, GCACTCTCATACTTATGTGAA, GCGACGGAAGTCTTTATTAAA	5	58888, 22491, 10643, 35463, 4180	0.2045	1680	0.1133	1688	0	0	1	1
Zfp354b	CAACTCAAACTAAAGAGTCAT, CCCTAACCAATCACTATAGAA, GAGGACGCCTTGAACATAGAT, GCAAGCACCTAAGAACTCATA, GCACTATAGAAACACTAGAAA	5	40392, 105, 27408, 26402, 12011	0.2047	1681	0.1136	1691	1	1	1	1
Serpina3i	AGAGGAACTAACTACACCCTA, AGTTAATCTACGTTGTGGAAA, CCGTGATACATTTAATTCCAA, CCTGGATAAGAGCACGTTGAT, GCAGTCCATGAAGTCCAAGAA	5	3540, 59665, 63471, 10873, 90245	0.2048	1682	0.1137	1693	0	0	1	1
Itgb3	CCCTGTTACAATATGAAGAAT, CGCCGTGAATTGTACCTACAA, GCATCCCATTTGCTAGTGTTT, GCTCATCTGGAAGCTACTCAT	4	13127, 50872, 15797, 3044	0.205	1683	0.0968	1436	0	0	1	1
Ndst1	CATTCGAACCTGGGCTTGAAA, CCCAAATACTAAGAAGCTAAA, CCGATACATCCTGGTGGATAT, CCGCACACATATTCCAAACTT, GCCCTAAAGTACACCTTTCAT	5	6390, 66715, 60281, 48964, 9934	0.205	1684	0.1137	1694	0	0	0	2
Ttll1	CCAGTGATGAACAACGACAAA, GCAAACCATTCGCAACGTGTT, GCCTTGTAAATAAAGACTCAA, GCGTACGTGATCTCAGTCTAT, GTACGTGATCTCAGTCTATAT	5	39938, 57173, 9844, 6663, 70229	0.205	1685	0.1137	1692	0	0	0	2
Plch2	CCCATTCTTCTGTCTGTGGAA, CCTGCCAATATCAGTGAGGAT, GCTACATAAACTCAACGTGAA, GCTGACCTACAGCAACCATAA, GTCATCGAAACCATCAACAAA	5	86062, 64854, 8613, 9202, 23873	0.2051	1686	0.1138	1696	0	0	0	2
Tnfsf4	CGATGGTCGAAGGATTGTCTT, GAGGTCAAGATTGACCTTCAT, GCAACTATTCATCAGCTCATA, GCAGAACAATTCGGTTGTCAT, GCCAAGATTCAAGTGGAAGAA	5	34776, 41193, 6593, 66236, 9876	0.2051	1687	0.1138	1700	0	0	0	2
Usp6nl	CCTCTCTTTCAGTTGACACTT, CCTCTTCTTGTATCTGAATAT, CGACGAATTTACAAAGGAATT, CGAGAAGTTTCATCGACGAAT, CGAGCTGAAATAGTTGCTAAA	5	10130, 5834, 48456, 68726, 67042	0.2052	1688	0.1138	1697	0	0	0	1
Mettl1	ATGATCCAAAGGATGAGAAAG, CAGAGTTCTTTGCTCCGCTTA, CCAGAGTTCTTTGCTCCGCTT, CCCACACTTTAAGCGAACGAA, CGCCATGAAACACCTTCCTAA, CTACGCTTCTGGCAGAGTATG, GCCATGAAACACCTTCCTAAT	7	69757, 86275, 7920, 4034, 39491, 73881, 38518	0.2052	1689	0.1302	1924	0	0	1	2
Mrpl15	CAGCCGCTTAAGAGGGATTAT, CAGCCTTCTATGACCCAAGAA, CCCTCTTAGGATTTACATATA, CCTTTGAGTCTCAGGAGACTA, GCCCAGTCCTAACTCCAGAAA	5	12006, 76369, 67083, 31839, 222	0.2052	1690	0.1138	1699	1	1	1	1
1700074P13Rik	CCTGACATCTTGACATGGATA, CCTTGTGTTGGGACTCTCATT, CTATGCAAGATGGATCTTAAA, GCAGTAGCTAATACTCCCAAA, GCTATGGAACCAATGGCATTT	5	29305, 1611, 26246, 35426, 11551	0.2054	1691	0.1138	1695	0	0	1	1
Pomt1	AGGAACTCCAGGGACTAATTC, CAGTAGCAATGTGCCTATATG, CCCTGGTTGTAGCATGGTATT, CCTGTGCAGTTGGGATCAAAT, CCTTGTTTGAAGCAATTGATT, GACATCAATTTGAACTTGGTA, GCTGGGATATTCTGATCCGAA, TCTCCTGCTACATTGACTATA	8	25090, 60925, 89163, 66000, 7385, 2796, 50126, 37616	0.2054	1692	0.1372	2031	0	0	1	2
Sohlh2	AGCTCTATTGAGGATCTGTAT, CCTGAAAGACTTAAAGGCTAT, CTGAAGAATGACGCTAGACTT, GCCTGAAGTTAGCTTTATTAA, GCTAACTCGTTTGACATAATT	5	9526, 34777, 34763, 81835, 7698	0.2054	1693	0.1138	1698	0	0	0	2
Fbrs	CAAAGAGTCTGTGCGGGTAAA, CCTGCTCATCCACTGCTATAC, GACACAGATCCCTGATCATTT, GGGTTTCATGTACATATTTAT, GTACCCACATTGATCCCTTTG	5	19792, 46135, 11288, 2439, 64705	0.2056	1694	0.1141	1702	0	0	1	1
Cd209e	CCCAGATTTGAGGATGTCATT, CCCTTGGGATTGGACGTTCTT, CTGAGCCAACTGAAATCTGAA, GCCAAATGTGAACAAAGGAAA, GCCCAACTAGTCATCATCAAA	5	38164, 75347, 47896, 5912, 10133	0.2056	1695	0.1141	1704	0	0	0	1
Il1rn	CATCACTGATCTGAGCAAGAA, CCTGAGAAACAACCAGCTCAT, CCTTATAGTCACGAAGTTCTA, CCTTCAGAATCTGGGATACTA, TGGTGCCTATTGACCTTCATA	5	969, 26627, 13510, 15678, 11783	0.2057	1696	0.1141	1703	0	1	1	1
Akr1a1	CCCAGAGGAGATGAAACAATT, CGGTATATTGTGCCCATGATT, GCAGCCATTAAACATGCCCTT, GCCGATGGAACTGTCAGATAT, GCTTGAAGAACCAGTAGTCTT	5	1338, 29446, 11680, 59333, 11661	0.2057	1697	0.1141	1705	0	0	1	1
Zg16	CCGGGTCAACAGATACTACAT, GATGATCTTCGTGACGGACAA, GTATGGAGGTAAAGGAGGAAA, GTCTGGCAAGTACAAATCATA	4	39108, 1224, 13805, 73574	0.206	1698	0.0984	1462	0	0	1	1
Olfr98	CACTGCTGTACCCACTTCTAA, CCATACTTTGTTGTTCTCTAA, CTGCTCTGATACATACCTCAA, GCATCTTCCTTGTTCTCTACT	4	35534, 10001, 36080, 10886	0.2061	1699	0.0986	1465	0	0	0	0
Brox	CCCGCTTCAAAGATTTGCAAT, CCTTCACTTGAAGATGTGCTT, CGATCTCTCCAAGAAGCAGAA, GCAGACTTGTATTTCTCTCTT, GCTTCGCATAATAGGAATAAT	5	59780, 5844, 10187, 47371, 21221	0.2062	1700	0.1149	1709	0	0	0	1
1110005A03Rik	CAGAAGACTTTGAAAGCATTT, CTGAGGAAACTCAATGGGTAT, GAATTATCTGAGGAAACTCAA, GATGTGTTCTTTGAACCAGAA, GCTGAATTATCTGAGGAAACT	5	11492, 90120, 12280, 1944, 58742	0.2063	1701	0.115	1710	0	0	1	1
Ap3s1	CCAAGTATGTATTGCATGAAA, CCATGTAGACAAGGTTCATAA, CCGTGCTGTATCAGCTGTAAA, CGCGATGAGAACGTTTGTAAT, GCTCTGACAACAAGCTCATTT	5	82885, 2811, 11203, 73548, 91448	0.2063	1702	0.115	1711	0	0	1	1
Snapin	CAAATTGACAACCTAGCTACA, CAACCTAGCTACAGAACTGTG, CCGGGAACAAATTGACAACCT, GAACAAATTGACAACCTAGCT, GATCAATGAGGATCAGAAAGT	5	32584, 9183, 90700, 62526, 8881	0.2063	1703	0.115	1712	0	0	0	2
Trim5	ACCCAGTTATCCAATCAGGAA, CAAGCAAGGAATCTTGAACAT, CCACCAAATGCGATAAGGAAA, GCAGAGTCTGAAAGTGAGCAT, GCCGACTTAGTTACCAGTCTA, GCTCTTCTGTAGGAAGGACAT, GCTGAAAGAAACCCTTTATTT	7	91140, 48607, 9568, 35526, 9305, 44113, 43	0.2064	1704	0.1313	1942	1	1	1	3
Spag4	ACAGCGAGAACAGCAATAGTT, ACCCAACTTCTACAGCGAGAA, CTCTCATAATCACACACCCAA	3	7930, 14041, 88976	0.2065	1705	0.0758	1133	0	0	0	1
Prmt6	CCAGCTGTACTACGAGTGCTA, CCCTCCTCATACCATTTATTT, CGCATACTTCTGCGCTACAAA, CGTGGATATGAGCTGCATGGA, GTGGAACAAGATACGGACATT	5	26359, 12134, 44929, 76447, 59	0.2065	1706	0.1153	1717	1	1	1	1
Cntrob	CCTCAACCAATTTGCAAGGCA, CTCCTCTTCTGCCATTCATTT, CTTGAAGGCCTCAAGAACTTT, GAAGAAACACAGACTCCCGTT	4	57003, 47339, 13746, 1532	0.2066	1707	0.0988	1466	0	0	1	1
Smpd4	CCAATGTCTATGACCCTCCAT, CCCAATGTTTGGTCCTGAAAT, CCTCAATCCATTTGAATACTA, GCAGTGGTGGAGTTATTCAAA, GCCTGAAAGCTGACTCTATAA	5	58422, 11837, 66512, 41760, 981	0.2067	1708	0.1153	1714	0	1	1	1
4930444A02Rik	AGGGAGTGATATGGTTAGATT, GATGGCACTATTCTCACCGAA, GCAGACGAAAGAAATGCTGTA, GCTAACAAGTAACTTCAGCAT, TGGAAGAAACACTAAACCTTT	5	26228, 75158, 2022, 11493, 53241	0.2067	1709	0.1153	1716	0	0	1	1
Ssbp2	CCAACACGACAACAAGGACAT, CCATCACATGAACGGCTCTTT, CCCAACAAATGCGAATTCAAT, CTCAGAAATCGGCTCAGACAT, GCGATGATTATCTGTGTGTAT	5	21211, 30215, 11718, 12075, 1357	0.2068	1710	0.1154	1719	0	0	1	1
Ptprr	CCCACCTACTTCAAAGTGAAT, CGAGGTTCCAATGTATCTCTT, CGGTGTTCATTTATGACCATT, GCTACATCCATTGGCTGTCAA, GCTTTCCTTAAGACAAGATAA	5	5904, 70680, 74080, 10203, 62393	0.2068	1711	0.1154	1720	0	0	0	1
Mid2	CCTCCATTAGTGCTCCATATA, CGCTACATCTTTATCGTGAAA, GCCAGCAAGTTGAGGTGAATA, GCCTGTACAATTCAGTGGATA, GCTGAGCATATCCTAAAGGAA	5	22, 60992, 45417, 19642, 12173	0.207	1712	0.1156	1724	1	1	1	1
Fcgr1	CCCTGAACTGTGAGACGAATT, GATGGCGTGTATGAAGAAGTA, GCAAATTCCTTTCAGCAAGTT, GCCTAGTTATAGCATCCCAGA, TCACGGTGAAAGAGCTGTTTA	5	36061, 5563, 10330, 77375, 78317	0.207	1713	0.1158	1727	0	0	0	1
Tmem206	ACCAGCGTGGTTAACTATATT, CAGGACATAATCACAGCCAAT, CCAGTGAATAACCTGAAACTT, GAAGCTGTTGAGTTCCGTCAA, GCACCACTCAGAGGATCAATT, GTGTCTTACAAGGAGGTGGAT, TTGCCAAACTAAGCGTGAAAT	7	74973, 71525, 6401, 7219, 86916, 80182, 36595	0.2072	1714	0.1325	1961	0	0	0	2
Lhfpl5	CAATTCTAACAGCTGAAGAAA, CTGTAATACAGCCACGGTCTA, GCAGCAACAATTCTAACAGCT, GTCTAGTCTACCCAGATGGTT	4	71816, 1617, 40747, 13762	0.2073	1715	0.0994	1474	0	0	1	1
Lman2	CCTGTCTGACAACCACGACAT, CCTTCCTAGCTGTACGCTATT, GCCATCTTCCTGGACACGTAT, GCCTTCCTAATCAACACTGAA, GCTTCCTTAAGGACTGGGAAA, TGCCCACTGGCTACTACTTTG	6	6602, 48316, 8483, 52749, 46731, 53162	0.2073	1716	0.1286	1906	0	0	0	2
Psma5	ATATGCCATTGAGGCTATCAA, CCATAAGTCTATGACTCTGAA, CCTAGCAGCATTGAGAAGATT, CGTCCTCGAACTTCTGTGGGA, GAACCACTGGTTCACCTATAA, GAAGTTTACCATAAGTCTATG, GGTGCAGCCTGGTCAGAATTT, GTAGAGATCGATGCTCATATA, TCTCCTGAAGGAAGATTATTT, TGTGCCATGAGTGGGCTAATT, TTGGAGTAGCATTGTTGTTTG	11	6258, 662, 29335, 16943, 87735, 54270, 69251, 63803, 60788, 50268, 89880	0.2073	1717	0.1573	2311	0	1	1	2
Pex11b	CAATGTCCTATGGGCTGGAAA, CTTTGAAGTTTCGGCTCCGAA, GATGCTTATGAGATTCGCCTA, GCGTTCATTCAGATACTATCT	4	24403, 13948, 23505, 1081	0.2074	1718	0.0995	1475	0	0	1	1
Nr4a1	CAAGTACATCTGCCTGGCAAA, CCAGAGTTCTCTGAAATTGTT, CCATGTGCCTTTAAGCCTATA, CTTTGGTGATTGGATTGACAA, GCCCATTAGATGAGACCCTAT	5	51189, 2391, 51522, 11412, 40811	0.2074	1719	0.1163	1731	0	0	1	1
Ptpn9	ATGGTTCCGAGTGCCCTATTC, CCACACTCAGACAGATTACAT, CCTTTCCCTTTGGCTAGATAA, CGAGTGCCAAGCACGTTTATA, CGGGTCTAATTATGCCAACTT, TATGACATGTGCGGGTCTAAT, TCCAAGAGTTGGTAGACTATG	7	62386, 7964, 4207, 68711, 71531, 23343, 14879	0.2075	1720	0.133	1964	0	0	1	2
Tbck	CCCTTGGTTTCTCACCATGTT, CCTCCACTTATGAGAGGTTTA, CCTGTATAACTTCTTCTTGAA, GCCATATTAAACTGGCTAAAT, GCTGTGTAGATGATACTATAA, GGATCGGAAGGGCCATATTAA, GTATGGTCTCTTGGGATAATT, TATCAGCTCAACAGGATTATT	8	6485, 77819, 19652, 60425, 5756, 44541, 75032, 29307	0.2075	1721	0.1388	2051	0	0	0	2
Slc43a3	CCTACAGATTGGGAACCTCTT, CCTCGTCATTAAGCTGCTTTA, CCTGGCATCCTTCATGAATAA, CCTTAAACAGAAGTATCAGAA, TCTAGCCTCGATGATGCCTTT	5	1645, 90813, 87777, 11670, 47026	0.2076	1722	0.1166	1734	0	0	1	1
Lamp1	CAAGTACAATGTTACTGGTAA, CCCACTGTATCCAAGTACAAT, GCAACATTTACTATGCACAAA, GCAGTTCTTGTGGTAAAGAAA, GCGTTCAACATCAGCCCAAAT	5	45828, 16865, 13599, 10031, 6584	0.2077	1723	0.1166	1733	0	0	0	1
Adap2	CCAGACATCAGCAAAGTTAAA, CCGCCTGCAATACCTGAAATT, CCTCAACGTGAAAGCCAAGTT, GAACGGAGGCTGCTCTATTAT, GCCTGGTCTTAAAGGAACAAT, GCTTAGAAGTCCTGAAGGGTT, GTTCACCTCAGCCCTAGTTGT	7	16667, 8000, 14387, 4134, 82863, 50283, 79970	0.2077	1724	0.133	1965	0	0	1	2
Dgkb	CAGACGTCATGCACCACTATT, CCAAATTTACACGGGCCTGAA, CCCATTCTAGCCCAAATGTAA, CCCTCCTGCATCAAGACATAT, CCTACCACAATCTGTCCAGTT, CCTCTGTGGTTATCAGAACAA, CGAGTTTATGTTTCGCCTTTA, GAAGCAAGGAGAACGAATTTA, GACCCTTGAAGGACCATATTT, GCAATGGAAATGGGCCAAATT, GCTACCTGTCTCTTCTCGAAA, GCTGCATGAATCTGTAGAAAT, GCTTGGAAGGAGCAATGGAAA	13	78649, 75703, 205, 45820, 48210, 48812, 38645, 13100, 76427, 34156, 29824, 26214, 5561	0.2078	1725	0.1703	2510	1	1	1	2
Spred3	CCCACTGAGAAGACTTAGAAT, CTTTGCCAAGACTGGTGCATT, GCCAGGTTTGGTTTACAACAA, TCACTGGGATTCCTGAACCTT	4	52027, 14134, 605, 16454	0.2078	1726	0.1002	1481	0	1	1	1
Wdr47	CGCTGAGTTTAAGGACTGGAA, CGTAATGAAGGGCCTACTTTA, GAGCAGGAGATTGTAACATTT, GCCCTTCTAAAGACGATTACA	4	30800, 12394, 5827, 50562	0.2078	1727	0.1002	1483	0	0	0	1
Elfn2	CCACCCTTACAGCAAGATGTA, CCTCTTGTTCAGAGAGGCTAT, CGACTCCAAGTACATTGAGAA, CGTCAATGTTAAGAAGACTAT, GCTACCAAAGGCAACTATATT	5	24042, 86133, 2290, 41423, 11467	0.2078	1728	0.1167	1738	0	0	1	1
Zfp341	CCATCTCTGTAGCAAGGACTT, CCCACAGGACAAAGTGTAAAT, CGACACAAATACCTCAAGGAT, GCTGGAGTCCTTGTGTGTTAA, GTCCCACATGATTCAGCACAA	5	10534, 28790, 5111, 48202, 34114	0.2079	1729	0.1167	1739	0	0	0	1
Cyct	CAAACAAGAACAAAGGTGTTA, CTTTGGTCGAAAGACAGGACA, GAAACACAAGACAGGTCCAAA, GTGAGAGAGAAGATCTCATTA, TATTTGGAGAACCCGAAGAAA	5	77034, 11348, 2670, 33093, 23979	0.2079	1730	0.1167	1736	0	0	1	1
Tac4	CAACGACGAGTTAGCAGTAAT, GAGCCTTCTTCCCTTTAGATT, GATTCCTGATGTTGCTACCAA, GCAAAGCTTCACACTCTGTAT, GTATCAGCTGGGACGTATAGT	5	46201, 6149, 63212, 48926, 10190	0.208	1731	0.1167	1737	0	0	0	1
Fancm	CTACATCGTAAGCAGCCGAAT, GATGAGCACTAAGTACAGAAT, GCCAATCAAGTGAAGAAGAAA, GTTAAGTAATACCAGCAAGAA	4	50891, 63947, 7870, 11736	0.2081	1732	0.1003	1488	0	0	0	1
Stc2	CGAGAACAACTCTTGTGAAAT, CGGAAGTTTAGTGTCGTGCAT, CGGTGTGATTGTGGAGATGAT, GCAGGAAGTGTCCAGCAATTA, TCGAGAACAACTCTTGTGAAA	5	4475, 10759, 70704, 83896, 37497	0.2081	1733	0.1168	1742	0	0	1	1
Dynll2	GAAGGACATTGCTGCCTATAT, GACATGTCTGAGGACATGCAA, GCCTATATCAAGAAGGAATTT, GCTATGTCACACACGAGACAA	4	91351, 13235, 3381, 18374	0.2082	1734	0.1003	1486	0	0	1	1
Meis3	ACTTAGAAGGAGAGTGGCATT, AGACCAGAATACTACATGGAT, CCACGACCTGTGCGACAACTT, CCCATGATTGACCAGTCTAAT	4	13839, 1588, 39072, 33889	0.2082	1735	0.1004	1489	0	0	1	1
Gypc	AGGGAAGTCCTACGGCATTAT, CAGGTATCATCTCACCAGCAT, CCAGCAAGAAGGAATACTTTA, CCCAAGACTCTTACTGCAGAA, GAGAGAACATCTGGATACCCA, GCCATAGTTGACACCCATTAA, TCATTGCAGCTGTGATCACTG, TCTCATGCTTCGCTACCTGTA	8	87658, 49698, 53874, 81738, 6603, 5599, 30454, 6568	0.2083	1736	0.1391	2058	0	0	0	3
Cacng5	CATTGGGTTTATCCTGAGCAA, CCATAGAGTATGTGATGCCCA, GAACAGCAACTACCCAGCTTT, GACCTATTTCAACTACAAGTA, TCTGAGCAACTGCTCCGATTA	5	24672, 49692, 59023, 7223, 9858	0.2084	1737	0.117	1745	0	0	0	2
Nr2c2	AGTGCCAAGCAGCTCATATTC, CCAACATAACAGAAGAACTTT, CCTCAGCGCATTCAGATTGTA, CCTGAGTGAATCTTTGAACAA, GCATGGCGAAACTGGATATAG, GCTATGAGTACGCATACCTTA, TATGAGTACGCATACCTTAAA, TCCCAGACAATAGCAACTAAA	8	71777, 61338, 35336, 8351, 76580, 52934, 269, 75606	0.2085	1738	0.1392	2059	1	1	1	2
Pou2f2	ACCCGACATTAACCATCAGAA, CAAGCTCTATGGCAACGACTT, CTTAGTAACCTCGCCTCTCTT, CTTCGCCTTAGAGAAGAGTTT, GAGCACAACAGTTACTACCTT	5	39626, 65442, 10492, 69983, 5333	0.2085	1739	0.1173	1746	0	0	0	1
Myl3	CAACCATGATGCTGACACCAT, CAATTCCAAGATGATGGATTT, CTCCAAGATTAAGATCGAGTT, GAGAAACTGATGGCTGGTCAA, TGATGCCTCCAAGATTAAGAT	5	10446, 5485, 86845, 85647, 23201	0.2085	1740	0.1174	1748	0	0	0	1
Adam6b	CCACAAGATAACCAGGTTAAT, CCAGTGGTGTATTTAAGAATA, GCAGACCTATCCAGAACATAT, GCCACTTTCAAGCAACCAATT, GCTCTCATATAGCTTGCATTT, GTACTGTAATGGGACTAAATA	6	6940, 80009, 83193, 16343, 87088, 8445	0.2087	1741	0.1302	1928	0	0	0	2
Olfr213	CACTGGCAAATCTCTCCTGTT, CCATGTCTGTTGAGATGCTGT, CTGGTCCAGTTGTGATGCTTT, GCAAACCTCTACATTATCCAA, GCACCTGAGAATCCTCTTCTT	5	10995, 26720, 58820, 3886, 21112	0.2088	1742	0.1175	1751	0	0	1	1
Naa20	CCTTCCAATGAGCAATAGCAT, CGTAAGAGTATCCAATCAAGT, GCAGTTGGGTTACAGTGTCTA, GCGGAGAACTAATGGGTTATA, GTTCCGCTTCAACAACATTAA	5	5906, 52171, 30475, 10327, 48707	0.2089	1743	0.1177	1753	0	0	0	1
Fbln7	CAAGACCATCTCCTTCCATTA, CCATGTATCCAAGGTCACCAT, CGGCAATATAAGCTACGTGAA, GTTTGAGATCTGGGCTGATTT	4	11635, 21264, 56239, 8352	0.209	1744	0.1011	1498	0	0	0	1
Hnrnpm	CAATCGCTTTGAGCCATATTC, CCACCCAGTATCCTAAATAAT, GCAGACATTCTGGAAGATAAA, GCCGAATAAATGAAATCCTAA, GCTGAAGTTCTAAACAAGCAT, GCTGGATGTATAAAGATGTTT	6	8680, 61161, 6283, 76002, 53456, 39567	0.209	1745	0.1305	1933	0	0	0	2
Vat1l	CCATGAATTTCGTCACCGCAT, GAGAGACCAAGAGTTTCTTTA, GCCTCTACTTTCAAGCATGAA, GCCTGTGGCTTAAACTTCATT, GCTCCCTTGAAGACAGTATTT	5	23317, 59548, 3688, 11077, 48519	0.2091	1746	0.1177	1754	0	0	1	1
Igtp	CAAAGGAATATCCGGGAGAAT, CCCTTAGAGATCATTTCTCAA, GCCCTTAGGTTCATTGGACAT, GCGGTGACAGAGGGAAATTTA, GCTGAGGCAACAGCTTGTAAT	5	61431, 32580, 11183, 3375, 17837	0.2091	1747	0.1178	1756	0	0	1	1
Prl3d2	GCAGATGTGTACAGGGAATTT, TGGGAGAATGTGTCCTCTAAA	2	7432, 17872	0.2091	1748	0.0428	652	0	0	0	1
Npepps	CCTGGGCCTCACTGCCTCTCT, CGAATGCTACATGACTACATT, GCCATGCTCGAAAGTTTATTA, GCCTGCTATCAAAGCAACTTT, GCCTTGTTACTTATAGGGAAA	5	62260, 81852, 87812, 10667, 4930	0.2092	1749	0.1178	1755	0	0	1	1
Defb2	AGTATTGGATACGAAGCAGAA, CTCCAGCTGTTGGAAGTTTAA, CTGCCACACCAATGGAGGGTA, GCCACACCAATGGAGGGTACT, TCCAGCTGTTGGAAGTTTAAA	5	46199, 55062, 8979, 9324, 49603	0.2093	1750	0.118	1758	0	0	0	2
Galnt11	CCTCTGAACTAGGTATGATTT, CCTGAGAGTTATGGACCTGAT, GCACGCCTTTAATATGCTCAT, GCCATAAATCAAGGTGCTTTA, GCTCAAGAGTAGGACACATTT	5	9789, 50066, 33621, 80535, 7586	0.2093	1751	0.118	1762	0	0	0	2
4930432K21Rik	CACTAACATGGAGCAGGGTTT, CAGGATCACTATTGCTCCCAT, CCACAGTTCAAGACAGTAGTA, CCACATATACTCTCAGCAGCA	4	3689, 13211, 51745, 32668	0.2093	1752	0.1012	1500	0	0	1	1
Gphn	CCATCATCAAAGCCAGGTTAT, CCCAACAATCAACCTGGGAAT, CCCTTCTTAGTATGCTTCATA, GCAAGAAAGGATCTCAGGAAT, GCATACAAGATAGTACCAGAT	5	40390, 4591, 88359, 60723, 10791	0.2093	1753	0.118	1759	0	0	1	1
Seh1l	CACCAATAATTGTGACACTTA, CCACGATGTGTCTTTCGACTT, CCTCTGTTACTGATGTGAAAT, CGATGTGTCTTTCGACTTCCA, GCAACCAAAGATGTAAGAATT	5	54817, 10905, 4260, 36838, 26847	0.2094	1754	0.118	1760	0	0	1	1
Ggct	CCGAAGTTACCTGATGACGAA, CGACGAAATGGAAGACATCAT, CGGCTTGTAAGAAGTAAGCAA, GCAGGACTTTAAGCTCGACTT, GCCACAGGAATATCAAGAGAA	5	10986, 60853, 74784, 4031, 51758	0.2095	1755	0.1183	1764	0	0	1	1
Slc7a15	CCTGTATGTCCTGGTCAATAT, GCAGACATTTAGTTGCTATTT, GCATGAAGAATGAGGATGGTA, GTCTTCTGTATTTGCGAATAA	4	1707, 19877, 20502, 13897	0.2097	1756	0.1013	1502	0	0	1	1
Olfr1256	CCTTACTGAAACTTGTTTGTA, GCCCTTGCACTATTCAACTAT, GCTCATCTCTTATGGTGTCAT, GCTGTTGATATTATCTTGGAT, GTGGGAAATCTGCTCATTGTT	5	24213, 10532, 5445, 85783, 84769	0.2098	1757	0.1187	1767	0	0	0	1
Sorbs3	CCAGCTAATTATGTGGAGGTT, CGAACTAGAAACTGGGCATAA, CGAAGAATGTTCCAGCAAATT, GCTTCGTCTTTGAACAACAAA, TGGCTCCAACACCCTTAATTT	5	25040, 6141, 35913, 10304, 21906	0.2098	1758	0.1187	1766	0	0	0	1
Tmprss7	CCAAGTTACTATCCTCCGAAA, CTCCATTGAATCCATCCAATT, CTTGGTAGAATATGGCGGTTA, GAAACCCTGAAACAGCTCATT, GCCCTGAAATTCTACAACTAT	5	9224, 25634, 76808, 9280, 11666	0.2099	1759	0.1189	1768	0	0	0	2
Fancl	CAGCTCAAGAAGGCAAGATTA, CCTACCATGCTTCCTGAGTTT, GCACCTAATCACTGTCAAGTT, GCTCCTTGGTAGATGTTTATA, GCTCGTAGTATCTTGGAAGAA	5	15468, 77251, 9691, 11647, 8005	0.21	1760	0.119	1770	0	0	0	2
2810453I06Rik	CTTTATCACAGAGTTCTAAAT, GCTCCTTCAGAAGAGCAACTA, GCTTGCCATTTCTGCACTGTA, GTCAGAACTGTCTCACCGATA, GTGTCCCTTGACCGTTTCAAT, TGATTGATGTGCTCCGTATAA, TGCATCATGGTGGCTTCAAAG	7	7364, 51695, 22925, 6359, 52996, 25447, 20500	0.2101	1761	0.1359	2004	0	0	0	2
Adamts12	CCAGTGTTTAATGCAGCACAT, CCCTGGTATCAAGTATGAGTA, CGGCTCATTCTACTTGAAGAA, CGGTGAGAAGAAGTGGTGTAT, GCAGGAAGAGTGCTGATTTAA	5	7563, 23277, 58520, 27053, 9843	0.2101	1762	0.119	1769	0	0	0	2
Cyp2r1	CCTCAAGCAACTGATAACAAA, CTTCAGCAATTTCATTTGCAT, GAGGCTTACTCAATTCCAGAT, GCATATCAACTGTCGTTCTAA, GCTCCAGTCTTCCTTTATAAT	5	15334, 73705, 11026, 69549, 4074	0.2104	1763	0.1198	1776	0	0	1	1
Nrxn2	CCCGGCAGGAAACTTTGATAA, CCCTACATGGACCAATGCAAA, CGCAAGGTCAATGATGGTGAA, CGTTCGTTTATTTCCCTCGAT, GCCCGAAATCTGGATCTCAAA	5	74250, 1449, 77676, 28833, 11903	0.2104	1764	0.1198	1775	0	0	1	1
Hfm1	AGTGAAACTTACCCAAACGAA, CACGTTCACTTTCAGAGATAA, CATATTCAAAGCACCATCATT, CGTCAGTATTCTACAAACAAA, GCCCAGTGAAACTTACCCAAA	5	9301, 67290, 9259, 14251, 53533	0.2105	1765	0.1198	1777	0	0	0	2
Pigt	CCCTCTCTTCAACACCTTGTT, CGGTCTCTCAGTGCTATTGAA, GCAAGGAGAATAAACCAAGTT, GCTGTACAACTCCCATCCTTA	4	2251, 43006, 13789, 81138	0.2107	1766	0.1022	1513	0	0	1	1
Cox6b1	AGAACCAGACTAAGAACTGTT, CCAGACTAAGAACTGTTGGCA, CGCATAGCTGAAGGCACATTT, GCCTGGGATGACCGCATAGCT, TCCACCGCTGTGAGAAGGCAA	5	2787, 65623, 29097, 57568, 11477	0.2108	1767	0.1202	1779	0	0	1	1
Pecr	CAAGAGGATAAAGGAATCTTT, CGGAGGGTCGATTGTCAATAT, GCTGTTGACAACTATGGCGAA, GTATGGTAAGATCAACTTCTT	4	87596, 14135, 1238, 69667	0.2108	1768	0.1022	1515	0	0	1	1
Frzb	CAACTATGTCATCCGGGCTAA, CCACTTACTGTCAATGAGGAA, CGAGCCCATTCTCATCAAGTA, CTTCTTCCTCTGTGCAATGTA, GAACATGACCAAGATGCCCAA, GAGGTAAAGATGAAATGTCAT, GATATGAAACTCCGACACCTT, GCTAGCGATTCCACTCAGAAT, TCCCTGGAACATGACCAAGAT, TGTGCAATGTACGCACCCATT	10	24587, 42164, 50887, 5692, 82193, 20853, 24571, 22102, 4694, 5984	0.2109	1769	0.1622	2382	0	0	1	3
Tbce	ACAAAGCAGAGGAGATCATTA, AGATATCAGAATGGTCATTTA, ATCAACCTGAACGGCAAATAT, CCAACCGTAAGAGTTTAACGA, CCAACTCTAACTAGAACATTT, CCCAATATTCGAGTTGTAAAT, CCTTTGGAAATGAATGGAGAA, CTTTGGAAATGAATGGAGAAA, GCCACGAAGGTACTATGTATT, TCTGAAGACTTTAGTCCTAAA, TTCGTCCAAGCAAAGTTAATT, TTTACCTCAAGTCTAACAATA	12	24151, 31574, 65666, 82464, 5000, 3358, 44800, 88588, 46338, 85548, 45392, 47412	0.2109	1770	0.1635	2410	0	0	2	2
Efna2	AGAGCCCATCTTCACCAGTAA, CCAACCAATGAGACCCTGTAT, CCTCAAGTTCTCAGAGAAGTT, CGCTGACCGATACGCAGTCTA, TCAAGGTTTATGTGCGTCCAA	5	1943, 85564, 11772, 84010, 21303	0.211	1771	0.1205	1784	0	0	1	1
Klk1b24	CCCAATGAGAACTGTACCAAA, CGCAACCTAAGGACAAGAGCA, CGTGTGGTTGGAGGATTCAAA, CTGAATGATGACATCCCGCAA, GAACTGTACCAAACCCTACTT	5	68444, 55483, 65865, 11646, 2325	0.211	1772	0.1205	1787	0	0	1	1
Ivl	AGCCAGAACTGTACCTGAGAA, CTGTGTGTTCTCCAGATCATA, GAGATTCAAGAGAAGGGCTTT, GCCAGAACTGTACCTGAGAAA, GCCAGAATTACACCTAGGAAA	5	17331, 23185, 12362, 24239, 179	0.2111	1773	0.1205	1783	1	1	1	1
Mterfd2	CAGAGTTTCTGAAGCTGAGTT, CCAGTATGCATATTTCAGGAT, GATGGGACTCACACATCTAGA, GCTAGAATACAAATTCCAGTA	4	60191, 11182, 10142, 65055	0.2111	1774	0.1023	1518	0	0	0	0
Trub2	CAACTGCTTAAAGGTCTCAAT, GACGGCTGATAGAGAAGACAA, GCCCTGTGATACAATGCTGTA, GCCTATGAGATGGCTGTGCAA, GCTACAGACAACTTCTGTGAA	5	47006, 10250, 67320, 19224, 6531	0.2111	1775	0.1206	1790	0	0	0	1
Ccr9	CCACAGATGACTACATGAATT, CCCAACAGTTTACAACCTTTA, CCCAGTGGGTTTCATTCACAA, CCCTAAGGATAAGAATGCCAA, CTGCACTATTTCCACCAATAT	5	9398, 86297, 42126, 73594, 9090	0.2112	1776	0.1206	1789	0	0	0	2
Krtap16-5	CCAGTAACTCAGCATTTGATA, CCTTCATGCTGTGGAGGATAT, CTGAGAAATCCTAGCCATGAA, GCATTTGATACCTTCACTGTT	4	7268, 12149, 71076, 71166	0.2112	1777	0.1023	1517	0	0	0	1
Blvra	CATATAAGCATCCACTTCAAA, CCAGCCACGAAGACTATATAA, CCTTGATAATGTACGGCAGAT, GAGGTTGATGTCGCCTATATT, GCCAAATGTAGGAGTCAATAA	5	5693, 41284, 10535, 16809, 10542	0.2112	1778	0.1208	1792	0	0	0	1
Glyatl3	ATGAACATAAATCGTGGAAAT, GACCATTACACTAATGCATAT, GCTGTTAGATTTGGATATAAA, GGGTTGCAAAGTGAATTATAT, TGGAAGAACATGATGTTATTA	5	2450, 11617, 14114, 44415, 86324	0.2113	1779	0.1208	1793	0	0	1	1
Atp11c	CCAGGGTACATAGCCATCAAA, CCTGAGATTCTCCTAATAGTT, CGTAAGAAGTTGCTGCATGAA, GCCTATGTTATTGTCCTACAA, GCTTTGAACTACCAAGGGAAA	5	36089, 11812, 84242, 1865, 89264	0.2113	1780	0.1208	1794	0	0	1	1
Mkl2	CACATCTCTCATGGTGTTGAA, CACTTACCCACTCTGAACGAA, CCCAAGAATCCAAACGACAAA, CCTCATAAAGAGTGGAGAGAT, CCTTTAATACATCAGATCCTA, GAAGCCTCATTTGCCACTAGT, GCAGTGAAGATAGAGAGTCTT, GCCAGTCACAACACTGCATAA, GCCTCATTTGCCACTAGTCTT	9	5832, 6204, 58938, 51517, 5763, 45074, 32018, 34035, 31314	0.2115	1781	0.154	2250	0	0	0	3
Gga1	CCAGAGTTCCATGCTCCATTA, CCAGGTGATCAACCTGTACAA, CCTCCGCTACAAGCTCATCTT, CGGCCCAAGAATGTGATCTTT, GCTGCCAATAAGCTCATCAAA	5	2527, 89515, 52649, 71356, 11605	0.2115	1782	0.121	1795	0	0	1	1
Prr18	CAAGTACGATGATGAGGAGTA, CCCATTAACTGGAGGATGATT, GAGAAGCACAAGTACGATGAT, GCAAGTCAATAACCAGTTTAA, GCACAAGTACGATGATGAGGA	5	49020, 68467, 7024, 66073, 10106	0.2115	1783	0.121	1797	0	0	0	1
Kirrel	CCACACTTAGTCGTTGCTTAT, CCCACCAATGGTTATTACAAT, CCCGGATTGTAGTTTACCCAA, GCTCACCATTAATAATGTCAT, TCCCTGACATTCAGGGACATT	5	83217, 7226, 43220, 10039, 80082	0.2115	1784	0.121	1796	0	0	0	1
BC080695	CCTCTCTTTCTTTCTACCTAA, GCACACTGTAAGGAAGATCTT, GCTGTGTGAAGATGCAGATTA	3	41356, 3606, 15902	0.2117	1785	0.0789	1187	0	0	1	1
9430007A20Rik	CCCATTCCTAACCAAGGATTT, CCTGTGAAGTTTCGGATTCTA, CCTTGTTGAGTAGAACAGATA, CGGATTCTACACTTCTGCTTT, CGTGATGATGTCTTGCTCTAT	5	6773, 10207, 72122, 16127, 75696	0.2118	1786	0.1213	1803	0	0	0	1
Map2k3	AGCACTTACCTACAGCCATAA, CATCACTATCGGAGACAGAAA, CCCATTCTTCACCTTGCACAA, CCTGGATAAGTTCTACCGGAA, GCATGTGAAGATGTGCGACTT, GCTGATGGAACACCCATTCTT, TGAATCAGAAGGGCTACAATG	7	51781, 7966, 4787, 55931, 65485, 11119, 61437	0.2118	1787	0.1378	2040	0	0	1	2
Dapk3	CCACGCAGTTCCTCAAACAAA, CCCAACATCATAACACTGCAT, CGCATTAAGCTCATCGACTTT, GCAGTGAACTATGACTTTGAT, GCATGACGTGTTCGAGAACAA	5	3920, 79959, 54320, 11162, 55189	0.2118	1788	0.1213	1802	0	0	1	1
Strbp	CCCTCTAATTAGGGACGAATT, CCTATTCAGATTCAGAAACTA, GCACTTAGACTATCAGCCTTT, GCTGAGATATAGTGACTGTAA, GCTTGCTGATTAAAGATGATA	5	7344, 10021, 42139, 16013, 89874	0.2119	1789	0.1213	1804	0	0	0	1
Pcsk6	CCCAGCAGAGAAGAGTGTATT, CCGGACTTTATGCTGATGAAA, GCTGAAAGAATGGAGCCTCAT, GTGCTTGAACTGTGTCCACTT, GTGTCGAAGATGTGAGGAGAA	5	81520, 25523, 2540, 11624, 91113	0.2119	1790	0.1213	1801	0	0	1	1
Opn4	CCACCTTTCTTTGGTTGGAGT, CCTAGAAGATGGAGAACTCAA, CTCTACAAGAAGTGGCTCTTT, CTTTGGCATCACTTCCATGAT, GTCGCACTGATTGTCATTCTT	5	36430, 7192, 42075, 10079, 40432	0.212	1791	0.1213	1800	0	0	0	1
Supv3l1	CCTGGCTTTATTGAAGGACAT, CGCTGTCCAATCTCATTGATA, GCAGCTCATGTGGACGATTTA, GCCGAGCAGATTGAGATGTTT	4	6659, 45327, 19867, 12420	0.2122	1792	0.1033	1531	0	0	0	1
Socs4	ATCTGAAGGAATACCATTATA, ATTCAGCGCAGGAAGATTATT, CATTCCTGTGGGCATAGATTT, CCCTGTTTCTCACATACCAAT, CCTTCGCCTATGAAATTGTAT, CTAATCTATGCTATCAGTATT, GCATATTTGCAGAACGGTTAT, GCTAATCTATGCTATCAGTAT, GCTAGAATTGAGCAGTGGAAT, TATTTGCAGAACGGTTATTTG	10	24215, 775, 15560, 58642, 68980, 19989, 66041, 51431, 85610, 7044	0.2122	1793	0.1639	2414	0	1	1	2
Crygs	CAGACAGTATCTTCTGGATAA, CCTTCTATCATGGAGCAGTTT, CGACTTCAACGGTCAGATGTA, TCCTTCTATCATGGAGCAGTT, TGTGTATGAAAGGCCCAACTT	5	10663, 48056, 5490, 36709, 11404	0.2123	1794	0.1218	1806	0	0	0	1
Olfr1062	CAGCCATTGTTGTGACACCTT, CCTTCCAGAAACTGTTGTATT, CTTCTCTTCATGTATCTACAA, GCAAACTCCCATGTACTTCTT, GCCATTGTTGTGACACCTTGT, GTCAACTTCTTAGTCAGTAAA, GTGTGTTCTCTGTTTCTTATT, GTTTCTTATTGCTCTTCCAAT	8	34985, 6660, 45805, 79694, 5815, 74497, 48336, 68849	0.2124	1795	0.1431	2114	0	0	0	2
Zfp639	AGGACAAATTGACGATCTTAA, CAGGACAAATTGACGATCTTA, CCACCAGCTAAACTCTGTAAA, CGTGGCTATCGAGCATACTAA, CTCAAGAGGAGAGCCCTATAG, CTTCTCATTGAACACGCCAAA, CTTTACACCCTTCTCGCTATT, GACAGCAAATGACTTGCCCAA, GATTTACTTATGCCAATATTG, GGACAAATTGACGATCTTAAA, GGATTTACTTATGCCAATATT, GTGGCTATCGAGCATACTAAA	12	33406, 65132, 36811, 62448, 73571, 39233, 44927, 80630, 2693, 57541, 59002, 5265	0.2124	1796	0.1658	2448	0	0	1	2
Olfr1208	CAAGGCAATATGTGCTGTGTT, CCTTTGTTGCATTGGTCATTT, CGTTGTATTCATGTTCTTCTT, CTGACACAAGACTCCTGGTTA, CTTACTATCAAGGGCAGTCAA	5	38021, 87476, 70715, 6870, 10219	0.2125	1797	0.1221	1808	0	0	0	1
Efemp2	CCCGAATGTGTGGACATAGAT, CTTCTACATTAGGCAAATCAA, GTACTGAGACTCACGGTCTTT, TGCCTACAATGCCTTTCAGAT	4	13045, 52321, 4897, 49507	0.2127	1798	0.1041	1543	0	0	1	1
Sardh	CACCGAGAAGAGTGTTCCTTA, CGATGAGTACACCTTCGACTT, CGGAGAGCTGACTTTGGATTT, GCAAGGCCTATGGTATAGAAT, GCAGAGACCAAGAGTCTATAT	5	75947, 741, 45918, 74237, 12277	0.2128	1799	0.1221	1807	0	1	1	1
Zfp60	CCAGACGATTCATAATGGAAA, CCCTGGCTATAGTGTAATCAA, CCGTACCAACTCACTCAACAT, GCCTTGTGGAACATAGGATTA, GCTGGTATGAAACCGTATAAA, GTATCCATGCTGTCGTGAAAC	6	26740, 90333, 7294, 8538, 49177, 91516	0.2128	1800	0.135	1997	0	0	0	2
Matn2	ATTTGCTCTTAACAGCGATAA, CATGCTCAAAGATTGACTATT, CCACATGAAATACATGGGCAA, CGGTGTACTGTGGACATAATT, GCAAAGGTCAAGGAGTTCATT, GCCAATGGTATCACTATGTAT, GTGTCAACACCTATGACTATG, TCAGCACAATGGGCGAAATAA	8	56379, 66356, 89178, 46375, 17211, 4792, 7026, 63303	0.213	1801	0.144	2126	0	0	1	2
Ppp1r8	CCACACCTTCCTTACTGATTT, CCATCGATTCTACGGTCTCAT, CCTGGTGAACAGGAAGACTAT, GCGGATTTCAACCCTCACTAT, GCTAATTGAGAAGCTGATTAT	5	4676, 19184, 77124, 10978, 32412	0.213	1802	0.1222	1809	0	0	1	1
Ube2s	AGATAAGAAGCTGGCAGCCAA, CAAGGGCTACTTCCTGACTAA, CCACATCATCCGCCTAGTGTA, CCCAATGAGGAGGATCTCACA, CGTCTGCTCACAGAAATCCAT, CTAGTGTACAAGGAGGTGACA, CTGTTCCGTATGAAGCTCCTA, GACCCACCTGATGGCATTAAA, GCGAGCACTGAGGCGACTGTA, TGGAGGTCTGTTCCGTATGAA	10	51514, 5219, 66319, 5592, 28264, 53240, 57074, 26371, 62953, 29773	0.213	1803	0.1656	2439	0	0	0	2
Nfatc2ip	CCTCAACCTCATTCCAGATAA, GAAGTGAACAAGCGTCTCCAA, GCGCTGTTGAAATCCTGATTT, GTGTCTCCAAACAGGATTCTT, TCAACCTCATTCCAGATAATT	5	10944, 35685, 6650, 17370, 10329	0.2132	1804	0.1225	1814	0	0	0	1
Nupl1	ACAGGCCTCTTTGGATCTAAG, ATGATCTATCCTAGTACTAAT, CAGGAGTTAAAGAATGCCGAA, CTTTAGTACCTCATCAGATAA, GAGTTAAAGAATGCCGAAATA, GCCGCACAACTTCAATCTATT, GCTGACTACTTCAGAATATTG, TGCATCTCGGGAGATTTATAA, TGCCACTCAAGCCAGTAATTC	9	34127, 11633, 48026, 25481, 48347, 1333, 7371, 70030, 64617	0.2132	1805	0.156	2285	0	0	1	2
Rreb1	ACTACCCATTCACGGTCAAAG, CCAGTGTGTTTCAAGGAGTTT, CCCACTCAGATAACCCACTAA, CCCATGATCTTCTAAGTCAAA, CCTGAGAAGAAACGGGCTTAT, GATCAGTCTTCCGCCACTTTC, GCTTCCATGATTTAGGGTTTA, GGACAAGATGAGCGATGAAAT, TGAGCGAACCTTCACCTTAAA, TGCAACATCTGTGACTATATT, TTCAGTGCCTTAACTACTTAT	11	33517, 58182, 55859, 8059, 86958, 17351, 43257, 6459, 18909, 76350, 616	0.2133	1806	0.1646	2423	0	1	1	3
Lamc3	CCAGTCATACTGACCCTCCAA, CCCGGCTTTGTGGGCTATAAA, CCCTGGCATTTCTTCCTGATA, CCCTTTATGCAGCTACGCAAT, CCTGAAGCAATGAACTTCCAA	5	9970, 62078, 7760, 22394, 76552	0.2133	1807	0.1226	1816	0	0	0	2
Prex2	ACCTCATTTATCAGATCCAAA, CACCTCCAGTAGGAGAAGAAT, CCACCGAATACCACATCTAAA, CCGAAGACAAAGAGATGCAAA, CCGGCTGATCACCTCATTTAT, CTAGAGCAAACCATCACTTTA, GCCTTTGAGCAGACCAAGTAT, GCTGCCTTAAACCAGATGTTT	8	8304, 52603, 20372, 20212, 46510, 70420, 1017, 38371	0.2135	1808	0.1447	2134	0	0	1	2
Lrrc66	CCCGCAAGAGAAGTAAGCATT, CGCAAAGGATTCCAGAGAAAT, CTCAGATAATGCCTACTCAAA, CTGACAAATGTGGGCTCTATT, GCTCAGATAATGCCTACTCAA	5	56866, 4136, 47362, 11192, 17042	0.2136	1809	0.1229	1818	0	0	1	1
Vmn1r237	CAATGCAGTATTACTCTCTAT, CCATTATCTGATGCTTTACTA, GCCAAGTCTCCCAGTTACATT, GCCCTGTCATTCTTAGTAAAT, GTGTCTGCCTTTGGGTTGAAA	5	28803, 9851, 70498, 12660, 8170	0.2136	1810	0.1229	1819	0	0	0	2
BC053393	CCCAGATTTGTCATTGCCATA, CCTTGCTATTGGACTCTCCAT, GCTCTTATCCTGAATCTCGTA, GTGTTTCTAAGATCAGAACTT	4	18829, 9402, 55897, 11610	0.2137	1811	0.1048	1555	0	0	0	1
Pomt2	CCTCACTCTATCCCAGTACAT, CCTGGACTTAACTAAATACTA, CTGGCACTGGCCTATCAATTA, GCAGCAGGTTACCACCTATTT, GCATGTTGACAGGTATCCTAT, GCTCCATTACTTCCCTTTCTT, GTCACTGGCTATGGCATAAAT, TACCTGTACTCCGTACCTAAA	8	21311, 60990, 70233, 2365, 43411, 7865, 42772, 13270	0.2137	1812	0.1448	2138	0	0	1	2
Kctd16	CAGAAAGATACACCTCCAGAT, CGGAAGAATTTCCTTGGCAAA, GAAGTCATAGAGCTGAATGTT, GTTCCGTTATATTCTGGACTA	4	13880, 66838, 23424, 2605	0.2138	1813	0.1048	1553	0	0	1	1
Tk1	CATTGTGGATTTCTGTGAAAT, CCAGTACAAGTGCCTGGTCAT, CCGCCTGTGCTACTTTAAGAA, CCTACAATACAACTCTGCCAA, CCTCTCAGCAAGTCCTACAAT, CCTGGTCATCAAGTATGCCAA, CGAGGGCAAGACAGTAATTGT, CGCTGTGTGCATGGAGTGCTT, CTCAGACAACAAGAACTGTCT, GAGAAAGAGGTGGAGGTGATT	10	45614, 21948, 61410, 14660, 6017, 62494, 71697, 67344, 4022, 74085	0.2138	1814	0.1668	2459	0	0	1	2
Gpr1	CCTAGCATTTGTTCTGGGCAT, CCTTTCAGATTAGGTTGCATT, CGTCCTAATAAGCAAGACGTT, GCCATCGCAGACTTCATCTTT, GCTGCTTGAATCCCATCCTTT	5	11773, 27360, 2442, 15030, 15704	0.2139	1815	0.123	1821	0	0	1	1
Aldh1l2	CGATACAACTAAACACACAAA, CGCTTTATAACCGGTTCCTTT, CGGCCCTAAATTGATGAGATT, GACACTAATCATGGGAGATAA	4	6604, 22046, 81315, 12564	0.214	1816	0.1048	1554	0	0	0	1
Hnf1b	CGACAATCAGTCACCATGGTA, CGACTATGACACTCCTCCCAT, CGGTCATTAACAGTGTGGCTA, GCAATCTCAGAACCTCATCAT, GCTACAGAACTCCCACATGTA	5	4399, 44218, 83124, 11132, 37210	0.2141	1817	0.123	1820	0	0	1	1
Mospd1	CCAAATAAGTATGTTGTCGTT, CCTTGATGTATTAAGGAGAAA, CGTCTCTTCAGGACCTAGTTT, GAAGGGAATCTTCCTGTCTTT, GCTGCTTATATCTTAGGTCTT	5	28486, 74733, 70168, 8906, 9632	0.2141	1818	0.123	1823	0	0	0	2
Olfr815	CCGCTATATTGCCATCTGCAA, CCTCAGTTACAGACTCTGATT, CCTCCGTAATTTCTCTTTCTT, GCTTCAAATGTCATTGACCAT	4	180, 14720, 51242, 33754	0.2142	1819	0.105	1558	1	1	1	1
Ramp3	CCACTGTTGTTGCTGCTTTGT, CCAGAGCTTCATCACTGGAAT, CCTAGTTTCTAGCCGTTTCTT, CTTCGCTGACATGATGCAGAA, GTCGGAGTTCATCGTGTATTA	5	70797, 44155, 35911, 8585, 9757	0.2144	1820	0.1237	1834	0	0	0	2
1700019G17Rik	CCACAAGGTTAATGGGTCTTT, GACCAGTACTTTGTGAGCATA, GCTTTCTTGGAGAAATTACGT, GTGACCATAGTCCTAGTGTCT	4	49344, 29131, 11998, 8391	0.2144	1821	0.1052	1563	0	0	0	1
Xrcc2	CCCAACCTGTTTGCTGATGAA, CTCATTAGTTTCACGTCATTT, GACTGCAAATAGAAGTCTTAT, GATTACCACTTTGACATGCTA, GCAGCCGGTTCTCATTAGTTT	5	44015, 8537, 65575, 47434, 9778	0.2145	1822	0.1237	1835	0	0	0	2
Bid	CCACACGACTGTCAACTTTAT, GCCAGACATCTCGCCCAAATA, GCTCCTTCAACCAAGGAAGAA, GCTGATAATGACCATGCTGTT	4	195, 14734, 68432, 52214	0.2145	1823	0.1052	1559	1	1	1	1
Shpk	AGAATCATCCAAGCCCTAAAT, CAGATGCATGGCATCCTATTT, CCACTGTGTATTCACGCATGA, GCAGGATGTGACTAGAATCAT, GCTGGCACCATTCAAGATTAT, GCTGGGAATCTTACCTAATTG, GCTTCCTTTCCAACAGCTCAA, TGGCCGTTGTAACAGTAGTTT	8	77225, 24200, 7905, 72502, 56938, 2339, 47680, 78324	0.2145	1824	0.1466	2163	0	0	1	2
Spns3	CAGGCTCAATCCTACCTACAT, CATCTGTGCTTCTAGTCTGTT, GACCGTGGCAACTGGTATTAT, GCAGCAAGCTATTCCACCATT, GTTCTCTGTTACATCAACCTT	5	65197, 4027, 13200, 24744, 11285	0.2145	1825	0.124	1837	0	0	1	1
Rab34	ATCGTTGTGGGAGACCTATCT, CCAAGAGATTAAGGCCGAGTA, CCTGGACATTTGCACTGACTT, CGGCACATTGCAGATGTTGTT, CGTGGGATTTAAGATATCCAA, CTGCAAAGACACCTTCGATAA, GACAGGCACCGTGGGATTTAA, GCACTAACCTTTGAGGCCAAT, GGCTACCATCGGAGTGGATTT, GGGAAGACCTGTCTCATTAAT, TGAGTACTCCTGCTCAGTATT	11	64742, 69382, 89608, 29676, 73190, 51784, 42008, 6152, 1656, 30016, 72822	0.2145	1826	0.1659	2449	0	0	1	2
Cd226	CCTAAGACAAACAAGGAGCAA, CCTCATCATTCCAAATGCCAT, GACAAGATGTCACACTCACTT, GATACACTTCAAAGTACCTAA, GCTTCCTGTAACCTATCTCAA	5	89109, 64275, 6735, 10383, 45955	0.2146	1827	0.124	1839	0	0	0	1
Usp1	AGAGCCTTAGACTTTACTGAT, CAGTGACCAAACAGGCGTTAA, CCAGAGAAATATACAGATGAA, CCGACAATAGAAATTCTGAAA, CCTCTTAAACTGTCACTAGAA	5	18882, 46546, 11387, 42081, 3735	0.2146	1828	0.124	1838	0	0	1	1
Ctgf	CAGGAAGATGTACGGAGACAT, CCCAACTATGATGCGAGCCAA, GCAGGTGATAAAGCTATGTAT, GCTGCAAATACCAATGCACTT, TGTGAAGACATACAGGGCTAA	5	51172, 39435, 1371, 12178, 81088	0.2147	1829	0.124	1841	0	0	1	1
Cox7a2l	CAGAAGCACCACCTATCATAT, CCACTTGGATAGTCTACTTAA, CCTCGCAGCCCAGAAACAAAT, CCTTCCAGACCAAATGCTTTA, CTATCATATTTGCCACACCAA, GCTGATGGTTTCCACCTGAAA, GGCTGATGGTTTCCACCTGAA, GTGTGACAGCATATGATTATT	8	8416, 830, 42485, 52779, 33887, 16783, 29238, 54763	0.2147	1830	0.1466	2162	0	1	1	2
Il9	CCAATGCCACACAGAAATCAA, CCGTCCCAACTGATGATTGTA, GACACCAATTACCTTATTGAA, GCAGGCAACACACTGTCATTT, TGAAGGATGATCCACCGTCAA	5	12402, 77910, 76461, 706, 90405	0.2147	1831	0.124	1836	0	1	1	1
Dnajc5	AGGAGACAGAATTCTACGTAT, CCATGTTCTTGGACTGGACAA, GAATGCAACCTCAGATGACAT, GATTAACAACGCACACGCCAT, GCTGTTGCTTTAACTGCTGCT	5	3312, 51984, 11547, 52889, 81718	0.2149	1832	0.1247	1844	0	0	1	1
C630004H02Rik	CAGTACCAGTTTGATGGCAAT, CCAGTACCAGTTTGATGGCAA, GCAGATTTGCTCATTGTGGTA, GCCCAACTACATCCATGACAT	4	40070, 11799, 21140, 9100	0.215	1833	0.1056	1571	0	0	0	1
Serpinb6b	CACCAGGGATTCCAATCACTT, CCTTCAATACTGAAGTAACTT, CCTTTCAATGTCACCAAGGAT, CTTCGGGTTCAGTAAATTCAA, GCATCTAAAGAAGGCTTGTTT	5	53483, 7037, 10308, 89326, 86388	0.215	1834	0.1248	1846	0	0	0	1
A330041J22Rik	CAGGAATGAGAAAGTATGTCT, GCACATAAGAGTATCCCAGTA, GCTGGAGATTTGGTCAATGTA, GTCTACAGGAATGAGAAAGTA, GTGATAAAGCACATAAGAGTA	5	42991, 22862, 3225, 11581, 26502	0.215	1835	0.1248	1845	0	0	1	1
Tbca	CAAGATCAAGACCGGAGTAGT, GATCTTCAGCAGATATTAGAA, GATGGAGAGAACTACGCCATT, GTATAAAGAAGCCCGTGTAGT, GTTAGAGGCTGCATATACTGA	5	5741, 27187, 74148, 40777, 10744	0.2151	1836	0.1249	1848	0	0	0	1
Atp8a2	CCTCTTCATAAACTGGGACAT, CGCATAATTTACCTCAACCAA, CGGATGACTTCTTGTACCAAT, GCATAATTTACCTCAACCAAT, GCTACCAACAACTCAGATTAT	5	9815, 8541, 33600, 37303, 65538	0.2151	1837	0.1251	1854	0	0	0	2
Vip	CCAATCAAACGACACTCTGAT, CCTATTATGATGTGTCAAGAA, CTGGGTCAGATTTCTGCCAAA, GATACTCTTCAGTGTGCTGTT, GCGTGTGCTATGGATGTGTAA	5	11901, 79569, 72951, 2305, 39146	0.2153	1838	0.1253	1858	0	0	1	1
Ddr1	GAGATCTCTTTCATCTCAGAT, GATTCCACTTACGATGGATAT, GCCACGCTGAACTTTGTGCAT, GCCCACAATCAGCTACCCTAT, GCTGCTACTCTTGGTGACAAT	5	44652, 660, 12451, 19825, 54462	0.2153	1839	0.1253	1856	0	1	1	1
Cox11	CCGTTTGAAGCTGGACAGTAT, CCTGTCAAGGACCGGGTCATT, CGACCTCATCACTCTTTCTTA, GCACCTTCATTTATCCCACTT, GTCACCTTCAATGCTGACGTT	5	4005, 54545, 11337, 62476, 42976	0.2153	1840	0.1253	1857	0	0	1	1
E2f2	CCACCTACTACACTTCGCTTT, CCGAAGATAATGCCAACAAGA, GAGACCATAGAGCCTTCAGTA, GCAGGGAGATTTGTTCTAGTT, GCTCCTGACCAAGAAGTTCAT	5	41457, 11991, 2051, 90527, 56023	0.2153	1841	0.1253	1859	0	0	1	1
Tnfrsf12a	CACAAAGCGACCCATACTAAG, CCCATAGAGGAGACTGGTGGA, CCGCAGATCCTCGTGTTGGGA, CCTCGTGTTGGGATTCGGCTT, CTTCAGGCTACTGTGGCCCAT, GCTGGTTTCTAGTTTCCTGGT, TCGTCGTCCATTCATTCATTC	7	90840, 1482, 9229, 76673, 57175, 40661, 59313	0.2154	1842	0.1427	2112	0	0	1	2
Notch3	CCGGGAGATCACAGATCACTT, CGTGTGTAGACGGTGTCAATA, GCATTCCAGATAAGACGTGTA, GTGACAGTTGTGAGGATAATA, GTGTGAATACACAGGGCTCAT	5	20583, 67645, 10626, 6161, 56906	0.2154	1843	0.1254	1862	0	0	0	1
S100g	GAGAAGTTAGTTACGAAGAAT, GCCTCCTGAAGGCTTCAAGTA, GCTGCTGATTCAGTCAGAGTT, GCTTCAAGTACTCTGGACAAT, GTTACGAAGAATTCGAAGCTT	5	38876, 13795, 12509, 61065, 546	0.2156	1844	0.1255	1863	0	1	1	1
Adamts7	GAGGACTGTGAACTGGTTGAA, GCCTAAGAACAGAGGCAAGTA, GCGATCAGTCAGCAAAGAGAA, GTGCGCCTTATCATACTGGAA, GTGGCAGAAGAACATTAACAT	5	9971, 18675, 22360, 8208, 80477	0.2159	1845	0.1258	1867	0	0	0	2
Spin1	CCATATTTACGTCTACGATTT, CCTGTGAATCCTTCCCTGTAT, CGATTTCCATATTTACGTCTA, GATGGATTTGACTGTGTTTAT, GCGGACACAATGATCGGCAAA	5	1585, 12180, 57793, 35313, 62822	0.2159	1846	0.1258	1866	0	0	1	1
Cdc42se1	CCCATGCTTCTGTAGTATTAA, CGCTCGGAATTTCAGACCTTA, CTTGCCATGACAGGTGCAGTT, CTTTGTCCACCTGACTCACAT, GATGAGATCCAAGGGAAACCA, GGAGCAATTCTAGGGCCTTGT, GTGACAGACCGTGGAGCAATT	7	70514, 87283, 72357, 9883, 6847, 7469, 63547	0.216	1847	0.1435	2120	0	0	0	3
Bcdin3d	CCGTTCGGAAATTTCCCTCAT, GACACACACCAGTAAAGAGAT, GCATGTCAGTAACCATGTGGA	3	41568, 15766, 5097	0.2162	1848	0.0816	1224	0	0	0	1
Wdr64	CCCAAACAAGTGACTTCATTT, GCACAACAAATGGCATGATAA, GCCATGCCTTACCTACAATAT, GCTCTGAAGTACAAAGAGATT	4	3187, 29753, 13854, 42700	0.2162	1849	0.1065	1582	0	0	1	1
Fam5b	CCGATGGAAAGTGAACAACTT, CCGGATGCTATCCGAGATTTA, GCCTGTTAATGAGGGCAACTT, GCTGACATTCAGGCTATGGAA	4	937, 14610, 83029, 52170	0.2163	1850	0.1065	1583	0	1	1	1
Mtmr9	ATATCGACGCCATCGACAAAC, CCCATGTTTGAAGTGATTGAA, CCCTCTGTTTGCCCTTCAATT, CCTTCGAGTTTAATGAGCATT, CCTTGCTCCTTCGAGTTTAAT, CGAATCATTCAGTTGGATATT	6	40221, 68121, 800, 22720, 10885, 22661	0.2164	1851	0.1392	2060	0	1	1	1
Pdgfra	AGTGGCCATTACACCATTATA, CCTGGAGAAGTGAGAAACAAA, CGATTCCAACTACGTGTCAAA, CGTTCAAGACCAGCGAGTTTA, GATGATCTGCAAGCATATTAA, GCCACATTTGAACATTGTGAA, GCCAGCAATGTCTCAAATATT, GCCAGCTCTTATTACCCTCTA, GGATACTTGGATTGAACTTTA, TCATCGTCCTGGTGGTCATTT	10	11671, 31011, 16168, 46082, 18616, 846, 18521, 21760, 7171, 54838	0.2166	1852	0.1712	2525	0	1	1	2
Grtp1	CAGAGCACACACTTCACCAAT, CGGGTTGCTCTGACCTTAATT, CTGATCCTTATCACGAAGAAT, GCGATCAAATGGTCCAAACTT, GCGGCTTATGAAGAATTCTTT	5	26951, 70118, 9850, 16271, 8694	0.2166	1853	0.1262	1868	0	0	0	2
Mapk15	ACCAGATTATCCTGGAGCAAA, AGAGGACCTTCCGTGAGATTA, CAAACGCCTGTACCAGATTAT, CGAAGAATGACAGGGATATTT, CGGCCGAAGGATGTTTGGCAT, GAAGAATGACAGGGATATTTA, GCCAATGTTCTACTGGATTCT, GCTTGATGTAATCCCAGCGAA	8	19920, 11226, 90567, 8002, 69167, 24504, 26605, 2308	0.2166	1854	0.1493	2200	0	0	1	2
Dctn1	CCAGTCCCAGATCCAAGTATT, CCGTCAGTTCTGCAAGAAGAT, CGCATCAAGCTACCAGCTCAA, GCAACAGATATTGCCCTTCTT	4	44040, 1109, 22620, 14582	0.2167	1855	0.107	1589	0	0	1	1
Tmprss11g	CCCAATTCTCTGCAAGAGGTT, CCGTAAGAATGCGGGTACTTT, CCGTTAAATAGCAGGTATGTT, CGGGACTGGATTAAATCTAAA, GCAATGAGATAGATGTGATAT	5	22629, 11627, 41822, 68939, 3386	0.2167	1856	0.1263	1870	0	0	1	1
Zfp457	ACTGCGATAAGTCCTTCCATT, CCGAACATAAGAAACTTACTA, CCTACAATGCTGAAATGTGTA, CTGCGATAAGTCCTTCCATTA	4	25226, 13498, 4367, 25125	0.2167	1857	0.107	1588	0	0	1	1
Insig1	CCTCTGACATACTCCAGCTTT, CGACAGTTAGCTATGGGTGTT, CGGTTTACTGTATCCCTGTAT, GCCAGCGTTATGCGCTGTATT, GCTACGCTGATCACTCAGTTT	5	26745, 12417, 74086, 89210, 1030	0.2168	1858	0.1263	1871	0	0	1	1
Adap1	AGAGCCACATTTGAGTCCAAA, CCACCTCAACAAGTATTTATT, CCGAAGGCTCATGTACTTCAA, CGGAAGTTTGTGCTGACAGAA, GCCCTGAAATACTTCAACAAA	5	48983, 81913, 79488, 5886, 10803	0.2169	1859	0.1264	1872	0	0	0	1
Cmtm8	ACCCTGACTTACACCAGGATT, CCAGAACGAATCCCACTGTTA, CTATGCTGGAAACACGTACTT, GTGCTTTAATGGCAGTGCCTT, TGGAAACACGTACTTCAGTTT	5	77168, 69206, 56298, 5130, 11063	0.217	1860	0.1267	1873	0	0	0	1
Prkcq	CCATGTCAAGTGTCACGAGTT, CGACAGTGTAATGCAGCGATT, GCAGAGTTCAAGAGAACCAAT, GCGATGATTGAAAGCACCCAA	4	13028, 45066, 40790, 5853	0.2171	1861	0.1076	1598	0	0	0	1
Pef1	CAGTGGCTATATCTCCCTCAA, CCTCATTCAATGACGAGACAT, GCAGCTTGACTGCTTCATCAA, GCTCTCCCAGATGGGCTACAA	4	11831, 54791, 12209, 9447	0.2171	1862	0.1076	1599	0	0	0	1
Trim3	CCCAAAGTTCTGCCTTGTCTA, CCCACGGTTGCACTTTATTTA, CGGAGAGTTCCTCTTCAAATT, GACAGCAACAACCAATGTATT, GCTCAGATAAGTGCTGCCTTT	5	12687, 37435, 82404, 300, 88617	0.2173	1863	0.1269	1876	1	1	1	1
Klhl2	CAGCTTAATCTCCAGTGATAA, CCAGTGATAAACTCACCATTT, GCAGTTAATGGTCTGTTGTAT, GCCTCGAATGACTATGGATTA, GCGTGCAAAGATTACCTCATT	5	82933, 11446, 29816, 67906, 4032	0.2173	1864	0.1269	1879	0	0	1	1
LOC100862646	CAAGCGACACCGCAAGGTTCT, CGCGACAACATCCAGGGCATT, GAAGCGCATCTCGGGTCTCAT, GCCAAGCGACACCGCAAGGTT, GCGACAACATCCAGGGCATTA	5	5972, 57792, 43126, 53705, 10804	0.2174	1865	0.1269	1881	0	0	0	1
Zfp646	CCCAAGATCCTTTGGGAGAAA, GCAACAGAAATGGTTGCAGAT, GCGAGCAACCTTCTTAGCAAT, GCTCTCTCTGTCCAAAGGAAT, GCTTGTAGTAATTGTAGCAAA	5	11041, 5268, 80281, 50448, 21025	0.2174	1866	0.1269	1878	0	0	0	1
6820408C15Rik	CAGAGAGCTTATTGAACAGAT, CCAACGTAATTCAAGAGAAGA, GAAGGAGGAGAGCAAGACAAA, GACTTCGAAGAAGGGACCAAA, GAGAGCAAGACAAACAGCCTT	5	816, 18178, 12527, 12860, 75239	0.2175	1867	0.1269	1880	0	1	1	1
Gpr157	CGCTCTCTCTACTTTCGCCAA, CTGGTTGTTCTGCATGGCATT, GATAAGAAGTTGGTCCTCATT, GCATGGCATTGGAAACACCTT, GCCGTCTCTCTAAAGAAGATA	5	10167, 73618, 7898, 64006, 50784	0.2175	1868	0.1269	1875	0	0	0	1
Pcdh17	CCACTCGAACAAGAACCAGAA, CCCACAGTTGAAGCTAATGTT, CCCATACAAAGCAGGGTCATA, CGACGTGTCTATTTACACCTA, CTGTCAAGTGTAAACGGGAAA	5	12401, 1198, 53607, 62185, 23067	0.2175	1869	0.1269	1877	0	0	1	1
Slc35e1	CACCAAGAGGATCATGGTCAT, CCAGTCCTTAACTCCTGATTT, CCTGTACAACAAGACCAAGTA, GAAACAGAGCACCAAGGTATA, TCATCACTGTTTCCCTCATTA	5	78845, 58663, 138, 53523, 12771	0.2178	1870	0.1271	1882	1	1	1	1
Msh2	ACCTTTACTGTGTGCTGTTCT, CCCGGCAATCTTTCTCAGTTT, CCGACTGTATCAGGGTATTAA, CGAGATCATTTCACGGATAAA, GCAACGAAGATTGGTGCCTTT, GCTCACTTAGACGCCATTGTT, GTTGGCGTTATGGGTATTAAA	7	7931, 71676, 50754, 66540, 26554, 5705, 74826	0.2178	1871	0.146	2156	0	0	0	2
Ppp1r2	ATATTCTTGTGCCTCATATTT, ATGAATATCCTGGCAACATAT, GCACCAAATGAATCTGTTATA, GCCCATCAAAGGAATCCTGAA	4	12746, 73759, 60329, 6856	0.2179	1872	0.1084	1608	0	0	0	1
Sh3glb2	AGGAGACTAGACCTCGTAATT, AGTCTCAGACAACCTACTATG, CAGAAACAGCTAGGCAGATTT, CGAGTGGAGGAGTTCCTATAT, GATCAGCAGTACTCATGTGAA, GCCCGTCATTCAGCTATTAAA, TCAGGAGACTAGACCTCGTAA	7	4908, 21045, 32169, 30894, 73085, 84103, 8206	0.218	1873	0.1462	2158	0	0	1	2
B430306N03Rik	ACCTGAGGAAAGCTCGAAGAA, CCCGTCACTAACAGAAGCTTT, CCCTGAACGTTCAGAACCAAT, CCTGAGGAAAGCTCGAAGAAA, GCGGTGATCTTCTGAGGTATT	5	10908, 42248, 54093, 48139, 5773	0.218	1874	0.1272	1883	0	0	0	1
Oxtr	CCCATGGATCTACATGCTCTT, CCTGTGTCTCATACTGTTCCT, CGTCTACATTGTACCGGTCAT, GCCTTTCTTCTTCGTGCAGAT, GCTGTGTCGTCTGGTCAAATA	5	2883, 75395, 56831, 11874, 14285	0.2181	1875	0.1273	1885	0	0	1	1
Pitpnm2	AGAAGTTCTCCATTGACATTG, ATGGCTGGCTCAGCACAATTT, CAATACTATCACCAACGTGTT, CCCAGTGAGTATAAGACAGAA, CGAAGGATGTCGCAGTCTATA, GACAGAAGCGGATTGACTATG, GCCAATGACCGTGGATGAATA, GCCTTCTCTTTGATTTCTAAA, GCTGAACATCATCGAGGATGA, TGCGCCACAAGGCTAACTTTC	10	68327, 84048, 14822, 4993, 79564, 10337, 41384, 48662, 5841, 81837	0.2181	1876	0.1734	2543	0	0	1	2
Txnrd3	CCCTCACTTTGTTTCCATGAA, CGGAAACAGTAGAAGGGATAT, CGGAAGAGAAAGCCATCGAAA, CGTAGGCTGTATTCCAAAGAA, GCAAAGATAATCTGCAACAAA	5	1803, 12235, 18595, 47613, 86322	0.2181	1877	0.1273	1884	0	0	1	1
Bap1	CCCACAACTATGACGAGTTTA, CCCTCAGTATTACCATGTCTT, CGTCTGTGATTGATGATGATA, GCACTGCTAAAGTGTGTAGAA, GCCCACAAACTACAACCCATA	5	15903, 2139, 44321, 12126, 44500	0.2181	1878	0.1273	1886	0	0	1	1
Aldh18a1	ATAGCTGTGCCCAGATCAAAT, CCCATCGTCAACACAAACGAT, CCCTTATTTGACCAGATCATT, CGCCAAGAGAATTGTAGTGAA, CTCAAGTATCTTCACGAGAAT, CTGCTGAGAACACCCTTATTT, GCCATTGATCACATCCATAAG, GCTAATGTTCACACTCCATTT, TAGCTGTGCCCAGATCAAATC, TCTGCTGAGAACACCCTTATT, TGTCCAGCCCTCAGCTATTAG	11	14771, 6757, 3351, 83006, 51779, 73249, 74657, 20848, 35157, 5700, 35536	0.2182	1879	0.1701	2507	0	0	1	3
Naa16	CCAGGTAAGAAGTTTCGAGAA, CCATACATACTGCATGAGAAA, CCTTTGCCATTGAAAGTAATA, GCCTTCAATTTACATGGACAT, GCTCCCAATATGAAGAGTATA	5	64356, 7102, 10482, 38671, 54828	0.2183	1880	0.1274	1888	0	0	0	1
Aif1	CAAGGTGAAGTACATGGAGTT, CAATTCCTCGATGATCCCAAA, CCTAGAGCTGAAGAGATTAAT, CTTGAGAATGATTCTGATGTA, GACGTTCAGCTACTCTGACTT	5	48029, 43181, 3536, 11679, 12585	0.2185	1881	0.1275	1891	0	0	1	1
Whsc2	CCCAATGTTCAAGACATCTTA, CCTCACTAGAGAACAGATGTT, CCTGTTCAGCAGCAACCTAAA, GCCATTTCTCTGGAGAGTTTA, GCCTATGACCAATGTGTCCTA	5	12776, 444, 13092, 12712, 82945	0.2185	1882	0.1275	1890	1	1	1	1
Gstm5	GATGCCAATCAATAACAAGAT, GCTACAATTCTAACCACGAAA, GCTGAAACAATTCTCATTGTT, GTCTTGGATCAGAACCGTATA, TCTTGGATCAGAACCGTATAT	5	88782, 10603, 60455, 9805, 9198	0.2187	1883	0.1276	1892	0	0	0	2
Zscan21	CCAATAAGTATGGGTCACGGT, CCTCTCTTCAAGACACAGGTT, CGTCTGTTGTTCTCGTTGTAA, GCCAGCCCTAAATATGAGTTT, GCTCCAACCTTACCCTTCATT	5	9611, 35760, 24647, 82447, 9670	0.2187	1884	0.1276	1893	0	0	0	2
Mier3	CCAAGTGAACTTGCAGACGAA, CCAGCAATGGTGAAAGTGATT, CCCTGTTCAATGTAGCATTAT, CCGAGATTGAGGACGTTGAAA, CCTTATCTTGGCGAGTACAAT	5	76936, 83114, 10695, 6555, 61198	0.2188	1885	0.1279	1894	0	0	0	1
4933425L06Rik	CGACTGCTTAAATCCTTCCAT, CGGACCAAGTTTAGCAGTGTT, GCCACAGTTAATAAGGCCAAT, GCCGTGAGATTACTGTAAGAA, GCCTTTGAGGAAGAAACAGAT	5	48273, 72191, 10706, 29035, 6525	0.2189	1886	0.1279	1895	0	0	0	1
Socs3	CAAGAGAGCTTACTACATCTA, CTTCTTCACGTTGAGCGTCAA, GATCAGTATGATGCTCCACTT, GCTAGGAGACTCGCCTTAAAT, GCTGCAGGAGAGCGGATTCTA	5	10652, 41793, 6712, 12651, 82291	0.219	1887	0.128	1898	0	0	0	1
Skil	CGCTGGCACAATTCCACTTAA, CGGGAATGGAATTGCCATCAT, GCCTTTGAAGTGGAACATGAA, GTTTAGCATGAGAAATGGAAA	4	67877, 68601, 1583, 14594	0.2192	1888	0.11	1635	0	0	1	1
Tril	CCAACATCTCCTATGCACCAA, CCAGTATCTTACTGTGTTATT, CGGCAACTTCATCACCAACAT, CTGGATTACCTGGATGACCAA, GCCAGTATCTTACTGTGTTAT	5	4990, 79717, 11241, 31233, 57194	0.2193	1889	0.1282	1901	0	0	1	1
Kcne1l	CCCGGAGAATGGCCAGGGCTT, CTACTCATCATGATCTTCTAT, GACGCTTATCTCTACATCCTA, GCAAACCCTCTTGAACCGCTT, GCCAAGGGTAACGACGCTTAT	5	85452, 7233, 18198, 10495, 45954	0.2193	1890	0.1282	1900	0	0	0	1
Fn1	CCTGTCAACAGAAATACCTTT, GCCAGGATTACTGGCTACATT, GCCAGTTTCCATCAATTATAA, GCCTAGAAATACCTTTCTCTT, GCTAAACTCTTCCACCATTAT, TGATGTCCGAACAGCTATTTA, TGCCGTCTCTGTGCGCTATTA	7	34004, 80658, 22592, 80214, 47793, 6457, 7750	0.2193	1891	0.1482	2183	0	0	0	2
Zc3h7a	AGCTTTGAGTATAGCTAATTA, ATCTGTATGTAGGTTGCTAAA, CAGAAACAAATGATGCTGTTA, CGGAGTACATGATGGATGAAA, GCAACCATATTGCTAATAGAA, GCTCAGAAATTGGGATTTAAA, TATGAATGGACCAGGTAATTT, TGTCGACATGAAGTTCGTTAT, TTTGATCTATGCAACCATATT	9	80461, 59458, 18241, 70225, 5323, 29930, 6269, 75480, 82466	0.2194	1892	0.1622	2381	0	0	0	2
Acp2	CACAGAGGTAATTGTGGCATT, CACCAGAGTATCAGAACAGAA, CAGCACTTCAACCCTAACATT, GCAAATCACTAGGAGTATAAA, GCTCCAAATGAGAATATGATA, TATGCTTCCTGCCACATATTT, TCAGCACTTCAACCCTAACAT	7	63259, 9138, 32459, 57006, 2314, 38381, 50023	0.2195	1893	0.1484	2187	0	0	1	2
Eif2b2	CCAAAGAAGGTATCGAGACAA, CCAACATCATTGAGGCGATTA, CCTTTCACAGAAGGAGACATT, GAAGGCACAATGGAGAACATT	4	7554, 12646, 50503, 12628	0.2195	1894	0.1101	1636	0	0	0	1
Pter	CCATCGAGAGAACCTTCAGTT, CCATTCCAGATAATCCGTATA, CCCATTGTCTTTCCTTAATAA, CCCTAAACAATGGCTGACTTT, GTGTGGAGTTATTGGAGAAAT	5	8455, 41137, 10103, 34120, 33601	0.2195	1895	0.1287	1908	0	0	0	1
Dbil5	ACTGTAACATCCCTGTCCCTC, ATATGAGGCCTGGATGGTAAA, ATGCCATGAGGATCTACATTG, CACCCAGGGCGACTGTAACAT, CCTGTGAGTGATCAGGAGAAA, CGTTAGCAGAAACACCAATAA, GCCATGAGGATCTACATTGCT, GGTAAACAAAGGGATGTCCAA, GTCCAAGATGGATGCCATGAG, GTGAGAGCAAAGGCCAAATAT, TACATTGCTAAAGTGGAAGAG, TGCTTCACTCAAGCAGCTGAA, TGTGAGAGCAAAGGCCAAATA	13	68893, 83477, 9067, 55351, 19523, 19655, 1544, 82997, 14716, 22985, 5434, 81644, 50992	0.2196	1896	0.1827	2715	0	0	1	3
Nudt9	ACCCTCGGAACACTGACAATG, ATGCCGCAGATCCTATTATAA, CACCTGGAAATGCTTGCAACA, CCACCTTAACGCCAACATCAT, GCCAAGAGCATCTCGTGATAT, GCCATCAAGAGGAAAGACTGT	6	78929, 73974, 80733, 6550, 9133, 40876	0.2196	1897	0.1433	2117	0	0	0	2
Dennd2c	GACAGCTAAGTTTCACCCAAA, GCCAAACACTTGACTTATGAA, GCCAGTGTCCATGATTGACAT, GCGGAAGACTATGGAACTGAA	4	69433, 44309, 3911, 13848	0.2196	1898	0.1102	1638	0	0	1	1
Olfr1047	CACATGACATTGAACTGATAA, CCTTTGCTCTATACTGTCATT, CTCCAAGCTACAAACACCTAT, GCCACACAGCTTTCTTTCTTT, GCCACTCCTTTGAAACTGATA	5	350, 68274, 85165, 12812, 22316	0.2197	1899	0.1289	1909	1	1	1	1
Fbxo31	CACTTTAGAAATGAACGCACA, CTTTGACGAGATGCTCAGGAA, GCACTTTAGAAATGAACGCAC, GCAGACTGTAGAGATTGACCT	4	12351, 74335, 8420, 86229	0.2197	1900	0.1103	1641	0	0	0	1
Olfr19	CCACTTTGTTTGTGAGCTTAA, CCATACGTGCAATCTCATCAT, GAGCTTAATCAACTGGTACTA, GCCACCATTACAGATTCCCAT, GTGATGTACTTTGCAGCTATA	5	30030, 8995, 9936, 57707, 41968	0.2198	1901	0.1289	1910	0	0	0	2
Hsph1	CCATAGTATGTGATCCTGTAT, CCATGCTGCTGACTAAGTTAA, CCTGTTGTAACTCAACCCAAA, CGAGTGCTTTATGAATGACAA, GCAGGCATACATTGACAAGTT, GCCATAGTATGTGATCCTGTA	6	89677, 26525, 9686, 33523, 4935, 78339	0.2198	1902	0.1435	2121	0	0	1	2
Golt1b	CCTGGAATCAGATCATTCGTA, CGAGAGAACGTTCAGATTCTT, GCCTCTGATAGGCATGATCTT, GCTGATTACTTCATCTTGATT, GTTGGCTTTATCAGAAGAGTA	5	9975, 81161, 8908, 48925, 13460	0.2199	1903	0.1292	1912	0	0	0	2
Lrrc46	CCACATTACTGAAGCCCTTAT, CCGGAATATTCACAGCCTCTA, GATTACTTGTATCGGGAATTT, GTCTTTGGCAAGAAACCAAAT, TCCACATTACTGAAGCCCTTA	5	51880, 32138, 12447, 81640, 1494	0.2199	1904	0.1292	1913	0	0	1	1
Dnajc12	CAGAAGTAAGAAGGACTTGAT, CCTGCGGAAGTTCAGAAACTA, CGGAAGTTCAGAAACTATGAA, GCTCTGTATCATTGATTCTTA, GTTGAGCAAATCTTGGCAGAA	5	8266, 33137, 20366, 10192, 60955	0.22	1905	0.1292	1914	0	0	0	1
Ehmt1	CCCTTGATCTTCGAGTGCAAT, CCTGAGTTTAACATGGCAGAA, GCAGAGAACAACCACTTGGAT, GCGCTGGCTATATGGAAGTTT	4	15989, 13004, 6536, 61093	0.22	1906	0.1106	1646	0	0	0	1
Dnajc7	CCTGTGTACTTAGAGCAGTTT, GAGGAGAAGAAGTTTAAGGAA, GCCATAGAAGACTGTACAAAT, GCCGTCATGGAGTATGAGAAA, GCTAAGAAGGACTACAACGAA	5	17352, 87843, 6381, 78940, 10826	0.2201	1907	0.1293	1916	0	0	0	1
Apbb1ip	CCTGAACTTCTCTCTAAAGAA, CGCTACTTTCTTCTGAGAGCT, GCACTGGAAGACCAAGATTTA, GCCAAAGCAAAGGCTGATAAA, GCTACTTTCTTCTGAGAGCTT	5	14820, 77065, 5027, 11281, 67994	0.2201	1908	0.1293	1915	0	0	0	1
Mnt	CCACTGACTGTCATTCCTATT, CCGAATGACTATGTCCAGATT, CCTATTCCTGTAGTGACCAAT, CTGTCGCACCAGCAAGTAAAT, GACGACAAGAAGACTTCGAAT	5	11502, 13628, 39298, 67301, 4369	0.2202	1909	0.1294	1917	0	0	1	1
Mlec	CCATGATGAAATCATCCCGAT, CCCTTATTTCTGAATGTGTTT, CCTATATCAGACAGAGCGGTA, CCTTCGGAGTGTTCATTCCAA, CGGTACAATGAAGAGACCTTT	5	79331, 7269, 66531, 49997, 10547	0.2204	1910	0.1296	1918	0	0	0	1
Tmem194b	CGTGAGTCGAAACATTGTGGA, GCCAGCACACAGAAAGCATTT, GCCCTGAATGAAGACCTTCAT, GCTGTGGTATGGAAACAGAAT, GTAAGCGTGAGTCGAAACATT	5	81204, 2157, 55798, 12253, 58481	0.2204	1911	0.1296	1919	0	0	1	1
Fkbp5	CCATCAAATGCAACTCTCTTT, CGAGATGTGGTGTTCGTTGTT, CGAGGGATACTCAAACCCAAA, GAAGAAAGACAGAGGAGTATT, GCGGGTGATGAGATTTGCTTA	5	2026, 12306, 33851, 42630, 64805	0.2206	1912	0.1298	1921	0	0	1	1
Foxn3	AGTATTGGGAAAGGGTCATTG, CAGTACCTTCTTCAAGAGAAA, CCGTTACCAATCACTCCCATT, CTCCTTTAGCTGCCTCATATT, GCACACAAACACACAACTTAA, TCTTAGAACATTTCCCGTATT	6	92135, 9603, 21835, 5302, 61937, 42089	0.2206	1913	0.1442	2129	0	0	0	2
Wbscr17	CGCTTACTGCTCAGCTCATTT, CGTTGGAACTTCATCCAGAAT, GCAGCTTAATGGCTTATCTAA, GCGGAAGAAGAAACCGTATAA, GCTTCGTAATAATAAGGCCAA	5	3754, 25814, 39165, 11733, 79894	0.2206	1914	0.1298	1922	0	0	1	1
Krt6a	CAACTTCTTGAGAGCTCTCTA, CCTCAGCTCTTCTACCATCAA, CCTGTGAGCTTACATCACAAT, GCAGACAGTCTAACAGATGAT, GCCTACATGAACAAAGTTGAA	5	34270, 66133, 77299, 12503, 1476	0.2208	1915	0.1301	1923	0	0	1	1
Vps72	AGCCTATAAGGAGCCTCTAAA, CAGTTCCTCCCTAGTTCATTT, CGTTCACTCGAGACCTATGAA, GAAGTGCCCTGGGCCAATAAT, GCAAGTCTATGCGTCAGTCTA, GCGTCAGAAGATTGTCATCAA, GTCAGAAGATTGTCATCAAAT	7	8491, 8868, 20746, 19800, 67113, 42652, 4436	0.2208	1916	0.1503	2217	0	0	1	3
Tmem190	CAAGGTTTCTACATCGGAAAT, CTCTTCCTGATCACCAGTATC, GCGAATGGAATCCAGGGATTT, GGACGGTGTGTGCTATCATCA, GGGTCAGGCAGCAATTGAGAA	5	10868, 30322, 63575, 34622, 6420	0.221	1917	0.1302	1925	0	0	0	1
Vmn1r26	CAACCAAATGAAGATCAGCAA, GAGTGACACCAACCAAATGAA, GCATCTTCATAGCATCAATTA, GCCAATATGTTTCTACTGATT, GTCACTGAACATTGAGAATAA	5	32207, 8018, 10336, 83921, 15559	0.221	1918	0.1302	1926	0	0	0	1
Grm3	CCAGCATATAGGTGGAAAGTA, CGCTACTTTAACTGGACCTAT, GCCTGTCCTATTGCATGACAT, GCGACAAATCGCGCTATGATT, GCGGGAAACAGTCATCCTAAA	5	20872, 76400, 12281, 2199, 48230	0.2211	1919	0.1303	1930	0	0	1	1
Fkbp9	CATCAGCATCACTTCCCACTA, CCACACCTTTGACACATACAT, CCAGGTGTCTACCTAAAGAAA, CCCAAGGATACCATTTCCATT, CCTACGGAAGTGAAGGAGTTT	5	12002, 3047, 58794, 33126, 91022	0.2212	1920	0.1303	1929	0	0	1	1
Tmx1	CCCAAGGACTAAGAAGGACTT, CGGTTTATCATAACTGCTCTT, GAACCTATATCATCATGGTTT, GCCCATTATTTCAAGACATAT, GCTGGGACTTTGTATGATATT, GGACTAAGTGGACGGTTTATC	6	9527, 13263, 75370, 5634, 31512, 84019	0.2213	1921	0.1449	2148	0	0	0	2
Olfr124	CCTGGATTAGCGGATTTGCAA, CGATGCATTCATATGGCCACA, GAGACACCTCTCTTTGTAATT, GAGGGTAATAGACCATTTCTT, GCCTACATCTTTGCCTTATTT	5	75503, 47311, 54746, 10252, 8325	0.2213	1922	0.1303	1931	0	0	0	1
Gad2	CGATAGATCAACTAAAGTGAT, CGCCAGTGATTAAAGCCAGAA	2	17535, 12015	0.2214	1923	0.0485	742	0	0	0	0
Ulk3	CAGAGGAAGGAGGCAATTAAG, CCAGTGGGACAATGACAATAT, TCGGGAAGTGGTAGCCATAAA, TCTGGTGGCAGGTGTACTAAG	4	21799, 15120, 481, 84622	0.2215	1924	0.112	1657	1	1	1	1
Stoml1	CCAGAGTATCTACTTCCTGGA, CCCACCTATGAGAGGATGATT, CCTGCCCTTTATTGACTCCTT, CTGAAGATGTTTCAGTCCCAA, GCCCTTTATTGACTCCTTCCA	5	4853, 11418, 85497, 19437, 37888	0.2215	1925	0.1304	1932	0	0	1	1
Cpa3	CCATGATATTGCTGTGAATAT, CCATTATATGTCCTCAAGATT, CGTGCTAATCAATGCTTGGGT, CGTTACATCTACGGCCCAATA, GCCAAGTATATCCTCAAGAAT	5	39732, 10391, 58457, 19602, 7950	0.2216	1926	0.1306	1935	0	0	0	1
Pnma3	CCATATCAATCCCAGGGTTAT, CCTCTAAGATTCACCAGAGAA, CCTGCTCTACAGGTTGTCAAT, GAACTATTTGTTCCGGCCTTT, GCCATATCAGAGTACACTGTT	5	14870, 12948, 25899, 49712, 280	0.2216	1927	0.1306	1934	1	1	1	1
Olfr215	CAAACCTTTGTCACTCTATTT, CATCATAACCACTATCGCATA, CGTTCGCCCTTGCTTTGATTA, GCCTGTTTCATACAAACCTTT	4	2410, 87600, 14487, 67725	0.2216	1928	0.112	1662	0	0	1	1
Taf7	AGCATTGAGTTACACCCTGAT, CGTTGGGAGATAATTGCTGAA, GATTACATAGACAGGTTTGTT, GCCTTGTGTTACGGAAAGCTT, GCTTGTTGACTTTAGTCCTTA	5	43213, 20299, 30835, 10617, 7284	0.2216	1929	0.1307	1936	0	0	0	1
Coro7	CCCATAACAAACAGCCTATAT, GCATGTAAGGACAAGCAGCTT, GCCTGGTTTGAGGGTGCTAAT, GCTTCCAGTTCCTATGATCTA, TCAGTGATATTCGTGCTGTAA	5	9833, 41697, 42839, 31064, 9677	0.2219	1930	0.1311	1939	0	0	0	2
Casp8ap2	CCCAAGAATGACGTGAAACAT, CCCAGAGACTTAGTCCCAATT, CCTGTTATTGGTCAGAATGTT, CGTAAGGATGAAGAGATAAAT, GCCTCAAATAAGGTGGTTCAT	5	31583, 60956, 36770, 11590, 4425	0.222	1931	0.1312	1940	0	0	1	1
Rwdd2b	ATGGAAGGACAGCGGAAATTT, CCAGCTGTATCAGTTCTTAAA, CGCAAGTGTACTTTACGATCA, GCCAAGGACCTAAGTTCAGTT, GCGATCATCGCAAGTGTACTT, GCTCCATTCTAGGATGTACTA	6	8929, 65312, 63472, 45531, 90775, 7555	0.2221	1932	0.1458	2155	0	0	0	2
Snrnp40	CAAGGAAATGTCCACAACTTT, GCAGGATTTGACCGGCTAATA, GCTCCATCAATGAAGTGGCTT, TCAAGGAAATGTCCACAACTT	4	11915, 81666, 29995, 10242	0.2222	1933	0.1123	1672	0	0	0	0
Elovl5	CGCGGGAGAATCCGATATGAA, GACAATTACATCCCTACGTTT, GCCCAGAGCTTGTTAGTTTAA, GCTGTCTCTCTACATGTTCTA, GTCCTCATGTACTCGTACTAT	5	66080, 54840, 79954, 4120, 11706	0.2222	1934	0.1313	1943	0	0	1	1
A830031A19Rik	CATCATGGTGGTCACTACATT, CCACGAGAATGTTGATAACAT, GATAACATCATGGTGGTCACT, GATGCCTTCTATTATGTGTGT, GTGTTGCGTATAGATGTACTT	5	59424, 29283, 11383, 83930, 5108	0.2223	1935	0.1313	1941	0	0	0	1
Syt8	CCCAGGGAAGTGGATCGTGTT, CCTCCAAGAAAGGCACGACTA, GAGTCCTCTTAGTCTCCTGTT, GCTGTCACTAGAGTATGATTT, GCTTATGTTAAACCAGAGAAA, GGGAGAAGACATGAGACAAAG, TCCTGCTGTCACTAGAGTATG, TCTGTGTCATCTGTTGCTATT, TTGGAAGCCAGGAGATTAGAG	9	37561, 89913, 3492, 16048, 6992, 29628, 47823, 55742, 57944	0.2225	1936	0.1656	2440	0	0	1	2
Wbscr16	CAGACAAAGGTGAAGTCTATT, CTGTGGCTATGGATTCACATT, CTTTGGTTTGACGGAGTTTAA, GTGGATCACATGGTGACTCTA, TGCTTAGCTTTGTCCGCTGAT	5	18688, 7528, 10587, 47274, 45235	0.2225	1937	0.1315	1945	0	0	0	1
Prkra	CCAGAGAACCACATTTCTCTA, CGGCATGAAGACCAAGAACAT, GCAAGGCTTTAACATAACGTA, GCAAGTATTTGCTTTGCAGTT, GCTGGCGACTTCCTGAATATA	5	10320, 48224, 53183, 8330, 36314	0.2225	1938	0.1315	1948	0	0	0	1
Atp1b3	ACAGCCTTGCATCCTTGTGAA, CCAGACGGATATCCACAAATA, CCGAAATATCGAGACCAGATT, CCTGTCTTCTTTGTGTGTAAT, GACAAGTTCTTGGGACGTGTT	5	5791, 45709, 32512, 19410, 11170	0.2226	1939	0.1315	1947	0	0	0	1
Timm17a	CCAGTGGGAATAAACCACAGA, CGAGGAAGTTTGACAGCTATT, CGGGCCATAAAGAGACATTTA, CGGTGCCTTAACAGGAGCCAT, GCGGCATTCTCCTAGCTTTAA	5	7023, 82188, 73258, 69275, 10761	0.2226	1940	0.1315	1946	0	0	0	1
Igsf3	CCGTGCGTCTGGAAACAGATA, GAGTTACAGTGCCAAGATGAA, GCCTTCAACAGCTCACTCATT, GCCTTCATAGTAACAAGGATT, GTGGCGAAGGAATTACAACAA	5	61304, 7510, 34331, 40923, 10614	0.2229	1941	0.1318	1950	0	0	0	1
Omg	CCAACCAACATGCCTTCCAAA, CCACATTTGGTGTCACTCTAA, CCAGTCTTATATTTCTGACTT, CCAGTGATTCAAGCTATATTA, CCTGGATGTTTCTAAGAATAT, CCTGGGTTTACCTCAAGCTTA, GAGGGAAGAAACCACTGCAAA, GCAAGAGATAACTCTTCATAA, GCAGGAGAACATTATACATTT, GCCAAATAACTTCTCTGAAAT	10	32218, 69676, 3104, 6636, 40199, 56480, 69238, 77004, 89023, 79950	0.2229	1942	0.1801	2675	0	0	1	2
1700012P22Rik	ACTTCGTTTCTAGGTGGTATT, CACTACAACAGGCACAATTAT, CCACAAACTATGGACTATTAG, TAGCCTGAAAGAGAGCATTTA, TCCACTTGCAGTCTGGTCAGA	5	27400, 75583, 11032, 78857, 6271	0.223	1943	0.1318	1951	0	0	0	1
Gm5105	CAGGACAGAGATGGACTGATT, CATTTCAGCTTTCTCCCGAGA, CCGAGACTTCTACTTACCTTT, GCCACCAAACACGCTAAACTA	4	74178, 43873, 4686, 13822	0.223	1944	0.1128	1678	0	0	1	1
Amy2a4	CATGAGCTGTGCTGATCAAAC, CCATAGACAACTGTCTTAATT, GATTTGGATTAAGCATCAATT	3	4769, 49189, 16428	0.223	1945	0.0861	1295	0	0	1	1
Nefm	AGAGTGGTTCAAATGCCGCTA, CCGTGGAAGAAGTAAAGCCAA, CGAAGAGTCGTCGATGGTTAA, CGATGGTGCTACCAAATACAT, GTCACAATATCCAGTAAGATT	5	54322, 75382, 12842, 881, 17181	0.2232	1946	0.1322	1953	0	1	1	1
Calcr	CAACGCTTTCACTTCTGAGAA, CACTTGCTTTACATCATCCAT, CCTCCAATCAGCAACAACGAA, GTTCTTTATTACCTGGCTCTT, TCTGATTCATTTCCAGGGATT	5	80241, 38470, 48177, 11804, 3997	0.2232	1947	0.1322	1952	0	0	1	1
Otop2	CCAAGGCATCACCTTTGCTAA, CCAATACGCTATCTCCTACTA, CCAGACTTACTTTCTCTGGAT, CTTTGCTTCCACCATGCTGTA, GCTGTATGTCATGTGGAAGAA	5	12076, 18912, 50419, 42764, 3193	0.2233	1948	0.1324	1957	0	0	1	1
Ikbkg	AGACTACGACAGCCACATTAA, CCACACTTAAGGGCTTGCTTT, GCCTTAAAGGAGTTGGAGCAA, GCTCCTGATATGGACACTCTA, GTAGCCAAACAGGAATTGATT	5	15925, 31485, 10280, 19905, 8598	0.2234	1949	0.1325	1960	0	0	0	1
Wdr13	CATGAACATCTCCACAGGCAA, CCGAACAACCCTTGATCGAAT, GCTACTACATTTGTAGCAATT, GCTGAGTGAGAACTATGCCTT, TGAAGATATGTGCGTTCACTT	5	83172, 42813, 8517, 60262, 10322	0.2236	1950	0.1325	1959	0	0	0	1
Gm15698	CCAGCTCCTTGATGAGATGAA, CCATAACCTCCCTAATCAATT, CCCTATTCTCCTCCTCTAGAT, GACCTGCTAAAGGCTTCTCAA, GAGCACAGTGTTGGCGCTCAA, GCTAATGAACCACTTTCCAAT	6	27613, 8807, 8173, 42856, 54334, 21014	0.2237	1951	0.1472	2168	0	0	0	2
Pdia3	CGCTTACTATGATGTGGACTA, GACCAGTTTATGTTTGTGGTT, GCCAACACAAACACCTGTAAT, GCTATCTACAACGAGAAGCTA	4	13387, 6151, 23631, 40280	0.2237	1952	0.1136	1690	0	0	0	1
Rap1gds1	CATGTAATCATGCAGAATGAA, CCAGGAACGATGGAAATTGTA, CCTGCCTAATAAGATTTCTAA, CGTTTGGTTGAATGGTGTGAA, CTCAGAATAATGCAGAAACAA	5	1385, 12713, 42357, 85389, 31368	0.2238	1953	0.1327	1962	0	0	1	1
Grb7	AGCCGCTTCATCTTTCGTAAA, CACCTGCGCCTATCCTATTTG, CCACCTTCACAGAAACCCATT, CGCCAAGTATGAACTATTCAA, CTCTCTCAACCAGTGAAACAT, CTTCGCCAAGTATGAACTATT	6	5749, 9626, 15112, 91388, 92191, 64662	0.2239	1954	0.1474	2171	0	0	0	2
Fermt2	GAAGTATAAGAGCAAACAGAT, GATGAGGAGATGTTCTACAAA, GCCTACCTTGATATGCCGTAT, GCCTTTGTGTTACAATATGAA	4	68626, 1749, 22738, 14877	0.2241	1955	0.114	1701	0	0	1	1
Rap2a	ACCGGCACCTTCATTGAGAAA, CCCATGCTGTTCTGCCTGTAA, CCCTTTATGGAGACTTCTGCT, CCTGGTCTACAGCTTGGTCAA, GCCACTGTTGTGTAAACTAAA, TTGTGCGGCAGATGAACTATG	6	11003, 92370, 1644, 43315, 88053, 57717	0.2241	1956	0.1476	2177	0	0	1	1
Angpt2	CCAACAGAATGTGGTGCAGAA, CGTGCTTAAGATCCAGCTGAA, GCCTCAGCCTACAGTAACTTT, GCTATCCGTAAAGAAGAGCAA, GCTGGCTACTATTTACTATAT	5	30262, 60395, 29250, 9840, 9912	0.2241	1957	0.1331	1967	0	0	0	2
Olfr481	CCTGCTCTACTCCACTCAAAT, CGATCATTGTGTCTTACATTT, GCTACACTACGTGCTATCTTA, GCTTCATCATTCACAGGCTGT, GCTTGGCTCTGATGTAGCTTT	5	29674, 78524, 11936, 36521, 3778	0.2242	1958	0.1331	1966	0	0	1	1
Dpysl5	CCAGATGTTCATGACCTACAA, CCCAGACATTGTCTATAAGAA, CCTGGTCAATGTGTCTAGTAT, CTGAACATTGTGGCATCCGAT, GATTCTCATCAAGGGAGGCAA	5	5158, 46945, 11481, 42431, 58670	0.2243	1959	0.1332	1968	0	0	0	1
Atp5l	ACAGCTATTCAGAGTGTGAAA, ACTGAGGTGTGGATGTGGTTT, ATGTTTGAAGACCAATCTTTA, CCTTACAGTTAAGGAAGCTGT, CGCTGCCGTGACTTACTCGAA, CTGCTGAAATCCCTACAGCTA, GCTTCAAACACCTTACAGTTA	7	86073, 34920, 9739, 63030, 9331, 68665, 2388	0.2243	1960	0.1545	2256	0	0	1	3
Stx12	AGCTAGAATCTAACTACTAAC, CCTGGCTTTGATGGCAAGATT, GACAGTTCCATCGTGGATATT, GCCATGAAGAGTGGAACCAAA, GCTACAAAGAGCTGCTTACTA, GCTATGATGATCCATGACCAA, GTCAGTGATTGTTACAGTCTT	7	7320, 69891, 57169, 15195, 7946, 7694, 82722	0.2245	1961	0.1548	2259	0	0	0	3
Uncx	ACACGAGAAGAAACTGCTCAA, CCCAGAGGAGATCGCTCGCAA, CCCGCTTCTTTCCGGGACCTA, CCGGCTGCAAACGGAGACGCA, GCGGACAAGGACACGGTCCCT	5	11779, 31388, 57669, 55154, 4299	0.2245	1962	0.1333	1970	0	0	1	1
Pcnx	ACATGGTCATAATCGTATTAT, CCAACATTTCCCATGCCAGAA, CCGAGTTCTTACCACCTACTA, CGGATTCTCATGTATCAAGTT, GCTGTGGATTGGCATCAACTT	5	54016, 9354, 10095, 44329, 32417	0.2245	1963	0.1333	1971	0	0	0	1
Ahcyl2	GAACATCAAACAAGCGGAGTT, GCCTAACTACTACAGGTATTA, GCCTCATAATTGGATCTCTTT, GCCTTGATAGAACTTTACAAT, GCTTTAAGGAAGAGAGCCCAA	5	88331, 11157, 50805, 6191, 56255	0.2246	1964	0.1334	1972	0	0	0	1
Ms4a6d	CCAATTTATGTAGTGGTCAAA, CGCTATTCTCTCTGTCAGTTT, GCAGCAATGTAAGCTGGCTTT, GCATCGCTATTCTCTCTGTCA, GCTGGCTTTCACACAACTAGA, GCTTTCTCTGGGAATGTGATT, GTCACTTTGTAACCCTACATA, TGAGCCATTAAACAGCTGCTT, TGCTCTTACAGGCATCGCTAT	9	64239, 6251, 71557, 45400, 10235, 40207, 5958, 83131, 29649	0.2247	1965	0.1675	2470	0	0	0	2
Mup3	CCTGTGTTTGGAACTGACTTT, GCGAGGAGCATGGAATCATTA, GTTCTATGGAAAGGAACTTTA, TCTGTATCCATGCAGAAGAAT, TGACTGCGATTGGTGAACAAA	5	25516, 77518, 12112, 3345, 28762	0.2247	1966	0.1335	1973	0	0	1	1
Atoh8	ACTCGTCAATTTCACACGTAA, CCTCAAGCCAAAGATGGATTA, CCTGAGGATTGCCTGTAACTA, CGTCAATTTCACACGTAATTT, GTGGAAGACTGTGTGCGTTAA	5	75985, 48536, 35579, 2378, 12437	0.2248	1967	0.1336	1975	0	0	1	1
Lrrfip1	ACATGGAATAATCCTAAATTC, ACGGTTATGACGGAGACTATT, AGGCGATGGTCTAGACGTAAA, CAGATCAGCGACCTCAAATTT, CCCAGTCCCTAAGTAGAAGAT, CTAGACGTAAAGTGACCTTAA, GAACAGATTAAGAAGCTCAAA, GAGCGCTACTCTCGTAGATTC	8	8134, 15202, 70787, 40182, 2905, 60432, 28718, 38694	0.2248	1968	0.1596	2337	0	0	1	2
[truncated: 13,951 more rows]

## Sheet: Table S4
Table S4: Drop off Screen (hairpin drop in metastasis) analysis by Kolmogorov-Smirnov (KS) algorithm
[truncated: 15,920 more rows]

## Sheet: Table S5
Table S5: Drop off Screen (hairpin drop in metastasis) analysis by Top-Best algorithm
[truncated: 86,083 more rows]

[truncated: 1 more sheets: Table S6]
